# Supplementary material for: HUWE1 controls tristetraprolin proteasomal degradation by regulating its phosphorylation
Source: eLife journal article supplement (doi:10.7554/elife.83159), 2023-02-27
Supplement: fig1-figsupp1-data8 [file Figure 1-figure supplement 1-source data 8.xlsx]

## Sheet: TurboID_TTP
Protein names	Gene names	logFC TTP_LPS_vs_empty_LPS	adj.P.Val TTP_LPS_vs_empty_LPS	logFC TTP_EPOX_vs_empty_EPOX	adj.P.Val TTP_EPOX_vs_empty_EPOX
Tristetraprolin	Zfp36	14.0421	8.35816e-06	14.2062	0.000319079
PERQ amino acid-rich with GYF domain-containing protein 1	Gigyf1	10.5037	1.06002e-06	7.97256	1.09154e-05
	Eif4e2	6.59151	6.05439e-05	5.67199	0.000405998
	Trim12c;Trim5	0.123466	0.819954	5.61212	0.000691664
PERQ amino acid-rich with GYF domain-containing protein 2	Gigyf2	5.59314	2.16257e-06	4.70394	2.49209e-06
Roquin-1	Rc3h1	6.38045	4.24406e-06	4.38375	0.000366505
Eukaryotic translation initiation factor 4E type 2	Eif4e2	5.51678	3.49181e-06	4.33991	2.49209e-06
CCR4-NOT transcription complex subunit 7	Cnot7	4.83127	3.82368e-06	4.04955	8.64207e-06
CCR4-NOT transcription complex subunit 6-like	Cnot6l	4.71026	2.16257e-06	3.8673	3.07069e-05
Elongation factor Ts, mitochondrial	Tsfm	1.01262	0.285257	3.75414	2.02801e-05
28S ribosomal protein S29, mitochondrial	Dap3	1.95756	0.0176462	3.41584	0.00288972
Dehydrogenase/reductase SDR family member 1	Dhrs1	1.42627	0.111394	3.33976	2.98994e-05
Peptidyl-prolyl cis-trans isomerase-like 4	Ppil4	-0.561214	0.310485	2.90402	0.000889314
Cytoplasmic polyadenylation element-binding protein 4	Cpeb4	1.28396	0.0103481	2.88535	0.000230551
Activated RNA polymerase II transcriptional coactivator p15	Sub1	3.74981	0.107056	2.8341	0.181511
Conserved oligomeric Golgi complex subunit 5	Cog5	0.541515	0.293938	2.68004	0.000149491
Cell differentiation protein RCD1 homolog	Rqcd1	3.0596	7.36973e-06	2.678	2.20988e-05
Glutaredoxin-related protein 5, mitochondrial	Glrx5	1.61304	0.00884365	2.66502	3.06909e-05
Protein Tob2	Tob2	3.50877	2.0269e-05	2.65791	9.74576e-05
CCR4-NOT transcription complex subunit 1	Cnot1	2.87619	4.61706e-06	2.64775	7.30975e-06
Electron transfer flavoprotein subunit beta	Etfb	1.64915	0.0124498	2.57507	2.02801e-05
Nucleoporin NUP53	Nup35	0.151433	0.374115	2.44037	0.0168285
Cleft lip and palate transmembrane protein 1 homolog	Clptm1	-0.214024	0.861704	2.4206	0.00127174
CCR4-NOT transcription complex subunit 3	Cnot3	2.75131	5.87839e-06	2.3753	2.20988e-05
Elongation factor G, mitochondrial	Gfm1	1.30083	0.0197017	2.37267	6.03025e-05
FAST kinase domain-containing protein 2	Fastkd2	-0.527193	0.43245	2.35971	0.000258485
CCR4-NOT transcription complex subunit 2	Cnot2	2.786	5.11452e-06	2.34227	1.68796e-05
40S ribosomal protein S28	Rps28	0.616047	0.00731218	2.33069	0.0325393
NADH dehydrogenase [ubiquinone] iron-sulfur protein 8, mitochondrial	Ndufs8	-0.775739	0.234745	2.31101	0.0014884
Cis-aconitate decarboxylase	Irg1	0.664753	0.0104266	2.30988	0.0179836
CCR4-NOT transcription complex subunit 8	Cnot8	3.40202	0.000432213	2.29472	0.000192465
Lipoamide acyltransferase component of branched-chain alpha-keto acid dehydrogenase complex, mitochondrial	Dbt	2.51602	0.0105814	2.17578	0.039873
Pyruvate dehydrogenase protein X component, mitochondrial	Pdhx	0.526162	0.19678	2.17071	2.41605e-05
CCR4-NOT transcription complex subunit 6	Cnot6	2.25994	0.00689503	2.1549	0.00107507
Trinucleotide repeat-containing gene 6B protein	Tnrc6b	2.72155	5.11452e-06	2.15258	3.32097e-05
	R3hdm1	2.29154	2.6853e-05	2.10469	1.11628e-05
Short-chain specific acyl-CoA dehydrogenase, mitochondrial	Acads	0.707911	0.00236912	2.07599	4.69454e-05
Dihydrolipoyllysine-residue succinyltransferase component of 2-oxoglutarate dehydrogenase complex, mitochondrial	Dlst	1.14747	0.0139903	2.0678	6.93223e-05
Trinucleotide repeat-containing gene 6A protein	Tnrc6a	2.63492	7.27584e-06	2.06594	3.69024e-05
28S ribosomal protein S9, mitochondrial	Mrps9	2.99255	1.39867e-05	2.06241	7.45362e-05
Histone H2B type 1-P;Histone H2B type 1-C/E/G;Histone H2B type 2-B;Histone H2B type 1-H;Histone H2B type 1-B;Histone H2B type 1-M;Histone H2B type 1-F/J/L;Histone H2B;Histone H2B type 1-K;Histone H2B type 3-A;Histone H2B type 3-B;Histone H2B type 1-A	Hist1h2bp;Hist1h2bc;Hist2h2bb;Hist1h2bh;Hist1h2bb;Hist1h2bm;Hist1h2bf;Hist1h2br;Hist1h2bk;Hist3h2ba;Hist3h2bb;Hist1h2ba	-1.82423	0.191822	2.05384	0.111456
YTH domain-containing family protein 3	Ythdf3	2.57513	5.87839e-06	2.0315	0.00733828
High mobility group protein HMG-I/HMG-Y	Hmga1	-2.90825	0.074966	2.00237	0.163662
Tyrosine--tRNA ligase, mitochondrial;Tyrosine--tRNA ligase	Yars2	0.756356	0.00373779	1.95653	0.000882304
CDK5 regulatory subunit-associated protein 2	Cdk5rap2	-0.545628	0.776864	1.92442	0.0501013
Isocitrate dehydrogenase [NAD] subunit alpha, mitochondrial	Idh3a	1.15023	0.0126649	1.89558	0.000291031
Dihydrolipoyllysine-residue acetyltransferase component of pyruvate dehydrogenase complex, mitochondrial	Dlat	1.25006	0.00193316	1.88318	0.000206844
Long-chain specific acyl-CoA dehydrogenase, mitochondrial	Acadl	0.802724	0.0184993	1.88077	5.61716e-05
Non-histone chromosomal protein HMG-17	Hmgn2;Gm6594	-2.59775	0.161663	1.86874	0.038413
Medium-chain specific acyl-CoA dehydrogenase, mitochondrial	Acadm	1.16894	0.000272344	1.86508	4.30253e-05
2-oxoglutarate dehydrogenase, mitochondrial	Ogdh	0.440394	0.0339359	1.85755	2.20988e-05
Aldehyde dehydrogenase, mitochondrial	Aldh2	1.26346	0.00269524	1.85219	4.69454e-05
Very long-chain specific acyl-CoA dehydrogenase, mitochondrial	Acadvl	0.637645	0.0267543	1.80672	0.000101126
Histone H2A type 2-C;Histone H2A type 2-A	Hist2h2ac;Hist2h2aa1	-1.91034	0.211138	1.78098	0.159302
CCR4-NOT transcription complex subunit 11	Cnot11	2.89031	3.7326e-05	1.77392	5.17177e-05
Nck-associated protein 5-like	Nckap5l	1.80848	0.00176821	1.7713	0.0592169
Pyruvate dehydrogenase E1 component subunit alpha, somatic form, mitochondrial	Pdha1	0.869297	0.0173691	1.75206	0.000499572
RNA-binding protein Musashi homolog 1	Msi1	2.64008	1.66974e-05	1.74355	0.018021
Ras-related protein Rab-1A	Rab1;Rab1A	1.77618	0.000478368	1.73574	0.047563
CCR4-NOT transcription complex subunit 10	Cnot10	2.67019	1.41824e-05	1.7321	5.17177e-05
60S ribosomal protein L35	Rpl35;Gm10269	0.18553	0.547551	1.71731	0.00117209
Trinucleotide repeat-containing gene 6C protein	Tnrc6c	3.66741	5.11452e-06	1.70523	0.00529296
ATP synthase subunit delta, mitochondrial	Atp5d	0.33882	0.236744	1.70203	0.0410398
Succinyl-CoA ligase [GDP-forming] subunit beta, mitochondrial	Suclg2	1.18458	0.00375178	1.69955	0.000585761
Ataxin-2	Atxn2	1.73343	1.99687e-05	1.69741	2.41605e-05
Probable helicase with zinc finger domain	Helz	1.81127	0.00022737	1.66573	4.69454e-05
Desmoglein-1-alpha;Desmoglein-1-beta;Desmoglein-1-gamma	Dsg1a;Dsg1b;Dsg1c	-0.876583	0.602644	1.66286	0.341945
28S ribosomal protein S26, mitochondrial	Mrps26	2.57545	2.43574e-05	1.6418	0.000161464
Histone H2A;Histone H2A type 1-H;Histone H2A.J;Histone H2A type 1-K;Histone H2A type 1-F;Histone H2A type 3;Histone H2AX	Hist1h2aa;Hist1h2ah;H2afj;Hist1h2ak;Hist1h2af;Hist3h2a;H2afx	-1.92869	0.194975	1.63686	0.205004
Glutaminase kidney isoform, mitochondrial	Gls	0.592814	0.0149029	1.62715	0.0194452
3-mercaptopyruvate sulfurtransferase	Mpst	1.86576	0.122606	1.61118	0.00114528
28S ribosomal protein S5, mitochondrial	Mrps5	2.40491	0.00126166	1.59874	4.83172e-05
Electron transfer flavoprotein subunit alpha, mitochondrial	Etfa	0.928773	0.0112354	1.59479	0.000296488
Stress-70 protein, mitochondrial	Hspa9	0.537353	0.0676506	1.58407	8.89317e-05
	Pcca	1.50793	0.109849	1.56564	0.0856222
Monofunctional C1-tetrahydrofolate synthase, mitochondrial	Mthfd1l	0.788969	0.0105715	1.52208	0.000142529
Centrosomal protein of 85 kDa	Cep85	2.21378	0.000117637	1.51623	0.000155206
Leucine-rich PPR motif-containing protein, mitochondrial	Lrpprc	0.794738	0.0176837	1.51186	4.69454e-05
Nuclease-sensitive element-binding protein 1	Ybx1	0.271356	0.374115	1.48141	0.00701691
Protein FAM184B	Fam184b	1.78546	0.0028257	1.4725	0.00130381
EKC/KEOPS complex subunit Lage3	Lage3	1.08719	0.319048	1.46516	0.272405
Tubulin beta-2A chain;Tubulin beta-2B chain	Tubb2a;Tubb2b	0.487488	0.716727	1.46	0.0894007
Serine/arginine-rich splicing factor 3	Srsf3;Gm12355	-0.597354	0.025191	1.42875	0.131861
60 kDa heat shock protein, mitochondrial	Hspd1	0.890546	0.00366924	1.41787	0.000196628
Histone H4	Hist1h4a	-2.04892	0.150946	1.40626	0.101059
ATP-dependent Clp protease ATP-binding subunit clpX-like, mitochondrial	Clpx	0.635949	0.00622747	1.40114	0.000574772
RNA pseudouridylate synthase domain-containing protein 4	Rpusd4	0.930572	0.00388275	1.3945	0.00329526
Protein PAT1 homolog 1	Patl1	1.5234	2.0269e-05	1.38839	0.000180279
Pumilio homolog 2	Pum2	1.63204	0.000985805	1.37639	0.00698369
Protein argonaute-2	Ago2	2.90154	2.29241e-05	1.36725	0.00018832
Mitochondrial import inner membrane translocase subunit TIM44	Timm44	0.340707	0.187057	1.36642	0.00318334
Serine/arginine-rich splicing factor 2	Srsf2	-0.435744	0.0654244	1.36495	0.301503
60S ribosomal protein L36	Rpl36	0.0450361	0.753438	1.36312	0.00209556
Protein TBRG4	Tbrg4	0.633476	0.0141129	1.3578	0.000240126
ATPase family AAA domain-containing protein 3	Atad3	0.725333	0.0400097	1.35056	0.000197739
	Card6	1.41394	0.00653384	1.33138	0.0503157
Helicase with zinc finger domain 2	Helz2	1.33639	0.000907378	1.33098	0.00021513
Histone H3.2;Histone H3.1	Hist1h3b;Hist1h3a	-1.52273	0.185124	1.32604	0.0860769
	Fubp3	2.72513	4.61706e-06	1.31718	0.000101436
Pentatricopeptide repeat domain-containing protein 3, mitochondrial	Ptcd3	2.5278	1.87356e-05	1.31432	0.000468516
Translational activator of cytochrome c oxidase 1	Taco1	0.200963	0.526758	1.3028	0.0108135
Trifunctional enzyme subunit alpha, mitochondrial;Long-chain enoyl-CoA hydratase;Long chain 3-hydroxyacyl-CoA dehydrogenase	Hadha	0.757557	0.000487527	1.29978	0.000240126
Succinyl-CoA ligase [ADP-forming] subunit beta, mitochondrial	Sucla2	0.873766	0.00138115	1.29825	0.00021513
R3H domain-containing protein 2	R3hdm2	0.148566	0.386819	1.2952	0.000354544
NFX1-type zinc finger-containing protein 1	Znfx1	0.534524	0.00471641	1.29403	0.00127144
60S ribosomal protein L29	Gm17669;Rpl29;Gm3550	0.209559	0.344023	1.28602	0.00429524
Lon protease homolog, mitochondrial	Lonp1	0.694592	0.11818	1.28255	0.00111309
Cysteine desulfurase, mitochondrial	Nfs1	0.808389	0.00265624	1.2596	0.000902003
Double-stranded RNA-binding protein Staufen homolog 2	Stau2	1.39075	0.137389	1.25055	0.00082113
40S ribosomal protein S30	Fau	0.717278	0.00110395	1.24733	0.0118924
Histone H2A.V;Histone H2A.Z;Histone H2A	H2afv;H2afz	-1.51679	0.295321	1.2434	0.187384
Ubiquitin-60S ribosomal protein L40;Ubiquitin;60S ribosomal protein L40;Polyubiquitin-B;Ubiquitin;Polyubiquitin-C;Ubiquitin;Ubiquitin-related 1;Ubiquitin-related 2	Kxd1;Uba52;Gm8797;Ubc;Ubb;Gm5239	0.402157	0.108661	1.24239	0.018343
WD repeat and SOCS box-containing protein 1	Wsb1	0.652428	0.489875	1.23172	0.0277436
Putative ATP-dependent RNA helicase DHX33	Dhx33	-1.61719	0.174924	1.22243	0.225406
28S ribosomal protein S22, mitochondrial	Mrps22	2.98686	8.06559e-06	1.22104	0.0164672
Eukaryotic translation initiation factor 4E transporter	Eif4enif1	2.44956	1.15587e-05	1.21827	8.89317e-05
Aconitate hydratase, mitochondrial	Aco2	1.2544	0.0054287	1.21709	0.00034221
DnaJ homolog subfamily A member 3, mitochondrial	Dnaja3	0.301758	0.107056	1.20282	0.0379717
Elongation factor Tu, mitochondrial	Tufm	0.583537	0.0079172	1.20101	0.000406923
Acetyl-CoA carboxylase 1;Biotin carboxylase	Acaca	0.703464	0.00640623	1.19912	9.67288e-05
Raftlin	Rftn1	0.632878	0.0879984	1.19427	0.0592043
Poly [ADP-ribose] polymerase 12	Parp12	0.310274	0.106132	1.19108	0.103015
RNA-binding protein FUS	Fus	-0.530697	0.0802546	1.18094	0.126312
Malate dehydrogenase, mitochondrial	Mdh2	-0.0230874	0.971331	1.17194	0.041825
D-beta-hydroxybutyrate dehydrogenase, mitochondrial	Bdh1	0.762014	0.00137213	1.1719	0.00130186
Probable ATP-dependent RNA helicase DHX58	Dhx58	0.56471	0.00968186	1.16914	0.0153391
28S ribosomal protein S31, mitochondrial	Mrps31	3.08077	0.000565684	1.15856	0.0267943
Centlein	Cntln	0.714361	0.207769	1.14767	0.267476
Isocitrate dehydrogenase [NADP], mitochondrial	Idh2	0.942312	0.000358627	1.14238	0.000334769
Methylcrotonoyl-CoA carboxylase subunit alpha, mitochondrial	Mccc1	0.778348	0.000330879	1.13994	0.00144978
Galectin-1	Lgals1	1.04527	0.000985592	1.1348	0.000391684
Succinyl-CoA ligase [ADP/GDP-forming] subunit alpha, mitochondrial	Suclg1	0.733284	0.0054287	1.12722	0.000967415
CUGBP Elav-like family member 2	Celf2	2.53317	0.0771766	1.12023	0.00182585
DNA topoisomerase 1	Top1	-0.940623	0.0069407	1.11091	0.0754365
Pumilio homolog 1	Pum1	1.21184	0.000603276	1.10556	0.000113023
Protein SMG7	Smg7	1.64482	1.99687e-05	1.09941	0.000444453
YTH domain-containing family protein 1	Ythdf1	0.974671	0.000846252	1.0994	0.000414071
Meiosis arrest female protein 1	Marf1	1.68264	0.000603276	1.09809	0.00196806
Trifunctional enzyme subunit beta, mitochondrial;3-ketoacyl-CoA thiolase	Hadhb	0.511902	0.0201314	1.0937	0.000126954
YTH domain-containing family protein 2	Ythdf2	0.89	0.000467512	1.08024	0.00204359
Propionyl-CoA carboxylase alpha chain, mitochondrial	Pcca	0.944795	0.000263295	1.06852	0.00235085
Pyruvate dehydrogenase E1 component subunit beta, mitochondrial	Pdhb	0.517341	0.00493871	1.06763	0.000425376
Galectin-3-binding protein	Lgals3bp	2.40707	1.6209e-05	1.06604	0.00653061
Carboxypeptidase;Lysosomal protective protein;Lysosomal protective protein 32 kDa chain;Lysosomal protective protein 20 kDa chain	Ctsa	0.578209	0.0143916	1.06513	0.00492857
Cytochrome P450 20A1	Cyp20a1	-0.88206	0.355009	1.06147	0.307082
Pyruvate carboxylase;Pyruvate carboxylase, mitochondrial	Pcx;Pc	0.7863	0.000855909	1.06018	0.00518505
	Nxf7	1.02955	0.00754635	1.05683	0.000142952
Tubulin alpha-1A chain;Tubulin alpha-3 chain	Tuba1a;Tuba3a	0.530892	0.117364	1.04731	0.0160737
U3 small nucleolar ribonucleoprotein protein IMP4	Imp4	0.933414	0.245253	1.04485	0.232807
28S ribosomal protein S23, mitochondrial	Mrps23	2.69861	0.0045024	1.04199	0.0390269
Ribosome-releasing factor 2, mitochondrial	Gfm2	0.284197	0.157726	1.04119	0.00222484
Inositol-3-phosphate synthase 1	Isyna1	1.37317	0.00366081	1.04063	0.0477292
Ribosomal protein L19;60S ribosomal protein L19	Rpl19	0.00996793	0.962717	1.0398	0.00267095
Nascent polypeptide-associated complex subunit alpha;Nascent polypeptide-associated complex subunit alpha, muscle-specific form	Naca	0.0482621	0.709376	1.03137	0.21037
	Try10	0.588014	0.0183957	1.02614	0.000667893
Serpin B6	Serpinb6a;Serpinb6	1.0247	0.031165	1.0209	0.000383059
Cytosolic acyl coenzyme A thioester hydrolase	Acot7	-1.38518	0.00863912	1.01868	0.00608892
Muscleblind-like protein 1	Mbnl1	1.30699	0.000607717	1.00801	0.00114528
Acetyl-CoA carboxylase 2;Biotin carboxylase	Acacb	0.738412	0.00517719	1.00259	0.00775848
14-3-3 protein epsilon	Ywhae	1.77323	0.000680575	0.991798	0.00124367
28S ribosomal protein S7, mitochondrial	Mrps7	1.63594	0.0151394	0.983016	0.0993598
CUGBP Elav-like family member 1	Celf1	1.46599	0.00197339	0.982669	0.000723628
High mobility group protein HMGI-C	Hmga2	-1.84766	0.277558	0.980449	0.171805
28S ribosomal protein S18b, mitochondrial	Mrps18b	3.20568	0.000182041	0.976286	0.00124612
Pentatricopeptide repeat-containing protein 2, mitochondrial	Ptcd2	0.648078	0.0545545	0.9694	0.000383059
Probable ATP-dependent RNA helicase DDX28	Ddx28	0.746777	0.474044	0.969338	0.13428
[Pyruvate dehydrogenase (acetyl-transferring)] kinase isozyme 3, mitochondrial	Pdk3	1.44439	0.0616246	0.967983	0.00436925
Succinate dehydrogenase [ubiquinone] iron-sulfur subunit, mitochondrial	Sdhb	0.782217	0.00432724	0.959997	0.000163984
Putative RNA-binding protein Luc7-like 2	Luc7l2	0.262462	0.0487061	0.959796	0.00303757
Tapasin	Tapbp	0.642065	0.00337154	0.95814	0.00195383
Breast cancer anti-estrogen resistance protein 3	Bcar3	0.614663	0.0152204	0.955194	0.00160925
Polyadenylate-binding protein 1	Pabpc1	1.59614	0.000100516	0.955085	0.000196972
Nucleolar protein of 40 kDa	Zcchc17	0.0873253	0.800589	0.953699	0.0643313
Thymidylate kinase	Dtymk	1.09971	0.183823	0.948868	0.00418785
Arginine and glutamate-rich protein 1	Arglu1	-0.0745044	0.599277	0.944925	0.00156076
Transmembrane protein 209	Tmem209	0.112723	0.913092	0.942499	0.139956
Polypyrimidine tract-binding protein 3	Ptbp3	1.09638	0.000139911	0.933168	0.000335429
Polyadenylate-binding protein	Pabpc4	1.46759	0.000172264	0.929957	0.000287722
NADH dehydrogenase [ubiquinone] 1 alpha subcomplex subunit 5	Ndufa5	0.214011	0.614567	0.917972	0.290391
Histone H1.2	Hist1h1c	-1.28872	0.000108399	0.915549	0.0771516
Protein PRRC2A	Prrc2a	0.704186	0.000869567	0.909037	0.000389972
GTPase Era, mitochondrial	Eral1	-0.629745	0.772598	0.907259	0.00109104
2-amino-3-ketobutyrate coenzyme A ligase, mitochondrial	Gcat	0.562145	0.0526515	0.900422	0.0210896
Tubulin-specific chaperone D	Tbcd	0.698021	0.629388	0.900306	0.156547
Acetyl-CoA acetyltransferase, mitochondrial	Acat1	0.489126	0.00561236	0.900294	0.00171314
Monocarboxylate transporter 4	Slc16a3	0.47104	0.0225229	0.899197	0.010504
Protein TANC1	Tanc1	1.75018	1.56743e-05	0.898949	0.000310057
Syndecan-4	Sdc4	0.904498	0.00249665	0.898184	0.0110704
Neuropilin-2	Nrp2	0.0137382	0.993221	0.885129	0.205707
Putative helicase MOV-10	Mov10	1.2102	0.000272835	0.881419	0.0201193
Ubiquitin-associated and SH3 domain-containing protein B	Ubash3b	0.2601	0.223683	0.880052	0.112457
Integrator complex subunit 7	Ints7	0.501756	0.0720798	0.879991	0.00141181
[3-methyl-2-oxobutanoate dehydrogenase [lipoamide]] kinase, mitochondrial	Bckdk	0.587722	0.0283248	0.878336	0.00411156
Acetyl-CoA carboxylase 1;Biotin carboxylase	Acaca	0.869417	0.000286308	0.878018	0.0048604
Protein SREK1IP1	Srek1ip1	0.253041	0.0565296	0.874698	0.00256651
	Rpl3l	1.54873	0.164341	0.872037	0.0291245
Sideroflexin-3	Sfxn3	0.580903	0.00892269	0.865845	0.00894457
14-3-3 protein zeta/delta	Ywhaz	1.32211	0.00049265	0.865624	0.000655107
Heat shock protein 75 kDa, mitochondrial	Trap1	0.585548	0.00323295	0.859287	0.00166485
	Tnip3	2.44733	0.00189902	0.858756	0.340292
NADH-ubiquinone oxidoreductase 75 kDa subunit, mitochondrial	Ndufs1	0.571392	0.00249392	0.858044	0.000420619
Unconventional myosin-Id	Myo1d	0.690926	0.00354134	0.856922	0.000380314
Luc7-like protein 3	Luc7l3	-0.192776	0.119153	0.856528	0.027516
Splicing factor U2AF 65 kDa subunit	U2af2	-0.363482	0.2667	0.848812	0.0329653
Hematopoietic prostaglandin D synthase	Hpgds	0.766029	0.0453293	0.84879	0.00889709
Putative RNA-binding protein Luc7-like 1	Luc7l	0.168784	0.265417	0.846602	0.00523556
2-oxoisovalerate dehydrogenase subunit beta, mitochondrial	Bckdhb	0.515923	0.00335175	0.843995	0.00124509
Stromal cell-derived factor 2-like protein 1	Sdf2l1	0.681321	0.0102506	0.837452	0.0255595
Core-binding factor subunit beta	Cbfb	0.478805	0.0257207	0.836171	0.346379
von Willebrand factor A domain-containing protein 8	Vwa8	0.324418	0.152367	0.835706	0.0201193
Methylsterol monooxygenase 1	Msmo1	0.708878	0.140811	0.83233	0.0335298
Procollagen-lysine,2-oxoglutarate 5-dioxygenase 1	Plod1	0.715639	0.00973609	0.830897	0.0142479
UDP-glucose 6-dehydrogenase	Ugdh	0.991367	0.0176339	0.830723	0.177041
2-5-oligoadenylate synthase 3	Oas3	1.13403	0.00113011	0.828312	0.000410715
RNA-binding protein 47	Rbm47	1.01138	0.000977553	0.825965	0.017372
[Pyruvate dehydrogenase (acetyl-transferring)] kinase isozyme 1, mitochondrial	Pdk1	0.780951	0.000954634	0.820288	0.00236296
Tetratricopeptide repeat protein 39B	Ttc39b	-0.709357	0.232355	0.819768	0.303284
60S ribosomal protein L32	Rpl32	0.280027	0.0696026	0.814803	0.0174289
Glycine--tRNA ligase	Gars	0.534966	0.00534432	0.803417	0.037913
Succinyl-CoA:3-ketoacid coenzyme A transferase 1, mitochondrial;Succinyl-CoA:3-ketoacid-coenzyme A transferase	Oxct1	0.611917	0.0224113	0.79092	0.011599
Inactive hydroxysteroid dehydrogenase-like protein 1	Hsdl1	0.508559	0.00302908	0.789499	0.00186493
Histone H1.5	Hist1h1b	-0.941853	0.0196882	0.786587	0.103889
Serine/Arginine-related protein 53	Rsrc1	-0.312704	0.102233	0.782868	0.017862
Serine/threonine-protein kinase Nek7	Nek7	0.568295	0.0349086	0.781544	0.000934644
Gem-associated protein 5	Gemin5	-0.242882	0.302691	0.777157	0.453941
Ribosomal protein S6 kinase alpha-3	Rps6ka3	1.32772	0.000122128	0.77645	0.00766281
NADH dehydrogenase [ubiquinone] iron-sulfur protein 3, mitochondrial	Ndufs3	0.435651	0.104691	0.77303	0.00154458
NADH dehydrogenase [ubiquinone] iron-sulfur protein 2, mitochondrial	Ndufs2	0.692199	0.00072255	0.772072	0.00866705
Coactosin-like protein	Cotl1	0.314988	0.165264	0.770908	0.00157046
	Spata2	2.55351	0.000230358	0.768405	0.206172
Phosphoenolpyruvate carboxykinase [GTP], mitochondrial	Pck2	0.491914	0.0296912	0.766878	0.00124625
Retinitis pigmentosa 9 protein homolog	Rp9;rp9	-0.152504	0.390445	0.764122	0.00187408
Sorting nexin-8	Snx8	0.428461	0.371905	0.764097	0.00235164
Cyclin-dependent kinase 18	Cdk18	0.703295	0.00985859	0.763638	0.0137941
Translocon-associated protein subunit delta	Ssr4	0.795525	0.00166679	0.761533	0.0374213
Ras-related protein Rab-1B	Rab1b	0.218784	0.31196	0.761316	0.00458384
AFG3-like protein 2	Afg3l2	0.569504	0.0179548	0.760035	0.00846481
Ras-related protein Rab-14	Rab14	0.481181	0.102047	0.757079	0.0137277
2-oxoisovalerate dehydrogenase subunit alpha, mitochondrial	Bckdha	0.611603	0.00568887	0.756627	0.00201445
THUMP domain-containing protein 3	Thumpd3	0.164193	0.280323	0.750457	0.0050717
Retinoid-inducible serine carboxypeptidase	Scpep1	0.5927	0.0021438	0.749805	0.00401031
C->U-editing enzyme APOBEC-1	Apobec1	1.33687	0.000227462	0.743787	0.00659046
Isopentenyl-diphosphate Delta-isomerase 1	Idi1	-0.450339	0.222191	0.743767	0.0809622
ADP-ribosylation factor-like protein 6-interacting protein 4	Arl6ip4	-0.0947922	0.495275	0.742685	0.00285088
60S ribosomal protein L37	Rpl37	0.252492	0.224139	0.740018	0.000500746
Serine/threonine-protein kinase MARK2	Mark2	0.593431	0.0587082	0.738186	0.00221035
Fumarate hydratase, mitochondrial	Fh	0.578475	0.00289755	0.736513	0.0040924
Ribose-phosphate pyrophosphokinase 1	Prps1l3;Prps1	0.687781	0.00760172	0.735228	0.0025332
Methylcrotonoyl-CoA carboxylase beta chain, mitochondrial	Mccc2	0.68737	0.00314756	0.734032	0.00196806
3-hydroxyacyl-CoA dehydrogenase type-2	Hsd17b10	0.668878	0.00351513	0.732512	0.00464965
Mitochondrial ribonuclease P protein 1	Trmt10c	0.366325	0.0189061	0.729723	0.00940213
Isocitrate dehydrogenase [NAD] subunit gamma 1, mitochondrial	Idh3g	0.652979	0.00297492	0.729226	0.00389813
Cytochrome b-c1 complex subunit 1, mitochondrial	Uqcrc1	1.58953	0.0884959	0.726798	0.00627685
Isocitrate dehydrogenase [NAD] subunit, mitochondrial	Idh3b	0.388176	0.0542493	0.726643	0.00294302
Mitochondrial carnitine/acylcarnitine carrier protein	Slc25a20	0.107377	0.63155	0.726634	0.00458384
Selenocysteine-specific elongation factor	Eefsec	0.518631	0.0101932	0.724679	0.0235495
Protein transport protein Sec61 subunit alpha isoform 1	Sec61a1	0.364163	0.0113715	0.724445	0.00223166
Succinate dehydrogenase [ubiquinone] flavoprotein subunit, mitochondrial	Sdha	0.590152	0.00863138	0.722624	0.00374339
	Ankhd1	1.13231	0.000481346	0.721445	0.00109104
Torsin-1A-interacting protein 1	Tor1aip1	-2.12096	0.00622747	0.719974	0.105431
WASH complex subunit 7	Kiaa1033	0.40276	0.0239163	0.718161	0.00843993
28S ribosomal protein S35, mitochondrial	Mrps35	2.36366	0.004144	0.718013	0.0073488
Annexin;Annexin A4	Anxa4	0.214536	0.54648	0.717041	0.029669
Phosphatidate cytidylyltransferase, mitochondrial	Tamm41	0.482282	0.0418619	0.715057	0.00657388
28S ribosomal protein S12, mitochondrial	Mrps12	0.8071	0.00966576	0.7139	0.00261645
60S ribosomal protein L7	Rpl7	0.345895	0.0424964	0.71196	0.0903894
ATP-binding cassette sub-family B member 7, mitochondrial	Abcb7	0.464386	0.0304902	0.709726	0.00192577
Heterogeneous nuclear ribonucleoprotein L	Hnrnpl	-0.476129	0.138355	0.708052	0.119892
Dihydrofolate reductase	Dhfr	0.611383	0.0021469	0.702682	0.01349
Splicing factor U2AF 35 kDa subunit	U2af1	-0.470513	0.171044	0.699399	0.0503157
Annexin A7	Anxa7	0.5824	0.00938415	0.696652	0.000791983
Serine/threonine-protein kinase VRK1	Vrk1	0.39981	0.0257305	0.696578	0.0158404
14-3-3 protein beta/alpha;14-3-3 protein beta/alpha, N-terminally processed	Ywhab	0.695659	0.00646207	0.69552	0.010385
Stomatin-like protein 2, mitochondrial	Stoml2	0.209798	0.11583	0.691286	0.00235085
Delta-1-pyrroline-5-carboxylate synthase;Glutamate 5-kinase;Gamma-glutamyl phosphate reductase	Aldh18a1	0.466142	0.00772666	0.68908	0.00123129
Tyrosine--tRNA ligase;Tyrosine--tRNA ligase, cytoplasmic;Tyrosine--tRNA ligase, cytoplasmic, N-terminally processed	Yars	0.448803	0.00951343	0.687161	0.00425655
Ras-related protein Rab-10	Rab10	-0.89188	0.0982465	0.684684	0.293934
Mini-chromosome maintenance complex-binding protein	Mcmbp	1.98428	0.0332289	0.684645	0.00148373
N-alpha-acetyltransferase 10;N-alpha-acetyltransferase 11	Naa10;Naa11	0.451432	0.00479314	0.684338	0.000852925
Ankyrin repeat domain-containing protein 17	Ankrd17	0.809024	0.000725197	0.684096	0.00126305
Constitutive coactivator of PPAR-gamma-like protein 1	FAM120A	0.645883	0.000802759	0.683322	0.00170219
Acyl-coenzyme A thioesterase 9, mitochondrial;Acyl-coenzyme A thioesterase 10, mitochondrial	Acot9;Acot10	0.38576	0.0326727	0.683244	0.000967415
	Spryd3	-0.534119	0.198635	0.683107	0.291983
CCA tRNA nucleotidyltransferase 1, mitochondrial	Trnt1	0.542195	0.00291029	0.68091	0.000964426
Kelch-like ECH-associated protein 1	Keap1	0.140619	0.473024	0.679437	0.0620251
Ras-related protein Rab-5C	Rab5c	0.57	0.0543694	0.679014	0.0497376
Signal-transducing adaptor protein 1	Stap1	0.481198	0.00683777	0.676302	0.00672379
4-trimethylaminobutyraldehyde dehydrogenase	Aldh9a1	0.152762	0.559276	0.674593	0.0124905
Regulator of nonsense transcripts 1	Upf1	1.06041	0.000137054	0.673964	0.00307492
Inhibitor of nuclear factor kappa-B kinase subunit epsilon	Ikbke	0.574254	0.00314756	0.673689	0.00567496
Guanine nucleotide-binding protein-like 3	Gnl3	0.111107	0.456378	0.672349	0.00329075
RNA-binding protein 39	Rbm39	-0.00324793	0.976259	0.670264	0.0170721
5-3 exoribonuclease 1	Xrn1	1.12757	0.000204693	0.668265	0.00150527
60S ribosomal protein L37a	Rpl37a	0.519474	0.00346518	0.667696	0.00186493
60S ribosomal protein L36a	Rpl36a	0.437308	0.00777773	0.664596	0.0015703
C-1-tetrahydrofolate synthase, cytoplasmic;Methylenetetrahydrofolate dehydrogenase;Methenyltetrahydrofolate cyclohydrolase;Formyltetrahydrofolate synthetase;C-1-tetrahydrofolate synthase, cytoplasmic, N-terminally processed	Mthfd1	0.471484	0.00754635	0.663185	0.00132516
ELAV-like protein 1	Elavl1	0.618146	0.00151886	0.661973	0.00204304
Synaptic vesicle membrane protein VAT-1 homolog	Vat1	0.242477	0.71823	0.660243	0.181838
Probable ATP-dependent RNA helicase DDX6	Ddx6	1.2782	0.000332129	0.659725	0.00323732
Sideroflexin-1	Sfxn1	0.509848	0.0123555	0.658977	0.00466864
COMM domain-containing protein 4	Commd4	0.575777	0.00863583	0.658652	0.0107375
Histone H1.4	Hist1h1e	-1.21465	0.00235536	0.655559	0.244086
Vimentin	Vim	0.076736	0.706687	0.653614	0.0843722
Junction plakoglobin	Jup	0.405709	0.628458	0.652406	0.414183
Hypoxia up-regulated protein 1	Hyou1	0.711724	0.00090118	0.650378	0.00126682
G-protein coupled receptor 84	Gpr84	0.919386	0.0372016	0.647884	0.0529433
Mitochondrial dicarboxylate carrier	Slc25a10	0.551245	0.0158849	0.646246	0.0033702
60S ribosomal protein L18	Rpl18	0.150436	0.238803	0.646227	0.0830528
Heterogeneous nuclear ribonucleoprotein D0	Hnrnpd	1.10806	0.00114929	0.645795	0.00131022
Katanin p60 ATPase-containing subunit A1	Katna1	0.351101	0.447798	0.644986	0.0552402
La-related protein 4B	Larp4b	0.335677	0.102754	0.644636	0.0333282
Tubulin gamma-1 chain;Tubulin gamma-2 chain	Tubg1;Tubg2	0.689392	0.00151886	0.644092	0.00122404
Enoyl-CoA delta isomerase 1, mitochondrial	Eci1	0.757782	0.000549329	0.641249	0.0104484
ATP-dependent RNA helicase DDX54	Ddx54	0.387181	0.0372016	0.640734	0.00185944
Cytochrome b-c1 complex subunit 8	Uqcrq	0.335129	0.0161858	0.640701	0.00295629
N-alpha-acetyltransferase 25, NatB auxiliary subunit	Naa25	-0.106251	0.712096	0.639471	0.236482
Probable arginine--tRNA ligase, mitochondrial	Rars2	0.566772	0.00930106	0.639138	0.0204715
Serine/threonine-protein kinase RIO2	Riok2	0.170206	0.28304	0.638906	0.00109104
Multiple myeloma tumor-associated protein 2 homolog	Mmtag2	-0.147296	0.321018	0.637321	0.0248147
NADH dehydrogenase [ubiquinone] 1 alpha subcomplex subunit 9, mitochondrial	Ndufa9	0.330346	0.113318	0.635603	0.00374339
Ubiquitin-conjugating enzyme E2 N	Ube2n	0.425303	0.0234379	0.634234	0.0503157
RNA-binding protein PNO1	Pno1	0.258942	0.301935	0.633276	0.0351634
Dihydrolipoyl dehydrogenase, mitochondrial	Dld	0.419826	0.0339359	0.633258	0.00826592
60S ribosomal protein L35a	Rpl35a	-0.106126	0.461384	0.631338	0.127826
	Zc3h7a	0.353154	0.0321594	0.630339	0.0346033
Protein PRRC2B	Prrc2b	0.650753	0.00798666	0.630231	0.0755529
Spermidine synthase	Srm	0.493934	0.171172	0.628638	0.212712
Tricarboxylate transport protein, mitochondrial	Slc25a1	0.643639	0.00296363	0.627742	0.00452534
Casein kinase I isoform delta;Casein kinase I isoform epsilon	Csnk1d;Csnk1e	0.283273	0.141397	0.627195	0.0158407
ADP/ATP translocase 2;ADP/ATP translocase 2, N-terminally processed	Slc25a5	0.54945	0.00229524	0.62711	0.0225296
Tubulin beta-6 chain	Tubb6	0.733867	0.0160031	0.626673	0.00401031
Cytochrome b-c1 complex subunit Rieske, mitochondrial;Cytochrome b-c1 complex subunit 11	Uqcrfs1	0.555767	0.00924372	0.625791	0.00754998
	Uvrag	0.518384	0.00393541	0.625613	0.173304
Choline/ethanolaminephosphotransferase 1	Cept1	0.249764	0.0815317	0.624585	0.00516512
ADP-ribosylation factor 6	Arf6	0.884542	0.0242222	0.624535	0.0258532
40S ribosomal protein S23	Rps23	0.611508	0.00428329	0.623799	0.00131525
2-5-oligoadenylate synthase-like protein 1	Oasl1	0.0508787	0.618438	0.623445	0.0329202
60S ribosomal protein L26	Rpl26	0.55452	0.00280488	0.620943	0.00269433
Sphingolipid delta(4)-desaturase DES1	Degs1	0.768924	0.00722542	0.619078	0.0395588
Integrator complex subunit 11	Cpsf3l	0.546221	0.148878	0.617346	0.0486629
Transducin beta-like protein 3	Tbl3	0.778822	0.0415108	0.616279	0.0131625
Mitochondrial 10-formyltetrahydrofolate dehydrogenase	Aldh1l2	0.323813	0.11297	0.616041	0.0492124
ES1 protein homolog, mitochondrial	D10Jhu81e	0.54097	0.0150698	0.614238	0.0139446
Exportin-4	Xpo4	-0.820458	0.431603	0.613225	0.205327
60S ribosomal protein L11	Gm10036;Rpl11	0.510842	0.0020438	0.612375	0.00260659
Pyrroline-5-carboxylate reductase 2	Pycr2	0.38747	0.031659	0.610587	0.00113105
Surfeit locus protein 4	Surf4	0.251161	0.272321	0.609146	0.163468
Mitochondrial import receptor subunit TOM22 homolog	Tomm22	0.533693	0.00431368	0.608982	0.015453
Ubiquitin-40S ribosomal protein S27a;Ubiquitin;40S ribosomal protein S27a	Rps27a	0.0282249	0.930988	0.607878	0.0301902
Short/branched chain specific acyl-CoA dehydrogenase, mitochondrial	Acadsb	0.757461	0.0036197	0.605194	0.0487582
ADP-ribosylation factor 5	Arf5	0.326087	0.0388402	0.603688	0.00413605
60S ribosomal protein L13a	Rpl13a	0.46979	0.00605313	0.602888	0.00122445
Dolichyl-diphosphooligosaccharide--protein glycosyltransferase subunit 2	Rpn2	0.617641	0.00534754	0.60228	0.00362334
Mitochondrial-processing peptidase subunit alpha	Pmpca	0.217115	0.791554	0.602128	0.128499
OTU domain-containing protein 4	Otud4	0.314692	0.0520921	0.602033	0.00141828
Biliverdin reductase A	Blvra	0.561085	0.00139283	0.601281	0.00289756
Transcriptional activator protein Pur-alpha	Pura	0.608996	0.00524025	0.600862	0.0066474
Poly(A) RNA polymerase, mitochondrial	Mtpap	0.538824	0.023844	0.597914	0.00739017
Galactokinase	Galk1	0.297143	0.0664512	0.596432	0.00114528
RNA-binding protein EWS	Ewsr1	0.273206	0.346456	0.595436	0.613253
Double-stranded RNA-binding protein Staufen homolog 1	Stau1	0.452428	0.0115919	0.595054	0.00575985
Mitochondrial glutamate carrier 1	Slc25a22	2.19939	0.0640395	0.594174	0.00456437
Nuclear pore complex protein Nup155	Nup155	0.249105	0.0677895	0.593279	0.0270341
DCC-interacting protein 13-alpha	Appl1	1.18057	0.298158	0.592475	0.0181307
Ras association domain-containing protein 2	Rassf2	0.472392	0.00295533	0.592365	0.00261483
ATP synthase subunit gamma;ATP synthase subunit gamma, mitochondrial	Atp5c1	0.413165	0.0037726	0.591904	0.00445742
ATP-dependent 6-phosphofructokinase, liver type	Pfkl	0.460736	0.00342941	0.591804	0.00610748
Dolichyl-diphosphooligosaccharide--protein glycosyltransferase subunit STT3A	Stt3a	0.457475	0.00448378	0.589238	0.00511615
PAB-dependent poly(A)-specific ribonuclease subunit PAN3	Pan3	1.61341	0.00463831	0.58887	0.0441586
ADP/ATP translocase 1	Slc25a4	0.448642	0.00399671	0.586745	0.00583932
Phenylalanine--tRNA ligase beta subunit	Farsb	0.325414	0.558692	0.584089	0.00736526
Peroxiredoxin-1	Prdx1	0.542794	0.00455749	0.583733	0.0139663
Muscleblind-like protein 2	Mbnl2	2.08758	0.00436545	0.582614	0.206604
	2210016F16Rik	0.49657	0.00420291	0.5824	0.00550019
ATP synthase subunit O, mitochondrial	Atp5o	0.568993	0.0104266	0.581925	0.006224
Putative ATP-dependent RNA helicase DHX30	Dhx30	0.451358	0.0180454	0.581844	0.00830974
PCI domain-containing protein 2	Pcid2	0.460414	0.00493871	0.581435	0.00896152
Polycomb protein Suz12	Suz12	0.169334	0.251578	0.581404	0.0129224
ATP-dependent RNA helicase DDX39A	Ddx39a;Ddx39	0.454957	0.003702	0.579903	0.0029885
SUMO-activating enzyme subunit 1;SUMO-activating enzyme subunit 1, N-terminally processed	Sae1	0.348227	0.0265386	0.577664	0.0047646
Cytochrome b-c1 complex subunit 2, mitochondrial	Uqcrc2	0.600442	0.000973303	0.577631	0.00368545
Zinc finger CCCH-type antiviral protein 1	Zc3hav1	0.446974	0.00380497	0.576666	0.00239667
Threonine--tRNA ligase, mitochondrial	Tars2	-0.187497	0.774799	0.576354	0.028705
60S ribosomal protein L21	Rpl21	0.479054	0.00324695	0.576221	0.0249122
Endoplasmic reticulum aminopeptidase 1	Erap1	0.495977	0.00341243	0.575962	0.00456437
Interferon-induced, double-stranded RNA-activated protein kinase	Eif2ak2	0.399805	0.0930164	0.575365	0.00219574
Endoplasmin	Hsp90b1	0.687558	0.00249665	0.574918	0.00848668
Tyrosine-protein kinase;Tyrosine-protein kinase JAK1	Jak1	0.5731	0.0287099	0.574905	0.0113291
Calcium-binding mitochondrial carrier protein Aralar2	Slc25a13	0.569028	0.00452338	0.574585	0.00262436
Rabankyrin-5	Ankfy1	0.170984	0.325304	0.571904	0.00831314
Cyclin-dependent-like kinase 5	Cdk5	0.581603	0.0326592	0.571753	0.00988736
Tubulin alpha-4A chain	Tuba4a	0.366752	0.0401962	0.570778	0.00267095
Guanine nucleotide-binding protein subunit alpha-13	Gna13	0.61521	0.0344537	0.570591	0.00366768
26S proteasome non-ATPase regulatory subunit 3	Psmd3	0.417146	0.0051793	0.570228	0.00537428
Heterogeneous nuclear ribonucleoprotein A/B	Hnrnpab	0.237849	0.281551	0.569801	0.016296
DNA mismatch repair protein Msh2	Msh2	0.357989	0.0248048	0.56919	0.00231309
Long-chain-fatty-acid--CoA ligase 3	Acsl3	0.408124	0.125873	0.567577	0.0285894
40S ribosomal protein S27	Rps27	0.420828	0.00812162	0.56634	0.00367386
V-type proton ATPase subunit a	Tcirg1	-0.181983	0.612939	0.566153	0.0305948
Activator of 90 kDa heat shock protein ATPase homolog 2	Ahsa2	0.387113	0.690733	0.566088	0.0142006
RNA 3-terminal phosphate cyclase	RtcA;Rtca	0.758889	0.00220231	0.565985	0.0389735
Double-stranded RNA-specific adenosine deaminase	Adar	0.651241	0.00199359	0.565597	0.00240878
TNF receptor-associated factor 1	Traf1	1.08224	0.030805	0.565263	0.0759891
Programmed cell death 6-interacting protein	Pdcd6ip	0.437963	0.0130014	0.565155	0.00362334
Cytochrome c oxidase subunit 2	Mtco2	0.874612	0.170514	0.563593	0.0891398
Heterogeneous nuclear ribonucleoprotein L-like	Hnrnpll	-0.130726	0.321665	0.561812	0.0148278
V-type proton ATPase subunit H	Atp6v1h	0.388384	0.0205295	0.560276	0.00848951
DNA topoisomerase 2-alpha	Top2a	-1.33655	0.0867276	0.559988	0.216796
Sorting nexin-10	Snx10	0.23171	0.595704	0.558975	0.172402
ATP synthase subunit g, mitochondrial	Atp5l	1.53632	0.130048	0.558782	0.251513
Heat shock protein 105 kDa	Hsph1	0.312616	0.0220217	0.558449	0.00179788
N-alpha-acetyltransferase 40	Naa40	0.251811	0.204151	0.558348	0.0697347
CDP-diacylglycerol--inositol 3-phosphatidyltransferase	Cdipt	0.483482	0.0304036	0.557715	0.0103081
Pachytene checkpoint protein 2 homolog	Trip13	0.729769	0.0456253	0.557479	0.0163482
Protein kinase C delta type;Protein kinase C delta type regulatory subunit;Protein kinase C delta type catalytic subunit;Protein kinase C	Prkcd	0.529623	0.00754635	0.557106	0.0490226
Staphylococcal nuclease domain-containing protein 1	Snd1	0.222445	0.0395516	0.556986	0.164968
Eukaryotic translation initiation factor 3 subunit J-A;Eukaryotic translation initiation factor 3 subunit J-B	Eif3j1;Eif3j2	-1.61735	0.0753778	0.555625	0.249598
Cathepsin B;Cathepsin B light chain;Cathepsin B heavy chain	Ctsb	0.393193	0.0744971	0.55547	0.0571939
Very-long-chain enoyl-CoA reductase	Tecr	0.349224	0.00904722	0.553938	0.00562511
Mitochondrial 2-oxoglutarate/malate carrier protein	Slc25a11	0.577845	0.0010377	0.553816	0.00327226
Exosome complex exonuclease RRP44	Dis3	0.407152	0.01814	0.553631	0.00673758
Transmembrane 9 superfamily member 3	Tm9sf3	0.180147	0.209421	0.553148	0.00324879
Dolichol-phosphate mannosyltransferase subunit 1	Dpm1	0.450321	0.0365426	0.552219	0.00874965
Translation initiation factor eIF-2B subunit delta	Eif2b4	0.379058	0.0368642	0.552121	0.006224
H-2 class I histocompatibility antigen, L-D alpha chain;H-2 class I histocompatibility antigen, D-B alpha chain	H2-L;H2-D1	0.464181	0.0224113	0.550895	0.0175059
Activator of 90 kDa heat shock protein ATPase homolog 1	Ahsa1	0.515181	0.00759716	0.549961	0.00960577
Carbonyl reductase family member 4	Cbr4	-0.186664	0.84938	0.549513	0.00516512
Thioredoxin-like protein 1	Txnl1	1.34609	0.00486171	0.549242	0.0622534
Probable ATP-dependent RNA helicase DDX17	Ddx17	0.33258	0.0364728	0.547107	0.00637591
60S ribosomal protein L28	Rpl28	0.369189	0.00523142	0.546705	0.0831189
SH2B adapter protein 3	Sh2b3	1.98565	0.0175359	0.546053	0.0668001
40S ribosomal protein S12	Rps12	0.478874	0.0098162	0.544975	0.0136879
ATP-dependent RNA helicase DDX1	Ddx1	0.326566	0.120388	0.544262	0.016952
Protein FAM193A	Fam193a	0.365955	0.0098492	0.543253	0.00341538
Long-chain-fatty-acid--CoA ligase 4	Acsl4	-0.146227	0.693115	0.543054	0.012859
DEP domain-containing protein 7	Depdc7	1.15542	0.000117685	0.542868	0.00735891
SUMO-activating enzyme subunit 2	Uba2	0.496562	0.023792	0.542347	0.0234454
60S ribosomal protein L27a	Rpl27a	0.344031	0.0186277	0.540935	0.0160025
Protein FAM98A	Fam98a	0.47202	0.0113447	0.53959	0.0140093
Ribose-phosphate pyrophosphokinase 2	Prps2	0.765245	0.00924284	0.539137	0.0331241
Calcium-binding mitochondrial carrier protein Aralar1	Slc25a12	0.703695	0.00217198	0.538148	0.00375689
Protein HEXIM1	Hexim1	-4.0562	0.000841082	0.538131	0.236319
60S ribosomal protein L18a	Rpl18a	0.5374	0.00139283	0.536984	0.0725262
Ras-related protein Rab-21	Rab21	0.453969	0.0134681	0.536969	0.00606742
Clathrin heavy chain;Clathrin heavy chain 1	Cltc	0.630224	0.120388	0.536787	0.0386296
Propionyl-CoA carboxylase beta chain, mitochondrial	Pccb	0.423619	0.0101932	0.536339	0.0316384
Lysosomal alpha-glucosidase	Gaa	0.881092	0.0262243	0.536182	0.0548501
Solute carrier family 2, facilitated glucose transporter member 1	Slc2a1	0.213743	0.226694	0.53616	0.00347535
cAMP-dependent protein kinase catalytic subunit alpha	Prkaca	0.588634	0.0036197	0.536101	0.00714301
La-related protein 4	Larp4	0.525257	0.00377955	0.533661	0.00456053
40S ribosomal protein S16	Rps16	0.456989	0.00772666	0.533039	0.0392084
Nicotinamide phosphoribosyltransferase	Nampt	0.378882	0.00863996	0.532594	0.00788708
Very-long-chain (3R)-3-hydroxyacyl-CoA dehydratase 3	Hacd3	0.49285	0.111261	0.530821	0.181588
Mitochondrial pyruvate carrier 2	Mpc2	0.682018	0.0415265	0.530565	0.0251538
Unconventional myosin-Ic	Myo1c	0.421355	0.0344605	0.53054	0.00340484
Transmembrane protein 131	Tmem131	0.622758	0.036397	0.530023	0.0325394
Dolichyl-phosphate beta-glucosyltransferase	Alg5	0.229832	0.053399	0.529807	0.0108135
Protein misato homolog 1	Msto1	0.425664	0.00416181	0.529587	0.00401031
Interferon-induced very large GTPase 1	Gvin1	3.63618	0.000204371	0.528254	0.0507781
Glycogen synthase kinase-3 alpha	Gsk3a	0.412444	0.0153431	0.527071	0.0558847
Nicalin	Ncln	0.350306	0.192977	0.526753	0.0331919
AP-3 complex subunit sigma-1	Ap3s1	0.458735	0.0300113	0.523773	0.0661203
60S ribosomal protein L31	Rpl31	0.489776	0.0120718	0.522956	0.00384291
Polyphosphoinositide phosphatase	Fig4	0.399747	0.0727985	0.522778	0.0219651
DnaJ homolog subfamily A member 2	Dnaja2	0.247155	0.115341	0.520357	0.046526
Inosine triphosphate pyrophosphatase	Itpa	0.480862	0.010626	0.519732	0.0260295
Importin-4	Ipo4	0.141625	0.579516	0.519376	0.0312229
AP-1 complex subunit gamma-1	Ap1g1	0.317875	0.276143	0.518969	0.0705421
Very-long-chain (3R)-3-hydroxyacyl-CoA dehydratase 2	Hacd2	0.0229008	0.856961	0.51857	0.030145
Dual specificity mitogen-activated protein kinase kinase 1	Map2k1	0.360083	0.0292265	0.518126	0.00977894
ATP-dependent RNA helicase DDX3Y	Ddx3y	0.547322	0.00110184	0.517183	0.00335124
Integrin-linked protein kinase	Ilk	0.323102	0.228694	0.516862	0.00288783
Atlastin-3	Atl3	0.336726	0.0401962	0.515184	0.00233693
60S ribosomal protein L13	Rpl13	0.44148	0.00525577	0.513486	0.00626689
Ribosome biogenesis protein BRX1 homolog	Brix1	0.0459966	0.771403	0.512789	0.0551434
Cysteine and histidine-rich domain-containing protein 1	Chordc1	0.213022	0.367309	0.512618	0.027516
N-acetylgalactosamine kinase	Galk2	0.853955	0.00466896	0.512184	0.0433036
	Spcs3	0.504352	0.154572	0.512016	0.0235495
Erlin-1	Erlin1	0.433964	0.0211133	0.511872	0.0477793
60S ribosomal protein L17	Rpl17	0.461885	0.00500032	0.509559	0.00562511
	Serpinb6b	1.89917	0.101999	0.50924	0.591044
60S ribosomal protein L15	Rpl15	0.407972	0.0326727	0.509238	0.0221852
Major vault protein	Mvp	-0.514589	0.341349	0.508784	0.339553
U4/U6.U5 small nuclear ribonucleoprotein 27 kDa protein	Snrnp27	0.363096	0.714641	0.508498	0.151314
DNA replication ATP-dependent helicase/nuclease DNA2;DNA replication nuclease DNA2;DNA replication ATP-dependent helicase DNA2	Dna2	0.300475	0.693115	0.508348	0.637136
ATP-dependent RNA helicase DDX19A	Ddx19a	0.392129	0.00766411	0.508059	0.00307492
Transmembrane protein 33	Tmem33	0.358633	0.111859	0.50755	0.00310231
Dual specificity mitogen-activated protein kinase kinase 2	Map2k2	0.042022	0.831659	0.505918	0.0329202
Protein transport protein Sec24A	Sec24a	0.288726	0.0753778	0.505592	0.0131182
Pyruvate kinase PKM	Pkm	0.86265	0.0205886	0.505023	0.181224
DNA replication licensing factor MCM7	Mcm7	0.547785	0.00147049	0.504989	0.00611663
UPF0568 protein C14orf166 homolog		0.591776	0.00113011	0.503806	0.0206317
Polypyrimidine tract-binding protein 1	Ptbp1	0.0459145	0.66786	0.503218	0.00568102
T-complex protein 1 subunit zeta	Cct6a	0.128848	0.34707	0.503174	0.00659046
Lysosomal acid lipase/cholesteryl ester hydrolase	Lipa	0.445501	0.0231119	0.503148	0.200206
Eukaryotic initiation factor 4A-I;Eukaryotic initiation factor 4A-II;Eukaryotic initiation factor 4A-II, N-terminally processed	Eif4a1;Eif4a2	0.505174	0.00203204	0.501585	0.00736526
Ras association domain-containing protein 4	Rassf4	0.301082	0.0151203	0.501557	0.0163482
60S ribosomal protein L24	Rpl24	0.644801	0.00138667	0.501425	0.0258104
Activating signal cointegrator 1 complex subunit 2	Ascc2	-0.53472	0.0738777	0.500559	0.14384
Poly(rC)-binding protein 2;Poly(rC)-binding protein 3	Pcbp2;Pcbp3	0.604662	0.00391809	0.500437	0.00743987
Dynein light chain Tctex-type 1	Dynlt1	0.401221	0.0304036	0.499391	0.0279418
Ubiquitin-like modifier-activating enzyme ATG7	Atg7	0.612802	0.0596876	0.499341	0.0664267
C-terminal-binding protein 2	Ctbp2	0.32732	0.0353968	0.497622	0.00248105
40S ribosomal protein S14	Rps14	0.556869	0.00145972	0.497349	0.0114451
40S ribosomal protein S3	Rps3	0.551205	0.00291911	0.497103	0.0199825
MAP kinase-activated protein kinase 2	Mapkapk2	0.350109	0.192977	0.496822	0.00388003
RNA-binding protein 14	Rbm14	0.456319	0.0036197	0.496188	0.00621183
Prohibitin-2	Phb2	0.530951	0.001604	0.494634	0.0199092
Zinc finger SWIM domain-containing protein 8	Zswim8	0.243922	0.274964	0.494216	0.470121
tRNA (cytosine(34)-C(5))-methyltransferase	Nsun2	0.429488	0.0179951	0.494113	0.00375037
Structural maintenance of chromosomes protein 2	Smc2	0.413865	0.0188293	0.493276	0.00464965
Ras GTPase-activating-like protein IQGAP1	Iqgap1	0.583788	0.00245118	0.493263	0.00940824
ADP-ribosylation factor 4	Arf4	0.510076	0.0139755	0.492489	0.00488375
Translation initiation factor eIF-2B subunit alpha	Eif2b1	0.340369	0.0315006	0.492175	0.0157333
40S ribosomal protein S2	Rps2;Gm8225	0.460397	0.0213162	0.49212	0.029669
Prelamin-A/C;Lamin-A/C	Lmna	0.448004	0.0109828	0.491941	0.00426286
60S ribosomal protein L23a	Rpl23a	0.175002	0.073544	0.491924	0.0118924
Chloride intracellular channel protein 4	Clic4	0.274779	0.0355577	0.491156	0.00957595
[Protein ADP-ribosylarginine] hydrolase	Adprh	0.224783	0.331427	0.491022	0.0693039
Guanine nucleotide-binding protein subunit beta-2-like 1;Guanine nucleotide-binding protein subunit beta-2-like 1, N-terminally processed	Gnb2l1	0.499052	0.00366894	0.490405	0.0511442
Cathepsin D	Ctsd	0.594427	0.0105908	0.490109	0.344241
60S ribosomal export protein NMD3	Nmd3	0.582234	0.00503234	0.490013	0.00795303
Tyrosine-protein phosphatase non-receptor type 2;Tyrosine-protein phosphatase non-receptor type	Ptpn2	0.367621	0.0554869	0.489719	0.0363523
Monocarboxylate transporter 1	Slc16a1	0.245006	0.166081	0.488108	0.00473015
Peroxiredoxin-2	Prdx2	0.96536	0.00326177	0.488099	0.012216
60S ribosomal protein L23	Rpl23	0.809225	0.00708753	0.485123	0.0201322
GPI-anchor transamidase	Pigk	0.382822	0.0118742	0.48494	0.0131182
Tyrosine-protein kinase;Tyrosine-protein kinase SYK	Syk	0.281805	0.108391	0.484414	0.00401031
Ras-related C3 botulinum toxin substrate 2;Ras-related C3 botulinum toxin substrate 1	Rac2;Rac1	0.32243	0.0270726	0.484171	0.00841844
2-5-oligoadenylate synthase 1A	Oas1a;Oas1g	0.549898	0.00557286	0.482388	0.00539505
Cullin-associated NEDD8-dissociated protein 1	Cand1	0.391455	0.0172678	0.482373	0.00818241
Leucine-rich repeat-containing protein 40	Lrrc40	0.303955	0.0280038	0.478322	0.00858323
40S ribosomal protein S4, X isoform;40S ribosomal protein S4	Rps4x;Gm15013	0.463769	0.00841781	0.477448	0.00476676
NEDD8 ultimate buster 1	Nub1	0.393291	0.0189061	0.474189	0.00710352
Proteasomal ubiquitin receptor ADRM1	Gm9774;Adrm1	0.0793096	0.960049	0.474049	0.00807888
Rho GTPase-activating protein 10	Arhgap10	0.0691838	0.682758	0.473886	0.0554025
AP-1 complex subunit sigma-1A	Ap1s1	0.313477	0.200959	0.473434	0.0406935
40S ribosomal protein S11	Rps11	0.440272	0.00319774	0.472958	0.0024377
ATP synthase subunit beta, mitochondrial	Atp5b	0.57954	0.00159664	0.472624	0.0148391
NADH dehydrogenase [ubiquinone] flavoprotein 1, mitochondrial	Ndufv1	0.625761	0.00302908	0.472577	0.0279418
Programmed cell death protein 6	Pdcd6	0.924172	0.000495907	0.472252	0.11423
ATP synthase subunit alpha, mitochondrial;ATP synthase subunit alpha	Atp5a1	0.6637	0.00195313	0.471394	0.11472
DNA replication licensing factor MCM2	Mcm2	0.443329	0.00904722	0.470399	0.00270175
AP-3 complex subunit mu-1	Ap3m1	0.429414	0.00390941	0.46921	0.00848951
Caspase-1;Caspase-1 subunit p20;Caspase-1 subunit p10	Casp1	-0.469967	0.705492	0.469049	0.099529
Cofilin-1	Cfl1	0.399767	0.0104266	0.469018	0.0225296
40S ribosomal protein S9	Rps9	0.56173	0.0047618	0.468514	0.0031314
4F2 cell-surface antigen heavy chain	Slc3a2	0.214473	0.2667	0.468359	0.0765376
Phosphate carrier protein, mitochondrial	Slc25a3	0.790982	0.0611181	0.466946	0.0156698
Signal transducer and activator of transcription;Signal transducer and activator of transcription 1	Stat1	0.535123	0.00812162	0.466624	0.00600508
Tryptophan--tRNA ligase, cytoplasmic;T1-TrpRS;T2-TrpRS	Wars	0.466728	0.010544	0.465181	0.0598431
ATP-dependent RNA helicase DDX3X;Putative ATP-dependent RNA helicase Pl10	Ddx3x;D1Pas1	0.335612	0.0198397	0.46493	0.0116049
Protein zwilch homolog	Zwilch	0.387879	0.078543	0.464277	0.0331919
Cytochrome b-c1 complex subunit 9	Uqcr10	0.62466	0.189047	0.462853	0.00538142
Cytochrome c oxidase subunit NDUFA4	Ndufa4	0.511326	0.0974533	0.462225	0.0246063
Eukaryotic translation initiation factor 3 subunit F	Eif3f	-0.0787671	0.552321	0.461552	0.00973761
ADP-ribosylation factor 1;ADP-ribosylation factor 3	Arf1;Arf3	0.224721	0.0951844	0.461211	0.184118
Protein jagunal homolog 1	Jagn1	-0.940745	0.491501	0.461109	0.0253973
Importin-5	Ipo5	0.303626	0.0638193	0.461029	0.00960577
	Sec24c	0.283601	0.118129	0.46019	0.00511615
Prohibitin	Phb	0.509914	0.0030294	0.460041	0.0424597
Leucine-rich repeat-containing protein 58	Lrrc58	0.369815	0.0421944	0.459703	0.00602759
Probable ATP-dependent RNA helicase DDX47	Ddx47	0.486724	0.0147764	0.459103	0.0328651
Methylthioribose-1-phosphate isomerase	Mri1	0.439019	0.0108658	0.458933	0.0140385
Ubiquitin-conjugating enzyme E2 variant 1;Ubiquitin-conjugating enzyme E2 variant 2	Ube2v1;Gm20431;Ube2v2	0.359031	0.0219299	0.458812	0.00705487
Proliferating cell nuclear antigen	Pcna	0.537129	0.00348321	0.457496	0.0155422
ADP-ribosylation factor-like protein 1	Arl1	0.401601	0.0262243	0.45668	0.0214034
Very-long-chain 3-oxoacyl-CoA reductase	Hsd17b12	0.489504	0.00522397	0.456443	0.00876504
Hydroxymethylglutaryl-CoA synthase, cytoplasmic	Hmgcs1	0.677273	0.00335175	0.456325	0.0270781
WD repeat-containing protein 18	Wdr18	-0.763594	0.243781	0.456248	0.147484
Mitochondrial import inner membrane translocase subunit TIM50	Timm50	0.413429	0.0207583	0.45609	0.0232246
Tripeptidyl-peptidase 2	Tpp2	0.505315	0.00966576	0.455728	0.0283122
Apoptosis-inducing factor 1, mitochondrial	Aifm1	0.204959	0.171262	0.455535	0.0615837
Vacuolar protein sorting-associated protein 18 homolog	Vps18	0.265209	0.23007	0.45426	0.0383095
DNA repair protein RAD50	Rad50	0.349155	0.0366326	0.453619	0.00757333
Interferon-related developmental regulator 1	Ifrd1	0.187216	0.192038	0.452574	0.00537428
GTP-binding protein 1	Gtpbp1	0.364482	0.0257207	0.451317	0.0329202
Receptor-interacting serine/threonine-protein kinase 1	Ripk1	0.342696	0.0172072	0.451005	0.0206208
Aurora kinase A	Aurka	0.55542	0.00327519	0.449841	0.0489827
Destrin	Dstn	0.475646	0.0366326	0.449838	0.00600508
Structural maintenance of chromosomes protein 4;Structural maintenance of chromosomes protein	Smc4	0.308461	0.0280038	0.44983	0.00736526
Nucleolar RNA helicase 2	Ddx21	0.191223	0.193833	0.449716	0.004793
Nuclear pore complex protein Nup85	Nup85	0.064768	0.838504	0.449712	0.148725
ATP-dependent RNA helicase A	Dhx9	0.314338	0.0867352	0.44968	0.0166653
Heterogeneous nuclear ribonucleoprotein H;Heterogeneous nuclear ribonucleoprotein H, N-terminally processed	Hnrnph1	0.444697	0.0115841	0.449525	0.00991714
Cytosolic Fe-S cluster assembly factor NUBP2	Nubp2	1.63403	0.152964	0.449375	0.0414073
Ras GTPase-activating protein 4	Rasa4	-0.0812967	0.870723	0.449188	0.0668001
ATP-binding cassette sub-family F member 2	Abcf2	0.303319	0.0194861	0.448628	0.0115355
Proteasome assembly chaperone 4	Psmg4	-0.855547	0.189084	0.447989	0.205871
Ataxin-2-like protein	Atxn2l	0.466149	0.00259978	0.4478	0.00518505
ADP-ribosylation factor-binding protein GGA2	Gga2	0.583901	0.0255211	0.447492	0.0450592
FAS-associated factor 1	Faf1	-0.00570052	0.995576	0.447037	0.249159
40S ribosomal protein S15a	Rps15a	0.654603	0.00535653	0.446808	0.0279611
Serine palmitoyltransferase 2	Sptlc2	0.241289	0.223507	0.445989	0.0122901
	Rbm15	0.285885	0.0839419	0.445926	0.0243575
Coatomer subunit beta	Copb1	0.30817	0.0308082	0.445823	0.0223422
YTH domain-containing protein 1	Ythdc1	0.30761	0.136581	0.445732	0.0209553
Serrate RNA effector molecule homolog	Srrt	0.035561	0.786107	0.445461	0.0315158
Proteasome-associated protein ECM29 homolog	Ecm29;AI314180	1.17119	0.000136218	0.444817	0.00590296
Ancient ubiquitous protein 1	Aup1	0.4038	0.0868755	0.443732	0.00492849
ADP-ribosylation factor-like protein 2	Arl2	0.628993	0.00455749	0.443335	0.0183994
CAD protein;Glutamine-dependent carbamoyl-phosphate synthase;Aspartate carbamoyltransferase;Dihydroorotase	Cad	0.445352	0.00786599	0.442849	0.0120479
Centrosomal protein of 55 kDa	Cep55	1.02093	0.000268605	0.440959	0.00889709
Pyruvate kinase PKM	Pkm	0.476687	0.0076088	0.440828	0.0484225
Cytochrome b-245 heavy chain	Cybb	0.383457	0.00693189	0.440069	0.0112578
Aspartate aminotransferase, mitochondrial	Got2	-0.675821	0.0305465	0.439701	0.210889
Proteasome assembly chaperone 3	Psmg3;Gm26938	0.38975	0.0476892	0.439287	0.00803745
Glyceraldehyde-3-phosphate dehydrogenase	Gapdh;Gm3839	0.512139	0.0174804	0.438833	0.0566842
Androgen-induced gene 1 protein	Aig1	0.0327425	0.969964	0.438757	0.223255
Cysteine protease ATG4B	Atg4b	0.149172	0.383999	0.438491	0.0228473
60S ribosomal protein L9	Rpl9	0.4767	0.101078	0.437373	0.0249995
GMP synthase [glutamine-hydrolyzing]	Gmps	0.303931	0.0691642	0.4363	0.0136263
Dynamin-2	Dnm2	0.536389	0.00390941	0.435108	0.00910612
40S ribosomal protein S27-like;40S ribosomal protein S27	Rps27l	0.320688	0.027598	0.434889	0.0209553
Uridine 5-monophosphate synthase;Orotate phosphoribosyltransferase;Orotidine 5-phosphate decarboxylase	Umps	0.435673	0.0219668	0.434689	0.00954246
Tyrosine-protein kinase CSK	Csk	0.217786	0.141096	0.434524	0.00947159
SHC-transforming protein 1	Shc1	0.333112	0.0872728	0.434259	0.0201193
Tubulin alpha-1B chain	Tuba1b	0.484799	0.00241849	0.434233	0.0289508
tRNA-splicing ligase RtcB homolog	Rtcb	0.595701	0.00166034	0.433875	0.0123393
Interferon-induced helicase C domain-containing protein 1	Ifih1	0.979776	0.0010377	0.433455	0.028705
60S ribosomal protein L22	Rpl22	0.740501	0.00292586	0.433404	0.130975
RNA-binding protein NOB1	Nob1	0.590811	0.020538	0.433075	0.0223582
Dolichyl-diphosphooligosaccharide--protein glycosyltransferase subunit STT3B	Stt3b	0.161525	0.249516	0.431944	0.0386296
Farnesyl pyrophosphate synthase	Fdps	0.619803	0.00501415	0.43087	0.00630891
14-3-3 protein gamma;14-3-3 protein gamma, N-terminally processed	Ywhag	0.764473	0.00571264	0.430114	0.0872433
Docking protein 2	Dok2	0.186495	0.123102	0.428042	0.184137
Proto-oncogene vav	Vav1	0.242652	0.0564113	0.427864	0.00667451
Heterogeneous nuclear ribonucleoprotein A0	Hnrnpa0	0.445372	0.00342941	0.426537	0.0503157
Alanine--tRNA ligase, cytoplasmic	Aars	0.986062	0.0371361	0.426367	0.0372066
Transferrin receptor protein 1	Tfrc	0.61388	0.00176821	0.426054	0.0245463
40S ribosomal protein S24	Rps24	0.46088	0.022347	0.425948	0.0229903
ATP-dependent 6-phosphofructokinase;ATP-dependent 6-phosphofructokinase, platelet type	Pfkp	0.47325	0.00462113	0.425855	0.0164245
Sorting nexin-2	Snx2	0.264547	0.0565296	0.425268	0.0115111
	Nckap1l	0.375539	0.029736	0.424344	0.00687142
	Pkp2	0.481849	0.00574652	0.423554	0.00981977
DnaJ homolog subfamily C member 11	Dnajc11	0.511971	0.00336519	0.422911	0.0121939
UBX domain-containing protein 1	Ubxn1	0.0135107	0.962717	0.422656	0.110272
60S ribosomal protein L3	Rpl3	0.386335	0.0147355	0.422613	0.0104675
Presenilins-associated rhomboid-like protein, mitochondrial;P-beta	Parl	0.267243	0.142926	0.42225	0.0142068
Exocyst complex component 4	Exoc4	0.285222	0.0297565	0.421756	0.00583932
N-alpha-acetyltransferase 15, NatA auxiliary subunit	Naa15	0.363686	0.0208414	0.421533	0.03413
ATP synthase mitochondrial F1 complex assembly factor 2	Atpaf2	0.270039	0.0849396	0.421363	0.0424597
Segment polarity protein dishevelled homolog DVL-2	Dvl2	0.333408	0.0280424	0.421177	0.0415546
Mitochondrial import receptor subunit TOM40 homolog	Tomm40	0.534663	0.00309114	0.420755	0.0265815
Voltage-dependent anion-selective channel protein 3	Vdac3	0.549499	0.00161598	0.419897	0.0144077
Serine/threonine-protein phosphatase 2A 55 kDa regulatory subunit B;Serine/threonine-protein phosphatase 2A 55 kDa regulatory subunit B alpha isoform	Ppp2r2a	-0.412903	0.575809	0.419662	0.123917
Hexokinase-3;Hexokinase	Hk3	0.853372	0.000358627	0.418217	0.0109229
Cold shock domain-containing protein E1	Csde1	0.452824	0.00271296	0.417392	0.00818241
Phosphatidylinositol 3-kinase;Phosphatidylinositol 3-kinase catalytic subunit type 3	Pik3c3	0.265475	0.192669	0.417216	0.0725262
Fatty acyl-CoA reductase 1	Far1	0.374467	0.0158849	0.416589	0.0255117
Probable tRNA N6-adenosine threonylcarbamoyltransferase	Osgep	0.382728	0.04324	0.416401	0.0149325
Alcohol dehydrogenase [NADP(+)]	Akr1a1	5.74997	0.000216055	0.415932	0.0215144
	Pi4ka	0.00747526	0.97629	0.415507	0.105019
Dual specificity mitogen-activated protein kinase kinase 3	Map2k3	0.509103	0.0200004	0.414894	0.0054413
26S proteasome non-ATPase regulatory subunit 8	Psmd8	-0.601175	0.386866	0.414733	0.217141
	Cep192	-0.342779	0.026757	0.414606	0.079978
Ribonuclease inhibitor	Rnh1	0.50997	0.00766411	0.414466	0.0229526
1-acyl-sn-glycerol-3-phosphate acyltransferase epsilon	Agpat5	0.420481	0.0727985	0.413729	0.0137172
Toll-like receptor 7	Tlr7	0.523846	0.00578236	0.412847	0.0845352
40S ribosomal protein S10	Rps10	0.307206	0.0238977	0.412713	0.0759891
CTP synthase 1	Ctps1	0.291615	0.0242254	0.412702	0.00626689
Ubiquitin-associated protein 2-like	Ubap2l	-0.105746	0.280571	0.412496	0.011599
Fermitin family homolog 3	Fermt3	0.398381	0.00777773	0.41196	0.00475216
Erlin-2	Erlin2	0.563225	0.00433335	0.41054	0.0279418
DNA replication licensing factor MCM4	Mcm4	0.298377	0.0286974	0.410144	0.00874965
ADP-sugar pyrophosphatase	Nudt5	0.210997	0.121927	0.409207	0.0216354
7-dehydrocholesterol reductase	Dhcr7	0.466872	0.00506003	0.408993	0.0494801
Trifunctional purine biosynthetic protein adenosine-3;Phosphoribosylamine--glycine ligase;Phosphoribosylformylglycinamidine cyclo-ligase;Phosphoribosylglycinamide formyltransferase	Gart	0.332961	0.0249066	0.408897	0.0105772
60S ribosomal protein L10;60S ribosomal protein L10-like	Rpl10;Rpl10l	0.693012	0.0212547	0.408584	0.0944479
Tetratricopeptide repeat protein 27	Ttc27	0.499957	0.0308082	0.40699	0.0754365
60S ribosomal protein L8	Rpl8	0.424823	0.00957689	0.406711	0.0288837
Tudor domain-containing protein 3	Tdrd3	0.852489	0.00768897	0.405773	0.205327
40S ribosomal protein S8	Rps8	0.515181	0.0101207	0.405277	0.0143205
Sterol-4-alpha-carboxylate 3-dehydrogenase, decarboxylating	Nsdhl	0.454017	0.00542661	0.405228	0.00914425
Coatomer subunit delta	Arcn1	0.308848	0.0199698	0.403239	0.0182718
Probable dimethyladenosine transferase	Dimt1	0.530763	0.00445786	0.402568	0.0134162
Ubiquitin carboxyl-terminal hydrolase;Probable ubiquitin carboxyl-terminal hydrolase FAF-X	Usp9x	0.376959	0.0231697	0.401701	0.0235495
ATP-binding cassette sub-family E member 1	Abce1	0.298068	0.0268459	0.40124	0.0278949
Growth hormone-inducible transmembrane protein	Ghitm	0.523331	0.383162	0.400841	0.120776
60S ribosomal protein L6	Rpl6	-0.456138	0.00432448	0.40073	0.233908
DNA replication licensing factor MCM6;DNA helicase	Mcm6	0.374311	0.00697692	0.400323	0.00656536
Exportin-T	Xpot	0.236654	0.118254	0.400321	0.0301322
Glutamate--cysteine ligase regulatory subunit	Gclm	0.559047	0.00653384	0.400263	0.00871698
Kelch-like protein 22	Klhl22	-0.188594	0.828602	0.400117	0.113652
Interferon-inducible protein AIM2	Aim2	0.329776	0.0548839	0.400065	0.00987261
Protein flightless-1 homolog	Flii	0.264399	0.124098	0.399878	0.028705
	Dut	1.1376	0.220534	0.399783	0.00627685
Protein-tyrosine kinase 2-beta	Ptk2b	0.442962	0.00391809	0.398695	0.0147357
MICOS complex subunit Mic25	Chchd6	0.572535	0.0215451	0.397151	0.0129129
Probable cation-transporting ATPase 13A3	Atp13a3	-0.759715	0.459728	0.396586	0.0781659
Translationally-controlled tumor protein	Tpt1	-0.831869	0.33866	0.396228	0.191714
Ribonuclease;Ribonuclease H2 subunit A	Rnaseh2a	-0.298738	0.0649315	0.396218	0.575529
WD repeat-containing protein 6	Wdr6	0.41153	0.015677	0.396011	0.0389735
Ribosomal protein S6 kinase;Ribosomal protein S6 kinase alpha-1	Rps6ka1	0.79392	0.00102105	0.395996	0.0279418
GTP-binding nuclear protein Ran	Ran;1700009N14Rik	0.429719	0.00540139	0.395532	0.056677
Dynamin-like 120 kDa protein, mitochondrial;Dynamin-like 120 kDa protein, form S1	Opa1	0.173009	0.340617	0.395116	0.0368355
60S ribosomal protein L7a	Rpl7a	0.316403	0.0231084	0.394893	0.0184277
60S ribosomal protein L14	Rpl14	0.410881	0.176844	0.394634	0.122738
Sphingomyelin phosphodiesterase 4	Smpd4	0.893049	0.129644	0.394374	0.0895753
ATP synthase F(0) complex subunit B1, mitochondrial	Atp5f1	0.350352	0.0226081	0.394148	0.0614454
	Skiv2l	0.437337	0.00696011	0.393584	0.0983793
LIM and senescent cell antigen-like-containing domain protein 1;LIM and senescent cell antigen-like-containing domain protein 2	Lims1;Lims2	0.394067	0.107213	0.392738	0.0484225
T-complex protein 1 subunit epsilon	Cct5	0.282838	0.013685	0.392429	0.0158404
UPF0183 protein C16orf70 homolog		-2.22786	0.0315365	0.392216	0.75496
Rho guanine nucleotide exchange factor 2	Arhgef2	0.373017	0.00409065	0.39199	0.00977894
Dynein light chain roadblock-type 1	Dynlrb1	0.680951	0.00812162	0.39125	0.0639623
Vacuolar protein sorting-associated protein 52 homolog	Vps52	0.536759	0.00535653	0.390136	0.00659046
Actin, cytoplasmic 1;Actin, cytoplasmic 1, N-terminally processed;Actin, cytoplasmic 2;Actin, cytoplasmic 2, N-terminally processed	Actb;Actg1	0.0403396	0.772513	0.389879	0.029669
Glycogen synthase kinase-3 beta	Gsk3b	0.489818	0.0238977	0.389217	0.0264067
5-AMP-activated protein kinase catalytic subunit alpha-1	Prkaa1	0.240759	0.105178	0.38908	0.0118924
ATP-binding cassette sub-family D member 3	Abcd3	0.33952	0.108661	0.389032	0.07279
Tubulin beta-4B chain;Tubulin beta-4A chain	Tubb4b;Tubb4a	0.609303	0.00542661	0.388672	0.0934346
Sec1 family domain-containing protein 1	Scfd1	0.240811	0.11297	0.387557	0.0809058
EH domain-containing protein 4	Ehd4	0.482733	0.00351789	0.387232	0.0578671
Nuclear pore complex protein Nup93	Nup93	0.331835	0.0236866	0.386579	0.0209039
Developmentally-regulated GTP-binding protein 2	Drg2	0.367276	0.00889351	0.38621	0.0134005
60S ribosomal protein L5	Rpl5	0.207293	0.050415	0.384818	0.0220264
Maternal embryonic leucine zipper kinase	Melk	0.344886	0.204151	0.384463	0.0497376
5-AMP-activated protein kinase subunit gamma-1	Prkag1	0.0547998	0.82749	0.383272	0.0991619
Protein transport protein Sec31A	Sec31a	0.167071	0.197113	0.381963	0.0203876
Transmembrane and coiled-coil domain-containing protein 1	Tmco1	0.424409	0.109815	0.381504	0.00837982
Exportin-1	Xpo1	1.48869	0.182927	0.380878	0.257624
Adenylosuccinate lyase	Adsl	0.305709	0.142926	0.380473	0.0143226
C-type lectin domain family 4 member E	Clec4e	0.579188	0.0804739	0.379362	0.0833542
40S ribosomal protein S6	Rps6	0.487548	0.00571264	0.379026	0.0710835
Methionine--tRNA ligase, cytoplasmic	Mars	0.187326	0.0654972	0.378203	0.0179836
Proteasome subunit alpha type-6	Psma6	0.199	0.156169	0.377989	0.0426442
Myelin expression factor 2	Myef2	0.269046	0.0532024	0.377966	0.0169604
Zinc finger and SCAN domain-containing protein 2	Zfp663;Zfp619;Gm5141;Zfp709;Zscan2	-0.614753	0.446842	0.377283	0.0592043
DNA primase;DNA primase small subunit	Prim1	0.337133	0.0672817	0.37716	0.00910612
Eukaryotic translation initiation factor 3 subunit E	Eif3e	-0.405919	0.0894199	0.376633	0.126443
E3 ubiquitin/ISG15 ligase TRIM25	Trim25	0.391273	0.00847173	0.374514	0.00977921
Phosphatidylinositol 4-phosphate 3-kinase C2 domain-containing subunit alpha	Pik3c2a	0.978814	0.00737126	0.374496	0.019024
Pre-mRNA-splicing factor 38B	Prpf38b	-0.669309	0.0242254	0.374409	0.434231
L-lactate dehydrogenase;L-lactate dehydrogenase A chain	Ldha	0.401285	0.029497	0.374388	0.230901
T-complex protein 1 subunit gamma	Cct3	0.186915	0.123091	0.374352	0.0181463
rRNA 2-O-methyltransferase fibrillarin	Fbl	-0.420183	0.0450499	0.374228	0.0199468
Casein kinase I isoform alpha	Csnk1a1	0.457189	0.0176837	0.374044	0.0585376
Phosphoribosyl pyrophosphate synthase-associated protein 2	Prpsap2	0.191608	0.854675	0.372938	0.0876123
Alpha-1,3/1,6-mannosyltransferase ALG2	Alg2	0.144992	0.212853	0.372893	0.00818241
Voltage-dependent anion-selective channel protein 2	Vdac2	0.488045	0.00525577	0.372539	0.00739278
tRNA pseudouridine synthase A, mitochondrial;tRNA pseudouridine synthase	Pus1	0.124917	0.291874	0.371664	0.0129224
Neutrophil cytosol factor 2	Ncf2	0.129139	0.144745	0.371588	0.0101453
40S ribosomal protein S26	Rps26	0.466007	0.00913535	0.371516	0.00618096
Transportin-3	Tnpo3	0.222396	0.0694566	0.371204	0.0147357
Asparagine--tRNA ligase, cytoplasmic	Nars	0.284448	0.0591622	0.371079	0.0249012
Peroxiredoxin-6	Prdx6	0.484776	0.0064902	0.370663	0.151824
Cytochrome b-245 light chain	Cyba	0.316707	0.242245	0.370443	0.0533115
Protein deglycase DJ-1	Park7	0.375644	0.0605307	0.370361	0.149939
26S proteasome non-ATPase regulatory subunit 12	Psmd12	0.349643	0.0409284	0.369912	0.0728101
Elongation factor 1-alpha 1	Eef1a1	0.455229	0.00363081	0.369906	0.134878
Hexokinase-2;Hexokinase	Hk2	0.344671	0.0239693	0.369624	0.0163201
Coatomer subunit gamma-1	Copg1	0.425451	0.00291029	0.369355	0.0349765
AP-2 complex subunit sigma	Ap2s1	0.0172345	0.930254	0.368933	0.0249995
Myeloid differentiation primary response protein MyD88	Myd88	0.415545	0.04013	0.367596	0.0165916
Trimeric intracellular cation channel type B	Tmem38b	0.346349	0.0574007	0.366881	0.0206317
Ras-related protein Rab-8A	Rab8a	0.493118	0.0131991	0.363747	0.0989992
DnaJ homolog subfamily B member 6	Dnajb6	0.289779	0.045931	0.361479	0.0755529
Sphingosine-1-phosphate lyase 1	Sgpl1	0.42229	0.025386	0.360529	0.0131182
HMG box transcription factor BBX	Bbx	-1.83523	0.00711635	0.35968	0.63762
Platelet-activating factor acetylhydrolase IB subunit alpha	Pafah1b1	-0.18248	0.873627	0.35939	0.297124
Fatty acid desaturase 2	Fads2	0.57341	0.00410868	0.356809	0.0177509
Cullin-5	Cul5	0.558004	0.0819906	0.356081	0.0443921
Triosephosphate isomerase	Tpi1	-0.342059	0.0585908	0.35461	0.163613
Protein THEMIS2	Themis2	0.479961	0.0091847	0.351721	0.029655
Vacuolar protein sorting-associated protein 26A	Vps26a	0.507338	0.0036197	0.35158	0.205004
40S ribosomal protein S3a	Rps3a	0.407519	0.00889265	0.35129	0.0623679
Syntaxin-binding protein 2	Stxbp2	0.340839	0.0280424	0.350596	0.032809
Glycogen phosphorylase, brain form;Alpha-1,4 glucan phosphorylase;Glycogen phosphorylase, muscle form;Glycogen phosphorylase, liver form	Pygb;Pygm;Pygl	0.79014	0.0849396	0.34947	0.0316587
Serine hydroxymethyltransferase	Shmt2	0.877167	0.00343846	0.349312	0.0439914
NADH dehydrogenase [ubiquinone] 1 alpha subcomplex subunit 10, mitochondrial	Ndufa10	0.375787	0.0211133	0.348866	0.0115242
Structural maintenance of chromosomes protein 3	Smc3	0.395786	0.0259689	0.34827	0.0309529
60S ribosomal protein L22-like 1	Rpl22l1	0.332027	0.330213	0.347538	0.137755
Dolichyl-diphosphooligosaccharide--protein glycosyltransferase subunit 1	Rpn1	0.544051	0.00535653	0.347354	0.0115355
28S ribosomal protein S27, mitochondrial	Mrps27	0.832919	0.162737	0.345698	0.0687708
S-adenosylmethionine synthase isoform type-2	Mat2a	0.48641	0.00568749	0.34543	0.0528314
Eukaryotic translation initiation factor 4E	Eif4e	0.696832	0.00121768	0.345225	0.0369595
Eukaryotic translation initiation factor 4 gamma 3	Eif4g3	0.303395	0.0188477	0.344449	0.0171862
Glutamine--fructose-6-phosphate aminotransferase [isomerizing] 1	Gfpt1	0.376768	0.0292426	0.343719	0.0157333
	Eif2b3	0.323949	0.0761923	0.341252	0.00925107
Mannose-1-phosphate guanyltransferase alpha	Gmppa	0.613017	0.0249323	0.341129	0.437672
Origin recognition complex subunit 5	Orc5	0.183824	0.170063	0.340931	0.172402
NADH dehydrogenase [ubiquinone] 1 alpha subcomplex subunit 1	Ndufa1	0.495186	0.0410976	0.340912	0.0129224
Protein spinster homolog 1	Spns1	0.149305	0.0894265	0.340307	0.0491718
Sterol 26-hydroxylase, mitochondrial	Cyp27a1	0.859025	0.0980678	0.340227	0.107682
Ubiquinone biosynthesis O-methyltransferase, mitochondrial	Coq3	-0.317608	0.540357	0.33893	0.0223137
60S ribosomal protein L34	Rpl34	-0.0624182	0.839882	0.338928	0.137755
Kelch repeat and BTB domain-containing protein 11	Kbtbd11	0.309707	0.228208	0.338164	0.0147357
Translocation protein SEC63 homolog	Sec63	0.568866	0.118109	0.337589	0.0759891
MICOS complex subunit Mic60	Immt	0.3725	0.031815	0.337309	0.0317539
Prolyl endopeptidase	Prep	0.25496	0.124676	0.335757	0.498068
	Fxr2	1.06964	0.2118	0.334371	0.0890366
RAC-alpha serine/threonine-protein kinase	Akt1	0.347277	0.0347144	0.33429	0.0193848
Phosphatidylinositol 4-phosphate 5-kinase type-1 alpha	Pip5k1a	0.268181	0.266386	0.332097	0.0271077
Cytoplasmic FMR1-interacting protein 1	Cyfip1	0.343185	0.0173691	0.331956	0.00907628
40S ribosomal protein S20	Rps20	0.413773	0.00744349	0.330178	0.0983793
40S ribosomal protein S7	Rps7;Gm9493	0.473653	0.00382161	0.329746	0.098105
Transmembrane protein 165	Tmem165	0.271802	0.366649	0.32657	0.0620619
Protein LSM12 homolog	Lsm12	0.678574	0.000985592	0.326533	0.19771
NADH dehydrogenase [ubiquinone] 1 alpha subcomplex subunit 12	Ndufa12	0.393396	0.0498408	0.326394	0.0150892
Zyxin	Zyx	-2.57043	0.00720909	0.325634	0.70063
Condensin complex subunit 2	Ncaph	0.192937	0.0646998	0.325446	0.0142479
Poly(rC)-binding protein 1	Pcbp1	0.279577	0.0237744	0.325008	0.0121492
Actin-related protein 2/3 complex subunit 4	Arpc4	0.476596	0.0164165	0.321582	0.0270341
Transmembrane protein 126A	Tmem126a	0.485332	0.0859422	0.321467	0.0401675
V-type proton ATPase subunit C 1	Atp6v1c1	0.411232	0.0182114	0.321423	0.0453445
3-ketoacyl-CoA thiolase, mitochondrial	Acaa2	0.351217	0.0444755	0.320597	0.197858
Alpha-enolase	Eno1	0.197092	0.104252	0.320537	0.0340772
DnaJ homolog subfamily A member 1	Dnaja1	0.271333	0.0761923	0.320411	0.0479143
Ribosome maturation protein SBDS	Sbds	0.57155	0.096993	0.318288	0.273295
Bridging integrator 3	Bin3	-0.00379907	0.994431	0.317033	0.297124
Integrin alpha-M	Itgam	-0.512485	0.391558	0.316693	0.132225
Protein NipSnap homolog 2	Gbas	0.482164	0.00622747	0.31669	0.0993598
40S ribosomal protein S13	Rps13	0.385165	0.0152432	0.316235	0.0577903
Eukaryotic translation initiation factor 3 subunit M	Eif3m	-0.507523	0.0200601	0.315673	0.0261667
28S ribosomal protein S10, mitochondrial	Mrps10	2.09452	0.0358734	0.314758	0.029708
Vacuolar protein sorting-associated protein 28 homolog	Vps28	0.188972	0.382673	0.314726	0.298466
Vacuolar protein-sorting-associated protein 25	Vps25	-0.251431	0.479245	0.314122	0.665609
tRNA (uracil-5-)-methyltransferase homolog A	Trmt2a	0.115319	0.368046	0.313079	0.135097
Leucine--tRNA ligase, cytoplasmic	Lars	0.229297	0.107056	0.313075	0.0351634
	Slfn2	0.645748	0.00810859	0.312818	0.0313807
Transcriptional activator protein Pur-beta	Purb	0.293051	0.0257207	0.312336	0.0613656
Aspartate--tRNA ligase, cytoplasmic	Dars	0.319211	0.00885652	0.310831	0.0119803
Activating signal cointegrator 1 complex subunit 3	Ascc3	0.0519445	0.603218	0.31064	0.0534282
Oxysterol-binding protein	Osbpl8	0.185343	0.293175	0.310033	0.0240857
Serine/threonine-protein kinase TBK1	Tbk1	0.209369	0.0832405	0.309636	0.0509959
V-type proton ATPase subunit d 1	Atp6v0d1	0.916337	0.157218	0.309524	0.0953082
AP-1 complex subunit mu-1	Ap1m1	0.391194	0.0263551	0.30946	0.0213585
Eukaryotic translation initiation factor 5A;Eukaryotic translation initiation factor 5A-2;Eukaryotic translation initiation factor 5A-1	Eif5a;Eif5a2	-0.177603	0.691527	0.308833	0.307082
Antigen peptide transporter 1	Tap1	0.204287	0.0867141	0.307598	0.0925409
AP-2 complex subunit alpha-1	Ap2a1	0.207894	0.103618	0.305997	0.0219639
Receptor-interacting serine/threonine-protein kinase 3	Ripk3	0.441566	0.00804526	0.305991	0.0155422
Ribonucleoside-diphosphate reductase large subunit	Rrm1	0.352884	0.0694921	0.301371	0.0891398
Catenin delta-1	Ctnnd1	0.473023	0.00825876	0.300212	0.03533
Bifunctional lysine-specific demethylase and histidyl-hydroxylase MINA	Mina	0.153279	0.908922	0.298794	0.0499885
AP-2 complex subunit mu	Ap2m1	0.379682	0.050415	0.2981	0.0430006
Nucleolar protein 10	Nol10	-0.00999916	0.917918	0.29714	0.166764
Magnesium transporter protein 1	Magt1	0.28987	0.0933954	0.296795	0.0351619
NADH dehydrogenase [ubiquinone] iron-sulfur protein 7, mitochondrial	Ndufs7	0.490652	0.00829942	0.296655	0.0387456
WD repeat-containing protein 37	Wdr37	-0.279479	0.772454	0.29548	0.743098
Uridine-cytidine kinase 2	Uck2	0.52463	0.00166679	0.295243	0.0258864
Tectonin beta-propeller repeat-containing protein 1	Tecpr1	0.861644	0.168464	0.294931	0.285247
Serine/threonine-protein kinase A-Raf	Araf	0.199058	0.0563521	0.29481	0.025326
Putative N-acetylglucosamine-6-phosphate deacetylase	Amdhd2	0.439865	0.226609	0.294468	0.196375
L-aminoadipate-semialdehyde dehydrogenase-phosphopantetheinyl transferase	Aasdhppt	-0.473721	0.571166	0.293437	0.7633
Malate dehydrogenase, cytoplasmic	Mdh1	0.949973	0.150521	0.292987	0.319287
Suppressor of G2 allele of SKP1 homolog	Sugt1	0.31952	0.0400097	0.292822	0.0792774
Actin-related protein 2	Actr2	0.452489	0.0565296	0.29234	0.0410398
ATP-dependent RNA helicase DDX24	Ddx24	0.154391	0.2667	0.292093	0.0224571
Down syndrome critical region protein 3 homolog	Dscr3	0.0351993	0.819101	0.291626	0.0387456
Tyrosine-protein kinase BTK	Btk	0.325371	0.0193367	0.28883	0.0255788
Voltage-dependent anion-selective channel protein 1	Vdac1	0.362802	0.0211133	0.288147	0.0807273
Ubiquitin-protein ligase E3A	Ube3a	0.0388594	0.693115	0.287192	0.058215
Puromycin-sensitive aminopeptidase	Npepps	0.17132	0.252321	0.28709	0.111456
Peroxisomal membrane protein PMP34	Slc25a17	-0.298742	0.6463	0.286509	0.150448
Protein bicaudal D homolog 2	Bicd2	-1.16002	0.212027	0.286447	0.446639
Heterogeneous nuclear ribonucleoprotein H2	Hnrnph2	0.30705	0.108861	0.285435	0.0602069
Neutrophil cytosol factor 1	Ncf1	0.171098	0.113	0.285323	0.0443985
Adenine phosphoribosyltransferase	Aprt	-0.227192	0.693115	0.283782	0.47935
ATPase family AAA domain-containing protein 1	Atad1	0.411784	0.061646	0.283653	0.0592043
Nucleoporin Nup37	Nup37	1.63223	0.252025	0.283559	0.0794981
Secretory carrier-associated membrane protein 3	Scamp3	0.367895	0.0475713	0.283005	0.104748
von Willebrand factor A domain-containing protein 5A	Vwa5a	0.136243	0.27572	0.279867	0.195189
Eukaryotic peptide chain release factor subunit 1	Etf1	0.148387	0.296835	0.279538	0.174892
Protein PRRC2C	Prrc2c	0.068643	0.455902	0.279364	0.0460631
THUMP domain-containing protein 1	Thumpd1	0.375485	0.579516	0.278963	0.0753674
Nuclear RNA export factor 1	Nxf1	0.162948	0.239505	0.277541	0.154824
Ubiquitin carboxyl-terminal hydrolase;Ubiquitin carboxyl-terminal hydrolase 4	Usp4	1.17731	0.237908	0.276945	0.0620251
Probable ATP-dependent RNA helicase YTHDC2	Ythdc2	1.2144	0.024599	0.27679	0.0655418
Cyclin-dependent kinase 1	Cdk1	0.38551	0.0182381	0.276418	0.028732
Coatomer subunit alpha;Xenin;Proxenin;Coatomer subunit alpha	Copa	0.341073	0.0134681	0.276117	0.0759891
NADH dehydrogenase [ubiquinone] flavoprotein 2, mitochondrial	Ndufv2	0.0840049	0.4998	0.275834	0.0426442
Cytoplasmic dynein 1 heavy chain 1	Dync1h1	0.520616	0.00998363	0.275651	0.0484225
Inositol monophosphatase 2	Impa2	0.558218	0.163518	0.275524	0.135676
Protein FAM179B	Fam179b	0.999578	0.00241849	0.274711	0.0290069
Tyrosine-protein phosphatase non-receptor type 6	Ptpn6	0.0299213	0.812574	0.274668	0.213207
BRISC complex subunit Abro1	Fam175b	0.352145	0.0125098	0.271351	0.0237454
Dedicator of cytokinesis protein 11	Dock11	-0.129252	0.695344	0.270881	0.129248
ATP-binding cassette sub-family F member 1	Abcf1	-1.12716	0.134699	0.27017	0.509915
26S proteasome non-ATPase regulatory subunit 4	Psmd4	0.740036	0.00904722	0.269344	0.297149
	Iqgap3	0.244849	0.310666	0.269296	0.0259158
Unconventional myosin-Ie	Myo1e	0.140747	0.143227	0.269293	0.028705
39S ribosomal protein L21, mitochondrial	Mrpl21	0.361466	0.772598	0.269102	0.481832
Cell division cycle protein 20 homolog	Cdc20	0.18739	0.335054	0.268536	0.214576
V-type proton ATPase subunit B, brain isoform	Atp6v1b2;Atp6v1b1	-1.81214	0.0298892	0.26821	0.0916826
Hexokinase;Hexokinase-1	Hk1	0.282952	0.133529	0.267069	0.0765376
Beta-parvin	Parvb	0.33408	0.0771766	0.267006	0.079132
Fatty acid desaturase 1	Fads1	0.549358	0.00280488	0.266816	0.0235495
	Mroh1	0.243809	0.0418619	0.26645	0.0620251
Vacuolar protein sorting-associated protein 35	Vps35	0.32237	0.0124307	0.266078	0.0342047
	Ddx19b	-0.25513	0.611823	0.265062	0.205327
cGMP-dependent 3,5-cyclic phosphodiesterase	Pde2a	-0.0720359	0.772598	0.264125	0.221966
Unconventional myosin-Ig	Myo1g	0.510221	0.0176339	0.263659	0.0447666
ADP-ribosylation factor-like protein 8B;ADP-ribosylation factor-like protein 8A	Arl8b;Arl8a	2.76412	2.29034e-05	0.261704	0.0502144
6-phosphogluconate dehydrogenase, decarboxylating	Pgd	0.383628	0.0148423	0.261489	0.0555894
Phosphoinositide 3-kinase regulatory subunit 4	Pik3r4	0.378652	0.0740814	0.261062	0.0854543
Protein FAM49B	Fam49b	0.273703	0.0625457	0.260673	0.0356546
	Gcn1l1	0.322689	0.0103823	0.260116	0.0560678
60S ribosomal protein L38	Rpl38	0.48496	0.0210507	0.259104	0.185556
Dual specificity protein kinase TTK	Ttk	-1.84237	0.00612531	0.258695	0.194769
Mixed lineage kinase domain-like protein	Mlkl	0.748552	0.0569548	0.258568	0.0860624
	Qars	0.134311	0.293664	0.258182	0.073898
	Rasgrp3	0.832662	0.00241654	0.258052	0.225959
UPF0505 protein C16orf62 homolog	9030624J02Rik	0.261425	0.0290525	0.255874	0.0534282
26S proteasome non-ATPase regulatory subunit 13	Psmd13	0.442593	0.0430396	0.25548	0.257217
U3 small nucleolar RNA-associated protein 18 homolog	Utp18	-0.113888	0.254003	0.254557	0.05185
WD repeat-containing protein 11	Wdr11	0.168283	0.186163	0.253954	0.316227
Fatty acid synthase;[Acyl-carrier-protein] S-acetyltransferase;[Acyl-carrier-protein] S-malonyltransferase;3-oxoacyl-[acyl-carrier-protein] synthase;3-oxoacyl-[acyl-carrier-protein] reductase;3-hydroxyacyl-[acyl-carrier-protein] dehydratase;Enoyl-[acyl-carrier-protein] reductase;Oleoyl-[acyl-carrier-protein] hydrolase	Fasn	0.0949434	0.366037	0.251719	0.0567947
Activating signal cointegrator 1 complex subunit 1	Ascc1	0.662395	0.0117066	0.25125	0.195088
ATP-dependent RNA helicase DHX36	Dhx36	0.0914254	0.298158	0.250999	0.376998
	Slc2a6	0.347827	0.0329533	0.25009	0.0816378
Macrosialin	Cd68	0.278477	0.728704	0.249577	0.286898
E3 ubiquitin-protein ligase listerin	Ltn1	-0.197883	0.261974	0.249416	0.338228
Sperm-specific antigen 2 homolog	Ssfa2	0.154385	0.239505	0.249371	0.183238
Thioredoxin reductase 1, cytoplasmic	Txnrd1	0.137002	0.788547	0.249191	0.160741
Leucine-rich repeat and calponin homology domain-containing protein 3	Lrch3	0.31951	0.0525944	0.248727	0.0916826
Sarcoplasmic/endoplasmic reticulum calcium ATPase 2	Atp2a2	0.212799	0.0739431	0.24865	0.0809058
GPI transamidase component PIG-T	Pigt	0.55649	0.164703	0.247924	0.0856576
Transporter;Sodium- and chloride-dependent betaine transporter	Slc6a12	0.101648	0.452692	0.247646	0.1177
Phosphatidylserine synthase 1	Ptdss1	0.345489	0.0272141	0.247631	0.403875
Guanine nucleotide-binding protein G(s) subunit alpha isoforms short;Guanine nucleotide-binding protein G(s) subunit alpha isoforms XLas	Gnas	0.826869	0.00978865	0.247403	0.253423
Ubiquitin-associated domain-containing protein 2	Ubac2	0.109544	0.483096	0.245791	0.0478106
Pleckstrin homology domain-containing family A member 2	Plekha2	0.110807	0.428174	0.245431	0.143721
Probable ATP-dependent RNA helicase DDX5	Ddx5	0.0895413	0.294719	0.245113	0.0955573
Bifunctional purine biosynthesis protein PURH;Phosphoribosylaminoimidazolecarboxamide formyltransferase;IMP cyclohydrolase	Atic	0.569442	0.187604	0.244077	0.212548
26S proteasome non-ATPase regulatory subunit 7	Psmd7	0.43865	0.0365426	0.244065	0.100624
Segment polarity protein dishevelled homolog DVL-3	Dvl3	0.488721	0.15078	0.244011	0.178879
Spartin	Spg20	0.455546	0.013358	0.243263	0.225048
3-keto-steroid reductase	Hsd17b7	0.339227	0.0690349	0.242361	0.0669248
RAF proto-oncogene serine/threonine-protein kinase	Raf1	-0.678522	0.603218	0.241866	0.652473
Ribosomal RNA-processing protein 7 homolog A	Rrp7a	-0.36409	0.68856	0.241251	0.41408
Structural maintenance of chromosomes protein 1A	Smc1a	0.459238	0.00761767	0.241165	0.102137
TAR DNA-binding protein 43	Tardbp	0.143808	0.134969	0.241148	0.0424289
E3 ubiquitin-protein ligase MARCH7	March7	0.816657	0.031165	0.240602	0.153899
BRCA2 and CDKN1A-interacting protein	Bccip	0.533645	0.0241389	0.240207	0.167751
Transcription termination factor 2	Ttf2	0.338481	0.0221967	0.239329	0.154773
Runt-related transcription factor 1	Runx1	0.542663	0.00289755	0.238385	0.0349765
mRNA-decapping enzyme 1A	Dcp1a	0.439321	0.0555324	0.238178	0.0329202
E3 ubiquitin-protein ligase TRIM56	Trim56	0.610493	0.1035	0.237642	0.0541625
	Ncapg	0.042204	0.737259	0.237391	0.0443921
26S proteasome non-ATPase regulatory subunit 14	Psmd14	0.496402	0.0252463	0.236838	0.0670816
Atlastin-2	Atl2	0.327721	0.0239547	0.236512	0.0592043
Erythrocyte band 7 integral membrane protein	Stom	0.146081	0.123754	0.236368	0.0331245
Vesicle-fusing ATPase	Nsf	0.270346	0.0163627	0.234171	0.0745346
GEM-interacting protein	Gmip	0.325404	0.0386775	0.234063	0.193688
Cathepsin Z	Ctsz	0.122867	0.367451	0.233795	0.365493
Origin recognition complex subunit 4	Orc4	0.290245	0.0591622	0.231607	0.187399
TIP41-like protein	Tiprl	0.375082	0.0144497	0.231418	0.0662969
Cyclin-dependent kinase 6	Cdk6	0.422898	0.046414	0.230292	0.0455451
IgE-binding protein	Iap	0.607729	0.0219668	0.230113	0.299156
Proteasome subunit alpha type-7;Proteasome subunit alpha type-7-like	Psma7;Psma8	0.289518	0.0201203	0.22968	0.311339
Rho guanine nucleotide exchange factor 10-like protein	Arhgef10l	0.262308	0.134969	0.229668	0.118188
Unconventional myosin-If	Myo1f	-0.31258	0.486732	0.229584	0.264868
UAP56-interacting factor	Fyttd1	0.63763	0.00320579	0.229356	0.275345
NACHT, LRR and PYD domains-containing protein 3	Nlrp3	0.319505	0.0176234	0.22911	0.0765376
Adaptin ear-binding coat-associated protein 2	Necap2	0.41659	0.0129387	0.228778	0.143837
Leupaxin	Lpxn	-0.059894	0.592495	0.22779	0.0662815
Threonine--tRNA ligase, cytoplasmic	Tars	-0.150337	0.281446	0.22719	0.302103
Tetratricopeptide repeat protein 17	Ttc17	0.333654	0.0107372	0.226648	0.225959
Engulfment and cell motility protein 1	Elmo1	-0.247796	0.531331	0.22558	0.100941
Serine palmitoyltransferase 1	Sptlc1	0.55487	0.0051793	0.225009	0.291983
Dolichyl-diphosphooligosaccharide--protein glycosyltransferase 48 kDa subunit	Ddost	0.348544	0.12464	0.224463	0.062747
Pleckstrin homology domain-containing family M member 1	Plekhm1	0.0049182	0.984556	0.22426	0.419263
Nuclear pore complex protein Nup160	Nup160	0.228142	0.198553	0.224171	0.0658778
Vacuolar protein sorting-associated protein 13C	Vps13c	0.307664	0.0267239	0.22288	0.079735
H-2 class I histocompatibility antigen, D-D alpha chain;H-2 class I histocompatibility antigen, alpha chain	H2-D1;H2-Q4	1.0615	0.172841	0.222334	0.0420817
	Heatr1	-0.0275732	0.831659	0.221587	0.0877016
Transportin-1	Tnpo1	0.154287	0.130141	0.221371	0.206574
Isoleucine--tRNA ligase, cytoplasmic	Iars	0.147828	0.208409	0.218974	0.0836644
Serine/threonine-protein phosphatase 6 catalytic subunit;Serine/threonine-protein phosphatase 6 catalytic subunit, N-terminally processed	Ppp6c	0.217032	0.0326186	0.217956	0.0685398
Alanine--tRNA ligase, mitochondrial	Aars2	-1.302	0.19198	0.21788	0.738646
Coatomer subunit gamma-2	Copg2	0.22128	0.0736866	0.217581	0.116575
Stress-induced-phosphoprotein 1	Stip1	-0.616325	0.0204847	0.216165	0.492289
Cytohesin-4	Cyth4	0.384304	0.0865106	0.215652	0.194503
Eukaryotic translation initiation factor 5B	Eif5b	-0.403004	0.0154654	0.214994	0.414839
General transcription factor IIH subunit 2	Gtf2h2	0.171889	0.453043	0.214992	0.227226
Transient receptor potential cation channel subfamily V member 2	Trpv2	0.0965849	0.513863	0.213816	0.0661754
Nucleolar protein 58	Nop58	-0.434908	0.0292265	0.213707	0.109772
Poly [ADP-ribose] polymerase 9	Parp9	0.586994	0.00234306	0.212541	0.119842
GDP-mannose 4,6 dehydratase	Gmds	0.534349	0.0361758	0.211191	0.0760416
COMM domain-containing protein 3	Commd3	0.144338	0.686877	0.210539	0.38886
Vacuolar protein sorting-associated protein 16 homolog	Vps16	0.272216	0.0974533	0.209602	0.173069
Derlin-2;Derlin-3	Derl2;Derl3	0.50092	0.313914	0.209065	0.12528
ATP-binding cassette sub-family F member 3	Abcf3	0.118291	0.256604	0.209055	0.0828242
Rho GTPase-activating protein 1	Arhgap1	0.0177225	0.856961	0.208987	0.112714
3-ketoacyl-CoA thiolase A, peroxisomal;3-ketoacyl-CoA thiolase B, peroxisomal	Acaa1a;Acaa1b	0.294176	0.145591	0.208984	0.446639
Thioredoxin-interacting protein	Txnip	0.653641	0.0935828	0.206695	0.0811567
Condensin complex subunit 1	Ncapd2	0.208783	0.109326	0.20571	0.148813
Anaphase-promoting complex subunit 7	Anapc7	0.515589	0.273014	0.203792	0.251583
Translation initiation factor eIF-2B subunit beta	Eif2b2	0.152237	0.577423	0.203295	0.369365
Protein MAK16 homolog	Mak16	0.0198523	0.865092	0.202853	0.365282
E3 ubiquitin-protein ligase DTX3L	Dtx3l	0.345349	0.0142836	0.202607	0.0785202
Proteasome subunit beta type-2	Psmb2	-0.266497	0.636562	0.202555	0.412054
Rho guanine nucleotide exchange factor 40	Arhgef40	-1.14964	0.0213795	0.202374	0.874159
Cytoskeleton-associated protein 5	Ckap5	0.641615	0.00313347	0.202	0.0765376
Phosphoglycerate kinase 1;Phosphoglycerate kinase	Pgk1	-0.238269	0.106132	0.199957	0.57854
Arf-GAP with Rho-GAP domain, ANK repeat and PH domain-containing protein 3	Arap3	0.434583	0.111599	0.199219	0.120776
Serine/threonine-protein kinase RIO1	Riok1	-0.19493	0.0548839	0.198412	0.232832
Ran-specific GTPase-activating protein	Ranbp1	-0.266197	0.0266321	0.198123	0.312513
DBF4-type zinc finger-containing protein 2 homolog	Zdbf2	-3.65476	0.00124578	0.197117	0.376907
Proteasome subunit alpha type-5	Psma5	0.629486	0.000958776	0.195233	0.312072
DNA-directed RNA polymerases I, II, and III subunit RPABC1	Polr2e	-0.37062	0.196711	0.194765	0.306614
HAUS augmin-like complex subunit 4	Haus4	-1.05738	0.338896	0.19423	0.307082
Vacuolar protein sorting-associated protein 4B	Vps4b	0.387701	0.025058	0.193821	0.257475
Nucleolar GTP-binding protein 1	Gtpbp4	-0.28752	0.108661	0.193402	0.065752
Signal recognition particle subunit SRP68	Srp68	-0.0211393	0.856915	0.192903	0.205871
Enhancer of mRNA-decapping protein 3	Edc3	0.460445	0.00721487	0.192522	0.249159
Arginine--tRNA ligase, cytoplasmic	Rars	0.283697	0.0158459	0.192121	0.0626156
ZW10 interactor	Zwint	0.666994	0.00351513	0.191546	0.273699
Heme oxygenase 1	Hmox1	-0.257895	0.562336	0.190804	0.446639
Ribosome biogenesis protein NSA2 homolog	Nsa2	0.166714	0.254852	0.189932	0.41683
Cirhin	Cirh1a	-0.233383	0.720611	0.189624	0.174291
Tubulin alpha-1C chain	Tuba1c	0.60078	0.00973369	0.189592	0.585738
Syntaxin-binding protein 1	Stxbp1	-0.0310131	0.774072	0.189382	0.356819
Tetratricopeptide repeat protein 21B	Ttc21b	0.155127	0.784016	0.189257	0.358907
Plakophilin-1	Pkp1	0.167799	0.797949	0.188807	0.545084
Eukaryotic translation initiation factor 2 subunit 1	Eif2s1	0.0402675	0.825502	0.188594	0.241595
Bifunctional glutamate/proline--tRNA ligase;Glutamate--tRNA ligase;Proline--tRNA ligase	Eprs	0.180387	0.120248	0.188348	0.0660039
Aldose reductase	Akr1b1	-1.37555	0.0649315	0.187991	0.539863
Homocysteine-responsive endoplasmic reticulum-resident ubiquitin-like domain member 1 protein	Herpud1	0.404893	0.049503	0.187525	0.220506
E3 ubiquitin-protein ligase HUWE1	Huwe1	0.719502	0.000971576	0.186972	0.113208
Aldehyde dehydrogenase family 3 member B1;Aldehyde dehydrogenase	Aldh3b1;Aldh3b2;1700055N04Rik	-1.93269	0.0270726	0.186867	0.184354
Adenylosuccinate synthetase isozyme 1	Adssl1	0.568464	0.401591	0.185954	0.221979
Ribosomal L1 domain-containing protein 1	Rsl1d1	-1.9408	0.138824	0.184971	0.391234
Aspartate aminotransferase, cytoplasmic	Got1	0.146667	0.853982	0.184477	0.120078
Calcium/calmodulin-dependent protein kinase type II subunit gamma	Camk2g;Camk2b	0.147948	0.3243	0.183992	0.108317
Malic enzyme;NADP-dependent malic enzyme	Me1	-0.109307	0.774799	0.183028	0.176284
Aly/REF export factor 2;THO complex subunit 4	Alyref2;Alyref	-1.17234	0.0579524	0.183006	0.61711
Growth arrest-specific protein 7	Gas7	-0.415513	0.729236	0.182628	0.815155
Nuclear fragile X mental retardation-interacting protein 2	Nufip2	0.429016	0.00299148	0.181397	0.122842
Fructose-bisphosphate aldolase A;Fructose-bisphosphate aldolase	Aldoa;Aldoart1	0.480232	0.00641435	0.181342	0.13428
Pericentrin	Pcnt	-0.0212435	0.917918	0.181314	0.431071
Protein transport protein Sec23B	Sec23b	0.0592905	0.572761	0.181093	0.236194
HCLS1-associated protein X-1	Hax1	0.353075	0.0607695	0.18086	0.200994
Origin recognition complex subunit 1	Orc1	0.184917	0.0787663	0.179547	0.157291
UPF0609 protein C4orf27 homolog		0.15744	0.177294	0.17917	0.14669
Importin subunit alpha-1	Kpna2	0.511139	0.0149392	0.179112	0.127963
HAUS augmin-like complex subunit 3	Haus3	0.526143	0.1219	0.178447	0.763986
TATA box-binding protein-like protein 1	Tbpl1	0.0142948	0.930988	0.178256	0.223525
Ataxin-10	Atxn10	0.404202	0.0795519	0.178164	0.298602
Docking protein 1	Dok1	0.543348	0.0012925	0.177976	0.10235
FAS-associated factor 2	Faf2	0.310473	0.0587082	0.177372	0.409699
Proteasome subunit alpha type-1	Psma1	0.590427	0.103618	0.176012	0.362861
Mitochondrial import inner membrane translocase subunit Tim23	Timm23	0.57208	0.00283816	0.175581	0.267784
Replication factor C subunit 5	Rfc5	0.165559	0.085965	0.174725	0.131554
Phospholipase A-2-activating protein	Plaa	-0.248081	0.031165	0.173966	0.320789
Heat shock protein HSP 90-beta	Hsp90ab1	0.174395	0.167042	0.173665	0.0846492
Acyl-CoA desaturase 2;Acyl-CoA desaturase 1	Scd2;Scd3;Scd1	0.840899	0.000467512	0.173453	0.483447
Rab3 GTPase-activating protein non-catalytic subunit	Rab3gap2	0.292553	0.0292426	0.172066	0.234251
Mitogen-activated protein kinase kinase kinase 7	Map3k7	0.236573	0.149036	0.171596	0.419148
Spindle assembly abnormal protein 6 homolog	Sass6	0.819543	0.0450519	0.171427	0.116575
Desmoplakin	Dsp	-0.0798999	0.868831	0.171317	0.792544
Ubiquitin carboxyl-terminal hydrolase 10	Usp10	0.0830754	0.484502	0.171195	0.192913
Ubiquitin-like modifier-activating enzyme 1	Uba1	-0.617248	0.0606092	0.171192	0.38866
Paired amphipathic helix protein Sin3b	Sin3b	-1.16541	0.0444755	0.170749	0.645296
mRNA export factor	Rae1	0.00711336	0.965235	0.170462	0.1021
26S proteasome non-ATPase regulatory subunit 5	Psmd5	0.0208136	0.847358	0.169967	0.273699
SWI/SNF complex subunit SMARCC2	Smarcc2	-1.71737	0.062563	0.169934	0.832476
D-3-phosphoglycerate dehydrogenase	Phgdh	0.131714	0.252321	0.169447	0.195368
Probable 28S rRNA (cytosine-C(5))-methyltransferase	Nsun5	0.805376	0.125532	0.167338	0.136015
DNA-directed RNA polymerases I and III subunit RPAC1	Polr1c	-0.00543337	0.974129	0.167257	0.306002
Methylosome protein 50	Wdr77	0.335207	0.0934581	0.166375	0.246875
Cleavage and polyadenylation specificity factor subunit 3	Cpsf3	0.259891	0.0284731	0.165556	0.184259
AP complex subunit beta;AP-2 complex subunit beta	Ap2b1	0.286633	0.0402097	0.160863	0.319287
Actin-related protein 2/3 complex subunit 1B	Arpc1b	0.268277	0.198326	0.159818	0.253263
Ornithine decarboxylase	Odc1	1.14038	0.0592521	0.159788	0.835011
DDB1- and CUL4-associated factor 13	Dcaf13	0.251179	0.106132	0.15908	0.0968014
Actin-related protein 3	Actr3	0.209757	0.197987	0.158778	0.46458
Microtubule-associated protein RP/EB family member 2	Mapre2	0.36886	0.106466	0.158476	0.119182
Importin-8	Ipo8	0.169632	0.365791	0.158447	0.268441
	Dhx37	0.976068	0.400053	0.157602	0.273699
ATP-binding cassette sub-family D member 1	Abcd1	0.401368	0.0065762	0.157288	0.339553
Ras suppressor protein 1	Rsu1	0.330108	0.065167	0.157141	0.856201
E3 ubiquitin-protein ligase HECTD3	Hectd3	0.60603	0.278481	0.15687	0.605791
Mid1-interacting protein 1	Mid1ip1	0.974837	0.296582	0.156317	0.164231
Arf-GAP with Rho-GAP domain, ANK repeat and PH domain-containing protein 1	Arap1	0.29318	0.277215	0.155666	0.335977
E3 ubiquitin-protein ligase RNF213	Rnf213	0.330985	0.014997	0.155604	0.398118
Serine/threonine-protein kinase N1	Pkn1	0.404224	0.0565259	0.155477	0.129248
Cyclin-dependent kinase 2	Cdk2	0.280151	0.0515883	0.15336	0.317819
3-5 exoribonuclease 1	Eri1	0.120198	0.315232	0.151855	0.255493
Tubulin beta-5 chain	Tubb5	0.749558	0.0716808	0.151618	0.661666
Importin-9	Ipo9	0.291964	0.0968544	0.151092	0.147153
DNA-directed RNA polymerase II subunit RPB2	Polr2b	-1.21902	0.000320816	0.148259	0.350568
26S proteasome non-ATPase regulatory subunit 6	Psmd6	0.262916	0.0609074	0.148017	0.424315
Pericentriolar material 1 protein	Pcm1	-0.618853	0.00913535	0.147859	0.341945
T-complex protein 1 subunit eta	Cct7	-0.634302	0.0799783	0.147325	0.276711
Aladin	Aaas	0.271833	0.761068	0.147014	0.705859
Ubiquitin-associated protein 2	Ubap2	-0.116597	0.276143	0.146733	0.473666
E3 ubiquitin-protein ligase MYCBP2	Mycbp2	0.252025	0.0457284	0.14665	0.291983
Elongation of very long chain fatty acids protein;Elongation of very long chain fatty acids protein 5	Elovl5	0.327367	0.130048	0.145591	0.574645
EH domain-containing protein 1	Ehd1	0.169028	0.171753	0.14541	0.466014
Sterol regulatory element-binding protein 1;Processed sterol regulatory element-binding protein 1	Srebf1	1.03508	0.147747	0.144824	0.459763
Cyclin-dependent kinase 4	Cdk4	0.337749	0.00847173	0.144592	0.343794
Neuron navigator 1	Nav1	0.271351	0.232321	0.14405	0.395869
Vacuolar protein sorting-associated protein 37A	Vps37a	0.244358	0.146629	0.14392	0.530511
Proteasome subunit beta type-10	Psmb10	2.89525	0.00128797	0.143009	0.484276
Rho guanine nucleotide exchange factor 1	Arhgef1	0.0408049	0.836447	0.139754	0.125496
Inositol monophosphatase 1	Impa1	1.31097	0.102315	0.138052	0.531975
Signal transducer and transcription activator 6	Stat6	0.0899347	0.459166	0.133527	0.273768
Eukaryotic translation initiation factor 2 subunit 3, X-linked;Eukaryotic translation initiation factor 2 subunit 3, Y-linked	Eif2s3x;Eif2s3y	0.05368	0.627019	0.133438	0.391906
Guanine nucleotide-binding protein G(I)/G(S)/G(T) subunit beta-2	Gnb2	-0.12095	0.708846	0.133231	0.443437
Beta-adrenergic receptor kinase 1	Adrbk1	0.532481	0.00307528	0.131775	0.244086
	H2-M3;H2-T24	-0.513331	0.535951	0.131545	0.750434
NudC domain-containing protein 2	Nudcd2	-0.00692814	0.958732	0.131385	0.166929
MLV-related proviral Env polyprotein;Surface protein;Transmembrane protein		0.398929	0.076323	0.13133	0.545961
MKI67 FHA domain-interacting nucleolar phosphoprotein	Nifk	0.0204635	0.866172	0.131198	0.291076
Protein RCC2	Rcc2	-0.487728	0.0326727	0.130004	0.623755
DNA helicase;DNA replication licensing factor MCM5	Mcm5	-0.0792674	0.459166	0.129147	0.209507
DDB1- and CUL4-associated factor 7	Dcaf7	-0.58993	0.345651	0.125683	0.401707
E3 ubiquitin-protein ligase UBR2	Ubr2	0.305355	0.0415265	0.12563	0.404309
Adenylyltransferase and sulfurtransferase MOCS3;Molybdopterin-synthase adenylyltransferase;Molybdopterin-synthase sulfurtransferase	Mocs3	0.635432	0.400365	0.125058	0.265552
Formin-like protein 1	Fmnl1	0.24896	0.114637	0.124649	0.280978
Myb-binding protein 1A	Mybbp1a	-0.121761	0.220534	0.124537	0.281218
Tyrosine-protein kinase Fes/Fps	Fes	0.547575	0.0318992	0.124369	0.307082
MMS19 nucleotide excision repair protein homolog	Mms19	0.188317	0.129573	0.124076	0.497195
TBC1 domain family member 2A	Tbc1d2	0.551339	0.00236562	0.123282	0.405218
Tyrosine-protein phosphatase non-receptor type 23	Ptpn23	0.00291809	0.973351	0.123085	0.552608
Nitrogen permease regulator 3-like protein	Nprl3	0.402193	0.195953	0.121746	0.43174
Chloride intracellular channel protein 1	Clic1	-0.276094	0.0366921	0.121729	0.283332
Nuclear factor NF-kappa-B p100 subunit;Nuclear factor NF-kappa-B p52 subunit	Nfkb2	-0.110035	0.503589	0.12086	0.289306
1-phosphatidylinositol 4,5-bisphosphate phosphodiesterase gamma-2	Plcg2	0.32212	0.0283287	0.11962	0.419263
26S protease regulatory subunit 4	Psmc1	0.0697293	0.458439	0.119199	0.386681
Serine/threonine-protein kinase PLK1	Plk1	0.245335	0.0804981	0.118982	0.273895
Rho GTPase-activating protein 30	Arhgap30	-0.157851	0.170362	0.118807	0.375329
Ceramide kinase	Cerk	-0.35594	0.671759	0.118254	0.436448
Dynactin subunit 1	Dctn1	0.292736	0.0239163	0.116695	0.338724
Hsp90 co-chaperone Cdc37;Hsp90 co-chaperone Cdc37, N-terminally processed	Cdc37	1.87609	0.129913	0.115559	0.638602
Vigilin	Hdlbp	0.680199	0.00055195	0.114699	0.266225
MICOS complex subunit Mic19	Chchd3	0.553772	0.273079	0.114215	0.435659
Macrophage-expressed gene 1 protein	Mpeg1	-0.575294	0.0206683	0.113854	0.787375
All-trans-retinol 13,14-reductase	Retsat	0.116787	0.849983	0.113205	0.740103
Plectin	Plec	0.353587	0.0114737	0.113171	0.426845
High affinity immunoglobulin epsilon receptor subunit gamma	Fcer1g	0.0513063	0.771324	0.112865	0.689249
	Nup205	0.0844144	0.402069	0.112663	0.276652
Microtubule-associated protein 1S;MAP1S heavy chain;MAP1S light chain	Map1s	0.629882	0.00630476	0.111726	0.274276
Actin-related protein 2/3 complex subunit 2	Arpc2	0.291889	0.0458063	0.111479	0.409226
Exportin-5	Xpo5	0.29607	0.0116901	0.111132	0.341938
Sodium/potassium-transporting ATPase subunit alpha-1	Atp1a1	0.2903	0.0314055	0.1103	0.381799
Tumor necrosis factor receptor type 1-associated DEATH domain protein	Tradd	0.572072	0.139235	0.110235	0.71439
Rab GDP dissociation inhibitor beta	Gdi2	0.159834	0.0968544	0.109583	0.799397
Sorting nexin-20	Snx20	-0.228138	0.513863	0.107521	0.686856
NF-kappa-B-repressing factor	Nkrf	0.530921	0.123224	0.10452	0.411364
Peroxiredoxin-4	Prdx4	0.152718	0.183823	0.104122	0.348798
Aminoacyl tRNA synthase complex-interacting multifunctional protein 2	Aimp2	0.15647	0.150946	0.103832	0.330807
	Wdfy4	0.306191	0.0115308	0.102863	0.276158
Methionine synthase	Mtr	-0.809892	0.0348745	0.101265	0.539863
Heterogeneous nuclear ribonucleoprotein U	Hnrnpu	-0.160502	0.140417	0.100418	0.382212
Ubiquitin carboxyl-terminal hydrolase;Ubiquitin carboxyl-terminal hydrolase 19	Usp19	-0.241675	0.134455	0.100255	0.277264
Protein-tyrosine-phosphatase;Receptor-type tyrosine-protein phosphatase C	Ptprc	-0.236854	0.406104	0.0996656	0.310501
Serine/threonine-protein kinase SIK2	Sik2	1.90174	0.0226909	0.0983501	0.67645
Mitotic spindle assembly checkpoint protein MAD2A	Mad2l1	0.195421	0.391329	0.0978361	0.427671
Sequestosome-1	Sqstm1	0.267885	0.124103	0.0968664	0.512074
TGF-beta-activated kinase 1 and MAP3K7-binding protein 1	Tab1	0.335141	0.0839419	0.0961371	0.312919
T-complex protein 1 subunit delta	Cct4	-0.0694855	0.599277	0.0936212	0.610201
SUN domain-containing protein 2	Sun2	0.149207	0.236322	0.0935485	0.375613
Deubiquitinating protein VCIP135	Vcpip1	-0.0103114	0.917918	0.0931999	0.42931
Coatomer subunit beta	Copb2	-0.646004	0.0609107	0.0926809	0.554286
Dual specificity protein phosphatase 3	Dusp3	-0.324759	0.14349	0.0920094	0.607865
Histone acetyltransferase type B catalytic subunit	Hat1	-0.0191959	0.902448	0.091022	0.374704
DNA ligase;DNA ligase 1	Lig1	-0.0900776	0.345651	0.0906401	0.428499
Cytochrome c1, heme protein, mitochondrial	Cyc1	-0.807855	0.0457201	0.0902184	0.581775
Proteasome assembly chaperone 1	Psmg1	-0.157943	0.607234	0.0900246	0.410305
Eukaryotic initiation factor 4A-III;Eukaryotic initiation factor 4A-III, N-terminally processed	Eif4a3;Gm8994	0.102545	0.33866	0.0898195	0.43755
SH3 and PX domain-containing protein 2B	Sh3pxd2b	0.368829	0.00812162	0.0890388	0.505458
Glomulin	Glmn	0.096902	0.793054	0.0888528	0.346292
AP-1 complex subunit gamma-like 2	Ap1g2	0.158422	0.133478	0.0875001	0.510399
Lysine--tRNA ligase	Kars	-0.90247	0.537278	0.0864133	0.582311
Multifunctional protein ADE2;Phosphoribosylaminoimidazole-succinocarboxamide synthase;Phosphoribosylaminoimidazole carboxylase	Paics	0.256685	0.0395607	0.0860586	0.340199
Eukaryotic translation initiation factor 3 subunit D	Eif3d	0.107792	0.27299	0.0854523	0.414183
Sorting and assembly machinery component 50 homolog	Samm50	0.373481	0.0114616	0.0843957	0.661397
Synaptosomal-associated protein 47	Snap47	-0.0191785	0.863933	0.083608	0.510701
60S ribosomal protein L4	Rpl4	-0.257487	0.0815317	0.0830359	0.718463
Long-chain fatty acid transport protein 1	Slc27a1	-0.287527	0.474044	0.082772	0.829522
Inosine-5-monophosphate dehydrogenase 2	Impdh2	-0.399781	0.468051	0.0803498	0.659099
Aminopeptidase B	Rnpep	-0.121151	0.939796	0.0789217	0.600595
Importin subunit alpha-5;Importin subunit alpha-5, N-terminally processed	Kpna1	-0.483483	0.0157856	0.0785687	0.47935
Heterogeneous nuclear ribonucleoprotein A3	Gm6793;Hnrnpa3	-1.16961	0.00134712	0.0783584	0.799269
Asparagine synthetase [glutamine-hydrolyzing]	Asns	0.243254	0.0416053	0.0781909	0.587927
Myeloid leukemia factor 2	Mlf2	0.619742	0.00090341	0.076788	0.615441
Proteasome subunit alpha type-3	Psma3	0.345067	0.0179449	0.0766805	0.699841
Non-POU domain-containing octamer-binding protein	Nono	-0.414497	0.0096655	0.0754877	0.431926
Zinc finger protein 622	Znf622	0.120958	0.375762	0.0754186	0.767942
WD repeat-containing protein 81	Wdr81	0.0271338	0.885835	0.0727557	0.4637
T-complex protein 1 subunit alpha	Tcp1	0.0878716	0.348018	0.071526	0.58713
Phosphoinositide 3-kinase adapter protein 1	Pik3ap1	-0.721737	0.00410868	0.0686628	0.531195
Serine-threonine kinase receptor-associated protein	Strap	0.213562	0.0574177	0.0679685	0.594164
Pescadillo homolog	Pes1	-0.0571436	0.706959	0.0657039	0.513712
Ras GTPase-activating protein-binding protein 1	G3bp1	-0.331121	0.0242052	0.0651007	0.58111
Cytosolic phospholipase A2;Phospholipase A2;Lysophospholipase	Pla2g4a	-0.379014	0.0128785	0.064988	0.460904
Heat shock protein HSP 90-alpha	Hsp90aa1	-0.0419216	0.76545	0.064222	0.545401
GTP-binding protein Rheb	Rheb	-0.257977	0.0292265	0.0638927	0.544027
Transcription factor HIVEP2	Hivep2	0.0882051	0.928485	0.0637046	0.555678
T-complex protein 1 subunit beta	Cct2	0.0354187	0.843156	0.0615368	0.498068
Misshapen-like kinase 1	Mink1	0.324633	0.0162869	0.061149	0.600886
Unconventional myosin-Va	Myo5a	-0.103057	0.367309	0.0610939	0.556039
26S protease regulatory subunit 7	Psmc2	-0.0210662	0.864219	0.0604506	0.676432
Eukaryotic translation initiation factor 3 subunit L	Eif3l	-0.817153	0.00124517	0.0597889	0.553932
Coiled-coil domain-containing protein 93	Ccdc93	0.123426	0.353726	0.0588091	0.574053
ATP-dependent RNA helicase Dhx29	Dhx29	0.319024	0.0849396	0.057725	0.789224
Nuclear-interacting partner of ALK	Zc3hc1	-1.16675	0.282717	0.0576664	0.798695
	Wdr36	0.286303	0.0140253	0.0570906	0.5875
	Mdn1	0.0895191	0.488288	0.0557134	0.618996
E3 ubiquitin-protein ligase UBR4	Ubr4	0.299774	0.117712	0.0554434	0.541687
Coronin-1A;Coronin	Coro1a	-0.497715	0.0591622	0.055127	0.799397
Protein Hook homolog 3	Hook3	1.14688	0.0179642	0.0551111	0.735845
N-acylglucosamine 2-epimerase	Renbp	-0.257199	0.352343	0.054298	0.687964
Plasma membrane calcium-transporting ATPase 1;Calcium-transporting ATPase	Atp2b1;Atp2b4	2.60582	0.00215396	0.0542009	0.57854
40S ribosomal protein SA	Rpsa	0.358379	0.0188477	0.0538949	0.686856
Dedicator of cytokinesis protein 2	Dock2	-0.0450838	0.572761	0.0521462	0.622453
Protein CIP2A	C330027C09Rik;Kiaa1524	-0.0635683	0.529458	0.0515411	0.626121
STAM-binding protein	Stambp	0.128676	0.81077	0.0512344	0.700443
Phosphatidylinositol-binding clathrin assembly protein	Picalm	-0.199004	0.120312	0.0512248	0.73092
Protein THEM6	Them6	0.217835	0.427988	0.049126	0.669708
Proteasome subunit alpha type-4;Proteasome subunit alpha type	Psma4	0.218135	0.218721	0.0487294	0.597494
Nischarin	Nisch	0.125128	0.312474	0.0480229	0.73171
Serine/threonine-protein kinase Chk1	Chek1	0.121174	0.344023	0.0477856	0.719585
Guanine nucleotide-binding protein G(i) subunit alpha-2	Gnai2	-0.746862	0.300274	0.0472784	0.691076
IQ motif and SEC7 domain-containing protein 1	Iqsec1	0.0632458	0.518549	0.0470248	0.670148
Catenin beta-1	Ctnnb1	0.0271045	0.975425	0.0467406	0.884326
ATP-dependent RNA helicase DDX18	Ddx18	-0.151718	0.148419	0.0452847	0.653258
Centrin-2	Cetn2	0.0752371	0.483096	0.0429779	0.872041
Developmentally-regulated GTP-binding protein 1	Drg1	0.14942	0.301935	0.0413292	0.740103
RING finger protein 219	Rnf219	0.505498	0.00357821	0.0397076	0.728142
Proteasome subunit beta type-4	Psmb4	-0.161324	0.235886	0.0396788	0.776375
26S proteasome non-ATPase regulatory subunit 2	Psmd2	0.0866	0.462491	0.0383865	0.844855
Kinetochore-associated protein 1	Kntc1	0.415647	0.0108773	0.0367536	0.87465
DnaJ homolog subfamily B member 11	Dnajb11	0.901948	0.142584	0.0367026	0.844338
Probable ATP-dependent RNA helicase DDX56	Ddx56	0.708126	0.483096	0.0361778	0.710521
	Rasal2	0.0407608	0.642537	0.0358761	0.758498
Girdin	Ccdc88a	-0.0317381	0.790252	0.0351472	0.851468
Bax inhibitor 1	Tmbim6	0.203028	0.740218	0.0343243	0.733099
Annexin A2;Annexin	Anxa2	-0.248184	0.526205	0.0338791	0.767148
Leucine-rich repeat-containing protein 41	Lrrc41	0.00131851	0.993221	0.0303079	0.873216
Striatin-interacting protein 1	Strip1	0.356806	0.0626514	0.0286502	0.810297
Proteasome subunit beta type-1	Psmb1	0.433643	0.492909	0.0285493	0.883851
40S ribosomal protein S18	Gm10260;Rps18	0.41878	0.00651574	0.0273519	0.86939
Serine/threonine-protein phosphatase 6 regulatory subunit 3	Ppp6r3	0.116061	0.525111	0.0272951	0.857036
Heterogeneous nuclear ribonucleoproteins A2/B1	Hnrnpa2b1	-1.01745	0.00583952	0.0271015	0.936288
RuvB-like 2	Ruvbl2	-0.0701204	0.487346	0.0270436	0.798533
Annexin A5	Anxa5	-1.67761	0.00640623	0.0259331	0.896391
Moesin	Msn	-0.60754	0.029497	0.0251944	0.83017
WD repeat-containing protein 3	Wdr3	-0.0268477	0.854575	0.0242727	0.899794
DNA-directed RNA polymerases I, II, and III subunit RPABC3	Polr2h	-0.460566	0.0126214	0.0235064	0.874159
Kinesin-like protein KIF15	Kif15	0.0181484	0.861704	0.023081	0.831953
DNA-directed RNA polymerase I subunit RPA1	Polr1a	0.7426	0.00928769	0.0227389	0.905513
Amino acid transporter;Neutral amino acid transporter B(0)	Slc1a5	0.034198	0.772513	0.0221841	0.897172
Aminoacyl tRNA synthase complex-interacting multifunctional protein 1;Endothelial monocyte-activating polypeptide 2	Aimp1	0.181742	0.343459	0.0218844	0.825652
26S protease regulatory subunit 6B	Psmc4	0.108772	0.20358	0.0214017	0.813102
Anaphase-promoting complex subunit 1	Anapc1	-0.239729	0.109514	0.0209724	0.882874
Cytoplasmic dynein 1 light intermediate chain 1	Dync1li1	0.523838	0.00745429	0.0190184	0.916481
Proteasome subunit beta type-3	Psmb3	0.721863	0.407913	0.0189493	0.956065
Interleukin-1 receptor-associated kinase-like 2	Irak2	0.502358	0.602613	0.018914	0.857036
Wiskott-Aldrich syndrome protein homolog	Was	-0.351322	0.162737	0.0167778	0.868517
	Sec24b	-0.10989	0.301935	0.0138433	0.92204
Tumor susceptibility gene 101 protein	Tsg101	0.406842	0.00557353	0.013164	0.893894
Nuclear factor NF-kappa-B p105 subunit;Nuclear factor NF-kappa-B p50 subunit	Nfkb1	-0.665091	0.0241389	0.0099291	0.953305
Mitofusin-1	Mfn1	-0.220354	0.712096	0.00861921	0.960622
Eukaryotic translation elongation factor 1 epsilon-1	Eef1e1	-0.135633	0.344701	0.00778945	0.969231
Kinesin-like protein KIF11	Kif11	0.207875	0.0567341	0.00768202	0.941593
Elongation factor 2	Eef2	-0.11096	0.30162	0.00672573	0.966021
Protein phosphatase 1 regulatory subunit 15B	Ppp1r15b	-0.00358636	0.989244	0.00421983	0.978545
	Gps2	0.272554	0.456378	0.0037984	0.997827
Small nuclear ribonucleoprotein-associated protein B;Small nuclear ribonucleoprotein-associated protein N	Snrpb;Snrpn	0.0277361	0.849239	0.00208109	0.986478
PDZ and LIM domain protein 5	Pdlim5	-0.235827	0.492657	0.00190584	0.987029
Pre-mRNA-splicing factor 38A	Prpf38a	-0.328296	0.0416053	0.000115259	0.999618
Eukaryotic translation initiation factor 3 subunit I	Eif3i	-0.581984	0.0012886	-0.000346487	0.997827
26S protease regulatory subunit 6A	Psmc3	-0.162304	0.229972	-0.0011575	0.994396
Unconventional myosin-IXb	Myo9b	0.0718154	0.572265	-0.00198048	0.989487
Actin-related protein 2/3 complex subunit 3	Arpc3	0.504036	0.0167865	-0.00542525	0.988796
Ubiquitin conjugation factor E4 B	Ube4b	0.347128	0.0199134	-0.00574064	0.981744
	Slfn9	-0.00557142	0.973351	-0.00695778	0.956065
Macrophage colony-stimulating factor 1 receptor	Csf1r	0.244972	0.489967	-0.00917008	0.975578
Cyclin-dependent kinase 9	Cdk9	-0.456194	0.00293762	-0.0144293	0.943161
Kinesin-like protein KIF22	Kif22	-0.0360093	0.772598	-0.0165812	0.888637
Renin receptor	Atp6ap2	-0.16097	0.364112	-0.0180262	0.885339
Protein pelota homolog	Pelo	-0.479374	0.515555	-0.0185376	0.956065
Probable 28S rRNA (cytosine-C(5))-methyltransferase	Nop2	-0.802724	0.00123419	-0.0194218	0.827485
Vacuolar protein sorting-associated protein 11 homolog	Vps11	-0.0384734	0.940951	-0.0222091	0.970006
Protein FRG1	Frg1	0.0199913	0.828602	-0.0223267	0.902729
Rho guanine nucleotide exchange factor 7	Arhgef7	0.233044	0.0408898	-0.0238865	0.831328
DNA damage-binding protein 1	Ddb1	0.373696	0.279838	-0.025286	0.923433
ATP-binding cassette sub-family G member 1	Abcg1	0.308483	0.0526515	-0.0284117	0.876089
Proto-oncogene c-Fos	Fos	-1.18866	0.0769746	-0.0294808	0.945154
Kinetochore protein Spc24	Spc24	0.823183	0.240752	-0.0296894	0.881842
Folliculin-interacting protein 2	Fnip2	-1.96662	0.105178	-0.0297946	0.909761
26S protease regulatory subunit 10B	Psmc6	-0.166314	0.222975	-0.0312739	0.740103
Intersectin-2	Itsn2	-0.091324	0.385663	-0.0319774	0.782641
SCY1-like protein 2	Scyl2	1.7953	0.137332	-0.0320525	0.939345
BMP-2-inducible protein kinase	Bmp2k	0.258608	0.481884	-0.0323724	0.77746
Serine/threonine-protein kinase 38	Stk38	-2.367	0.0767153	-0.0324121	0.905816
HAUS augmin-like complex subunit 7	Haus7	-0.143159	0.456378	-0.0324471	0.758838
Structural maintenance of chromosomes protein 6	Smc6	1.79263	0.096993	-0.0330005	0.762319
Peptidyl-prolyl cis-trans isomerase A;Peptidyl-prolyl cis-trans isomerase A, N-terminally processed;Peptidyl-prolyl cis-trans isomerase	Ppia;Gm5160	0.0864604	0.695344	-0.0347953	0.953274
Mitogen-activated protein kinase kinase kinase 5	Map3k5	-0.0670841	0.677167	-0.0354255	0.87459
Nuclear factor of activated T-cells, cytoplasmic 2	Nfatc2	-0.221509	0.845479	-0.0358863	0.702284
Vasodilator-stimulated phosphoprotein	Vasp	0.0620387	0.734959	-0.0364075	0.725823
Tensin-3	Tns3	0.0904368	0.365791	-0.03666	0.668718
MICAL-like protein 2	Micall2	0.0414808	0.65807	-0.0371456	0.686086
Mitogen-activated protein kinase kinase kinase kinase 4	Map4k4	-0.264316	0.427988	-0.0386467	0.834672
Inhibitor of nuclear factor kappa-B kinase subunit beta	Ikbkb	0.206462	0.455941	-0.0399593	0.839226
Retinoblastoma-like protein 1	Rbl1	0.499255	0.411688	-0.040622	0.868422
U6 snRNA-associated Sm-like protein LSm8	Lsm8	-1.01207	0.0945206	-0.0409002	0.93046
AP-3 complex subunit delta-1	Ap3d1	-0.295517	0.0153431	-0.0414146	0.781839
DNA polymerase delta catalytic subunit;DNA polymerase	Pold1	-0.0819349	0.393861	-0.0416103	0.721712
MARCKS-related protein	Marcksl1	0.301988	0.0755209	-0.041885	0.970672
TBC1 domain family member 15	Tbc1d15	-0.188158	0.132729	-0.0429578	0.704275
Tumor necrosis factor receptor superfamily member 1B	Tnfrsf1b	-1.26321	0.123102	-0.0464503	0.902459
26S proteasome non-ATPase regulatory subunit 1	Psmd1	0.0240899	0.869567	-0.0479362	0.762537
General transcription factor IIH subunit 4	Gtf2h4	-0.130177	0.628458	-0.0487885	0.735146
Dedicator of cytokinesis protein 8	Dock8	-0.0879735	0.3807	-0.0489219	0.619255
Tyrosine-protein kinase SgK223	Sgk223	-0.217771	0.427988	-0.0492042	0.762537
Sorting nexin-3	Snx3	-0.473548	0.0237092	-0.0493802	0.815291
Proteasome subunit beta type-5	Psmb5	0.4877	0.182927	-0.0505701	0.85435
Proteasome subunit beta type-7	Psmb7	-0.365576	0.41564	-0.0513179	0.59433
Replication factor C subunit 3	Rfc3	-0.448277	0.0322065	-0.0536668	0.831953
S-phase kinase-associated protein 1	Skp1;Skp1a	-0.389157	0.0128255	-0.0541442	0.945154
ATP-citrate synthase	Acly	-0.589662	0.0037726	-0.0572387	0.748387
NADH-cytochrome b5 reductase 1	Cyb5r1	0.211639	0.679587	-0.0574906	0.810596
Valine--tRNA ligase	Vars	-0.384483	0.00868816	-0.0575948	0.63307
Centrosomal protein of 78 kDa	Cep78	-0.0889527	0.526205	-0.0576871	0.69347
Baculoviral IAP repeat-containing protein 6	Birc6	-0.644195	0.00629665	-0.0579477	0.683637
V-type proton ATPase catalytic subunit A	Atp6v1a	-0.0048953	0.958575	-0.0589386	0.580416
Golgi to ER traffic protein 4 homolog	Get4	0.0165308	0.973351	-0.0619278	0.704275
Protein MON2 homolog	Mon2	-0.324428	0.050415	-0.0638015	0.750434
Coiled-coil domain-containing protein 22	Ccdc22	0.54325	0.00291911	-0.0654958	0.47385
Serine/threonine-protein kinase 3;Serine/threonine-protein kinase 3 36kDa subunit;Serine/threonine-protein kinase 3 20kDa subunit	Stk3	-0.0920588	0.564373	-0.0658535	0.669708
Transcription elongation factor B polypeptide 1	Tceb1	-2.4195	0.0407959	-0.0660979	0.63598
Zinc finger protein 281	Znf281	-0.0724121	0.904048	-0.0666313	0.857544
Large proline-rich protein BAG6	Bag6	-0.43413	0.44751	-0.0674414	0.665609
Signal transducer and activator of transcription 3;Signal transducer and activator of transcription	Stat3	0.0668847	0.479738	-0.06813	0.622453
F-box/WD repeat-containing protein 8	Fbxw8	-0.0873648	0.835007	-0.0681366	0.633082
DNA replication licensing factor MCM3	Mcm3	-0.213927	0.156169	-0.0685133	0.599498
Interleukin-1 receptor-associated kinase 1;Serine/threonine-protein kinase Nek2	Irak1;Nek2	-0.24656	0.717695	-0.0688726	0.699585
GA-binding protein alpha chain	Gabpa	-1.52491	0.0403136	-0.0702064	0.833519
Mitotic spindle-associated MMXD complex subunit MIP18	Fam96b	0.53993	0.068486	-0.0703986	0.621424
Ribonucleoside-diphosphate reductase subunit M2	Rrm2	-0.142097	0.617066	-0.073711	0.851667
Gamma-parvin	Parvg	-0.393243	0.0698862	-0.0739501	0.642963
Lamin-B1	Lmnb1	-0.0284466	0.832119	-0.0747213	0.400813
Phosphoinositide phospholipase C	Plcb4	0.989522	0.196691	-0.0755753	0.689249
Protein SGT1 homolog	Ecd	-0.281754	0.0720798	-0.0757211	0.725823
Nucleoporin NUP188 homolog	Nup188	0.0779096	0.575809	-0.0761319	0.502323
TBC1 domain family member 5	Tbc1d5	-0.771343	0.367451	-0.0788463	0.374998
Solute carrier organic anion transporter family member 4A1	Slco4a1	-0.227462	0.281601	-0.0789434	0.655869
Pleckstrin	Plek	0.226232	0.11095	-0.0824869	0.825906
Thymidine kinase, cytosolic	Tk1	0.18445	0.124752	-0.08279	0.644894
Dedicator of cytokinesis protein 10	Dock10	-0.289321	0.303242	-0.0829473	0.706491
Induced myeloid leukemia cell differentiation protein Mcl-1 homolog	Mcl1	-0.377075	0.0212547	-0.083455	0.351289
Diphthine--ammonia ligase	Dph6	0.412223	0.422992	-0.0838188	0.763986
Vacuolar protein sorting-associated protein 51 homolog	Vps51	-0.0310505	0.847358	-0.0878303	0.670148
Disabled homolog 2	Dab2	0.203588	0.0607037	-0.0883659	0.4254
	Rapgef6	-0.0984485	0.423009	-0.0907019	0.395601
Vacuolar protein-sorting-associated protein 36	Vps36	0.832744	0.125401	-0.0938549	0.917902
Inositol 1,4,5-trisphosphate receptor type 3	Itpr3	0.0412582	0.893053	-0.0961252	0.6605
Nuclear pore glycoprotein p62	Nup62	-0.386886	0.0226029	-0.0972576	0.61356
Peptidyl-prolyl cis-trans isomerase FKBP8	Fkbp8	-0.0594179	0.914428	-0.0975469	0.449164
3-ketodihydrosphingosine reductase	Kdsr	-0.428707	0.0855764	-0.0982464	0.85859
Nucleolar protein 56	Nop56	-0.682524	0.0635485	-0.0986539	0.5889
BRCA1-A complex subunit BRE	Bre	0.0434079	0.772513	-0.0987551	0.542092
F-actin-capping protein subunit alpha-2	Capza2	0.256799	0.0671132	-0.0993226	0.555678
Extended synaptotagmin-1	Esyt1	-1.12789	0.204151	-0.099881	0.440417
ATP-dependent zinc metalloprotease YME1L1	Yme1l1	-0.0628987	0.876018	-0.10018	0.38517
Transmembrane glycoprotein NMB	Gpnmb	-0.133342	0.752779	-0.100329	0.807964
BAG family molecular chaperone regulator 2	Bag2	0.336965	0.139523	-0.100699	0.500348
Short transient receptor potential channel 4-associated protein	Trpc4ap	0.573571	0.119019	-0.101159	0.825652
Tumor necrosis factor alpha-induced protein 2	Tnfaip2	-0.197122	0.0902836	-0.105015	0.398118
Nuclear protein localization protein 4 homolog	Nploc4	0.651918	0.275033	-0.105351	0.804951
DBIRD complex subunit ZNF326	Znf326;Zfp326	-0.237416	0.196838	-0.105388	0.300782
DNA topoisomerase 3-beta-1	Top3b	0.446625	0.0104324	-0.106715	0.613253
Docking protein 3	Dok3	-0.350834	0.00761767	-0.108726	0.50952
Cyclic AMP-responsive element-binding protein 3;Processed cyclic AMP-responsive element-binding protein 3	Creb3	0.34503	0.174924	-0.112274	0.685505
Protein O-GlcNAcase	Mgea5	0.148611	0.712096	-0.113044	0.312072
Rho GTPase-activating protein 25	Arhgap25	-0.108267	0.429163	-0.113562	0.60859
Ribonuclease P protein subunit p30	Rpp30	-0.256037	0.268048	-0.114044	0.613253
RuvB-like 1	Ruvbl1	-0.242202	0.412013	-0.114083	0.449164
Calcyclin-binding protein	Cacybp	1.71619	0.109393	-0.114229	0.344241
Spliceosome RNA helicase Ddx39b	Ddx39b	-0.4474	0.445441	-0.114691	0.59475
Nuclear pore complex protein Nup107	Nup107	-0.592705	0.0232258	-0.114849	0.311339
CD44 antigen	Cd44	-1.26031	0.2667	-0.118413	0.750307
Eukaryotic translation initiation factor 3 subunit B	Eif3b	-0.648572	0.00077876	-0.12085	0.255493
3-hydroxy-3-methylglutaryl coenzyme A reductase;3-hydroxy-3-methylglutaryl-coenzyme A reductase	Hmgcr	-1.50015	0.193281	-0.12212	0.548797
Sister chromatid cohesion protein PDS5 homolog A	Pds5a	-0.315802	0.0383808	-0.122445	0.605438
Signal recognition particle 54 kDa protein	Srp54;Srp54c	-0.207234	0.185568	-0.123075	0.343735
Talin-1	Tln1	0.279858	0.0134895	-0.123523	0.430276
Nuclear pore complex protein Nup214	Nup214	-0.280156	0.0182917	-0.125282	0.213362
NADH dehydrogenase [ubiquinone] 1 alpha subcomplex subunit 8	Ndufa8	0.113979	0.902123	-0.125786	0.888076
Leucine zipper protein 1	Luzp1	0.128579	0.143387	-0.125976	0.215858
Ubiquitin carboxyl-terminal hydrolase;Ubiquitin carboxyl-terminal hydrolase 24	Usp24	0.232131	0.140939	-0.126151	0.487651
Monocyte differentiation antigen CD14	Cd14	-1.28601	0.248422	-0.1264	0.592041
Sterol O-acyltransferase 1	Soat1	-0.0322938	0.800652	-0.129854	0.526215
Phenylalanine--tRNA ligase alpha subunit	Farsa	0.575834	0.219001	-0.129955	0.436194
Thyroid adenoma-associated protein homolog	Thada	-0.276445	0.220534	-0.130088	0.415212
Cell division cycle protein 23 homolog	Cdc23	-0.781849	0.00575929	-0.131774	0.317819
E3 ubiquitin-protein ligase HECTD1	Hectd1	0.0581033	0.579448	-0.132606	0.615441
Dynamin-1-like protein	Dnm1l	-0.204727	0.0393237	-0.138264	0.197858
Sodium-dependent phosphate transporter 1	Slc20a1	0.0268949	0.934773	-0.140053	0.599265
Integrator complex subunit 4	Ints4	0.0272969	0.855513	-0.140611	0.628605
H/ACA ribonucleoprotein complex subunit 4	Dkc1	-1.39605	0.0416053	-0.142017	0.743921
Trafficking protein particle complex subunit 11	Trappc11	0.812599	0.218721	-0.142096	0.201877
Kinesin-like protein;Centromere-associated protein E	Cenpe	0.461074	0.012129	-0.142676	0.351289
Pseudopodium-enriched atypical kinase 1	Peak1	-0.189922	0.0671072	-0.145001	0.18983
Heterogeneous nuclear ribonucleoprotein Q	Syncrip	-0.383476	0.489967	-0.145883	0.902729
Replication factor C subunit 4	Rfc4	-0.850679	0.0114552	-0.147416	0.225406
Rho guanine nucleotide exchange factor 6	Arhgef6	0.210378	0.0382108	-0.14812	0.163675
Cyclin-G-associated kinase	Gak	-0.0515871	0.706687	-0.148819	0.357176
Proteasome subunit beta type-6	Psmb6	-0.278423	0.611619	-0.150478	0.505458
Enhancer of mRNA-decapping protein 4	Edc4	-0.37409	0.00722542	-0.151095	0.127794
60S ribosomal protein L27	Rpl27	-0.583405	0.00463831	-0.151171	0.216796
Calcium-binding mitochondrial carrier protein SCaMC-1	Slc25a24	0.0559555	0.951987	-0.152253	0.740103
Hypoxanthine-guanine phosphoribosyltransferase	Hprt1	-0.064736	0.924749	-0.154375	0.614709
DENN domain-containing protein 4C	Dennd4c	0.341879	0.0586817	-0.154933	0.383579
60S ribosomal protein L30	Rpl30	-0.49416	0.0588152	-0.157919	0.321868
Protein SEC13 homolog	Sec13	-0.382705	0.107056	-0.158285	0.233743
Inositol hexakisphosphate and diphosphoinositol-pentakisphosphate kinase 2;Inositol hexakisphosphate and diphosphoinositol-pentakisphosphate kinase 1	Ppip5k2;Ppip5k1	0.485853	0.505213	-0.159931	0.50952
CTTNBP2 N-terminal-like protein	Cttnbp2nl	-0.166985	0.209421	-0.160942	0.321144
Transitional endoplasmic reticulum ATPase	Vcp	-1.45228	0.000359825	-0.162048	0.314286
Eukaryotic translation initiation factor 3 subunit A	Eif3a	-0.861885	0.000183488	-0.162795	0.0910278
Nuclear pore complex protein Nup54	Nup54	-0.784012	0.0235879	-0.163924	0.295413
DNA primase large subunit	Prim2	0.0144739	0.97629	-0.164468	0.629865
Eukaryotic translation initiation factor 3 subunit G	Eif3g	-0.671805	0.00455749	-0.166097	0.222153
Mitotic checkpoint serine/threonine-protein kinase BUB1 beta	Bub1b	-0.207906	0.0682194	-0.167925	0.163675
TRAF family member-associated NF-kappa-B activator	Tank	0.243193	0.0274947	-0.167996	0.302143
Sorting nexin-5	Snx5	-0.0288789	0.779285	-0.171067	0.150536
	Haus6	0.205999	0.0797264	-0.173694	0.210534
Sorting nexin-4	Snx4	0.451315	0.0231413	-0.174099	0.521384
Nuclear pore complex protein Nup98-Nup96;Nuclear pore complex protein Nup98;Nuclear pore complex protein Nup96	Nup98	-0.370322	0.0259367	-0.176385	0.138343
IST1 homolog	Ist1	-0.668356	0.210832	-0.178013	0.766306
NudC domain-containing protein 3	Nudcd3	0.0803866	0.725084	-0.178015	0.728142
Kinetochore protein NDC80 homolog	Ndc80	0.502786	0.0281318	-0.178032	0.564039
Nucleoporin NDC1	Ndc1	-1.40927	0.0200276	-0.178855	0.0800896
Mitogen-activated protein kinase 1	Mapk1	0.343518	0.613893	-0.181527	0.327237
Signal recognition particle receptor subunit beta	Gm20425;Srprb	-0.344492	0.0607062	-0.182135	0.170161
Leucine-rich repeat and calponin homology domain-containing protein 4	Lrch4	0.30103	0.0725939	-0.1837	0.185476
ARF GTPase-activating protein GIT1	Git1	0.113228	0.159193	-0.184427	0.143456
Metastasis suppressor protein 1	Mtss1	0.0795533	0.579516	-0.184591	0.124728
Phosphoserine aminotransferase	Psat1	-0.429795	0.0447341	-0.185865	0.627514
SHC SH2 domain-binding protein 1	Shcbp1	-0.274727	0.0587082	-0.186001	0.0819603
RUN and FYVE domain-containing protein 1	Rufy1	0.223088	0.0979401	-0.186865	0.143339
Src kinase-associated phosphoprotein 2	Skap2	-0.259703	0.04827	-0.19165	0.410305
Bromodomain adjacent to zinc finger domain protein 1A	Baz1a	-0.438604	0.111599	-0.192538	0.245162
Transcription elongation factor B polypeptide 2	Tceb2	-1.44572	0.171472	-0.194921	0.570374
U1 small nuclear ribonucleoprotein 70 kDa	Snrnp70	-0.381912	0.00708753	-0.195516	0.510399
Next to BRCA1 gene 1 protein	Nbr1	0.603742	0.268782	-0.198788	0.555677
Protein RRP5 homolog	Pdcd11	-1.10816	0.12876	-0.20037	0.196236
Epidermal growth factor receptor substrate 15-like 1	Eps15l1	-0.476038	0.0109652	-0.202287	0.191765
Probable ATP-dependent RNA helicase DDX20	Ddx20	-0.290918	0.17343	-0.202905	0.273699
N-acetyltransferase 10	Nat10	-0.772881	0.000396937	-0.203013	0.108116
26S protease regulatory subunit 8	Psmc5	-0.0222685	0.800937	-0.203186	0.0765011
AP-3 complex subunit beta-1	Ap3b1	-0.402145	0.00507009	-0.206623	0.100494
Serine/threonine-protein kinase VRK2	Vrk2	-0.24747	0.774629	-0.207008	0.787375
Phosphoribosylformylglycinamidine synthase	Pfas	-0.477925	0.0152161	-0.210151	0.176284
Fos-related antigen 1	Fosl1	-5.00184	4.90321e-06	-0.21036	0.673626
Polyamine-modulated factor 1	Pmf1	-0.248713	0.811962	-0.213112	0.26835
Dual specificity protein kinase CLK3	Clk3	0.274742	0.0451098	-0.214918	0.1021
Uncharacterized aarF domain-containing protein kinase 1	Adck1	0.156612	0.227361	-0.216216	0.745005
La-related protein 1	Larp1	-0.163801	0.074457	-0.218026	0.205327
Integrin alpha-4	Itga4	-0.744525	0.407019	-0.218211	0.405786
Lymphocyte cytosolic protein 2	Lcp2	0.00565325	0.965235	-0.221134	0.241595
AMP deaminase 3	Ampd3	-0.70761	0.0517262	-0.221155	0.163701
Protein LAP2	Erbb2ip	0.198837	0.107213	-0.226737	0.119446
Eukaryotic translation initiation factor 2A;Eukaryotic translation initiation factor 2A, N-terminally processed	Eif2a	-0.00257376	0.987154	-0.226867	0.0906934
Elongation factor 1-gamma	Eef1g	-0.538549	0.00467744	-0.231945	0.0885012
Acid sphingomyelinase-like phosphodiesterase 3b	Smpdl3b	-1.20025	0.320048	-0.232715	0.102253
E3 ubiquitin-protein ligase RBX1;E3 ubiquitin-protein ligase RBX1, N-terminally processed	Rbx1	-0.567372	0.066806	-0.232822	0.120776
Serine/threonine-protein phosphatase PGAM5, mitochondrial	Pgam5	-1.07782	0.000106712	-0.233175	0.226332
HAUS augmin-like complex subunit 8	Haus8	0.0526937	0.482869	-0.235762	0.307334
FH1/FH2 domain-containing protein 1	Fhod1	-0.0325904	0.84938	-0.236524	0.216259
Copine-8	Cpne8	-0.722343	0.355927	-0.243997	0.291777
Protein EMSY	Emsy	-1.16303	0.0021438	-0.247631	0.266225
SH2B adapter protein 2	Sh2b2	0.35316	0.0694921	-0.248018	0.319287
Interferon-induced transmembrane protein 3	Ifitm3	0.00460321	0.982588	-0.249078	0.0397476
Dynein light chain 1, cytoplasmic	Dynll1	-0.485205	0.0203349	-0.254543	0.0522045
Tyrosine-protein kinase Lyn	Lyn	-1.82181	0.103572	-0.260034	0.32597
Protein SON	Son	-1.65299	0.00113011	-0.260624	0.425652
Nuclear pore complex protein Nup88	Nup88	-0.255447	0.0230177	-0.26505	0.0626322
	Cep350	-0.138354	0.68856	-0.266034	0.0610324
MKL/myocardin-like protein 1	Mkl1	-0.60127	0.256407	-0.267548	0.138343
Heat shock cognate 71 kDa protein	Hspa8	-0.070374	0.480598	-0.268304	0.075578
Amidophosphoribosyltransferase	Ppat	0.0639869	0.693423	-0.268828	0.379238
Iporin	Rusc2	-0.474365	0.56536	-0.269415	0.143456
Cleavage and polyadenylation specificity factor subunit 6	Cpsf6	-1.18786	0.00102105	-0.269861	0.322355
Eukaryotic translation initiation factor 2 subunit 2	Eif2s2	-1.01492	0.00397821	-0.271098	0.154631
Coatomer subunit epsilon	Cope	0.26251	0.14349	-0.276946	0.152902
5-3 exoribonuclease 2	Xrn2	-0.223711	0.0538605	-0.278157	0.0202806
Replication factor C subunit 2	Rfc2	-0.107429	0.55086	-0.278844	0.0908031
Krueppel-like factor 6	Klf6	-0.260519	0.718287	-0.280152	0.677891
Anion exchange protein;Sodium bicarbonate cotransporter 3	Slc4a7	-1.14845	0.077874	-0.283345	0.362893
Eukaryotic translation initiation factor 3 subunit H	Eif3h	-1.10874	0.000533685	-0.285354	0.330487
Structural maintenance of chromosomes protein 5	Smc5	-1.67327	0.003702	-0.285794	0.762541
Septin-2	Sept2	-0.100448	0.284406	-0.28624	0.0282463
Transketolase	Tkt	-0.732845	0.000971405	-0.287246	0.0389764
Core histone macro-H2A.1	H2afy	-0.581226	0.340396	-0.287914	0.677891
Eukaryotic translation initiation factor 4 gamma 1	Eif4g1	-0.183009	0.0695014	-0.29073	0.0258104
Lysophosphatidylcholine acyltransferase 1	Lpcat1	-0.349238	0.0896419	-0.291766	0.0204705
Serine/threonine-protein phosphatase 6 regulatory subunit 1	Ppp6r1	-0.348055	0.0435333	-0.292217	0.0177847
AP2-associated protein kinase 1	Aak1	-0.318694	0.241794	-0.293022	0.07987
Small nuclear ribonucleoprotein Sm D3	Snrpd3	-0.953377	0.0076088	-0.293121	0.0905989
Serine/threonine-protein kinase WNK1	Wnk1	0.188674	0.0663076	-0.293891	0.0228473
STE20-like serine/threonine-protein kinase	Slk	-0.135814	0.150521	-0.294466	0.034559
DNA (cytosine-5)-methyltransferase 1;DNA (cytosine-5)-methyltransferase	Dnmt1	-0.202303	0.301935	-0.299776	0.0558847
Phosphoglycerate mutase 1;Phosphoglycerate mutase 2	Pgam1;Pgam2	-0.415224	0.325646	-0.304498	0.332326
Immediate early response gene 5 protein	Ier5	0.184658	0.671083	-0.30519	0.079132
	Eif4g2	-0.0653594	0.431495	-0.310211	0.0201193
Formin-binding protein 1	Fnbp1	-0.325213	0.136849	-0.312383	0.0712997
U4/U6 small nuclear ribonucleoprotein Prp31	Prpf31	-0.551359	0.00237583	-0.312436	0.0605331
GTPase-activating protein and VPS9 domain-containing protein 1	Gapvd1	-0.386745	0.0315006	-0.313571	0.0530819
LIM domain-containing protein 1	Limd1	0.0431259	0.701014	-0.314078	0.0779243
Fructose-2,6-bisphosphatase TIGAR	Tigar	-0.298653	0.106132	-0.31748	0.0754365
Macrophage-capping protein	Capg	-0.4609	0.00237583	-0.318184	0.0943037
ADP-ribosylation factor GTPase-activating protein 2	Arfgap2	-0.0899866	0.547551	-0.318491	0.0386906
Protein phosphatase 1 regulatory subunit 12A	Ppp1r12a	-1.07157	0.010475	-0.319102	0.151824
E3 ubiquitin-protein ligase TRIM32	Trim32	1.37081	0.109815	-0.320068	0.541306
ARF GTPase-activating protein GIT2	Git2	0.0475941	0.788547	-0.324272	0.120425
Heterogeneous nuclear ribonucleoproteins C1/C2	Hnrnpc	-1.67238	0.0137488	-0.325171	0.100638
Ubiquitin carboxyl-terminal hydrolase 47	Usp47	-0.56246	0.0357139	-0.325391	0.329454
Protein FAM134B	Fam134b	-1.61847	0.0316115	-0.326112	0.579576
Importin subunit beta-1	Kpnb1	-0.655791	0.00090118	-0.326607	0.0116213
Serine/threonine-protein kinase 4;Serine/threonine-protein kinase 4 37kDa subunit;Serine/threonine-protein kinase 4 18kDa subunit	Stk4	-0.227195	0.0315006	-0.327759	0.0351634
Phosphatidylinositol 3,4,5-trisphosphate 5-phosphatase 2	Inppl1	0.21425	0.379712	-0.331252	0.0509959
	Nav2	0.0312619	0.861704	-0.336127	0.131274
TGF-beta-activated kinase 1 and MAP3K7-binding protein 2	Tab2	1.90789	0.0147355	-0.338599	0.610621
Probable ATP-dependent RNA helicase DDX41	Ddx41	-0.616648	0.0355577	-0.340771	0.012855
Mitogen-activated protein kinase 6	Mapk6	-1.48038	0.0738777	-0.341174	0.0331375
G2 and S phase-expressed protein 1	Gtse1	-0.146068	0.113611	-0.341436	0.0722932
Proto-oncogene c-Rel	Rel	-1.01741	0.00575929	-0.34223	0.0591849
	Ahnak2	0.148363	0.458558	-0.34234	0.0426228
Protein 4.1	Epb4.1;Epb41	-0.416177	0.00938296	-0.344703	0.0230419
Cbp/p300-interacting transactivator 2	Cited2	-0.00502788	0.981273	-0.345083	0.595695
Active breakpoint cluster region-related protein	Abr	-0.320249	0.0293648	-0.345092	0.0103187
Eukaryotic translation initiation factor 3 subunit K	Eif3k	-0.973246	0.207718	-0.348777	0.347002
FERM domain-containing protein 4B	Frmd4b	-0.014305	0.986333	-0.352471	0.221979
LIM and SH3 domain protein 1	Lasp1	-0.279225	0.0350698	-0.352787	0.151777
Deoxyhypusine hydroxylase	Dohh	-0.847164	0.095257	-0.35335	0.274947
Gephyrin;Molybdopterin adenylyltransferase;Molybdopterin molybdenumtransferase	Gphn	-0.14015	0.221688	-0.353608	0.0309529
Condensin-2 complex subunit H2	Ncaph2	-0.234029	0.0535051	-0.354233	0.0408352
SAFB-like transcription modulator	Sltm	-1.92077	0.000367631	-0.355791	0.362618
Importin-7	Ipo7	-0.662433	0.000744101	-0.35658	0.0201193
	Srsf11	-1.49007	5.78608e-05	-0.357722	0.321099
Caprin-1	Caprin1	-0.597323	0.00791635	-0.366461	0.161711
	Ahnak2	0.0737274	0.69663	-0.368948	0.0279418
Recombining binding protein suppressor of hairless	Rbpj	-0.0945574	0.849535	-0.369109	0.460044
A-kinase anchor protein 9	Akap9	-0.416733	0.0945206	-0.370531	0.0207864
SH3 domain-binding protein 2	Sh3bp2	-0.624194	0.55086	-0.373774	0.100361
Heterogeneous nuclear ribonucleoprotein M	Hnrnpm	-0.679736	0.000872381	-0.373987	0.00830853
Protein NDRG1	Ndrg1	-0.449734	0.00598092	-0.375421	0.0368355
Elongator complex protein 1	Ikbkap	-0.28822	0.0221585	-0.375493	0.0131625
60S acidic ribosomal protein P0	Rplp0	-0.903075	0.00155944	-0.382191	0.0424597
Sorting nexin-1	Snx1	-0.49004	0.00402362	-0.382747	0.0672007
Chromatin assembly factor 1 subunit B	Chaf1b	-2.18119	0.00549362	-0.383831	0.0426228
Synaptojanin-1	Synj1	-0.694157	0.0349086	-0.38582	0.0169604
Adenylyl cyclase-associated protein 1	Cap1	-0.484624	0.00288577	-0.385846	0.0651653
Prolow-density lipoprotein receptor-related protein 1;Low-density lipoprotein receptor-related protein 1 85 kDa subunit;Low-density lipoprotein receptor-related protein 1 515 kDa subunit;Low-density lipoprotein receptor-related protein 1 intracellular domain	Lrp1	0.191005	0.350063	-0.386805	0.0255117
T-complex protein 1 subunit theta	Cct8	0.0824257	0.370723	-0.390837	0.00968846
MAP kinase-activating death domain protein	Madd	0.202589	0.068198	-0.391506	0.0158407
Cytospin-B	Specc1	0.169404	0.554709	-0.391924	0.170053
Testin	Tes	-0.40778	0.0725939	-0.392241	0.0753674
DNA excision repair protein ERCC-6-like	Ercc6l	-0.364507	0.0430724	-0.393184	0.0054413
Rho GTPase-activating protein 31	Arhgap31	-0.456548	0.0913427	-0.396004	0.0590461
Cullin-4B	Cul4b	-1.03795	0.000432213	-0.400251	0.0199843
Tyrosine-protein phosphatase non-receptor type 12	Ptpn12	-0.729778	0.00113753	-0.401294	0.0712997
Serine/threonine-protein phosphatase PP1-alpha catalytic subunit	Ppp1ca	-1.27743	6.74051e-05	-0.401644	0.0228065
Septin-11	Sept11	-0.324475	0.0301298	-0.407318	0.0156698
Mitotic checkpoint serine/threonine-protein kinase BUB1	Bub1	-0.342441	0.0233671	-0.408984	0.0246063
Ubiquitin-conjugating enzyme E2 D3	Ube2d3	1.19966	0.0170363	-0.40972	0.679999
Kinesin-like protein;Kinesin-like protein KIF16B	Kif16b	-0.143491	0.138092	-0.411606	0.00981977
General transcription factor IIE subunit 1	Gtf2e1	-0.643873	0.0292491	-0.416833	0.0221019
Lymphoid-restricted membrane protein;Processed lymphoid-restricted membrane protein	Lrmp	0.0327436	0.743041	-0.419538	0.0136113
Mitochondrial inner membrane protein OXA1L	Oxa1l	0.275183	0.135111	-0.419997	0.61585
Mitotic checkpoint protein BUB3	Bub3	-0.494086	0.0134342	-0.420822	0.0535854
Cleavage and polyadenylation specificity factor subunit 5	Nudt21	-1.76086	0.000146241	-0.422619	0.212927
Ran-binding protein 3-like	Ranbp3l	-0.612617	0.00536282	-0.422702	0.0134885
Synaptosomal-associated protein 29	Snap29	-0.300038	0.0233902	-0.438792	0.0393803
Rab GTPase-activating protein 1	Rabgap1	-0.0909807	0.784081	-0.438972	0.0320308
Poly(U)-binding-splicing factor PUF60	Puf60	-1.38834	0.000865647	-0.439657	0.0484486
78 kDa glucose-regulated protein	Hspa5	-0.222021	0.0426901	-0.441021	0.00910612
SURP and G-patch domain-containing protein 2	Sugp2	-1.50448	0.0489886	-0.441484	0.177463
55 kDa erythrocyte membrane protein	Mpp1	-0.43932	0.00574652	-0.444896	0.0219899
FK506-binding protein 15;Peptidyl-prolyl cis-trans isomerase	Fkbp15	-0.0783889	0.359923	-0.446087	0.00499786
Glycylpeptide N-tetradecanoyltransferase 1	Nmt1	-0.6865	0.437278	-0.447903	0.0748819
Pinin	Pnn	-1.43352	0.0199361	-0.448827	0.658621
N-terminal kinase-like protein	Scyl1	-0.477836	0.00289316	-0.450286	0.00626689
Xenotropic and polytropic retrovirus receptor 1	Xpr1	-0.33602	0.736828	-0.451183	0.319673
Kinesin light chain 1	Klc1	0.136227	0.280323	-0.452607	0.123823
SAM and SH3 domain-containing protein 1	Sash1	-0.0675532	0.639835	-0.455506	0.167619
GRIP1-associated protein 1	Gripap1	-0.546874	0.0199361	-0.455865	0.0206208
Germinal-center associated nuclear protein	Mcm3ap	-0.582476	0.00299148	-0.458639	0.0329202
Inner centromere protein	Incenp	0.535825	0.0266795	-0.459942	0.524897
Protein arginine N-methyltransferase 3	Prmt3	-0.0326821	0.907793	-0.463694	0.0688
Plastin-2	Lcp1	-0.75675	0.000884769	-0.466356	0.0629152
Kinesin-1 heavy chain;Kinesin-like protein;Kinesin heavy chain isoform 5C;Kinesin heavy chain isoform 5A	Kif5b;Kif5c;Kif5a	-0.149411	0.156169	-0.471128	0.0221315
X-box-binding protein 1;X-box-binding protein 1, cytoplasmic form;X-box-binding protein 1, luminal form	Xbp1	-0.0928899	0.750373	-0.471295	0.0147357
Switch-associated protein 70	Swap70	-0.0722931	0.391313	-0.471745	0.0342603
DNA-directed RNA polymerase II subunit RPB1	Polr2a	-1.71077	0.00017103	-0.473612	0.0115103
	Myo6	-0.0348815	0.712461	-0.475637	0.0316628
Septin-9	Sept9	-0.245288	0.1035	-0.476792	0.00748925
Deoxynucleoside triphosphate triphosphohydrolase SAMHD1	Samhd1	-1.41812	0.000133337	-0.47809	0.017531
Endophilin-A2	Sh3gl1	-0.49929	0.0270726	-0.479147	0.00704432
Protein NDRG3	Ndrg3	-0.751895	0.00985859	-0.479753	0.213517
Surfeit locus protein 6	Surf6	-1.12862	0.117523	-0.481053	0.0199825
Protein aurora borealis	Bora	-1.08248	0.0395607	-0.483026	0.0102517
Ubiquitin-associated protein 1	Ubap1	0.342473	0.0129387	-0.484725	0.00499695
Splicing factor 3B subunit 3	Sf3b3	-0.545114	0.0188477	-0.485132	0.00375037
Serine/threonine-protein kinase Nek9	Nek9	-0.472759	0.00343846	-0.486293	0.00493283
Signal recognition particle receptor subunit alpha	Srpr	-0.296036	0.0200638	-0.491162	0.0374951
Formin-binding protein 1-like	Fnbp1l	-0.106627	0.421093	-0.493078	0.0177509
	Sec16a	-0.635172	0.00463831	-0.495861	0.00719487
Glycerol kinase	Gyk;Gk;Gykl1	1.77161	0.0695361	-0.49639	0.620573
Acylglycerol kinase, mitochondrial	Agk	2.31673	0.0222029	-0.498296	0.50075
Elongation of very long chain fatty acids protein;Elongation of very long chain fatty acids protein 1	Elovl1	0.295888	0.093682	-0.500424	0.0117382
Protein VAC14 homolog	Vac14	-0.133083	0.261698	-0.504657	0.00818241
Tropomodulin-3	Tmod3	-1.59668	0.0330057	-0.506732	0.0844989
Minor histocompatibility protein HA-1	Hmha1	-0.407287	0.00492711	-0.511241	0.00603212
Sperm-associated antigen 5	Spag5	-0.371369	0.00721333	-0.511618	0.00461505
Protein arginine N-methyltransferase 1	Prmt1	-0.62454	0.0262243	-0.511841	0.0959228
Conserved oligomeric Golgi complex subunit 1	Cog1	-0.205264	0.10961	-0.515292	0.0307135
Peroxisomal targeting signal 1 receptor	Pex5	-1.20879	0.0444755	-0.516367	0.141884
Immunoglobulin-binding protein 1	Igbp1	-0.335976	0.0395607	-0.521392	0.00537428
Sentrin-specific protease 3	Senp3	0.482075	0.0050905	-0.523972	0.0060895
Eukaryotic translation initiation factor 6	Eif6	-0.440936	0.382594	-0.52633	0.00456053
Vesicle transport protein USE1	Use1	-0.44377	0.0954933	-0.52891	0.00298538
Serine/threonine-protein phosphatase 6 regulatory ankyrin repeat subunit A	Ankrd28	-0.762881	0.00535653	-0.535395	0.0182718
Myosin regulatory light chain 12B;Myosin regulatory light polypeptide 9	Myl12b;Myl9	-0.417343	0.0129387	-0.538097	0.0505115
Sorting nexin-9	Snx9	-0.541311	0.00455749	-0.538368	0.0024377
Eukaryotic translation initiation factor 3 subunit C	Eif3c	-0.498828	0.00574652	-0.541453	0.00170219
Septin-7	Sept7	-0.158521	0.168009	-0.541476	0.00583932
Ras GTPase-activating protein 3	Rasa3	-0.265331	0.153278	-0.54913	0.0203283
Mediator of RNA polymerase II transcription subunit 19	Med19	-0.238127	0.221547	-0.551233	0.0969155
Glucose-6-phosphate 1-dehydrogenase X;Glucose-6-phosphate 1-dehydrogenase	G6pdx	-1.02941	0.000219187	-0.551621	0.0155422
Guanine nucleotide-binding protein-like 3-like protein	Gnl3l	-0.687733	0.0318986	-0.557347	0.00161455
Synaptojanin-2	Synj2	0.199819	0.0404407	-0.557377	0.0329202
Coronin-1C	Coro1c	-0.953839	0.00031	-0.559909	0.00388003
Heat shock 70 kDa protein 4	Hspa4	-0.83181	0.00420291	-0.560986	0.014397
Replication factor C subunit 1	Rfc1	-0.732182	0.00236912	-0.562746	0.00362334
Protein HIRA	Hira	-0.31541	0.249825	-0.569058	0.005169
Guanine nucleotide exchange factor for Rab-3A	Rab3il1	-0.365135	0.031165	-0.570951	0.0034843
Phospholipase D4	Pld4	0.0770904	0.923438	-0.571261	0.520679
Syntaxin-binding protein 5	Stxbp5	-0.422173	0.172937	-0.571279	0.0844785
Peroxisome assembly factor 2	Pex6	-0.123393	0.182	-0.572865	0.0559295
F-actin-capping protein subunit alpha-1	Capza1	-0.701403	0.01835	-0.573806	0.0140115
Amyloid beta A4 precursor protein-binding family B member 1-interacting protein	Apbb1ip	-0.750835	0.00524679	-0.575356	0.0151435
Myomegalin	Pde4dip	-0.389256	0.0292265	-0.585925	0.00444504
Heterogeneous nuclear ribonucleoprotein F;Heterogeneous nuclear ribonucleoprotein F, N-terminally processed	Hnrnpf	-0.72443	0.000705917	-0.58732	0.00209491
Uncharacterized protein FLJ45252 homolog		-0.490422	0.00679601	-0.592567	0.00124612
Peptidyl-prolyl cis-trans isomerase D	Ppid	-0.447207	0.0372153	-0.593076	0.0424597
Filamin-A	Flna	-0.541334	0.00309723	-0.593783	0.00475216
ER membrane protein complex subunit 3	Emc3	-0.437314	0.40562	-0.595243	0.476676
Phosphatidylinositol 3,4,5-trisphosphate 5-phosphatase 1	Inpp5d	-0.279862	0.0203517	-0.596732	0.00496288
Tripartite motif-containing protein 35	Trim35	-1.79431	0.0208414	-0.59801	0.0249416
Trafficking protein particle complex subunit 9	Trappc9	0.91441	0.206544	-0.598329	0.277085
Microtubule-actin cross-linking factor 1	Macf1	-0.202309	0.0768044	-0.598463	0.00128172
Survival motor neuron protein	Smn1	-0.569667	0.00417546	-0.601003	0.0114031
Phostensin	Ppp1r18	-0.832929	0.00179803	-0.605358	0.00190543
	Gm16286	-1.00627	0.0142148	-0.605458	0.411364
Poly(A) polymerase alpha;Poly(A) polymerase beta	Papola;Papolb	-1.15558	0.000537516	-0.608605	0.00988736
Ubiquitin carboxyl-terminal hydrolase 15	Usp15	-0.715011	0.014107	-0.609459	0.00661712
Transcription factor Dp-1	Tfdp1	0.0436909	0.964108	-0.610984	0.0121882
DNA-directed RNA polymerase II subunit RPB3	Polr2c	-0.886427	0.0599534	-0.611441	0.0833132
SWI/SNF-related matrix-associated actin-dependent regulator of chromatin subfamily D member 2	Smarcd2	-0.765724	0.00461219	-0.616201	0.00341538
FACT complex subunit SPT16	Supt16;Supt16h	-1.54863	0.000705917	-0.619009	0.00755919
UHRF1-binding protein 1-like	Uhrf1bp1l	-0.376514	0.107609	-0.626076	0.0201193
Proteasome subunit alpha type-2	Psma2	-0.514408	0.2118	-0.626702	0.0103469
Smith-Magenis syndrome chromosomal region candidate gene 8 protein homolog	Smcr8	-0.654552	0.00366633	-0.630894	0.0171862
E3 ubiquitin-protein ligase RAD18	Rad18	-2.29457	0.296144	-0.631009	0.0142793
Putative adenosylhomocysteinase 2;Adenosylhomocysteinase;Putative adenosylhomocysteinase 3	Ahcyl1;Ahcyl2	-0.40812	0.018209	-0.631236	0.00259334
FACT complex subunit SSRP1	Ssrp1	-0.592748	0.00771507	-0.634661	0.00434877
Ubiquitin carboxyl-terminal hydrolase;Ubiquitin carboxyl-terminal hydrolase 5	Usp5	-1.38113	0.113974	-0.634703	0.0916826
Cyclin-dependent kinase 11B	Cdk11b	-1.49731	0.000248076	-0.634987	0.0455451
Pyridoxal-dependent decarboxylase domain-containing protein 1	Pdxdc1	-1.19865	0.0695361	-0.63851	0.31239
Kinectin	Ktn1	-0.793239	0.000281231	-0.642253	0.00155412
Transforming acidic coiled-coil-containing protein 3	Tacc3	-0.199589	0.346435	-0.643534	0.0599799
E3 ubiquitin-protein ligase CBL	Cbl	0.200904	0.589473	-0.643622	0.249856
Phosphatidylinositol 4,5-bisphosphate 3-kinase catalytic subunit gamma isoform	Pik3cg	0.981934	0.165979	-0.648461	0.410305
Perilipin-2	Plin2	-0.327104	0.0232826	-0.654261	0.00529296
Dedicator of cytokinesis protein 7	Dock7	-0.70108	0.00102105	-0.657185	0.00104515
Pre-mRNA-splicing factor 18	Prpf18	-0.681134	0.195953	-0.65801	0.0589341
		-0.543737	0.00177743	-0.660154	0.00095498
RNA-binding protein Raly	Raly	-1.00674	0.0389567	-0.660163	0.0249995
DNA polymerase alpha subunit B	Pola2	-2.65405	1.4889e-05	-0.663818	0.00441862
Transcription factor HIVEP3	Hivep3	-1.89825	0.0060473	-0.668029	0.0275052
WD repeat-containing protein 41	Wdr41	-0.487506	0.0218395	-0.671053	0.0118924
Embryonic stem cell-specific 5-hydroxymethylcytosine-binding protein	Hmces	-0.768415	0.0949694	-0.673998	0.10366
Tight junction protein ZO-2	Tjp2	-0.546589	0.0678091	-0.68178	0.03413
Conserved oligomeric Golgi complex subunit 7	Cog7	0.558629	0.317949	-0.682615	0.0631175
Dedicator of cytokinesis protein 1	Dock1	-0.782393	0.355405	-0.685462	0.293934
Protein NDRG2	Ndrg2	-1.39968	6.09063e-05	-0.685649	0.00139016
Myosin-9	Myh9	-0.501392	0.00216637	-0.694223	0.00110583
Paxillin	Pxn	-0.539149	0.0147764	-0.694468	0.00204304
E3 SUMO-protein ligase RanBP2	Ranbp2	-0.777842	0.000281798	-0.695855	0.00110952
Gasdermin-D	Gsdmdc1	-0.675786	0.00140571	-0.697723	0.00189137
Heterogeneous nuclear ribonucleoprotein K	Hnrnpk	-1.28415	4.26838e-05	-0.698641	0.00256651
Unconventional myosin-VIIa	Myo7a	0.560341	0.344275	-0.701011	0.00340484
	Akap13	-0.181138	0.156854	-0.701425	0.00124625
Elongator complex protein 4	Elp4	0.184037	0.248	-0.701431	0.474378
Tumor necrosis factor;Tumor necrosis factor, membrane form;Intracellular domain 1;Intracellular domain 2;C-domain 1;C-domain 2;Tumor necrosis factor, soluble form	Tnf	0.495148	0.145597	-0.702424	0.34754
	Gbf1	-0.514997	0.0597469	-0.703118	0.00606742
Glucocorticoid receptor	Nr3c1	-0.333395	0.0176234	-0.703998	0.0251453
	Ahnak	0.0577667	0.690061	-0.705748	0.00162073
Transmembrane protein 97	Tmem97	-0.60929	0.36896	-0.706022	0.653705
Inhibitor of Bruton tyrosine kinase	Ibtk	-0.893368	0.537162	-0.707105	0.00277905
HAUS augmin-like complex subunit 5	Haus5	0.755395	0.503021	-0.708431	0.672343
	Sipa1	-0.62032	0.00121442	-0.718323	0.00137041
Serine/threonine-protein phosphatase 4 catalytic subunit	Ppp4c	-1.90659	2.949e-05	-0.718349	0.00606093
KN motif and ankyrin repeat domain-containing protein 2	Kank2	-0.765254	0.00103703	-0.720791	0.00163722
CDKN2A-interacting protein	Cdkn2aip	-1.79445	0.0012021	-0.725268	0.00337553
Small nuclear ribonucleoprotein Sm D1	Snrpd1	-0.684059	0.00847173	-0.733678	0.00754998
SUMO-conjugating enzyme UBC9	Ube2i	-0.517401	0.0108773	-0.739563	0.0018863
Centromere/kinetochore protein zw10 homolog	Zw10	-0.683582	0.00249392	-0.740983	0.00112764
EF-hand domain-containing protein D2	Efhd2	-0.401416	0.0321338	-0.743315	0.00324879
Tuftelin-interacting protein 11	Tfip11	-1.0982	0.000100516	-0.74335	0.00111512
Nucleosome assembly protein 1-like 1	Nap1l1	-1.35672	4.05674e-05	-0.743575	0.00137675
Deleted in autism protein 1 homolog		-2.14706	0.000366659	-0.748746	0.378118
	Akap9	-0.637962	0.00696011	-0.750154	0.000891677
Bridging integrator 2	Bin2	-0.843047	0.000462906	-0.750892	0.000804941
Myosin light polypeptide 6	Myl6	-0.578641	0.00186264	-0.751533	0.00179788
CLIP-associating protein 2	Clasp2	-0.46497	0.00463831	-0.753882	0.00824485
Protein FAM114A2	Fam114a2	-0.747499	0.00745391	-0.757848	0.00307492
Ribosome-binding protein 1	Rrbp1	-0.834022	0.0145143	-0.76094	0.000885321
cAMP-dependent protein kinase type II-alpha regulatory subunit	Prkar2a	-0.523992	0.0112924	-0.763389	0.00140148
Barrier-to-autointegration factor;Barrier-to-autointegration factor, N-terminally processed	Banf1	-0.114279	0.599277	-0.765983	0.277166
Lamin-B receptor	Lbr	-1.24748	4.53711e-05	-0.767653	0.00264231
CD2-associated protein	Cd2ap	-0.260629	0.0625258	-0.769318	0.00626689
Acyl-protein thioesterase 2	Lypla2	-0.59696	0.00498549	-0.771136	0.00117296
SUN domain-containing protein 1	Sun1	-0.595629	0.0725939	-0.77186	0.000964716
PC4 and SFRS1-interacting protein	Psip1	-0.516326	0.532697	-0.772409	0.0691546
Lactoylglutathione lyase	Glo1	-1.05926	0.00968186	-0.773022	0.00476676
	Ift140	0.768005	0.164736	-0.779955	0.386681
DNA ligase;DNA ligase 3	Lig3	-1.01586	0.00126648	-0.783536	0.00083813
DNA polymerase delta subunit 3	Pold3	-1.24962	0.00314341	-0.785807	0.00294302
Serine/threonine-protein kinase PAK 2;PAK-2p27;PAK-2p34	Pak2	-0.249609	0.0211133	-0.786491	0.00303545
FYN-binding protein	Fyb	-0.197008	0.238434	-0.788582	0.000903553
Clathrin interactor 1	Clint1	-0.785204	0.000676475	-0.788961	0.0197958
28 kDa heat- and acid-stable phosphoprotein	Pdap1	-0.135359	0.296144	-0.789057	0.000693868
CWF19-like protein 2	Cwf19l2	-1.78437	2.29034e-05	-0.793258	0.000896434
Hematopoietic lineage cell-specific protein	Hcls1	-0.426586	0.00355564	-0.794352	0.00272826
Protein S100-A10	S100a10	-0.278433	0.700806	-0.800842	0.319287
Sec1 family domain-containing protein 2	Scfd2	-0.727843	0.0338853	-0.806385	0.0755529
Elongation factor 1-beta	Eef1b2;Eef1b	-0.627407	0.0393237	-0.806611	0.0220714
Centrosomal protein of 170 kDa	Cep170	-0.600899	0.00128797	-0.809307	0.00155412
Mitochondrial import inner membrane translocase subunit Tim17-A	Timm17a	1.42542	0.0404407	-0.817633	0.414183
Cyclic AMP-dependent transcription factor ATF-6 alpha;Processed cyclic AMP-dependent transcription factor ATF-6 alpha	Atf6	-1.20663	0.000478368	-0.820125	0.00596668
Kelch-like protein 9	Klhl9	0.0834985	0.914587	-0.820426	0.374341
Protein SDE2 homolog	Sde2	-2.39164	0.0007484	-0.821696	0.318104
Ribosomal protein;60S ribosomal protein L10a	Rpl10a	-0.944659	0.00757359	-0.82577	0.0139663
F-box/WD repeat-containing protein 11;F-box/WD repeat-containing protein 1A	Fbxw11;Btrc	-0.411885	0.0384254	-0.829524	0.102317
	Dnajc13	-0.35528	0.0145886	-0.830988	0.000391684
Replication protein A 14 kDa subunit	Rpa3	-1.07915	0.000795332	-0.834363	0.00132246
Nuclear migration protein nudC	Nudc	-0.738401	0.000668456	-0.845322	0.000360944
Splicing factor, proline- and glutamine-rich	Sfpq	-1.42646	0.000213113	-0.853686	0.00232758
Tumor protein D54	Tpd52l2	-0.947482	0.00293502	-0.858537	0.00598113
Golgin subfamily A member 4	Golga4	-0.0937221	0.5331	-0.861376	0.000350197
Protein CDV3	Cdv3	-0.362269	0.0135631	-0.863134	0.0100063
Arf-GAP domain and FG repeat-containing protein 1	Agfg1	-0.63816	0.00124478	-0.864686	0.00456053
Exosome complex component RRP43	Exosc8	-0.0599168	0.526882	-0.868283	0.000574772
Splicing factor 3A subunit 2	Sf3a2	-1.06058	0.0318204	-0.87032	0.0315158
Diacylglycerol kinase;Diacylglycerol kinase zeta	Dgkz	-0.886067	0.000941738	-0.872879	0.000544013
Drebrin-like protein	Dbnl	-0.551774	0.00745391	-0.872906	0.0110981
AMP deaminase 2	Ampd2	-0.465968	0.00535653	-0.87557	0.000495157
WD repeat domain phosphoinositide-interacting protein 2	Wipi2	-0.269029	0.0349086	-0.876383	0.00808576
WD repeat-containing protein 26	Wdr26	-0.76001	0.0182917	-0.876707	0.00261645
Ran GTPase-activating protein 1	Rangap1	-0.719496	0.000846252	-0.882269	0.000530267
	Golga3	0.148413	0.448288	-0.883215	0.00187958
Ribosome biogenesis protein BOP1	Bop1	-0.0549693	0.773847	-0.883469	0.00303757
Elongation factor 1-delta	Eef1d	-0.885742	0.00148368	-0.897936	0.000410878
Histone deacetylase 1	Hdac1	-1.60729	8.10499e-05	-0.898806	0.000712368
Autophagy-related protein 2 homolog B	Atg2b	-0.749317	0.0766171	-0.903199	0.00274565
Probable ATP-dependent RNA helicase DDX52	Ddx52	-0.383188	0.0269636	-0.904919	0.138023
Trimethylguanosine synthase	Tgs1	-1.26422	0.000107184	-0.907861	0.000504226
Eukaryotic peptide chain release factor GTP-binding subunit ERF3A	Gspt1	-0.28639	0.0359746	-0.908398	0.00112764
DNA mismatch repair protein Msh6	Msh6	-1.32954	0.000157094	-0.911115	0.000258485
Nucleolar GTP-binding protein 2	Gnl2	-1.10272	0.000292281	-0.912577	0.00261645
Scaffold attachment factor B1	Safb	-1.88537	8.47844e-05	-0.913136	0.0199843
Afadin	Mllt4	-0.895198	0.000433285	-0.913325	0.0191592
F-actin-capping protein subunit beta	Capzb	-0.91733	0.00788206	-0.917525	0.000366505
Pre-mRNA-processing factor 6	Prpf6	-1.94407	2.87699e-05	-0.917723	0.000598144
Leucine-rich repeat and WD repeat-containing protein 1	LRWD1;Lrwd1	-1.14464	0.32718	-0.928907	0.274276
Serine/threonine-protein kinase tousled-like 2	Tlk2	-2.9959	0.00542661	-0.929265	0.381625
E3 ubiquitin-protein ligase TRIP12	Trip12	-1.13317	0.000166471	-0.931301	0.000383059
Small nuclear ribonucleoprotein E	Snrpe	-1.43597	0.0884137	-0.934677	0.0846492
Peptidyl-prolyl cis-trans isomerase-like 2	Ppil2	-0.854825	0.00362843	-0.935258	0.000902003
Small kinetochore-associated protein	Knstrn	-0.657434	0.0538605	-0.937104	0.0292649
Serine--tRNA ligase, cytoplasmic	Sars	-1.01445	0.000100543	-0.937477	0.000771784
Titin	Ttn	-0.771614	0.717695	-0.937806	0.678532
Protein PRRC1	Prrc1	-0.861306	0.315742	-0.9389	0.069871
Shootin-1	Kiaa1598	-0.295259	0.0799529	-0.943661	0.00163737
Matrin-3	Matr3	-0.315237	0.0898853	-0.946587	0.00313292
RNA-binding protein 7	Rbm7	-1.17389	0.00414944	-0.948885	0.00562161
Retinoic acid early-inducible protein 1-alpha;Retinoic acid early-inducible protein 1-beta	Raet1a;Raet1b	-1.15306	0.351795	-0.950975	0.140545
	Numa1	-1.04342	0.000557668	-0.956492	0.000677501
C-Jun-amino-terminal kinase-interacting protein 4	Spag9	-0.542603	0.00341297	-0.97881	0.000355645
Translocon-associated protein subunit gamma	Ssr3	0.202428	0.232319	-0.979213	0.638602
rRNA-processing protein FCF1 homolog	Fcf1	2.29127	0.00299148	-0.980102	0.460904
cAMP-dependent protein kinase type II-beta regulatory subunit	Prkar2b	-0.625668	0.0050069	-0.984741	0.0232107
Splicing factor 3B subunit 5	Sf3b5	-1.37675	0.000744101	-0.986854	0.0151599
Zinc finger protein 2;Zinc finger protein 182	Gm14412;Zfp931;Gm14410;Gm4631;Gm14305;Gm14434;Gm14419;Gm2381;AI987944;Gm14406;Gm14444;Gm6871;Zfp933;AW146154;Zfp248;Gm10324;Zfp182;9830147E19Rik;Zfp180;5430403G16Rik;Zfp788;Zfp2;Znf182	-0.592124	0.0151325	-0.99661	0.000503138
60S ribosomal protein L12	Rpl12	-1.37929	0.00023891	-0.997283	0.00246028
Death-associated protein 1	Dap	-1.68173	0.0189078	-1.00225	0.00460649
E3 ubiquitin-protein ligase RNF135	Rnf135	-0.895023	0.000629403	-1.00969	0.00172825
Histone deacetylase 6	Hdac6	-0.460593	0.0079172	-1.01336	0.00123129
StAR-related lipid transfer protein 9	Stard9	-2.98052	0.000377822	-1.01378	0.0527548
Ribonucleoprotein PTB-binding 1	Raver1	-0.942476	0.000549329	-1.01561	0.00986079
Poly(ADP-ribose) glycohydrolase	Parg	-1.05787	0.00216637	-1.01653	0.000934991
Protein KTI12 homolog	Kti12	1.54885	0.0941481	-1.02033	0.376998
Trafficking protein particle complex subunit 5	Trappc5	-0.0634261	0.772598	-1.0207	0.293934
Metastasis-associated protein MTA1	Mta1	-2.67147	0.0176234	-1.02424	0.0679815
SLIT-ROBO Rho GTPase-activating protein 2	Srgap2	0.117571	0.878586	-1.02426	0.0390203
Glutamine-rich protein 1	Qrich1	-1.77247	0.00090341	-1.02731	0.000192465
Hematological and neurological expressed 1-like protein	Hn1l	-0.636219	0.00193703	-1.03512	0.000467065
SWI/SNF-related matrix-associated actin-dependent regulator of chromatin subfamily B member 1	Smarcb1	-3.27806	9.069e-05	-1.03609	0.000383059
Small ubiquitin-related modifier 1	Sumo1	-0.836552	0.00039971	-1.03684	0.00018832
Mediator of RNA polymerase II transcription subunit 1	Med1	-2.55566	0.00343846	-1.03699	0.0227122
Serine/arginine-rich splicing factor 6	Srsf6	-2.44551	0.000145665	-1.038	0.0409419
Plasminogen activator inhibitor 1 RNA-binding protein	Serbp1	-1.1209	0.000346327	-1.04332	0.00186121
Coronin-7	Coro7	-1.12829	0.000122789	-1.04395	0.000676867
Transgelin-2	Tagln2	-0.918514	0.000346327	-1.05178	0.0028674
Metastasis-associated protein MTA2	Mta2	-2.55898	1.56743e-05	-1.05801	0.000648316
Caspase-3;Caspase-3 subunit p17;Caspase-3 subunit p12	Casp3	-0.807607	0.00155972	-1.0586	0.312072
Elongator complex protein 2	Elp2	0.152396	0.891723	-1.06166	0.369848
Eukaryotic translation initiation factor 4B	Eif4b	-0.788148	0.00102105	-1.06362	0.00187958
Macrophage erythroblast attacher	Maea	-0.32852	0.0737679	-1.0704	0.0167894
Vesicle-trafficking protein SEC22b	Sec22b	-1.34278	0.00173214	-1.07384	0.00204359
Nesprin-3	Syne3	-1.97423	0.00136353	-1.07384	0.302209
Replication protein A 70 kDa DNA-binding subunit;Replication protein A 70 kDa DNA-binding subunit, N-terminally processed	Rpa1	-1.36758	0.00141236	-1.07554	0.000748155
Pre-mRNA-splicing factor ATP-dependent RNA helicase DHX15	Dhx15	-2.35703	1.11554e-05	-1.07632	0.00021513
Toll/interleukin-1 receptor domain-containing adapter protein	Tirap	-0.161716	0.196332	-1.08382	0.0199468
Peroxisomal membrane protein PEX14	Pex14	-1.41568	0.000180143	-1.08475	0.00307492
	Kidins220	-1.42568	0.000352565	-1.09023	0.000693355
RNA polymerase II-associated protein 3	Rpap3	-1.32679	0.00132215	-1.09226	0.00163205
Interleukin enhancer-binding factor 3	Ilf3	-1.19673	9.78796e-05	-1.09294	0.00323179
Alpha-centractin	Actr1a	-1.07904	0.000416757	-1.09319	0.000482206
Coiled-coil domain-containing protein 174	Ccdc174	-1.0057	0.00998849	-1.1027	0.00513896
Nuclear cap-binding protein subunit 1	Ncbp1	-1.36456	0.00612181	-1.10513	0.0142479
DNA polymerase alpha catalytic subunit	Pola1	-1.80937	0.00012806	-1.10852	0.000109665
Tyrosyl-DNA phosphodiesterase 2	Tdp2	-1.45179	3.02069e-05	-1.10879	9.26151e-05
Copine-2	Cpne2	-0.614889	0.382079	-1.11369	0.0664267
Coiled-coil domain-containing protein 12	Ccdc12	-4.31012	0.000117637	-1.11481	0.454739
Mitotic spindle assembly checkpoint protein MAD1	Mad1l1	-0.211131	0.625466	-1.11487	0.00109709
Ras association domain-containing protein 5	Rassf5	-0.443114	0.0167043	-1.11518	0.000880985
Superkiller viralicidic activity 2-like 2	Skiv2l2	-1.14512	0.000236577	-1.11693	0.00345773
Protein scribble homolog	Scrib	-1.0053	0.00110393	-1.12456	0.000863312
Ran-binding protein 3	Ranbp3	-1.71131	4.96056e-05	-1.12561	0.00247838
Liprin-beta-1	Ppfibp1	-1.24232	0.00055443	-1.13403	0.000285849
Catechol O-methyltransferase	Comt	-1.14575	0.0150224	-1.13517	0.00191333
Interleukin enhancer-binding factor 2	Ilf2	-1.08944	0.00538652	-1.13915	0.00407066
	Nbas	-1.11216	0.000432213	-1.14099	0.000361583
Hypoxia-inducible factor 1-alpha	Hif1a	-1.67144	0.104031	-1.14115	0.00070348
Dual specificity protein phosphatase 4	Dusp4	0.582182	0.627062	-1.14576	0.331187
Serine/threonine-protein phosphatase PP1-gamma catalytic subunit	Ppp1cc	-1.57356	0.000113933	-1.14762	0.000392039
REST corepressor 1	Rcor1;Rcor3	-0.607309	0.072135	-1.14833	0.0405417
SWI/SNF-related matrix-associated actin-dependent regulator of chromatin subfamily D member 1	Smarcd1	-1.65127	0.00544155	-1.15096	0.00231443
AMSH-like protease	Stambpl1	-0.919995	0.000130554	-1.1525	0.000121493
Epidermal growth factor receptor substrate 15	Eps15	-1.60987	8.96704e-05	-1.15281	0.00538244
WD repeat domain phosphoinositide-interacting protein 4	Wdr45	-1.21041	0.276705	-1.16172	0.306002
Splicing factor 3B subunit 6	Sf3b6	-1.79103	0.000130554	-1.17256	0.000298347
WASH complex subunit FAM21	Fam21	-1.46528	4.8841e-05	-1.17379	0.000308135
Synergin gamma	Synrg	-0.784642	0.000457526	-1.17747	0.000230564
Spermatogenesis-associated serine-rich protein 2	Spats2	-0.763134	0.00182415	-1.17838	0.000791983
60S acidic ribosomal protein P2	Rplp2	-1.02625	0.000690014	-1.18228	0.00200772
General transcription factor 3C polypeptide 1	Gtf3c1	-0.867845	0.0211133	-1.192	0.00963503
B-cell differentiation antigen CD72	Cd72	-1.70116	0.0364221	-1.1937	0.000298347
Echinoderm microtubule-associated protein-like 4	Eml4	-1.2388	0.000951715	-1.19399	9.46234e-05
Oligoribonuclease, mitochondrial	Rexo2	-1.18169	0.134749	-1.19719	0.124728
Cyclic AMP-dependent transcription factor ATF-6 beta;Processed cyclic AMP-dependent transcription factor ATF-6 beta	Atf6b	-1.01712	0.0010377	-1.201	0.000257899
Zinc finger CCCH domain-containing protein 18	Zc3h18	-2.09708	0.000977553	-1.20238	0.0106944
Double-strand break repair protein MRE11A	Mre11a	-1.2992	0.00037275	-1.20838	0.000115789
	AI607873	-2.63605	7.71541e-05	-1.21439	0.0181463
Aftiphilin	Aftph	-0.714543	0.000470368	-1.21536	0.000255286
Polymerase delta-interacting protein 3	Poldip3	-1.38162	0.0211133	-1.22994	0.0126802
DNA repair protein RAD51 homolog 1	Rad51	-0.250045	0.784081	-1.23065	0.284965
Formin-1	Fmn1	-0.0263483	0.861298	-1.2354	0.132225
U3 small nucleolar ribonucleoprotein protein IMP3	Imp3	0.626949	0.162325	-1.2356	0.0211961
General transcription factor IIF subunit 2	Gtf2f2	-1.84359	0.00121819	-1.24732	0.00362334
PAX-interacting protein 1	Paxip1	-1.40038	0.0110155	-1.24806	0.00889709
WD repeat-containing protein 7	Wdr7	-0.429071	0.387183	-1.25564	0.270082
YEATS domain-containing protein 2	Yeats2	-1.33891	0.0586374	-1.25621	0.125225
Hematological and neurological expressed 1 protein;Hematological and neurological expressed 1 protein, N-terminally processed	Hn1	-0.824326	0.0020438	-1.26624	0.00653427
Ubiquitin carboxyl-terminal hydrolase;Ubiquitin carboxyl-terminal hydrolase 14	Usp14	-0.0854526	0.431234	-1.26976	0.257624
	Macf1	0.773565	0.468051	-1.27542	0.0350406
Structural maintenance of chromosomes flexible hinge domain-containing protein 1	Smchd1	-2.01079	8.08227e-05	-1.27594	0.000196972
	Taf15	-1.74256	0.00128491	-1.27823	0.000880985
Protein Niban	Fam129a	-1.46239	0.000661553	-1.29516	0.00897145
Small nuclear ribonucleoprotein F	Snrpf	-1.636	0.00221236	-1.30056	0.0011635
Nuclear factor erythroid 2-related factor 2	Nfe2l2	-0.802544	0.223548	-1.31327	0.00032947
Nitric oxide synthase-interacting protein	Nosip	-3.64741	0.00222342	-1.31331	0.00441862
ADP-ribosylation factor GTPase-activating protein 1	Arfgap1	-0.462102	0.00988167	-1.32319	0.000759729
Stromal interaction molecule 1	Stim1	-0.980967	0.0001761	-1.32559	0.000188967
Beta-centractin	Actr1b	-1.81735	0.0161842	-1.32645	0.00803745
Crooked neck-like protein 1	Crnkl1	-2.09885	8.13154e-05	-1.3275	0.000452933
Ubiquitin carboxyl-terminal hydrolase;Ubiquitin carboxyl-terminal hydrolase 34	Usp34	-0.86465	0.0320622	-1.33001	0.0804338
Phosphatase and actin regulator 4	Phactr4	-0.813114	0.0254008	-1.33269	0.0552402
Stathmin	Stmn1	-1.20082	0.000772722	-1.33296	0.00243382
DNA-directed RNA polymerase III subunit RPC9	Crcp	-0.586404	0.00894154	-1.33367	0.000279415
Little elongation complex subunit 1	Ice1	-2.16463	0.00863912	-1.34078	0.0359413
Tumor protein D52	Tpd52	-0.762372	0.0579524	-1.34224	0.000333453
Importin subunit alpha-4	Kpna3	-1.28826	0.000272344	-1.36079	0.000126954
Microtubule-associated protein 4;Microtubule-associated protein	Map4	-1.26645	5.9355e-05	-1.36201	0.000101436
Vacuolar protein sorting-associated protein 26B	Vps26b	-0.0574897	0.953503	-1.36306	0.143348
E3 ubiquitin-protein ligase UBR1	Ubr1	-2.33908	0.138896	-1.36532	0.288622
DNA-binding protein Ikaros	Ikzf1	-1.77906	0.000141336	-1.36683	0.000308736
Zinc finger protein 14;Zinc finger protein 82	Zfp14;Zfp82	-0.980976	0.496344	-1.36982	0.041449
Complement component 1 Q subcomponent-binding protein, mitochondrial	C1qbp	-1.73091	6.09063e-05	-1.37643	0.000377045
U2 snRNP-associated SURP motif-containing protein	U2surp	-3.30646	7.36973e-06	-1.3816	0.00347535
Stromal interaction molecule 2	Stim2	-1.16989	0.0211133	-1.3878	0.00186752
Probable ATP-dependent RNA helicase DDX46	Ddx46	-2.57379	7.36973e-06	-1.3978	0.00129923
Reticulon-4	Rtn4	-1.21888	7.11538e-05	-1.40043	0.000194221
RNA-binding protein 10	Rbm10	-2.05209	0.00693189	-1.40881	0.011599
	Baz2b	-1.69593	0.0109652	-1.41681	0.000633037
Protein prune homolog	Prune	-1.16001	0.000285346	-1.4208	8.06804e-05
Cyclin-T1	Ccnt1	-1.68828	5.55732e-05	-1.42216	0.00190957
Transcriptional repressor protein YY1	Yy1	-1.53588	0.000685041	-1.42265	0.000233713
Mediator of RNA polymerase II transcription subunit 15	Med15	-1.12021	0.0010792	-1.42428	0.00021513
Serine/arginine repetitive matrix protein 1	Srrm1	-2.53799	2.29205e-05	-1.44109	0.00843993
Histone-binding protein RBBP7	Rbbp7	-2.68326	8.13154e-05	-1.46175	0.00280063
Protein SON	Son	-1.86144	4.53102e-05	-1.46638	0.000676867
Box C/D snoRNA protein 1	Znhit6	-0.903945	0.000759553	-1.47034	0.000112553
Origin recognition complex subunit 3	Orc3	-2.168	3.31029e-05	-1.47407	6.83911e-05
	Trip11	-1.41786	0.000100516	-1.4743	0.000111358
SLAIN motif-containing protein 2	Slain2	-1.6539	0.150521	-1.47547	0.129943
Lamina-associated polypeptide 2, isoforms alpha/zeta	Tmpo	-2.80973	0.00731897	-1.48067	0.000361721
DNA mismatch repair protein Mlh1	Mlh1	-1.7413	2.35964e-05	-1.4894	5.03369e-05
CDK2-associated and cullin domain-containing protein 1	Cacul1	-3.99657	0.00274234	-1.49435	0.0844258
Double-strand-break repair protein rad21 homolog	Rad21	-0.163747	0.72537	-1.49777	0.00793535
	Cabin1	-1.07294	0.175686	-1.50328	0.00113025
tRNA (adenine(58)-N(1))-methyltransferase non-catalytic subunit TRM6	Trmt6	-1.78276	0.0736866	-1.52191	0.0684712
Zinc finger MYM-type protein 4	Zmym4	-2.21377	2.80062e-05	-1.52986	0.00168719
Histone lysine demethylase PHF8	Phf8	-1.67548	0.000281798	-1.53695	9.46234e-05
Wings apart-like protein homolog	Wapal	-1.85095	3.76924e-05	-1.53708	0.00018832
Transcription activator BRG1	Smarca4	-2.10122	2.949e-05	-1.54144	4.69454e-05
Actin-like protein 6A	Actl6a	-2.03739	0.000111114	-1.54702	6.86638e-05
Dual adapter for phosphotyrosine and 3-phosphotyrosine and 3-phosphoinositide	Dapp1	0.261724	0.343459	-1.54838	0.0187186
Chromodomain-helicase-DNA-binding protein 4	Chd4	-3.03143	6.31451e-06	-1.54916	7.84629e-05
Splicing factor 3B subunit 1	Sf3b1	-2.02132	1.12843e-05	-1.55751	4.51707e-05
DNA-directed RNA polymerase III subunit RPC6	Polr3f	-2.61016	0.000925015	-1.55912	0.0172753
E3 ubiquitin-protein ligase RING2	Rnf2	-1.73928	0.000869839	-1.56219	0.000436945
Rho GDP-dissociation inhibitor 2	Arhgdib	-0.444415	0.0371512	-1.56329	0.0424597
Breast carcinoma-amplified sequence 3 homolog	Bcas3	1.64315	0.125696	-1.56586	0.261929
	Nolc1	-1.86651	0.000432213	-1.5662	0.00143346
Muskelin	Mkln1	-0.774794	0.0145143	-1.56625	0.000261394
Protein LYRIC	Mtdh	-1.77732	5.9355e-05	-1.56771	0.000664965
Armadillo repeat-containing protein 8	Armc8	-2.07365	0.197545	-1.57558	0.160058
Heterogeneous nuclear ribonucleoprotein A1;Heterogeneous nuclear ribonucleoprotein A1, N-terminally processed	Hnrnpa1	-1.85986	1.50511e-05	-1.5767	0.000899909
Splicing factor 1	Sf1	-1.88877	1.15587e-05	-1.57996	0.000188029
Cleavage and polyadenylation specificity factor subunit 4	Cpsf4	-3.14561	0.00094652	-1.58212	9.67288e-05
Thioredoxin	Txn	-1.1722	0.000617778	-1.59033	0.000228317
Bifunctional UDP-N-acetylglucosamine 2-epimerase/N-acetylmannosamine kinase;UDP-N-acetylglucosamine 2-epimerase (hydrolyzing);N-acetylmannosamine kinase	Gne	-1.30709	0.000102428	-1.59205	7.58126e-05
Emerin	Emd	-2.16198	0.000465918	-1.60732	3.86032e-05
SWI/SNF-related matrix-associated actin-dependent regulator of chromatin subfamily A member 5	Smarca5	-1.87518	3.63427e-05	-1.63921	9.16725e-05
Retinoblastoma-binding protein 5	Rbbp5	-3.93068	8.06152e-06	-1.64733	0.00386554
Pleiotropic regulator 1	Plrg1	-3.02193	0.00241654	-1.64743	0.00803745
Lysine-specific histone demethylase 1A	Kdm1a	-2.50085	0.0130038	-1.64863	0.00425655
Casein kinase II subunit alpha	Csnk2a1	-1.51449	0.00641435	-1.64863	3.49402e-05
La-related protein 7	Larp7;Gm12666	-2.33796	0.000338293	-1.65241	0.0242808
Ubiquitin carboxyl-terminal hydrolase;Ubiquitin carboxyl-terminal hydrolase 7	Usp7	-2.11716	7.36973e-06	-1.654	4.69454e-05
RNA-binding protein with serine-rich domain 1	Rnps1	-2.52718	4.00328e-05	-1.66127	0.0102128
Transcription initiation factor TFIID subunit 12	Taf12	-2.11947	0.00618264	-1.66516	0.000451543
Histone deacetylase;Histone deacetylase 3	Hdac3	-3.08156	0.000211813	-1.67964	0.046526
Cleavage and polyadenylation specificity factor subunit 2	Cpsf2	-1.9983	0.000266619	-1.67976	0.00018832
ATPase family AAA domain-containing protein 2	Atad2	-2.48548	0.00100701	-1.68764	0.00140148
Histone deacetylase complex subunit SAP18	Gm10094;Sap18	-2.87906	0.0211133	-1.69389	0.000654397
Transcriptional adapter 1	Tada1	-0.974598	0.00736943	-1.69921	0.0809058
Pre-mRNA-splicing factor SPF27	Bcas2	-2.71957	4.75945e-05	-1.70992	0.000312813
Transforming acidic coiled-coil-containing protein 2	Tacc2	-1.33994	0.000215758	-1.71376	0.000293396
NK-tumor recognition protein;Putative peptidyl-prolyl cis-trans isomerase	Nktr	-1.61995	0.00134712	-1.71502	0.000192465
Protein phosphatase Slingshot homolog 2	Ssh2	-1.23988	0.218721	-1.72267	0.0877016
Apolipoprotein B receptor	Apobr	-1.42777	3.36355e-05	-1.72839	0.000114127
Putative oxidoreductase GLYR1	Glyr1	-2.05327	1.12843e-05	-1.73805	4.66381e-05
Pre-mRNA-processing factor 17	Cdc40	-3.67237	0.000404111	-1.74487	0.0131182
Bromodomain-containing protein 7	Brd7	-1.73326	0.0178032	-1.74546	0.0163181
Pre-mRNA-processing factor 40 homolog A	Prpf40a	-2.57563	2.949e-05	-1.76419	0.000463623
Chromodomain-helicase-DNA-binding protein 8	Chd8	-2.22895	1.12843e-05	-1.77885	4.69454e-05
Cyclin-dependent kinase inhibitor 1	Cdkn1a	-1.26097	0.000533068	-1.78405	3.18313e-05
Charged multivesicular body protein 4b	Chmp4b	-1.62124	1.96227e-05	-1.79492	0.00018832
UDP-N-acetylglucosamine--peptide N-acetylglucosaminyltransferase 110 kDa subunit	Ogt	-3.81804	0.000841082	-1.79651	0.000146667
Cell cycle and apoptosis regulator protein 2	Ccar2	-2.30711	2.0269e-05	-1.80978	0.000298347
Parafibromin	Cdc73	-3.0157	0.000799505	-1.81037	0.000109713
pre-mRNA 3 end processing protein WDR33	Wdr33	-2.72872	0.000111135	-1.81102	0.000451066
Serine/threonine-protein phosphatase 4 regulatory subunit 3A;Serine/threonine-protein phosphatase 4 regulatory subunit 3B	Smek1;Smek2	-2.93092	0.00241849	-1.81655	0.00350184
Nucleus accumbens-associated protein 1	Nacc1	-0.75038	0.0123741	-1.82185	0.000473739
E1A-binding protein p400	Ep400	-3.7645	0.00211085	-1.82254	6.03199e-05
Calpastatin	Cast	-1.36687	0.00520589	-1.82555	2.91877e-05
Pre-mRNA-processing-splicing factor 8	Prpf8	-3.99734	4.61706e-06	-1.83309	0.000113023
Cyclin-dependent kinase 13	Cdk13	-2.58252	3.51736e-05	-1.83316	0.000241171
NGFI-A-binding protein 1	Nab1	-2.59829	0.000101484	-1.83499	0.0655296
E3 ubiquitin-protein ligase RBBP6	Rbbp6	-2.58907	1.18324e-05	-1.83883	0.000105626
Pre-mRNA-splicing factor CWC22 homolog	Cwc22;Gm13695;Gm13697	-2.32297	0.000216055	-1.8429	0.0495778
Dihydropyrimidinase-related protein 2	Dpysl2	-1.98665	0.0368968	-1.84369	0.0337941
Protein BUD31 homolog	Bud31	-2.04478	0.00178955	-1.84612	0.000737277
7SK snRNA methylphosphate capping enzyme	Mepce	-1.28253	0.00754635	-1.84829	0.00458878
Protein strawberry notch homolog 1	Sbno1	-2.45172	2.1501e-05	-1.85884	3.69736e-05
RNA-binding protein 25	Rbm25	-2.82808	8.59707e-06	-1.86156	0.000499863
Pre-mRNA-processing factor 19	Prpf19	-2.97467	2.29034e-05	-1.87849	0.00021513
Mitochondrial carrier homolog 2	Mtch2	-0.595179	0.312474	-1.88557	0.113714
Nuclear autoantigenic sperm protein	Nasp	-3.22681	0.00368994	-1.88898	0.129655
Splicing factor 3A subunit 3	Sf3a3	-3.04286	6.24372e-05	-1.88998	6.13661e-05
Set1/Ash2 histone methyltransferase complex subunit ASH2	Ash2l	-3.29297	0.0051793	-1.89231	0.00436456
Kinesin-like protein KIF20B	Kif20b	-1.5691	0.119199	-1.89257	0.000463623
Leucine-rich repeat flightless-interacting protein 1	Lrrfip1	-1.07434	0.000381203	-1.90392	0.00066866
Tyrosine-protein kinase BAZ1B	Baz1b	-1.99903	0.00025386	-1.90542	6.86638e-05
General transcription factor 3C polypeptide 4	Gtf3c4	-1.44045	0.0524988	-1.92374	0.137592
	Ankrd11	-1.47524	0.12876	-1.9244	0.100934
RING finger protein 121	Rnf121	-1.90625	0.000603276	-1.92625	0.00095498
[truncated: 233 more rows]
