# Supplementary material for: HUWE1 controls tristetraprolin proteasomal degradation by regulating its phosphorylation
Source: eLife journal article supplement (doi:10.7554/elife.83159), 2023-02-27
Supplement: fig2-data6 [file Figure 2-source data 6.xlsx]

## Sheet: D3_sorted_vs_D3 unsorted
	mCherry_high_D3			mCherry_low_D3			BFP_high_D3			BFP_low_D3
Gene name	adj.P.Val	logFC	good sgRNA	adj.P.Val	logFC	good sgRNA	adj.P.Val	logFC	good sgRNA	adj.P.Val	logFC	good sgRNA
Ppie	2.5858e-07	3.473	5	0.98369	-7.7259	0	0.0022789	1.3957	5	0.046698	-0.74853	3
Taf1	2.5858e-07	3.4299	4	0.19129	-8.3877	1	0.0029323	1.5532	4	0.13591	0.76087	3
Huwe1	2.5858e-07	2.6238	6	0.98639	-8.944	0	0.21297	-0.8509	1	0.17131	0.20352	3
Snrnp200	2.5858e-07	3.0034	5	0.86676	-6.8938	0	0.026205	2.08	3	0.19002	-4.11	1
Brd4	2.5858e-07	3.3184	5	0.3203	-1.8813	1	2.1468e-05	2.0631	5	0.26915	-2.2293	2
Prpf6	2.5858e-07	3.518	6	0.15519	-5.6994	1	0.0081502	1.3973	5	0.31465	0.39983	3
Isy1	2.5858e-07	3.4532	6	0.98206	-7.2657	0	0.030766	1.2788	4	0.34234	0.055517	2
Prpf4	2.5858e-07	2.9548	5	0.90002	-6.8652	0	0.067401	1.2276	3	0.32992	-1.0241	1
0610009D07Rik	2.5858e-07	3.7513	4	0.38064	-4.7348	1	0.029003	1.6193	3	0.57299	-7.5	1
Hnrnpk	2.5858e-07	3.5894	5	0.92733	-7.3917	0	0.00011717	3.5344	5	0.6875	-6.9554	1
Sap30bp	2.5858e-07	3.3779	6	0.99766	-7.5349	0	0.0092836	1.5326	5	0.83697	-1.1547	1
Ep400	2.5858e-07	3.0179	6	0.77651	-7.3277	0	0.0032328	1.5368	5	0.8379	-2.6621	1
Taf2	2.5858e-07	3.2162	6	0.36971	-7.9288	1	0.00094173	1.1664	6	0.84474	-1.0259	1
Sart1	2.5858e-07	3.274	6	0.96642	-7.0799	0	0.018181	1.5179	4	0.89716	-3.9302	0
Rbm22	2.5858e-07	3.0841	5	0.98609	-7.0699	0	0.00062929	2.0135	6	0.90344	-5.6372	0
Prpf38a	2.5858e-07	3.6633	5	0.93683	-7.3057	0	0.020144	1.078	4	0.94448	-3.2735	0
Bud13	7.7574e-07	2.5697	6	0.69714	-4.6731	0	0.40954	-1.4553	2	0.56379	-1.2618	2
Prpf18	7.7574e-07	3.2304	6	0.70768	-7.1499	0	0.43402	-0.73171	1	0.91638	-1.7944	0
Plrg1	1.2929e-06	2.8638	4	0.71206	-2.7802	0	0.00013941	2.6521	5	0.13669	-6.8496	1
Prpf19	1.2929e-06	2.9583	6	0.96725	-7.5337	0	2.9744e-05	2.276	6	0.92436	-2.3913	0
Tra2b	1.2929e-06	2.6371	5	0.9557	-6.903	0	0.0048323	-0.0034315	2	0.9963	-7.0959	0
Ppil4	1.8101e-06	3.0492	5	0.90971	-5.6587	0	0.7582	-1.0101	0	0.70257	-4.8294	1
Clp1	1.8101e-06	2.8565	6	0.95939	-7.3071	0	0.066693	0.515	3	0.99195	-7.5529	0
Txnl4a	2.3272e-06	2.648	6	0.5512	-6.8732	1	0.050262	0.95119	4	0.79562	-3.6117	1
Slu7	2.8444e-06	2.5128	5	0.84938	-6.7723	0	0.0016344	2.0523	5	0.23691	-0.085392	2
Kat5	3.8787e-06	2.1622	6	0.74202	-6.7482	0	1.0605e-05	1.9697	5	0.48755	-0.315	1
Dhx15	3.8787e-06	2.782	6	0.72075	-7.1516	0	0.0046688	1.0279	5	0.56905	-0.58642	2
Dhx38	1.1119e-05	2.8777	6	0.99259	-7.7596	0	0.40978	-0.18568	2	0.79054	-1.2413	1
Sf1	1.2153e-05	3.082	4	0.24497	-4.5507	1	0.0045571	2.4449	3	0.48225	-2.9848	1
Eftud2	1.267e-05	3.045	5	0.95536	-7.4592	0	0.0096778	2.2692	3	0.98521	-5.4215	0
Cactin	1.3188e-05	2.6405	6	0.79839	-6.7068	0	0.0055084	1.8144	4	0.44022	-0.27267	2
Snip1	1.3705e-05	2.9326	4	0.066669	-6.8665	1	0.00060446	2.1878	6	0.93282	-4.4945	0
Cwc15	1.4222e-05	2.3618	5	0.79553	-2.0347	0	0.047209	-0.054188	2	0.59944	-0.88883	2
Tfip11	1.5773e-05	3.205	4	0.64916	-5.1181	0	0.028534	2.0173	3	0.086696	0.97738	3
Taf7	1.629e-05	2.3723	5	0.45982	-2.0785	1	0.028865	1.1227	4	0.063423	-1.125	2
Snw1	1.7842e-05	2.8691	6	0.98003	-7.5901	0	0.00028529	2.2694	5	0.75745	-1.9736	1
Golt1b	1.8876e-05	2.2434	5	0.24059	-3.0155	1	0.65468	-2.3797	1	0.22652	-0.71492	2
Cwc22	2.1462e-05	3.0196	5	0.96377	-7.2008	0	0.0015713	2.282	5	0.9592	-3.0056	0
Taf8	3.9045e-05	2.1413	4	0.28443	-0.070786	1	0.12332	0.45536	2	0.10293	-2.9043	2
Slc4a7	4.37e-05	1.4541	6	0.70736	-5.4002	0	0.00949	0.73141	5	0.242	-1.4117	1
Irf9	4.5768e-05	1.3583	6	0.32593	-2.8252	1	0.0062455	1.1508	5	0.10921	0.093918	3
Ly96	4.6286e-05	2.3462	6	0.98909	-8.0104	0	0.0039953	0.90486	5	0.07535	0.63094	4
Ccdc94	5.818e-05	2.4954	5	0.045189	-4.2862	1	0.036677	0.97447	4	0.17074	0.63514	3
Kin	6.1283e-05	3.1674	3	0.38191	-5.1829	1	0.72218	-2.5573	0	0.69314	-0.68157	1
Dgcr14	6.4903e-05	2.1972	5	0.73426	-7.5643	0	0.020628	1.3245	4	0.39178	-2.0046	2
Ddx41	7.0075e-05	2.2182	5	0.12966	-0.49416	1	0.16923	-0.10552	3	0.74752	-2.8781	1
Xab2	7.0592e-05	2.9792	4	0.85408	-6.9777	0	0.32174	-0.7163	2	0.90076	-5.8468	0
Tut1	7.4212e-05	2.4113	5	0.61231	-6.6857	0	0.024147	1.0182	4	0.89355	-1.5725	0
Prpf8	8.6107e-05	2.3258	5	0.53201	-7.8956	1	0.00090345	1.8346	5	0.99298	-3.0795	0
Gpkow	8.8175e-05	2.5433	4	0.68594	-4.0803	0	0.41602	-1.1482	1	0.17929	0.62649	2
Bcl6	8.8175e-05	1.1538	6	0.65979	-5.2083	0	0.27977	0.18944	3	0.99702	-1.8182	0
Spink14	0.00010834	1.3386	6	0.11563	0.15654	2	0.60244	-1.1648	1	0.032744	-0.93816	2
Lsm3	0.00011455	2.5578	6	0.021439	-3.6081	2	0.00026253	2.0216	6	0.23596	0.23363	3
Vcpip1	0.00011869	2.25	4	0.91283	-8.0531	0	0.64096	-1.5455	1	0.58838	-0.042274	2
Tlr4	0.00013265	2.1389	4	0.56338	-0.24857	1	0.070611	0.32466	4	0.95557	-1.1472	0
Sart3	0.00013886	2.401	5	0.78875	-7.3663	0	0.020866	0.048302	3	0.30213	-2.9098	2
Psmb7	0.00014299	2.1814	5	0.62292	-4.9584	0	0.063631	0.79263	4	0.082261	0.77858	4
Dad1	0.00016471	2.0502	4	0.84109	-7.4633	0	0.42332	-2.0221	1	0.56719	-0.20566	1
Taf12	0.0001823	2.8964	4	0.4957	-3.9267	0	0.0077084	1.8178	4	0.5223	-0.93235	1
Ticam2	0.00020557	1.5862	5	0.49331	-4.2224	1	0.18932	-1.6807	2	0.89476	-1.1604	0
Sde2	0.00021953	2.1756	4	0.58652	-6.8753	1	0.010998	1.5159	5	0.69614	-0.84687	1
Dhx16	0.00022005	2.27	4	0.12527	-3.867	1	0.083893	0.49693	3	0.023165	1.063	4
Psma5	0.00023557	1.5257	6	0.4141	-3.2607	1	0.029273	0.9032	4	0.046339	-1.5677	2
Cd59b	0.00025832	3.4209	2	0.4736	-4.2375	0	0.76031	-5.1028	0	0.90454	-4.4163	0
Ppwd1	0.00028676	2.6601	5	0.62308	-0.41601	0	0.035145	0.53445	4	0.99205	-5.3418	0
Ifnar1	0.00028935	1.3703	5	0.93012	-3.7431	0	0.50636	-1.439	2	0.49155	-0.29296	2
Fip1l1	0.00029194	2.0428	5	0.90898	-7.8873	0	0.13358	0.090553	3	0.43462	-1.8581	2
Prpf4b	0.00029969	2.0122	5	0.59203	-7.4692	1	0.065816	0.64667	4	0.9433	-1.1895	0
Denr	0.00032762	1.9291	4	0.93351	-4.8512	0	0.079215	0.042483	3	0.7982	-1.6151	1
Taf6	0.00035865	1.95	5	0.9956	-6.1914	0	9.182e-05	1.3691	6	0.83301	-1.9466	1
Nkap	0.0003814	3.6444	2	0.77956	-7.3794	0	0.41117	-0.59546	1	0.61827	-2.9456	0
Sf3a2	0.00038502	1.9716	5	0.26362	-6.7068	1	0.00091069	1.409	5	0.96597	-2.6658	0
Ube3c	0.00039382	2.0778	3	0.99991	-5.2838	0	0.66949	-0.42225	1	0.79198	-0.52331	1
Prpmp5	0.00039433	2.5936	3	0.83354	-8.0094	0	0.76615	-3.2583	0	0.086963	1.227	2
Whsc1l1	0.00043105	1.3647	6	0.062361	-3.0246	3	0.22526	-0.086558	2	0.85064	-1.2199	1
Aqr	0.00048587	2.7464	4	0.88452	-5.2511	0	0.26937	-0.85987	2	0.78716	-1.0101	1
Usp39	0.00049363	1.8743	4	0.99525	-7.4887	0	0.079285	0.56754	4	0.64106	-2.3322	2
Ppp1r14d	0.00055258	1.9887	5	0.8739	-7.0979	0	0.75548	-2.0244	1	0.66567	-2.149	1
Cstb	0.00056758	2.9096	2	0.37213	-1.4879	0	0.26378	-0.15186	1	0.56731	-1.2785	0
Papola	0.00060482	1.6419	5	0.86769	-5.3066	0	0.045672	1.1889	4	0.23964	-0.8557	2
Dhx8	0.00063223	1.9897	4	0.98008	-7.6051	0	0.072316	1.2829	3	0.84511	-4.3134	0
Rhoa	0.00063533	1.5371	6	0.99076	-5.0303	0	0.46068	-0.19488	2	0.78745	-2.9308	1
Pcf11	0.00065757	2.4543	4	0.92298	-7.1625	0	0.027694	0.36743	2	0.8342	-1.02	0
Pomt2	0.00069325	2.0327	6	0.62455	-5.2776	0	0.28678	-1.6439	1	0.34398	-1.3343	2
Th1l	0.00070411	2.0434	6	0.98179	-7.1482	0	0.53487	-0.83735	2	0.24793	-0.12464	3
Cdk11b	0.00070514	2.2513	4	0.9954	-7.8364	0	0.088845	0.18766	2	0.53031	-1.5865	1
Wdr70	0.00078841	1.8311	4	0.76631	-2.1375	0	0.099852	0.062789	2	0.85492	-3.349	1
Gm3336	0.0007972	1.7761	4	0.42637	-2.6288	1	0.26556	-3.164	1	0.20855	0.051554	3
Taf5	0.00082668	1.8991	5	0.97033	-7.4723	0	0.0092815	0.50419	4	0.23193	0.49939	3
1110002N22Rik	0.0008303	0.34476	3	0.60909	-3.0565	0	0.28162	-2.4325	1	0.28758	0.26053	3
Crnkl1	0.0008846	1.6794	5	0.58564	-6.927	1	0.18424	0.51165	3	0.7696	-2.7131	1
Ipo5	0.00095597	1.7008	5	0.46245	-4.4789	1	0.94267	-2.2698	0	0.1184	-0.31024	2
Exoc4	0.00097303	1.389	5	0.12298	-1.2942	1	0.53347	-2.8563	1	0.2638	0.32893	3
Vangl1	0.0010082	0.83715	6	0.043964	-0.6797	2	0.4388	-2.5132	2	0.12353	-0.89833	2
Tmem170b	0.0010341	1.181	5	0.98584	-4.6013	0	0.18266	0.22815	3	0.66948	-2.3393	1
Cdc40	0.0011178	2.8012	3	0.76144	-7.4064	0	0.061677	1.8445	2	0.17479	-1.1031	1
Lsm4	0.0011711	2.2921	5	0.57525	-3.2697	0	0.18682	0.32781	3	0.76805	-0.77018	1
Pabpn1	0.0011778	2.7338	3	0.28942	-0.76046	0	0.44079	-1.3171	0	0.72343	-3.6981	0
Arrb1	0.0012559	2.5276	3	0.29122	-1.463	1	0.30267	-3.1348	1	0.40913	-7.4292	1
Cisd3	0.0012854	0.74911	4	0.13715	-7.3558	2	0.59614	-1.8566	1	0.0569	-0.14178	2
Ocrl	0.0013826	0.019064	2	0.84188	-3.7822	0	0.24102	0.060279	2	0.56814	-4.0399	2
Ric8	0.0013857	1.8256	3	0.67341	-4.593	0	0.4492	-4.9601	1	0.14428	-2.7723	1
Spen	0.0014059	1.2802	6	0.47079	-4.6009	1	0.00077775	0.75484	6	0.26033	-1.9977	1
Bag5	0.0015062	1.9433	4	0.36421	-0.95352	1	0.52251	-1.6846	1	0.4656	-1.1507	2
Higd1b	0.0015186	1.3178	5	0.86632	-5.4606	0	0.7892	-2.9897	1	0.79489	-2.4101	1
Dmap1	0.0015641	2.0742	3	0.98751	-5.2868	0	0.02661	1.471	3	0.66975	-5.7113	1
Trappc5	0.0016081	2.1586	4	0.89373	-2.2061	0	0.81041	-1.4101	0	0.98842	-2.0716	0
Ddx23	0.0016396	1.9178	6	0.37483	-4.7765	1	0.30583	-0.80084	2	0.25037	0.12427	3
Mat2b	0.0016583	1.6252	5	0.077871	-2.2619	2	0.90451	-3.7996	0	0.36588	-0.31873	2
Rbm15	0.0016883	1.0236	6	0.40637	-2.6502	1	0.029181	-4.195	2	0.019822	1.2906	4
Draxin	0.0017082	1.4942	4	0.82002	-4.8869	0	0.044322	0.37942	3	0.50149	-0.11096	2
Adhfe1	0.0017534	-0.66162	3	0.938	-2.9423	0	0.513	-4.7988	1	0.80429	-4.2349	1
Psma6	0.0018067	1.6872	4	0.96644	-6.8652	0	0.034819	1.6012	4	0.12392	0.84021	3
Cyp4a12b	0.001846	1.3421	5	0.53553	-2.8242	1	0.56781	-0.32365	2	0.44668	-0.77485	2
Taf3	0.0019184	0.85843	6	0.34311	-7.4671	1	0.15194	0.24571	3	0.9543	-5.859	0
BC021891	0.0019639	0.85082	6	0.1673	-6.3539	1	0.87881	-2.394	0	0.63063	-0.7468	1
Cyp3a57	0.0020379	1.2297	3	0.9112	-5.3177	0	0.31928	-1.3125	1	0.68767	-0.64425	1
Oit1	0.0020922	-0.35	3	0.61755	-5.4861	1	0.26754	-0.82367	3	0.81109	-0.54233	1
Snap47	0.0021123	1.9673	4	0.80582	-2.1151	0	0.10237	0.68121	2	0.56319	-0.52667	1
Rad9b	0.0021754	1.3005	6	0.67176	-1.2279	0	0.40382	-1.0904	2	0.045062	-1.1162	2
Zmat2	0.002253	2.4275	4	0.97576	-7.7433	0	0.47089	-1.3688	1	0.99421	-4.9256	0
Ankrd17	0.0022866	2.2531	4	0.94466	-5.898	0	0.11762	0.41247	3	0.45671	0.39489	2
Morn1	0.0023756	1.4327	5	0.80386	-2.4919	0	0.38337	-0.40562	2	0.37006	0.032516	2
Nat9	0.0023854	-0.60232	2	0.61114	-2.4916	0	0.52485	-0.97891	1	0.19358	-2.1612	2
Ttk	0.0024371	0.88033	4	0.0074891	-0.020171	3	0.10723	0.10518	3	0.63974	-0.032227	2
Lsm7	0.0025395	2.0294	4	0.85724	-2.5795	0	0.054377	0.55552	2	0.63953	-2.7342	1
Cdc25b	0.0025659	1.1383	6	0.34529	-0.98886	1	0.67144	-2.9181	1	0.69917	-0.8467	1
Mapkbp1	0.0026657	1.8046	3	0.73998	-4.4957	0	0.12786	-1.3466	2	0.16492	-0.22985	2
Lcmt2	0.0026678	1.5156	4	0.41449	-2.9185	1	0.61762	-2.2144	1	0.18583	-0.58779	2
Ces3a	0.0026734	1.1244	4	0.35111	-0.60082	1	0.094994	-0.97358	2	0.98062	-1.6889	0
Ppp2r1b	0.0027205	0.90733	4	0.81798	-3.2106	0	0.3602	-3.6289	1	0.78932	-3.5282	1
Slbp	0.0027965	2.6816	3	0.78246	-3.3055	0	0.19494	0.55044	2	0.853	-1.2791	0
Snrpa1	0.0028089	2.5349	3	0.84965	-6.7278	0	0.12741	1.2916	2	0.68726	-6.8889	0
Csprs	0.0028353	0.83699	3	0.87345	-7.1112	0	0.28326	-0.10115	3	0.018353	-3.2838	2
Sf3b4	0.0028674	2.3378	3	0.92184	-7.7035	0	0.19844	0.77115	2	0.72814	-4.1739	1
Hsp90b1	0.0029072	1.6352	4	0.9872	-2.8264	0	0.029539	-1.8119	2	0.16187	0.019663	3
Ccdc55	0.0029625	1.9745	4	0.25951	-7.009	1	0.13988	0.52625	3	0.99453	-5.2618	0
Fam171b	0.0029972	1.8088	2	0.25741	-3.5231	1	0.94716	-7.1803	0	0.41198	-2.0968	1
Tcfl5	0.0030324	-3.2443	1	0.96146	-6.2131	0	0.52408	-1.1541	1	0.65181	-0.56983	1
Rpgr	0.0031503	0.87953	5	0.69168	-2.4084	0	0.35972	-4.9611	1	0.99449	-3.0925	0
Cxxc1	0.0031927	1.0648	5	0.96427	-2.9649	0	0.73621	-1.4797	1	0.92799	-2.1129	0
Vhl	0.0031947	2.0078	4	0.89703	-6.7949	0	0.022111	1.432	3	0.5273	-3.0623	1
Zdhhc2	0.0032459	-0.62269	3	0.92438	-2.6832	0	0.87809	-1.7181	0	0.21349	0.43714	3
Nacc1	0.003248	2.4683	2	0.3103	-0.70118	0	0.78793	-4.3035	0	0.76772	-3.2987	0
Lsm6	0.0032765	2.8214	2	0.88029	-7.2636	0	0.032193	0.92526	3	0.87532	-7.0774	0
Pyroxd2	0.0032935	1.4869	4	0.595	-2.6247	1	0.57446	-5.3766	1	0.89109	-1.4184	0
Nrgn	0.0032946	2.6448	2	0.87836	-6.873	0	0.12674	0.93971	2	0.82579	-5.3114	0
Hsd17b1	0.0032946	1.7435	4	0.5535	-5.7399	1	0.0466	-2.7482	2	0.84211	-1.6598	1
Prpf3	0.0032982	1.5152	5	0.885	-7.6363	0	0.20154	0.17991	3	0.98786	-2.5994	0
Ing3	0.0033282	1.2271	5	0.20728	-1.8706	2	0.040328	0.82716	4	0.24263	-0.67734	3
Jak1	0.0033571	1.572	5	0.92178	-4.5732	0	0.015384	0.94303	3	0.63229	-1.9287	2
Sfpi1	0.0034145	1.9563	4	0.6314	-4.6862	0	0.86141	-3.5092	0	0.58235	-4.0485	1
Cdk9	0.0035624	0.54854	3	0.99897	-8.1707	0	0.006618	0.79577	5	0.019564	-0.10028	2
Ppil1	0.0035666	1.8756	4	0.97768	-6.8896	0	0.91758	-2.8907	0	0.62493	-3.6773	2
Chrna2	0.0036726	1.3613	4	0.62068	-1.2486	1	0.14679	-0.13867	3	0.31789	-1.9552	2
Ganab	0.0037098	1.6185	4	0.76745	-1.6768	0	0.24206	-0.0082623	3	0.7115	-2.5472	1
Hira	0.0038407	1.8431	4	0.98455	-7.3813	0	0.82027	-1.4159	0	0.99766	-7.4238	0
Gm6484	0.0038546	1.215	3	0.89324	-2.2574	0	0.072897	0.16028	2	0.99539	-4.6075	0
Ranbp2	0.0038774	1.9314	4	0.9876	-5.9693	0	0.096656	0.33061	2	0.63145	-0.7416	1
Bola2	0.0038893	0.19255	1	0.15475	-3.6693	1	0.68881	-1.851	0	0.23678	-0.66536	1
Dbr1	0.0039131	1.4484	5	0.91235	-6.8938	0	0.12652	0.71365	3	0.12381	-0.40944	1
Cnn2	0.0039214	1.4361	5	0.37514	-3.3766	1	0.59562	-2.9114	1	0.59632	-1.3566	2
Zfp319	0.0040289	1.0033	5	0.2832	-1.3197	1	0.051121	-3.3961	2	0.10932	0.76511	3
Lrrc59	0.0041246	1.7175	4	0.82237	-7.6625	0	0.69616	-1.0826	1	0.0040017	0.92163	3
U2af1	0.0041846	0.27427	2	0.47542	-6.7136	1	0.38433	-0.55547	2	0.067083	-6.9062	1
CTRLMM_67169	0.0042198	3.0791	1	0.031034	1.5464	1	0.85513	-5.3227	0	0.48815	-0.75669	0
Pgp	0.0042229	1.9161	4	0.9168	-7.2788	0	0.6597	-3.0916	0	0.45052	-3.7812	1
Nfatc1	0.0042394	1.6898	3	0.69159	-3.2718	0	0.71729	-3.0578	1	0.92992	-0.7914	0
Psma4	0.0042435	1.0792	5	0.97918	-6.8881	0	0.46176	-1.593	1	0.55215	-3.0414	1
Cabin1	0.0042805	1.7989	4	0.3226	-3.0833	1	0.56224	-0.56207	1	0.8023	-4.8204	1
Hnrnpll	0.0043542	2.3254	3	0.19058	-1.1829	2	0.49955	-1.5541	1	0.21717	0.48546	3
Hmgcs1	0.0045119	1.0117	5	0.53744	-1.6707	1	0.29478	-0.74718	2	0.72202	-0.85761	1
CTRLHS_57637	0.0045544	3.1004	1	0.39466	-1.5285	0	0.86827	-6.0321	0	0.46255	-0.64857	0
Pramef6	0.0046573	1.5228	4	0.87405	-2.877	0	0.30181	-3.1	2	0.053279	1.1635	3
Mfap3l	0.0047441	-0.20465	2	0.40439	-7.1946	1	0.98367	-3.7138	0	0.21391	0.10818	3
Smu1	0.0048424	2.392	2	0.84572	-7.3808	0	0.61606	-4.4994	0	0.26831	-3.0754	1
Hddc3	0.0048496	1.199	5	0.628	-3.113	0	0.82726	-2.7348	0	0.13359	0.14637	3
Ttc8	0.0048564	1.4485	4	0.86461	-1.5632	0	0.24275	-4.4573	1	0.43262	-0.77445	2
Orc5	0.0049402	1.0948	4	0.8548	-6.0643	0	0.71852	-1.7434	1	0.056233	0.94128	4
Gpr87	0.0049541	1.1264	5	0.86103	-2.5918	0	0.38446	-0.38673	2	0.041452	-0.89681	2
Gm17455	0.0049681	1.9545	4	0.32093	-0.53639	2	0.82022	-3.6611	0	0.6688	-0.82415	2
Dnajc17	0.0050984	1.764	3	0.82954	-5.4658	0	0.57999	-0.661	1	0.81167	-5.3739	0
Oas2	0.0051212	1.5036	5	0.86546	-1.2526	0	0.54592	-0.089824	2	0.012683	0.86379	4
Ipo13	0.0051739	0.20991	3	0.96849	-7.4904	0	0.43023	-0.98388	2	0.2651	-0.77065	2
Fam32a	0.0052199	2.2644	4	0.93492	-6.9212	0	0.21011	-0.33327	1	0.11846	0.97375	3
Zfp777	0.0053337	1.6861	4	0.92298	-7.6915	0	0.64039	-1.9655	1	0.52646	-1.0682	1
Etnk1	0.0054464	0.51428	3	0.6906	-2.8451	0	0.35905	-1.0264	2	0.27377	0.15275	3
Cyp2d10	0.0054666	-1.2597	3	0.4715	-5.4095	1	0.4742	-0.89153	2	0.59199	-0.66006	2
Cckar	0.0054775	0.86591	5	0.051074	0.23976	3	0.18804	-1.3834	1	0.065097	0.2005	3
CTRLMM_67083	0.0055142	2.9285	1	0.060655	1.058	1	0.3326	-0.47963	0	0.75004	-2.2323	0
Ppp1r17	0.0055814	1.5787	5	0.96978	-7.2151	0	0.66377	-1.8737	1	0.9831	-1.8156	0
Nfe2l2	0.0055882	1.2327	5	0.094783	-0.53706	3	0.54053	-0.91665	1	0.38197	-0.15582	3
Setd5	0.0056073	0.70511	5	0.10109	-0.051047	3	0.49917	-3.0155	1	0.31044	0.18123	3
1600027N09Rik	0.0056378	1.7061	5	0.83534	-3.3485	0	0.43886	-0.066849	2	0.34588	-0.66025	2
Lrrc61	0.005659	1.357	5	0.15496	-2.7541	2	0.66321	-3.1058	1	0.82394	-1.6898	1
Gm9047	0.0056776	-0.70154	3	0.089206	-1.7701	1	0.4356	-1.9509	2	0.38791	0.06968	3
Fkbp7	0.005763	1.2872	5	0.59554	-0.42833	0	0.89942	-2.9586	0	0.19639	0.27929	3
CTRLHS_57046	0.0058333	3.2751	1	0.29573	-1.0931	0	0.7123	-7.6821	0	0.27102	0.42518	1
2700090O03Rik	0.005899	1.6195	4	0.41247	-7.5531	1	0.90791	-1.4851	0	0.30234	-0.64185	1
Ppp1r16b	0.0059083	1.1968	5	0.29297	-0.79814	2	0.61941	-1.8287	1	0.21255	-0.1172	2
Cyp3a59	0.0059372	1.045	5	0.27879	-1.7762	2	0.60312	-1.0792	1	0.23301	-1.7393	2
Fitm2	0.0059409	-2.231	2	0.74281	-1.6938	0	0.07939	-5.702	1	0.94546	-6.5197	0
Cobra1	0.0060531	2.1456	4	0.96342	-7.1341	0	0.38197	-0.014809	2	0.92726	-1.8585	0
Glce	0.006096	1.2019	5	0.69273	-0.58827	0	0.16404	0.10084	2	0.24629	0.43537	3
Proca1	0.0061213	1.7316	3	0.99106	-3.4784	0	0.99606	-5.3166	0	0.63199	-1.6964	1
Isca2	0.0063644	1.33	5	0.66678	-2.9404	0	0.73279	-1.5622	1	0.48289	-2.8688	1
Rpn2	0.0063975	1.8014	4	0.99455	-7.5858	0	0.69811	-0.79593	1	0.99879	-2.5924	0
Tmem140	0.0064973	1.5447	5	0.00010124	1.3738	5	0.96577	-4.1316	0	0.81172	-0.57184	1
BC035044	0.0065046	0.92603	4	0.18289	-2.5341	1	0.048075	0.90207	3	0.36587	-0.14463	1
Ptms	0.0065413	-0.20654	3	0.072298	0.026965	2	0.78065	-4.1877	1	0.99359	-2.9981	0
Zic3	0.0066633	-0.81623	2	0.30244	0.048717	1	0.85083	-2.5527	0	0.21959	-0.78816	1
Mettl10	0.0066646	-1.5073	2	0.13438	-1.8625	2	0.88611	-4.3948	0	0.97411	-2.419	0
Rqcd1	0.0067109	1.6221	5	0.94863	-5.6846	0	0.2047	0.28362	3	0.10115	0.76984	4
Usmg5	0.006729	2.1028	3	0.64315	-1.7953	0	0.29783	0.061361	2	0.52654	-2.9419	1
Eef2	0.006744	1.372	2	0.2421	-1.1325	1	0.94904	-5.2173	0	0.62593	0.060097	1
Fam83e	0.0067533	1.9275	3	0.83228	-5.2424	0	0.83085	-1.8416	0	0.70292	-1.7066	1
Rgl3	0.0067993	1.9096	4	0.64598	-7.8374	0	0.12107	-3.2113	1	0.26756	-0.66633	2
Sf3a3	0.0068112	2.1374	3	0.89708	-7.1277	0	0.031305	1.4906	3	0.19738	-2.3155	1
Zfp462	0.0068293	0.24674	2	0.94956	-2.3254	0	0.62768	-0.86204	1	0.12292	0.17853	2
Strbp	0.0068619	0.50186	3	0.36383	-1.2647	1	0.55439	-2.0483	1	0.93336	-1.8028	0
Pih1d1	0.0069162	-0.010357	3	0.71637	-0.85068	0	0.62557	-5.5926	1	0.042541	0.66494	4
Dusp10	0.0070558	1.5717	4	0.55567	-2.4565	1	0.99386	-6.6921	0	0.8722	-2.834	1
CTRLHS_57939	0.0070812	2.7689	1	0.10556	0.56644	1	0.89506	-4.7063	0	0.17011	0.80915	1
Kif18b	0.0070812	0.96942	5	0.45099	-1.2452	1	0.94876	-2.9548	0	0.79472	-1.135	1
Rnf103	0.007136	1.8397	4	0.69729	-0.36359	0	0.83548	-1.0632	0	0.58968	-1.1075	1
Acbd6	0.007225	1.8438	4	0.25035	-5.9514	1	0.988	-5.3518	0	0.72862	-1.935	1
Chst3	0.0073992	-1.2994	3	0.016466	-0.62765	3	0.90308	-1.6508	0	0.017095	1.1918	5
Cwf19l2	0.0074034	1.8558	5	0.56634	-7.8549	0	0.1121	-1.8416	1	0.54538	-0.54878	2
Egfl8	0.0074132	0.9569	5	0.56935	-2.9402	0	0.34296	-1.5445	2	0.48175	-0.43592	1
Dcp2	0.0074308	1.6391	4	0.81729	-3.8957	0	0.086381	0.61989	4	0.44741	-3.4175	2
Zfp329	0.0074711	1.6524	3	0.56126	-3.5443	0	0.37759	-0.35256	1	0.69949	0.20818	1
Papolb	0.0074954	0.14647	2	0.68297	-3.3243	0	0.36978	-1.8061	2	0.53569	-0.23415	1
Papln	0.0076242	1.0781	5	0.011471	-0.28602	3	0.87911	-3.0923	0	0.87421	-2.3555	0
Ppargc1b	0.0078192	0.83026	5	0.95104	-5.1932	0	0.41267	-2.6794	1	0.92391	-1.404	0
Pdap1	0.0079195	1.171	4	0.91348	-2.1638	0	0.83937	-3.7839	0	0.14464	-0.67899	3
Irs1	0.007994	-0.58677	3	0.39321	-1.1751	1	0.37343	-0.79072	1	0.065305	-0.043455	3
2610528A11Rik	0.0080472	2.1452	3	0.36912	-0.17617	1	0.050036	-0.54551	1	0.5593	-0.57144	1
Ncoa4	0.0081093	0.84961	3	0.89703	-1.3456	0	0.54989	-2.0353	1	0.4761	-0.49507	2
CTRLMM_66407	0.0081558	2.9682	1	0.54269	-2.9603	0	0.81916	-5.8457	0	0.89461	-8.0839	0
CTRLMM_66550	0.0082101	3.3442	1	0.54149	-7.0344	0	0.61041	-7.2383	0	0.6183	-3.0563	0
Rnps1	0.0082337	1.6327	3	0.78296	-7.3106	0	0.12342	1.1684	2	0.17184	0.83417	2
Ccnd1	0.0083337	1.0633	5	0.58879	-2.5635	1	0.015887	1.2299	4	0.27983	-0.13532	2
Tfpt	0.008612	1.3858	4	0.44922	-2.4439	1	0.060022	1.2001	3	0.54894	-1.7076	1
Cpsf4	0.0086497	1.2571	4	0.10084	-3.214	1	0.87147	-1.0323	0	0.40548	0.24095	3
S100a11	0.008855	1.2449	2	0.95329	-7.4933	0	0.41319	-2.6766	1	0.0059763	1.7497	3
Snrpb	0.0089911	2.0705	4	0.11542	-7.022	1	0.021059	1.5488	4	0.71357	-0.11333	1
Taf1c	0.0090298	-2.5866	2	0.84526	-2.0235	0	0.98774	-4.8348	0	0.45911	-1.2001	2
Desi1	0.0090474	-0.87529	1	0.52606	-2.0436	0	0.91226	-2.4614	0	0.96079	-2.7324	0
Tlk2	0.0090852	0.44699	3	0.5515	-3.2776	1	0.43364	-0.47475	2	0.90943	-0.82371	0
Slc22a13	0.0091002	1.0452	3	0.38411	-1.4241	1	0.35253	-1.6745	1	0.71509	-0.041226	1
2610305D13Rik	0.009109	1.0928	4	0.89401	-3.7204	0	0.26594	-1.1381	3	0.98996	-4.3741	0
Spesp1	0.0091234	0.85268	5	0.20319	-1.0285	2	0.12366	-3.1081	2	0.71261	-2.105	1
Fam136a	0.0091379	2.5058	2	0.11941	-1.173	1	0.64678	-4.4671	0	0.26128	-4.3647	1
Lrg1	0.0091658	0.92077	3	0.9948	-4.0294	0	0.89356	-2.9689	0	0.88458	-0.59829	0
Gpx2	0.0094244	0.6781	5	0.73003	-1.1781	0	0.47821	-1.2992	2	0.56199	-0.34797	2
Depdc1a	0.0095056	0.72784	5	0.84576	-1.2547	0	0.26346	-1.392	2	0.95808	-1.7172	0
Prkcq	0.0095374	0.7863	5	0.14159	-1.6212	2	0.0025919	0.8831	5	0.21975	-0.31198	3
4930503E14Rik	0.0096551	0.8393	2	0.97128	-7.2954	0	0.082487	0.51503	2	0.99277	-4.6279	0
Hs6st2	0.0096623	1.2589	4	0.28692	-3.9854	2	0.90728	-1.9294	0	0.97589	-2.7813	0
Parp16	0.0098278	-1.0169	1	0.70744	-2.8243	0	0.43046	-0.21985	2	0.15495	0.44688	4
Irf8	0.0098811	0.68488	5	0.75726	-1.367	0	0.21088	0.15538	3	0.20382	0.2057	3
Rap1gap2	0.0098863	1.1967	5	0.99151	-2.6424	0	0.60429	-0.92043	1	0.58708	-1.68	2
Theg	0.0098981	0.5528	3	0.70014	-1.0842	0	0.27616	-1.3894	2	0.52962	-1.6123	2
Uba1	0.009955	1.1718	4	0.45522	-2.411	1	0.17414	-0.36821	3	0.35584	-0.213	3
Clip2	0.0099721	0.88641	5	0.86293	-6.1784	0	0.30542	-2.3396	1	0.22321	-3.374	1
Sult2a7	0.0099814	2.014	4	0.60168	-1.3605	0	0.11536	0.6848	3	0.11838	-2.745	2
Smndc1	0.010117	1.7968	5	0.99359	-7.7865	0	0.095246	0.4112	3	0.59614	-2.6637	2
Nek6	0.010141	0.47686	3	0.80478	-2.7333	0	0.16524	-0.49866	3	0.38246	0.12715	3
Rdh8	0.010179	1.7767	3	0.82161	-3.92	0	0.61209	-1.0668	1	0.4198	-0.52519	2
Ikbkb	0.010267	0.32037	3	0.15791	-3.5662	2	0.099112	-1.9735	1	0.87216	-1.2135	0
Hmg20a	0.010322	-0.51205	3	0.27105	-4.9502	1	0.89035	-5.0057	0	0.067666	0.13149	3
Sox2	0.01033	1.6937	3	0.81879	-2.5765	0	0.70149	-3.5814	1	0.46039	-1.4348	2
Krtap4-2	0.010383	2.6008	1	0.42315	-1.3256	0	0.28515	-0.13773	0	0.18671	0.70792	1
Lmna	0.010388	0.48669	4	0.011194	-0.32194	2	0.21784	-0.96772	2	0.61786	-1.0534	1
Gabra4	0.01045	1.1154	4	0.67517	-1.4683	0	0.037103	-0.58811	2	0.57299	-0.12069	2
Rassf3	0.010475	1.6628	4	0.17906	-0.81677	2	0.60537	-2.2984	1	0.30896	0.30221	3
Pfkfb1	0.010506	0.6719	5	0.18127	-0.3249	2	0.11833	-0.95269	3	0.12133	0.36805	4
Tm4sf4	0.010577	1.5712	4	0.93109	-2.1959	0	0.87908	-3.0017	0	0.001471	-2.6832	1
Gdpd5	0.010717	1.0263	3	0.78509	-7.1913	0	0.07461	0.35358	3	0.37089	0.27208	3
CTRLHS_57183	0.010819	2.5614	1	0.44643	-1.3916	0	0.93925	-5.2309	0	0.41889	-0.33596	0
Cd37	0.010826	-0.71376	3	0.19583	-2.2008	1	0.50885	-1.3911	2	0.60575	-3.981	1
Adra1d	0.010878	1.1527	5	0.20549	-0.38359	2	0.15994	-1.1766	2	0.30208	0.10996	3
Hoxd8	0.010887	0.058044	1	0.069379	0.19639	1	0.64862	-3.3626	0	0.42612	-1.3489	1
1810006K21Rik	0.010893	1.7729	3	0.92188	-7.8894	0	0.56301	-0.16392	1	0.32756	-0.21797	2
Zfp691	0.01092	-0.64892	2	0.77087	-2.5311	0	0.012841	0.57185	5	0.86056	-1.4439	1
Btnl6	0.010933	2.0677	3	0.94464	-7.2949	0	0.15115	-3.4453	1	0.59023	-0.69393	1
Tbl1x	0.011049	0.83014	4	0.60789	-1.7473	1	0.024625	-0.44551	2	0.048726	0.74699	4
2010001E11Rik	0.011075	2.2302	4	0.20472	-1.6004	2	0.30361	-5.4042	1	0.055523	1.4221	3
Gstt3	0.011079	1.3238	4	0.3091	-3.2606	1	0.80087	-3.441	0	0.26147	-0.28952	3
Tmtc1	0.011271	-0.96078	3	0.86217	-2.1377	0	0.51103	-2.1905	2	0.85875	-3.4494	1
Gas2l3	0.011304	1.4843	4	0.16694	-0.54945	2	0.57226	-5.4213	1	0.56963	-1.0463	2
Liph	0.011327	0.99457	4	0.56546	-2.6753	0	0.93807	-3.9727	0	0.64317	-0.9781	1
Dio3	0.011601	1.175	5	0.40446	-2.8707	1	0.28851	-0.64943	2	0.11021	-1.136	2
Sez6	0.011624	1.5036	3	0.63927	-3.1192	0	0.51542	-2.0267	1	0.6043	-1.2398	1
Cd22	0.01168	-0.27568	2	0.1997	-0.27868	2	0.32475	-0.64716	2	0.01788	-0.79412	2
Brap	0.011692	1.3592	4	0.99958	-5.4939	0	0.74359	-2.5579	0	0.06268	0.98306	3
BC017643	0.011709	0.97492	5	0.07618	-0.65316	3	0.99999	-4.9892	0	0.85061	-0.48924	1
Rhod	0.011768	1.4618	4	0.14771	-7.1585	1	0.97601	-4.4547	0	0.40456	-2.7556	2
Sulf2	0.011911	0.90144	3	0.40244	-2.3217	1	0.0085633	-4.4974	2	0.060548	0.97762	3
Sstr4	0.012005	1.2041	4	0.99907	-7.9656	0	0.51538	-3.7317	1	0.63904	-0.67726	2
4930430F08Rik	0.012017	-2.006	2	0.73788	-0.9245	0	0.90537	-5.0835	0	0.99822	-4.8878	0
Rasa2	0.012022	0.62877	5	0.424	-1.6627	1	0.20038	-2.869	2	0.23818	0.38008	3
Hectd3	0.012042	-0.011828	2	0.5915	-2.4798	1	0.65687	-5.9579	1	0.14849	0.24105	3
Mms19	0.012068	1.3931	4	0.40227	-4.8142	1	0.42341	-1.2799	2	0.59337	-0.61011	1
Tuba1a	0.01214	-3.2875	2	0.9691	-7.2446	0	0.32822	-1.5251	2	0.84918	-2.7195	0
Dppa2	0.012212	0.94526	5	0.14159	-1.614	1	0.017665	1.4906	4	0.13781	-1.3128	3
Prpsap2	0.012219	1.341	4	0.23156	-1.2567	2	0.75179	-1.845	1	0.74943	-1.6503	1
Tmem149	0.012262	-0.04081	3	0.0075217	1.112	3	0.82439	-4.3474	0	0.041865	1.0734	4
Slc22a5	0.01228	0.56635	4	0.14478	0.13896	2	0.24548	-2.7605	1	0.49625	-1.526	1
Rbm4	0.012284	0.14334	1	0.88836	-7.8499	0	0.10305	1.5008	2	0.28673	-1.8335	1
Cdadc1	0.012327	1.4619	4	0.58495	-0.99927	1	0.23076	-0.4505	2	0.23904	-0.72656	2
Lefty1	0.012442	1.642	3	0.53556	-2.7524	1	0.76175	-4.5539	0	0.88964	-1.6852	0
Slc26a6	0.012517	-0.38	3	0.54738	-0.95982	1	0.72021	-3.948	1	0.3629	-0.057646	3
Vmn1r238	0.012662	-0.048267	2	0.96806	-7.1832	0	0.52229	-4.5291	1	0.98733	-2.9822	0
Rpl8	0.012697	3.3211	1	0.46762	-6.6935	0	0.246	0.25741	0	0.25178	0.67255	1
Fntb	0.012819	-2.6863	1	0.36385	-1.8013	1	0.33906	-1.7482	1	0.5921	-1.2545	2
Cnot4	0.012901	0.57016	4	0.80173	-3.4985	0	0.87049	-2.8733	0	0.70886	-1.151	1
Rpl36a	0.012934	1.8357	3	0.95823	-7.2137	0	0.64257	-2.6369	1	0.35754	0.14781	2
Hsd3b7	0.012942	1.1512	5	0.37358	-3.2599	1	0.83241	-1.4119	0	0.98735	-4.4243	0
Tktl2	0.012952	0.44937	3	0.25488	-0.91128	2	0.15624	0.26331	3	0.7817	-1.0071	1
Il25	0.012959	1.6655	3	0.077603	-0.066288	2	0.94477	-3.3689	0	0.25135	0.32224	3
Gtf2a2	0.012969	-2.9476	1	0.85536	-1.4882	0	0.94185	-2.5173	0	0.39383	-1.2285	1
Alpk3	0.01301	1.8267	3	0.22317	-2.4621	1	0.30244	0.16809	2	0.20461	0.51585	3
Ube2a	0.013092	0.7145	3	0.42161	-0.47666	1	0.5215	-1.5751	2	0.61954	-0.22306	2
BC018507	0.013115	1.5768	4	0.47067	-7.5731	1	0.053227	-0.25236	2	0.29125	-1.5094	1
Ndufs3	0.013128	-0.5375	2	0.50928	-5.4308	1	0.34165	-3.2558	2	0.13634	-1.4017	2
AV320801	0.013249	-0.2004	2	0.50616	-0.72627	0	0.78471	-3.4178	0	0.87844	-7.4083	0
Avil	0.013592	-0.13741	3	0.62139	-1.7414	1	0.12907	-1.1339	1	0.95905	-1.5528	0
Tmod4	0.013612	-0.72328	1	0.30189	-2.0526	1	0.5102	-2.6995	1	0.75951	-4.2212	1
Gm12695	0.013643	-0.36841	3	0.67624	-2.5926	0	0.75163	-3.7431	1	0.37918	-0.076776	3
Ms4a4d	0.013644	1.0544	3	0.21239	-1.0125	2	0.97512	-4.4075	0	0.56984	-0.59662	1
Dnajc4	0.013664	1.3705	4	0.7333	-4.6064	0	0.67978	-0.55832	1	0.94965	-1.7364	0
Bpifb3	0.013685	0.88141	5	0.61488	-2.2837	1	0.76348	-4.7625	1	0.55352	-0.46425	2
Ythdc2	0.013703	-0.71824	3	0.98689	-4.676	0	0.2062	-0.25971	2	0.0099235	1.542	4
D14Ertd449e	0.013799	1.7484	3	0.16683	-0.32469	2	0.64049	-2.3901	1	0.46594	-0.56292	2
Stard7	0.013913	-3.6071	2	0.98726	-5.9356	0	0.49689	-2.3434	1	0.10308	0.047002	3
Apbb1ip	0.013929	2.0042	3	0.010089	-0.59404	2	0.70535	-1.2481	1	0.19366	0.40917	3
BC032203	0.014109	0.39511	3	0.4916	-1.323	1	0.16831	-0.69784	2	0.51167	-0.6185	2
Cldn12	0.014169	-0.28945	3	0.053005	-1.8953	2	0.14076	-4.3294	2	0.58702	-1.424	2
Slc30a4	0.014282	-1.589	3	0.22852	-2.9182	1	0.86427	-1.7735	0	0.24945	-2.0909	1
Hsd3b1	0.014398	0.53439	3	0.62119	-6.9354	0	0.41226	-0.61037	2	0.15547	0.040513	3
Rod1	0.01441	0.64414	5	0.079222	-1.732	1	0.2101	-1.4989	2	0.38055	-0.26419	2
Emb	0.014482	0.90239	4	0.006226	-0.62546	2	0.97979	-3.5946	0	0.11322	-0.19435	2
Brpf3	0.01454	1.0689	4	0.14026	-2.0239	1	0.79134	-5.2047	0	0.10612	0.0077138	2
Gm9125	0.014679	0.020785	1	0.27651	-3.7008	1	0.078027	1.2782	2	0.28569	-1.4845	1
Sf3b1	0.014857	1.0768	4	0.66202	-2.3283	0	0.088294	0.88847	3	0.74741	-1.1296	0
Zfp12	0.01488	0.11411	2	0.40208	-1.2312	1	0.47597	-0.92327	2	0.77071	-1.0443	1
Pdzrn3	0.014886	-0.92322	2	0.372	-0.73151	1	0.34641	-1.715	2	0.73378	-2.1407	1
Bbc3	0.014903	1.5662	4	0.038245	-0.19271	2	0.44083	-3.4439	1	0.47275	-0.99649	2
Noxo1	0.014918	0.72287	4	0.14748	-0.17367	2	0.53293	-0.21113	2	0.3982	-0.73141	2
Egr1	0.014965	1.069	4	0.82683	-1.1177	0	0.76599	-1.8983	1	0.68186	-0.20022	1
Vmn1r70	0.015065	0.47058	3	0.55354	-7.3367	1	0.95682	-4.408	0	0.24671	-0.058268	3
Whsc2	0.015069	1.3539	3	0.15611	-3.17	1	0.21001	0.4569	2	0.95688	-4.2983	0
Spint2	0.015084	1.6065	4	0.53444	-2.8354	1	0.31279	-4.6649	1	0.22422	0.49839	3
Pde9a	0.015087	1.2726	4	0.78416	-3.9345	0	0.91669	-0.97509	0	0.69177	-2.8664	1
Zfp52	0.015129	-0.48468	2	0.91762	-3.2565	0	0.040624	-1.8546	3	0.94094	-2.3296	0
Ik	0.015166	1.6453	4	0.8106	-7.0757	0	0.84303	-3.2271	0	0.35376	-0.75186	2
Spint4	0.015454	-0.99604	2	0.63895	-2.0124	0	0.82322	-2.0319	0	0.50519	-1.7953	1
Siah1b	0.015474	1.9402	3	0.50921	-4.8026	1	0.037658	0.90283	4	0.38778	0.19977	2
Dcdc2b	0.015534	0.91247	3	0.73265	-0.73499	0	0.65013	-3.2735	1	0.7129	-0.18128	1
Cenpe	0.015658	0.56948	5	0.79109	-2.0776	0	0.62284	-0.85651	1	0.29175	0.235	3
Tulp4	0.015674	1.1979	4	0.86019	-1.7237	0	0.90725	-2.16	0	0.11073	-1.9317	1
Scube2	0.015679	0.89568	5	0.75147	-3.4594	0	0.92114	-4.0465	0	0.07177	-0.57951	2
Pla2g2a	0.015743	0.7753	4	0.69192	-3.2844	0	0.95127	-2.3903	0	0.066385	1.0309	3
4932418E24Rik	0.01581	1.5426	3	0.39876	-1.2487	1	0.28378	0.08056	2	0.12014	0.94665	3
Foxr2	0.015885	1.0164	4	0.45024	-1.5931	1	0.97178	-5.9494	0	0.64666	-2.5267	1
Ndnl2	0.01597	0.98457	5	0.62892	-2.4331	0	0.66638	-4.8254	1	0.24616	0.15876	3
Zfp454	0.015972	1.9749	3	0.51408	-1.2544	1	0.7229	-5.2463	1	0.96442	-3.4811	0
Pitpna	0.016002	-0.84367	2	0.27096	-7.9557	1	0.2325	-2.4971	1	0.59869	-3.4104	1
Stt3b	0.016059	1.4569	4	0.84622	-5.4688	0	0.95304	-2.9158	0	0.64429	0.062899	2
Elovl5	0.016111	1.1132	5	0.48174	-2.0459	1	0.38576	-1.7242	2	0.4441	-0.99514	2
Vmn2r53	0.016256	1.0502	4	0.94627	-7.148	0	0.49502	-4.1617	1	0.056006	-2.9699	1
Pitx3	0.016299	1.2257	3	0.50703	-1.4145	0	0.32739	-2.8544	1	0.74378	-2.9321	0
Plscr1	0.016305	1.4006	4	0.83025	-2.0124	0	0.33345	-1.1717	1	0.56925	-0.54529	1
Rbm8a	0.016309	2.44	2	0.71378	-6.9936	0	0.56624	-2.0244	0	0.83521	-5.294	0
Nhlh1	0.016317	0.22324	2	0.41738	-3.2064	1	0.25298	-1.3546	2	0.71537	-1.2732	1
Dguok	0.016381	-0.15636	3	0.84961	-1.5314	0	0.0077576	-0.10986	2	0.44103	-0.35435	1
Osta	0.016415	-0.18662	3	0.035875	-0.057371	3	0.35665	-0.5712	1	0.033084	0.7727	4
Lepre1	0.01643	1.7315	4	0.054383	0.33614	3	0.92159	-3.0616	0	0.32171	-0.54483	1
Satl1	0.016468	0.85073	3	0.56868	-0.41575	1	0.79467	-2.9937	1	0.79495	-1.3897	1
P2ry13	0.016512	1.1609	4	0.091713	-1.2018	2	0.5906	-0.82161	1	0.26868	0.041175	3
Ftmt	0.016531	0.74309	3	0.40823	-6.3948	1	0.36559	-2.5505	1	0.93254	-2.2503	0
Slc6a6	0.016553	1.3774	4	0.65553	-2.3617	0	0.51726	-0.81721	2	0.43492	-0.68596	2
Ap2m1	0.016614	0.84826	4	0.89691	-4.8479	0	0.20061	-1.0932	1	0.17332	0.56017	3
Wdr67	0.016656	-1.7244	2	0.86203	-6.7143	0	0.80797	-2.718	0	0.68005	-2.2271	1
Ftsj2	0.016667	0.61541	5	0.90536	-2.0625	0	0.90747	-2.8664	0	0.36338	-1.5391	2
Eps8l2	0.016881	1.8334	3	0.46132	-4.9635	1	0.35827	-3.165	1	0.59403	-2.9926	1
Ceacam5	0.016904	1.5592	3	0.88283	-2.0791	0	0.28499	-1.6915	1	0.42072	-0.8414	2
Yod1	0.016934	0.61471	3	0.65159	-1.1515	0	0.33796	-1.8567	2	0.038334	-0.34703	2
Ptgs1	0.016943	0.51231	5	0.149	-0.63424	2	0.97656	-2.249	0	0.78031	-0.96851	1
Dus4l	0.016991	0.064394	3	0.8254	-1.5022	0	0.10525	-0.55265	3	0.45604	-0.42367	1
Cldn19	0.01709	1.675	4	0.054244	0.29363	3	0.53611	-1.8393	1	0.87015	-1.16	0
Pak7	0.017187	0.83981	3	0.85913	-1.9938	0	0.15199	-0.21443	3	0.34745	0.22328	3
Rbm27	0.017294	0.9056	5	0.25324	-5.0189	1	0.55466	-0.88858	2	0.4563	-1.5109	2
Calcr	0.017329	-0.0045502	3	0.88455	-1.5064	0	0.35696	-1.0661	2	0.022217	0.40183	5
Srms	0.01736	0.30239	3	0.085556	-0.26677	3	0.91662	-3.552	0	0.98629	-2.8604	0
Otof	0.017418	1.5697	3	0.36605	-1.648	1	0.30851	0.151	2	0.058109	0.086178	2
Accn5	0.017474	-1.3762	2	0.3501	-1.2686	1	0.2911	-2.229	2	0.64575	-0.91291	1
Fgr	0.01751	0.83475	4	0.45263	-1.8021	1	0.25523	-0.86552	1	0.43508	-1.8255	2
Capza3	0.017551	1.0667	4	0.78492	-2.381	0	0.41538	-2.1615	2	0.057174	0.7167	4
CTRLMM_66581	0.01772	2.8585	1	0.2523	-0.69074	0	0.26784	-0.030358	0	0.067783	1.9066	1
Slc45a4	0.017799	0.98233	5	0.89639	-4.576	0	0.30923	-3.1295	1	0.29599	-5.1693	2
Tmem190	0.017802	0.19986	2	0.65891	-6.9942	0	0.41027	-0.37232	2	0.52687	-1.0035	1
Vmn1r68	0.017937	0.50816	3	0.31335	-1.4974	1	0.51503	-1.3957	1	0.73198	-0.35561	1
Lrp10	0.017963	0.44338	3	0.18256	-1.3106	2	0.083883	0.53111	3	0.65165	-0.94458	1
Ankrd16	0.018018	0.44416	3	0.9396	-3.0876	0	0.84801	-3.6848	0	0.4012	-1.7125	1
Ecd	0.018117	1.1627	4	0.99474	-5.7758	0	0.81042	-4.7007	0	0.74777	-1.9825	1
Magoh	0.018246	2.2058	3	0.77236	-7.3293	0	0.76167	-1.2448	0	0.88693	-6.6597	0
Igf1	0.018344	-1.0428	3	0.94647	-3.3652	0	0.58705	-0.84279	1	0.024189	-0.40834	3
Sepx1	0.018378	0.87555	2	0.087396	0.19642	1	0.65397	-1.9878	0	0.73161	-1.6456	0
Asb8	0.018381	0.74996	3	0.11167	-1.2598	2	0.078573	-0.061679	3	0.46938	-0.1766	2
Csmd2	0.018398	1.4997	3	0.62105	-2.1069	0	0.10099	0.24993	3	0.2819	-0.74226	1
Mrpl20	0.018531	-1.408	2	0.94668	-4.3134	0	0.029745	1.3869	3	0.91425	-1.5816	0
Celf1	0.018565	0.83219	3	0.50253	-2.6121	1	0.01072	0.77871	4	0.31167	-0.77923	2
Stox2	0.018609	0.72379	5	0.15998	-3.2618	1	0.60768	-1.9151	1	0.0096917	-0.60943	2
Pcnxl4	0.018631	0.023012	1	0.68849	-3.3676	0	0.7375	-6.6952	0	0.44874	-4.8012	1
Il27	0.01866	1.2122	4	0.12477	-3.1939	2	0.59362	-0.83714	1	0.73552	-2.8491	1
Aldh1b1	0.018893	0.96438	4	0.44355	-1.2006	1	0.45124	-2.6974	1	0.0079122	0.21773	3
Orm3	0.018898	0.64608	5	0.024457	0.42725	3	0.1802	-2.1457	2	0.72869	-0.94579	1
Efs	0.018899	1.2401	4	0.59734	-4.9705	1	0.21224	-2.4471	2	0.011075	0.29416	3
Mylk	0.018926	1.2505	4	0.39776	-1.5363	1	0.4714	-3.5873	2	0.094314	0.86715	3
Nme4	0.01896	1.1144	5	0.069953	-0.74273	2	0.45253	-1.5698	2	0.41987	-1.8433	2
Ahsg	0.018975	0.36789	3	0.85348	-4.0179	0	0.53091	-5.1689	1	0.71663	-0.54527	1
Psmd9	0.019056	1.0022	4	0.086181	-5.1239	2	0.11062	-0.31199	2	0.48314	-0.82871	1
Insl6	0.019069	-1.1737	2	0.91257	-7.5863	0	0.18488	0.27587	2	0.40855	-1.0361	2
Cav2	0.019141	0.67763	3	0.92524	-4.2288	0	0.91026	-6.0873	0	0.86234	-0.75546	0
Ppapdc3	0.019242	-0.91379	1	0.1868	-1.0675	2	0.19789	-3.9807	2	0.83215	-0.67347	0
Rexo1	0.01925	1.5806	3	0.15653	-2.0938	1	0.29913	-2.3978	2	0.56045	-1.314	1
Mmp28	0.019275	1.478	3	0.33042	-0.91126	1	0.15702	-3.8545	1	0.55129	-0.062385	2
Ripk2	0.019314	1.1983	4	0.31059	-1.3043	1	0.16088	-1.838	2	0.076009	0.442	3
Camk1d	0.019422	0.78972	5	0.7354	-0.45233	0	0.92008	-4.0932	0	0.85039	-2.3644	0
Atp6v0e	0.01948	1.7101	3	0.28447	-5.2966	1	0.39699	-6.2944	1	0.90479	-1.8107	0
Syt5	0.01959	0.78132	5	0.46608	-1.2912	1	0.59064	-1.5549	1	0.53049	-0.7509	2
Prdm13	0.019611	1.5433	4	0.21261	-0.7266	2	0.96874	-4.0218	0	0.78841	0.11245	1
CTRLMM_67337	0.019656	2.4083	1	0.43231	-1.5341	0	0.56122	-1.8792	0	0.96363	-6.156	0
Spag11b	0.019811	0.83609	5	0.68095	-0.45416	0	0.60331	-1.0694	1	0.37988	-0.88377	3
Ugt1a9	0.019902	1.0434	4	0.84626	-6.1475	0	0.8801	-1.271	0	0.72621	-4.4046	1
Bbx	0.019916	0.78738	4	0.54752	-1.7237	1	0.046717	1.1733	3	0.88548	-0.48874	0
B3gnt8	0.019921	-0.40934	2	0.35973	-1.9347	1	0.15435	-0.83356	2	0.74925	-0.91814	1
Gm6034	0.019932	1.3989	4	0.76618	-2.3905	0	0.36808	-0.88962	1	0.069616	-0.018163	2
Zbtb34	0.019978	0.95481	3	0.84759	-3.5109	0	0.050925	-0.9152	1	0.010187	1.3677	4
Zfp13	0.019983	0.82678	4	0.28856	-0.84247	1	0.64812	-1.5014	1	0.3303	0.041988	2
Edar	0.020013	0.006314	2	0.52963	-1.9727	0	0.85101	-3.1169	0	0.21716	0.46338	3
CTRLHS_57970	0.020013	2.4373	1	0.62412	-2.6978	0	0.87652	-5.3988	0	0.1163	1.1974	1
Mapre3	0.02006	0.084469	3	0.30645	-1.7846	2	0.2297	-2.1751	2	0.335	-0.10819	2
Trim40	0.02009	1.0418	5	0.72599	-4.2035	0	0.4934	-2.8481	2	0.77611	-1.9894	1
Hnrnpab	0.020147	-4.2421	1	0.20694	-4.9154	1	0.57199	-2.1583	1	0.9208	-1.6329	0
CTRLHS_57453	0.020156	2.2042	1	0.042681	1.1581	1	0.22364	0.27881	1	0.014584	2.2339	1
Akirin2	0.020206	-1.9152	1	0.78399	-7.1267	0	0.67412	-2.1714	0	0.92706	-7.3198	0
Slc1a3	0.020242	0.88324	4	0.43715	-1.5652	1	0.28902	-0.24854	3	0.12744	0.090115	3
Itgb2l	0.020347	0.94382	4	0.20746	-1.8673	1	0.48415	-3.3396	1	0.78686	-0.92392	1
Apoa2	0.020366	1.0169	3	0.97376	-4.4905	0	0.9853	-5.6068	0	0.72308	-3.1544	0
Tssk1	0.020406	0.67888	5	0.30877	-3.4052	1	0.1616	-1.3854	1	0.98565	-7.3036	0
Egln1	0.020475	1.27	4	0.93505	-7.7209	0	0.26975	-0.085365	2	0.49714	-4.1887	1
Rad54l	0.020483	1.1162	4	0.031843	-0.4941	2	0.11365	-0.22458	2	0.25017	-0.24785	2
Taf7l	0.020493	0.61696	5	0.82165	-3.8634	0	0.37604	-1.4565	1	0.71917	-1.8078	1
Cldn8	0.020637	2.0029	3	0.83823	-4.4867	0	0.51275	-2.6475	1	0.32004	-0.48242	1
Spag5	0.020713	-0.36274	2	0.68574	-7.5136	0	0.097088	-0.31125	2	0.41622	-0.4516	2
Gpr101	0.02079	0.91959	5	0.16353	-0.44453	2	0.40274	-0.23693	2	0.23462	-0.26731	3
Lig4	0.020833	1.2263	3	0.12961	-0.45476	2	0.12871	-2.0144	1	0.13511	0.34226	2
Maml2	0.020875	0.90397	3	0.37662	-0.11016	1	0.58125	-4.3445	1	0.29599	0.34733	3
Mei1	0.020901	0.90393	4	0.84866	-1.5208	0	0.85289	-2.2015	0	0.21377	0.27955	3
Acp6	0.020966	0.78124	5	0.41031	-3.2026	1	0.67908	-1.6371	1	0.89234	-0.26136	0
Inpp5f	0.021001	1.2916	4	0.59718	-4.6857	0	0.09487	-1.7035	2	0.90443	-2.7106	0
Mcart1	0.021072	1.1366	5	0.98174	-7.5799	0	0.6622	-2.3727	1	0.081674	-5.262	1
Pfas	0.02108	1.0664	3	0.57603	-0.47043	0	0.97797	-5.2837	0	0.80838	-0.15181	1
Oxct2a	0.021102	0.1386	2	0.54774	-1.992	1	0.021713	1.2758	4	0.94222	-5.4252	0
Tceb2	0.021108	1.9236	4	0.35464	-6.8564	1	0.61084	-0.43057	1	0.92986	-3.2339	0
Tyk2	0.02112	0.73361	4	0.19263	-2.6552	2	0.5871	-1.0689	1	0.8883	-2.1839	0
Cyb5rl	0.021219	0.12889	3	0.65531	-4.1668	0	0.80859	-1.3997	0	0.75782	-1.2642	1
Zfp281	0.021238	-2.066	2	0.21372	-0.80319	1	0.90367	-2.6759	0	0.96478	-0.73209	0
2010011I20Rik	0.021257	1.5916	3	0.32155	-2.1514	1	0.25769	-1.2038	1	0.29302	-0.49164	2
Gmfg	0.021268	1.7469	4	0.45607	-2.154	1	0.22395	0.098555	2	0.18779	-0.18144	2
Apol10b	0.02129	0.45935	4	0.9138	-2.6373	0	0.28217	-0.091142	3	0.92344	-1.1696	0
Ccdc149	0.021476	0.7262	5	0.52464	-3.2003	1	0.83993	-1.9837	0	0.15993	0.45476	4
Lsmem1	0.021507	1.5971	3	0.89745	-3.3968	0	0.40203	-0.29939	1	0.3858	-0.14021	2
Il17f	0.021567	0.73587	5	0.41545	-2.2096	1	0.7353	-1.2417	1	0.80289	-2.4141	1
Stat2	0.021692	1.2722	5	0.48627	-1.8952	1	0.44417	-1.4365	2	0.74212	-2.8696	1
Cox18	0.021729	-1.298	2	0.84021	-5.2427	0	0.44511	-1.0093	2	0.44942	-0.81945	2
Bcmo1	0.021829	1.4844	4	0.10513	-2.0279	2	0.37662	-2.2284	2	0.39328	0.095181	3
Vmn2r101	0.021838	1.882	3	0.52923	-7.2298	1	0.78942	-1.6944	0	0.74043	-0.926	1
Arhgap12	0.021924	1.097	5	0.55353	-0.63356	1	0.11868	0.14291	3	0.96372	-1.6583	0
Cyp2t4	0.021941	-0.84505	2	0.73665	-1.6809	0	0.36442	-0.7664	2	0.39084	-1.6309	2
B430306N03Rik	0.022066	1.1373	4	0.72545	-0.43073	0	0.63697	-1.4855	1	0.64392	-2.3175	1
2210404O09Rik	0.022149	1.3449	4	0.077435	-1.6642	3	0.54731	-1.9424	2	0.4966	-0.17372	2
Ldlr	0.022193	0.65338	5	0.12673	-1.4345	1	0.80401	-0.71339	0	0.82446	-1.1746	1
Lrrc69	0.022238	1.289	4	0.79563	-1.1853	0	0.834	-3.8152	0	0.034967	-0.69633	2
Gnrhr	0.022335	0.54128	5	0.28461	-0.64108	1	0.60033	-2.0594	1	0.36176	-0.22137	3
Tmem128	0.022379	-2.4395	1	0.78767	-3.9877	0	0.036065	-0.84876	1	0.94986	-2.7224	0
Susd4	0.022393	0.84823	5	0.54764	-1.621	1	0.65915	-3.179	1	0.70828	-0.43184	1
Hcn3	0.022445	0.60384	5	0.58835	-4.569	1	0.24646	-0.3581	1	0.28342	-3.9296	1
Ryk	0.022459	0.44844	5	0.029163	-0.32249	2	0.55561	-1.0547	1	0.41056	-1.7548	1
Zfp112	0.022519	1.3224	4	0.72951	-3.8794	0	0.67814	-1.5786	1	0.56282	-1.715	2
Gdpd3	0.0226	0.79253	5	0.54219	-0.73941	1	0.2994	-0.23747	1	0.38357	-1.4553	1
Smug1	0.022626	-3.4323	2	0.094281	-0.47509	1	0.076065	0.96017	3	0.066558	1.0146	3
Fabp3	0.022651	0.15671	1	0.55118	-0.73416	0	0.57617	-1.3965	0	0.98989	-2.699	0
Dpm3	0.022652	-0.31781	2	0.13129	0.25972	2	0.84213	-3.8229	0	0.076523	0.90443	3
Cyr61	0.02268	-0.96291	3	0.53479	-1.3117	1	0.53779	-2.4817	2	0.76029	-2.4117	1
Snrpb2	0.022713	-0.46947	2	0.96673	-7.4213	0	0.14535	-1.1192	2	0.8687	-1.3345	0
B230118H07Rik	0.022744	1.3032	4	0.29603	-3.3379	2	0.87084	-1.4884	0	0.96642	-1.9508	0
C130039O16Rik	0.022754	0.89486	5	0.98272	-6.5948	0	0.45971	-2.5811	1	0.76056	-1.3411	1
Fign	0.022866	1.4106	4	0.78006	-3.0116	0	0.67129	-3.6669	1	0.6326	-0.56972	2
Gatad2b	0.022871	0.57937	3	0.9113	-4.0559	0	0.38845	-1.4937	2	0.22922	-1.6956	3
Xkr5	0.022874	1.3036	5	0.71072	-4.5508	0	0.74622	-1.8207	0	0.13217	0.92222	3
Zdhhc9	0.023011	-0.093007	2	0.60866	-1.4583	0	0.98648	-3.8164	0	0.97554	-3.4948	0
Cd226	0.023025	1.0427	5	0.806	-2.5521	0	0.75484	-2.1526	1	0.92569	-0.63277	0
Chst8	0.023176	1.2581	4	0.34764	-2.1217	1	0.53499	-3.706	2	0.032071	0.92065	5
Mst1	0.023284	0.52259	5	0.85796	-1.426	0	0.65548	-2.1847	1	0.49293	-1.2742	2
Tbk1	0.023316	0.99977	5	0.27426	-1.9297	2	0.53956	-0.1748	2	0.7047	-1.814	1
Emilin2	0.023334	-0.73368	2	0.82408	-2.0364	0	0.88354	-2.5354	0	0.013781	0.74679	4
Rgl1	0.023383	0.34667	3	0.36175	-0.77661	1	0.24509	-1.524	1	0.7219	-2.3123	1
Zfp446	0.023516	1.0956	4	0.76679	-2.2006	0	0.0895	0.75443	3	0.45446	-1.9998	2
Fbxo3	0.023535	1.2317	4	0.692	-0.66664	0	0.43288	-1.244	2	0.4446	-0.41726	2
Ube2l6	0.02358	-0.039533	2	0.62756	-3.8603	0	0.00090138	1.0292	5	0.97419	-1.3955	0
Rnf144b	0.023601	-0.69329	2	0.21632	-1.8899	1	0.28278	-1.3485	1	0.020524	1.0254	4
4932429P05Rik	0.023717	1.2287	4	0.5889	-1.8256	0	0.028748	-5.0663	1	0.091772	-1.4798	3
Fnta	0.023751	1.143	4	0.82359	-5.6807	0	0.8074	-3.8457	0	0.96743	-3.2953	0
Zdhhc15	0.023768	1.3397	4	0.4468	-3.4743	1	0.86903	-1.8313	0	0.14869	-0.51367	3
Tmprss15	0.023931	0.77569	4	0.46893	-1.3118	1	0.53988	-2.1522	1	0.57673	-0.36182	2
Gna15	0.024046	1.1021	4	0.32587	-2.4306	1	0.27065	-2.186	1	0.56112	0.054807	2
Sfxn5	0.024047	1.0864	4	0.69392	-7.172	0	0.37838	-1.0369	1	0.11887	-0.28236	2
Snrnp40	0.024058	1.0413	4	0.99294	-7.3954	0	0.29087	-0.94823	2	0.19914	0.45087	3
Fam129b	0.0241	1.2775	3	0.61895	-2.6884	0	0.46902	-4.1869	2	0.28204	0.31415	3
Snrpd1	0.024171	1.5906	3	0.86528	-7.2659	0	0.3363	-0.96432	2	0.98505	-6.8433	0
Tgoln1	0.024234	-0.92168	2	0.77929	-3.1078	0	0.71623	-2.6334	1	0.15509	-0.062642	3
Sh3gl1	0.024296	0.98586	4	0.76246	-2.0826	0	0.67737	-0.3303	1	0.021465	1.3847	4
Eif4a3	0.024325	1.529	1	0.74923	-7.2694	0	0.51553	-0.89617	0	0.41947	-0.46589	1
Lmbr1	0.02433	0.012945	2	0.59602	-2.3682	0	0.94123	-3.6031	0	0.016152	0.82901	3
2610034B18Rik	0.02436	1.5064	4	0.07905	-1.0229	2	0.6772	-2.9955	1	0.2709	-0.69002	2
Dcc	0.024403	1.0607	3	0.39846	-0.11185	1	0.18778	-2.1706	1	0.70934	-1.553	1
Tpm3	0.024454	-1.6036	1	0.13827	-4.6977	1	0.89255	-3.9524	0	0.96879	-4.7138	0
1810043G02Rik	0.024484	-1.473	1	0.26426	-0.93802	1	0.29872	-0.92685	1	0.58577	-0.50264	1
Frzb	0.024526	1.1371	4	0.22346	-1.3351	2	0.19478	-2.2248	2	0.73485	-3.3283	1
Ctla2b	0.024668	0.99035	2	0.22167	-0.64401	1	0.45103	-4.2552	1	0.64273	-0.59622	1
Cdipt	0.024773	0.67471	4	0.15787	-1.867	2	0.13669	-0.4044	2	0.043456	-0.23267	3
Gatm	0.024832	0.88951	4	0.14226	-0.03408	2	0.53683	-1.5502	2	0.39599	0.03509	3
Spsb2	0.024995	1.1189	4	0.5442	-1.5233	0	0.50986	-1.0038	1	0.38457	-0.25161	2
Hdac5	0.025004	-0.029637	2	0.56049	-2.9066	0	0.054413	-1.5988	1	0.03098	1.1826	3
Mettl16	0.02506	1.3762	3	0.83549	-7.6293	0	0.78048	-1.2604	0	0.98737	-5.4303	0
Zfp947	0.025068	1.024	4	0.90229	-5.5654	0	0.79125	-1.3418	1	0.94777	-2.4667	0
Casp7	0.025116	1.2114	4	0.63063	-6.7277	0	0.36066	-3.3004	1	0.94664	-3.7997	0
Tyw5	0.025121	1.2466	4	0.4157	-2.2102	1	0.87267	-3.9745	0	0.81849	-0.51483	1
Disp1	0.025206	0.46433	3	0.79741	-2.253	0	0.69228	-2.633	1	0.46453	-2.1035	2
Mrps24	0.025218	1.4638	3	0.92188	-7.1872	0	0.12212	-0.086724	2	0.83798	-0.81442	0
Pak3	0.025351	-1.4658	2	0.044588	0.36577	3	0.58226	-0.86018	1	0.25398	-0.95747	2
Plcb2	0.025428	1.339	3	0.72727	-3.7039	0	0.41625	-4.594	1	0.038421	0.86274	3
Gsk3b	0.025437	0.34935	3	0.2063	-0.66062	2	0.16126	0.070421	3	0.7088	-0.42693	1
Gm12794	0.025439	-1.2533	2	0.37999	-2.0403	1	0.15119	-2.7835	1	0.70321	-2.2715	1
Tysnd1	0.025441	1.48	3	0.91575	-5.2931	0	0.58952	-1.4709	1	0.86061	-4.7944	0
Zyg11a	0.025658	0.62467	3	0.76381	-7.4045	0	0.31778	-1.3553	2	0.20248	-0.40036	3
Palm2	0.025737	0.88535	4	0.21008	-0.2724	2	0.9322	-1.6501	0	0.45272	-0.92287	2
Nup85	0.02576	1.2768	2	0.89456	-5.6439	0	0.77433	-1.7672	0	0.22181	0.61063	2
Slc32a1	0.025827	1.0741	4	0.37767	-0.77046	1	0.67534	-2.3757	1	0.72332	-0.96497	1
Pknox1	0.025905	1.4063	2	0.95228	-8.1299	0	0.38498	-1.3205	1	0.36726	-1.6744	1
Ssb	0.025976	1.1755	4	0.4529	-2.0548	1	0.058476	0.78718	4	0.1112	-0.83536	2
Gm410	0.025981	-0.064077	2	0.48023	-7.2371	1	0.25047	-0.76552	2	0.49464	-0.46918	2
Cwc25	0.026049	1.5448	3	0.77674	-1.9092	0	0.14093	-0.54337	2	0.77845	-0.40253	1
Cnpy2	0.026066	-2.093	2	0.4855	-3.1001	1	0.38053	-2.0822	1	0.28389	-0.285	2
Bet1l	0.026114	0.73483	5	0.0024974	0.78006	3	0.24664	-2.095	1	0.26586	0.29917	3
Vmn2r102	0.026187	1.1123	4	0.32548	-3.6247	2	0.19901	-1.0962	2	0.64642	-1.768	2
Coq4	0.026196	0.88474	4	0.14746	-0.6849	2	0.17866	0.34416	3	0.49787	-2.0434	2
Mepce	0.026233	1.6534	3	0.72143	-7.3931	0	0.81655	-3.3296	0	0.40888	0.34805	1
Cyp27a1	0.026235	1.0239	4	0.42274	-0.62191	1	0.57896	-2.5482	1	0.39936	-0.061372	2
Erp44	0.026267	-0.65415	3	0.20982	-3.0244	2	0.5976	-2.7813	1	0.845	-3.4588	1
Plbd2	0.026341	-0.86672	2	0.2827	-4.5927	1	0.33125	-3.3694	1	0.49472	-1.6559	2
Gm11595	0.026402	-0.30287	2	0.99742	-8.1887	0	0.94419	-2.4623	0	0.66674	-2.4831	1
Plcb4	0.02645	0.74456	4	0.20811	-1.1823	1	0.20159	0.24208	2	0.80332	-0.7136	1
Zfpm2	0.026492	1.3142	3	0.64874	-1.3051	0	0.91577	-4.4611	0	0.34183	0.36304	2
Cytip	0.026601	0.87594	2	0.35858	-0.79084	1	0.4632	-1.7374	1	0.95185	-4.2073	0
Psma1	0.026885	1.1423	5	0.9876	-6.7758	0	0.50376	-0.17761	2	0.28494	0.20894	3
Ebp	0.02691	1.1299	4	0.42329	-1.3412	1	0.41044	-1.8911	2	0.80369	-1.2972	1
Tll1	0.026924	-0.41378	3	0.0087552	-3.5534	1	0.24797	-0.79184	2	0.085893	-1.4342	2
Ddx42	0.026931	0.87039	4	0.14828	-4.0588	2	0.62154	-1.2828	1	0.20061	-0.14104	2
Son	0.026968	0.094781	2	0.06103	-4.2025	1	0.21982	0.53953	2	0.91412	-7.5317	0
Asf1a	0.026993	1.4102	4	0.3134	-0.75112	2	0.99422	-6.0137	0	0.19374	-2.0407	3
Plekha8	0.027029	-0.21119	2	0.50744	-2.6677	1	0.041095	-5.3738	1	0.011975	0.53939	3
Bbs9	0.027037	0.49722	3	0.76433	-1.1575	0	0.76331	-1.6176	1	0.85413	-3.8432	1
E130311K13Rik	0.027069	0.84009	5	0.80085	-4.1707	0	0.92319	-4.6711	0	0.82487	-0.45449	1
Hrct1	0.0271	1.3854	4	0.095548	-0.73052	2	0.85288	-0.99684	0	0.67103	-3.7415	1
Phyhip	0.027117	1.2036	4	0.43027	-2.0448	1	0.44917	-1.5902	1	0.16854	0.30986	4
Prdm10	0.027149	-0.41344	3	0.85189	-2.4244	0	0.42936	-1.6972	2	0.91968	-0.98512	0
0610037L13Rik	0.027195	1.4822	4	0.95822	-7.026	0	0.82529	-2.9318	0	0.49929	-1.82	1
Angptl7	0.027336	-1.635	2	0.043312	0.5744	2	0.47167	-2.7548	2	0.52078	0.1044	1
Mmp9	0.027378	0.75798	3	0.37253	-2.1897	1	0.46296	-1.8582	1	0.75086	-1.02	1
Ccl27a	0.027444	2.6264	1	0.64174	-7.4019	0	0.10567	1.8426	1	0.52386	-1.4002	0
CTRLHS_57610	0.027481	1.9306	1	0.32538	-0.62343	0	0.98226	-4.2491	0	0.14379	0.80227	1
Adamts1	0.027491	1.5074	3	0.24384	-0.012112	2	0.16264	0.082487	2	0.66498	-0.72093	1
Rad51ap1	0.027492	0.86313	5	0.8018	-5.7237	0	0.7928	-2.8637	1	0.87313	-1.186	0
Ccdc45	0.02758	-0.23303	1	0.54949	-0.9434	1	0.29152	-2.7752	1	0.87526	-5.4052	0
Minpp1	0.027862	-2.2985	2	0.63272	-4.7711	0	0.90893	-3.6396	0	0.78572	-0.95825	1
Psma3	0.02797	1.2473	5	0.19137	-7.1413	1	0.051652	-0.31952	2	0.77141	-0.93121	1
Stip1	0.028249	0.83822	3	0.022803	0.29589	3	0.33773	-1.267	1	0.0037984	-0.20729	3
Zfp54	0.028292	-1.1333	2	0.90736	-3.0746	0	0.99062	-5.7568	0	0.11762	0.41144	3
BC005624	0.028439	1.3475	4	0.60841	-1.473	1	0.69145	-1.294	1	0.052613	0.9397	4
Nipbl	0.028524	0.95313	4	0.92727	-3.8237	0	0.57604	-1.9578	1	0.56255	-0.94744	2
Slc25a41	0.028559	-0.1765	2	0.51218	-2.877	1	0.3285	0.052002	2	0.90971	-1.3687	0
Reep6	0.028573	0.83512	4	0.61068	-1.8659	0	0.49707	-3.8449	1	0.69576	-0.70112	1
Hist1h1e	0.028668	-1.6675	1	0.49477	-2.386	0	0.89342	-5.5025	0	0.91394	-2.2246	0
Irf3	0.028727	1.1026	4	0.41016	-5.6186	1	0.49552	-1.4499	2	0.18889	0.049978	2
Prpf31	0.02874	1.1245	4	0.98283	-7.8067	0	0.4091	-1.2767	2	0.4426	-7.9632	1
Lrriq4	0.028819	0.7305	5	0.22592	-0.47778	2	0.53469	-4.9521	2	0.71465	-0.3727	1
AU019823	0.0289	0.19781	3	0.91473	-7.5765	0	0.73773	-1.5283	1	0.0028083	1.8984	4
Ubn2	0.028929	0.84416	5	0.87996	-5.4251	0	0.19607	-0.74829	3	0.11178	-0.30353	3
Neurod1	0.029107	0.45777	2	0.85076	-4.7751	0	0.040577	1.9311	2	0.35054	-2.3418	1
Kbtbd2	0.029122	1.2049	4	0.7632	-1.6389	0	0.90096	-0.97637	0	0.21898	0.35284	3
Atm	0.029174	0.96417	4	0.12277	-1.0775	2	0.1613	-2.4611	2	0.44422	0.021494	2
Prrt4	0.029198	0.49335	3	0.31901	-1.0457	1	0.14886	0.6521	3	0.41403	-3.6262	2
Gtpbp4	0.029251	-2.1833	2	0.66797	-2.2366	0	0.89091	-4.5273	0	0.77397	-2.7891	0
Uso1	0.029304	1.1868	4	0.52425	-7.3092	1	0.59391	-1.7645	1	0.85372	-0.58594	1
Gtf2a1	0.029309	1.105	5	0.45366	-3.5329	1	0.40159	-1.4048	1	0.50597	-0.46567	2
Chchd3	0.029386	0.81743	5	0.23491	-0.62919	2	0.14318	-1.5386	2	0.3513	-0.036139	2
Syn2	0.029496	0.47777	5	0.362	-4.2993	1	0.3703	-1.7031	2	0.0079178	1.0559	4
6030468B19Rik	0.029547	0.77672	4	0.084002	-2.3866	3	0.44044	-0.73817	2	0.24061	-0.35223	3
B3gnt3	0.029567	-1.8873	2	0.67978	-2.5371	0	0.72229	-2.1872	1	0.15046	-1.8858	2
Rasa1	0.029578	0.79311	3	0.49732	-1.0224	1	0.054838	-3.0911	1	0.98724	-3.1783	0
4930564D02Rik	0.029612	0.92052	5	0.20639	-2.8808	2	0.14973	0.36532	3	0.13011	0.6633	4
Sepsecs	0.029657	2.0279	2	0.86528	-6.7914	0	0.89465	-6.995	0	0.68277	-6.0041	0
Prm2	0.02966	0.64411	3	0.22917	0.21197	2	0.31596	-2.4488	1	0.62461	-2.1742	2
Zfp799	0.029678	1.5668	3	0.15576	-1.8514	1	0.96249	-4.4319	0	0.49977	-0.29099	1
H2-T24	0.029743	-4.124	2	0.056927	-7.6134	2	0.22462	-0.85332	2	0.45599	-1.4497	1
Garnl3	0.029762	1.2412	4	0.76412	-3.3964	0	0.88125	-3.0572	0	0.78524	-2.3048	1
Naip5	0.029814	-2.7429	1	0.15045	-4.9951	2	0.8675	-3.2521	0	0.86483	-0.63566	1
Chga	0.029836	1.5283	3	0.19225	-0.31423	1	0.071445	-0.50687	2	0.35905	-1.828	2
Mettl22	0.02993	1.2999	4	0.19217	-0.72514	1	0.69888	-7.5794	1	0.98885	-3.8829	0
Usf2	0.029981	1.3431	4	0.128	-0.51078	2	0.80343	-2.309	0	0.33212	0.1115	3
Mta2	0.030014	-1.0212	2	0.9522	-4.4529	0	0.49988	-0.086733	1	0.40829	-0.76676	2
Adarb2	0.030063	1.31	4	0.87528	-6.9308	0	0.3257	-0.70387	2	0.12003	0.8038	4
Abcc4	0.030102	0.17593	3	0.88516	-5.4997	0	0.81323	-1.2762	0	0.3915	-2.2598	2
Uspl1	0.030239	-0.44069	2	0.75314	-7.1625	0	0.22069	-0.95425	2	0.39777	-2.1813	2
H60b	0.030275	-1.2848	2	0.0032913	-4.4461	1	0.15243	-0.62061	3	0.11659	-4.0063	1
Nrde2	0.030298	1.1347	4	0.3392	-2.2395	1	0.99595	-3.4359	0	0.47285	-0.6627	2
1700029H14Rik	0.030312	1.2356	4	0.0096698	0.55423	4	0.59074	-3.7506	1	0.19273	0.25258	3
Hmbs	0.030354	1.2368	4	0.81037	-2.9583	0	0.83026	-2.7844	0	0.81898	-2.431	1
Smcp	0.030364	1.0028	4	0.0062068	-2.6529	1	0.23246	-0.25901	3	0.99774	-2.6519	0
Anks6	0.03049	-0.086638	2	0.64773	-3.9118	0	0.65463	-1.617	1	0.84099	-0.81405	1
Pknox2	0.030549	0.84819	4	0.06337	0.20612	3	0.084286	0.77686	3	0.14011	0.65678	3
Gm14354	0.030578	0.79514	3	0.92073	-7.4778	0	0.21575	0.37466	2	0.48864	-2.3937	1
Bcar3	0.030599	-3.6052	2	0.40272	-4.7343	1	0.67655	-1.9945	1	0.20732	-0.44231	3
CTRLHS_57626	0.03064	2.4194	1	0.56255	-3.4651	0	0.4652	-1.9028	0	0.24168	0.55613	1
Cav1	0.030667	-0.26881	2	0.36874	-0.66964	1	0.72747	-2.9453	1	0.25032	0.5099	3
Swi5	0.030721	-2.693	2	0.80149	-1.7583	0	0.4817	-1.9413	1	0.88786	-1.9332	0
Clptm1	0.030785	1.0541	5	0.43927	-4.0354	1	0.87163	-5.3043	0	0.82348	-2.5602	1
Coq10a	0.030824	-2.4432	2	0.52435	-2.216	1	0.94076	-2.2686	0	0.259	0.34836	3
Btaf1	0.030847	-0.10844	3	0.56036	-7.8544	1	0.42112	-1.2924	2	0.62172	-0.21175	2
Ldlrap1	0.03085	0.68271	4	0.29945	-5.1089	1	0.84796	-6.4232	0	0.37435	-1.9745	2
Commd2	0.030883	1.2097	4	0.42628	-2.732	1	0.73759	-2.224	1	0.95461	-1.8327	0
Guca2a	0.030884	1.6769	2	0.29582	-2.5988	1	0.05047	1.4265	2	0.56729	-0.17333	1
1700067K01Rik	0.030908	1.2498	4	0.17126	0.18202	2	0.96379	-6.1753	0	0.061772	-0.050903	3
Dkk3	0.03091	1.4121	4	0.11271	-4.69	2	0.30434	-6.2026	1	0.74778	-0.47644	1
Pnp	0.030918	1.4669	2	0.16688	0.070157	1	0.20831	0.19079	2	0.91139	-2.5344	0
Gprin2	0.030934	-1.4044	2	0.37537	-2.1611	1	0.36359	-0.99684	2	0.4789	-4.4966	2
Slc38a7	0.030947	0.92322	4	0.29504	-2.4698	1	0.82692	-3.5594	0	0.24439	-0.85867	2
Gpr161	0.030954	1.0314	4	0.46936	-2.2347	1	0.82668	-2.5335	0	0.52641	-1.1401	1
Vmn2r67	0.031074	2.0288	2	0.53937	-1.0804	0	0.78512	-3.8911	0	0.78135	-2.0636	0
Slc17a9	0.031126	-0.33559	2	0.50842	-3.4724	1	0.071358	-2.2544	2	0.10497	-0.49061	1
Cdk2ap2	0.03116	-1.3053	3	0.71053	-2.3819	0	0.93596	-5.8176	0	0.46294	0.1098	2
Vprbp	0.03116	0.93653	4	0.0096061	-0.5304	1	0.0084068	1.2271	4	0.92532	-1.6925	0
Gpr141	0.031241	1.2503	3	0.68526	-2.1025	0	0.80162	-1.6345	0	0.92944	-0.7789	0
Ifna11	0.031353	1.1576	5	0.88368	-3.1667	0	0.015499	1.5506	4	0.84488	-0.22947	1
Gm12789	0.031418	2.0638	2	0.55459	-4.1728	0	0.075158	1.5044	2	0.76064	-0.39383	0
Atp6v0a1	0.03147	0.46434	3	0.30126	-0.43691	1	0.23218	-2.1882	1	0.7135	-0.27952	1
Wnt3	0.031489	-1.1742	1	0.11096	-7.5699	1	0.36548	-2.772	1	0.73565	-0.95838	0
Chad	0.031536	-0.13344	2	0.30873	-2.2579	1	0.68469	-3.4888	1	0.51378	-1.0983	2
Vmn1r198	0.031571	-4.0114	2	0.89818	-1.5852	0	0.81589	-2.2605	0	0.18183	0.42751	3
Rsph4a	0.031594	-2.4077	1	0.83152	-1.4937	0	0.012004	0.63235	5	0.05575	0.078908	2
4930415L06Rik	0.031621	0.58971	5	0.77531	-3.7633	0	0.48257	-1.9021	2	0.89758	-1.7283	0
Pcsk9	0.03165	-0.22905	2	0.90758	-2.1941	0	0.58642	-2.5223	1	0.11513	0.56162	3
Cdsn	0.031679	1.3317	3	0.065851	-0.96593	2	0.95062	-5.3756	0	0.49575	-1.5596	1
Mapk10	0.031768	0.61651	5	0.15574	-0.037869	2	0.27234	-0.40531	1	0.47369	-0.62631	2
Syt6	0.03178	0.79712	5	0.39268	-2.1276	1	0.43604	-3.6617	2	0.29145	-0.95225	2
Cnn1	0.03189	0.92616	3	0.87835	-3.4543	0	0.72475	-1.3793	1	0.004832	-0.82927	1
Gadd45gip1	0.032001	0.80517	4	0.023158	0.51725	3	0.98249	-4.8026	0	0.25166	0.35836	3
Mtap2	0.032018	-1.3078	2	0.19305	-2.4085	2	0.62872	-3.97	1	0.60742	-0.40028	2
Prkg1	0.032119	1.8759	3	0.61635	-3.7427	0	0.55971	-2.1403	1	0.10174	0.10643	2
Uba2	0.032309	0.51577	4	0.32694	-1.2569	1	0.56343	-0.86977	1	0.52042	-0.20793	2
Itpkc	0.032322	0.63568	4	0.77125	-3.4752	0	0.29455	-5.7692	1	0.028228	1.3369	3
Prss33	0.032385	-0.46292	2	0.10671	-1.2213	1	0.28326	-4.2078	2	0.9486	-1.2369	0
Car1	0.032435	0.60313	3	0.90158	-2.8635	0	0.4078	-0.66446	1	0.0050271	0.89857	5
CTRLHS_57401	0.032454	2.4708	1	0.35416	-1.6415	0	0.11568	1.6715	1	0.19884	0.84609	1
Rapgef6	0.032476	1.1402	4	0.86355	-1.5864	0	0.0045219	-1.9619	1	0.23434	-0.53636	2
Ppp1r37	0.03264	-0.72383	1	0.37632	-0.31177	1	0.0092531	0.64189	3	0.27362	0.27128	3
Nr5a2	0.032661	1.0485	3	0.58209	-2.0207	0	0.32893	-2.5305	1	0.95766	-1.6515	0
Brsk1	0.032701	1.0575	4	0.08584	-2.2417	2	0.72187	-4.7272	1	0.08446	0.64841	3
Sirt2	0.032774	0.44059	5	0.70948	-1.0606	0	0.98658	-2.0818	0	0.75452	-1.3132	1
Gjc1	0.032789	0.54251	3	0.27531	-0.79575	1	0.7479	-4.0775	0	0.82389	-1.1665	0
Vrk1	0.032799	0.86439	4	0.52023	-1.26	1	0.36253	-0.28831	2	0.35066	-0.87522	2
Lipc	0.032871	-5.6666	1	0.91544	-2.4234	0	0.67043	-1.18	1	0.60026	-1.7007	1
Ecm2	0.0329	1.2814	4	0.082821	-2.1511	2	0.60933	-1.6742	1	0.61979	-0.97514	1
Art2b	0.032906	0.40355	5	0.73272	-6.5745	0	0.86771	-5.2865	0	0.3652	-0.55559	2
Sptlc1	0.032921	0.35796	5	0.28979	-0.97262	2	0.081067	-0.4648	2	0.2353	-0.044744	3
Gatc	0.033188	-0.13938	2	0.8404	-6.7885	0	0.59209	-3.4354	1	0.65924	-2.0297	1
Dolk	0.033446	0.80802	4	0.054068	0.058147	3	0.13703	0.18649	3	0.92553	-0.66081	0
Slc5a1	0.033459	0.142	2	0.48074	-0.013804	1	0.31675	-5.0625	1	0.38803	-0.79265	2
Ldoc1	0.033464	1.039	4	0.089706	-3.0891	2	0.3078	-3.721	1	0.54212	-0.76355	2
Smo	0.033482	0.69948	4	0.37549	-0.76471	1	0.33776	-1.1986	2	0.11177	0.56609	4
Fuca2	0.033492	-0.94986	1	0.055778	-0.83734	3	0.54011	-2.3488	1	0.90463	-1.5287	0
0610011F06Rik	0.033533	1.559	3	0.66609	-1.6403	0	0.5347	-2.4893	1	0.83719	-1.0846	0
Vmn1r47	0.033641	-1.3483	1	0.33597	-1.5288	1	0.36288	-1.4115	1	0.68541	-5.955	1
Id2	0.033641	0.24497	3	0.24272	-4.2552	1	0.87788	-1.3682	0	0.9144	-3.4632	0
Zdhhc22	0.033678	-1.2677	1	0.4981	-1.2641	1	0.081473	0.30616	4	0.92018	-1.6298	0
Scaf8	0.033685	1.2523	4	0.48561	-1.1172	1	0.35076	-5.4604	1	0.27247	-0.06445	2
Pcgf5	0.03382	-0.32369	2	0.65119	-4.5645	0	0.81884	-1.6894	0	0.033755	0.45669	2
Adcy4	0.033851	0.45524	3	0.0088997	-3.6249	1	0.66301	-5.2771	1	0.039524	1.2525	3
Dip2c	0.033875	1.1718	4	0.32337	-4.0128	1	0.085015	-0.040448	2	0.54116	-0.53983	1
Hsd17b13	0.033942	0.90962	4	0.74775	-1.6438	0	0.0091144	0.37416	3	0.84583	-0.49285	0
Prrg3	0.03412	0.29616	3	0.064223	0.2127	3	0.59676	-2.5628	1	0.54261	-0.2265	1
Zfp771	0.034173	1.1659	3	0.37673	-4.2938	1	0.46969	-5.1186	1	0.88983	-2.2842	0
Mmd2	0.034176	1.6281	3	0.653	-0.70715	0	0.7674	-2.3831	0	0.54346	-0.87154	2
Clec4a3	0.034178	0.62731	4	0.38043	-4.2571	1	0.25252	-1.4886	3	0.45466	0.010723	2
Fgf10	0.034181	-0.34534	1	0.7983	-3.9169	0	0.99121	-5.1739	0	0.8223	-1.0353	0
Lrrtm3	0.034202	0.74795	3	0.96189	-3.8752	0	0.6924	-4.6658	1	0.62082	-1.6179	1
Nexn	0.034254	1.2446	4	0.37602	-0.99762	1	0.22482	-0.040231	3	0.91834	-4.2092	0
Clec12a	0.034422	-0.03047	3	0.84412	-5.5735	0	0.56581	-1.7988	1	0.47524	-0.86933	2
Adcy5	0.034481	0.93756	4	0.6144	-4.3973	0	0.86127	-3.4704	0	0.3088	-0.12268	2
Slc9a2	0.034499	0.21647	3	0.083236	-1.0913	2	0.098202	-0.84533	2	0.96672	-0.94309	0
Ugt1a6a	0.034511	-0.32089	3	0.62056	-0.93969	1	0.1998	-0.27244	2	0.27947	0.36832	3
Srrm4	0.034592	0.45175	3	0.5292	-5.0524	1	0.39339	-0.95268	2	0.53408	-0.61932	2
Zfp943	0.034598	1.02	3	0.11981	-1.3544	2	0.70884	-1.2864	1	0.35858	-2.9015	1
Bbs12	0.034833	-0.042844	3	0.05288	-0.85483	2	0.97738	-5.3681	0	0.35145	-2.2284	1
Zc3h13	0.034875	-1.8938	2	0.093479	-2.7241	2	0.20111	-0.30085	3	0.25931	-1.5816	3
Ptx3	0.034972	0.68114	4	0.67091	-3.9797	0	0.092715	-0.60128	2	0.23161	-0.21017	2
Pnkd	0.035006	-4.0007	1	0.13186	-1.5961	1	0.48296	-3.7925	1	0.44668	-0.97993	1
Fem1c	0.035018	1.624	3	0.35225	-4.859	1	0.25737	-2.1355	2	0.090019	-0.04013	2
Nr1d1	0.035054	-0.74253	2	0.74038	-7.8038	0	0.69696	-2.6498	1	0.25756	-0.37613	2
Ppid	0.035156	0.7394	3	0.81576	-4.3942	0	0.015182	0.60702	3	0.20522	-1.2589	3
Ints12	0.035157	-0.26563	2	0.46605	-2.6308	1	0.59643	-4.7238	1	0.085005	0.7103	4
CTRLHS_57446	0.03529	1.7973	1	0.80872	-1.8813	0	0.97847	-3.7629	0	0.19164	0.5707	1
St6galnac3	0.035334	-0.40511	2	0.5349	-0.98072	1	0.65589	-3.7362	1	0.31789	0.15383	3
Scn7a	0.03536	0.73805	3	0.59864	-2.2738	0	0.65238	-3.8367	1	0.22294	-0.92245	1
Lcn6	0.035426	1.4362	4	0.86509	-5.2525	0	0.74223	-1.3823	1	0.30734	0.026942	3
Thrap3	0.035441	1.1564	4	0.059545	-1.3973	2	0.19767	-0.51783	2	0.1928	0.37115	3
Cngb1	0.035554	-1.7333	2	0.85905	-2.1563	0	0.60698	-2.0615	1	0.088819	-0.16896	3
Rbm5	0.035556	-1.8861	3	0.54604	-5.3606	1	0.44822	-1.7951	1	0.78037	-1.6599	1
Mrps27	0.035671	0.58651	3	0.99386	-7.7801	0	0.50757	-1.1732	2	0.59145	0.11331	2
Rbmx2	0.035803	1.4752	3	0.073167	-7.4963	1	0.84245	-1.7526	0	0.97334	-2.3971	0
Scube1	0.035834	-0.85915	2	0.14974	-1.9687	1	0.26592	-1.2021	2	0.42655	0.01625	2
Gm11744	0.035977	0.94193	3	0.93238	-5.4958	0	0.91002	-3.4841	0	0.92614	-2.3972	0
CTRLHS_57569	0.036013	1.8941	1	0.048901	1.062	1	0.33389	-0.3883	0	0.048655	1.6029	1
Ublcp1	0.03602	1.3003	3	0.69838	-0.64745	0	0.64632	-1.0351	1	0.5396	-0.32497	2
Efha2	0.036081	-0.21299	3	0.79795	-1.2459	0	0.57758	-1.8464	1	0.31148	-2.1954	1
Uqcrb	0.036112	1.1467	2	0.84618	-3.5536	0	0.41028	-4.2948	1	0.57706	-4.2712	1
Ap1ar	0.036164	0.40007	3	0.80681	-2.1509	0	0.1541	-0.40679	3	0.81289	-2.6378	1
Serbp1	0.036172	-0.51935	3	0.85005	-7.3087	0	0.31974	-3.2048	2	0.6682	-0.43183	2
9530077C05Rik	0.03625	-0.33771	2	0.23384	-0.02052	2	0.59353	-3.1515	1	0.60813	-0.67977	1
Pspc1	0.036299	0.53793	3	0.77452	-2.9265	0	0.36048	-3.5442	1	0.42943	-1.1413	2
Tmem38b	0.036363	1.0794	4	0.92332	-1.9246	0	0.95809	-3.5459	0	0.077126	0.17933	3
Usp5	0.03637	0.97228	4	0.11824	-1.827	1	0.065247	0.64058	4	0.42818	-0.10464	1
Cpn1	0.036412	-0.28837	2	0.37327	-1.3122	1	0.37996	-0.61471	2	0.73393	-0.82455	1
Ip6k2	0.036536	0.49628	4	0.67921	-0.90476	0	0.90775	-4.284	0	0.32701	-0.23032	3
Bhmt	0.036574	1.007	4	0.7894	-1.1804	0	0.15386	-0.42916	2	0.64103	-0.46354	1
Rtp3	0.036618	-0.19027	3	0.66544	-2.9899	0	0.6504	-1.4844	1	0.94538	-0.98887	0
Cisd1	0.036721	-1.9844	2	0.017685	-2.0765	1	0.2387	0.03289	2	0.86521	-6.7253	0
Abca1	0.036739	0.82953	4	0.76278	-1.462	0	0.051261	-0.090965	3	0.32684	-1.0181	3
Sh2d4b	0.03687	1.6948	3	0.87157	-4.7936	0	0.25899	-1.2039	2	0.93039	-1.8987	0
Nhp2	0.036875	-0.11825	2	0.74714	-1.8572	0	0.48083	-0.25442	1	0.84126	-7.6838	0
Hmgn5	0.036896	1.2844	3	0.99379	-3.8593	0	0.71273	-2.6377	1	0.78006	-1.1175	1
Azin2	0.036929	0.72228	4	0.33744	-4.2174	1	0.22831	-3.0764	2	0.53479	-1.7174	1
Khdrbs3	0.036943	0.036124	2	0.033336	-0.22719	3	0.51194	-0.19461	2	0.58837	0.031532	2
Cmtm2b	0.037028	0.51674	3	0.19538	-0.40979	2	0.32255	-1.4977	1	0.3156	-1.1134	2
Hint3	0.037091	0.33164	2	0.88132	-2.0415	0	0.95237	-3.8037	0	0.42051	-1.2941	1
Mapk6	0.037204	0.063069	3	0.20625	-3.5405	2	0.55731	-0.47019	2	0.82964	-1.0162	1
4931408A02Rik	0.037306	-2.3475	1	0.051882	-2.0301	1	0.84964	-2.4442	0	0.52464	-1.6977	1
Tle3	0.037349	1.1367	4	0.41626	-3.5543	1	0.52033	-1.3404	2	0.8081	-0.3855	1
CTRLMM_66890	0.037423	2.0439	1	0.94064	-8.433	0	0.18745	0.63291	1	0.42006	-0.36448	0
Psg17	0.037461	-0.29717	2	0.5191	-5.607	1	0.067511	0.77283	3	0.82347	-2.1742	0
Casp6	0.037527	0.10724	3	0.84081	-2.1014	0	0.049309	0.86587	4	0.57474	-2.1301	2
Prrx2	0.037752	-2.5286	2	0.23231	0.015736	2	0.5266	-2.6307	1	0.51498	-1.8006	1
Slc25a44	0.037842	1.1774	4	0.69424	-2.4866	0	0.63831	-3.3087	1	0.77056	-1.0905	1
Gpr37l1	0.037876	-0.41694	2	0.94006	-6.7557	0	0.14912	0.1473	3	0.8278	-1.1167	1
Shcbp1l	0.037988	0.88847	4	0.46817	-3.1889	1	0.29304	-1.8675	1	0.10348	0.55604	3
Gpr108	0.037989	0.80638	3	0.56451	-1.2251	0	0.75608	-1.4735	0	0.60837	-0.94114	1
Copb1	0.038046	-4.3755	2	0.76548	-1.2504	0	0.59596	-5.0942	1	0.67841	-1.7966	1
Zfp213	0.038046	1.2231	3	0.30824	-2.1908	1	0.62211	-2.6931	1	0.70367	-1.848	1
Ptn	0.038086	-0.5825	2	0.43088	-3.2408	1	0.053048	0.9992	3	0.98007	-2.5438	0
Nmral1	0.038103	0.54333	4	0.0168	-0.48047	2	0.528	-1.7109	1	0.99956	-3.0904	0
Grin1	0.038111	-0.27639	2	0.22753	-1.6668	1	0.51135	-1.7616	1	0.61982	-0.7903	2
Mrgprb4	0.038144	0.23607	3	0.72551	-1.9113	0	0.21896	-0.91058	2	0.81113	-0.64442	1
4933405L10Rik	0.038198	-0.22815	2	0.2577	-1.402	2	0.036403	-2.5139	2	0.66504	-1.1584	2
Efna5	0.038271	1.5258	4	0.67961	-1.8182	0	0.95402	-3.7819	0	0.081265	-0.27695	2
Kif1c	0.038283	0.49232	3	0.82207	-1.8676	0	0.87001	-3.8943	0	0.61787	-4.0994	2
Dgkh	0.038345	-3.0724	2	0.56804	-7.1069	0	0.68232	-2.1628	1	0.60493	-2.5494	1
Flrt3	0.038418	0.92071	3	0.2926	-2.5838	1	0.51825	-2.7427	1	0.56621	-1.2175	1
Mrpl35	0.038615	1.1145	4	0.37361	-1.1521	1	0.27774	-3.4646	1	0.49696	-0.72324	2
Pacsin3	0.038703	0.67327	4	0.67441	-1.811	0	0.03845	-0.44829	3	0.62952	-0.82282	1
Ppp1r7	0.038707	-1.5664	3	0.75365	-5.928	0	0.64885	-0.83472	1	0.79571	-0.74109	1
Alg13	0.038721	-0.578	2	0.94853	-5.2345	0	0.44585	-1.6596	2	0.29882	0.11822	3
Zfp110	0.038812	0.99135	4	0.2582	-1.8488	2	0.22679	-2.7662	2	0.42931	-0.52746	1
Rftn2	0.038863	-3.6176	2	0.023053	0.052647	3	0.60036	-1.5559	1	0.19354	-1.9692	2
Rims2	0.038894	0.75372	3	0.84752	-7.7312	0	0.97752	-4.8469	0	0.46979	-5.5292	1
Ifnar2	0.038965	0.92662	4	0.55216	-2.1828	1	0.61776	-2.4811	1	0.12248	-0.090957	2
Nov	0.039023	-0.72816	2	0.2221	-0.79766	2	0.073441	0.57971	4	0.55766	0.10411	2
Neu1	0.039031	1.3274	4	0.052227	-1.5153	2	0.10358	-0.28052	2	0.9107	-0.59237	0
Gm10696	0.039095	1.0361	4	0.56183	-7.3012	0	0.48315	-1.7602	1	0.41713	-5.1019	1
Wdr44	0.039178	0.83385	3	0.75948	-2.8949	0	0.19512	0.11576	3	0.69769	-1.2738	1
Mlycd	0.039383	1.0847	3	0.65843	-2.6079	0	0.31406	-0.10341	2	0.68422	-2.0528	1
Tpm2	0.039455	1.4392	3	0.94567	-7.8737	0	0.012437	-1.1022	1	0.46111	-0.58166	2
Sat1	0.039504	0.60106	4	0.48082	-0.040702	1	0.033545	0.88905	4	0.31104	0.093362	1
Ccdc8	0.039525	0.6731	4	0.53317	-2.5048	1	0.70897	-3.9763	1	0.55092	-1.7813	1
Tex19.1	0.039639	0.46493	3	0.18573	-0.11799	2	0.17337	-0.51767	2	0.93187	-3.2056	0
Fgf18	0.039726	1.9209	3	0.13115	-0.61789	2	0.60503	-3.7726	1	0.56026	-0.51875	1
Ercc8	0.039806	1.2964	3	0.17938	-2.128	2	0.10493	-0.27317	2	0.32447	-0.99543	2
Arhgap18	0.039838	-3.1142	2	0.38814	-1.2057	1	0.35818	-1.7391	1	0.085771	-1.456	2
Stxbp3a	0.039966	0.67028	3	0.81706	-5.0982	0	0.044221	0.44045	4	0.75483	-4.3095	1
Kctd21	0.04009	1.0373	4	0.78864	-3.7725	0	0.16905	-0.14786	3	0.3784	-0.15554	3
Nfia	0.040109	0.88197	4	0.14025	-0.78791	2	0.82924	-4.4991	0	0.55947	0.21664	2
Pou4f1	0.040109	-0.16708	2	0.73627	-1.907	0	0.8308	-2.3956	0	0.6269	-0.93039	1
Ythdf2	0.040133	1.1132	4	0.92685	-5.992	0	0.70093	-1.0392	1	0.052759	-1.6181	2
Mrpl19	0.04015	1.1201	4	0.1694	-1.3247	2	0.32874	-2.4118	2	0.44093	-1.9901	2
Gm13271	0.040181	0.21972	2	0.65793	-6.2459	0	0.4646	-1.9616	1	0.29377	0.37295	2
Vmn1r86	0.040208	0.0071236	2	0.17773	-1.2362	1	0.64641	-3.7119	1	0.16293	0.56463	3
Pias1	0.040325	0.48007	3	0.47624	-1.098	1	0.076872	0.2681	4	0.1284	0.20292	3
Hoga1	0.040346	-5.5465	1	0.99596	-4.6793	0	0.28653	-3.88	2	0.94158	-1.8376	0
Mfsd6	0.040476	1.0769	4	0.7896	-2.8046	0	0.88559	-2.8495	0	0.52179	-0.24887	2
Crygn	0.040516	-0.41178	2	0.69628	-5.1815	0	0.92277	-1.7236	0	0.81213	-1.3281	1
Cic	0.040537	1.8304	2	0.37084	-1.4191	1	0.93717	-7.1958	0	0.95437	-7.1849	0
Pcdhb16	0.040585	0.8252	3	0.22355	-1.9818	1	0.32868	-0.78448	2	0.9527	-2.0222	0
Sh3bgr	0.040604	-1.2835	3	0.99076	-7.7996	0	0.55883	-1.352	2	0.80049	-0.87682	1
Glt1d1	0.040644	0.61854	3	0.77662	-3.9639	0	0.99967	-6.0484	0	0.62836	-1.4831	1
Cml2	0.040692	-1.8188	2	0.67666	-2.2207	0	0.33023	-0.94173	1	0.83862	-1.5281	1
Gsk3a	0.040766	0.7209	4	0.52556	-0.23007	1	0.27308	-0.80782	2	0.020785	0.87161	4
Zfp790	0.040849	1.0004	4	0.65905	-0.3017	0	0.36438	-4.6112	1	0.56672	-0.22349	2
Mlc1	0.041015	0.028919	2	0.46491	-1.4875	1	0.1075	-0.63548	2	0.54521	-2.0475	2
Krit1	0.041083	0.98195	4	0.11978	-1.8812	2	0.62609	-1.8524	1	0.9252	-1.1531	0
CTRLMM_67391	0.041125	2.2427	1	0.75733	-5.5369	0	0.34501	-0.71324	0	0.31595	0.12895	0
Adssl1	0.041133	1.1245	4	0.29022	-1.6644	2	0.76955	-1.9314	1	0.86148	-0.88776	1
Krt19	0.041177	1.079	4	0.0093829	0.79738	3	0.014977	1.5104	4	0.17522	0.69926	3
Qser1	0.041179	-1.191	1	0.76406	-1.4011	0	0.68397	-1.5961	1	0.95284	-3.718	0
Gm14496	0.041239	1.0738	3	0.9319	-7.7167	0	0.40636	-3.9662	1	0.068842	0.57765	2
Slc17a2	0.041291	-1.5018	1	0.066734	-0.5186	2	0.33793	-0.09435	2	0.44891	0.071215	1
Hdx	0.041368	-0.18369	3	0.79311	-2.5643	0	0.46773	-5.2187	2	0.95925	-0.66745	0
Zfp513	0.041503	-0.67074	2	0.60114	-4.2387	1	0.2164	0.26179	3	0.81506	-1.0657	1
Kif6	0.041525	-0.57856	2	0.73446	-4.2241	0	0.26133	-0.1646	2	0.36853	-0.15299	2
Tom1	0.041551	-1.6867	2	0.42211	-0.65576	1	0.0030114	-1.7006	2	0.25481	-4.0849	1
Prickle3	0.041569	-0.92253	1	0.13017	-0.0053178	2	0.47726	-1.6575	1	0.38749	-0.53287	1
Chrna4	0.041628	0.62106	4	0.28134	-0.017383	2	0.14984	-0.43676	2	0.78329	-0.9962	1
Ssbp2	0.04167	1.1294	4	0.21046	-0.47655	2	0.43124	-1.8141	1	0.52906	-0.46055	2
Slc2a6	0.041678	1.1875	3	0.50295	-4.3636	0	0.51917	-0.69585	1	0.73164	-0.19427	1
Klk1b11	0.041678	1.3033	4	0.43241	-3.9927	1	0.48193	-0.86245	1	0.99248	-2.5948	0
Ces4a	0.041734	0.62379	3	0.49239	-2.0414	1	0.88215	-1.3721	0	0.95283	-0.88406	0
Atxn7l3b	0.041854	0.647	3	0.77779	-2.9475	0	0.38214	-1.9329	2	0.50182	-0.3968	1
Ptplb	0.041859	-3.8944	1	0.75476	-1.6715	0	0.9032	-2.122	0	0.82333	-0.6383	0
Pik3r3	0.041874	0.56582	4	0.55921	-0.95828	1	0.63374	-0.72873	1	0.31614	-1.4229	1
Fnbp1l	0.041998	0.52233	4	0.85092	-2.446	0	0.92575	-3.6593	0	0.21042	-0.26292	3
Vmn2r12	0.041999	0.73745	4	0.60296	-4.9778	1	0.2812	-0.67913	3	0.12832	-0.10075	2
CTRLHS_57364	0.04204	1.8819	1	0.43059	-1.2624	0	0.83286	-2.9648	0	0.11939	1.0611	1
St6galnac5	0.042051	0.90238	4	0.98905	-3.7952	0	0.81981	-3.4963	0	0.88481	-0.60685	0
2700089E24Rik	0.042094	1.1729	4	0.19289	-1.8582	1	0.87967	-3.6697	0	0.036772	0.5881	3
Cd70	0.042102	0.94887	4	0.0021204	0.80364	4	0.28992	-0.56331	2	0.16438	0.27218	3
Nlk	0.042158	-0.3228	2	0.96454	-7.4222	0	0.12195	0.77634	3	0.27266	0.20388	2
Rbbp5	0.042179	0.48534	3	0.58185	-1.8017	1	0.41527	-0.60204	2	0.68894	-1.6379	2
Mtap6	0.042332	0.79385	3	0.098198	-1.1218	2	0.1305	-1.3795	1	0.69147	-3.4565	1
Zfand1	0.042438	-2.3421	1	0.91882	-7.7364	0	0.15548	-3.6341	1	0.10447	-2.4111	1
Zmynd19	0.042485	1.4333	3	0.68442	-1.2932	0	0.30384	-3.2264	1	0.74727	-3.0513	1
Tm9sf3	0.042564	0.6678	4	0.13269	-1.2268	2	0.053449	0.78617	4	0.80143	-0.61576	1
Il10	0.042584	0.19921	2	0.79812	-0.84203	0	0.42006	-4.1717	1	0.36536	-1.5053	2
Dusp1	0.042765	-1.5605	1	0.91247	-6.1137	0	0.73371	-4.4689	0	0.91225	-4.0121	0
Pnldc1	0.042787	-0.71058	3	0.22457	-0.85354	2	0.96355	-2.586	0	0.91941	-1.5175	0
St3gal5	0.04279	0.81695	4	0.54378	-2.0351	1	0.29221	-2.8724	2	0.043599	0.73482	3
Zfp498	0.042943	-1.0658	3	0.51714	-1.5079	1	0.32567	-5.8239	1	0.37211	-0.9241	2
Esp5	0.042963	0.91524	4	0.36091	-1.5581	1	0.48428	-1.2857	2	0.27565	0.10745	3
Ctf2	0.042995	0.68147	3	0.50941	-1.5863	1	0.08849	-0.37243	3	0.74378	-1.656	1
D630033O11Rik	0.043029	1.0672	3	0.88729	-5.5037	0	0.76598	-3.06	0	0.56186	0.18402	2
Birc2	0.04304	1.2236	3	0.027148	-1.7107	2	0.38695	-0.1238	1	0.54666	0.049707	2
1810022K09Rik	0.043046	-0.15566	3	0.90125	-2.5665	0	0.93389	-3.9737	0	0.96031	-1.6255	0
Fam169a	0.043069	-1.7155	2	0.70219	-2.4492	0	0.8467	-1.8631	0	0.91037	-0.51233	0
Cnot6	0.043107	0.52857	3	0.36457	-1.2082	1	0.095202	0.6634	3	0.13091	0.63248	4
Bcl3	0.043114	-1.0364	1	0.58579	-1.5285	0	0.42367	-4.9891	1	0.57323	-0.50264	2
Lysmd3	0.04319	0.95005	4	0.98941	-7.2444	0	0.79854	-0.40735	0	0.2555	-0.40574	2
Gars	0.043234	-1.2098	2	0.95674	-8.1106	0	0.73987	-2.408	0	0.76231	-1.4972	1
Tas2r115	0.043286	-0.63956	3	0.27202	-0.3922	1	0.13541	-3.1298	2	0.02888	0.9067	5
Kif14	0.043303	-2.0524	1	0.27894	-0.27652	1	0.84459	-1.0069	0	0.14636	0.049148	2
Foxp3	0.043407	-1.8301	2	0.35343	-0.97113	1	0.36248	-1.0228	2	0.65606	-1.1777	1
Gm5918	0.04355	1.1127	3	0.39032	-4.3695	1	0.44471	-2.0514	1	0.19285	-4.2283	1
Nanos2	0.043625	-0.73742	2	0.40794	-1.7845	1	0.095001	0.91958	3	0.63069	-2.2124	1
S100a9	0.043647	1.284	3	0.98101	-4.5093	0	0.16206	-2.9832	1	0.50822	0.10015	2
3110043O21Rik	0.04373	-2.6779	1	0.95376	-5.5728	0	0.95259	-2.5159	0	0.87787	-0.75272	0
Tns1	0.043775	1.2578	3	0.45086	-1.9832	1	0.66671	-1.3533	0	0.21567	0.11753	2
Ttc12	0.043783	0.55304	3	0.98183	-3.9446	0	0.44103	-1.9608	1	0.62109	-2.3872	2
Ccdc24	0.043876	0.64754	2	0.89933	-3.4767	0	0.46868	-1.3823	1	0.30995	-0.13604	2
Krt77	0.044087	0.060444	3	0.64109	-2.9606	0	0.87959	-4.2878	0	0.52196	-0.4579	1
Papolg	0.044095	-2.2662	1	0.69933	-0.72952	0	0.39169	-2.8258	2	0.084142	-1.5565	2
Cstf1	0.044322	0.099889	3	0.75216	-4.5263	0	0.076894	0.79613	4	0.60511	-2.0346	1
Siglech	0.044443	-0.42428	3	0.012581	0.55794	4	0.93847	-2.9868	0	0.67483	-1.6991	2
Klk14	0.044493	-2.63	1	0.41125	-0.50599	1	0.35963	-0.5666	1	0.81329	-2.6063	1
Sgip1	0.044595	-0.26519	1	0.5985	-1.89	0	0.38949	-0.091512	1	0.0045428	2.0254	3
Cdk5r1	0.044656	0.70533	4	0.37163	-0.63353	1	0.42811	-0.96794	1	0.35065	-1.841	1
Mrgpra3	0.044682	0.6571	3	0.18891	-2.9193	2	0.14535	-1.6358	2	0.68607	-0.033037	2
Ino80	0.044831	0.8384	3	0.23855	-3.5354	1	0.25963	-0.0059705	3	0.92991	-1.8779	0
Pou3f3	0.044938	-0.11506	2	0.11353	-4.363	1	0.49736	-2.9874	2	0.53728	-0.40282	1
Slc7a1	0.045184	0.37694	3	0.13588	-0.50596	2	0.37156	-0.23901	2	0.94675	-1.5095	0
Sf3b3	0.045302	1.7437	2	0.7685	-7.8038	0	0.013406	2.2112	2	0.00047412	3.2054	2
Apof	0.045306	1.3477	4	0.76502	-4.2168	0	0.50169	-1.8559	2	0.021542	0.89956	5
Lyst	0.045329	0.28189	3	0.95091	-5.6067	0	0.24284	-1.6256	3	0.69766	-0.20509	1
Prdm14	0.045389	0.63085	4	0.6741	-2.4387	0	0.31638	-3.873	2	0.68872	-1.6534	2
Vmn2r115	0.045426	-0.012339	2	0.20426	-7.5447	1	0.44229	-1.4632	2	0.5056	-1.474	2
Gpr97	0.045429	-1.274	2	0.48618	-0.46838	1	0.5265	-3.8927	2	0.84651	-0.23158	1
Foxd4	0.045444	1.1549	3	0.2665	-3.6821	1	0.23352	-0.86587	2	0.49109	-1.8503	1
Arhgap5	0.045509	0.6128	3	0.77967	-2.5636	0	0.28088	-4.7209	1	0.69608	-1.0792	1
Igfals	0.045526	1.3422	4	0.03335	-1.2522	2	0.096325	-0.068328	2	0.63247	-0.83837	1
Scamp5	0.045548	0.97762	3	0.59304	-1.5279	0	0.46392	-3.6144	1	0.89022	-1.2731	0
Fam43a	0.045602	-1.1915	1	0.83114	-1.9085	0	0.021398	-1.192	3	0.039512	-0.20345	3
Adh5	0.045672	0.60593	4	0.76746	-3.8783	0	0.75943	-1.3196	0	0.53988	-0.40445	1
Suv39h1	0.045713	0.73196	3	0.034095	-1.4708	1	0.60817	-2.3052	1	0.51814	-1.3147	2
Cgn	0.045767	0.88788	3	0.88664	-3.6937	0	0.28149	-0.99701	2	0.018894	-1.5227	2
Iws1	0.045896	0.49186	3	0.84871	-4.1797	0	0.75978	-1.1496	1	0.038103	0.94314	3
CTRLMM_66979	0.045896	2.2044	1	0.28394	-0.88485	0	0.065195	2.2616	1	0.013414	2.7369	1
Nap1l3	0.045925	0.65376	4	0.036222	-4.4844	2	0.49102	-1.2146	1	0.35153	-0.16647	2
Glb1l2	0.04604	0.65888	4	0.40575	-1.5605	1	0.83999	-1.9557	0	0.39463	-1.225	1
Ddit3	0.04604	0.56549	2	0.43891	-4.6297	1	0.17216	0.24829	2	0.97662	-3.4536	0
Rpl10l	0.046077	1.4265	3	0.0047812	-0.13773	2	0.022062	0.4903	2	0.75969	-0.88481	0
Tmem236	0.046094	0.26243	3	0.012887	-1.6775	1	0.40431	-0.34674	2	0.68646	-2.0491	1
Slc10a1	0.046143	0.62705	4	0.84532	-3.1308	0	0.059332	-5.4329	2	0.65962	-2.4386	1
Dcaf4	0.046346	-6.536	2	0.31488	-2.12	1	0.1311	-2.6656	1	0.80514	-0.80277	1
Ttc9c	0.046375	1.1124	4	0.43531	-1.5348	1	0.27928	0.12523	3	0.18496	0.47455	3
Hnf1b	0.046382	-0.64855	3	0.14392	-7.6136	1	0.28311	-1.0435	2	0.4971	-4.6208	2
Svs2	0.046554	1.0893	4	0.15002	-1.6077	1	0.7492	-3.1876	1	0.67011	-0.49541	2
Tubb4b	0.046561	0.81872	4	0.27823	-0.76558	2	0.11235	-0.087763	3	0.18919	-0.62758	2
Gapdh	0.046571	1.6857	2	0.90532	-8.0435	0	0.0054008	2.4644	3	0.98168	-7.2357	0
Apitd1	0.046585	0.61748	2	0.19114	-3.5801	1	0.25472	0.20361	1	0.28588	-0.73198	1
Idnk	0.046628	0.76597	3	0.81817	-2.347	0	0.54892	-0.81283	2	0.15818	-2.0753	2
Slc35f5	0.046639	0.9575	4	0.13938	-0.75039	1	0.41462	-4.0478	2	0.22228	0.12463	3
Treml2	0.046707	-4.083	2	0.34134	-4.8427	1	0.82947	-3.9228	0	0.28817	-1.8985	3
Chi3l3	0.046717	0.9236	4	0.43668	-5.2363	1	0.7239	-3.8168	1	0.45287	-0.6472	2
N4bp2	0.046842	1.0491	4	0.043126	-3.9502	2	0.51445	-4.121	2	0.3495	-0.16722	3
Accsl	0.046915	0.92744	4	0.34317	-2.7438	1	0.39196	-1.4193	2	0.81731	-1.6121	1
Xrcc6bp1	0.047081	0.67306	2	0.6352	-2.972	0	0.15651	-4.0293	1	0.69874	-2.6153	1
Fam81a	0.047168	0.41951	3	0.21501	-0.89276	2	0.58826	-2.3025	1	0.045278	-0.5706	2
Smpd4	0.04721	1.0289	4	0.87232	-1.4383	0	0.7753	-1.0235	1	0.6587	-0.67037	2
Tnfaip8	0.047257	-0.30843	3	0.12762	-7.7849	1	0.53107	-1.2196	1	0.18301	0.23693	3
Gjc3	0.047266	1.1952	4	0.13282	-1.323	2	0.67678	-4.5794	1	0.1442	-1.5495	2
Tas2r102	0.047277	0.10697	3	0.82153	-1.0792	0	0.094325	0.19895	3	0.47236	-0.044431	2
Mmp24	0.0474	-0.30899	3	0.19087	-0.57783	1	0.59149	-1.443	1	0.022666	0.79256	4
Yy1	0.047417	0.68013	4	0.82484	-7.2498	0	0.022928	0.6817	4	0.9647	-2.0845	0
Alpk1	0.047527	1.3114	4	0.014137	-0.70014	2	0.93624	-3.5713	0	0.59701	-5.8058	1
Ssh1	0.04753	-0.29756	2	0.69147	-5.0889	0	0.30167	-0.88642	1	0.082445	0.30345	3
Zbtb25	0.047546	0.98718	4	0.34782	-2.9205	1	0.021228	-2.1749	1	0.94687	-1.9436	0
Spz1	0.047583	0.78683	4	0.26166	-2.9933	2	0.83857	-3.4724	0	0.41724	-1.4101	1
Lyzl1	0.047658	0.55327	3	0.030793	-0.94841	3	0.29804	-1.9787	2	0.65022	0.036586	2
Ltc4s	0.047718	0.70913	4	0.67509	-1.7166	0	0.60932	-0.71088	1	0.11687	-0.053328	2
Crcp	0.047732	0.27568	1	0.3944	-0.45314	0	0.80831	-4.9567	0	0.60922	0.14855	1
Hpdl	0.047831	0.1613	3	0.47277	-3.5577	1	0.77345	-2.0884	1	0.29615	-0.90355	2
Gm14322	0.047874	-0.62867	2	0.46366	-4.8548	1	0.06248	0.97158	3	0.34354	-1.7946	1
Baz1b	0.04794	0.40085	4	0.26713	-1.6206	1	0.84682	-0.57195	0	0.79796	-0.79468	1
Esrp2	0.048066	0.89439	4	0.68488	-1.5978	0	0.79682	-2.3911	1	0.29562	-0.51797	3
Oxct2b	0.048159	0.95542	4	0.15411	-2.5269	1	0.1009	-0.5692	2	0.46014	-2.9059	2
Mpi	0.048183	-0.2702	3	0.4805	-6.7704	1	0.023992	0.75552	3	0.067256	-0.83249	1
Galt	0.048263	1.1375	3	0.20247	-0.76981	1	0.60335	0.0080898	1	0.60443	-2.1011	1
Atp6v1g3	0.048473	0.99408	4	0.81049	-0.92061	0	0.72477	-3.557	1	0.074704	0.63664	3
Mylk3	0.04853	0.79039	3	0.87712	-2.3002	0	0.42379	-1.5963	2	0.63794	-0.11118	2
Dclk2	0.048574	-0.083868	3	0.60244	-2.0874	1	0.65261	-4.0571	1	0.84302	-1.6437	1
Foxn3	0.048676	-0.62985	3	0.88058	-2.9409	0	0.7388	-1.0881	1	0.41093	-0.2955	2
Ccnb1ip1	0.048698	-0.21314	3	0.30197	-2.3775	1	0.85834	-2.231	0	0.47441	-1.7655	1
Itgb3bp	0.048722	0.86852	4	0.10306	-2.8759	2	0.67545	-1.0277	1	0.11145	-0.90936	2
Lrrc29	0.048722	0.1008	3	0.35372	-5.0065	1	0.48466	-1.5059	1	0.52455	-0.50526	2
Ubtd2	0.048789	-0.01685	3	0.53668	-2.5544	1	0.76039	-3.9148	1	0.89158	-2.9263	0
D11Wsu47e	0.048794	0.40142	3	0.35162	-2.0975	1	0.72755	-1.0328	1	0.72318	-0.79475	1
Rnf11	0.048799	0.97532	4	0.97032	-2.963	0	0.15129	-1.0994	2	0.50984	-0.35037	2
Hscb	0.048852	-1.9132	2	0.34802	-2.356	1	0.77698	-3.3205	0	0.7739	-0.47932	0
Sik2	0.048937	1.0996	4	0.44771	-3.8897	1	0.13855	-1.5193	1	0.29017	-0.68137	1
Tfr2	0.048939	1.1506	4	0.065009	-3.9074	2	0.92943	-1.6616	0	0.4986	-1.3288	1
Lrrn1	0.048948	-0.50768	3	0.74098	-1.7687	0	0.23792	-2.6639	2	0.18186	0.13763	3
Becn1	0.048958	-1.4217	3	0.1616	-0.92122	1	0.72161	-1.9475	1	0.27695	0.41604	3
Taf1a	0.048968	-0.89882	1	0.57363	-7.0685	0	0.10582	1.0004	3	0.4341	-0.033773	2
Lrdd	0.048969	1.1786	4	0.65377	-2.6987	0	0.8953	-3.4656	0	0.91837	-1.9192	0
Golga1	0.048999	1.1772	3	0.85098	-2.6822	0	0.086756	0.76885	3	0.029819	0.78914	4
D16H22S680E	0.049031	0.56245	4	0.012842	0.011757	2	0.45118	-1.1953	2	0.58477	-1.5862	2
Stmn2	0.049146	-1.8469	2	0.65267	-1.5519	0	0.66414	-3.6438	1	0.68613	-1.4542	2
Nbeal1	0.049264	-0.053129	3	0.70075	-0.80052	0	0.32174	-1.6686	2	0.87933	-2.4124	0
Gzmc	0.049297	0.99013	4	0.33912	-2.8806	1	0.2037	-2.4848	2	0.14395	-2.4768	1
Smox	0.049314	1.5147	3	0.010158	-6.7029	1	0.65071	-1.7574	1	0.65543	-0.39943	1
Sec13	0.049377	1.0114	4	0.95214	-4.9848	0	0.13341	-2.5913	2	0.4258	-0.57892	2
Ero1l	0.049387	-1.1809	2	0.080076	-0.91058	2	0.50576	-1.0343	1	0.67939	-0.55229	1
ORF63	0.049394	-8.2553	1	0.091169	-2.1588	1	0.91527	-4.208	0	0.72545	-2.3402	1
Hyi	0.049396	1.1116	4	0.50734	-3.1571	1	0.002595	1.9366	4	0.11811	0.57359	4
Mdk	0.049419	-0.28927	1	0.54497	-1.8419	1	0.23384	-1.288	1	0.68524	-1.366	2
Sep.07	0.049458	1.2816	3	0.68182	-2.514	0	0.60326	-2.8468	1	0.03769	0.99978	3
Sec16b	0.049555	0.83978	4	0.11492	-1.4097	2	0.53705	-1.1637	2	0.035256	0.5333	5
Tex10	0.049568	0.1102	3	0.50032	-0.43327	1	0.053585	0.70396	3	0.80859	-2.6369	1
Ctrb1	0.049595	0.30616	3	0.92901	-2.753	0	0.19642	-2.3811	1	0.35033	-2.637	2
Papss1	0.049663	0.85547	3	0.82686	-1.6794	0	0.69916	-3.6167	0	0.8031	-0.97126	0
C1qc	0.049733	-1.0381	1	0.49106	-4.7995	1	0.059023	-3.0732	1	0.66462	-1.7132	1
Cep290	0.049782	1.3291	3	0.52445	-1.7507	1	0.30203	-0.39549	2	0.31174	-0.93154	2
Rnaseh1	0.049834	-0.55476	2	0.84617	-7.2266	0	0.66768	-2.473	1	0.647	-0.74893	2
Tubb1	0.049856	0.76791	3	0.65092	-3.2673	0	0.13679	-0.65608	3	0.60206	-1.5396	2
Mia1	0.049858	0.99451	4	0.78858	-4.936	0	0.14109	-0.67016	1	0.73629	-2.8798	1
Nkx2-5	0.04993	0.64103	4	0.51053	-2.2116	1	0.70457	-2.8269	1	0.8074	-1.6013	1
CTRLHS_57487	0.04994	1.6431	1	0.43142	-1.0199	0	0.098428	1.3637	1	0.99726	-9.288	0
S100a7a	0.050176	-0.72188	3	0.045229	-7.3592	1	0.018141	-0.29992	2	0.64452	-2.2121	2
Hnrnpf	0.050223	0.99467	4	0.99478	-7.6255	0	0.029937	0.86181	3	0.92594	-2.3944	0
Capsl	0.050233	-1.9413	2	0.19798	-2.4859	2	0.66114	-4.7146	1	0.16237	0.18304	3
Gpbp1l1	0.050324	-0.11546	3	0.35636	-3.2255	1	0.85623	-4.0901	0	0.42387	-0.84675	1
CTRLHS_57128	0.050447	1.7709	1	0.1464	0.22915	1	0.9129	-3.9621	0	0.88756	-2.6231	0
Gli1	0.050468	0.43501	4	0.050841	-0.38637	2	0.033478	0.92392	3	0.99395	-1.2222	0
Fbxo42	0.050497	0.11925	3	0.32471	-0.876	1	0.42076	-0.57233	1	0.5822	-0.017482	2
Foxi1	0.050547	0.46609	3	0.80782	-1.6975	0	0.52534	-0.80165	2	0.29078	-0.49509	2
Ssbp1	0.050578	-5.5822	1	0.85974	-3.2695	0	0.80533	-3.4579	0	0.94248	-1.3257	0
Dimt1	0.050739	-0.40174	2	0.0060204	0.95992	3	0.57613	-0.80894	1	0.53701	-0.034146	1
Gstt1	0.050881	-1.0439	2	0.53283	-2.5922	1	0.068557	0.50056	4	0.33893	0.25944	3
Crym	0.051029	0.7418	3	0.15735	-1.4457	2	0.61108	-3.8659	1	0.16193	0.21675	3
Aptx	0.051038	-0.073632	2	0.047657	-2.4772	1	0.24032	-1.4219	2	0.30467	0.24624	3
Car12	0.051061	0.81911	4	0.44757	-0.86091	1	0.25106	-0.24208	3	0.60888	-0.35487	1
Cd247	0.051116	0.55722	4	0.64968	-1.553	0	0.63754	-2.4308	1	0.10096	-0.43524	2
CTRLHS_57471	0.051186	1.627	1	0.90469	-2.5228	0	0.98095	-4.5333	0	0.11967	0.95528	1
Psmd8	0.051316	0.04388	3	0.88003	-2.659	0	0.052399	0.99285	4	0.57066	-0.45177	2
BC005537	0.051354	0.47841	4	0.58315	-1.3021	1	0.11099	-1.8333	3	0.17214	-0.19121	2
Ceacam15	0.051425	1.1799	3	0.67273	-3.4054	0	0.63906	-2.7689	1	0.78334	-0.34593	1
Cct6b	0.051474	1.0358	4	0.61195	-7.3528	1	0.41572	-0.72141	2	0.66056	-1.622	1
Spsb1	0.051544	-0.85842	2	0.31443	-2.3823	1	0.7206	-2.6882	1	0.84602	-0.59814	0
Stradb	0.051666	0.50389	4	0.62846	-2.0826	0	0.89425	-1.1655	0	0.49756	-0.78256	2
Flt4	0.051702	0.46098	3	0.21931	-1.2515	1	0.012918	1.0853	4	0.86834	-0.67621	1
Cyp2w1	0.051764	0.88051	4	0.66369	-6.3571	0	0.50639	-2.4923	2	0.47932	-1.7639	1
Tor1b	0.051821	1.0579	4	0.52188	-1.5311	1	0.045125	0.92666	4	0.097528	-2.7757	2
Galns	0.051839	-0.15565	3	0.38574	-2.3839	1	0.44243	-1.6373	2	0.14939	0.44155	3
Lman2	0.051971	1.4527	3	0.68663	-2.6177	0	0.062469	-0.44074	2	0.10807	-1.9628	2
Dqx1	0.051982	-0.26741	1	0.23508	-7.791	1	0.5961	-2.9854	1	0.58278	-1.2841	2
Wdr54	0.052058	0.91437	4	0.57436	-3.2147	1	0.84235	-2.9336	0	0.4857	-1.0873	1
1700101E01Rik	0.052138	0.861	4	0.96348	-6.4481	0	0.58925	-2.6577	1	0.1725	-2.3227	1
4430402I18Rik	0.052147	0.41333	3	0.0050375	1.2085	3	0.95294	-2.2597	0	0.38648	-0.17267	2
Rdbp	0.052209	0.018279	2	0.95158	-8.0077	0	0.53651	-4.0389	1	0.91283	-0.95477	0
Uty	0.052218	0.97958	4	0.54039	-0.68806	1	0.63157	-2.9265	1	0.35332	-0.052777	3
Phgr1	0.052233	0.1886	2	0.54369	-3.9803	1	0.098439	-2.8486	2	0.79389	-0.87041	1
Mrps11	0.052271	0.93043	4	0.90439	-1.7977	0	0.68747	-1.0764	1	0.34121	-0.72862	3
Wee1	0.052297	-3.3186	2	0.58032	-6.4574	0	0.075749	-1.243	1	0.29706	0.40883	2
C630004H02Rik	0.052378	1.0043	3	0.41352	-2.0958	1	0.65493	-2.029	1	0.17083	-1.4096	1
Rab5c	0.052397	1.199	3	0.64133	-0.74338	0	0.77848	-2.7892	0	0.34565	-0.25864	2
Retn	0.05242	0.050245	2	0.38124	-1.0779	1	0.81938	-1.1799	0	0.55758	-0.85803	1
Bcl2a1a	0.052431	1.0175	3	0.61426	-4.9107	0	0.016316	1.3876	3	0.58447	-1.6762	1
Tmem35	0.052462	0.96157	4	0.33556	-2.4787	1	0.17617	-2.968	2	0.10454	-0.085289	3
Ddx46	0.052618	0.78165	3	0.81582	-7.455	0	0.43832	-0.91747	2	0.57415	-1.3948	1
Gm9573	0.052666	1.0014	4	0.96725	-6.126	0	0.25265	-1.8856	3	0.60843	-4.0874	2
Cbs	0.05269	0.91734	3	0.1784	-1.3656	2	0.52344	-1.9626	1	0.9852	-1.543	0
Gm5148	0.052708	-0.70313	2	0.61712	-1.9159	0	0.50269	-1.3543	1	0.28398	-0.60187	1
Eda2r	0.052839	1.3858	3	0.58873	-2.5378	0	0.96755	-5.7423	0	0.84523	-5.5986	0
Muc5ac	0.052855	0.92116	4	0.34904	-2.9313	1	0.48968	-0.11331	2	0.74455	-0.88725	1
Mettl4	0.052909	0.36482	3	0.011411	-1.6285	1	0.24194	-0.38919	3	0.64481	-0.18633	2
Sgsm3	0.052968	0.51336	4	0.08629	-8.0784	2	0.22288	-0.75283	2	0.82967	-0.55891	0
CTRLMM_66419	0.053102	1.9299	1	0.38231	-1.3641	0	0.89174	-6.1283	0	0.19727	0.72516	1
Zfp616	0.053106	0.61902	4	0.035491	-2.1311	1	0.90617	-3.6873	0	0.65733	-0.34353	1
Spata3	0.053216	0.87546	4	0.42961	-4.7223	1	0.12381	0.51221	3	0.40052	-2.219	1
Slc10a5	0.053232	-1.2196	2	0.3081	-3.4351	1	0.96252	-2.6504	0	0.68663	-0.89832	1
Fis1	0.053292	-1.009	1	0.36646	-3.188	1	0.82341	-3.7053	0	0.19513	-0.066107	3
Vmn1r6	0.053367	-1.3324	3	0.4739	-1.8582	1	0.74743	-1.0395	0	0.34893	0.069847	2
Chac1	0.053556	1.0297	4	0.96958	-2.9582	0	0.77072	-4.7586	1	0.95337	-1.813	0
Tnpo2	0.053621	0.73932	4	0.35954	-2.7527	1	0.21662	-2.3992	1	0.88977	-1.7763	0
2310057M21Rik	0.053622	-0.99404	2	0.93078	-2.1375	0	0.64621	-3.9599	1	0.75306	-5.0892	1
Tnfrsf1a	0.054067	-0.26216	1	0.40008	-1.8565	1	0.41821	-0.78572	1	0.14468	0.73057	3
Elf4	0.054076	1.2094	3	0.62982	-2.6867	0	0.014296	1.0767	4	0.79229	-0.22348	1
Icam1	0.054084	-0.092149	2	0.84553	-1.0116	0	0.84452	-2.0636	0	0.34862	-0.021369	2
Pgap3	0.054118	-0.18275	3	0.18936	-1.13	2	0.78503	-2.4054	1	0.36796	-5.6402	1
Zfp563	0.054132	-0.07622	2	0.63477	-2.0358	0	0.97682	-4.8407	0	0.25648	-1.1593	1
Kcnc4	0.054257	1.0182	4	0.084508	-0.082801	1	0.77453	-1.581	1	0.74966	-1.5448	1
Amdhd1	0.05438	0.41087	3	0.1261	-2.6007	1	0.84967	-2.3151	0	0.27064	-0.095762	3
Krtap1-3	0.054479	1.3141	3	0.89174	-2.4241	0	0.18041	-0.71556	1	0.89679	-3.5053	0
Far1	0.054535	0.6652	4	0.50879	-2.2435	1	0.66818	-1.595	1	0.25843	-0.093182	3
Akap3	0.054541	0.80514	4	0.30937	-2.0008	1	0.80544	-1.5108	0	0.76942	-3.4019	1
Ptprn	0.054595	-0.52969	3	0.39971	-4.7235	1	0.0085682	1.3048	4	0.085148	-0.16112	1
Ppap2c	0.054806	0.63217	4	0.42656	-0.67435	1	0.75389	-2.8161	1	0.72513	-1.4347	1
Slamf6	0.054847	-0.32037	2	0.35301	-0.77651	1	0.79914	-2.1123	1	0.27801	0.12212	3
Slc35c1	0.054858	0.945	4	0.77778	-3.5581	0	0.96356	-2.0683	0	0.64244	-1.4512	1
Cdc123	0.054957	0.256	3	0.29798	-0.87558	2	0.26033	-0.36609	3	0.15743	-0.59173	3
Cyp2j13	0.055029	0.94329	4	0.75093	-5.5775	0	0.80512	-3.2845	0	0.45703	-1.0557	1
Cd276	0.055049	0.35043	3	0.33301	-1.0009	1	0.2497	-0.95899	2	0.16143	0.50682	4
Ccr7	0.055151	-0.69466	2	0.46072	-1.8162	1	0.90212	-2.01	0	0.90711	-1.8033	0
Mad2l1bp	0.055183	0.77101	4	0.9965	-7.6796	0	0.62249	-4.3411	1	0.1422	-1.0715	1
Ubxn2b	0.05534	0.95539	4	0.22011	-1.9602	1	0.82357	-1.5667	0	0.89151	-0.52579	0
Klhl31	0.055347	-0.38738	2	0.33915	-3.4622	1	0.413	-3.3802	2	0.90671	-2.3216	0
Ccbe1	0.055358	0.49362	4	0.047627	-3.5122	2	0.85106	-2.4643	0	0.93774	-2.3485	0
Gadd45g	0.055422	0.74266	3	0.44203	-3.7218	0	0.039514	1.3866	2	0.0494	2.031	2
Rgn	0.055463	0.953	4	0.15361	-0.17532	2	0.15955	-2.0536	2	0.77663	-1.8722	1
Gnptab	0.055531	0.7943	4	0.86469	-2.2849	0	0.31554	-2.0825	2	0.036244	-0.30269	2
Hcrtr2	0.055531	0.67161	3	0.53322	-1.6837	1	0.51206	-1.7788	1	0.11065	0.45554	4
CTRLMM_67045	0.05556	1.8956	1	0.67008	-3.2436	0	0.85242	-5.2962	0	0.43335	-0.47099	0
Fbxl5	0.055643	-3.3569	1	0.97998	-5.2844	0	0.29715	-1.6935	1	0.52585	-1.2087	1
Stat3	0.055793	-0.46724	1	0.16419	0.05828	2	0.31678	-0.94199	2	0.099612	0.73567	3
Col1a2	0.055796	-0.38953	2	0.87475	-1.4029	0	0.2791	-0.091119	2	0.22777	-1.2949	2
Ptgs2	0.055852	0.79719	4	0.79083	-2.731	0	0.25342	-0.41122	2	0.79829	-0.13791	1
Idh3g	0.055892	0.71068	4	0.071803	-1.4431	2	0.92926	-2.5735	0	0.65592	-2.1245	2
Ski	0.055935	1.2183	3	0.46907	-1.4276	0	0.74977	-1.0582	0	0.40732	-5.896	1
Cbx1	0.055978	-0.050193	2	0.49078	-2.0676	1	0.25568	-2.2496	2	0.61803	-0.5747	1
Sgsm2	0.056054	0.98597	4	0.47298	-2.1162	1	0.14605	0.50709	3	0.6913	-2.1902	1
6330407J23Rik	0.056094	1.4686	3	0.78184	-5.5259	0	0.1857	-1.9852	1	0.58304	-0.61	1
Hist1h4h	0.056102	1.8062	2	0.73885	-2.0897	0	0.30871	-2.9007	1	0.09338	1.422	2
Evx2	0.056152	0.70443	4	0.16892	-4.2734	1	0.52314	-1.1051	2	0.3875	-0.12703	1
Tnrc6b	0.056153	1.0093	4	0.88973	-2.7167	0	0.84446	-2.8704	0	0.41219	-1.1791	3
Rwdd4a	0.056211	-1.114	2	0.19045	-1.2701	1	0.86201	-2.8831	0	0.073261	1.4706	3
Rhd	0.056219	-0.98276	2	0.30688	-4.4068	2	0.38114	-1.3992	2	0.77131	-1.003	1
Prnp	0.056241	0.49331	4	0.54886	-2.4285	1	0.40904	-0.70467	2	0.12431	0.31648	4
Nr3c2	0.056276	0.59699	4	0.056512	0.051094	3	0.35532	-1.3033	2	0.58698	-0.75847	2
Prhoxnb	0.056317	0.92029	4	0.76413	-5.728	0	0.90749	-2.9482	0	0.064142	-0.65433	1
D930015E06Rik	0.056347	0.24513	3	0.80454	-1.6434	0	0.20614	-0.67808	3	0.74379	-1.2719	1
Cyp2j12	0.056391	0.92593	4	0.85896	-2.3058	0	0.18097	-0.66725	2	0.9979	-8.3772	0
Ppfibp2	0.056412	-3.7843	2	0.6528	-1.4471	0	0.7521	-5.1845	0	0.776	-2.7547	1
Trappc4	0.056561	-0.56577	2	0.2865	-5.3683	1	0.503	-3.1874	1	0.7195	-5.3032	1
Vgf	0.056575	-2.775	2	0.444	-4.4088	1	0.56347	-5.0827	1	0.68025	-0.58127	2
Ttl	0.056618	0.77307	4	0.53273	-1.6796	1	0.81514	-2.7144	0	0.1856	-0.060932	3
Tmc3	0.056728	-0.58334	3	0.95739	-7.1382	0	0.94791	-2.5631	0	0.09556	0.72838	4
Fnbp4	0.05675	1.0854	4	0.44461	-7.2515	1	0.49426	0.21927	2	0.38171	-1.0818	3
Fbxo15	0.056795	0.31	3	0.85677	-3.1033	0	0.42787	-1.0983	2	0.030937	1.004	4
Ky	0.056799	-0.92552	1	0.85585	-2.7961	0	0.91876	-3.8464	0	0.075779	0.24676	2
Hoxc5	0.056827	0.41954	4	0.36218	-3.392	1	0.16311	-1.4458	2	0.78086	-0.4415	1
1700027D21Rik	0.056869	0.9977	4	0.45002	-2.6014	1	0.60337	-2.5321	1	0.61484	-1.3315	2
Sprr1a	0.056927	0.96186	4	0.87336	-1.7508	0	0.6342	-1.562	1	0.13923	0.70513	4
Sox13	0.057023	1.204	3	0.63081	-3.5065	0	0.51662	-6.1547	1	0.9197	-1.5105	0
Faim	0.057105	-0.0027058	3	0.26798	-1.4864	2	0.060504	0.074893	3	0.39193	-0.37742	3
Chrna1	0.057162	0.83415	4	0.721	-1.3618	0	0.0017596	1.4515	5	0.54578	-1.5395	1
Prkaa1	0.057185	0.45252	4	0.10376	-0.2616	2	0.103	-0.25965	3	0.59522	-1.5049	1
Cd55	0.057293	1.1194	3	0.89034	-2.9282	0	0.30546	-0.0070199	2	0.5239	-1.7832	1
Phf3	0.057321	-0.94913	3	0.82116	-2.9148	0	0.77687	-2.2805	1	0.54003	-2.0141	2
Arhgap44	0.057339	-0.55204	2	0.023824	0.65231	3	0.7989	-3.3448	1	0.22653	-0.93133	1
Ces2f	0.057409	0.08945	2	0.14902	-1.0317	2	0.45248	-0.79877	2	0.74664	-0.73806	1
Elof1	0.057413	1.5231	3	0.52216	-1.1433	1	0.2308	-4.8186	2	0.079924	-0.4666	2
G0s2	0.057426	1.1452	4	0.78208	-7.9087	0	0.98328	-2.9061	0	0.32892	-0.63315	1
Ppp1r13l	0.05745	0.22681	3	0.30057	-0.75582	2	0.59403	-2.8945	1	0.79892	-0.35109	1
Rps17	0.057541	-1.319	2	0.80568	-6.7425	0	0.20278	-1.6122	2	0.24169	-3.2947	1
Gm12253	0.057561	-0.034644	3	0.39881	-1.015	1	0.21508	-2.1818	1	0.5177	-0.27938	2
Gbp7	0.057626	1.2448	3	0.15822	-3.0192	1	0.32684	-2.6739	1	0.88272	-2.1542	0
Arhgdig	0.057646	-0.4839	2	0.69492	-2.6658	0	0.61294	-2.8586	1	0.66545	-0.68275	2
Krtap5-3	0.057734	1.1129	4	0.97786	-7.1881	0	0.79589	-5.0986	1	0.84235	-5.5351	1
CTRLHS_57425	0.057794	1.7407	1	0.90135	-4.5607	0	0.71032	-2.4034	0	0.57862	-1.0579	0
E130012A19Rik	0.057813	1.1683	4	0.87256	-2.9762	0	0.83821	-1.4159	0	0.16176	-0.76444	2
Prdm5	0.057815	0.33305	4	0.73203	-2.8401	0	0.31323	-2.6205	2	0.27897	-0.11063	3
Ift52	0.057844	-2.5401	2	0.29542	-2.4414	1	0.54374	-0.40347	1	0.7331	-1.3873	1
CTRLHS_58021	0.057964	1.621	1	0.54092	-1.4607	0	0.57547	-1.3952	0	0.87832	-2.1714	0
Sep.12	0.057992	-0.29178	2	0.63387	-1.2028	0	0.72426	-0.59143	1	0.042815	0.62417	3
Tmub1	0.057993	-1.3682	2	0.73694	-3.0072	0	0.014631	0.90698	2	0.68605	-0.80967	1
Ap4e1	0.05806	0.96405	4	0.3757	-3.2695	1	0.090809	-0.82707	3	0.73722	-1.6057	1
Srebf2	0.058076	0.48286	4	0.96913	-1.9022	0	0.64295	-0.35766	1	0.013312	0.88311	4
Vmn1r32	0.058104	-1.1958	1	0.12446	-1.9412	1	0.61025	-0.69339	0	0.80792	-2.1474	0
Rcc2	0.058163	-1.802	1	0.98904	-2.8778	0	0.81651	-0.94119	0	0.62535	-0.55881	2
Shox2	0.058164	0.56118	3	0.20572	-1.3244	2	0.10336	-0.75408	2	0.5862	-1.0744	2
Rab9	0.058307	-0.35738	3	0.50241	-2.1543	1	0.86302	-3.4009	0	0.42675	-1.4989	2
Snap29	0.058326	0.082481	2	0.25284	-1.5348	2	0.3488	-1.122	1	0.82731	-0.80016	1
Trim9	0.058332	0.50941	3	0.27173	-1.7774	1	0.33094	-0.66929	2	0.58042	-0.282	2
Tbx22	0.058353	-0.35871	1	0.56564	-2.5534	0	0.16505	-0.63197	1	0.36442	0.27554	2
Vsig10	0.058435	-2.0521	1	0.4509	-4.2587	1	0.23973	-0.078112	2	0.96574	-3.961	0
Cpsf2	0.058457	0.77183	3	0.72477	-3.874	0	0.090895	-1.8683	2	0.056246	0.99597	4
Nsmaf	0.058478	0.8442	4	0.14226	-0.86302	2	0.073512	0.47268	4	0.22182	-1.6334	2
Gipc2	0.058478	0.33308	3	0.68897	-2.331	0	0.31598	-0.41076	2	0.64956	-0.31377	2
Zfp408	0.058488	0.17423	3	0.33245	-2.6713	2	0.02003	0.063348	2	0.18229	-2.5431	2
Zranb1	0.058488	0.43856	4	0.87669	-2.0527	0	0.3636	-1.6452	1	0.53413	-0.030498	2
Pydc3	0.058641	0.28637	3	0.43145	-2.6934	1	0.024875	1.1584	4	0.84886	-0.59422	1
Psg22	0.058805	0.18484	3	0.30521	-6.0808	1	0.38034	-2.571	2	0.025448	1.28	4
Gprin1	0.058972	-5.5619	1	0.26222	-2.2912	2	0.70105	-0.67445	1	0.72632	-0.61195	1
Prss36	0.059061	0.42934	2	0.33217	-3.8856	1	0.24935	0.41023	2	0.97157	-2.5545	0
Tmem200a	0.05911	1.1191	3	0.24493	-4.4372	1	0.6593	-4.492	1	0.28324	-0.64443	1
Grhl3	0.059133	-0.84929	2	0.99962	-6.3814	0	0.2983	-1.4863	1	0.81297	-1.4085	1
D10Wsu102e	0.059156	1.0121	3	0.60953	-3.45	0	0.040077	-2.414	1	0.35894	0.4197	2
Epyc	0.059194	-3.363	2	0.86034	-2.92	0	0.50191	-2.2659	2	0.051171	0.86008	4
Tns3	0.059219	-2.8682	2	0.33263	-1.6005	1	0.50264	-0.7434	2	0.71262	-0.77369	1
Mllt3	0.059268	-1.6997	1	0.15452	-2.7667	1	0.67665	-1.7994	0	0.033995	-1.0082	1
Srrt	0.059336	0.24315	3	0.17482	-1.9133	2	0.73054	-0.98809	1	0.48965	0.16835	2
Lipi	0.059391	-0.18656	2	0.58921	-1.2834	0	0.2134	-1.4206	1	0.99112	-2.5446	0
Mag	0.059395	0.64742	4	0.40839	-0.22473	0	0.85706	-2.8393	0	0.73125	-3.0262	1
Rab11a	0.059426	-1.6316	1	0.6964	-1.4026	0	0.74668	-1.7012	1	0.48318	-1.0382	2
Pbdc1	0.059482	0.12558	3	0.080039	-1.475	3	0.099615	-3.4281	1	0.79583	-1.4401	1
Kndc1	0.05949	0.84552	4	0.53642	-5.35	1	0.057057	-3.7616	1	0.67419	-0.96737	2
Serp1	0.059634	1.311	3	0.40076	-4.2791	1	0.29195	-0.96386	2	0.87638	-1.3195	0
Tinag	0.05975	-1.3391	1	0.45217	-5.8045	1	0.63493	-1.8967	1	0.45086	-0.17332	1
Neb	0.059811	0.53476	3	0.90884	-6.3959	0	0.96422	-5.899	0	0.35516	0.34541	3
Trim46	0.05989	-1.361	2	0.43644	-1.0449	1	0.38744	-1.363	2	0.26496	0.39552	3
Lrrc18	0.059902	1.1835	3	0.94897	-7.1078	0	0.30884	0.092897	2	0.90093	-0.53813	0
AI593442	0.059971	0.63216	4	0.53773	-2.6313	1	0.63953	-1.9061	1	0.17914	-0.34097	2
Hif1an	0.060032	0.75379	3	0.82309	-3.2866	0	0.8917	-1.0244	0	0.69733	-0.77613	1
Zfp600	0.060162	1.7538	2	0.56869	-4.1982	0	0.052425	0.26189	1	0.41036	-2.5781	1
Rspo3	0.060163	1.4016	3	0.090324	-0.81796	2	0.64918	-4.1359	1	0.49376	-1.4968	2
Arhgef16	0.060167	0.71646	3	0.81802	-3.42	0	0.83062	-0.47757	0	0.74074	-5.5571	1
Gpr137b	0.060334	1.1392	4	0.93904	-7.0083	0	0.32504	-1.8216	2	0.14504	-0.10646	1
Lamb2	0.060401	0.71768	4	0.85702	-2.1547	0	0.090359	-1.0513	2	0.67869	-0.28091	2
Pklr	0.060484	0.8427	4	0.09748	-2.6289	1	0.89071	-1.6323	0	0.14563	0.65207	4
Pdcd10	0.060596	-0.12282	2	0.95336	-7.0427	0	0.57612	-4.1498	1	0.73012	-1.2107	1
Wdr27	0.060598	-0.40552	2	0.26874	-2.1321	1	0.60721	-1.678	1	0.86241	-1.4614	0
Zfp276	0.060675	0.73404	4	0.75384	-3.7518	0	0.2177	-0.26393	3	0.12687	-0.21763	3
Lrig2	0.060687	0.86424	3	0.84981	-1.9301	0	0.57757	-5.2185	1	0.83636	-0.26841	0
Rab33b	0.060715	1.1159	3	0.11962	0.36645	2	0.050805	-0.3487	2	0.67236	-2.9161	1
Trim68	0.060719	1.1966	3	0.87739	-1.7029	0	0.52284	-0.45119	1	0.54938	-1.9328	2
Gas7	0.060783	0.18118	3	0.39629	-4.0714	1	0.95847	-3.3304	0	0.042811	1.1503	4
Rgp1	0.06083	-1.4833	2	0.7117	-5.2144	0	0.045936	-0.30102	2	0.42987	-6.8349	1
1810041L15Rik	0.06087	-1.7058	2	0.24953	-1.6729	2	0.78809	-2.2347	1	0.045923	-0.70525	2
Acsl5	0.060884	-0.93207	2	0.2282	0.20053	2	0.51471	-4.7172	1	0.41996	-1.1754	2
Gm4788	0.060928	-0.89436	3	0.48027	-5.1959	1	0.55829	-0.20573	1	0.82223	-1.3855	1
Brf2	0.060929	1.1673	3	0.90737	-2.184	0	0.50611	-0.84375	1	0.1571	0.68871	3
Slmap	0.061003	-0.29023	3	0.9689	-6.8349	0	0.89438	-1.5903	0	0.98013	-1.4783	0
Bpifb9b	0.061023	-1.0718	1	0.78063	-2.7816	0	0.17575	0.37596	3	0.23618	-0.98302	3
0610007P14Rik	0.061081	0.78486	3	0.531	-1.9359	1	0.55195	-2.6099	2	0.85022	-1.5952	1
CTRLMM_66759	0.061114	1.9185	1	0.28535	-0.80587	0	0.30904	-0.36537	0	0.21344	0.67932	1
Nbas	0.06133	1.0663	3	0.8062	-3.9494	0	0.43959	-1.1066	2	0.49946	-1.5381	2
Mettl5	0.06134	0.22901	3	0.01106	-0.028007	2	0.66776	-1.5038	1	0.57655	-0.3017	1
Nsg2	0.061348	-0.85391	3	0.73479	-3.7892	0	0.090471	-0.38882	3	0.32286	-1.684	3
Chordc1	0.061387	0.84607	4	0.97252	-3.7254	0	0.73411	-0.91447	1	0.45255	-0.58216	2
CTRLHS_57315	0.061605	1.3464	1	0.10428	0.41348	1	0.10694	1.127	1	0.59331	-0.67701	0
Sdf2	0.061611	0.45131	4	0.9674	-4.2929	0	0.9694	-7.0324	0	0.12645	-0.83514	2
U2af2	0.061806	0.51453	4	0.9048	-6.8685	0	0.34497	-0.91802	1	0.84357	-1.7312	0
Cdh26	0.06183	-1.9958	1	0.63818	-2.1096	0	0.7961	-3.9527	1	0.39302	-0.94813	3
Uhrf2	0.06187	-0.6949	2	0.36452	-0.60951	1	0.3855	-0.84878	2	0.70874	-1.2166	1
Vnn1	0.061959	0.62556	4	0.19053	-0.9282	1	0.097623	-0.52821	2	0.28429	0.21968	3
Csf1	0.061994	-2.1442	2	0.26621	-7.1935	2	0.56529	-1.9004	1	0.87504	-2.117	0
Slc39a1	0.06207	1.3274	3	0.63562	-1.2215	0	0.01645	0.90284	3	0.073916	0.75204	3
Acot1	0.062211	0.97661	4	0.82708	-7.5039	0	0.65232	-1.8264	1	0.75407	-1.6385	1
Ifnab	0.062222	0.59974	3	0.5118	-1.1149	1	0.23259	-0.91841	2	0.75944	-1.1706	1
Gnpnat1	0.062233	0.37919	3	0.95638	-7.3121	0	0.26553	-1.741	2	0.40505	-1.8115	2
Ubr7	0.062438	0.45046	3	0.95119	-0.96602	0	0.16733	-0.057237	3	0.86598	-0.53987	1
Scaf11	0.062467	-0.085364	3	0.20321	-5.6869	2	0.85541	-3.0452	0	0.39181	-2.0868	2
Dmbx1	0.062487	0.90056	3	0.27327	-2.2774	1	0.82572	-1.0564	0	0.21338	-0.0040629	2
Gm12185	0.062602	-4.9386	1	0.98326	-5.6537	0	0.71134	-2.0658	1	0.5205	-0.99352	2
Actc1	0.062603	0.31174	3	0.64311	-1.2323	0	0.30035	-1.2435	2	0.63118	-0.049904	2
Ccdc141	0.062622	0.66322	3	0.88281	-3.252	0	0.97814	-2.678	0	0.55585	-0.50075	2
Pecr	0.062671	1.4214	4	0.65945	-2.1533	0	0.29524	-0.77516	1	0.016237	-0.61677	2
Cacna2d4	0.062725	0.88328	4	0.77142	-2.4216	0	0.19901	-3.1079	1	0.50452	-1.8495	1
Cacna1i	0.062814	-0.25949	2	0.089391	-4.1094	1	0.86204	-4.7191	0	0.45197	-0.29798	1
Slc26a3	0.062908	-0.82707	1	0.53569	-2.9857	1	0.17213	-2.9286	1	0.99356	-3.3057	0
Mapk1ip1l	0.063056	-0.099501	3	0.78104	-5.3626	0	0.29114	-1.7261	2	0.87498	-1.9951	0
Cdk18	0.063096	-0.28831	2	0.31105	-4.1432	1	0.6401	-1.867	1	0.37933	0.24358	3
Parvb	0.063128	-1.1863	2	0.22033	-4.6354	2	0.22349	-1.526	1	0.33237	0.18316	2
BC004004	0.063204	0.43597	3	0.27303	-3.7429	1	0.36886	-2.0015	1	0.026616	0.10464	3
Dnajc5g	0.063209	-1.9799	2	0.40148	-1.4271	1	0.90812	-3.6317	0	0.51524	-0.88244	2
Atp5g2	0.063219	1.0907	3	0.80626	-4.0253	0	0.42885	-4.9183	1	0.41091	-0.61278	1
Chd1	0.063304	-0.52362	2	0.01357	0.097069	2	0.33833	-3.598	2	0.077785	-0.46936	2
Hoxb7	0.063343	0.27198	3	0.88132	-5.6768	0	0.40711	-5.8214	1	0.37369	-0.8341	1
Ctnnb1	0.063376	-0.59313	2	0.23767	-0.35533	2	0.08233	-2.3581	1	0.78352	-0.043302	1
Hrasls5	0.063601	0.59191	4	0.82888	-1.4546	0	0.039795	0.45869	4	0.049447	0.85856	4
Cdca5	0.063607	0.55942	4	0.32919	-7.2839	1	0.50607	-1.9947	1	0.30772	-1.8652	1
CTRLHS_57916	0.063667	2.3027	1	0.28298	-1.2603	0	0.26021	0.062956	0	0.70234	-7.0433	0
B4galt7	0.063697	1.0846	3	0.86058	-2.9065	0	0.77503	-2.3869	0	0.50658	-0.5304	1
Adam33	0.063699	0.41312	4	0.39939	-0.034729	1	0.023601	-0.60813	2	0.39571	0.18329	2
Gpr56	0.063779	-0.7912	2	0.27851	-1.1388	2	0.88113	-3.2926	0	0.11558	0.11834	3
Zfp362	0.063822	0.27121	3	0.63424	-5.5322	0	0.54929	-1.2154	1	0.79392	-0.52213	1
Hspa2	0.063833	-1.1487	2	0.18253	-4.0973	2	0.47414	-1.9118	2	0.21526	0.1069	3
Rbm42	0.063845	0.51597	4	0.86939	-4.5146	0	0.33396	0.055338	2	0.85914	-1.0445	0
Creb3l1	0.063847	0.28073	3	0.90689	-4.2608	0	0.72104	-2.1313	1	0.9476	-3.0092	0
Rragd	0.063848	0.83397	4	0.55143	-1.899	1	0.47638	-2.4003	2	0.10524	0.038931	3
Grm3	0.063866	0.63109	4	0.29333	-0.49227	2	0.75486	-0.59104	1	0.31633	-0.27121	2
Sema5a	0.06397	1.3475	3	0.81051	-7.5918	0	0.69986	-5.1439	1	0.89818	-2.5557	0
Mrps5	0.063974	-2.0859	1	0.86249	-1.8147	0	0.2702	0.26025	3	0.7717	-1.9216	1
Aatk	0.064149	0.47626	3	0.022059	-0.91145	2	0.45724	-1.5062	2	0.47571	-0.54718	1
Ptprk	0.064162	-0.57513	2	0.24201	-0.31709	2	0.087939	0.64854	3	0.24669	0.25663	3
Cdc26	0.064245	0.805	4	0.19173	-7.3115	1	0.65663	-1.8641	1	0.77854	-2.672	1
Fry	0.0643	-0.16367	2	0.96278	-3.6682	0	0.19188	-2.0502	1	0.69109	-1.5699	1
B3gnt1	0.06431	-7.3417	1	0.55584	-4.1964	0	0.93702	-1.8634	0	0.42813	-0.70908	2
Pgcp	0.064316	0.62244	4	0.086835	-0.55224	3	0.49741	-1.8657	2	0.14854	0.46823	4
Copg	0.064406	0.86056	4	0.94203	-7.4126	0	0.40308	-0.444	2	0.060745	0.53514	4
Orm2	0.064449	-1.8877	2	0.51561	-1.3896	1	0.99788	-5.9545	0	0.25403	-1.4153	2
Slc25a2	0.064456	-0.72497	2	0.0064715	-1.697	2	0.6287	-0.76851	1	0.13671	0.5598	3
CTRLMM_66425	0.064462	1.7843	1	0.23514	-0.38485	0	0.28944	-0.19009	0	0.51042	-0.86935	0
4930578I06Rik	0.064463	1.5229	3	0.13253	-2.4553	2	0.60316	0.0069401	1	0.63694	-1.3888	1
Rps6ka3	0.064584	0.43638	3	0.039238	-2.1619	2	0.71623	-0.28741	1	0.083608	-0.33427	2
Ppm1e	0.064721	-0.66658	2	0.38567	-5.1544	1	0.94626	-4.0686	0	0.36752	-0.30328	3
Prkag2	0.064729	0.8905	3	0.0045036	0.88524	4	0.9056	-2.1191	0	0.046432	-1.0876	1
Ccl1	0.064823	1.8462	1	0.75394	-4.6575	0	0.2698	-0.041162	0	0.38335	-0.23378	0
Gbf1	0.064846	0.26242	3	0.057596	-0.1139	3	0.48372	-0.22598	2	0.23239	-1.196	2
Ifi27l2a	0.064883	-0.85366	1	0.39155	-2.1826	1	0.66679	-2.6026	0	0.17562	0.16806	2
Puf60	0.065063	1.6329	2	0.074653	-1.2661	1	0.43437	-2.8152	0	0.0023132	1.3911	1
Slc25a46	0.065067	0.9079	4	0.49616	-4.3028	1	0.58612	-1.7268	1	0.6436	-1.4813	1
Sp5	0.06508	0.68659	4	0.70057	-0.59812	0	0.54811	-2.201	1	0.99353	-2.384	0
Myl6	0.065106	-0.63713	2	0.51226	-3.0151	1	0.47145	-0.25026	2	0.98999	-3.3641	0
Tagap	0.065107	0.54855	4	0.84374	-2.0192	0	0.50177	-4.9043	1	0.2288	-2.1534	2
Pramel7	0.065121	0.65413	4	0.65469	-1.0494	0	0.79446	-1.0485	1	0.31209	-0.13441	2
Ptbp1	0.06515	1.0124	4	0.85345	-3.4495	0	0.42565	-2.7582	1	0.57524	-3.3062	1
Prol1	0.06522	0.88081	4	0.27373	-0.58631	2	0.44255	-2.4259	1	0.094554	0.69242	4
Arl16	0.065266	-0.93324	1	0.44413	-5.2488	1	0.83769	-3.2284	0	0.53523	-2.1597	2
Fam154a	0.065321	0.58276	3	0.25305	-4.4393	1	0.75166	-1.0281	1	0.28449	-0.16451	3
Pigx	0.065343	-2.132	2	0.77895	-6.4145	0	0.65367	-4.8409	1	0.38497	-1.8712	2
Ptpn7	0.065357	0.82799	4	0.73489	-3.9999	0	0.21643	-1.2365	3	0.81441	-0.14564	1
Ivns1abp	0.065372	0.90052	3	0.20687	-3.6695	2	0.88772	-4.1769	0	0.29329	0.2318	3
Shisa3	0.065423	0.6915	3	0.067809	-0.85467	2	0.17442	-1.9416	3	0.64089	-2.0441	2
Shroom3	0.065567	-0.80746	2	0.017821	0.4388	3	0.88278	-2.0976	0	0.13232	-0.64221	2
Nat1	0.065733	-1.7856	3	0.28911	-1.4758	1	0.74596	-1.004	1	0.078401	0.47349	3
Caml	0.065804	0.34971	4	0.76149	-1.4056	0	0.31302	-1.2352	1	0.58133	-1.5509	1
Krtap6-2	0.065849	1.4849	2	0.28856	-1.3099	1	0.16311	-0.70352	1	0.75691	-8.2108	0
Ifi205	0.065873	-0.051036	2	0.13113	-0.47321	1	0.8011	-1.084	0	0.11169	0.096815	3
Hpcal4	0.065928	1.094	3	0.90404	-2.6726	0	0.28956	-1.3274	1	0.13799	-2.8167	1
1700019O17Rik	0.065952	-0.17276	3	0.35181	-1.5379	1	0.11077	0.045069	3	0.42405	-0.9461	2
Guca1a	0.06606	0.64811	4	0.18888	-1.7225	1	0.16928	-1.5711	1	0.60141	-0.639	2
CTRLMM_67104	0.066153	1.7626	1	0.064165	1.0435	1	0.73539	-3.4689	0	0.099897	1.3361	1
Thoc3	0.066159	1.4093	2	0.0026149	0.25397	2	0.56822	-0.27818	0	0.85189	-3.4118	0
Dstyk	0.066184	-0.28977	3	0.1989	-1.0746	1	0.17602	-0.83185	2	0.34228	0.01773	3
Tespa1	0.066195	-0.56394	3	0.42709	-2.4078	1	0.63031	-2.051	1	0.20101	0.13154	3
Chek1	0.066199	-0.73849	2	0.17209	-2.311	2	0.18162	-1.5665	2	0.54257	0.23352	2
Sp2	0.066249	-0.22447	3	0.40197	-0.53282	1	0.41589	-1.1108	1	0.89493	-1.1941	0
Pcdhb11	0.066277	0.72936	4	0.67758	-2.5037	0	0.36033	-4.037	2	0.64247	-1.1888	2
Gm4763	0.066283	0.35452	4	0.111	-5.5888	1	0.51365	-5.2566	1	0.60057	-3.1154	1
Gm6460	0.066365	1.7254	2	0.81254	-6.8195	0	0.7941	-6.0052	0	0.0015414	-1.816	1
Fli1	0.066434	1.3903	3	0.95329	-5.5765	0	0.60659	-2.8266	1	0.84444	-0.74766	0
Ucp3	0.066511	0.40322	4	0.30215	-1.4417	1	0.78568	-4.5886	0	0.95619	-1.2884	0
B3galt4	0.066531	-2.5138	1	0.82649	-4.4629	0	0.71256	-1.4024	1	0.51881	-1.144	2
Irak4	0.066548	0.45238	3	0.71792	-2.1527	0	0.18739	-2.2046	3	0.61138	-0.19227	2
Traf3ip1	0.066593	0.65666	4	0.90942	-7.1426	0	0.50824	-1.8319	1	0.2207	-1.8474	1
Fem1a	0.066718	0.6275	4	0.83207	-2.0566	0	0.41351	-0.60281	2	0.10536	0.48023	4
Rnf222	0.06675	-1.228	2	0.040659	-0.82118	2	0.49265	-0.6331	2	0.86485	-1.6612	1
Elovl3	0.066832	-4.2586	2	0.70319	-2.9479	0	0.46469	-2.6209	1	0.0092029	-0.33561	3
Syngr1	0.066832	1.0626	3	0.96567	-3.5459	0	0.0090348	0.25346	2	0.8907	-1.0396	0
Aqp8	0.066867	0.87481	4	0.05012	-2.271	2	0.87354	-1.3912	0	0.31832	-0.11986	2
Vrk2	0.066914	0.4944	4	0.024051	-1.4599	1	0.18537	0.22548	3	0.45405	-0.26195	2
Fam109a	0.066945	-6.9425	1	0.51337	-2.6919	0	0.54102	0.23351	1	0.26426	0.41319	2
3110001D03Rik	0.067204	1.7008	2	0.30341	-1.6544	1	0.91749	-5.3828	0	0.34962	-3.9756	1
Galnt13	0.067244	-0.61851	3	0.46088	-3.05	1	0.16046	-1.0305	2	0.76398	-0.75571	1
Krba1	0.067246	0.96836	4	0.78409	-2.95	0	0.41524	-3.0116	1	0.58627	-0.87188	2
Ap1g2	0.067268	-1.473	1	0.36289	0.0016845	1	0.90885	-3.8585	0	0.74591	-3.2685	1
Vmn2r51	0.067414	-0.56116	2	0.38438	-2.5086	1	0.82088	-1.6714	0	0.12613	-1.1056	3
Mcm9	0.067471	0.71776	4	0.025425	-3.764	2	0.26156	0.016185	3	0.98767	-3.2027	0
Cela1	0.067552	-0.61434	1	0.86498	-2.2051	0	0.20346	-1.2694	1	0.052995	-0.43591	1
Rad23a	0.067567	0.63507	4	0.84389	-3.2387	0	0.33648	-3.6573	2	0.35864	-1.11	2
Pirt	0.067593	-0.63713	3	0.83674	-4.5077	0	0.49299	-1.5644	2	0.070234	0.33724	3
Flt3l	0.067693	1.7296	2	0.47685	-2.4395	0	0.43079	-1.1775	1	0.41168	-0.2924	1
Ube2w	0.067696	-0.30425	2	0.73814	-1.1734	0	0.8246	-2.3844	0	0.76789	-0.56644	0
Pgc	0.067834	0.44904	3	0.35279	-7.3242	1	0.14966	0.050665	3	0.47338	-1.5105	2
Fgf5	0.067851	0.75648	4	0.38833	-2.4354	1	0.33713	-2.0682	2	0.034014	0.90543	5
Nxn	0.067884	0.062987	3	0.53037	-1.3969	1	0.51282	-0.19538	1	0.78265	-1.1727	1
Dna2	0.067909	-1.2014	2	0.13247	-0.16599	2	0.30904	-0.79376	2	0.90876	-1.4697	0
Dgcr2	0.067931	-1.191	1	0.3978	-1.9427	1	0.83874	-2.2285	0	0.94525	-2.6814	0
Traip	0.06805	0.83176	4	0.37302	-1.2041	1	0.16194	0.26285	3	0.34956	-2.4216	1
Meiob	0.068059	-1.0101	2	0.59066	-0.99972	0	0.49871	-0.45403	1	0.073683	0.078165	2
Toe1	0.068088	-0.44349	3	0.034759	-1.4032	3	0.67325	-1.7498	1	0.11478	0.7377	4
Pdk4	0.068168	0.51053	4	0.3354	-0.74222	1	0.23369	-1.0686	2	0.10926	-0.51747	2
Pet2	0.068347	0.73842	4	0.19597	-0.6526	2	0.72415	-1.2873	1	0.26273	0.16634	3
Amigo3	0.06835	1.204	3	0.67777	-7.0427	0	0.72582	-4.9975	1	0.73137	-0.98993	1
Dlx1	0.068381	1.0551	3	0.77575	-5.4047	0	0.652	-2.0517	1	0.59188	-3.8945	1
Agt	0.06847	-0.63861	2	0.72254	-7.4866	0	0.40051	0.088929	2	0.19916	-4.4774	2
Arhgap22	0.068482	1.2402	3	0.2132	-2.801	1	0.59337	-3.0933	1	0.56666	-1.0924	1
Samd1	0.068803	0.8175	3	0.67029	-7.6016	0	0.49917	-0.87343	1	0.54362	-0.44971	2
Kbtbd10	0.068809	0.82252	4	0.75253	-2.3925	0	0.61699	-3.1127	1	0.90075	-0.88002	0
1110007C09Rik	0.068912	1.0661	4	0.8862	-3.1873	0	0.85076	-1.4886	0	0.17496	-0.47699	2
Krt4	0.06892	-1.2648	2	0.71515	-1.9416	0	0.023741	1.1883	4	0.38352	-0.019299	3
Tbrg4	0.06896	0.80711	3	0.8754	-7.2472	0	0.67339	-1.4654	1	0.55166	-4.3322	1
Hist3h2a	0.069013	-0.48678	2	0.381	-2.8033	1	0.47179	-1.7983	2	0.33538	-0.88198	2
Zfp451	0.069071	1.3434	3	0.38674	-1.0223	1	0.85254	-7.9865	0	0.24025	0.44214	3
Vezt	0.069134	0.73563	4	0.5181	-0.84173	1	0.32208	-1.3188	2	0.3254	0.021458	3
Stat5b	0.069158	-2.7395	1	0.68881	-1.394	0	0.84636	-2.9765	0	0.27367	-0.047885	3
Vmn1r77	0.06921	-1.4954	1	0.36668	-1.5992	1	0.17524	0.55828	2	0.35644	-0.41706	1
CTRLHS_57083	0.069224	1.7186	1	0.90116	-8.2505	0	0.20351	0.50994	1	0.70248	-2.014	0
Lgals7	0.069292	-1.4361	2	0.86845	-3.4021	0	0.13923	0.59256	3	0.27853	0.34774	3
Thbd	0.069389	1.0434	3	0.46214	-0.98728	1	0.0049885	1.9498	3	0.61236	-1.2634	1
Upf3a	0.069462	0.11864	3	0.84315	-2.9423	0	0.72833	-1.1107	1	0.108	0.092739	3
Gli3	0.069481	-1.8852	2	0.77773	-4.585	0	0.28163	0.17357	3	0.79919	-2.0499	1
Bex4	0.069511	0.4741	3	0.15356	-1.3128	1	0.65238	-0.42131	1	0.25206	-0.49203	2
Abl2	0.069587	-1.073	2	0.021931	-0.52663	2	0.21916	-0.26778	3	0.48177	-1.7435	2
Usp20	0.069619	-1.6516	1	0.72385	-1.9963	0	0.42005	-2.9392	2	0.54525	-0.45724	2
Tmem18	0.06962	0.46432	3	0.48973	-2.4872	1	0.58257	-2.21	1	0.3275	0.15646	3
Gm12597	0.069674	-0.21382	2	0.78217	-3.7108	0	0.90083	-2.9372	0	0.68617	-4.4301	1
Ftl1	0.069751	0.87376	3	0.92219	-7.119	0	0.34512	-1.6968	1	0.9947	-7.6064	0
Igfbp3	0.069776	0.586	4	0.49696	-3.7339	0	0.96135	-3.7099	0	0.91761	-1.5397	0
Tmem120b	0.069857	-0.076086	2	0.59651	-4.5333	0	0.41958	0.046716	2	0.44424	-0.70698	2
Sdr9c7	0.069873	-2.1544	2	0.6581	-4.8044	0	0.90766	-2.3746	0	0.8768	-3.6521	0
Sppl3	0.069948	1.3864	3	0.28394	-0.69404	1	0.89824	-4.8584	0	0.88832	-2.182	0
Smap2	0.070007	-0.36043	1	0.6276	-6.2214	0	0.11539	-0.48444	2	0.30973	-0.33237	2
Fgf8	0.070008	0.83256	3	0.52265	-1.281	0	0.23159	-1.5099	2	0.38396	-0.33238	1
Csnk1a1	0.070028	1.2969	3	0.9413	-7.3491	0	0.84722	-2.2069	0	0.25989	0.40521	3
Frem2	0.070084	0.60607	4	0.83913	-8.1959	0	0.60186	-0.57038	1	0.46414	0.018596	2
Mobp	0.070099	-1.1484	2	0.36684	-3.1538	1	0.25495	-1.7437	2	0.50275	0.057181	2
Bpifb1	0.070139	0.53473	4	0.35356	-0.88484	1	0.95521	-3.4271	0	0.47052	-0.37849	2
Chil6	0.070162	-2.8682	2	0.89752	-6.2686	0	0.25076	-0.8846	2	0.30923	-1.95	1
Dnase2a	0.070184	0.93919	4	0.3058	-1.9367	1	0.28501	-0.25965	3	0.093118	-0.8571	3
Vmn1r4	0.070199	-1.7582	2	0.82502	-1.6002	0	0.29235	-0.43382	2	0.13403	0.19255	2
Ift27	0.070276	0.96595	4	0.25431	-0.30595	2	0.18573	0.2855	3	0.4792	-2.5804	2
Gm5142	0.070294	0.54715	3	0.61087	-6.4244	1	0.88321	-2.5588	0	0.76181	-0.91823	1
Tinf2	0.070331	-2.4788	2	0.79826	-7.2636	0	0.94846	-3.0694	0	0.91065	-1.4685	0
Tmed8	0.070362	0.22841	3	0.74123	-3.1261	0	0.57292	-3.6852	1	0.51379	-0.41174	2
Pip5k1a	0.070408	1.1615	4	0.080024	-5.8567	1	0.93349	-2.7238	0	0.16603	0.50848	3
Spg20	0.070449	0.11688	3	0.24255	-0.7043	2	0.088018	-0.61545	3	0.64113	-0.26996	2
Psmc2	0.070475	1.2837	2	0.21154	-0.97738	1	0.059922	1.5802	2	0.068462	1.7699	2
Nckap1l	0.070603	0.25089	2	0.43557	-0.37651	1	0.90364	-5.0152	0	0.41124	-0.078059	2
Tspan10	0.070663	-1.1849	2	0.70513	-1.4868	0	0.30823	-3.9379	2	0.88765	-3.3611	0
Slc11a1	0.070673	-1.2595	2	0.22981	-1.7227	2	0.48699	-2.8608	1	0.28446	-1.6419	1
Krtap4-8	0.070709	1.8514	2	0.81046	-7.3039	0	0.18325	0.71005	2	0.065357	1.5735	2
Slc5a6	0.070739	0.39564	4	0.33835	-2.9716	1	0.92847	-3.8431	0	0.79638	-1.5953	1
Trem2	0.070746	0.28646	3	0.47044	-0.16757	1	0.37969	-1.6924	2	0.84764	-0.52353	1
Vmn1r69	0.070836	0.66447	4	0.88017	-2.0381	0	0.26516	-4.8901	2	0.54193	-0.19239	2
Sf3a1	0.070846	0.97488	3	0.72695	-5.6474	0	0.064783	-0.30499	2	0.98663	-5.6076	0
Prom1	0.070851	-0.16684	2	0.66977	-2.7235	0	0.15232	-0.76628	3	0.71898	-2.2947	1
Zfp185	0.070856	0.32317	4	0.65939	-0.85369	0	0.96864	-4.8924	0	0.61817	-6.1408	1
Tmem17	0.070879	0.68839	4	0.39307	-0.0076707	1	0.53634	-1.2576	1	0.88959	-0.80243	0
Sfn	0.07089	0.83056	4	0.30624	-7.5557	1	0.6749	-1.1099	1	0.12928	0.88521	3
Acap1	0.070893	-0.21416	2	0.95628	-4.1556	0	0.10162	0.16314	3	0.3584	-0.26862	3
Spint3	0.070896	-0.13567	2	0.7908	-2.7621	0	0.36478	-0.5679	1	0.31339	-0.50225	2
Gtf3c3	0.070984	0.75237	4	0.67973	-1.1894	0	0.65206	-2.0245	1	0.52834	-0.62715	2
Ahnak	0.071002	0.027612	2	0.050827	-0.87478	2	0.89107	-5.9398	0	0.99008	-1.8163	0
Nkx3-2	0.071017	0.92604	3	0.58733	-2.3216	1	0.053736	-1.5885	1	0.25599	-1.5182	1
Gbx1	0.071158	0.89019	3	0.8299	-1.8402	0	0.37473	-5.9505	1	0.11954	0.7298	3
CTRLHS_57661	0.071163	1.5707	1	0.34427	-0.88466	0	0.94204	-5.2446	0	0.68865	-1.5133	0
Ptpn22	0.071206	-0.33956	2	0.97478	-2.5333	0	0.71261	-0.90895	1	0.62854	-0.61929	2
CTRLHS_57396	0.07146	2.2265	1	0.49052	-6.8082	0	0.19604	0.86486	1	0.69543	-7.001	0
Fbxo27	0.071501	0.74537	4	0.16086	-3.3586	1	0.8164	-2.2438	0	0.12694	0.71536	3
Tmem176b	0.071556	0.85227	4	0.78288	-1.5815	0	0.72059	-2.2629	1	0.72683	-1.6137	1
Prame	0.071587	0.82162	4	0.5128	-0.44275	1	0.048883	0.86915	3	0.87032	-0.27081	1
Ift74	0.071601	0.93693	4	0.061851	-2.4832	2	0.77104	-2.3843	1	0.092897	0.62608	3
Ncdn	0.071628	0.5085	4	0.1637	-1.1318	2	0.39805	-1.234	2	0.28302	-1.1074	2
Ccndbp1	0.071654	0.24838	3	0.17388	-3.0803	2	0.59408	-2.2182	1	0.55772	-0.075259	2
Gabrr3	0.071676	0.11958	3	0.61482	-0.83393	1	0.35616	-2.1265	2	0.077925	0.4716	4
Vipr1	0.0717	0.88659	4	0.66071	-1.2578	0	0.056929	0.66076	4	0.8053	-1.4229	1
Atf7ip2	0.071725	-1.0271	2	0.84744	-4.9655	0	0.31201	-4.7019	2	0.87993	-0.85062	0
Dcp1a	0.071753	0.74834	4	0.69258	-4.2542	0	0.14298	-0.22871	2	0.58204	-0.85646	2
Actg2	0.07182	1.3688	3	0.1602	-0.49811	2	0.39077	-0.66934	2	0.8229	-1.8949	0
Sec14l3	0.071827	-1.0952	2	0.94978	-4.1314	0	0.2813	-4.6499	1	0.84743	-2.3654	1
Fmo5	0.071839	-1.1076	2	0.084416	0.040182	3	0.78915	-3.3474	1	0.28712	-0.95683	3
Gata3	0.07185	-0.75154	2	0.11382	-7.2673	1	0.24589	-2.3437	2	0.95479	-3.4448	0
Arhgef12	0.071857	0.6121	3	0.40349	-1.9868	1	0.27508	0.15418	3	0.64174	-2.7639	2
9530002B09Rik	0.071946	1.0458	3	0.40515	-2.2193	1	0.32971	-1.2865	1	0.51189	-0.057845	2
Aqp4	0.071979	-0.40038	3	0.42689	-1.4653	1	0.66504	-2.582	1	0.85974	-1.9341	1
Catsper1	0.072043	0.9358	3	0.15204	-2.4743	2	0.20548	-1.3158	2	0.19356	-0.21813	3
Cdkn3	0.072133	0.26296	3	0.51696	-0.47048	1	0.10404	-1.5073	3	0.94971	-1.0453	0
Gm14743	0.072154	-0.75038	2	0.054309	0.11999	2	0.9224	-3.0621	0	0.067648	1.0761	3
Fbxl3	0.072271	0.68957	3	0.80142	-1.3389	0	0.77419	-2.0309	0	0.76211	-1.2213	0
Cbln1	0.072276	1.0407	4	0.51095	-3.0867	1	0.8042	-4.5217	0	0.7285	-2.5362	1
Tmem170	0.072322	-0.1945	2	0.19423	-0.76033	1	0.51824	-0.3546	1	0.16789	0.55714	3
Krt39	0.072364	0.64483	4	0.8209	-1.1497	0	0.23717	-2.1372	2	0.51558	-1.1348	2
Slc35e3	0.072409	-1.2139	2	0.52543	-3.0456	1	0.46404	-2.0109	1	0.62087	-2.5498	1
Sox3	0.072625	0.72491	4	0.43659	-2.5881	1	0.85167	-3.7423	0	0.79498	-2.3066	1
Gab1	0.072646	-0.18419	2	0.22196	-0.84221	2	0.30725	-1.4397	2	0.25337	-0.72865	3
Kcnk9	0.072746	-1.549	1	0.40157	-0.92435	1	0.49759	-1.1092	1	0.24664	-0.42882	1
Rnasel	0.072793	-0.060919	3	0.29839	-1.7533	1	0.39085	-0.45412	1	0.44457	-0.47276	2
Flnc	0.072833	-0.46165	2	0.69411	-1.8879	0	0.082845	-0.049892	2	0.67514	-3.0318	1
Pnma5	0.072859	-0.69129	3	0.63241	-1.731	0	0.74633	-1.791	1	0.55397	-0.17788	2
Srd5a1	0.072879	-1.648	1	0.15068	-1.3764	2	0.54068	-1.0807	1	0.3876	-0.39119	2
Otx2	0.072989	-0.16135	2	0.49185	-5.1749	0	0.45974	-2.7388	1	0.023975	1.2184	3
Cfhr2	0.073035	1.3106	3	0.87175	-1.7304	0	0.13302	0.48248	3	0.77602	-1.7671	1
E330009J07Rik	0.073048	-3.6679	1	0.48095	-2.1561	1	0.76043	-1.4333	1	0.56072	-1.4831	2
Caly	0.073067	0.12853	3	0.45495	-1.0049	1	0.68388	-1.1278	1	0.28142	0.13361	3
CTRLHS_57618	0.073191	1.5171	1	0.80402	-2.6942	0	0.76722	-2.3603	0	0.45374	-0.45899	0
Tbck	0.0732	0.76201	4	0.070627	-5.7457	1	0.81381	-1.1611	0	0.81538	-0.96131	1
Gm17495	0.073219	1.2453	2	0.6623	-1.2864	0	0.45997	-1.8147	1	0.14819	0.78486	2
Corin	0.073231	-0.21096	3	0.87349	-6.333	0	0.36006	-3.5157	2	0.29623	-0.90676	3
Il5	0.073236	-1.6954	1	0.18156	-0.19415	1	0.85317	-2.6676	0	0.53654	-0.054256	1
Tmem167	0.073311	1.2901	2	0.70306	-2.2772	0	0.38845	-1.9632	1	0.83232	-1.8294	0
Unc5c	0.073337	0.1888	3	0.27464	-2.9398	1	0.60194	-0.20728	1	0.00098627	1.8194	5
Slc25a25	0.073547	-1.7784	1	0.069348	-1.1106	1	0.0025847	1.3448	5	0.92827	-1.9879	0
Ttc34	0.07359	0.97245	4	0.81325	-1.7807	0	0.56381	-2.8873	1	0.72643	-0.13895	1
Rassf2	0.073604	0.96307	3	0.21725	-4.6337	1	0.046524	-6.4474	1	0.75298	-0.81775	0
Erp27	0.073624	0.87798	4	0.57957	-4.162	1	0.26204	-2.3055	1	0.42477	-0.094642	1
Eif2ak2	0.07369	0.903	4	0.13317	-2.8847	1	0.20874	-0.68168	2	0.92177	-1.8673	0
CTRLMM_66791	0.073693	2.26	1	0.46151	-6.6627	0	0.37654	-1.6462	0	0.67247	-6.8553	0
Glt28d2	0.073804	-0.93234	2	0.33617	-5.6504	1	0.89601	-3.8922	0	0.19088	-0.94378	2
Phex	0.073943	-0.077801	3	0.59267	-0.22555	1	0.22597	0.068325	3	0.049617	0.79196	4
Homer2	0.073964	1.0359	4	0.21109	-6.8992	1	0.96518	-2.7898	0	0.72849	-1.3051	1
Hmha1	0.073982	0.84257	4	0.71217	-2.0202	0	0.90584	-2.2963	0	0.31324	-0.41678	3
Oip5	0.074135	0.639	4	0.61289	-0.79494	1	0.41742	-2.7718	2	0.93137	-0.82601	0
CTRLHS_57820	0.074228	1.9911	1	0.62579	-7.3491	0	0.5753	-3.9673	0	0.79255	-7.5423	0
Chd2	0.074235	0.89453	4	0.88348	-1.9511	0	0.76561	-2.9512	1	0.88113	-1.1334	0
4930550C14Rik	0.074272	-1.4966	1	0.4185	-2.0613	1	0.61027	-3.4504	1	0.43818	-2.2437	2
9130019O22Rik	0.074306	1.5496	3	0.053153	0.33103	2	0.38725	-1.4817	2	0.54617	-1.1094	2
Dse	0.074345	0.48165	3	0.28977	-3.2384	2	0.21227	-0.0352	3	0.86772	-0.84107	1
Katnb1	0.074408	0.23138	3	0.71377	-2.033	0	0.14389	-0.688	2	0.51022	-0.44207	2
Sh2d7	0.074525	0.6274	3	0.61028	-4.2309	0	0.48675	-2.8192	1	0.93528	-3.1118	0
Arhgef38	0.074538	0.68568	4	0.8596	-2.7933	0	0.66875	-2.3637	1	0.015712	1.2368	4
CTRLHS_57184	0.074571	1.6852	1	0.13214	0.38676	1	0.80365	-4.4303	0	0.40246	-0.31267	0
Akr1b3	0.074936	1.3084	3	0.54646	-5.9939	0	0.58107	-4.8291	1	0.90766	-2.3203	0
Rrh	0.074967	0.36834	3	0.32148	-0.84032	2	0.62904	-1.3364	1	0.35232	-0.87978	2
Rabep1	0.075049	-0.83012	2	0.60503	-6.2767	1	0.9152	-4.4006	0	0.43473	-1.8777	1
CTRLHS_57584	0.075158	1.4443	1	0.45071	-1.203	0	0.98561	-6.8549	0	0.45449	-0.4316	0
Hist1h1t	0.075193	-1.1884	2	0.26841	-0.2807	1	0.90148	-2.8809	0	0.012242	1.4105	4
Pelp1	0.075303	1.0542	4	0.31462	-2.0748	2	0.39752	-0.61428	2	0.89997	-0.92698	0
Il13ra1	0.07532	0.32661	3	0.2022	-2.6942	1	0.41595	-2.3096	2	0.4405	-1.062	1
Rbm31y	0.075339	-7.0979	1	0.93177	-3.0735	0	0.81597	-5.5773	0	0.33504	-1.2892	1
Gcm2	0.075352	-2.199	1	0.20828	-1.6491	2	0.47102	-4.2632	1	0.20385	-0.090178	3
Ptgr1	0.075385	0.51987	2	0.079381	0.41367	2	0.43836	-1.2757	1	0.48073	-1.1645	1
Sema3a	0.075421	0.76955	4	0.70474	-2.0095	0	0.24385	-0.58956	3	0.81188	-0.23276	1
Nlrp9a	0.075507	0.70727	4	0.82515	-1.9068	0	0.36719	-1.5908	1	0.066851	0.72026	4
CTRLHS_57050	0.075515	1.426	1	0.21967	-0.2103	0	0.84082	-2.369	0	0.62016	-1.0251	0
Ube2l3	0.075664	1.1403	3	0.9081	-7.1699	0	0.74903	-0.43278	0	0.84639	-3.6107	0
Cyp11b1	0.075674	0.70781	4	0.84078	-1.735	0	0.07456	0.5413	4	0.28719	-0.49971	3
Gnb1	0.075697	0.97717	4	0.65496	-4.9329	0	0.90544	-3.04	0	0.45809	-0.29752	2
Creb1	0.075878	0.78652	4	0.88907	-1.7848	0	0.78795	-2.7328	1	0.63741	-1.0803	1
Rnf214	0.075906	0.61476	3	0.96036	-3.3074	0	0.63386	-1.3233	1	0.86848	-0.60536	1
Tfec	0.075954	0.56253	3	0.34192	-1.3209	1	0.26603	-0.57716	2	0.97554	-0.85572	0
Ociad2	0.075966	-4.8787	1	0.75695	-2.0523	0	0.45282	-1.6444	2	0.6989	-1.0722	1
Rrn3	0.075975	-6.7787	1	0.005241	1.5675	3	0.38073	-0.42429	2	0.11795	-0.16986	2
Hrsp12	0.07601	1.3698	2	0.6359	-8.0289	0	0.66112	-3.4778	0	0.30813	-2.4085	1
Tlk1	0.076031	0.03723	3	0.21876	-1.6739	1	0.43653	-1.6667	2	0.9456	-2.2086	0
Chd4	0.076063	0.96522	4	0.99546	-7.2514	0	0.8242	-1.923	0	0.49898	-2.3183	2
Lyzl4	0.076126	-0.95049	2	0.65886	-1.5633	0	0.84052	-2.5748	0	0.70653	-2.4851	1
Zfp282	0.076146	1.0364	4	0.50229	-2.3543	1	0.77444	-4.6847	1	0.60761	-0.34399	2
Dnajc15	0.076267	0.065208	3	0.53341	-1.416	1	0.032191	0.89157	4	0.42509	-0.43237	2
Dcstamp	0.076374	0.80703	4	0.93758	-4.1496	0	0.61591	-1.1473	1	0.43206	-1.0029	1
Zfp92	0.076423	-0.091273	2	0.24841	-0.90608	2	0.43325	-0.67041	2	0.17602	0.10368	3
Nipsnap3a	0.076479	0.65037	4	0.74023	-6.373	0	0.019967	-0.77644	2	0.32609	0.2717	3
Heatr5b	0.076587	-1.2653	2	0.77872	-1.5994	0	0.040455	0.0020878	3	0.26916	0.31234	3
Myl9	0.076624	0.42183	4	0.48769	-0.68597	1	0.94518	-4.3584	0	0.69373	-3.4283	1
Bpifa3	0.076665	0.20162	2	0.59179	-2.5154	1	0.51228	-0.31226	2	0.20532	-0.95915	2
Saal1	0.076715	-2.433	1	0.98495	-7.5381	0	0.28869	-1.6631	1	0.2911	-0.54323	1
Cog6	0.076736	0.9646	3	0.063206	-0.29826	2	0.33554	-1.621	1	0.79509	-0.73992	1
Vmn1r178	0.076878	0.014814	3	0.89015	-3.016	0	0.41548	-2.2587	2	0.056482	-3.9178	2
Zfp623	0.076894	0.82581	4	0.70733	-1.8712	0	0.44509	-1.8975	2	0.54387	-0.34347	2
Nf2	0.076901	0.91286	3	0.3976	-0.9175	1	0.20704	-0.19707	2	0.66778	-0.27617	1
Rundc3a	0.076953	0.88629	3	0.050944	0.32307	3	0.56945	-4.1878	1	0.8342	-1.2508	0
1700123K08Rik	0.077059	-0.28891	2	0.91758	-4.4488	0	0.11692	-1.4369	1	0.93943	-1.2176	0
Lcat	0.077065	-0.023516	3	0.64581	-6.3642	0	0.96492	-4.3095	0	0.75597	-0.4949	1
Stx16	0.077135	0.97477	4	0.021057	-0.050381	3	0.3724	-0.54697	1	0.85279	-1.3434	1
Clasp1	0.077144	0.80781	4	0.80784	-4.2347	0	0.84757	-1.8563	0	0.45666	-1.8834	2
Ankrd45	0.077162	0.964	4	0.047936	-5.4558	2	0.49919	-2.8989	2	0.14164	-1.2677	2
Abat	0.077181	0.7304	4	0.5146	-0.39734	1	0.84756	-1.5327	0	0.6824	-1.6933	1
C130074G19Rik	0.077244	-0.75114	2	0.8459	-2.524	0	0.72202	-6.4533	1	0.29438	-0.54961	2
Thtpa	0.077328	-2.6515	2	0.56579	-3.9807	1	0.61795	-2.0419	1	0.86579	-0.86711	1
Dnahc17	0.07739	-0.13927	3	0.90166	-2.024	0	0.064093	0.52413	4	0.39243	-0.56675	1
Col5a3	0.077464	0.99394	3	0.18828	-1.4816	1	0.75718	-3.2747	0	0.44358	0.14629	2
Utp14b	0.077474	0.63418	4	0.80442	-2.1263	0	0.18634	-1.8537	1	0.12443	0.57109	4
Tead4	0.077711	0.74201	4	0.085652	-0.30097	3	0.089875	-1.1703	3	0.1501	0.61359	4
Mcph1	0.077759	-0.48305	3	0.30854	-0.50207	2	0.51057	-1.269	2	0.65808	-0.70061	2
Dgkz	0.077849	0.71277	4	0.21413	-1.8323	2	0.55039	-0.55132	2	0.99374	-1.273	0
S100a5	0.077884	-0.93609	2	0.3798	-3.5025	1	0.66323	-2.1132	1	0.55628	-1.6663	1
Farp2	0.077921	-2.4465	1	0.76598	-6.8562	0	0.92564	-4.8107	0	0.20048	0.42546	3
Kansl1l	0.077924	0.16035	3	0.45287	-1.5675	1	0.16735	-0.038704	3	0.48816	-0.83203	1
Sp9	0.078025	0.68862	2	0.6722	-2.2783	0	0.023748	1.5986	3	0.53127	-0.93175	1
Cacna2d3	0.078074	-2.0186	2	0.93791	-2.4508	0	0.31029	-0.68552	2	0.024525	0.57129	3
Adck5	0.078086	0.79501	4	0.55214	-0.56458	1	0.55982	-0.051941	2	0.67717	-0.83063	2
Magea4	0.078089	0.72142	3	0.58115	-1.0902	1	0.95886	-2.2287	0	0.79255	-1.0798	1
CTRLHS_57614	0.078262	1.4971	1	0.32638	-0.78861	0	0.94565	-5.2381	0	0.19596	0.64252	1
Atp6ap1l	0.078362	0.81724	3	0.07598	-0.26423	2	0.10202	-0.83477	1	0.26146	-0.011038	2
Jak2	0.078514	-0.21882	2	0.75237	-0.57716	0	0.61949	-1.3494	1	0.79847	-0.98524	1
Btbd16	0.078559	0.32246	3	0.94291	-6.021	0	0.90976	-2.4619	0	0.12235	-0.24488	2
Lepr	0.078665	0.55012	3	0.76725	-7.3625	0	0.76904	-2.7704	0	0.72846	-1.1786	1
Clasrp	0.078722	-0.25243	3	0.58971	-7.4404	0	0.55575	-3.0472	2	0.58224	-1.1142	2
Ildr1	0.078749	0.91705	3	0.36988	-2.286	1	0.097406	0.30875	3	0.47038	-0.90028	1
Atp10a	0.078787	0.24019	3	0.75583	-1.6303	0	0.84807	-1.6431	0	0.81242	-1.728	1
Otop3	0.078851	1.3531	3	0.73822	-2.4189	0	0.19453	-2.9254	2	0.52977	-0.41828	2
Lrp4	0.078915	1.1466	3	0.81655	-7.3355	0	0.94253	-2.1694	0	0.69189	-0.51915	1
Scaper	0.078927	1.0922	3	0.99763	-8.0766	0	0.56662	0.17306	1	0.28916	0.23693	3
1700029P11Rik	0.078933	0.59023	3	0.36236	-2.3693	1	0.32471	-1.982	2	0.10472	0.99518	3
Klk15	0.079011	1.0938	3	0.21888	-0.46257	1	0.16513	0.37632	3	0.77105	-2.9994	1
Cnpy4	0.079021	0.53249	4	0.73907	-1.9286	0	0.92438	-5.4003	0	0.32144	-1.3108	2
Defb43	0.079136	1.1305	2	0.7678	-3.8708	0	0.91582	-4.5968	0	0.52855	-1.444	1
Asb18	0.079171	-1.0242	2	0.98657	-4.3321	0	0.26967	-3.2434	1	0.97386	-1.225	0
Slc22a6	0.079287	1.2926	3	0.60469	-3.7748	0	0.61918	-2.9966	1	0.62812	-1.838	1
Bloc1s1	0.079597	1.0147	4	0.52466	-5.5855	0	0.79107	-1.7916	1	0.12821	-1.5166	1
Gna12	0.079624	-0.74345	2	0.63931	-1.4721	0	0.59041	-1.8399	1	0.087791	0.60611	4
Gstt4	0.079763	-0.50408	2	0.87217	-1.1972	0	0.56123	-0.75049	2	0.96417	-1.3035	0
Ankrd55	0.079845	0.77104	4	0.89916	-2.7634	0	0.89495	-1.4989	0	0.71634	-1.6697	1
Pigc	0.079846	-0.8221	2	0.25705	-0.1579	2	0.3605	-0.29691	2	0.55159	-0.2424	1
Hoxd11	0.079873	-0.53374	2	0.65404	-6.7432	0	0.036182	-0.11938	2	0.43289	-2.642	1
Ing4	0.079906	-1.0654	3	0.16684	-1.0139	2	0.046106	-1.0503	2	0.76195	-1.8195	1
Enpp3	0.079922	0.67487	4	0.077544	-2.7139	3	0.2836	-0.70151	3	0.55437	-3.2515	1
Mmp13	0.079961	-1.5006	3	0.36918	-1.5766	1	0.32246	-3.5408	1	0.25292	0.048376	3
Adam11	0.07997	1.206	3	0.12594	-1.0896	2	0.27642	-1.3053	2	0.88201	-3.1829	0
Smim8	0.080009	0.94904	2	0.77281	-2.1722	0	0.20681	-0.0038421	1	0.98648	-4.8445	0
Nhp2l1	0.080061	1.8492	1	0.6905	-7.5643	0	0.040679	2.6898	1	0.39363	-0.33966	0
Fbxw18	0.080071	-1.236	2	0.99467	-7.4971	0	0.00043478	1.9981	6	0.76853	-1.566	1
A530016L24Rik	0.080097	-1.498	2	0.72847	-4.8321	0	0.47929	-0.4665	1	0.9649	-6.3034	0
CTRLHS_57039	0.08011	1.5431	1	0.85277	-4.1654	0	0.052688	2.1407	1	0.52673	-0.84948	0
Dbpht2	0.080209	0.085446	2	0.79523	-2.6529	0	0.067121	-0.51967	2	0.96428	-2.5382	0
Alox12b	0.080214	0.74708	3	0.69551	-2.3384	0	0.1947	-0.21854	2	0.37271	-0.57771	1
1700011H14Rik	0.08031	0.14765	3	0.2745	-1.4235	2	0.86178	-4.0981	0	0.7712	-0.13825	1
Spire2	0.080342	0.72283	3	0.65642	-5.4488	0	0.71882	-2.5482	0	0.66214	-1.5528	1
Tmem184c	0.080371	-1.3075	3	0.43991	-1.1306	1	0.89693	-3.7975	0	0.1502	0.0019918	3
Hmgn2	0.0804	0.68796	4	0.19825	-0.86364	1	0.27037	-0.72868	3	0.8007	-1.2092	1
S100a4	0.080427	0.36065	3	0.63308	-2.1175	0	0.94489	-4.1106	0	0.71944	-2.5242	1
Mrgprh	0.080443	-0.24106	3	0.73638	-1.2254	0	0.64678	-3.9522	1	0.10037	-2.0567	1
CTRLMM_67346	0.080449	1.5144	1	0.4081	-1.2585	0	0.19932	0.50869	1	0.27244	0.30192	1
Fgfr1op2	0.080512	-1.7664	1	0.52261	-3.0858	1	0.66261	-1.9833	1	0.70508	-0.72552	1
Nrbf2	0.080528	0.99529	3	0.11902	-0.83206	2	0.4322	-2.3191	2	0.0031021	1.4309	4
Krt86	0.080563	1.4501	3	0.68574	-5.5509	0	0.87531	-1.8106	0	0.93793	-1.8189	0
Ttn	0.080643	0.62794	4	0.77669	-1.4097	0	0.98897	-4.3242	0	0.10527	-2.3175	3
Kcnj9	0.080804	-0.32465	2	0.88021	-6.8989	0	0.80536	-3.0582	0	0.38056	-0.19565	3
Ehbp1l1	0.080808	0.64557	4	0.30887	-1.0131	2	0.60208	-0.69601	1	0.18987	-1.7742	2
Il12b	0.080854	-0.17393	3	0.88492	-1.8136	0	0.79801	-1.4644	1	0.70568	-1.7037	1
Hapln4	0.080913	1.3103	3	0.050252	-1.3635	2	0.61734	-4.6519	1	0.10845	-0.020434	2
Lgr5	0.080991	0.49076	4	0.1921	-1.6531	2	0.39797	-1.9408	2	0.031458	0.27775	5
Shq1	0.081009	-3.8089	2	0.68772	-2.7037	0	0.53418	-5.6835	1	0.59763	-0.31119	2
Pon1	0.081034	0.94312	4	0.13959	-3.2026	1	0.090221	-1.4356	2	0.16203	0.073638	3
Vasp	0.081082	0.72015	3	0.89533	-4.5122	0	0.75101	-3.5086	1	0.35065	0.2938	3
Neu4	0.081089	0.88331	4	0.64689	-2.991	0	0.36313	-5.6877	1	0.73123	-1.9917	1
Tec	0.08111	0.46014	4	0.40382	-2.5525	1	0.36744	-2.8192	2	0.25591	0.15144	3
Mettl7a1	0.081142	-1.3238	1	0.54417	-1.6764	1	0.38784	-0.70362	2	0.57127	-1.7024	1
Spred3	0.081234	1.0819	3	0.52983	-6.0012	0	0.24649	-1.122	2	0.22152	0.57208	2
2610034M16Rik	0.081234	-0.12413	2	0.066864	-1.0602	3	0.46893	-3.4107	1	0.73831	-0.71467	1
Srgap1	0.081273	1.1308	3	0.55818	-3.0687	0	0.2047	0.19546	2	0.45501	-0.5145	2
Cdc42	0.081281	1.0073	3	0.34185	-0.77015	1	0.26599	-2.2392	2	0.048652	-0.82356	1
Rpap1	0.081422	1.1484	3	0.36059	0.044644	1	0.55669	-0.13425	1	0.051697	0.7164	4
Nt5c1a	0.081449	-1.7491	1	0.090818	0.021488	2	0.28593	-0.54657	3	0.5551	-2.3851	2
Tcf19	0.08145	0.36127	3	0.011584	0.58089	4	0.09364	-0.44492	2	0.95304	-0.94786	0
Krt18	0.081582	1.1639	3	0.13591	-3.8286	1	0.55077	-1.3925	1	0.70399	-1.6659	1
Ifna14	0.081587	0.16187	2	0.037968	-0.95634	2	0.28622	-2.9855	1	0.99856	-7.6701	0
Cypt15	0.081663	1.157	3	0.74832	-2.5552	0	0.80691	-4.539	0	0.74393	-0.94424	1
Gm4636	0.081694	1.0379	3	0.85004	-1.9086	0	0.76455	-1.9031	0	0.83182	-0.21346	0
Cnpy3	0.081852	0.9221	3	0.89863	-3.5313	0	0.16504	0.36578	3	0.14728	0.11311	2
Cd14	0.081903	0.064413	3	0.81311	-2.712	0	0.69941	-1.4021	1	0.24632	0.060917	3
Ccdc85b	0.081905	0.92965	3	0.77715	-6.8938	0	0.91122	-4.2646	0	0.66219	-1.7417	0
BC052040	0.081974	0.57424	3	0.25387	-3.2701	2	0.08378	0.31482	4	0.95003	-1.486	0
Syde1	0.08201	1.081	3	0.22213	-0.018589	2	0.016167	2.0201	3	0.75791	-1.1642	1
Slc27a6	0.082019	-1.6943	2	0.43589	-1.7205	1	0.59528	-1.4201	1	0.19912	0.21551	3
Ccdc120	0.082089	0.36818	3	0.67371	-3.7661	0	0.99227	-5.8478	0	0.76425	-0.73186	1
Cacna2d1	0.082144	0.93877	4	0.75106	-0.67434	0	0.19961	-0.91476	2	0.17846	-0.36887	2
Parp10	0.082235	-1.7168	1	0.0088816	-0.063362	3	0.47969	-3.4262	2	0.086551	-0.93754	2
Vmn1r45	0.082268	0.36875	3	0.90672	-7.0999	0	0.8433	-1.2071	0	0.69355	-1.1921	1
Plekhg4	0.082365	0.80488	4	0.77874	-3.4291	0	0.83057	-4.0142	0	0.68348	-0.88891	2
Eapp	0.082384	0.92505	4	0.72559	-1.5275	0	0.32562	-2.5778	2	0.8589	-2.0366	1
Fam108c	0.082449	1.0958	3	0.8122	-6.944	0	0.57432	-2.1921	1	0.7658	-1.9187	1
Magi3	0.082456	0.67491	3	0.1811	-3.3224	1	0.76721	-0.5228	0	0.37135	-0.15099	2
Abcb11	0.082483	0.073343	2	0.0070649	-2.909	2	0.057734	-0.84451	2	0.61657	-0.61829	2
Rhox10	0.082573	-3.8751	2	0.35242	-3.5683	1	0.89033	-2.4768	0	0.69489	-1.6924	1
CTRLHS_57141	0.082601	1.509	1	0.022843	1.6246	1	0.89767	-4.7159	0	0.27834	0.27779	1
Bex2	0.082608	-0.21953	3	0.26307	-1.0615	1	0.95923	-3.3314	0	0.055461	-0.3029	3
CTRLHS_57498	0.082647	1.5387	1	0.83104	-4.1111	0	0.28009	-0.10622	0	0.060972	1.6303	1
Cplx3	0.082684	-1.2612	2	0.028632	0.55	3	0.29576	-1.7401	2	0.17721	0.61607	3
Ralgds	0.082758	0.71893	4	0.32153	-0.84795	1	0.60865	-0.9308	1	0.87214	-2.1444	1
1700025G04Rik	0.082774	1.0866	3	0.33181	-0.92522	1	0.067278	-0.1879	2	0.56464	-1.0713	1
Duox2	0.082858	-0.098927	2	0.58133	-1.419	0	0.53307	-1.1063	1	0.53112	-0.71623	1
Slc25a20	0.082972	0.37336	3	0.75152	-1.6394	0	0.35793	-1.4186	2	0.17003	-1.1037	1
Adcy9	0.083001	0.54762	3	0.70641	-2.9274	0	0.077457	-7.7483	1	0.83046	-0.63909	0
Shmt2	0.083168	0.49399	4	0.079103	-1.0511	3	0.75512	-2.8958	1	0.91606	-0.98507	0
Akap7	0.083274	0.77121	4	0.70038	-1.9507	0	0.57912	-1.3445	1	0.61565	-0.37859	2
Zfp507	0.083387	0.89082	4	0.71736	-4.2154	0	0.94168	-3.8826	0	0.76442	-0.69113	1
CTRLMM_66434	0.083408	1.5358	1	0.12418	0.42764	1	0.1374	1.1535	1	0.54264	-0.95854	0
Sprr1b	0.083451	-0.62905	3	0.20032	-1.5861	2	0.4424	-2.1677	2	0.41919	-2.1678	2
Lman1	0.083644	0.23524	2	0.77724	-3.1235	0	0.23388	0.00037738	2	0.37896	-2.2467	2
Swap70	0.083664	0.42304	3	0.28747	-0.85553	1	0.92672	-2.0634	0	0.86231	-0.50162	1
Gpd2	0.083721	0.90269	3	0.84472	-2.1393	0	0.35258	-3.465	2	0.53648	-1.5427	2
Sep.09	0.083766	-0.15875	3	0.3349	-1.1516	1	0.1041	-0.82049	3	0.85089	-1.3112	1
Slc26a11	0.083921	-2.4993	2	0.027648	0.60654	3	0.90547	-2.7858	0	0.69652	-0.23534	1
Hnf4g	0.083978	-1.428	2	0.57946	-1.2279	1	0.83976	-4.3065	0	0.33094	0.17342	3
Sema4g	0.084057	-1.0439	1	0.54707	-0.86028	1	0.8065	-5.5678	0	0.77563	-2.4329	1
9330182L06Rik	0.084108	-1.5887	2	0.34027	-3.0685	1	0.99938	-5.7916	0	0.033712	1.1638	3
Rnf220	0.084131	0.74282	4	0.24413	-0.99637	1	0.025021	0.88142	4	0.74942	-0.31158	1
Rab14	0.084286	0.6952	4	0.70771	-3.9634	0	0.41305	-1.834	1	0.10596	0.58644	4
Amt	0.084296	0.42544	2	0.70855	-1.9905	0	0.67088	-3.5259	0	0.72077	-2.1285	1
Reck	0.084304	0.84884	4	0.66032	-1.4736	0	0.11754	-2.1173	2	0.93291	-2.4094	0
Ddx3y	0.084338	-0.98759	2	0.49183	-1.8282	1	0.75011	-2.1579	1	0.18978	0.28351	3
Aaed1	0.084463	0.44352	3	0.36258	-0.38415	1	0.26028	-0.49354	2	0.56779	0.21821	2
Nmt1	0.084467	0.38098	4	0.89929	-7.9569	0	0.46268	-1.1169	1	0.93995	-1.2008	0
Eif2a	0.084605	-0.54277	3	0.27929	-2.6044	2	0.038841	0.98281	4	0.39095	-0.70095	1
Vmn2r18	0.084632	0.68058	4	0.61987	-1.2196	1	0.46848	-4.1716	1	0.45897	-0.0039688	2
Mpp7	0.084665	0.88078	3	0.95864	-4.677	0	0.18169	-0.55708	2	0.033663	1.148	3
Ptcra	0.084688	1.0289	3	0.97206	-7.1936	0	0.81767	-3.8907	0	0.85735	-2.2536	0
Ugt1a10	0.084751	0.54568	4	0.79219	-2.414	0	0.43901	-1.4209	2	0.88066	-1.5432	0
Ccdc132	0.084782	0.43344	3	0.019826	0.68455	3	0.20984	-2.9208	1	0.36834	-0.61555	2
Vmn1r113	0.084789	0.73521	3	0.036725	0.17451	2	0.42973	-5.4839	1	0.042124	0.64063	2
Farp1	0.084817	0.5149	3	0.21761	-1.4119	2	0.62486	-3.9177	1	0.70928	-1.2669	1
Sirt5	0.084885	0.49872	4	0.87711	-1.4168	0	0.32508	-1.204	2	0.49445	-0.48417	2
Cd160	0.084951	0.47032	3	0.35743	-1.0866	1	0.71596	-2.0848	1	0.91318	-0.46913	0
Dmrtc1a	0.085023	1.2097	2	0.62526	-1.6066	0	0.86827	-6.4155	0	0.61592	-0.85529	1
Pik3r2	0.08507	0.52601	4	0.27707	-0.96001	2	0.37009	-0.49808	1	0.042682	0.59151	4
2310067B10Rik	0.085083	-0.40663	2	0.67261	-5.5293	0	0.42541	-2.1545	2	0.20908	-1.2861	2
Fbxl6	0.085165	0.37043	3	0.93547	-1.6905	0	0.48212	-2.3495	1	0.98671	-1.5191	0
Poli	0.085243	-0.96825	2	0.25106	-2.3513	2	0.83538	-1.2058	0	0.061574	0.37469	3
Aco1	0.085272	0.81968	2	0.8185	-6.6212	0	0.66927	-0.66733	0	0.031285	0.35413	2
Astl	0.085277	0.79467	3	0.77812	-3.0842	0	0.42386	-1.2113	1	0.38988	-0.74272	1
Fam131a	0.085286	-1.6587	2	0.84042	-5.3321	0	0.42091	-2.2242	2	0.52941	-0.87694	2
Cylc2	0.085318	-0.42889	2	0.78081	-7.7342	0	0.93068	-1.255	0	0.7511	-1.7178	1
Trim38	0.085351	0.80572	3	0.9605	-1.6896	0	0.28738	-2.6717	2	0.80709	-0.38205	1
Emc4	0.085396	-4.9363	2	0.95595	-2.6167	0	0.11226	0.71246	3	0.22489	0.49938	3
Narfl	0.085404	0.18269	3	0.89705	-5.4456	0	0.65743	-5.3885	1	0.30598	0.15217	2
Tpd52	0.085479	0.70881	4	0.87221	-5.8873	0	0.46291	-1.0822	2	0.51123	-1.5852	2
Fibin	0.085555	-0.051232	3	0.40564	-4.1389	1	0.24943	-0.0047327	1	0.83572	-0.62648	1
Heg1	0.085598	-2.1253	1	0.74602	-0.79103	0	0.65573	-2.722	1	0.59015	-0.34111	2
Vmn1r17	0.085722	-2.4199	2	0.25616	-4.9377	2	0.8052	-1.7939	0	0.083729	0.55421	3
Zfy2	0.085722	0.59566	4	0.78343	-3.16	0	0.19009	-2.7684	3	0.39291	-1.1704	1
Ahctf1	0.08579	0.97089	3	0.60929	-6.7036	0	0.73221	-2.5113	0	0.72691	-0.64731	1
Sall1	0.0858	0.030111	2	0.17566	-3.299	2	0.78299	-0.9164	0	0.7722	-1.5889	1
Magee2	0.085818	-3.509	3	0.74319	-1.8135	0	0.34007	0.22809	1	0.058031	0.69414	4
Amica1	0.085832	0.46569	3	0.81778	-1.6865	0	0.3912	-1.1008	2	0.56001	-0.22342	2
Map3k14	0.085857	0.78827	4	0.70259	-2.3855	0	0.46783	-1.3662	2	0.29212	-1.3074	3
Nqo2	0.085876	0.10787	3	0.18085	-1.1583	2	0.26986	-1.1838	1	0.13054	-0.67045	3
Dffb	0.085964	0.44866	3	0.5467	-4.8065	1	0.81082	-3.3516	0	0.90725	-1.8831	0
CTRLMM_67386	0.086072	1.545	1	0.72062	-3.3494	0	0.14121	1.1394	1	0.86398	-3.5366	0
CTRLMM_67266	0.086156	1.6435	1	0.041904	1.4181	1	0.29063	-0.21433	0	0.082108	1.5593	1
Cul4a	0.086159	0.67833	4	0.5891	-2.2313	0	0.0035779	1.9343	4	0.81069	-3.2258	1
Larp4	0.086198	0.63069	4	0.25736	-2.4528	1	0.30179	-0.32516	2	0.99146	-2.6201	0
2610020H08Rik	0.086202	-0.88059	2	0.90417	-2.959	0	0.98441	-5.692	0	0.66303	-1.6859	1
Rgs11	0.086274	0.93528	3	0.17048	-0.17727	1	0.64693	-2.0502	1	0.068423	0.62056	4
Inpp5a	0.086313	0.73063	4	0.92428	-4.2585	0	0.72212	-1.5495	1	0.2139	0.32734	3
Mysm1	0.08632	0.18997	3	0.15984	-0.95973	1	0.47536	0.1233	2	0.57011	-0.84664	2
Kcnh5	0.086369	-0.22168	1	0.084856	-3.5909	1	0.67516	-1.11	1	0.9394	-2.0141	0
Nol4	0.086471	-1.1782	2	0.25131	-2.2951	1	0.81328	-1.4338	0	0.9638	-1.6755	0
Dok1	0.086589	0.52198	4	0.7858	-2.3987	0	0.93849	-2.9684	0	0.0070063	-0.89956	2
Icos	0.086633	-0.45163	3	0.54888	-1.869	1	0.24046	-0.17845	3	0.40362	-0.010332	2
Cryaa	0.086737	0.75528	4	0.53091	-1.0498	1	0.044285	-0.29372	3	0.54719	-1.8239	2
Tnip2	0.086827	0.21317	3	0.68528	-1.1118	0	0.93865	-4.3666	0	0.22475	-1.9476	2
Krt17	0.086838	0.82794	3	0.99636	-4.4544	0	0.95573	-4.0392	0	0.49993	-0.18636	2
Cdk8	0.086865	0.76522	4	0.91382	-1.7917	0	0.17967	-0.097841	2	0.2438	-2.6519	1
Vmn1r234	0.086946	1.0571	3	0.27963	-1.1426	1	0.2999	-4.7448	1	0.65214	-0.16032	1
Pnck	0.087041	0.16844	3	0.18002	-2.9389	1	0.37062	-2.8802	2	0.49067	-0.6728	2
Vps33b	0.087082	0.33749	3	0.32815	-2.6296	1	0.92165	-5.6697	0	0.03609	0.9088	5
Pdzd3	0.087134	-0.59291	2	0.71032	-1.7308	0	0.059446	-6.8662	1	0.95696	-3.573	0
Zfp821	0.087171	0.0070692	3	0.068242	0.039274	2	0.66601	-0.67993	1	0.61357	-0.13234	2
Prkrip1	0.087214	-3.3803	1	0.88939	-7.2003	0	0.61291	-3.1819	1	0.48468	-3.6511	2
Ctcf	0.087256	0.18614	2	0.84721	-7.251	0	0.1647	-0.14665	2	0.066146	0.05484	2
Svs1	0.087363	-1.672	2	0.4448	-2.6344	1	0.8577	-0.55644	0	0.82216	-0.53129	1
Vmac	0.087371	0.045679	2	0.42728	-1.1588	1	0.44171	-1.6288	1	0.30084	-1.94	2
Tacr1	0.08742	-0.074977	1	0.02334	-0.86697	2	0.86149	-1.6087	0	0.073246	0.13539	2
1700029I15Rik	0.087427	0.86473	3	0.34751	-5.6671	1	0.16942	-0.94666	2	0.5514	-3.536	1
Uxt	0.087448	-4.3482	1	0.53844	-2.5623	0	0.5839	-1.8027	1	0.60474	-1.3069	1
Qrich1	0.087457	0.027885	2	0.54061	-3.9793	1	0.74471	-1.8489	1	0.16235	0.39689	4
Lsm5	0.08748	0.99116	2	0.8853	-6.9468	0	0.13274	0.79459	2	0.95777	-5.0396	0
Gabpb1	0.087528	0.35148	3	0.57066	-2.9262	1	0.35465	-1.4375	2	0.89475	-0.78184	0
Nipal2	0.087548	0.435	3	0.90236	-2.8103	0	0.53398	-5.7129	1	0.70716	-2.8179	1
Ubap2l	0.087609	-5.1035	2	0.52832	-4.8899	1	0.28849	-2.1579	2	0.72758	-3.7142	1
Gid8	0.087625	0.84993	3	0.50605	-2.5068	0	0.80146	-4.0129	0	0.67693	-0.37216	1
CTRLMM_66638	0.087658	1.6457	1	0.34833	-1.2792	0	0.83518	-8.1455	0	0.60874	-1.7081	0
Anxa11	0.087665	-0.62488	2	0.75102	-1.3573	0	0.33175	-1.8339	2	0.88047	-1.1442	0
2300002M23Rik	0.087693	-0.85168	3	0.60647	-4.6387	1	0.16	-0.12541	3	0.69796	-1.3728	1
Fut11	0.087724	0.69664	4	0.29554	-1.9641	2	0.19961	0.17415	3	0.12258	0.67236	4
Tusc5	0.087749	1.0127	3	0.44405	-0.51193	1	0.17492	-0.92919	1	0.69363	-0.6927	1
Rspo4	0.087805	-0.7026	2	0.93276	-6.0553	0	0.91446	-4.0243	0	0.68394	-1.7722	2
Phactr3	0.08786	-0.20394	2	0.0044518	-1.156	2	0.84056	-2.5476	0	0.92712	-2.0579	0
Kcnf1	0.087947	-6.571	1	0.4767	-0.13338	1	0.047837	-1.4184	3	0.70708	-1.4032	1
Ppard	0.088039	-0.058492	3	0.084834	-0.72937	3	0.051057	0.508	4	0.77336	-2.3997	1
CTRLHS_57298	0.088047	1.3975	1	0.24125	-0.34934	0	0.97384	-6.6886	0	0.73957	-1.6609	0
Cops8	0.088092	-0.28376	3	0.6089	-4.2831	1	0.0020824	2.1577	4	0.77968	-1.7701	1
Wdr12	0.088341	-1.2762	3	0.64877	-2.0936	0	0.2562	0.23461	3	0.9802	-3.4056	0
4932414N04Rik	0.088373	0.42944	3	0.15615	-0.72656	2	0.52443	-1.4709	1	0.10142	0.84494	3
Cyb561a3	0.088402	0.6212	3	0.48183	-5.5589	1	0.85799	-3.9036	0	0.69952	-2.3456	1
Tnfsf9	0.088552	0.13638	3	0.080286	-2.2419	1	0.46081	-2.8595	1	0.92509	-3.7749	0
4930451I11Rik	0.088578	0.88695	3	0.9237	-3.9072	0	0.022802	-0.98489	2	0.61286	-7.4591	1
Tmem121	0.088616	0.71868	4	0.82266	-0.81591	0	0.97509	-2.8743	0	0.014984	-1.3286	1
CTRLMM_66601	0.088686	1.4996	1	0.28269	-0.65166	0	0.80633	-3.8101	0	0.27609	0.30073	1
Auts2	0.088703	-1.3618	1	0.97162	-4.7739	0	0.27417	-3.2733	1	0.41386	-1.6724	2
Defb14	0.088735	1.3387	2	0.87478	-4.9325	0	0.10506	-0.07052	1	0.41297	-1.1091	1
Rad18	0.088766	0.26256	3	0.087921	-0.33687	2	0.34257	-1.6918	2	0.68765	0.0044002	2
Eef1a2	0.088838	-0.42087	2	0.82132	-5.1876	0	0.10843	0.9216	3	0.4368	-0.13938	2
Krtap16-3	0.088854	-1.2678	2	0.32789	-0.87225	2	0.62826	-5.975	1	0.095095	0.54191	4
CTRLHS_57755	0.088855	1.3275	1	0.62896	-1.6827	0	0.9767	-5.4919	0	0.39458	-0.20927	0
Tgm4	0.088913	0.64635	4	0.46303	-1.3264	1	0.94305	-1.6635	0	0.12643	0.44872	3
Tnni2	0.089013	-0.93053	1	0.52093	-2.4844	1	0.29836	-2.6876	1	0.70597	-1.3019	1
Sfrs18	0.089027	0.086712	3	0.47988	-5.513	1	0.69351	-0.88169	1	0.26539	-1.7321	2
Arid1a	0.089151	-2.8772	2	0.71017	-1.6637	0	0.0064375	1.7664	4	0.0093343	1.1746	4
Glt25d1	0.089227	-4.5454	2	0.065512	-1.4414	2	0.53326	-4.4583	1	0.16223	-3.0868	1
Vmn1r232	0.089303	-0.088566	2	0.62753	-2.6437	0	0.04907	-1.075	3	0.95169	-1.8056	0
Cela3a	0.089307	0.78684	4	0.62152	-1.4735	1	0.33359	-0.60632	2	0.14287	-0.5082	3
Gprc5c	0.089331	-0.014378	2	0.12265	-1.0427	1	0.30331	-0.69228	2	0.23208	-0.52131	2
Galnt3	0.089349	0.70051	4	0.1852	-2.064	1	0.0053667	0.90524	5	0.66765	-0.77048	1
Parp9	0.089436	1.0135	3	0.19903	0.21886	2	0.22043	-3.8477	1	0.070225	0.41629	3
Wdr85	0.089453	-3.6804	1	0.060039	-6.106	2	0.029976	-1.9458	1	0.56688	-0.47928	2
Swt1	0.08948	0.62087	3	0.12655	-1.0183	2	0.56322	-3.9155	2	0.09164	0.6054	4
Gabra2	0.089511	-0.75581	2	0.074837	-0.65933	2	0.38004	-0.87734	1	0.32674	0.079903	3
Midn	0.089772	-1.2608	2	0.82904	-2.5697	0	0.48718	-2.6631	2	0.68476	-0.20209	2
Lilra5	0.089788	-4.5244	2	0.31625	-1.4748	1	0.071528	-3.7779	2	0.49016	-3.2117	2
D630039A03Rik	0.08984	-0.43541	1	0.47244	-1.2153	1	0.64556	-1.8629	1	0.19178	0.38693	3
Mmp20	0.089857	1.0496	3	0.79609	-2.723	0	0.7581	-5.1413	0	0.88186	-2.8414	0
Arid4a	0.089899	1.1808	3	0.14715	-0.28936	2	0.93954	-5.4161	0	0.80613	-4.4283	1
Josd2	0.089977	1.1038	2	0.55582	-0.72155	0	0.30896	-3.9282	1	0.96832	-2.2055	0
Cachd1	0.089989	-1.7304	1	0.43772	-0.59337	0	0.24073	0.072885	1	0.545	-1.5997	1
Cmbl	0.090019	-0.19515	1	0.73038	-2.6468	0	0.31699	-1.092	2	0.887	-1.5243	0
9130008F23Rik	0.090067	0.034697	3	0.31919	-2.1764	2	0.16526	-4.0229	2	0.52337	-0.89321	2
Cd200r2	0.090127	0.68708	3	0.9384	-1.812	0	0.34606	-1.561	2	0.86225	-1.1756	1
Prl14l	0.090189	0.57646	3	0.25171	-4.9217	1	0.89605	-1.2646	0	0.095892	0.67682	4
Hax1	0.090202	0.89593	4	0.20722	-2.953	1	0.73245	-1.4483	1	0.95044	-4.8509	0
Slc9a7	0.090322	0.16186	2	0.39851	-0.61254	1	0.73802	-1.9673	1	0.38066	-1.1556	2
Kdm4b	0.090363	-3.4832	2	0.35616	-1.8066	1	0.61784	-1.2404	1	0.15314	0.68392	3
Ick	0.090377	1.145	3	0.13602	-0.54221	2	0.45205	-0.68298	2	0.39311	0.0052197	1
Taf13	0.090461	-0.32741	2	0.96445	-7.624	0	0.13196	0.64933	3	0.96407	-2.3743	0
4930529M08Rik	0.090553	0.9853	3	0.21632	-2.9406	2	0.014713	1.7369	3	0.27935	0.26327	3
Bcor	0.090652	1.0653	3	0.31267	-2.3494	1	0.30558	-2.6648	1	0.30806	-0.33852	2
Ntf5	0.090665	-0.5225	1	0.4218	-3.9753	0	0.75003	-5.415	0	0.79796	-3.2836	0
Camta2	0.090695	0.71638	3	0.28219	-4.3174	1	0.68882	-1.4865	0	0.78374	-5.8055	0
Rnf113a2	0.090796	0.78759	4	0.87626	-6.8313	0	0.50282	-1.4795	2	0.88552	-4.9162	0
Agxt	0.0908	-0.49717	2	0.96597	-2.6439	0	0.40109	-1.0189	2	0.27243	0.32758	3
4931429I11Rik	0.090825	-0.50797	2	0.17343	-5.9467	1	0.095276	-3.4579	1	0.33301	-4.4283	2
Alox5ap	0.09091	-2.0951	2	0.23689	0.01516	2	0.075795	0.68156	3	0.50842	0.09268	2
CTRLHS_57726	0.090966	1.4672	1	0.057736	1.0747	1	0.35586	-0.6187	0	0.95229	-5.3434	0
Zbtb9	0.090998	-3.4974	2	0.37029	-5.0435	1	0.67892	-2.9126	1	0.24422	-1.2894	1
Cndp2	0.091022	0.56386	4	0.40357	-2.7744	1	0.59339	-1.5686	1	0.61243	-2.252	1
Prl6a1	0.091097	-0.5776	1	0.24782	-0.10329	2	0.99015	-5.4779	0	0.43904	-0.77107	2
Lef1	0.091219	0.79025	3	0.39023	-1.201	1	0.52261	-0.48654	1	0.14174	-0.14024	2
Smr3a	0.091235	0.3144	3	0.54658	-6.1709	1	0.86826	-2.931	0	0.61703	-0.97733	1
Bub3	0.091236	-2.5946	1	0.1167	0.60913	1	0.75622	-4.9731	0	0.85728	-2.3977	0
Ang6	0.091323	-0.97803	1	0.61549	-2.7775	0	0.86234	-4.01	0	0.045854	0.2198	2
Ptk2	0.09136	-0.12024	2	0.03389	-1.6188	1	0.45065	-1.5661	2	0.93052	-0.8974	0
Zfp85-rs1	0.091389	-0.72307	2	0.34335	-5.5444	1	0.49594	-2.1256	2	0.82212	-0.66579	1
Cma1	0.091607	0.94898	3	0.24282	-0.99103	1	0.62199	-2.1147	1	0.69192	-3.6563	1
Acy3	0.091608	0.50491	4	0.011248	0.50979	3	0.13313	-0.37859	3	0.50966	-0.52949	2
Foxp1	0.091612	0.069446	2	0.50867	-1.0084	1	0.76782	-3.5219	0	0.51969	-0.64336	2
Prkaa2	0.091899	0.24184	3	0.34293	-0.49224	1	0.086908	-0.79307	2	0.49924	-2.1305	2
CTRLMM_67293	0.091899	1.4721	1	0.33994	-0.9821	0	0.64617	-2.3599	0	0.96414	-8.5519	0
Smoc1	0.091982	0.68472	4	0.98244	-3.4683	0	0.60014	-2.0005	1	0.92515	-0.84417	0
Dhx36	0.09213	0.7612	4	0.25042	-3.658	1	0.56341	-0.48155	2	0.60342	-1.139	2
Cenpf	0.092157	0.4058	3	0.57434	-0.16294	1	0.25068	0.14621	3	0.96725	-2.3974	0
Tubgcp4	0.092203	-0.19479	2	0.21263	-0.88969	2	0.3332	-0.6353	2	0.3521	-0.5607	2
Aldh1a3	0.092235	0.53577	4	0.73306	-1.1363	0	0.072803	-0.84784	2	0.28092	-0.99925	2
Mfsd7a	0.09225	0.53506	4	0.05172	-2.8826	2	0.33468	-0.7683	2	0.90391	-0.9043	0
Nme5	0.092284	-1.1406	2	0.076168	0.02918	3	0.39363	-2.1359	2	0.24927	-0.39256	2
BC028528	0.092446	0.8349	3	0.21148	-4.8032	1	0.3422	-1.7517	2	0.2349	-0.0040712	2
C230081A13Rik	0.092452	-1.7969	2	0.12407	-0.65151	2	0.083581	-3.5151	1	0.63548	0.20685	2
CTRLHS_57702	0.092518	1.635	1	0.23708	-0.45612	0	0.039348	2.5941	1	0.64974	-2.2232	0
Cntnap1	0.092588	-0.67866	2	0.76573	-5.5333	0	0.81658	-2.7887	0	0.91006	-2.6848	0
Cyb5r4	0.092598	0.0034905	3	0.149	-1.0921	1	0.16269	-0.31261	3	0.2596	-0.25108	3
Aqp1	0.092602	0.2065	3	0.21882	-5.9605	1	0.2954	-2.2868	2	0.22461	-0.48735	2
Acot7	0.09263	0.9549	3	0.81621	-2.8706	0	0.61989	-2.7242	1	0.32648	-0.61511	2
Sorcs2	0.092672	-1.104	1	0.51243	-3.0875	1	0.0078921	2.1872	4	0.96307	-1.4351	0
Polr2c	0.092733	-2.6674	2	0.95479	-7.2667	0	0.03242	-3.5187	1	0.045882	-0.074302	2
Immt	0.092737	-2.4408	1	0.65227	-2.0917	0	0.97328	-5.2993	0	0.66185	-0.30478	1
Zfp414	0.092883	-0.16186	3	0.032724	0.59467	3	0.68563	-6.0482	1	0.20503	0.15808	3
Ubr4	0.092934	0.63416	4	0.86995	-1.6888	0	0.31724	-0.30707	2	0.58915	-0.76798	2
Ndufa2	0.092962	0.90012	3	0.062866	0.26535	3	0.86849	-1.4843	0	0.29911	-1.0978	2
Nkx2-1	0.093013	0.4619	4	0.00083453	0.32144	3	0.6231	-4.194	1	0.096624	-0.24963	3
Scgb2b27	0.093019	-0.84595	2	0.96135	-6.107	0	0.11605	-0.41687	2	0.79432	-4.3256	1
Rnf4	0.093124	0.64889	4	0.77288	-6.064	0	0.10177	0.38862	3	0.36061	-1.5671	1
Tnfrsf19	0.093138	1.2249	3	0.32181	-1.078	1	0.51627	-7.3699	1	0.62477	-1.6499	1
Aqp7	0.09315	0.60078	4	0.90873	-4.4088	0	0.47805	-2.0962	1	0.11385	0.59794	4
Arfgap1	0.09327	0.25456	2	0.78307	-4.6669	0	0.69161	-1.8189	0	0.63984	-0.074927	1
Gramd3	0.093328	0.018165	3	0.95048	-2.3871	0	0.13282	-2.1356	2	0.29239	-0.56625	3
Cetn1	0.093335	-5.0208	1	0.95589	-2.9435	0	0.93105	-4.8932	0	0.38943	0.15225	3
Ablim1	0.093485	1.2001	2	0.56739	-3.1768	0	0.76892	-1.9018	0	0.99696	-4.69	0
Slc1a4	0.093491	-2.5736	3	0.82638	-2.6325	0	0.43514	-3.6585	2	0.60546	-1.827	2
Parp1	0.093515	-0.91995	2	0.65916	-4.5683	0	0.36867	-1.0814	1	0.53405	-1.2799	2
Samd11	0.09361	0.021701	3	0.33802	-1.2785	1	0.61622	-4.8376	1	0.34872	-0.24008	2
Gje1	0.093638	-0.96789	2	0.5553	-3.3987	1	0.49677	-0.67723	1	0.2084	-2.3615	1
Cxcr5	0.093639	-0.084782	3	0.38227	-1.5695	1	0.34595	-1.8331	2	0.995	-1.9339	0
5730494N06Rik	0.0938	-1.4515	2	0.88146	-4.7871	0	0.21952	-2.1899	3	0.5272	-0.33434	1
Snx12	0.093857	0.69873	3	0.62935	-2.8961	0	0.95725	-5.8398	0	0.11758	-2.5921	1
H2-M5	0.093943	0.42399	3	0.50456	-4.4292	1	0.65186	-1.1281	1	0.63016	-1.0344	1
Suz12	0.093945	0.41655	4	0.36014	-0.69009	1	0.73636	-1.5388	1	0.2621	0.19542	3
Areg	0.093954	-2.1483	1	0.40614	-5.1627	1	0.48971	-1.3568	1	0.76661	-1.4889	1
Gm8298	0.09398	0.71958	4	0.6818	-1.993	0	0.33939	-1.3526	2	0.90112	-0.6062	0
Dmpk	0.094026	-1.2682	2	0.3897	-2.0579	1	0.19122	0.20873	3	0.83053	-0.48874	1
Ccdc121	0.09409	0.53383	4	0.91962	-2.2705	0	0.96317	-5.4516	0	0.52002	-2.4181	2
Extl3	0.094132	-1.6423	1	0.25378	-0.19996	2	0.35931	-3.8545	1	0.59304	-0.24377	2
4933427D14Rik	0.094144	0.010379	3	0.16194	-2.2445	2	0.37733	-1.7486	2	0.92267	-2.5365	0
Galntl1	0.094275	-1.7282	2	0.69	-1.3399	0	0.50833	-0.49149	1	0.36978	-0.034594	3
Stau1	0.09429	-0.22184	3	0.62328	-1.8786	0	0.54777	-2.0283	2	0.34004	-0.7723	3
Foxk2	0.094291	0.87922	3	0.58293	-2.1293	0	0.88205	-4.7463	0	0.13842	0.59323	3
Abca9	0.094405	-1.1706	2	0.67404	-4.0679	0	0.48489	-2.1289	1	0.32083	-0.43051	3
Prox1	0.094549	-1.54	2	0.47747	-2.3553	1	0.13919	-0.61341	3	0.90694	-0.93716	0
Gm11487	0.094597	0.48709	3	0.30992	-4.0863	1	0.13931	-2.1933	2	0.62901	-0.501	2
Sly	0.094698	0.42069	2	0.7217	-4.7899	0	0.12899	1.3051	2	0.83237	-6.8239	0
Lamc3	0.094699	-0.38241	2	0.012892	0.65239	3	0.33413	-4.4523	1	0.62096	-1.4876	1
Cd300ld	0.094703	-1.7017	2	0.13172	-3.9966	1	0.99801	-5.662	0	0.13357	0.71374	3
Nsmce1	0.094797	-2.4622	3	0.90255	-7.4011	0	0.067323	0.57122	4	0.2629	-1.4679	2
Slc25a13	0.094884	0.6934	4	0.37197	-1.5403	1	0.030896	0.7239	4	0.84837	-1.3236	1
Zcchc8	0.094886	0.29158	3	0.57631	-0.50892	1	0.45438	-4.0925	2	0.67099	-1.6618	1
Msl1	0.094941	0.75645	4	0.055756	-0.10879	3	0.8243	-5.1031	0	0.92547	-1.2911	0
Dtx1	0.095045	0.93375	3	0.89442	-2.5538	0	0.43666	-1.2227	1	0.22361	-0.095094	2
F2r	0.095071	0.54061	4	0.8657	-1.9022	0	0.95801	-3.4479	0	0.37491	-0.5298	2
Kcnmb3	0.095139	-4.9298	1	0.42565	-2.6152	1	0.41657	-2.0063	2	0.036958	-1.6891	1
Bmp7	0.095192	0.37612	3	0.38496	-7.758	1	0.32407	-1.0808	2	0.87907	-1.1181	0
Sertm1	0.095218	-1.4275	2	0.52843	-5.7806	0	0.40239	-1.5	1	0.55475	-0.52035	1
Zfp53	0.095369	-0.51136	2	0.25475	-1.8697	1	0.29391	-1.0714	2	0.7428	-2.0156	1
Rapsn	0.095561	0.44694	4	0.6282	-3.4235	0	0.0035194	1.3414	5	0.49819	-2.427	2
Mapk8ip1	0.095598	-0.37683	2	0.43387	-1.151	1	0.074088	0.54042	4	0.14124	-0.92556	2
Ggnbp2	0.095728	0.48481	4	0.84786	-8.0397	0	0.36278	0.16432	2	0.97557	-4.6385	0
BC057079	0.095786	0.40463	3	0.2779	-1.6061	1	0.96147	-5.2528	0	0.92558	-1.3609	0
Itpka	0.095854	1.0397	3	0.24434	-1.5608	1	0.12663	-0.19335	2	0.71486	-0.84492	1
4930430A15Rik	0.095876	-1.2623	3	0.21278	-2.2062	2	0.087731	0.32013	4	0.73816	-2.0613	1
Guca1b	0.096008	-1.3277	2	0.74364	-3.4688	0	0.64385	-2.8831	1	0.36176	-0.64524	2
2310002L09Rik	0.096095	0.60462	4	0.71197	-5.6052	0	0.57703	-1.3536	1	0.34801	-1.3561	2
Cnot10	0.096101	0.63861	3	0.95736	-7.4149	0	0.6427	-3.3023	1	0.26029	-4.4296	1
Gstm4	0.096163	0.15662	3	0.96551	-4.8106	0	0.99558	-5.4025	0	0.99989	-5.7381	0
Fgd2	0.096296	0.81307	4	0.62404	-1.7358	0	0.57215	-0.75245	1	0.86009	-2.489	1
0610007P22Rik	0.096376	-1.1789	2	0.43451	-2.9972	1	0.046783	0.092658	3	0.09271	0.67987	3
CTRLHS_57599	0.096511	1.3707	1	0.15841	0.1569	0	0.6255	-1.9288	0	0.046606	1.7401	1
Sp8	0.09653	0.79163	4	0.95728	-3.9199	0	0.53424	-2.3795	2	0.81576	-0.92877	1
Tmem165	0.096742	-0.14384	2	0.9195	-2.0297	0	0.64339	-2.3576	1	0.52934	-0.4827	1
Lsm2	0.096742	1.2562	3	0.64152	-7.0586	0	0.043015	1.3637	3	0.76143	-5.8186	0
Mmp27	0.096855	0.62105	4	0.18084	-1.3343	1	0.17047	-2.629	1	0.26305	-0.25206	3
Tcerg1	0.096991	0.48073	4	0.16558	-2.1616	1	0.83702	-2.5567	0	0.72591	-1.1867	1
Itgb3	0.096991	0.16293	3	0.63886	-2.0275	0	0.46439	-0.58164	2	0.86461	-0.91797	1
Rims4	0.097051	-0.72867	2	0.32696	-1.598	2	0.65127	-1.9765	1	0.54475	-0.583	2
Opn1sw	0.097055	-0.10978	3	0.033536	-2.2385	1	0.71098	-1.6818	1	0.12193	0.70559	4
Grik5	0.097146	-0.70553	2	0.059964	-1.1752	3	0.18875	-0.80097	2	0.82705	-0.24455	1
Asb11	0.097174	0.4021	3	0.70031	-1.7913	0	0.57313	-3.4354	1	0.51607	-0.12695	1
Zfp560	0.097183	1.0465	3	0.52726	-2.1949	1	0.80476	-3.9317	0	0.99909	-7.5971	0
Ezh2	0.097224	0.36423	4	0.11048	-0.28267	1	0.6134	-1.3185	1	0.66334	-0.16742	1
Rab1b	0.097238	0.78419	4	0.15779	-3.3923	1	0.78952	-1.0387	1	0.64813	-0.56089	1
Rgs2	0.097359	0.49855	4	0.71074	-4.1438	0	0.9428	-5.0352	0	0.45165	-1.0995	2
Gm10142	0.097505	0.71234	3	0.53154	-5.6355	0	0.61854	-2.3216	1	0.2523	-0.2007	2
Apoc3	0.09757	0.44288	3	0.57535	-2.6203	0	0.17911	-0.3224	2	0.058615	-0.019109	2
Mapkapk3	0.097674	0.57104	4	0.9989	-5.1408	0	0.68212	-2.6285	1	0.075418	0.43174	4
Dnajc21	0.09768	0.80989	3	0.10537	-1.0712	2	0.50547	-2.0634	1	0.38055	-1.728	1
Prss56	0.097682	-1.3372	1	0.38126	-7.3966	1	0.22164	-0.81062	3	0.33418	-0.36821	3
Pik3c2b	0.097696	0.42692	4	0.72433	-1.7807	0	0.099794	-0.27071	3	0.61538	-0.99273	2
Vwa5a	0.097945	0.72536	4	0.2961	-0.76516	1	0.2808	-2.8616	1	0.067554	-0.34848	3
CTRLHS_57207	0.097971	1.2175	1	0.69558	-1.7272	0	0.98758	-6.1724	0	0.32194	0.061292	0
Actl6a	0.098006	0.90033	3	0.49294	-6.8288	1	0.12285	-0.86942	2	0.87352	-4.1922	0
Snx33	0.098029	1.1499	3	0.75654	-3.0034	0	0.36477	-0.95153	2	0.11082	-0.62464	1
Kiss1r	0.09805	0.94069	3	0.60678	-0.51321	0	0.82303	-0.95403	0	0.8482	-0.62023	0
Ccdc101	0.098079	-3.0731	2	0.20299	-0.069178	1	0.45286	-3.9707	1	0.96454	-4.9078	0
Ccnd3	0.098102	-0.87048	2	0.57675	-3.0822	0	0.041651	0.37335	3	0.78567	-1.0481	1
Sbno1	0.09825	-0.3272	3	0.99246	-7.7862	0	0.45123	-1.094	1	0.54735	-2.1227	2
Txndc12	0.098275	0.75405	3	0.091045	-0.86706	2	0.6635	-2.4501	1	0.21075	-0.66216	2
Rab24	0.098276	-2.1179	1	0.088719	-2.0128	1	0.96091	-3.6172	0	0.11812	-4.6785	1
Cox7a2	0.098319	0.96721	3	0.29063	-5.2966	1	0.10206	-3.3865	2	0.69422	-1.1106	1
Slc22a14	0.098395	0.50767	3	0.81911	-3.2356	0	0.91392	-3.6488	0	0.44537	-0.79071	1
Fam209	0.098432	0.7	4	0.42747	-1.8332	1	0.50647	-1.7835	1	0.48437	-1.3107	1
Pcnx	0.098521	0.97821	3	0.30823	-3.6307	1	0.20541	-4.6234	1	0.57897	0.23598	2
Fam65a	0.098538	0.8575	4	0.69209	-3.5251	0	0.28463	-1.9008	3	0.95684	-2.7571	0
Hoxd9	0.098546	-0.91287	1	0.6388	-3.5054	0	0.67272	-1.511	1	0.58379	-1.4277	2
Fbxl4	0.098547	0.47734	3	0.060258	0.057903	3	0.26456	-0.90369	3	0.023797	0.35981	3
Cdc42ep4	0.098596	0.84927	3	0.12183	0.053622	2	0.68436	-2.6775	1	0.33262	-0.080498	2
Cebpe	0.098618	0.53611	3	0.23416	-0.18838	2	0.059644	-0.58492	2	0.80644	-2.3103	1
B3gat2	0.098655	0.76356	4	0.92232	-7.5174	0	0.14007	-0.60874	2	0.70825	-1.727	1
Prr15l	0.09873	0.90528	3	0.74327	-6.8102	0	0.41539	-1.5759	2	0.9405	-7.003	0
Tceal6	0.099004	0.5234	4	0.039633	-0.66097	3	0.095684	-0.67062	2	0.76544	-3.0697	1
Lcn8	0.099005	0.15748	2	0.037334	0.55157	3	0.23337	-1.7949	1	0.54003	-0.31321	2
Tceal3	0.09901	0.80294	3	0.89575	-3.0228	0	0.86927	-1.5778	0	0.97763	-1.682	0
Hpse2	0.099135	0.82435	3	0.34012	-5.2409	1	0.17185	-0.62941	2	0.19249	0.52638	3
Ptpn18	0.099335	-0.7997	3	0.42685	-1.3551	1	0.33179	-1.2984	2	0.68088	-0.95434	2
Nnt	0.099512	-1.0936	2	0.39237	-2.0822	1	0.83397	-1.9578	0	0.9106	-2.5585	0
Dhrs7b	0.099526	-1.5149	2	0.040756	0.36851	3	0.66529	-1.3246	1	0.22865	0.43892	3
Cd53	0.099544	-1.7426	2	0.52736	-2.385	1	0.54218	-0.088337	1	0.76296	-0.77174	1
Npnt	0.09956	-2.0367	1	0.65588	-2.2948	0	0.35547	-2.1651	1	0.56229	-0.40219	2
March5	0.099598	0.76023	3	0.21514	-0.64469	2	0.41773	-3.3489	1	0.3473	-0.078265	2
CTRLHS_57343	0.099632	1.7374	1	0.6279	-7.3558	0	0.68244	-7.56	0	0.47439	-0.98656	0
Lrfn1	0.099844	0.13643	2	0.46723	-1.6442	1	0.3067	-0.46198	2	0.30149	-1.1345	2
Mpv17l	0.099847	-1.9866	1	0.28234	-2.6007	0	0.78049	-3.757	0	0.27161	-4.4177	1
CTRLMM_66408	0.099854	1.5572	1	0.3466	-1.3063	0	0.48084	-1.912	0	0.24014	0.54373	1
Cox5a	0.099936	0.60521	2	0.8529	-3.8637	0	0.68567	-0.95725	0	0.65568	-2.7811	1
Nkain2	0.099962	-0.87467	3	0.59068	-2.2529	0	0.9295	-3.7304	0	0.34426	-2.0818	2
Edc3	0.10009	0.60634	3	0.958	-4.5852	0	0.12942	-0.12807	2	0.98865	-3.7307	0
Slc39a2	0.1001	-0.33378	1	0.24292	-0.28819	1	0.4916	0.093242	1	0.40729	-3.735	1
Rhbdd1	0.10022	0.75576	4	0.022005	-0.61269	3	0.82505	-3.2886	0	0.79383	-1.2945	1
Ugt1a2	0.10024	0.50922	4	0.89196	-6.4258	0	0.43303	-2.42	2	0.74078	-0.43699	1
Nwd1	0.10033	-0.92463	2	0.27885	-0.10826	2	0.78055	-1.2976	1	0.22897	0.37619	3
1190005F20Rik	0.10033	0.51727	4	0.72917	-2.9388	0	0.80513	-4.2132	0	0.58241	-1.7408	1
Slc13a4	0.10041	-3.6784	2	0.51169	-5.9477	1	0.82622	-0.90248	0	0.19318	-1.0044	2
Snx8	0.10042	0.38515	3	0.51372	-3.6464	1	0.30625	-2.3123	1	0.54441	-0.39806	2
Krt7	0.10042	0.66841	4	0.77751	-1.7494	0	0.35393	-5.3214	1	0.71546	-1.3098	1
Cblb	0.10044	0.13816	3	0.23112	-0.84199	2	0.28725	-0.95857	2	0.2415	0.31905	3
Cat	0.10049	0.55631	4	0.97799	-4.4632	0	0.35851	-1.1881	1	0.15169	-0.48499	1
Tmcc2	0.10064	0.08928	3	0.71579	-4.194	0	0.97627	-3.0597	0	0.30005	-1.6961	2
Sh3bp1	0.10066	0.88412	3	0.30273	-6.7475	1	0.52288	-0.34498	1	0.61723	0.057545	1
Slc43a3	0.10073	0.38245	3	0.15222	-0.21266	2	0.38163	-0.62816	1	0.55618	-0.10519	2
Fam171a2	0.10074	0.91037	4	0.77781	-2.8655	0	0.67076	-1.8212	1	0.96409	-5.8406	0
Fgf20	0.10079	-1.8571	2	0.27933	-2.5335	1	0.454	-2.0987	2	0.15748	0.42699	4
Reg3b	0.10081	0.52649	4	0.095863	0.17574	2	0.12548	-1.852	2	0.60944	-0.29789	2
5330417C22Rik	0.10084	0.65616	4	0.18025	-2.254	1	0.057884	-0.17023	1	0.27388	-0.36615	3
Tmem63a	0.10093	0.71293	3	0.74613	-1.11	0	0.66881	-4.4453	0	0.98315	-2.2891	0
Adam30	0.10094	-0.26594	2	0.43272	-5.1127	1	0.73576	-3.3613	1	0.80459	-2.9534	1
Hsd17b14	0.1012	-2.2969	2	0.19617	-2.49	1	0.31769	-2.7354	1	0.91498	-5.4796	0
Ces2g	0.1014	-0.3633	3	0.24523	-1.7958	1	0.56896	-3.4878	1	0.12407	-2.3242	1
Gm98	0.10147	-0.46098	2	0.99398	-3.9174	0	0.26628	-1.9045	1	0.20749	0.27385	3
Rps6ka2	0.10147	1.0996	3	0.70255	-1.6691	0	0.83151	-2.5326	0	0.84037	-3.1849	0
Gpr61	0.10149	0.30506	3	0.22345	-0.63351	1	0.48007	-4.8692	1	0.71667	-3.5266	1
Ttpa	0.10153	-1.0431	3	0.013253	-1.6925	2	0.7986	-1.6385	1	0.26431	-0.72717	2
Asgr1	0.10156	0.48909	4	0.10828	-0.50667	2	0.82122	-4.0775	0	0.82875	-1.8885	1
Serpina1e	0.1016	-0.071848	2	0.85761	-2.0022	0	0.7155	-0.22801	1	0.12558	-1.6778	2
Psmd10	0.10165	0.59555	4	0.6796	-1.4879	0	0.35337	-3.6285	1	0.79317	-0.66289	1
Fscb	0.10179	0.15773	2	0.018759	-3.1089	2	0.57011	-0.47993	1	0.025192	-0.799	2
Nup50	0.10183	0.46891	4	0.62541	-1.4103	0	0.75113	-3.1263	1	0.54687	-1.6053	1
Uap1l1	0.10199	-0.25172	3	0.78494	-1.0174	0	0.47635	-2.2237	2	0.17848	-0.29896	3
CTRLMM_66998	0.1021	1.8503	1	0.38754	-2.7451	0	0.59438	-4.924	0	0.4811	-1.2394	0
Elovl1	0.10217	0.65532	3	0.89805	-3.4733	0	0.7724	-1.4426	0	0.14294	0.66108	3
Arf3	0.10222	-0.044181	2	0.87982	-2.8759	0	0.69178	-2.6345	1	0.71325	-1.2266	1
Tmem154	0.10226	0.90836	3	0.24019	-1.8833	1	0.62206	-0.13294	1	0.63812	-0.54262	1
Hook1	0.10229	-0.5855	1	0.30097	-0.63351	1	0.054204	-0.89367	1	0.0068387	1.4297	4
Slc27a2	0.10233	-5.2729	2	0.75369	-2.9817	0	0.59304	-0.31953	1	0.76688	-0.41321	1
Bche	0.10242	0.49071	3	0.36524	-1.237	1	0.51374	-1.3238	1	0.1876	0.13603	3
CTRLMM_66455	0.10247	1.8029	1	0.0010018	3.4508	1	0.12273	1.7344	1	0.74482	-7.2849	0
Rhox2f	0.1025	0.69551	3	0.28951	-4.3011	1	0.5719	-3.2708	1	0.32662	-6.8459	2
Lao1	0.10254	-1.4456	3	0.59909	-2.2534	1	0.92645	-1.5554	0	0.77436	-2.749	1
Slc22a22	0.10257	0.697	4	0.83947	-3.0338	0	0.65226	-2.927	1	0.64518	-0.74767	2
H2-Ke2	0.10258	-3.1185	2	0.7133	-1.0912	0	0.37298	-2.3715	2	0.7166	-4.7782	1
Ptprh	0.10259	0.69706	4	0.96238	-5.8449	0	0.77635	-1.6396	1	0.386	0.25158	3
4930433I11Rik	0.10262	-2.6829	1	0.88074	-7.1615	0	0.54389	-1.3962	1	0.8246	-0.59425	0
Themis2	0.10266	0.62988	4	0.13533	-2.9395	2	0.078527	0.44401	3	0.86886	-0.25715	1
Gm5635	0.10278	-1.4148	3	0.53138	-3.8333	1	0.24328	-1.86	3	0.19661	0.2315	3
Slc5a12	0.10287	0.85922	3	0.24073	-1.1645	2	0.93806	-2.7555	0	0.1182	-0.35326	2
Cyp4f13	0.10303	-0.45925	2	0.59622	-7.6381	1	0.98518	-4.279	0	0.045431	0.54163	3
Pde1c	0.10315	0.43121	4	0.60534	-1.9389	1	0.27346	-3.7635	1	0.62512	-0.67098	2
Aox4	0.10317	0.88863	3	0.8469	-5.7716	0	0.43213	-0.64948	1	0.31559	0.084762	2
Osbpl3	0.10318	-3.9379	1	0.23501	-0.59627	1	0.56163	-4.0796	2	0.3599	-0.16346	3
Tomm20l	0.10319	0.67791	4	0.56255	-1.9456	1	0.94901	-4.1871	0	0.82264	-0.66795	1
Lrp2bp	0.1032	0.62211	4	0.59412	-1.5227	1	0.065196	0.73781	3	0.077121	-0.13455	2
Acsbg1	0.10321	-3.0585	2	0.013856	-1.3217	2	0.029638	-5.9627	1	0.34446	-0.10673	3
1110012J17Rik	0.10325	0.61075	4	0.76603	-5.0459	0	0.69696	-1.7406	1	0.13168	-0.018166	3
Gas2l1	0.10334	0.4207	3	0.62836	-3.6925	0	0.52664	-3.2852	2	0.18933	-0.082319	2
CTRLHS_57583	0.10342	1.5322	1	0.31238	-1.0428	0	0.50056	-2.1358	0	0.078391	1.636	1
Npr3	0.10342	1.5189	2	0.60643	-2.6297	0	0.57283	-0.85243	0	0.14392	-0.02187	1
Phox2b	0.10343	1.3803	2	0.12626	-1.4342	1	0.89638	-4.0786	0	0.0057746	1.1087	3
Acsm2	0.10355	0.60998	4	0.36937	-5.9566	1	0.96283	-3.8567	0	0.77909	-2.1174	1
Rtn4r	0.10363	0.64149	3	0.40182	-2.7094	1	0.87588	-5.4126	0	0.85523	-3.1002	0
Gtpbp1	0.10368	0.9617	3	0.56326	-2.8525	0	0.095083	-2.9599	1	0.84913	-1.3656	0
Dpt	0.10374	-1.2315	2	0.63591	-4.9203	0	0.27566	0.26615	2	0.20914	0.46604	3
Cer1	0.10377	-2.2219	2	0.10124	-0.88237	3	0.16014	-1.1111	3	0.12381	-2.4271	1
Ddx6	0.1038	0.49473	4	0.42899	-7.3139	1	0.0028319	1.1753	5	0.36529	-0.93424	2
Wdr45	0.10383	-0.20835	3	0.8144	-3.098	0	0.18394	0.42959	3	0.021922	1.229	4
Hivep3	0.10386	0.39875	3	0.90699	-2.3373	0	0.52338	-0.47823	2	0.66861	0.015701	2
C130022K22Rik	0.10391	1.0689	3	0.81621	-5.6903	0	0.63833	-0.63676	1	0.91125	-4.6764	0
Trpc1	0.10403	-0.39351	2	0.77228	-2.7191	0	0.45343	-4.9908	1	0.077469	0.95328	3
Cldn16	0.10411	1.0175	3	0.27863	-2.2278	1	0.095774	0.079279	2	0.26855	0.35959	3
Decr2	0.10413	0.62089	4	0.41944	-4.0738	1	0.72393	-3.8106	1	0.0068325	-0.18009	2
CTRLHS_57237	0.10429	1.6846	1	0.6361	-7.3823	0	0.163	1.1327	1	0.65747	-3.0997	0
Tmed9	0.10429	-2.0797	1	0.79362	-3.1977	0	0.78431	-1.5232	0	0.86333	-0.93362	0
Fbxo48	0.10434	0.57593	2	0.62138	-5.5046	0	0.76571	-4.7237	0	0.11039	0.51399	3
Atg13	0.10435	0.72061	3	0.19294	-0.11845	2	0.15713	0.28492	3	0.52269	-0.41661	2
Gm13547	0.10439	-0.19199	2	0.29245	-0.75315	1	0.4695	-1.0747	2	0.10389	1.2047	3
Card10	0.10444	0.63413	2	0.66107	-4.8975	0	0.64828	-1.4082	0	0.15637	1.0002	1
Pus10	0.10451	-0.35964	3	0.66454	-1.3269	0	0.28548	-0.73484	3	0.91604	-0.28693	0
Lrrc2	0.10452	0.51476	4	0.85088	-1.6858	0	0.97118	-4.1923	0	0.66149	-0.49185	2
Tcp1	0.1046	0.79742	3	0.41925	-1.3741	1	0.4475	-1.7153	2	0.044544	0.89135	3
Cypt3	0.10462	0.37203	3	0.43548	-7.7387	1	0.78727	-3.7855	1	0.87069	-1.6038	1
Aasdhppt	0.10465	-2.2956	2	0.26692	-2.6346	1	0.05473	0.55902	3	0.46122	-3.1138	1
Letm1	0.10465	-0.24561	2	0.78643	-1.1989	0	0.68361	-1.3956	1	0.49598	-0.97607	2
Nkiras1	0.1047	1.0026	3	0.79954	-2.6459	0	0.57704	-0.77742	1	0.15117	-1.635	2
CTRLHS_57279	0.1047	1.687	1	0.20215	-0.20743	0	0.61851	-4.4995	0	0.14594	1.2392	1
Zfp820	0.10477	-3.7117	2	0.61455	-4.0321	1	0.030796	1.0786	3	0.39606	-4.2317	2
Tapbpl	0.10483	-0.088584	3	0.4549	-2.669	1	0.92322	-3.3792	0	0.66837	-2.4343	1
Tdp1	0.10486	-0.14367	1	0.61551	-0.94006	0	0.57831	-5.787	1	0.93836	-0.89003	0
Ssna1	0.10489	-0.82618	3	0.6112	-1.6968	0	0.090456	0.74507	3	0.12834	-1.3031	2
Aff2	0.10495	-0.80627	1	0.17226	-2.1241	2	0.99946	-6.7011	0	0.79206	-0.57568	1
Nxf7	0.10501	0.060158	3	0.31866	-2.1736	1	0.35966	-2.6827	2	0.25796	-0.65991	3
Mtmr9	0.10503	0.83359	3	0.95857	-3.9243	0	0.54897	-3.6871	1	0.74651	-1.4079	1
Add2	0.10506	0.5493	4	0.16216	-0.12643	2	0.35261	-3.5535	2	0.58733	-3.1705	1
4921511H03Rik	0.10507	-0.60741	3	0.59352	-4.7006	1	0.54454	-2.3992	2	0.92063	-0.27293	0
Egln2	0.10518	0.41584	3	0.19162	-1.5132	2	0.5744	-0.62952	1	0.48647	-0.78258	1
Ttbk2	0.10519	-0.72501	2	0.089592	-2.4203	2	0.65716	-1.9501	1	0.77641	-0.39222	1
Atp6v1g1	0.10519	0.88893	4	0.9623	-6.9777	0	0.45527	-4.1804	2	0.87171	-6.8382	1
Vmn2r52	0.10521	-1.7714	2	0.23039	-0.10076	2	0.51343	-0.76116	2	0.83902	-1.8246	1
Surf6	0.10524	0.44895	3	0.64715	-7.5193	0	0.1176	0.3903	3	0.50827	-0.34115	2
Ccdc124	0.10526	-1.5945	2	0.3942	-3.6537	1	0.75694	-3.1397	1	0.13354	0.42396	4
Ccdc7	0.10533	0.50631	4	0.30269	-4.5501	1	0.62484	-4.0581	1	0.29872	0.030903	3
B4galt1	0.10537	-1.0368	2	0.022202	-2.7037	1	0.43887	-1.3743	2	0.89008	-1.7738	0
Ms4a6c	0.10542	-0.3275	2	0.20964	-5.1326	2	0.8752	-4.9993	0	0.27136	0.26609	3
Gm9513	0.10543	0.99446	2	0.26773	-0.6256	1	0.85253	-1.7256	0	0.17655	0.70747	2
[truncated: 17,121 more rows]

## Sheet: D6_sorted_vs_D6 unsorted
	mCherry_high_D6			mCherry_low_D6			BFP_high_D6			BFP_low_D6
Gene name	adj.P.Val	logFC	good sgRNA	adj.P.Val	logFC	good sgRNA	adj.P.Val	logFC	good sgRNA	adj.P.Val	logFC	good sgRNA
Kat5	2.6527e-07	3.2209	4	0.9873	-4.8946	0	0.56597	-1.0074	1	0.1836	-0.62381	1
Huwe1	2.6527e-07	3.269	5	0.86062	-6.1988	1	0.23003	-2.913	1	0.80254	-6.4448	1
Urod	2.6527e-07	3.6096	4	0.92595	-6.1316	0	0.082507	1.3888	3	0.9114	-1.524	0
Dmap1	1.8569e-06	3.7576	3	0.34662	0.16593	2	0.00069558	2.7967	4	0.90385	-6.8948	0
Ep400	1.8569e-06	2.3241	5	0.98409	-4.652	0	0.086835	0.53267	4	0.9081	-6.9006	0
Taf7	1.8569e-06	2.9891	4	0.008026	1.3595	3	0.10769	1.1721	3	0.94225	-6.8046	0
Hsp90b1	2.918e-06	2.7099	6	0.24559	-6.4034	1	0.27362	-0.72858	3	0.46817	-2.5118	2
Taf2	5.5707e-06	5.1176	1	0.31617	0.14099	0	0.082292	1.7175	2	0.76569	-5.6937	0
Dolpp1	1.5916e-05	2.1016	5	0.7324	-1.2544	1	0.080059	0.52383	4	0.72152	-2.8095	1
Ddx23	2.7323e-05	2.9391	4	0.59051	-4.3882	1	0.019663	-2.706	1	0.13102	-0.92583	2
Ddx6	4.9075e-05	2.0762	6	0.21452	-1.827	1	0.75057	-2.3334	1	0.26869	-5.656	1
Zfp87	8.0377e-05	2.4164	4	0.92312	-4.4571	0	0.74412	-7.1998	1	0.64225	-1.289	1
Zmat2	9.7885e-05	3.4735	2	0.43336	-0.70434	1	0.48255	-0.56613	0	0.79342	-5.2404	0
Ssu72	0.00014776	2.1263	4	0.92159	-2.612	0	0.31129	-3.1417	2	0.57187	-5.9905	2
Brd2	0.00015306	1.4791	5	0.20093	0.17684	4	0.3446	-0.87952	2	0.99455	-3.7856	0
Tmprss11a	0.00022203	2.0756	4	0.13086	0.4614	3	0.10284	0.25302	4	0.89231	-2.2782	0
Ermp1	0.00025758	2.2799	4	0.1785	0.61991	3	0.99636	-5.6281	0	0.10615	-1.4808	2
Gcn1l1	0.00028039	2.272	4	0.97202	-4.3687	0	0.16527	-2.7979	1	0.20142	-3.7435	1
Taf10	0.00029153	3.4809	3	0.40441	-4.4951	1	0.59812	-4.6481	0	0.70867	-4.64	0
Srp14	0.00030427	4.3217	1	0.58642	-4.4342	0	0.63121	-5.8167	0	0.0030555	3.3163	2
Chuk	0.00033292	1.1724	5	0.9717	-0.93335	0	0.067674	0.37875	4	0.53451	-0.44666	2
1810006K21Rik	0.00034565	3.0233	3	0.3519	-4.4331	1	0.51016	-0.61815	1	0.64795	-0.93004	0
Pdap1	0.0004056	1.8063	4	0.52232	-0.73362	1	0.3682	-1.7889	2	0.88929	-2.6603	0
Papola	0.00042205	2.0647	4	0.54114	-5.3224	1	0.77255	-1.1971	0	0.45531	-1.9966	2
Cnpy3	0.00043213	1.4698	5	0.96887	-6.9247	0	0.84136	-1.3692	0	0.57548	-2.0877	1
Mettl16	0.00047616	4.1974	1	0.22753	0.83295	1	0.2183	0.56102	2	0.37968	-6.7237	1
Lgals9	0.00047828	0.044564	3	0.060338	1.005	4	0.51734	-5.8419	2	0.18383	-3.7861	2
Ing3	0.00052922	1.9952	5	0.17602	-0.14507	3	0.68504	-0.79581	1	0.54878	-3.2663	2
Rbmx2	0.00059447	2.4618	2	0.84337	-4.5465	0	0.18028	0.12936	2	0.17918	-6.7205	1
Serpinh1	0.0006019	2.0441	5	0.93822	-4.061	0	0.18693	-2.4473	3	0.45079	-0.65002	2
Chchd1	0.00061198	-2.8834	1	0.90024	-1.3654	0	0.81419	-5.8174	1	0.3268	-1.8142	2
Ehhadh	0.0006783	2.0251	5	0.50406	-2.8287	2	0.16797	0.26827	3	0.3446	-0.14655	3
1190007F08Rik	0.00071385	2.6373	2	0.15418	-2.9769	1	0.41543	-0.83542	1	0.29141	0.12728	2
Krit1	0.00071491	1.6446	5	0.47988	-4.6631	1	0.3601	-2.9231	2	0.8045	-1.6107	1
Suds3	0.00072074	4.045	1	0.47024	-1.3567	0	0.45502	-7.2194	0	0.60712	-4.6317	0
Whsc2	0.00076531	3.8063	1	0.67226	-2.9975	0	0.55565	-4.0865	0	0.67552	-3.3462	0
Th1l	0.00078175	1.9071	4	0.065371	-0.84861	2	0.49802	-0.40012	1	0.33032	-4.8902	1
Prpf4b	0.00079184	2.3259	3	0.70464	-5.6235	0	0.62294	-2.8274	0	0.94121	-7.2038	0
Dohh	0.00082208	1.6963	5	0.55572	-2.8132	1	0.3792	-0.44075	2	0.82797	-6.9933	0
Hnrnpd	0.00089158	1.7088	4	0.5323	-3.013	1	0.61278	-3.3046	1	0.73121	-1.8548	0
Trrap	0.00089529	1.565	5	0.04016	1.375	4	0.055557	-0.28217	2	0.46816	-1.022	1
Ddx41	0.00093137	3.1506	3	0.70052	-0.5583	0	0.40776	-7.3047	1	0.59958	-0.38801	1
Tceb1	0.00098124	2.1081	3	0.42468	-0.70952	1	0.80115	-3.1513	0	0.90886	-7.0215	0
Plagl2	0.0010104	2.479	4	0.0070128	0.46742	3	0.12258	-3.4706	2	0.076372	1.0087	3
Ly96	0.0010969	1.5316	5	0.79204	-0.97949	1	0.15499	-3.2836	2	0.58512	-0.54306	2
March5	0.0011632	2.403	3	0.82273	-5.0865	0	0.049844	-1.0426	2	0.048811	-1.3303	2
Serpine2	0.0012486	1.5725	4	0.72098	-3.1184	1	0.21631	-0.74312	3	0.84606	-0.58725	1
Ube2l3	0.0012603	2.6751	2	0.19784	-2.7638	1	0.56955	-0.032909	1	0.317	-4.83	1
Cd47	0.0013203	1.1959	6	0.22859	-1.3582	3	0.82415	-3.5958	0	0.45784	-0.58011	2
Nln	0.0013712	1.1824	3	0.37581	0.16354	3	0.25967	-3.4173	3	0.8005	-4.044	1
Hist2h2be	0.001376	1.3075	4	0.91285	-2.8424	0	0.2291	-0.54115	1	0.5104	-2.8063	1
Celsr1	0.0013887	1.1059	3	0.54677	-1.7556	1	0.26632	-5.9737	2	0.61485	-0.31525	1
Ccnh	0.0014067	1.7768	4	0.97678	-5.2949	0	0.74582	-5.2031	0	0.70597	-6.0228	1
Mtap	0.0014635	0.27981	6	0.68785	-1.4756	2	0.74339	-1.8003	1	0.67271	-0.95984	2
Ddx51	0.0015038	3.8788	1	0.054014	2.1442	1	0.44816	-4.9106	0	0.5677	-3.7301	0
Gtf2f1	0.0015144	2.1332	4	0.19679	-0.54899	2	0.2505	-0.26815	2	0.83436	-6.0541	0
Slc35b1	0.0015277	1.0444	5	0.94683	-4.0202	0	0.83427	-5.9529	0	0.60845	-7.228	1
Smc1b	0.0016041	-1.4751	3	0.68419	-0.52721	1	0.9809	-6.7892	0	0.23162	-1.4737	2
Taf1d	0.0016052	0.067984	3	0.0023493	1.8032	4	0.04986	-1.4543	2	0.38889	-1.1722	2
Samt3	0.0016258	0.4207	3	0.40886	-0.23614	3	0.40647	-4.1911	2	0.56519	-1.7715	1
Aldoa	0.0016784	3.0394	2	0.73292	-3.7441	0	0.75102	-7.0184	0	0.91584	-6.9899	0
Rsl1d1	0.0016869	2.6328	2	0.86392	-6.1131	0	0.013575	2.5896	3	0.35752	-0.93799	1
Usmg5	0.0017468	0.32084	2	0.07564	1.2375	3	0.74931	-4.6431	0	0.21017	-0.24397	2
Dhx36	0.0018089	0.86654	5	0.38058	-1.0288	2	0.92699	-4.5853	0	0.027132	-0.16658	3
4931417E11Rik	0.0018328	1.7133	3	0.97525	-2.495	0	0.80362	-3.3698	1	0.42223	-2.7796	2
Sufu	0.0018434	2.1514	3	0.67741	-1.2737	1	0.7564	-5.9077	0	0.24998	-0.57265	2
Gm5741	0.0018948	2.4305	2	0.70671	-0.77382	0	0.87197	-8.2381	0	0.50751	-0.047137	0
Pla2g2f	0.0020185	-2.5317	1	0.95067	-2.7388	0	0.50658	-4.314	2	0.27549	-0.30887	3
Adnp	0.0022031	0.56152	3	0.78146	-1.2962	1	0.73457	-3.1095	1	0.55718	-5.3853	1
Zdhhc22	0.0022657	0.34508	6	0.67995	-1.3109	2	0.36135	-4.4835	2	0.75155	-2.8538	1
Taf6	0.0023681	2.6669	2	0.26158	-2.8948	1	0.47794	-1.6897	0	0.031911	1.4392	2
Fbn1	0.0023808	-2.039	1	0.9474	-5.9143	0	0.035792	1.3805	4	0.33955	-1.3277	3
Kbtbd10	0.0023856	2.031	5	0.25042	-2.329	1	0.016344	-3.559	2	0.14732	-1.3346	1
CTRLMM_67225	0.0024312	3.3249	1	0.42243	-0.55302	0	0.73415	-4.5198	0	0.062562	1.8574	1
CTRLHS_57485	0.0024556	3.0433	1	0.39938	-0.31816	0	0.83832	-2.623	0	0.80133	-1.8618	0
Rpp21	0.0024784	2.9478	2	0.023468	1.5579	3	0.11213	0.62773	2	0.30394	-3.6231	1
B3gnt4	0.0025511	0.74799	3	0.12256	-1.2981	2	0.91659	-7.4857	0	0.72216	-6.8779	1
Pet2	0.002557	1.3492	5	0.86913	-1.7853	0	0.043384	-5.4795	2	0.18721	-1.2682	2
Zfp111	0.0025649	1.3666	5	0.84413	-0.4301	1	0.86485	-8.3517	0	0.31322	0.20506	3
Slc4a7	0.0025761	1.8651	5	0.95687	-1.753	0	0.58128	-0.69549	2	0.29195	-4.5129	2
Necab1	0.0026206	0.97854	5	0.38282	-0.9723	2	0.68076	-3.8621	1	0.94702	-5.687	0
Gcfc1	0.0026509	2.6302	2	0.4018	0.13355	1	0.49954	-7.0045	1	0.90971	-2.149	0
Rpn2	0.0026578	2.0001	5	0.97479	-4.7322	0	0.35096	-1.719	1	0.70247	-5.3332	1
Alpk1	0.0026742	2.4854	3	0.46949	-2.2912	1	0.83844	-6.8429	0	0.73141	-4.9716	1
C130039O16Rik	0.0026922	1.191	5	0.31924	-0.062768	3	0.12911	-1.1986	1	0.062067	-2.2247	1
Sult1b1	0.0026922	-1.1107	2	0.63324	-1.0854	2	0.392	-5.6584	2	0.59823	-0.66247	2
Fam122a	0.0027453	1.9158	5	0.65186	-1.7171	1	0.01234	1.3047	4	0.95023	-1.7527	0
Il3	0.0027962	1.5772	5	0.35608	-1.0244	2	0.46375	-7.4859	1	0.7962	-0.94276	1
CTRLHS_57481	0.0030159	3.3009	1	0.083107	1.5869	1	0.73326	-8.0449	0	0.43095	-0.90748	0
Ahcy	0.0030764	1.305	4	0.47319	-0.73596	1	0.36143	-1.1375	2	0.25026	-1.8102	2
Anapc10	0.0030785	-6.8015	1	0.41779	-5.7228	1	0.27482	-7.0312	1	0.31171	-5.063	1
Ap1s3	0.0031077	1.1668	5	0.63467	-1.4391	1	0.5151	-0.70649	1	0.056549	1.1174	4
Ecd	0.0031734	2.9373	2	0.04403	-0.75694	1	0.17711	-2.5352	1	0.36464	-4.4348	1
Zfp334	0.0032063	-0.97697	2	0.23806	0.27357	3	0.95022	-7.7288	0	0.99009	-4.6125	0
Rnf7	0.0032143	0.81794	5	0.21912	-1.931	2	0.32839	-7.0251	2	0.16751	0.22461	3
Abtb2	0.0032472	1.1854	3	0.18771	-1.3749	2	0.080462	-5.6772	1	0.92538	-4.1225	0
Frmd4b	0.0032594	-0.69525	3	0.55438	-3.6017	1	0.49891	-0.43889	1	0.88198	-6.8021	0
Pdha2	0.0032896	1.4797	5	0.99576	-5.7489	0	0.2699	-6.4852	2	0.84379	-3.4185	1
Lhx5	0.0034254	1.4846	4	0.28527	0.1197	2	0.47412	-4.2913	1	0.44729	-0.31811	1
Senp5	0.0034276	1.2315	4	0.86742	-0.58045	1	0.0065008	0.72484	5	0.95606	-2.051	0
Tlr4	0.003443	1.343	5	0.91786	-2.8443	0	0.5131	-0.62835	2	0.66496	-0.87177	2
Clnk	0.0034467	0.88235	5	0.12791	0.54041	3	0.56163	-0.96825	1	0.28764	-3.1104	2
Fam159b	0.0035382	2.544	2	0.96829	-3.3415	0	0.71324	-7.588	0	0.67385	-1.641	0
Lpcat3	0.0035873	1.8107	4	0.90321	-2.1371	0	0.536	-6.6368	1	0.46968	-1.0821	2
Irf3	0.0036928	1.4232	5	0.33039	0.24206	3	0.97879	-6.9216	0	0.60263	-1.6452	2
Hcn4	0.0037066	0.095267	2	0.52301	-0.73612	1	0.52097	-5.032	1	0.12612	0.52626	3
Irf9	0.0037104	1.1916	4	0.089293	0.481	4	0.99906	-2.5793	0	0.44463	-0.96209	1
Ano4	0.0037157	1.5713	4	0.22267	-1.7278	1	0.36102	-5.3161	2	0.50663	-4.4035	2
Ppm1d	0.0037252	1.3843	4	0.99339	-3.8049	0	0.64743	-0.64001	1	0.99445	-5.9953	0
Ramp2	0.0037974	1.1293	5	0.87622	-1.8592	0	0.69657	-3.8714	1	0.35591	-0.2546	2
A330070K13Rik	0.003834	-0.36822	3	0.56492	-2.7636	2	0.98826	-7.775	0	0.90413	-1.7638	0
Ensa	0.0038547	-1.6379	2	0.64898	-5.1924	1	0.6065	-5.5069	1	0.89558	-1.7865	0
Slc7a5	0.0038754	0.9575	4	0.46077	-0.22794	2	0.45464	-4.3567	2	0.10882	0.66075	3
Socs3	0.0039162	1.5081	4	0.73361	-1.3832	1	0.10807	0.78041	3	0.49716	0.0061009	2
Baiap2	0.0039751	1.02	5	0.99828	-3.3376	0	0.88289	-4.7252	0	0.37968	-0.083746	3
Pdzd7	0.0039926	-1.0314	2	0.36839	-4.0867	1	0.69534	-7.62	1	0.84809	-4.8255	1
Morn3	0.0040011	1.5841	4	0.35793	-0.591	3	0.40081	-7.9533	2	0.021525	1.3698	4
Gripap1	0.0041889	1.7183	4	0.11335	-1.0906	1	0.77328	-1.5934	0	0.091904	0.90589	3
Ggt5	0.0044377	0.90975	5	0.51823	-6.7839	1	0.71739	-7.115	1	0.90141	-2.3086	0
Fbxo31	0.0045136	-0.084024	2	0.22413	-0.24861	2	0.99058	-8.3317	0	0.97906	-5.9441	0
Ppp1r8	0.0045263	1.1625	5	0.7213	-0.36034	2	0.44589	-1.685	1	0.95668	-2.9537	0
Helz	0.0046881	1.3001	4	0.95101	-2.1095	0	0.46517	-1.9921	2	0.84557	-2.8444	0
Aarsd1	0.0047163	1.6327	4	0.97784	-4.1359	0	0.87318	-4.6888	0	0.093246	-0.25436	3
Gm101	0.0047332	2.1807	3	0.025563	-0.39313	2	0.39096	-4.5223	2	0.42359	-1.8831	1
Tmem9b	0.0048736	1.687	3	0.45185	-0.071441	2	0.072422	-0.089887	2	0.32738	-0.56074	2
Rfc5	0.004903	0.014131	2	0.46497	-1.0681	1	0.1949	-4.5941	2	0.10798	-4.5861	1
Gpatch1	0.0049439	1.7457	4	0.99863	-5.7569	0	0.62707	-3.5473	1	0.99679	-7.4117	0
Upp2	0.0050043	1.3481	5	0.66406	-1.5727	2	0.76005	-4.6606	1	0.764	-0.61937	1
Bcdin3d	0.0050956	0.94578	5	0.25144	0.090838	3	0.52745	-0.48646	2	0.72466	-3.6167	1
Atp2b1	0.0051296	0.34857	5	0.68699	-1.8172	1	0.98269	-7.8701	0	0.73924	-0.61396	1
B020004C17Rik	0.0053741	0.64815	3	0.78191	-2.8569	1	0.91723	-5.1327	0	0.29983	-0.041522	3
1700001L19Rik	0.0054293	2.7301	2	0.89212	-2.672	0	0.84018	-8.2301	0	0.70878	-2.4728	0
Mvk	0.0054373	0.83404	5	0.90413	-2.1143	0	0.14124	-1.343	2	0.71998	-1.1466	1
Gtf2h2	0.0054611	1.9625	4	0.03861	-2.3546	1	0.69247	-3.7627	0	0.55507	-4.9716	1
Cyp2c70	0.005484	0.68881	3	0.99125	-1.7388	0	0.82094	-6.7586	0	0.92009	-4.9449	0
Acmsd	0.0055285	0.86019	3	0.071343	-2.1013	2	0.30181	-7.6161	2	0.55427	-2.5849	2
Taf5	0.0056123	2.6917	2	0.48467	-3.2494	1	0.66456	-6.0219	0	0.81606	-7.133	0
Btbd11	0.005624	2.2555	2	0.42469	-0.40791	1	0.16169	0.77529	2	0.81535	-0.8649	0
Glce	0.0056272	-0.38577	2	0.68501	-0.40851	2	0.43135	-3.8297	2	0.79245	-1.7285	1
Cox18	0.0056511	2.2084	3	0.30676	-0.76012	2	0.90979	-7.3016	0	0.037824	0.7631	3
Dnaic2	0.0056797	-1.3539	2	0.89146	-3.9744	0	0.94642	-7.2175	0	0.096092	0.73203	4
Rpn1	0.0056887	2.0631	4	0.21236	0.077954	2	0.64818	-0.66315	1	0.18836	-2.158	1
P4ha3	0.0057821	1.4179	4	0.56781	-0.69136	2	0.47162	-1.8506	2	0.29225	-1.0797	2
Axl	0.0057938	0.30211	3	0.19257	0.063682	3	0.74808	-3.395	1	0.95446	-1.9487	0
CTRLHS_57253	0.0058251	3.1334	1	0.25614	0.48538	1	0.035706	2.5899	1	0.23893	0.42445	1
Celsr3	0.0059599	-1.0732	2	0.79079	-1.6127	1	0.95613	-7.0254	0	0.77098	-5.6872	1
Akr1b7	0.0060262	1.8667	3	0.49375	-1.5687	2	0.84125	-5.6715	0	0.98309	-4.6302	0
Fga	0.0061349	1.9479	4	0.98212	-2.237	0	0.96616	-2.3902	0	0.099522	0.84546	3
Mnat1	0.0061604	1.1611	5	0.57109	-0.90186	2	0.92378	-7.5168	0	0.59069	-1.6621	1
Ddost	0.0061864	2.3781	2	0.3865	-2.9112	1	0.19915	0.71068	2	0.88073	-7.0583	0
1600027N09Rik	0.0062739	2.0181	4	0.25154	-5.7503	1	0.17477	0.387	3	0.70249	-0.99838	1
Erich6	0.006319	-2.0881	1	0.080604	1.4574	2	0.83881	-6.3879	0	0.7687	-4.6068	0
Ifna11	0.0063779	2.4278	3	0.061645	-0.39002	1	0.26656	-1.1284	2	0.98045	-5.1755	0
Pggt1b	0.0064989	1.9945	4	0.82732	-1.0161	0	0.43536	-5.2039	1	0.46558	-3.7487	1
Azi2	0.0065535	0.94691	4	0.060587	-1.0082	2	0.39723	-2.1446	1	0.73622	-1.4011	0
Stx5a	0.0065748	2.7676	2	0.21862	0.18426	1	0.16784	-1.6958	1	0.85191	-4.6414	0
Cog4	0.0066103	0.60873	1	0.42351	-3.1118	1	0.076082	-2.0919	1	0.85309	-6.0153	0
Arhgap21	0.0066119	0.042655	2	0.35082	-0.63235	3	0.84807	-7.3271	0	0.93233	-2.7616	0
Gpr15	0.0066135	1.2888	4	0.34435	-0.030523	3	0.40758	-6.4913	1	0.95547	-3.8633	0
Tril	0.0066819	-6.7569	2	0.033812	-3.6558	2	0.011857	-3.111	2	0.71159	-3.2538	1
Acsbg2	0.006726	1.1228	5	0.99858	-3.501	0	0.77957	-7.8461	1	0.14549	0.38318	4
Cby1	0.0067323	1.4745	5	0.399	-2.7401	2	0.7176	-1.8011	1	0.33703	-1.1228	1
Bard1	0.0067705	0.39441	5	0.32315	0.17369	3	0.97881	-2.8478	0	0.6424	-0.65135	1
Actl6a	0.0067838	1.996	3	0.084456	1.4615	2	0.38052	-0.19188	2	0.14156	-6.0302	1
Fbxw26	0.0067933	-1.0272	2	0.82179	-1.5961	1	0.29811	0.043822	3	0.21321	-0.14466	3
Ube3c	0.006874	0.79071	5	0.45245	-4.1572	2	0.032929	0.49606	4	0.27047	0.13996	3
Farsa	0.006927	2.9541	1	0.31303	0.11819	0	0.81177	-8.2386	0	0.76511	-2.7167	0
Zmynd17	0.0069339	-0.55818	2	0.37712	-1.4495	2	0.34381	-2.5991	2	0.51269	-2.8578	1
Gm1527	0.0071037	2.2155	3	0.11702	-0.5431	2	0.26774	-7.9165	1	0.99093	-3.4661	0
Qrich1	0.0071079	1.4091	5	0.87799	-3.7394	1	0.5136	-1.5105	2	0.99208	-4.8307	0
Wdr77	0.0071244	-0.46709	2	0.60884	-5.0116	1	0.60247	-1.6766	1	0.7525	-3.6137	1
Ivd	0.0071504	1.8853	3	0.10977	-3.4725	1	0.3786	-1.5703	2	0.698	-1.6162	1
Smad1	0.007187	1.4789	4	0.70381	-1.1168	1	0.04637	0.075801	3	0.17734	-0.012604	3
Fam100b	0.0073064	1.7097	3	0.56496	-0.043645	1	0.55137	-6.8197	1	0.37498	-0.6539	2
Brd8	0.0074549	1.2597	4	0.55923	-1.225	1	0.10509	0.75473	4	0.9327	-6.244	0
Qrfp	0.007526	0.7473	3	0.64915	-3.0283	1	0.20771	-0.78819	3	0.86803	-2.5394	0
Nsfl1c	0.0075287	1.326	3	0.90263	-1.8293	0	0.28504	-5.3069	1	0.89425	-4.2925	0
Mtap1s	0.0075992	1.525	4	0.13718	-1.1598	3	0.042759	-2.5609	2	0.10702	0.31379	4
Csnk2a2	0.0076141	1.1917	5	0.48366	-0.28737	1	0.16373	0.47146	3	0.63947	-2.3787	1
Hnrnpa1	0.0077006	3.2584	1	0.71526	-7.0914	0	0.62343	-7.1525	0	0.78215	-5.8444	0
Fam131b	0.0077085	-0.10494	3	0.71936	-2.7675	1	0.76325	-1.7119	1	0.3005	-3.7307	2
Npr2	0.0079191	0.90588	5	0.94029	-1.7494	0	0.68135	-1.8632	1	0.86392	-2.0698	0
Ltbr	0.0080316	0.10499	2	0.49667	-0.062592	1	0.090102	-7.3976	1	0.033248	-1.5091	2
Tet3	0.0080385	1.658	4	0.62048	-0.64866	1	0.40187	-5.8255	2	0.17724	0.50391	3
Mpi	0.0080672	1.2245	3	0.16447	0.31737	3	0.99135	-4.2357	0	0.28552	-0.52025	2
Trim27	0.0080799	0.9554	5	0.94183	-2.7834	0	0.23458	-2.8399	3	0.28744	-0.90039	3
Ifitm10	0.0080948	1.4715	4	0.34108	-1.5003	3	0.36521	-0.76807	2	0.37326	-0.68563	2
Rgsl1	0.0081176	-4.0264	1	0.65831	-0.82101	1	0.051975	1.3842	3	0.99594	-5.5352	0
Tbl1x	0.0081584	0.65856	5	0.76207	-0.40957	1	0.79459	-1.2483	1	0.89331	-1.1609	0
Cenpw	0.0082343	1.2029	5	0.51398	-1.258	2	0.45114	-2.8666	2	0.15824	-3.4075	1
Coq9	0.0082444	-1.3306	2	0.041573	-0.9683	2	0.099328	-5.7354	1	0.51765	-3.2884	2
Eif5a2	0.0082704	1.3267	4	0.092138	-0.92627	2	0.78471	-2.7102	1	0.97097	-5.5678	0
Med16	0.0082873	-1.737	1	0.98783	-7.3781	0	0.55177	-7.16	1	0.39639	-5.1223	1
Brf2	0.0084003	3.36	1	0.63858	-6.7908	0	0.537	-4.2333	0	0.39602	-1.8962	1
Csf3r	0.0084624	-0.21511	2	0.50785	-0.022093	2	0.14293	0.45082	3	0.9581	-0.86035	0
Pkn2	0.0084937	0.98797	3	0.65595	0.012613	1	0.020692	1.9035	3	0.49279	-3.258	1
Pgk1	0.008637	1.3263	4	0.13908	0.3676	3	0.43543	-8.7334	2	0.5502	-1.294	2
Rp1	0.008742	-0.67616	3	0.43325	-2.6639	1	0.57135	-4.358	2	0.97969	-5.0677	0
Pappa	0.0087712	-0.37924	3	0.7774	-2.9677	1	0.051939	-3.244	2	0.57436	-3.7104	1
Tob1	0.0088014	-2.1039	3	0.97134	-3.9188	0	0.42166	-7.5847	1	0.09502	0.015865	3
Zbtb8os	0.0088115	2.8979	1	0.36017	-0.16251	0	0.68167	-3.5818	0	0.35099	-0.32485	0
Nhedc2	0.0088258	-2.2502	2	0.058343	0.54679	4	0.96388	-7.5402	0	0.90424	-3.8769	0
Bcas2	0.0088837	1.9306	3	0.70199	-1.76	1	0.79988	-2.9889	0	0.14061	-2.5681	1
Ttk	0.0089431	1.4421	4	0.14339	0.86673	3	0.39476	-1.0905	1	0.15787	-0.017425	3
Prmt1	0.009054	0.53097	5	0.017068	0.78404	4	0.1548	-0.41739	3	0.76066	-1.9066	1
Agpat1	0.0090651	1.3362	3	0.30562	0.28357	2	0.12849	1.3551	2	0.68677	-2.4546	0
Sema7a	0.0091251	0.54179	3	0.6521	-0.67329	2	0.23688	0.11	3	0.12165	-0.022955	3
Rp2h	0.0091283	1.4679	4	0.39833	-1.9231	2	0.42058	-6.7826	1	0.34153	-0.012218	3
Srd5a3	0.0091458	0.9033	3	0.81563	-3.574	1	0.09975	-0.52443	3	0.57757	-1.2038	2
9130204L05Rik	0.0091898	2.9318	1	0.45376	-0.78836	0	0.038653	0.73491	3	0.39817	-3.4608	1
AI597479	0.0092052	1.3855	3	0.67131	-1.8373	1	0.23336	-7.5825	2	0.52558	-0.49725	1
Clhc1	0.009262	0.25399	3	0.23454	-0.078764	3	0.6248	-7.6455	1	0.52265	-2.5425	2
Ube2v2	0.009324	1.5302	4	0.62598	-1.3002	2	0.0030457	-3.5784	2	0.36077	-1.5425	2
Ndn	0.0093521	1.4946	3	0.16913	0.45551	3	0.94186	-1.9121	0	0.53896	-0.74286	2
Armc6	0.0093712	-0.016094	3	0.55571	-2.2851	2	0.03006	-3.0421	2	0.20923	-0.13386	3
Alox12e	0.0095299	-1.9404	2	0.28526	-0.79707	2	0.68169	-3.976	1	0.79187	-2.0929	1
Prpf19	0.0096248	2.0529	3	0.60037	-1.4405	1	0.022683	-3.9506	1	0.88615	-4.4707	0
Nsun2	0.0096365	1.5353	4	0.5607	-2.1073	1	0.46504	-3.6753	2	0.97644	-5.186	0
Morc3	0.009645	-2.2798	1	0.57338	-1.0353	2	0.14571	-3.3657	3	0.78848	-1.7236	1
Ccar1	0.0097389	-1.1639	1	0.3698	-1.3706	1	0.6341	-7.5553	1	0.50304	-1.2725	2
Trim7	0.0098344	-1.1797	2	0.21258	0.46951	3	0.014907	1.2773	5	0.74577	-0.61428	1
Epcam	0.0098779	-0.038811	3	0.60772	-0.28692	2	0.58932	-1.9242	2	0.46813	-1.4242	2
Zfp953	0.0099103	1.1682	5	0.37295	-0.91834	1	0.18664	-1.011	2	0.39886	-1.966	1
Pkib	0.0099129	2.4647	2	0.47297	-0.75912	1	0.65958	-1.5658	0	0.11133	1.0762	2
Specc1	0.0099734	1.634	4	0.60286	-3.4472	2	0.13593	-1.9176	2	0.26207	-1.294	3
Mrpl30	0.0099883	1.8749	3	0.49155	-1.7261	2	0.34781	-7.1641	2	0.85933	-5.6378	0
Nipsnap3b	0.010115	1.9153	3	0.94104	-3.2751	0	0.81027	-2.962	0	0.77532	-2.7455	1
Krr1	0.010228	2.6938	1	0.86262	-2.6776	0	0.55127	-3.9122	0	0.7913	-6.4172	0
Vmn2r115	0.010309	-4.388	2	0.04013	-2.6389	1	0.42479	-2.0647	1	0.46802	-2.1356	2
E130311K13Rik	0.010474	1.2321	4	0.66084	-1.4175	1	0.54402	-6.105	1	0.98652	-4.6991	0
Mre11a	0.010513	2.0841	4	0.41312	-0.99063	2	0.44273	-0.82942	2	0.84388	-4.7279	0
Lrrc8d	0.010716	-6.9765	2	0.49318	-1.7621	2	0.76002	-7.9022	1	0.66585	-0.093515	2
Hdac3	0.010727	1.6253	4	0.58859	0.0050926	2	0.78548	-2.5888	0	0.87319	-1.1448	0
Mlf2	0.010728	0.8902	3	0.84781	-2.169	1	0.34107	-6.3834	2	0.81709	-7.1498	1
Ftsjd1	0.010742	0.68249	5	0.057343	-1.3195	2	0.51653	-2.6789	2	0.28771	-1.9056	2
Tnfaip6	0.010855	-1.6703	1	0.838	-3.7291	1	0.36772	-2.4306	2	0.46969	-7.9872	1
Slc25a15	0.010866	0.83536	5	0.56989	-0.28991	2	0.77577	-8.115	1	0.71615	-0.93369	1
Pbxip1	0.010931	1.4203	5	0.43778	-1.781	2	0.70073	-7.7277	1	0.15035	-0.092147	3
Ptk2	0.011241	1.3603	2	0.39618	-0.11584	2	0.3164	0.072537	2	0.82368	-4.3543	0
CTRLMM_67278	0.011395	3.0136	1	0.55566	-1.9341	0	0.57507	-7.6398	0	0.72297	-5.052	0
Rer1	0.011429	2.3595	3	0.384	-4.8313	1	0.88311	-6.7888	0	0.82296	-4.78	0
Las1l	0.011468	2.5436	2	0.032213	1.3119	1	0.49221	-2.0107	0	0.20204	-1.7661	1
Mmp20	0.011482	0.85963	3	0.80951	-2.405	1	0.63292	-4.9554	1	0.92962	-5.3285	0
Gpr88	0.011498	1.4617	4	0.11699	-2.9051	1	0.30403	-6.0447	2	0.90156	-1.3757	0
Osbpl7	0.011531	0.88975	5	0.48468	-0.31342	2	0.13777	-0.53159	3	0.22011	-1.7838	2
Dpysl4	0.011539	0.13369	3	0.34879	-0.76273	2	0.62462	-3.6561	1	0.21725	-1.1149	3
Acsl6	0.011589	1.1331	4	0.41396	-0.42376	2	0.28259	-3.0304	2	0.50914	-0.91058	2
Tekt1	0.011636	0.90979	4	0.15717	0.032117	2	0.041847	1.1162	4	0.30166	0.097145	2
Creb3l1	0.011673	0.67429	5	0.35184	-2.0559	2	0.17281	0.0017325	3	0.59958	-2.8094	2
Smg6	0.011692	-5.2725	1	0.91339	-3.0212	0	0.83131	-7.5263	0	0.022031	0.90463	3
Lhx6	0.011695	0.091222	1	0.83865	-2.8438	0	0.63809	-4.4383	0	0.63508	-2.7307	0
Atp4a	0.0117	-0.29513	2	0.65912	-1.135	1	0.47769	-2.037	2	0.23779	0.1915	3
Dctpp1	0.011736	0.86502	5	0.23208	-1.5894	2	0.46872	-1.3057	2	0.67325	-0.34147	2
Ppil1	0.011737	2.4242	2	0.085681	-2.777	1	0.051055	1.2362	2	0.22686	-3.3076	1
Fam170b	0.011758	-1.7214	1	0.39124	-2.7022	1	0.18158	-2.8173	2	0.45777	-5.1257	1
Lmcd1	0.011759	0.98185	4	0.19528	-0.11192	2	0.24144	-1.258	1	0.41923	-1.2214	2
Ppp1r7	0.01177	-0.92055	2	0.37562	-2.6935	1	0.89284	-6.0533	0	0.70598	-5.7447	1
Mapre1	0.011772	1.1096	3	0.095419	-0.4543	1	0.44434	-1.3886	1	0.64751	-1.3677	0
3110082D06Rik	0.011814	-2.6541	2	0.083907	-2.1698	2	0.56613	-1.9603	2	0.32835	-0.1596	2
Coro6	0.012007	0.92967	4	0.90579	-1.0035	0	0.16023	-4.9195	2	0.98518	-5.3381	0
Adcyap1	0.012018	1.643	3	0.3659	-2.3017	1	0.22528	-2.8485	2	0.67449	-2.5568	1
Vmn1r74	0.012048	-0.58096	2	0.21561	-0.30497	2	0.73278	-7.8615	1	0.24897	0.24473	3
Srrm2	0.012065	1.4437	5	0.85557	-5.0793	1	0.6224	-7.2643	1	0.52276	-1.5392	2
Tcp11l2	0.012101	1.0187	5	0.58442	-1.0938	2	0.42265	-7.2955	2	0.42545	-1.5185	2
Zmynd8	0.012105	0.83668	5	0.53722	-0.51984	2	0.58174	-1.1673	2	0.55885	-0.78697	2
Minpp1	0.012135	-0.66758	2	0.90052	-3.2554	0	0.39892	-6.2848	2	0.84148	-2.236	1
Atp5g1	0.012192	1.2529	3	0.61855	-7.0699	1	0.8762	-7.7812	0	0.10912	-0.64587	1
Il1f10	0.01221	0.12224	2	0.83094	-3.8778	0	0.080268	0.37716	3	0.4676	-1.6283	2
Igsf23	0.01224	1.3057	3	0.69849	-2.5695	1	0.41635	-0.85883	2	0.13038	0.55775	3
Ermn	0.012271	1.1952	3	0.93873	-2.8507	0	0.88383	-3.4291	0	0.084866	0.80314	4
Tyro3	0.012278	1.425	3	0.44566	-1.5662	2	0.6629	-3.2164	1	0.80643	-0.4834	0
H2afv	0.012286	-4.7117	1	0.62346	-0.94824	2	0.93442	-7.7936	0	0.85193	-1.3234	0
Cacna2d1	0.012379	-0.042425	3	0.11078	-0.68813	1	0.24988	-1.5292	2	0.37347	0.058584	3
Smarca5	0.012443	1.8213	4	0.20496	-2.5966	2	0.12486	1.091	3	0.037252	1.5752	3
Anapc13	0.012444	2.166	3	0.81373	-1.0969	0	0.48424	-3.052	1	0.99585	-8.1565	0
Foxe1	0.012478	1.6458	4	0.1497	0.46914	3	0.12248	-5.9673	2	0.95239	-1.4677	0
Lrguk	0.012548	2.2108	2	0.28084	-3.8019	1	0.77055	-2.1621	0	0.51921	-1.1978	1
Tubgcp2	0.012562	-1.7919	1	0.083769	1.349	2	0.77319	-7.0197	0	0.54032	-6.8713	1
Sorbs2	0.012599	-2.1374	1	0.82364	-2.4255	1	0.24781	-1.7882	3	0.6582	-1.5063	2
1700011H14Rik	0.012739	0.71708	3	0.030554	0.90759	4	0.073745	-2.3226	3	0.79131	-1.4792	1
Timm44	0.012767	1.3314	2	0.069378	-1.7736	1	0.8668	-6.729	0	0.33463	-1.7206	1
Rasgrp3	0.012767	1.1633	4	0.075297	-0.54364	2	0.87597	-4.9561	0	0.36672	-0.16508	2
Ppig	0.012826	0.7776	5	0.66652	-0.52241	2	0.015637	0.81502	5	0.63945	-1.5617	2
CTRLHS_57591	0.012828	2.5303	1	0.97365	-4.6693	0	0.78168	-2.5723	0	0.88314	-2.5616	0
Ccdc104	0.012877	0.44732	2	0.27111	0.30549	2	0.70838	-5.8835	0	0.7337	-3.042	0
Dbr1	0.012908	3.1419	1	0.65785	-6.8703	0	0.44314	-3.4467	0	0.14264	-0.60501	1
Gabpa	0.01294	0.92737	4	0.93985	-4.8914	0	0.47197	-5.8009	1	0.48616	-3.4275	2
Uhrf1	0.013	1.0103	5	0.10049	-0.80238	1	0.7829	-3.3927	1	0.17661	-1.4382	2
Slc40a1	0.013044	1.0947	4	0.14352	-1.7956	1	0.57833	-5.4277	2	0.3236	-7.2364	2
1700054O13Rik	0.013104	1.6307	3	0.509	-0.38151	2	0.30415	-0.45681	2	0.58532	-7.8613	1
Vhl	0.013178	1.9779	2	0.85271	-4.7222	0	0.032818	1.5778	3	0.91083	-5.0687	0
Gria1	0.013187	0.20899	3	0.5819	-1.2598	2	0.78113	-2.7443	0	0.51545	-2.1346	1
2410137M14Rik	0.013235	1.681	3	0.5457	-2.5325	1	0.72457	-4.554	0	0.35856	-4.7992	1
Adamtsl4	0.01326	1.1695	4	0.25309	-0.32894	2	0.66585	-7.5825	1	0.93118	-1.3283	0
Ccnb1	0.01332	1.3201	4	0.76745	-2.3781	1	0.7228	-2.2767	1	0.59898	-4.5972	1
Mrpl32	0.013416	-5.6973	1	0.13563	-0.45475	2	0.26029	-5.8321	1	0.47015	-2.2018	1
Ttc34	0.013435	0.50734	3	0.82775	-1.9387	1	0.97134	-2.7422	0	0.79773	-0.36354	1
Mga	0.013469	-2.1854	2	0.36232	-0.97783	2	0.67084	-7.1612	1	0.69426	-0.7325	1
Fstl1	0.013473	1.5438	4	0.77684	-0.75958	1	0.95619	-7.4624	0	0.9509	-4.6402	0
Rbms1	0.01356	0.94747	4	0.017674	-0.70136	2	0.29943	-3.2838	1	0.94787	-1.2462	0
Vmn2r17	0.013575	0.71161	2	0.36529	-1.9056	1	0.85956	-7.4297	0	0.43997	-4.7239	1
Ankrd61	0.013772	1.7706	3	0.77762	-0.8715	0	0.099616	1.1286	3	0.75407	-4.155	1
Ehf	0.013774	1.6474	3	0.47985	-0.8747	2	0.60962	-7.8342	1	0.42477	-0.39625	2
Cox19	0.013825	0.85928	2	0.97872	-2.7797	0	0.82337	-4.455	0	0.23139	-0.78871	2
Marveld3	0.013867	-3.0072	1	0.42943	-2.2085	2	0.79286	-7.0206	0	0.69627	-3.0439	1
Mtfr1	0.014036	1.006	3	0.66503	-5.5829	1	0.85834	-4.2601	0	0.63903	-0.93609	0
Erbb4	0.014038	1.1371	4	0.2785	0.26991	3	0.040648	1.2318	3	0.75655	-0.81031	1
Wbp2	0.014093	1.1013	4	0.34201	-1.1567	2	0.19374	-1.4536	2	0.2525	0.22981	3
Txnrd1	0.014129	1.3031	4	0.44363	-1.8075	1	0.47189	-1.8756	1	0.99209	-4.6787	0
Sbp	0.014154	0.34321	1	0.47655	0.037015	1	0.27851	-2.2779	1	0.77355	-4.542	0
Larp1	0.014291	1.1039	4	0.78682	-4.7531	1	0.022672	-3.1005	1	0.017266	1.045	4
Itgb1bp1	0.014332	0.99193	5	0.031329	-2.8159	2	0.77263	-5.057	1	0.25053	-2.3603	2
Zfp867	0.014404	-0.63782	1	0.79863	-2.0679	0	0.57122	-3.8794	1	0.72345	-3.6595	1
Odam	0.014478	-2.0788	2	0.53047	-2.1229	2	0.85018	-7.8392	0	0.64827	-2.4315	1
Spata9	0.01452	1.0374	3	0.44845	-1.401	1	0.52673	-4.7414	2	0.13617	-0.56893	1
Prrt1	0.01461	-3.1857	1	0.88044	-1.8225	0	0.064235	0.67954	3	0.71736	-3.2374	1
Sel1l3	0.014637	1.151	4	0.092311	1.0337	4	0.85172	-7.245	0	0.6933	-4.6075	1
Nbn	0.014716	1.182	4	0.30763	-0.10704	3	0.27598	-1.789	3	0.47714	-0.67349	2
Pcx	0.01474	1.5783	3	0.93658	-5.834	0	0.013468	1.2914	4	0.14738	0.60615	3
Tnfsf12	0.014769	2.4976	2	0.29381	0.31922	2	0.24225	0.14551	2	0.23076	-0.051552	1
Tuft1	0.014771	1.505	4	0.97326	-2.3885	0	0.52515	-3.794	1	0.9891	-4.5804	0
Ddrgk1	0.014796	-1.3829	2	0.58644	0.11179	2	0.0013531	-2.6511	2	0.33737	-2.5949	2
Mars2	0.014964	2.2274	2	0.36907	-1.5571	1	0.86526	-6.8555	0	0.57733	-1.9028	1
Fam19a1	0.014972	0.69751	4	0.37334	-0.67757	3	0.82577	-2.2088	0	0.028505	-0.090236	3
Cyp4a10	0.014984	-1.7282	2	0.60031	-1.1265	2	0.88591	-7.9135	0	0.57857	-0.94911	1
G6pc	0.015012	0.94637	5	0.49737	-0.6068	2	0.14228	0.1662	3	0.55462	-0.8239	2
2410141K09Rik	0.015136	2.3767	2	0.85096	-6.7076	0	0.41838	-3.3313	1	0.80735	-7.01	0
Lrfn2	0.015151	1.9759	3	0.22411	-4.0205	1	0.37335	-1.7437	2	0.44456	-1.3777	1
Lrrfip2	0.015183	-0.36354	3	0.59445	-1.5617	2	0.21726	-3.2681	2	0.20808	-0.32866	2
Fbxw24	0.015246	0.93851	5	0.84465	-4.4852	1	0.4579	-2.2805	2	0.77806	-3.3757	1
Rab3a	0.015251	-0.6384	2	0.87306	-2.5718	1	0.87286	-7.8413	0	0.15097	0.37777	3
Dapp1	0.015498	0.076769	3	0.76048	-1.5967	1	0.083625	0.29376	4	0.32777	-0.35651	3
Dstyk	0.015573	1.3743	4	0.37193	0.09781	3	0.69651	-5.8779	1	0.29924	-0.24386	2
5430419D17Rik	0.0156	1.9692	3	0.23497	0.50363	3	0.16916	0.0048784	3	0.83429	-0.95707	0
Aicda	0.015725	-0.34597	2	0.74259	-4.6232	1	0.42186	-6.0089	1	0.66861	-1.6945	1
Atoh8	0.015795	1.3835	3	0.092358	-1.5018	1	0.46652	-4.0179	1	0.75168	-3.6095	0
Rdh12	0.015842	-2.1232	1	0.43913	-1.6278	1	0.17308	-0.86553	1	0.23063	-0.10093	2
Csf2rb	0.015907	0.44727	5	0.17251	0.22362	4	0.46029	-2.2446	1	0.48044	-1.1064	1
Gcsh	0.01591	1.1741	2	0.23452	-1.4634	1	0.3082	0.36768	2	0.8871	-2.7539	0
Chrna1	0.015964	-0.31576	2	0.59839	-0.46672	2	0.69108	-6.2032	1	0.36585	-1.8336	1
Dnahc17	0.016011	0.7498	5	0.30651	-1.3567	2	0.84149	-1.7074	0	0.87983	-4.2858	0
Angel2	0.016091	0.52849	5	0.95618	-4.5676	0	0.10602	0.34629	4	0.77993	-4.6196	1
Pla2g12b	0.016171	0.38525	2	0.90793	-1.391	0	0.073577	0.92503	3	0.36651	0.047956	1
Cenpv	0.016211	1.1988	4	0.32689	-1.0038	3	0.333	-5.3572	2	0.97325	-4.5715	0
Afmid	0.01623	0.95581	4	0.15108	-1.5657	2	0.72243	-4.5876	1	0.32964	-0.66098	2
Penk	0.016244	1.1786	4	0.76771	-1.6758	1	0.19493	-2.0558	2	0.7643	-2.5611	1
Cited1	0.016325	0.4645	4	0.47023	0.090605	2	0.44134	-1.2695	1	0.15321	0.20649	3
Prmt5	0.016357	0.55801	5	0.51694	-1.3306	2	0.59331	-3.0729	2	0.39149	-3.7438	2
Ly6k	0.016359	-0.036663	2	0.33737	-1.5871	1	0.11265	1.1004	3	0.09635	1.0831	3
Fam105a	0.016378	-0.32455	3	0.10498	-1.1473	1	0.058282	0.62124	4	0.018315	1.1478	4
Acp5	0.01643	1.1686	3	0.97544	-1.0408	0	0.087287	-0.48801	2	0.29241	-0.63123	2
Zic4	0.016441	-0.27284	2	0.50491	-1.5302	2	0.85145	-4.9258	0	0.68121	-1.1289	1
Tut1	0.016569	3.0937	1	0.097442	1.7929	1	0.22881	-2.4693	1	0.71526	-4.6395	0
Il1rapl1	0.016613	0.9311	4	0.9845	-1.5179	0	0.096551	1.063	3	0.44011	-1.176	2
Rpl35a	0.016632	2.7799	1	0.82118	-7.4719	0	0.35649	-1.6669	0	0.77368	-7.7754	0
Lum	0.016672	1.279	4	0.28396	-0.46666	2	0.089394	0.68278	4	0.79767	-4.5343	1
Mboat1	0.016726	0.99544	4	0.12975	-1.9639	2	0.26253	-1.0093	2	0.65005	-0.5606	1
Nphp3	0.016776	1.2163	4	0.56558	-0.71313	2	0.35173	-4.2809	2	0.15647	-0.019497	3
CTRLHS_57723	0.016801	2.3668	1	0.74327	-1.5715	0	0.92435	-3.6828	0	0.38155	-0.40784	0
CTRLMM_66772	0.016833	2.761	1	0.10877	1.4616	1	0.57164	-3.7992	0	0.023001	2.598	1
Dnajc5g	0.01684	0.97303	4	0.4349	0.14364	3	0.17283	0.34372	3	0.33442	0.022615	3
Atp6v1h	0.016918	3.0957	1	0.46117	-1.3844	0	0.83299	-6.8837	0	0.87867	-3.0437	0
CTRLHS_57688	0.016964	2.3541	1	0.2035	0.63631	1	0.79613	-2.3189	0	0.59299	-1.1816	0
Tas1r3	0.016997	-0.81511	2	0.50257	0.031703	2	0.71367	-1.3744	1	0.25423	-1.5649	2
Ppp1ca	0.01712	1.1091	5	0.30836	0.064924	3	0.24976	-1.2915	2	0.37532	-1.1232	2
Spin2	0.017161	0.22564	3	0.18631	0.73456	3	0.053196	-7.5273	1	0.066731	0.59637	4
CTRLHS_57982	0.017209	2.4377	1	0.75213	-1.8344	0	0.063779	1.9932	1	0.54027	-1.1693	0
Rassf9	0.017221	1.7578	3	0.73807	-0.59086	1	0.8459	-7.1253	0	0.34967	0.16321	3
Yy2	0.017254	-0.84983	2	0.22907	0.50521	3	0.0046827	2.3716	3	0.56657	-4.7105	1
Sly	0.017373	2.8629	1	0.74769	-7.2115	0	0.62744	-7.2211	0	0.72077	-5.0112	0
Mcm6	0.017452	1.0033	4	0.6844	-2.0042	1	0.15916	0.5281	3	0.89299	-3.2374	0
Chrnb1	0.017485	0.6152	3	0.8007	-1.6202	1	0.29705	-1.1476	3	0.36459	-0.25554	3
Sox4	0.017574	-0.29036	2	0.96776	-2.6854	0	0.28558	0.18666	3	0.58939	-1.1794	1
Grik1	0.017601	-2.0697	2	0.38534	-1.2792	2	0.18275	-1.3305	3	0.26313	-1.7303	1
Hdac1	0.017603	1.6456	3	0.1483	0.5011	3	0.81106	-2.3885	1	0.20492	-1.1206	3
Fbrsl1	0.01765	1.1131	3	0.33782	0.12683	3	0.84814	-2.2971	0	0.84004	-1.8786	0
Krtap5-4	0.017666	-0.42779	1	0.42015	-0.78915	1	0.43345	-0.26409	1	0.88946	-5.2532	0
Psip1	0.017672	1.5727	3	0.98747	-2.5874	0	0.92635	-7.6527	0	0.99525	-5.793	0
Tmtc4	0.017724	1.7209	3	0.27157	0.2934	3	0.72838	-2.2906	1	0.59808	-3.917	1
AU019823	0.017733	1.3988	3	0.66972	-2.0042	1	0.97432	-7.5843	0	0.83927	-5.1704	0
Abhd12b	0.017742	-1.5262	2	0.74187	-2.9439	1	0.075426	-1.9657	2	0.87603	-4.7304	0
CTRLMM_67343	0.017747	2.7457	1	0.080982	1.6795	1	0.63738	-7.809	0	0.16182	1.0373	1
Ctdspl2	0.017765	0.5773	5	0.033255	-0.87703	3	0.28991	-0.78005	3	0.18516	-1.1293	3
Arhgap25	0.0178	1.0909	4	0.98171	-2.0699	0	0.39422	-3.8473	1	0.94273	-5.5128	0
Pop4	0.017821	3.0358	1	0.53726	-2.6133	0	0.25322	-2.5358	1	0.5774	-7.0641	0
Atf1	0.017874	-1.1554	3	0.85486	-1.6193	1	0.308	-1.8962	2	0.21777	0.1244	3
1110037F02Rik	0.017967	2.0062	2	0.33217	-1.1233	1	0.5131	-0.79278	1	0.43984	-8.2845	1
Sar1b	0.017995	1.614	3	0.77771	-2.3143	0	0.70487	-4.9469	0	0.8477	-2.5056	0
Ccin	0.018049	1.5685	4	0.81556	-1.1482	1	0.39123	-3.4235	2	0.48056	-1.299	1
Trim72	0.018083	0.055855	2	0.20873	-1.4016	2	0.71963	-3.6045	1	0.92789	-2.1917	0
6430571L13Rik	0.018119	-1.6304	2	0.11999	-1.2855	3	0.25922	-3.9147	2	0.87838	-5.4208	0
Sde2	0.018121	2.3029	2	0.031672	-2.0887	1	0.59804	-6.7894	0	0.64746	-7.3597	0
Pax1	0.018136	0.72583	5	0.61914	-2.0514	1	0.81309	-6.8703	1	0.6342	-0.73785	1
Vamp8	0.018152	2.1059	2	0.86843	-4.5224	0	0.42824	-1.5604	1	0.42894	-2.1177	1
Epc2	0.01824	0.81295	4	0.71964	-2.3736	1	0.094816	0.16141	3	0.91027	-1.461	0
Psors1c2	0.018316	-0.12703	2	0.38375	-0.034903	2	0.43615	-1.9232	1	0.92056	-2.1311	0
Myo9b	0.018367	1.6487	4	0.82085	-0.43953	1	0.4812	-6.193	1	0.59468	-1.8355	1
Syf2	0.018397	-0.25009	2	0.10938	0.70865	3	0.65647	-4.4377	1	0.8885	-3.0795	0
Pole3	0.018452	0.85588	4	0.82761	-0.094641	1	0.79842	-0.3333	1	0.65581	-1.3504	2
Dupd1	0.018514	1.4216	4	0.76098	-2.6323	1	0.86496	-4.1464	0	0.70932	-3.1134	1
Tmem30b	0.018654	-6.1478	1	0.56525	-1.1456	2	0.95974	-7.9317	0	0.5631	-1.215	2
Cdk4	0.0187	0.47981	4	0.59255	-1.2762	1	0.63058	-3.8104	1	0.62579	-0.33296	1
Nup210l	0.018758	1.5921	5	0.0051019	1.712	4	0.51587	-4.359	2	0.56383	-3.9121	2
Phgdh	0.018805	0.19993	3	0.97552	-1.9213	0	0.42873	-3.0588	1	0.80356	-7.0052	1
Riok1	0.018844	-1.5655	2	0.16088	-0.1877	1	0.83796	-7.3649	0	0.11122	0.50805	2
Vmn2r86	0.018922	0.70356	4	0.12269	0.50637	2	0.37047	-7.9571	1	0.64824	-0.80685	1
A830010M20Rik	0.018991	1.5487	4	0.64054	-2.1286	1	0.60733	-1.453	1	0.32209	-2.2801	1
Skint10	0.019169	-0.099078	2	0.37476	-0.49796	2	0.86056	-4.721	0	0.80625	-1.2212	1
Gtf3c3	0.019172	1.988	2	0.20431	-0.41726	1	0.49644	-6.7749	1	0.59541	-4.2555	1
CTRLHS_57751	0.019191	2.5999	1	0.8415	-4.2731	0	0.74824	-8.08	0	0.13432	1.1961	1
Pclo	0.019244	0.60874	4	0.34196	-0.33813	2	0.60516	-5.4507	1	0.35844	-2.1764	1
Zscan12	0.01935	0.318	4	0.17093	-0.90408	1	0.1719	0.61655	3	0.42416	-0.94317	2
Pgam1	0.019382	1.594	3	0.15634	-1.8499	1	0.084252	-2.4942	2	0.30456	-0.77281	1
Tmem87a	0.019399	0.54094	3	0.36346	-0.88797	3	0.0034128	1.1536	5	0.024641	-0.52692	1
Psen1	0.019576	1.1249	3	0.22271	-0.33925	2	0.31468	0.073409	2	0.79658	-1.0275	0
Stap2	0.019614	0.78038	4	0.66835	-1.6511	2	0.042986	-3.1851	3	0.84364	-1.9557	1
Rad51c	0.019669	1.3544	4	0.22916	-0.10946	2	0.33318	-4.1826	1	0.39571	-3.8202	2
Chi3l1	0.019745	-0.20984	2	0.99843	-3.6704	0	0.39404	-4.2623	1	0.89581	-3.6058	0
Nlgn3	0.019764	1.8539	3	0.89805	-1.7893	0	0.60503	-2.646	1	0.62001	-0.0057097	1
Pou3f1	0.0198	1.7974	3	0.65677	-0.91513	1	0.97605	-8.15	0	0.091461	-1.4206	2
Ptprn2	0.019827	1.0595	4	0.75768	-1.4202	1	0.32691	-1.8473	2	0.28551	-0.27549	3
Kcne1	0.019852	1.8761	2	0.1431	0.8747	2	0.83402	-4.9315	0	0.81361	-1.6074	0
Snf8	0.019872	1.3564	1	0.15278	0.44923	2	0.41877	-2.5467	1	0.90589	-4.9515	0
Csta	0.019911	-0.14651	1	0.91809	-6.1536	0	0.79815	-5.4842	0	0.91101	-5.1927	0
Igfbp3	0.019914	1.7617	2	0.87338	-3.8268	0	0.46372	-1.6724	1	0.42481	-0.28217	2
Cdc40	0.020024	1.617	2	0.87802	-4.4922	0	0.53642	-1.6375	0	0.114	0.92882	2
CTRLMM_67116	0.020038	2.7779	1	0.70588	-4.3084	0	0.20726	0.77662	1	0.64961	-3.5841	0
Capn1	0.020106	0.8556	4	0.87422	-2.6412	0	0.99593	-8.4303	0	0.54064	-0.0080824	2
Kansl3	0.020178	-0.79804	1	0.94587	-5.8934	0	0.78903	-7.141	1	0.15607	-3.6811	2
Ccdc151	0.020188	-0.53419	2	0.62871	-2.2909	1	0.086	-5.7009	2	0.95951	-1.3212	0
Crmp1	0.020247	1.3415	4	0.9449	-2.782	0	0.80986	-7.5632	1	0.74924	-1.6924	1
Dcaf8	0.020261	-1.1229	2	0.75482	-1.0255	1	0.52382	-6.5537	2	0.41737	-1.3017	1
Dus1l	0.020279	0.49672	5	0.19113	-0.19472	2	0.79417	-1.0041	1	0.59401	-0.013363	2
Bcl9	0.020483	0.71907	5	0.27756	0.1287	3	0.41914	-3.0612	2	0.62493	-4.0771	1
Slc35a4	0.020487	0.92052	4	0.092171	-1.3096	2	0.35773	-1.2051	2	0.16625	-3.012	1
Srrd	0.0206	1.5543	3	0.0095448	-0.097573	2	0.92004	-7.1966	0	0.59492	-3.4957	1
Sh3pxd2a	0.020732	1.2507	3	0.58541	-0.54189	2	0.27517	-0.45965	3	0.32843	-1.0667	2
N4bp2l2	0.020786	-1.4762	2	0.48413	-0.87894	2	0.18336	-0.10287	3	0.083916	0.4394	4
Tnfrsf8	0.020867	0.6196	3	0.4085	-0.33999	2	0.24005	0.16467	3	0.27915	-0.18624	3
Acer2	0.020925	1.1612	4	0.82279	-1.2419	1	0.89925	-3.5763	0	0.79082	-3.3797	1
Mllt6	0.020935	1.5056	3	0.36734	-0.74625	2	0.7673	-7.7431	0	0.1461	0.5929	3
Car3	0.020957	0.60752	3	0.041608	0.32144	3	0.059195	0.55626	4	0.25471	0.13833	3
Ccdc136	0.020974	0.40974	3	0.37943	-2.2756	2	0.14026	-5.9006	1	0.67061	-1.2319	2
Sephs1	0.020978	1.579	3	0.88675	-6.1118	0	0.72898	-5.6895	0	0.84886	-3.676	0
Grk4	0.021121	1.5825	3	0.89755	-1.9181	0	0.31635	-2.2826	2	0.94764	-3.3494	0
Cd6	0.021128	1.0087	4	0.73727	-1.1085	1	0.93559	-4.1186	0	0.71568	-5.6503	1
Hs3st5	0.021144	0.6725	5	0.53151	-1.361	2	0.11992	-4.0009	2	0.84133	-0.55893	1
Kynu	0.021163	0.48858	5	0.43982	-0.069214	3	0.17011	-0.24218	2	0.37314	-0.010391	3
Fbxw21	0.02126	0.4479	3	0.12064	0.68372	4	0.97219	-7.2135	0	0.63286	-3.3029	2
Taf1	0.021298	1.1547	3	0.51877	-0.045237	1	0.03892	2.3913	2	0.82992	-4.707	0
S1pr2	0.021307	-1.2181	2	0.70045	-1.9954	1	0.61327	-5.8104	1	0.33933	0.22908	3
Trim29	0.021324	1.545	3	0.19073	0.50145	3	0.77907	-2.6899	0	0.0031443	0.9709	3
Pabpn1	0.021326	2.9088	1	0.60727	-4.2584	0	0.4458	-7.1792	0	0.27314	0.23636	1
Gnrhr	0.021362	0.87827	4	0.065916	0.6573	4	0.085303	0.33529	4	0.77998	-1.5662	1
St7l	0.021466	-1.6511	2	0.44138	-2.8775	1	0.18947	-4.4292	2	0.76027	-0.35536	1
Cxcl14	0.021508	-1.3754	1	0.53635	-0.87996	1	0.59124	-7.6076	0	0.15778	-3.1194	1
Slc15a1	0.021516	0.32765	3	0.55418	-0.022762	2	0.42381	-4.1734	1	0.42147	-0.64317	2
3110002H16Rik	0.021554	-0.030811	2	0.39627	-0.23222	1	0.39541	-5.7139	1	0.46475	-2.4172	1
Oog2	0.021825	-3.3423	1	0.21776	-1.7249	2	0.50036	-4.2868	2	0.83257	-1.9041	0
Gpr153	0.021898	0.29191	3	0.67372	-0.0055291	2	0.40508	-5.8344	2	0.32309	-1.3696	3
Ano7	0.022136	1.2539	4	0.38446	0.22307	3	0.42577	-3.3025	2	0.0057139	1.561	4
Fam189a1	0.022174	-1.1199	2	0.46751	-0.61058	1	0.93406	-6.9074	0	0.30537	0.22733	3
Spock2	0.02226	0.92268	2	0.95348	-3.9583	0	0.18664	-3.2331	2	0.16341	0.60751	3
Chchd2	0.022321	2.8571	1	0.61789	-4.1034	0	0.15198	1.539	1	0.61681	-4.6686	0
CTRLHS_57433	0.022332	2.3404	1	0.36076	-0.14515	0	0.33672	-0.9389	0	0.9627	-8.5365	0
Ldha	0.022435	1.3485	3	0.68057	-0.98688	1	0.045084	-3.641	2	0.96717	-4.1181	0
Mob3a	0.022475	-0.10218	3	0.10012	0.64212	4	0.64982	-0.8212	1	0.7126	-1.637	1
Wdr52	0.022488	-4.2651	1	0.47508	-0.41747	2	0.93321	-7.2072	0	0.66118	-2.3214	2
Mag	0.022492	2.7828	1	0.38832	-0.44228	0	0.7403	-6.9583	0	0.77639	-6.7	0
Tpcn1	0.022501	1.0388	5	0.42267	-2.3767	2	0.055175	-1.239	3	0.55322	-2.6844	1
Dicer1	0.022575	1.5846	3	0.82006	-3.1131	0	0.28619	-2.8488	1	0.57985	-0.42459	1
Sbno1	0.022633	2.8276	1	0.029345	2.4036	1	0.54607	-4.6481	1	0.5504	-3.3897	1
Cyp21a1	0.022665	1.1481	3	0.066538	-1.33	2	0.16941	-7.7119	2	0.27582	-1.9165	2
Lrrc43	0.022665	1.1506	4	0.12994	0.60537	4	0.086493	0.3363	3	0.60155	-1.4223	2
Hspa2	0.022667	0.81625	5	0.13355	-1.6042	1	0.068659	-0.28285	3	0.77541	-2.4894	1
Tmem237	0.022728	0.034725	2	0.37736	-0.50847	2	0.6523	-7.115	1	0.66976	-4.2151	1
Wars	0.022733	1.5831	3	1.9363e-05	2.1709	4	0.3909	-2.0355	1	0.93119	-5.5284	0
Ifnar1	0.022741	0.43133	5	0.46064	-0.23129	3	0.42619	-3.4847	1	0.40828	-1.5359	2
Acaca	0.022822	0.19793	3	0.015888	1.0873	5	0.047254	-1.3318	3	0.19042	0.25219	3
Rims1	0.022837	1.6473	3	0.6544	-2.7436	1	0.36751	-7.8453	1	0.33415	-0.66014	2
Ispd	0.022841	1.3333	3	0.25185	-0.21363	2	0.2451	-3.3147	2	0.12128	0.75529	2
Rhob	0.022914	-1.4137	2	0.83914	-3.2458	1	0.32273	-3.5644	2	0.49407	-3.3678	1
Trpm3	0.022931	1.027	5	0.277	-0.058733	3	0.38896	-2.048	2	0.05274	0.64362	4
Lce1h	0.022947	-2.6121	1	0.5551	-4.8381	1	0.52876	-2.3439	1	0.88898	-6.0996	0
Epn2	0.022974	-2.3726	2	0.78243	-1.8974	1	0.43335	-2.5134	2	0.19136	0.13673	3
B3gat2	0.023004	1.2999	4	0.032535	-0.47207	2	0.4328	-5.5857	2	0.44967	-1.1804	1
Pde3b	0.023018	-3.478	1	0.9138	-1.7426	0	0.79061	-7.3399	1	0.59066	-3.4079	1
Grid1	0.023024	0.62462	5	0.50244	-1.3563	1	0.17887	-0.59034	2	0.25464	-1.6109	2
Map3k10	0.023045	0.18271	2	0.62566	-4.1949	1	0.075727	-1.8496	1	0.94461	-1.7675	0
Psma2	0.023128	2.903	1	0.0065661	3.0867	1	0.043936	2.8299	1	0.0034718	3.6428	1
Fbxw4	0.023245	0.38867	5	0.8444	-0.66142	1	0.71183	-3.8647	1	0.26676	-0.40289	3
Ptf1a	0.023277	-4.2946	1	0.85022	-2.4486	0	0.8455	-3.1244	0	0.92121	-3.0177	0
Ppfibp2	0.02336	-0.83724	1	0.88188	-1.1676	0	0.83613	-4.6338	0	0.67697	-1.134	1
Zfp60	0.023384	1.1054	4	0.84882	-2.1206	1	0.48276	-7.8407	1	0.20997	-0.44529	3
Kctd10	0.023392	0.38789	3	0.32231	-0.27671	3	0.61018	-5.7018	1	0.77943	-1.8653	1
Wdr5b	0.02341	1.0088	4	0.37911	-0.50294	2	0.11019	-0.4418	3	0.34197	-0.85345	3
Tktl2	0.023482	0.13347	3	0.55621	-0.34145	2	0.32919	-1.4793	2	0.7698	-2.3864	1
CTRLMM_66811	0.023545	2.5735	1	0.37943	-0.3123	0	0.66864	-5.6113	0	0.72796	-3.4991	0
Cryaa	0.023578	-0.86407	1	0.16181	0.00054358	2	0.90463	-2.4016	0	0.93305	-3.2073	0
Aig1	0.023638	1.7092	3	0.98748	-6.7862	0	0.70062	-5.6568	0	0.12749	-0.12831	2
CTRLMM_66886	0.02365	2.3441	1	0.22733	0.57709	1	0.89301	-8.475	0	0.95078	-8.4464	0
Aldoart1	0.023717	1.7276	3	0.77556	-0.81826	1	0.97728	-7.5726	0	0.56768	-0.17836	2
CTRLMM_66893	0.023773	2.5598	1	0.85156	-7.5815	0	0.67845	-7.9137	0	0.049233	2.1146	1
Adam23	0.02386	1.2024	3	0.90297	-1.8399	0	0.3587	-4.5902	2	0.8859	-2.731	0
Gcg	0.023944	0.78158	3	0.023636	-2.1259	1	0.16497	-1.8473	2	0.93565	-1.8367	0
Traf6	0.024051	0.31803	5	0.77504	-0.74469	1	0.49609	-2.6757	2	0.4045	-0.25415	2
Bves	0.0241	1.6241	3	0.72071	-3.946	1	0.16644	0.54262	3	0.92478	-3.2074	0
Fbxo42	0.024135	0.9058	5	0.34322	-0.8891	3	0.17556	-1.2109	3	0.15247	0.14568	3
CTRLMM_67212	0.024207	2.7111	1	0.28776	0.32535	1	0.53322	-7.5118	0	0.05772	2.1494	1
Cyth3	0.02423	0.90451	3	0.37072	-0.13752	3	0.99834	-3.9355	0	0.90777	-0.9201	0
Cdr1	0.024273	-0.1221	2	0.62944	-1.0024	2	0.94664	-7.0951	0	0.26467	-1.9685	1
Chst4	0.02438	-1.1644	2	0.32988	-1.8361	2	0.58936	-6.3806	1	0.92809	-0.95381	0
Nos2	0.024423	0.42489	5	0.30893	-0.86668	1	0.61772	-1.8993	1	0.20992	0.25767	3
Kcnj16	0.024425	1.2836	3	0.95073	-3.6689	0	0.51575	-7.7584	1	0.16745	-5.5783	2
Psmb1	0.024456	1.2469	1	0.41179	-0.67193	1	0.087767	-1.25	1	0.91045	-3.7264	0
Arpc3	0.024481	0.34125	3	0.69582	-0.45533	1	0.2321	-6.7066	1	0.28015	-4.119	1
Ippk	0.024498	0.71734	1	0.41981	-1.3409	1	0.78925	-7.0845	0	0.45918	-1.3102	1
Zfp273	0.024563	1.766	3	0.72224	-4.5978	1	0.051621	-8.1561	2	0.54279	-1.644	1
Edil3	0.024587	-1.7401	2	0.95578	-1.8185	0	0.10631	-3.6112	2	0.78875	-2.0325	1
Camk1g	0.024599	0.34188	5	0.982	-1.5908	0	0.50703	-1.1261	2	0.77263	-0.90632	1
Kif7	0.024633	1.376	3	0.76033	-0.30707	1	0.72197	-1.1345	1	0.023106	1.0727	4
Rcn3	0.024667	1.3637	3	0.78805	-3.5745	0	0.95527	-7.7351	0	0.66099	-0.64036	1
Cd37	0.024735	-1.6413	2	0.27657	-0.045384	2	0.011602	1.6394	4	0.91529	-4.9752	0
Sbf1	0.024849	-2.4184	1	0.81217	-2.2887	1	0.39736	-1.6149	2	0.34488	-0.30672	2
Myb	0.024911	-0.21719	2	0.59983	-2.0438	1	0.87514	-1.6296	0	0.73212	-1.8393	0
Polrmt	0.025012	0.48916	4	0.40685	-4.4065	1	0.3018	-1.2013	1	0.85897	-7.1267	0
2010111I01Rik	0.02513	0.83436	5	0.02353	0.67046	3	0.74107	-4.2874	1	0.88299	-1.3382	0
Rpp30	0.025145	-1.041	1	0.68259	-3.8439	0	0.10707	0.083396	2	0.92783	-3.062	0
Hnrpdl	0.025151	1.1021	4	0.98397	-2.5717	0	0.84531	-6.4115	0	0.14783	0.16342	3
Plekha6	0.025203	1.2081	3	0.68833	-0.46865	1	0.47333	-6.2073	2	0.68913	-3.7981	1
CTRLHS_57520	0.025219	2.5313	1	0.39578	-0.42456	0	0.6734	-7.9019	0	0.57389	-1.973	0
Hmmr	0.025219	-1.1005	1	0.28716	-0.65045	2	0.57276	-2.1735	1	0.9731	-4.1995	0
Fkbp11	0.025241	-2.384	3	0.50974	-1.1357	1	0.73337	-2.5955	1	0.24954	-2.2513	1
Nob1	0.025266	2.506	1	0.35396	-0.13377	0	0.049576	1.7317	2	0.73449	-2.9529	0
Sec61a2	0.025268	1.5571	3	0.59833	-0.51566	2	0.2444	-0.5514	1	0.10116	-0.63947	1
Pitpnm2	0.025291	1.4907	3	0.29706	0.28061	3	0.4463	-0.43054	2	0.55535	-0.20487	1
Fes	0.025333	1.4179	3	0.90718	-2.1701	0	0.97517	-7.8702	0	0.18769	-0.67948	2
Vmn1r18	0.025393	1.3967	2	0.38098	-2.858	1	0.014178	2.2272	2	0.080248	1.0925	2
Wfdc16	0.02547	1.1525	3	0.006695	-0.84499	1	0.65459	-4.7062	1	0.19129	-0.73034	1
Cldn12	0.025505	-0.50258	2	0.20709	-5.5094	1	0.021554	-7.866	1	0.12848	-2.3233	3
Sec1	0.025533	-1.4126	1	0.39485	-0.26505	2	0.59749	-7.4926	1	0.69154	-2.3242	1
Larp4	0.025538	1.0082	5	0.24712	-0.32186	3	0.65853	-3.9282	1	0.92122	-3.7496	0
Por	0.025629	0.63146	5	0.74059	-0.30616	1	0.9982	-3.2561	0	0.18889	-1.8198	2
Ruvbl2	0.025744	2.8443	1	0.02255	2.6013	1	0.55128	-4.4593	0	0.02018	-0.44124	1
Osta	0.025759	1.3204	3	0.29158	0.2442	3	0.10414	-0.23942	2	0.95067	-1.2016	0
Hdac8	0.025784	0.67492	5	0.69274	-0.36912	2	0.05462	0.93667	4	0.21067	-0.68372	3
Aqp12	0.02581	1.0665	5	0.87288	-0.7139	1	0.20325	-1.2807	3	0.26256	-0.13578	3
Cd101	0.02585	1.6983	3	0.93325	-1.6396	0	0.83504	-2.7238	0	0.21062	-1.049	2
Cdca5	0.025859	2.6779	1	0.079296	1.7963	1	0.80897	-6.848	0	0.047723	1.6975	3
Pdha1	0.025919	-0.10595	3	0.015357	1.3365	4	0.64833	-8.4199	1	0.79679	-0.53169	1
Pde6c	0.025954	1.6009	3	0.17916	0.22792	3	0.18227	-4.9972	2	0.57329	-2.0232	1
Tusc2	0.025972	0.78112	3	0.9362	-7.2405	0	0.82303	-5.839	0	0.27127	-0.0038122	2
2210010C04Rik	0.026121	0.63369	2	0.31717	-0.92156	1	0.91323	-7.6436	0	0.46494	-1.3041	1
Vmn2r24	0.026123	0.20887	3	0.12759	-2.6831	2	0.29541	-7.0374	1	0.94779	-4.447	0
Srpr	0.026208	2.0708	2	0.70338	-1.9669	0	0.17328	-1.1162	2	0.17107	-0.93564	2
Ccbe1	0.026229	0.8842	4	0.70743	-4.9881	1	0.073511	-3.4109	1	0.5295	-1.5742	2
Cdk7	0.026292	0.67882	4	0.28476	-6.0948	2	0.35705	-7.4445	2	0.49363	-7.4159	1
Slc36a3	0.026318	-0.0485	2	0.20354	-0.3909	2	0.58078	-7.7643	1	0.00087116	-0.93961	2
Vmn1r14	0.026335	2.2102	2	0.80212	-1.1222	0	0.64896	-1.6744	0	0.57669	-0.80268	1
Eml3	0.026479	0.95516	5	0.92427	-1.7903	0	0.78826	-4.9732	1	0.39852	-1.7762	2
Rpgr	0.026546	-2.5402	1	0.76023	-3.0431	1	0.52287	-4.767	2	0.87742	-2.0656	0
Proz	0.026597	-3.0122	2	0.76742	-1.1033	1	0.71636	-2.9581	0	0.06672	-2.5281	2
Vegfb	0.026632	-7.0183	2	0.21802	-2.2404	2	0.62924	-2.4591	1	0.35893	-1.9976	2
Cybb	0.026638	0.40722	3	0.50712	-0.4638	2	0.60848	-8.28	1	0.11872	-0.33684	2
Rag1	0.026707	0.677	3	0.46488	0.076508	3	0.79969	-2.8041	1	0.27788	-0.49783	2
Cltc	0.026722	0.018121	1	0.62867	-0.75855	2	0.23004	-3.1559	2	0.35791	-2.7985	1
Alg6	0.026766	0.64347	3	0.99246	-3.6806	0	0.45037	-5.6006	1	0.27595	-4.7167	2
I830012O16Rik	0.026839	1.2402	3	0.019448	0.74249	4	0.7677	-1.4091	0	0.71923	-1.0276	1
Taar5	0.026848	1.2754	3	0.13445	-0.26823	2	0.81732	-6.6785	0	0.78682	-4.9637	0
2700060E02Rik	0.026882	0.49799	2	0.67098	-1.4045	1	0.22665	0.42307	2	0.70439	-0.22854	1
Ccdc42	0.02689	0.61333	5	0.9485	-4.3274	0	0.1133	-4.2939	2	0.7706	-0.6085	1
B020031M17Rik	0.026906	1.3289	4	0.41598	-1.1022	2	0.84052	-1.3884	0	0.77936	-5.6941	1
Tnnt2	0.026989	2.6779	1	0.40087	-0.55447	0	0.26948	-1.4617	1	0.77531	-5.8325	0
Kin	0.027001	2.6943	1	0.53568	-2.0332	0	0.021001	3.0765	1	0.653	-7.3661	0
Zc3h4	0.027036	1.6755	2	0.56246	-6.9128	1	0.89166	-7.1512	0	0.12674	-2.1693	2
Spag5	0.027149	-1.48	1	0.55033	-2.9028	1	0.45358	-0.51938	2	0.8974	-4.2607	0
2900011O08Rik	0.027264	1.2026	4	0.80609	-2.8669	1	0.32426	-8.0478	1	0.81645	-1.2555	0
Asgr2	0.027268	-0.099695	3	0.073142	0.58995	3	0.99218	-7.9776	0	0.73721	-2.2905	1
Dcun1d4	0.027377	1.316	3	0.7286	-2.3284	1	0.81629	-7.2511	0	0.87271	-2.9388	0
Qrsl1	0.027417	1.3144	3	0.1801	-1.8741	2	0.94065	-7.7735	0	0.21472	0.071663	2
Tle1	0.027472	1.0583	4	0.86882	-1.9855	1	0.5543	-0.38429	2	0.087694	-1.525	2
Ambp	0.02758	-0.52865	2	0.074795	-1.4122	1	0.46608	-4.9808	1	0.76356	-4.2713	1
Fam109a	0.027635	-1.498	1	0.63033	-3.0576	1	0.27835	-0.32012	1	0.46487	-2.0523	1
Wdhd1	0.027672	-0.047442	2	0.27814	-1.9434	1	0.89288	-7.2852	0	0.205	-4.1317	1
2810432D09Rik	0.027747	2.7154	1	0.68492	-5.5593	0	0.2645	-0.14322	0	0.04731	2.3696	1
Gm5635	0.027774	-0.87389	3	0.62441	-0.91721	1	0.097693	-4.4824	2	0.67198	-1.5844	1
Rac1	0.027821	-1.8056	1	0.036462	1.1028	3	0.08149	0.028325	1	0.29373	-2.4613	1
Tmprss11bnl	0.027849	-0.090893	3	0.28921	-0.34684	2	0.57878	-4.3961	2	0.079888	0.5532	4
Dad1	0.027968	2.7033	1	0.22789	0.77529	1	0.48285	-7.3296	0	0.42203	-1.1819	0
CTRLMM_67277	0.028068	2.2194	1	0.80296	-2.1541	0	0.91766	-8.5728	0	0.95861	-5.9849	0
Il27ra	0.028103	1.0417	3	0.90929	-1.1443	0	0.98943	-7.6997	0	0.30786	-2.0294	2
Utf1	0.028103	-1.7931	1	0.27053	-2.0535	1	0.2375	0.15839	2	0.60781	-3.6248	1
Rhox3g	0.028143	-2.2591	1	0.96379	-4.3272	0	0.5616	-4.7061	1	0.77244	-0.40849	1
Slc31a2	0.028184	1.48	3	0.10307	0.62018	3	0.47993	-5.2699	2	0.51782	-0.62973	1
Alg14	0.028246	1.4069	3	0.88796	-1.0136	0	0.19284	0.13434	2	0.85768	-5.4787	0
H1fx	0.028293	-0.46025	1	0.67578	-2.4072	1	0.64071	-4.7813	1	0.50292	-0.9301	2
AI836003	0.028323	0.52137	5	0.59891	-1.1705	2	0.043885	-1.1842	2	0.65721	-2.1897	2
Slc12a9	0.028381	-1.0987	3	0.68217	-2.6858	1	0.80773	-7.4296	1	0.66415	-4.1171	1
Wtap	0.028391	1.1075	4	0.3183	-0.3041	2	0.19837	-0.24857	2	0.3973	-0.14474	2
Gm9705	0.028416	-0.52277	2	0.42673	-2.3398	2	0.11824	0.28487	3	0.24977	-1.5197	2
Tas2r115	0.02843	0.29273	4	0.86799	-1.8673	1	0.23897	-1.5995	3	0.22885	-1.8113	2
Ostc	0.028438	1.7691	2	0.2666	0.17876	2	0.094372	1.2877	2	0.82963	-2.09	0
Slu7	0.028499	1.8105	2	0.074975	-2.1113	1	0.66894	-6.0795	0	0.53482	-2.4669	0
Aldh16a1	0.028503	-1.6494	2	0.4127	-1.0105	3	0.98221	-7.4248	0	0.84732	-4.7809	1
Irf2bp1	0.028606	1.6364	3	0.57632	0.10724	2	0.52465	-4.807	1	0.24254	0.25256	3
Ihh	0.028658	1.3356	4	0.70762	-4.3931	1	0.082053	-1.4519	2	0.34921	-2.115	2
Dppa2	0.028661	1.156	4	0.91574	-1.5069	0	0.78366	-2.9706	1	0.67617	-4.5454	1
Tnfrsf11a	0.028688	0.52085	5	0.34001	0.20925	3	0.71411	-4.3059	1	0.37616	-0.31153	2
Ctla4	0.028799	0.83256	4	0.45886	-0.080722	2	0.25867	-0.42098	3	0.17182	0.17127	3
Tdeanc2	0.028869	0.81094	4	0.30183	0.21365	3	0.31774	-7.3861	2	0.51842	-0.89373	1
Mpv17	0.028916	1.1671	3	0.66936	-0.51164	1	0.91525	-7.4578	0	0.1708	-4.7434	1
Ccl3	0.029035	1.1991	3	0.25851	-1.1015	1	0.018913	-4.449	1	0.87524	-1.7045	0
Vmn1r195	0.029059	1.3504	3	0.92213	-1.4372	0	0.72467	-6.9017	0	0.03843	-1.3582	2
Ugt2b1	0.029175	1.3322	3	0.55432	-1.8145	1	0.70935	-6.5786	1	0.73167	-0.40121	1
Edc4	0.029226	1.4533	3	0.62399	-0.73354	2	0.35238	-1.2247	2	0.0047631	-2.7113	2
Glis1	0.029244	-1.7239	1	0.5946	-0.24528	2	0.74551	-4.6444	1	0.87221	-0.55722	0
Rapgef1	0.029276	0.12208	2	0.23763	-0.98103	2	0.43255	-1.9143	1	0.78908	-3.5352	0
Cry1	0.029342	0.9238	4	0.41369	-1.1463	2	0.83801	-7.2939	0	0.71045	-2.5133	1
Uba2	0.029408	1.619	2	0.8399	-3.7328	0	0.26757	-0.90478	1	0.14403	0.85197	2
Sprr2d	0.029597	1.3871	3	0.43886	-2.2524	1	0.16957	0.28317	3	0.034507	1.5723	3
Rln3	0.02966	0.88025	4	0.34224	-0.40646	2	0.63784	-3.4805	1	0.87295	-1.136	0
Zfp185	0.029671	0.71732	2	0.31191	-1.4144	1	0.28608	-7.6828	1	0.64094	-1.7037	1
H2-Ab1	0.029707	-2.78	2	0.057214	0.47095	3	0.8784	-6.0156	0	0.76404	-4.0734	1
Nrde2	0.029758	0.42956	4	0.88556	-3.0148	1	0.84597	-5.5389	0	0.38187	-3.79	2
Sp2	0.029799	-1.4178	2	0.67264	-3.2575	1	0.29867	-1.974	2	0.19698	0.34027	3
Gm906	0.029815	1.7063	2	0.36949	-1.6077	1	0.1589	1.0464	1	0.52446	-0.36115	0
Prpf6	0.029979	2.7752	1	0.62204	-6.7208	0	0.26479	-0.56352	1	0.04951	-1.9068	1
AI429214	0.030014	-1.8975	2	0.14442	0.18653	3	0.0028593	-0.64134	3	0.9135	-1.3004	0
Zfp518b	0.030103	-1.1914	2	0.11861	0.84172	3	0.1928	-4.0119	2	0.89143	-5.0582	0
Klrk1	0.030116	1.1627	4	0.15568	0.47307	3	0.72303	-4.0273	1	0.60652	-0.80631	2
Cav1	0.030198	-2.1641	1	0.92281	-1.8947	0	0.71752	-7.8984	0	0.33868	0.26616	2
Mcart1	0.030225	1.0262	4	0.88659	-2.4963	0	0.55814	-3.1277	1	0.033224	0.83423	4
Cd163l1	0.030228	1.3341	3	0.29741	0.23498	3	0.4676	-5.5821	1	0.087963	0.90532	3
Gga3	0.030279	-0.87768	3	0.54565	-0.71564	2	0.1174	-4.9039	2	0.44391	-2.2808	1
Adsl	0.030334	-0.97281	1	0.00089732	2.7211	2	0.40188	-6.9227	1	0.59575	-5.3959	1
Avpr2	0.030389	1.8311	2	0.052279	1.3494	3	0.37615	-0.34472	1	0.025653	1.5593	3
Sulf1	0.030486	0.90386	4	0.49577	-1.8483	1	0.10469	-8.4091	1	0.51193	-1.3501	2
4933403O08Rik	0.030622	-0.65191	2	0.79184	-2.233	1	0.062231	-0.10132	2	0.585	-1.0945	1
Daxx	0.030628	0.73417	4	0.065669	1.0233	4	0.13721	-5.3337	2	0.11988	-1.5141	2
Skida1	0.030634	0.61191	4	0.29213	-2.7836	1	0.042386	1.7215	3	0.28808	-0.86496	2
BC048355	0.030706	1.2837	4	0.82602	-2.9052	1	0.51957	-7.4971	1	0.69124	-7.1124	1
Zfyve1	0.030801	-0.07811	3	0.92112	-1.4015	0	0.79689	-5.5258	1	0.44979	-2.5658	2
P2rx3	0.030931	1.2322	4	0.22258	-0.081975	2	0.85701	-6.125	0	0.68902	-2.0759	1
Pnpla2	0.030975	-1.2224	2	0.77752	-2.1532	1	0.53972	-3.3814	1	0.54277	-0.37616	1
Hpcal1	0.031044	2.0644	3	0.35736	-0.77955	1	0.39685	-3.3544	1	0.011944	0.91642	3
Spns2	0.031088	1.0337	4	0.52876	-1.0889	2	0.46144	-1.6895	2	0.29438	-2.8532	1
4932429P05Rik	0.031135	1.2059	3	0.13633	-4.8142	1	0.44229	-4.5656	2	0.81726	-1.4545	0
S100b	0.031151	-0.85539	2	0.86872	-1.2735	0	0.34048	-2.0688	2	0.42492	-1.156	2
CTRLHS_57395	0.031216	2.0693	1	0.96478	-3.2852	0	0.961	-8.8302	0	0.42109	-0.59884	0
Erf	0.031245	1.508	3	0.82413	-2.248	1	0.5427	-7.8347	1	0.1647	0.59165	3
Crnn	0.031409	1.5099	3	0.19457	0.2218	3	0.11223	1.0022	3	0.83992	-1.1462	0
Cwf19l2	0.031415	0.69442	4	0.2122	0.33474	3	0.50108	-2.4559	2	0.73365	-1.3126	1
Ccdc64b	0.031443	1.7781	2	0.68526	-1.2206	0	0.42594	-6.9511	1	0.92191	-4.4127	0
Shf	0.031489	0.00020767	2	0.8239	-3.3764	1	0.73447	-7.5218	1	0.4101	-1.7686	2
Perp	0.03152	0.76201	4	0.33987	-0.32441	2	0.79683	-8.1178	1	0.96075	-2.4115	0
Cd86	0.031587	0.84248	4	0.81974	-0.7088	1	0.22818	-1.0865	2	0.32949	-1.7121	2
6330439K17Rik	0.031597	0.96689	4	0.89118	-1.6776	1	0.033115	1.4939	4	0.24783	-4.7007	1
Vmn1r67	0.031602	0.91174	4	0.52503	0.073076	2	0.90557	-6.2979	0	0.37538	-2.1072	3
Fbxo33	0.03177	-2.5405	1	0.83521	-1.6599	1	0.28974	-3.6485	2	0.9761	-3.293	0
Entpd2	0.031793	0.57459	4	0.42467	-2.4896	1	0.93588	-7.9493	0	0.81181	-3.0494	0
Svs4	0.031798	-1.437	1	0.85055	-2.1347	0	0.79383	-7.4615	0	0.099116	1.3531	2
Spc24	0.031818	1.5385	2	0.1248	-2.5434	1	0.82614	-6.3194	0	0.84298	-6.4978	0
Bmp8a	0.031822	0.39876	2	0.068541	0.93584	3	0.77581	-3.3197	0	0.11055	-0.040056	2
Mcm4	0.03185	1.5049	3	0.11381	1.1559	3	0.2353	-0.78993	2	0.98843	-7.118	0
Ak1	0.031884	-0.22688	2	0.57012	-0.77356	1	0.21297	-1.0672	2	0.13293	0.45617	3
Slc18a3	0.031948	-0.89482	3	0.77251	-0.80248	1	0.58253	-1.1606	1	0.79533	-2.9045	1
Cidec	0.031966	0.27711	3	0.23876	-3.3081	2	0.96504	-7.6241	0	0.33942	-0.40745	3
Ranbp2	0.032013	2.4585	1	0.80744	-7.4228	0	0.4896	-4.2298	0	0.31877	-1.6215	1
Ugt1a1	0.032014	1.1873	2	0.94292	-4.9842	0	0.038102	1.4851	4	0.046135	-2.0643	2
Gm5465	0.032024	1.1216	3	0.19924	0.76568	2	0.2246	-3.1671	2	0.51406	-2.2572	1
Abcc10	0.032107	1.0676	4	0.99574	-2.8817	0	0.12297	0.09238	2	0.058131	0.80443	4
Hs3st2	0.032121	-0.70587	2	0.82344	-1.2457	1	0.48879	-4.533	2	0.86055	-1.1211	0
H2-M2	0.032142	1.4095	4	0.63517	-1.4363	2	0.85343	-7.572	0	0.40455	-0.32827	2
Kndc1	0.032187	0.8908	3	0.29094	-0.20367	2	0.19678	-0.44281	3	0.080469	-0.4654	2
Lpxn	0.032302	-0.26393	1	0.22899	-2.419	1	0.2623	-5.0573	1	0.2984	-1.1204	1
Rufy3	0.032318	-1.7377	2	0.086385	0.45056	3	0.53853	-1.1978	2	0.0010556	1.0606	6
Kcnn1	0.032368	1.4516	3	0.28242	-2.042	1	0.15579	-5.5706	1	0.95207	-4.39	0
Iqcf6	0.032389	-1.8021	2	0.8402	-2.4673	0	0.95087	-7.7569	0	0.37121	-2.2562	2
Ccne2	0.032412	0.90612	4	0.054191	-0.24492	3	0.57428	-5.8141	2	0.89391	-3.5501	0
Rab19	0.032464	0.94321	3	0.59037	-0.47948	1	0.75363	-7.9097	0	0.22462	-2.9977	1
Actrt1	0.03251	0.5201	3	0.51399	-1.3647	2	0.35104	-6.553	2	0.59335	-1.184	2
Serpinb8	0.032575	1.1092	3	0.94741	-2.3851	0	0.303	-3.9957	1	0.40333	-3.0904	1
Denr	0.03262	1.6623	3	0.012645	-2.4464	2	0.59333	-0.22003	2	0.89086	-1.4639	0
Tmem106b	0.03268	0.82094	3	0.14149	0.54384	3	0.6115	-5.3587	1	0.13431	-0.12592	2
Akt1	0.032691	0.69919	4	0.95131	-0.39054	0	0.58129	-2.6867	1	0.65243	-0.964	1
Lass6	0.032818	0.7601	4	0.84646	-0.20942	1	0.56772	-1.7245	2	0.26349	0.084222	3
Trmt10b	0.032854	0.99527	4	0.08876	-2.2349	2	0.17024	-7.4428	2	0.3547	-2.1573	2
Nktr	0.032891	1.2973	4	0.27212	0.36767	3	0.67699	-3.0184	1	0.6335	-0.78271	2
Slc2a2	0.032901	0.78416	4	0.48311	0.027918	2	0.63143	-6.221	1	0.56277	-0.87202	2
Smcr7l	0.032989	0.65035	4	0.8732	-1.0091	0	0.5303	-7.1092	1	0.94986	-3.0695	0
Ccdc74a	0.032997	-1.1282	3	0.69721	-0.97065	2	0.92782	-6.0183	0	0.10139	-2.2985	2
Chchd6	0.033024	-1.8797	1	0.61863	-2.9761	1	0.80807	-4.5628	0	0.16364	0.53078	3
Ttll9	0.033055	0.31895	3	0.89056	-1.5396	0	0.94927	-7.4357	0	0.83815	-3.3072	1
C1qtnf9	0.033093	-0.89279	3	0.20663	0.49713	3	0.84142	-6.8452	0	0.60312	-1.8598	1
Arpp19	0.033109	1.4502	3	0.61652	-2.9131	1	0.75744	-8.3006	0	0.2851	-3.398	1
4732456N10Rik	0.033154	1.593	3	0.13505	0.72135	3	0.78463	-5.1629	0	0.24576	0.25279	3
4930451G09Rik	0.033174	1.3457	3	0.26155	-0.72376	2	0.55879	-0.35692	1	0.58754	-2.0191	1
Ptpru	0.033275	0.81571	4	0.69202	-0.17434	2	0.64822	-1.8626	1	0.25176	-0.8784	2
Tmem213	0.03347	1.0524	4	0.74145	-5.2142	1	0.53158	-3.2079	1	0.54043	-2.3126	2
Popdc3	0.03348	-1.2818	3	0.03629	0.59783	5	0.57845	-4.2876	2	0.76355	-2.7451	1
Il2ra	0.0335	0.50958	3	0.079852	0.073187	3	0.09379	-0.21744	3	0.2941	0.060843	3
Dfnb59	0.033501	0.94197	4	0.19429	-1.1951	2	0.73732	-2.3481	1	0.55744	-2.0587	1
Sla2	0.03353	0.17302	3	0.87637	-6.6828	0	0.61044	-7.1307	1	0.23398	-1.2165	1
Lrrc26	0.033608	-1.4901	2	0.82434	-2.7093	1	0.56771	-7.2889	1	0.26774	-0.74042	2
Ccl19	0.033656	1.2073	4	0.67601	-1.6393	1	0.036498	1.436	3	0.070138	0.87468	3
Slc25a35	0.033754	-5.0254	1	0.86092	-2.2155	0	0.56292	-7.3859	1	0.58139	-2.5343	1
CTRLMM_66429	0.033754	2.3465	1	0.82453	-4.6911	0	0.70146	-7.9669	0	0.73436	-3.2676	0
Gata1	0.033759	0.51456	3	0.26545	-0.69932	2	0.41439	-3.7382	2	0.1014	0.77322	4
Jak1	0.033798	1.0517	4	0.64661	-1.4963	1	0.29457	0.10489	3	0.053372	-0.68209	2
Chmp5	0.033896	1.2308	3	0.25784	0.31467	3	0.44711	-2.7538	1	0.13509	-2.8404	1
Unc13d	0.033958	1.5795	3	0.4318	-0.96522	2	0.68175	-7.3394	0	0.61682	-0.68435	1
Klhl28	0.033969	-0.094801	2	0.93846	-3.3242	0	0.95078	-5.2578	0	0.36022	-1.9437	1
Sptlc2	0.034005	1.037	4	0.11782	-0.95369	2	0.064529	-5.1691	1	0.38107	-0.29324	3
Rptor	0.034012	-3.1271	1	0.17488	0.41764	4	0.99801	-7.8686	0	0.2134	-1.0594	2
Mrpl50	0.034038	-2.3413	2	0.30283	-3.2356	1	0.82219	-3.5316	0	0.40321	-4.9811	1
Tmprss11f	0.034122	1.1949	3	0.43487	-1.8289	1	0.94545	-8.0878	0	0.34066	0.16883	2
Spata18	0.034157	-4.0723	2	0.44664	-3.2947	2	0.87905	-7.2356	0	0.79953	-0.42722	1
Rrh	0.034182	0.80505	4	0.87823	-0.78908	1	0.10106	-0.42504	3	0.4585	-2.9009	2
Stx18	0.034205	1.529	2	0.020158	1.6952	2	0.75415	-6.8007	0	0.88806	-7.3193	0
Naprt1	0.034245	1.3134	3	0.48056	-0.8089	2	0.60387	-4.3592	1	0.58098	-6.8891	1
1700008P02Rik	0.034296	1.1611	4	0.67659	-2.7854	2	0.81092	-7.4321	1	0.82943	-3.9071	1
Ptrh1	0.034344	1.4489	3	0.89297	-1.5573	0	0.81968	-6.7834	0	0.66946	-3.9955	1
Peli3	0.034494	0.62403	2	0.60292	-2.3694	1	0.8844	-7.3826	0	0.86567	-2.8465	0
CTRLHS_57517	0.034519	2.2232	1	0.66745	-1.9116	0	0.81912	-8.2562	0	0.8691	-4.2566	0
Sf3b1	0.034561	1.3268	1	0.85066	-4.3564	0	0.62181	-5.9889	0	0.77759	-4.5264	0
Mta2	0.034611	1.4488	4	0.053086	1.2708	4	0.94772	-4.4688	0	0.051494	0.087107	2
Aspn	0.034616	-0.36932	2	0.19609	0.44952	3	0.052575	-0.2466	3	0.46827	-1.6408	2
Gle1	0.034723	1.4574	2	0.0070844	1.943	2	0.11782	1.0995	2	0.90228	-5.5227	0
Rab7	0.034737	0.24184	3	0.35137	-0.37318	3	0.73245	-5.5798	1	0.68363	-1.2694	1
Ppp3cb	0.034774	-0.52534	3	0.61244	-0.43913	2	0.53379	-1.8102	1	0.85762	-1.7993	1
Trim61	0.034803	0.99838	4	0.10911	0.68352	4	0.4359	-2.4441	2	0.16863	0.34807	3
Fam63a	0.034881	1.1088	4	0.94162	-5.3551	0	0.53442	-1.8384	2	0.24597	-1.1973	2
Snx14	0.034986	0.6961	4	0.29874	-1.9476	2	0.00018722	-3.1458	2	0.56195	-0.78269	2
Dennd2c	0.035001	-2.0328	2	0.89422	-0.51885	0	0.69337	-5.2949	1	0.53824	-3.5295	1
Ankrd34c	0.035079	-1.1472	3	0.75659	-1.6736	1	0.95804	-6.359	0	0.14194	0.24235	4
Rfxap	0.035111	2.3359	1	0.78511	-3.9593	0	0.10483	1.4768	2	0.030054	-1.9497	1
Dusp4	0.035157	0.40331	4	0.55943	-0.312	2	0.55678	-2.4097	1	0.1495	0.42489	3
Snrnp27	0.035162	1.4492	3	0.41773	-3.316	1	0.61037	-0.62229	0	0.41965	-0.804	1
Agbl4	0.035277	1.5234	3	0.47515	-0.62628	2	0.38631	-1.7845	1	0.1585	0.54693	3
Rgmb	0.035296	-3.7619	2	0.50185	-1.0893	2	0.9292	-3.9519	0	0.47812	-6.3025	2
Snip1	0.035324	1.7211	2	0.29033	-3.1994	1	0.31298	-2.7396	1	0.8848	-7.1191	0
Cdh3	0.035331	-1.7873	1	0.88271	-1.3231	0	0.041628	0.43478	2	0.93598	-5.8598	0
Nek2	0.035364	0.83702	4	0.26838	0.0069236	3	0.78033	-1.516	1	0.59595	-0.64364	2
Trp53bp1	0.035416	0.3812	2	0.12684	-1.6785	1	0.28725	-3.954	1	0.24875	-2.8283	1
Zfp575	0.03548	-1.2636	2	0.5993	-2.2894	2	0.60527	-5.9694	1	0.69799	-2.7727	1
Prg3	0.035534	-1.9067	1	0.71469	-1.584	1	0.0032595	0.11964	2	0.3579	-2.2487	2
Prss37	0.035564	-3.3428	2	0.87761	-2.1593	0	0.55885	-4.0508	1	0.66785	-0.73268	1
Tlr12	0.035572	-0.3543	2	0.2182	-1.0025	2	0.10179	-3.0347	2	0.16771	-1.5244	1
Ggnbp2	0.035668	1.0122	4	0.62859	-4.2314	1	0.44183	-6.0592	1	0.3738	-6.3837	1
Evpl	0.035691	0.44092	4	0.50034	-0.65261	2	0.93577	-7.7075	0	0.71014	-3.5724	1
Fam96a	0.03573	-0.58665	2	0.99056	-2.4291	0	0.94259	-7.9624	0	0.86876	-1.2365	0
D10Bwg1379e	0.035734	-2.2902	1	0.54669	-2.116	1	0.41583	-6.8401	2	0.5574	-3.2596	2
Ubash3a	0.03582	-1.1842	2	0.57216	-2.7007	1	0.61481	-2.3226	1	0.66098	-0.63586	1
Stoml1	0.035821	1.1324	2	0.37267	0.19088	2	0.14192	-4.0617	2	0.76521	-0.97047	1
Heatr3	0.035829	-2.8896	1	0.25501	0.50797	2	0.43144	-4.641	2	0.47808	-4.3447	2
CTRLMM_66721	0.035836	2.5727	1	0.48477	-1.4917	0	0.21653	0.69617	1	0.62258	-7.2499	0
Gm7361	0.035875	-1.2636	1	0.078633	0.89867	1	0.77306	-6.966	0	0.26719	-6.9375	1
Atf7	0.035897	0.75039	4	0.80122	-5.1478	1	0.56522	-3.8349	1	0.70808	-3.8398	1
Thrsp	0.035997	1.148	4	0.52859	-5.7767	2	0.53505	-6.4969	1	0.89191	-1.7302	0
Tm4sf19	0.036023	-0.81605	2	0.69944	-0.60787	1	0.033093	-1.7319	2	0.33089	0.18518	2
Dmp1	0.036119	-0.7274	2	0.46754	-2.1897	1	0.34183	-7.6378	1	0.14776	-0.49086	2
Zbtb41	0.036142	0.46236	3	0.39007	-0.37413	3	0.41263	-2.5184	2	0.37635	0.086652	2
CTRLMM_66984	0.036234	2.3355	1	0.82102	-5.4214	0	0.66225	-7.8733	0	0.76702	-4.4134	0
Atp6v0d1	0.036286	2.6315	1	0.63481	-6.7757	0	0.58585	-6.8977	0	0.70927	-3.0197	0
Gpnmb	0.036332	1.109	3	0.21616	-0.49406	2	0.89836	-7.9968	0	0.46175	-3.7859	1
Sep.14	0.036351	0.91663	4	0.31824	-0.54263	2	0.39286	-5.9691	2	0.89168	-1.3275	0
Wbp4	0.03638	-0.74142	2	0.61424	-3.1925	1	0.90845	-1.9827	0	0.68128	-2.6498	1
Sep.12	0.036408	0.72754	3	0.25418	0.031386	3	0.45697	-7.6157	1	0.72802	-7.5872	1
Gnb1	0.036441	-0.91591	2	0.22711	-3.2742	2	0.021353	-3.0776	1	0.86983	-4.0663	0
Fmo3	0.036453	-2.0753	2	0.87208	-1.4513	1	0.35918	-7.5721	2	0.30734	-0.85909	3
Vmn2r56	0.03646	0.97488	3	0.10547	1.0251	3	0.34021	-7.7433	1	0.18241	-5.1555	1
Stat2	0.036565	1.1196	4	0.2874	-2.6965	1	0.72703	-7.5725	1	0.52918	-3.1854	2
Hipk3	0.036672	0.53186	4	0.769	-1.8906	1	0.33623	-2.6333	2	0.041606	0.63295	4
9130019O22Rik	0.036843	-0.69985	2	0.27706	-0.57263	2	0.22251	-4.6879	2	0.14325	0.75855	3
Cyp2c44	0.036844	-1.1655	2	0.5954	-1.6159	1	0.17241	-1.8937	3	0.59618	-2.3761	2
Uxs1	0.03695	0.96085	4	0.31638	-0.56243	2	0.90491	-4.5536	0	0.97615	-4.7695	0
Tspan17	0.036951	-1.3229	1	0.4782	-5.8348	1	0.35687	-7.3895	1	0.38337	-2.1825	1
Ppil4	0.036984	1.7952	2	0.31176	-2.7872	1	0.24273	0.25396	2	0.88109	-7.1483	0
Thrap3	0.036999	1.3176	3	0.27432	0.35087	3	0.81833	-7.3454	1	0.87183	-1.8005	0
Car4	0.037007	0.07929	3	0.74111	-0.80456	1	0.63767	-3.7922	1	0.27805	-0.1993	3
Tcof1	0.037008	2.1308	2	0.20753	-0.0094974	1	0.74862	-5.3335	0	0.46528	-2.38	1
Gfra2	0.03701	-0.53291	2	0.78197	-6.7076	1	0.35582	-1.8623	2	0.66303	-3.2372	2
Ttc33	0.037011	-0.12457	3	0.05478	-0.95123	3	0.46137	-4.6149	2	0.22667	-5.9214	1
Mycl1	0.037075	0.77202	4	0.69013	-3.3417	1	0.80119	-2.4234	1	0.47829	-1.7928	1
Slc22a5	0.037076	1.2107	3	0.099073	0.15086	2	0.28036	-3.5185	2	0.46746	-4.7581	1
Cd151	0.037162	1.2463	3	0.22959	-2.3688	1	0.086929	1.0843	3	0.56508	-5.8042	1
Ldb1	0.037241	1.3416	3	0.20179	-1.0126	2	0.89644	-5.4044	0	0.67447	-3.0545	1
Dtx3	0.037282	-1.4844	2	0.044831	-0.40779	2	0.067538	-3.4926	1	0.79756	-3.3444	1
Rimbp3	0.037334	0.60359	4	0.24772	-0.20403	2	0.53804	-5.426	1	0.49174	-1.8422	2
Col11a1	0.037375	-0.16893	2	0.61509	-0.82925	2	0.33697	-2.4574	1	0.4686	-3.5422	2
Gm595	0.037381	-2.6567	3	0.96156	-4.2217	0	0.73952	-6.3986	1	0.23342	-0.54394	2
Tollip	0.03739	0.91854	4	0.36665	-1.0052	2	0.73585	-5.5311	1	0.18476	-0.71525	2
Arhgap1	0.037425	0.8012	4	0.99385	-2.9396	0	0.54796	-5.1826	2	0.1947	-0.04423	3
Trabd	0.037445	-2.141	1	0.94559	-2.5452	0	0.7482	-7.8719	1	0.31854	-0.95516	2
Zbtb7c	0.037491	0.61197	3	0.64393	-2.1085	1	0.19063	-2.4671	1	0.93311	-5.1735	0
Epha7	0.037526	0.52771	4	0.5669	-0.88153	2	0.87159	-2.5137	0	0.1705	0.040193	3
Acad10	0.037537	-0.09574	3	0.60821	-0.5673	2	0.42236	-4.5354	2	0.55688	-1.1877	1
Zfp677	0.037557	-1.1914	1	0.62669	-2.9796	1	0.27273	-0.42387	2	0.29619	0.29951	2
Pcgf3	0.037618	-0.34652	2	0.19161	0.041007	3	0.20643	-0.13771	3	0.62008	-0.089933	2
Fbxl8	0.037636	1.0972	3	0.85342	-1.1771	0	0.071086	-2.0224	2	0.95066	-1.499	0
Sgip1	0.037638	1.2657	4	0.017136	0.10377	2	0.19758	0.22876	3	0.55468	-2.0328	1
Sec31a	0.037761	1.623	3	0.63474	-6.9357	1	0.1481	-2.4839	2	0.64863	-1.4854	1
Otud7b	0.037772	0.97518	4	0.52794	-0.28261	2	0.34681	-0.96046	2	0.53735	-0.85831	2
Psg17	0.037774	-1.4207	2	0.19429	-0.077155	1	0.59422	-7.7323	1	0.29832	-2.776	1
Tmed10	0.037819	1.4024	4	0.31736	-0.5075	3	0.66255	-7.3068	1	0.27259	-0.2692	2
Usp51	0.037932	-2.1763	2	0.72178	-2.339	1	0.19463	-0.51732	2	0.0060025	1.5918	4
Dmxl2	0.037951	0.80161	4	0.7616	-2.0971	1	0.69748	-5.0878	1	0.67748	-1.1208	1
Sec22b	0.037972	0.35318	2	0.63571	-0.49025	1	0.88804	-6.6721	0	0.81006	-0.78068	0
Dgka	0.037975	-0.097264	3	0.37149	-0.089232	3	0.20729	-0.20703	3	0.40751	-0.73467	2
C87499	0.038062	1.5973	3	0.25275	-0.37486	1	0.55714	-8.1528	1	0.58856	-1.0882	1
Sbds	0.03808	2.149	2	0.42951	0.13498	1	0.68094	-4.5339	0	0.22527	-2.8937	2
Bex1	0.038217	1.2178	3	0.045459	-3.1125	1	0.64942	-5.1825	1	0.40935	-0.56249	2
Ttc27	0.03825	0.78698	1	0.88978	-6.9401	0	0.045977	2.028	3	0.93975	-6.9564	0
Cdkn2a	0.038262	1.3674	2	0.41125	-2.8809	1	0.63462	-2.2235	1	0.82893	-2.2235	0
Fam171b	0.038316	-3.8741	1	0.87943	-2.9288	0	0.073386	-2.9736	2	0.85075	-5.2516	0
Eif3e	0.038403	2.5173	1	0.48511	-1.4692	0	0.47767	-5.0294	0	0.63028	-7.2802	0
Cdk12	0.038408	-3.315	1	0.2176	0.086763	2	0.61803	-7.6315	1	0.84798	-3.8837	0
Fam227b	0.03844	1.5771	3	0.41471	-0.64141	2	0.96107	-7.5946	0	0.095962	0.93608	2
Rbm42	0.038447	1.9852	2	0.86466	-3.0152	0	0.1787	-1.4954	1	0.23099	0.4082	2
Hist3h2a	0.038456	-4.8177	1	0.18115	-2.9124	2	0.34268	-7.1247	1	0.17582	-0.66005	2
Sh3gl1	0.038472	1.5198	3	0.57284	-3.1892	1	0.46386	-5.2964	2	0.25467	-0.24288	2
Cfi	0.038778	0.93016	4	0.63023	-3.0893	1	0.86077	-3.4925	0	0.75383	-3.5598	1
Aldh4a1	0.038802	1.4818	3	0.51133	-2.0585	1	0.69782	-7.4721	1	0.14889	-1.8655	1
Fam50b	0.038861	1.3678	3	0.1938	-0.36065	2	0.43075	-7.6648	2	0.14934	0.59631	3
Tmem179	0.038931	-0.35543	2	0.22538	-2.6642	1	0.066912	-4.5684	1	0.5446	-2.9932	1
Tdrd7	0.039042	0.7708	4	0.12384	0.36948	3	0.0028724	1.6689	4	0.27287	0.11899	3
CTRLMM_67346	0.03908	1.9931	1	0.8881	-2.4578	0	0.89568	-3.8833	0	0.16724	0.80195	1
Cd63	0.039115	-1.7562	2	0.16254	0.06832	2	0.41629	-1.6381	2	0.71353	-3.1546	1
Gdap1	0.039133	-1.9012	1	0.91073	-1.7641	0	0.99539	-7.865	0	0.43718	-1.203	1
Shb	0.039155	-1.3414	2	0.49923	-1.0631	1	0.072085	0.84154	2	0.60873	-4.1626	1
Nkapl	0.039206	1.2666	3	0.63799	-1.6022	1	0.32845	-1.4351	2	0.16672	0.12418	2
Vmn2r107	0.039249	1.4394	3	0.073579	0.64634	2	0.89376	-5.2382	0	0.72544	-2.159	1
CTRLHS_57629	0.039404	2.2153	1	0.86635	-5.1427	0	0.63012	-3.4721	0	0.80858	-4.0651	0
Lrrc27	0.039424	-2.6338	3	0.32523	-2.0006	1	0.90513	-7.7107	0	0.60575	-1.9463	2
Secisbp2	0.039529	1.2181	3	0.23558	-0.56021	3	0.65318	-4.4502	1	0.56886	-2.9378	1
Gpr158	0.039532	0.70544	3	0.99576	-2.9586	0	0.6901	-5.7814	1	0.2204	-2.0641	1
Wnt10b	0.039532	0.94019	4	0.34154	-0.71387	2	0.97615	-8.1796	0	0.69888	-5.0629	1
Kcnb2	0.039554	0.88496	4	0.41365	-2.1287	2	0.97878	-7.9934	0	0.79812	-2.2922	1
Wnt8a	0.03957	-1.4271	1	0.94066	-4.2981	0	0.86642	-7.6593	0	0.42418	-0.49378	2
Apoa2	0.039618	1.7153	3	0.75375	-0.36416	0	0.90259	-7.5316	0	0.33768	-3.9013	1
Zfp157	0.039688	-3.5345	2	0.95735	-1.8185	0	0.14923	0.62708	3	0.19784	0.26438	3
Ddx42	0.039697	1.5625	4	0.77597	-2.196	1	0.22998	-5.9289	2	0.88514	-3.118	0
Lcn4	0.039774	0.9074	3	0.87799	-1.5873	0	0.53066	-7.4269	1	0.11447	1.2064	2
Szt2	0.039816	1.6127	3	0.20389	0.64835	2	0.62005	-7.1404	1	0.73118	-3.035	0
Gtf2b	0.039862	2.5998	1	0.23962	0.74898	1	0.41704	-7.044	0	0.56686	-7.0155	0
Cd72	0.039951	0.91725	4	0.77274	-1.3771	1	0.6505	-2.3538	1	0.29598	-1.1945	1
Rxfp3	0.039999	1.1331	3	0.20214	-2.3394	1	0.72105	-7.5491	1	0.64694	-1.3388	1
Snx9	0.040001	0.69145	4	0.88504	-1.2311	1	0.14997	-0.42674	2	0.5561	-2.4163	2
Apod	0.04011	1.1427	3	0.82815	-0.79301	1	0.64271	-3.5571	1	0.2082	-1.4279	2
Ints8	0.040165	2.492	1	0.31311	0.15705	0	0.37866	-3.269	1	0.10227	-6.7465	1
Lef1	0.040173	1.5189	3	0.23211	0.45199	3	0.10568	0.022682	2	0.29835	-1.0132	2
Fuca1	0.040311	1.0944	4	0.32171	-0.048976	3	0.51869	-5.3535	2	0.19997	-2.3174	2
Rad51ap2	0.040395	0.40386	3	0.95428	-4.4947	0	0.36802	-3.7379	2	0.99353	-3.0082	0
Ramp1	0.04041	0.86074	4	0.31858	-1.3051	3	0.1661	-1.3452	2	0.77794	-1.4403	1
Zfpl1	0.040442	0.93513	4	0.4153	0.12608	3	0.30875	-0.68616	3	0.061932	0.33933	3
Tmprss3	0.040462	-3.4852	2	0.031285	-0.45741	2	0.82781	-5.8363	0	0.012715	1.5583	4
Mmp10	0.040517	0.5335	2	0.42803	-1.1247	1	0.99913	-8.3977	0	0.072722	0.69717	3
Ccdc170	0.040531	-2.24	1	0.37226	-1.2969	2	0.20625	-0.084943	3	0.045644	-4.2192	2
Bnip3l	0.040535	0.94483	4	0.26743	-1.7836	1	0.86575	-4.7681	0	0.28494	-1.6341	2
Mboat4	0.040535	0.84427	2	0.35569	-1.7496	1	0.25863	-2.9465	2	0.82322	-1.908	0
Srebf1	0.040587	-2.0552	2	0.48291	-0.98228	2	0.65701	-8.2734	1	0.66262	-1.2308	1
Mdm2	0.040614	2.5163	1	0.33201	0.015532	0	0.64579	-7.1045	0	0.13421	0.61605	2
Upf2	0.040729	-1.7333	2	0.95337	-4.1272	0	0.035605	-2.46	2	0.35563	-1.6655	2
Ccnk	0.040746	2.3398	1	0.21721	0.77445	1	0.58693	-7.1887	0	0.37244	-1.6892	1
Uck2	0.040774	0.34449	4	0.57081	0.057465	2	0.6662	-0.20455	1	0.53916	-1.1105	1
Slc2a10	0.040836	-1.7059	2	0.92806	-2.0455	0	0.69567	-2.2376	0	0.78716	-1.671	0
Nepn	0.040904	-2.778	3	0.16756	-0.38576	3	0.48004	-2.3444	2	0.16674	-6.2528	2
2010003K11Rik	0.040965	-0.72992	1	0.65564	-2.6088	1	0.18133	-7.7877	1	0.14927	-2.4983	2
Mrpl12	0.041287	2.5277	1	0.31005	0.18829	1	0.59968	-6.9668	0	0.7604	-4.7569	0
Meis3	0.041333	1.8465	2	0.73391	-1.2404	0	0.66672	-1.554	1	0.38921	-0.47647	1
Ebf4	0.041389	-0.52812	2	0.97697	-3.1693	0	0.10073	-4.8636	1	0.7323	-2.6925	0
Samd4	0.04144	-0.6959	2	0.47549	0.020524	2	0.18078	-5.585	1	0.92538	-1.7976	0
Arpc1a	0.041461	-0.049705	3	0.79049	-2.816	1	0.22199	-0.99731	2	0.33071	-2.5038	2
CTRLMM_66607	0.041509	2.4512	1	0.69689	-7.0236	0	0.48921	-7.3551	0	0.19982	0.82747	1
Cyp2g1	0.041609	-2.7997	1	0.056456	0.8806	3	0.704	-1.7307	0	0.2907	-1.3489	1
Spata32	0.041636	1.1032	3	0.87686	-1.6458	0	0.020786	0.62928	3	0.90522	-1.3845	0
Zfp580	0.041716	0.58766	2	0.78626	-2.556	0	0.68678	-4.2915	1	0.52516	-7.6069	1
Wfdc15a	0.04173	1.0577	3	0.66514	-2.0053	1	0.89115	-8.2327	0	0.62405	-4.3685	1
Ece1	0.041801	-0.67805	1	0.18737	0.59611	3	0.32311	-1.9196	2	0.27381	0.011248	3
Kif15	0.041886	0.4825	4	0.4334	-0.65015	2	0.65403	-2.4008	1	0.13555	0.26325	4
Il31	0.041974	-0.10943	2	0.22692	-2.5332	1	0.274	-2.8007	2	0.30448	-0.66507	2
Blmh	0.042062	0.92673	4	0.6504	-0.36264	2	0.0053869	0.019694	3	0.82211	-1.2629	1
Tll1	0.042104	0.91051	4	0.074352	-0.013356	3	0.16557	-4.7325	2	0.40965	-0.48392	1
Atp6v1b1	0.042127	0.076208	1	0.80365	-2.7315	0	0.43099	-6.9531	1	0.050732	1.5797	3
Ccdc106	0.042127	0.52837	3	0.37352	-1.6694	1	0.8743	-7.4849	0	0.15207	-2.7865	2
Glrx5	0.04214	-3.0768	1	0.42347	-0.09675	2	0.94814	-7.5334	0	0.53067	-0.16905	2
Eapp	0.042188	1.5595	3	0.98627	-6.0841	0	0.42918	-5.306	1	0.92398	-4.9384	0
Myo16	0.042372	-2.973	1	0.054102	-0.35413	2	0.80152	-5.2764	1	0.0049345	-0.033293	3
Tnfsf10	0.042377	-0.44151	3	0.00048778	0.72322	6	0.63922	-2.4059	1	0.2686	-0.41037	2
Zfp784	0.042396	0.66376	3	0.86942	-1.2372	1	0.73376	-5.5224	1	0.46027	-0.61247	2
Rpl28	0.042446	2.4854	1	0.38647	-0.45858	0	0.17066	1.1281	2	0.61088	-4.011	0
Rhox3f	0.042483	1.7919	2	0.25845	0.59187	2	0.018386	-6.3839	1	0.95688	-6.9958	0
Slc5a4a	0.042506	1.4117	4	0.66037	-1.3401	1	0.0018357	-0.62369	2	0.41497	-0.35666	1
CTRLHS_57036	0.042719	1.9762	1	0.6059	-1.3442	0	0.1799	0.88699	1	0.36995	-0.3857	0
Slc32a1	0.042871	-0.94979	2	0.34021	-0.80562	2	0.80751	-5.5084	1	0.21718	-0.57831	3
Dnttip1	0.042903	0.12573	2	0.58364	-3.1518	2	0.46638	-7.838	1	0.19034	-1.6712	2
Scgb2b26	0.042926	0.42772	4	0.54572	-0.48876	2	0.61036	-6.0209	1	0.52429	0.047255	2
Cdon	0.042935	-4.0627	1	0.32702	-0.21966	3	0.59577	-0.84468	2	0.205	-0.64438	2
Cabin1	0.042938	0.46907	4	0.35347	-3.6354	1	0.43166	-1.3984	2	0.47921	-7.5069	1
Slc30a5	0.042975	-0.10763	3	0.22094	0.47577	3	0.32042	-6.6455	2	0.15587	-2.9596	2
Nabp2	0.043062	1.011	4	0.88213	-1.4722	0	0.62532	-3.4818	1	0.070581	0.36143	4
Unc13a	0.043117	0.094085	3	0.87478	-4.2707	1	0.26362	0.16953	3	0.4671	-1.7725	2
Pfkp	0.043159	1.0386	3	0.7702	-1.8036	1	0.39591	-2.7589	2	0.82958	-1.0183	0
Nog	0.043238	1.0313	4	0.67109	-0.7597	2	0.78813	-8.0906	1	0.21001	-1.6346	2
Reg4	0.043259	1.0147	3	0.24889	-0.57898	1	0.75514	-4.0085	0	0.611	-4.5464	1
Dtx4	0.043285	-0.90826	2	0.40976	-0.91463	3	0.7713	-8.1812	1	0.080507	0.15388	3
Clrn2	0.043291	0.64667	3	0.16765	0.40164	4	0.75542	-4.735	1	0.90276	-2.4986	0
Spata5	0.043314	2.511	1	0.42932	-0.92819	0	0.43607	-7.1326	0	0.58654	-7.1041	0
Pmm2	0.043322	1.0695	4	0.26993	0.43768	3	0.73748	-5.1422	1	0.89633	-4.2518	0
AA792892	0.043354	1.0599	3	0.043721	1.9476	2	0.18213	0.50813	3	0.20255	-1.6149	2
Nmnat3	0.043479	-0.53891	3	0.69168	-1.6775	2	0.049558	-0.38291	3	0.6732	-0.88612	2
Cnot10	0.043494	2.2926	1	0.19817	0.89666	1	0.59597	-7.6982	0	0.6853	-3.6987	0
Dmc1	0.043593	-1.4073	1	0.13355	0.57621	3	0.70942	-7.2885	1	0.55436	-1.8531	1
Wnt2	0.043615	0.94617	4	0.83684	-0.97684	1	0.22685	-7.9736	2	0.17793	0.54964	3
Cabp5	0.043666	-0.38638	2	0.50228	-1.3435	2	0.42241	-1.3675	2	0.38428	-0.89634	2
Tnfaip8l1	0.043679	1.2928	3	0.46804	-0.065138	2	0.9181	-8.11	0	0.49956	-0.89429	2
Capn5	0.043774	1.4749	3	0.044514	-0.93485	2	0.24727	-1.3775	2	0.13411	-1.056	2
CTRLHS_57285	0.04378	1.9408	1	0.53298	-0.99015	0	0.32006	-0.74223	0	0.90642	-2.9783	0
Ino80e	0.043816	1.3294	3	0.6872	-6.6775	1	0.13537	-3.4449	1	0.77741	-0.28263	1
Kctd6	0.043842	0.51389	2	0.35482	-1.8928	1	0.51098	-6.7369	1	0.57197	-0.2313	2
Ttc37	0.043863	-3.2259	3	0.23639	-0.68847	3	0.80901	-7.5276	1	0.87048	-3.5803	0
Lrrtm3	0.043956	0.50636	3	0.87817	-4.4529	0	0.35961	-7.5222	2	0.16798	0.54368	3
Kctd17	0.044061	-1.1703	2	0.27366	0.23028	3	0.12663	-2.9627	2	0.65085	-2.009	2
Mrto4	0.044097	2.3879	1	0.058315	2.0157	1	0.24184	-2.494	1	0.77382	-7.1009	0
Vmn2r3	0.044106	1.202	3	0.16072	-0.75104	2	0.93406	-7.2137	0	0.78633	-1.3951	1
Ctsz	0.044127	0.49406	3	0.99194	-1.9468	0	0.3476	-4.5384	2	0.5161	-3.902	1
Dcaf15	0.04416	0.57485	4	0.16187	0.57874	3	0.58198	-8.6008	1	0.35311	-0.91649	2
Ing4	0.04424	-1.3884	2	0.53546	-1.2396	2	0.46328	-2.9034	2	0.78783	-1.9526	1
Ccdc23	0.044299	-2.4483	1	0.47044	-0.02114	2	0.053404	0.92178	2	0.87688	-2.6921	0
Srpk3	0.044329	0.73923	4	0.85624	-0.68994	1	0.60561	-4.907	1	0.42226	-2.0425	2
Otog	0.04443	-4.0502	1	0.60102	-1.7558	2	0.29676	-4.6852	1	0.30603	-4.0398	1
Mmgt2	0.044601	1.2863	4	0.07715	-1.3469	2	0.81637	-0.94288	0	0.234	0.30199	3
Rhox7	0.044605	-0.9495	2	0.98007	-3.5383	0	0.056814	-3.5084	2	0.36201	-2.1792	2
Mgrn1	0.044675	0.97587	4	0.26128	-0.79455	3	0.42292	-8.1342	2	0.96846	-1.9825	0
Clcn7	0.04474	0.8773	3	0.67857	-1.6866	1	0.63319	-1.6064	1	0.4878	-1.8929	1
Cdh15	0.044818	-4.5605	1	0.60524	-2.6298	1	0.87279	-7.9004	0	0.86918	-2.7519	0
Musk	0.044868	0.43964	4	0.72206	-1.3891	1	0.39254	-0.83048	2	0.71509	-0.74412	1
Ugt2b5	0.045082	-0.89421	1	0.88016	-3.576	0	0.92643	-4.6803	0	0.27833	-4.9469	2
Mrgpra6	0.045094	0.58341	4	0.34657	0.14961	2	0.060692	-3.1245	1	0.73223	-0.95567	1
Hmg20a	0.045163	-0.15298	2	0.59274	-1.8626	1	0.39854	-3.933	2	0.11267	-1.5508	2
Cecr5	0.045213	0.74606	3	0.92752	-1.6778	0	0.61854	-6.2666	1	0.0193	0.57816	3
CTRLMM_66621	0.045229	2.413	1	0.59446	-3.3056	0	0.32831	-1.6296	0	0.38593	-0.7994	0
Lmtk3	0.045343	-1.3036	2	0.17499	0.37569	4	0.3081	-3.4497	3	0.34306	-0.80917	2
Usp43	0.045506	0.75978	4	0.53194	-1.3609	2	0.51459	-5.0471	1	0.19479	0.16001	3
CTRLMM_67169	0.045588	1.8752	1	0.024524	1.9436	1	0.1083	1.5274	1	0.16602	0.79539	1
Pigf	0.04561	-0.12187	2	0.35786	-1.3102	2	0.8302	-4.2289	0	0.74891	-5.1783	1
Skp1a	0.045709	-0.11602	3	0.66082	-0.28126	2	0.27473	-0.11109	3	0.36266	-1.0927	3
Hivep2	0.045729	-4.7285	2	0.76132	-2.6213	1	0.59817	-6.3316	1	0.39438	-0.19148	1
CTRLHS_57399	0.045816	1.887	1	0.74301	-1.6887	0	0.94602	-8.7213	0	0.81076	-2.0651	0
Tmem129	0.045818	1.8856	3	0.91039	-3.0306	0	0.42709	-6.0737	1	0.94443	-3.7289	0
Myom2	0.045866	-1.433	2	0.71725	-2.2229	2	0.18651	-3.1772	3	0.66004	-1.0314	1
Dcaf7	0.045869	-0.146	2	0.099864	0.54113	4	0.54283	-7.1819	1	0.40516	-0.53148	2
Lonp1	0.045889	-2.2366	1	0.75129	-3.6648	0	0.88875	-7.4631	0	0.7921	-4.5735	0
Xpnpep1	0.045956	0.85512	4	0.72313	-3.1421	1	0.35277	-0.8505	2	0.91972	-7.6095	0
AF067063	0.046044	-1.3991	1	0.19625	-1.2538	2	0.44846	-7.9418	2	0.73095	-1.3516	1
Rfpl3s	0.046114	-4.2283	2	0.10434	-0.0834	3	0.0010033	2.0306	5	0.13013	-0.4926	3
Best3	0.046214	-2.1695	1	0.13883	0.51324	4	0.90339	-8.3219	0	0.11117	0.41851	4
Gstt1	0.046217	0.80347	4	0.24487	-0.40719	2	0.42479	-3.2581	2	0.12573	0.36426	4
Ccdc24	0.046418	0.1013	2	0.27686	0.08102	2	0.20264	-6.5148	1	0.58281	-3.4906	1
Col4a1	0.046442	0.94514	4	0.3702	-0.12804	3	0.84262	-3.5002	0	0.42244	-0.91147	1
Mllt11	0.046466	0.62863	4	0.75127	-1.6966	1	0.86456	-7.4021	0	0.88033	-4.967	0
Cyp19a1	0.046467	0.027945	3	0.095471	0.6759	4	0.86119	-7.7994	0	0.27657	-2.531	2
Tac4	0.046632	0.23082	3	0.88814	-3.6489	1	0.35975	-4.2325	2	0.62958	-1.1563	1
Ube2q2	0.046677	1.0436	3	0.12302	0.21075	3	0.52834	-1.6519	1	0.031224	0.51314	4
Gm13157	0.046689	2.4777	1	0.56277	-3.2838	0	0.42486	-7.0794	0	0.57454	-7.0508	0
Sepp1	0.04669	0.66981	4	0.37013	-1.1132	2	0.86645	-7.3051	0	0.90438	-3.1247	0
Tmem56	0.046749	-0.67824	1	0.26431	0.075092	2	0.65734	0.0017118	1	0.47133	-0.3852	2
Ngef	0.04678	0.4828	3	0.97287	-3.0943	0	0.019474	-3.5378	2	0.27528	-0.1477	2
Ap4b1	0.046815	-2.5277	2	0.51196	-2.5613	1	0.21438	0.12742	3	0.3909	-6.8012	1
Arid3c	0.046906	1.4166	2	0.7995	-2.3551	0	0.77684	-8.1458	0	0.010483	2.1821	2
Pxdn	0.046946	-0.39776	2	0.9062	-1.2439	0	0.13104	-0.068467	3	0.19848	-1.0333	2
G630090E17Rik	0.046961	-2.5367	1	0.53499	-3.5101	1	0.48917	-7.5837	1	0.93335	-5.4363	0
Tubb4a	0.046964	1.2463	3	0.33002	0.16146	3	0.49864	-3.2032	2	0.20624	0.37084	3
9130409I23Rik	0.046996	0.98805	3	0.78654	-1.0478	0	0.41541	-0.57257	2	0.63561	-1.6089	1
Pkn3	0.047024	1.2216	3	0.092497	-2.1287	2	0.56919	-1.3238	1	0.76853	-4.0059	1
Dpagt1	0.047043	0.31758	3	0.1228	1.1433	2	0.39428	-4.7839	1	0.32202	-3.2707	1
Gmip	0.047071	0.57603	3	0.6427	-1.8179	2	0.22931	-1.2841	2	0.96342	-3.2263	0
Terf2	0.047108	2.5028	1	0.55059	-3.2028	0	0.40819	-6.9981	0	0.55751	-6.9696	0
Galnt12	0.047128	0.96943	3	0.72377	-2.7487	1	0.050458	-1.8995	2	0.66712	-4.6385	1
Atp8b3	0.04715	1.0011	4	0.26482	0.37456	3	0.1394	-5.2758	1	0.52748	-1.0174	2
Elf1	0.047222	0.67087	4	0.92387	-0.41905	0	0.5146	-0.17785	2	0.29064	0.064204	3
Oxgr1	0.047225	-0.262	3	0.36416	-0.35001	3	0.94886	-6.8652	0	0.59507	-0.96238	2
Emx2	0.047249	-2.113	1	0.24779	-0.039335	2	0.77205	-5.3882	0	0.069947	-3.854	1
Dnajc17	0.047262	2.3118	1	0.57112	-2.3664	0	0.59704	-5.9824	0	0.73359	-4.0982	0
Rhoh	0.047267	1.1732	4	0.419	-2.1008	1	0.3349	-7.7637	2	0.53589	-0.36609	2
Depdc5	0.047267	-1.8663	1	0.62023	-3.8906	0	0.016227	1.0375	2	0.89711	-5.0527	0
Tgm2	0.047305	1.189	3	0.59789	-0.34482	1	0.67939	-3.7428	1	0.19066	0.38204	3
Iqsec2	0.047331	-1.4552	1	0.48203	-0.293	2	0.24816	-8.022	2	0.84166	-0.52506	0
Ahcyl1	0.04737	0.73712	4	0.59001	-1.1302	2	0.42953	-4.2743	1	0.7579	-1.437	1
Fnbp1	0.047408	1.2312	3	0.53599	-3.52	1	0.94054	-6.45	0	0.41826	-0.91995	2
Zfp85-rs1	0.047464	-5.1022	1	0.65424	-1.5456	2	0.7981	-6.815	1	0.98238	-2.2856	0
Rbm25	0.047472	1.9325	3	0.8192	-2.3551	0	0.57558	-2.7702	1	0.4985	-7.3342	1
Steap2	0.047524	0.88609	4	0.13237	0.44286	4	0.97718	-8.0124	0	0.4433	-0.91361	2
1700123O20Rik	0.04764	-0.81788	2	0.6418	-0.94903	1	0.78752	-0.38479	0	0.48458	-1.3806	2
Vmn1r6	0.047655	0.73882	2	0.40073	-3.9337	1	0.65406	-6.8714	1	0.67595	-4.2963	1
Fbxo22	0.047727	-0.40193	3	0.74057	-0.72738	1	0.33591	-0.032523	2	0.56501	-0.08901	2
Krt28	0.047988	-1.1635	1	0.48824	-0.52854	2	0.25203	-6.2194	2	0.89365	-2.431	0
Golga7b	0.048064	0.31737	3	0.68794	-1.9919	1	0.78436	-2.6289	0	0.60259	-1.6668	1
BC021891	0.048095	1.0536	4	0.57551	-3.0385	1	0.93825	-7.5451	0	0.59305	-1.2589	1
Rprd2	0.048107	0.59831	4	0.10794	-0.27086	2	0.55507	-3.9431	2	0.27507	-0.17496	3
Marf1	0.04811	-0.57037	2	0.71949	-0.82594	1	0.056952	0.92222	4	0.98042	-2.5746	0
5430401F13Rik	0.04817	0.37346	2	0.14906	0.4796	2	0.069723	1.2374	3	0.19659	-0.63399	2
Nrip2	0.048195	1.3122	3	0.95375	-3.6169	0	0.75472	-7.4231	1	0.73893	-2.3952	1
Phf23	0.048357	-5.7538	2	0.41711	-0.88452	1	0.88674	-7.7694	0	0.060683	-0.00044787	3
Rif1	0.048384	0.84385	4	0.35048	-1.2613	2	0.31467	-0.97859	2	0.34358	-2.0969	3
Polq	0.048413	-2.4744	2	0.99725	-4.4412	0	0.60114	-5.8716	2	0.4823	-0.16376	2
CTRLHS_57131	0.048415	2.001	1	0.55997	-1.3296	0	0.83441	-8.2979	0	0.23445	0.41751	1
Dbf4	0.04848	1.11	3	0.042261	0.77878	3	0.22028	-2.0998	1	0.44819	-0.81615	2
Cep72	0.048558	1.1622	3	0.42176	-1.2549	1	0.19991	0.21849	3	0.47022	-0.24881	1
Stard4	0.048558	1.5207	2	0.85563	-1.3307	0	0.86388	-7.3401	0	0.83471	-1.5346	0
Snx20	0.048578	0.31306	3	0.58801	-1.1201	2	0.42995	-3.5978	1	0.65091	-1.6166	1
Kif19a	0.048582	1.2601	3	0.48311	-1.7188	2	0.26875	-2.5545	2	0.01579	-0.57453	2
Msln	0.048731	-0.090852	2	0.47084	-2.2027	1	0.18035	-3.3072	2	0.98591	-4.2463	0
Fbxo43	0.048743	-0.69754	3	0.81955	-0.087402	1	0.50764	-1.5934	2	0.78188	-2.3673	1
Ifit2	0.048813	-3.8289	1	0.009497	1.5834	4	0.44782	-4.4833	2	0.68083	-0.73107	1
CTRLMM_67219	0.049012	2.1184	1	0.35365	-0.13224	0	0.69196	-7.9467	0	0.068578	1.8663	1
Calm3	0.04902	-2.6228	2	0.66874	-0.84163	1	0.91445	-6.9705	0	0.20551	-1.7131	3
Laptm4b	0.049069	0.99796	2	0.043122	-0.74275	2	0.43143	-2.4828	1	0.6145	-4.8765	1
Skint11	0.04908	0.35193	3	0.8299	-1.0603	0	0.67005	-4.7293	0	0.86808	-3.2509	0
Numa1	0.049084	2.4485	1	0.12967	1.5454	1	0.24287	0.2835	1	0.57131	-7.0357	0
Slc17a9	0.049097	0.24895	4	0.54548	-0.76607	2	0.46525	-1.8791	1	0.32513	-0.49872	3
Asf1a	0.049139	1.2981	4	0.94144	-1.5206	0	0.087089	-2.6554	2	0.95136	-1.8455	0
Tmem90a	0.049165	1.1374	3	0.87406	-1.4771	0	0.89833	-6.7582	0	0.25911	0.19059	3
Ept1	0.049195	0.56999	4	0.33544	-0.23341	2	0.35119	-1.7055	2	0.38839	-1.3129	2
Vdac3	0.049197	1.1263	3	0.70037	-3.6142	1	0.16942	0.71557	2	0.78403	-1.0799	0
Cdc25c	0.049203	0.72303	4	0.97294	-1.669	0	0.35443	-1.8032	2	0.68752	-1.8001	1
Ces1b	0.049236	-0.76284	1	0.48379	-1.1697	1	0.042333	1.2096	4	0.27986	-0.33417	2
Clec4e	0.049314	-0.79687	1	0.063682	0.61713	3	0.28546	-2.5185	1	0.28937	-0.5116	1
Sdk2	0.049456	-1.2106	1	0.85445	-1.3348	0	0.30565	-0.63094	2	0.46749	-1.9943	2
Med18	0.049475	-1.5675	2	0.41678	-0.045107	3	0.16473	-4.4661	2	0.98999	-5.279	0
Hint1	0.049491	0.6159	3	0.85875	-2.2938	0	0.42872	-4.0242	1	0.465	-0.1728	1
CTRLHS_57850	0.049551	1.8134	1	0.52838	-0.90993	0	0.95582	-8.7893	0	0.2858	0.072639	0
Krt34	0.049644	1.2559	3	0.51782	-4.3924	1	0.72531	-7.0164	1	0.73728	-3.4202	1
Scn2b	0.049678	0.15658	3	0.36658	-1.1867	2	0.32426	-5.6967	1	0.81016	-2.6283	1
Rasd2	0.049755	0.31137	3	0.3051	0.19825	3	0.33647	-2.8881	2	0.55516	-0.65286	2
Gm9992	0.050061	-1.9202	2	0.95204	-4.744	0	0.27611	-0.61869	2	0.90689	-7.1212	0
Gcdh	0.050071	0.70009	4	0.039022	0.80417	4	0.15312	0.18511	3	0.095955	0.066042	3
Cryzl1	0.050073	1.2506	3	0.13052	-0.63809	2	0.99633	-8.1404	0	0.054144	0.54187	3
Clec2i	0.050213	0.97896	2	0.095946	0.8724	2	0.67371	-3.0872	0	0.1008	-2.774	1
Klhdc8a	0.050267	-1.0608	2	0.62076	-0.7787	2	0.89226	-4.7834	0	0.059906	0.68793	4
Slc35d2	0.050291	0.9369	4	0.50028	-2.9792	2	0.70403	-7.3649	1	0.99933	-4.623	0
Rbm3	0.050378	1.2652	3	0.60494	-0.58977	1	0.0066557	2.6522	2	0.97479	-7.5534	0
Ddx46	0.050439	1.3476	3	0.049769	-2.0296	1	0.3995	-6.9236	1	0.31419	-3.4461	1
Grsf1	0.050551	0.95969	3	0.9501	-4.4572	0	0.093827	0.66707	3	0.80895	-2.6226	0
Fer1l4	0.050598	0.99626	4	0.017041	0.088436	3	0.97943	-7.4404	0	0.5116	-3.4149	2
Plac1l	0.050627	1.1494	3	0.063906	0.7185	3	0.956	-8.3956	0	0.79101	-0.93833	0
Ckap2	0.050903	-1.0775	2	0.33596	-0.15114	2	0.92964	-3.811	0	0.23019	-0.34576	3
Tmem189	0.050936	0.52238	4	0.085755	0.44986	3	0.94787	-8.5622	0	0.75396	-1.4357	1
Tas2r118	0.051079	0.67631	4	0.95276	-1.4669	0	0.65435	-1.5714	1	0.73515	-1.5911	1
Bcl6	0.051083	0.85949	4	0.2903	-0.37292	3	0.78107	-0.89418	1	0.75703	-3.5344	1
Trpa1	0.051175	0.32289	3	0.41818	-0.0060187	2	0.45245	-5.114	1	0.73878	-0.33275	1
Des	0.051237	-0.36506	3	0.76191	-2.1323	1	0.62755	-5.0441	1	0.94127	-2.2026	0
Serpinf1	0.051283	-4.8208	1	0.46862	-3.2572	2	0.3417	-5.3867	2	0.71191	-1.1865	1
Pak3	0.05133	-1.883	2	0.47	-2.9038	2	0.50376	-4.2221	1	0.85467	-1.3483	0
Zfp455	0.0514	0.29913	3	0.87513	-1.3615	1	0.31578	-1.358	3	0.8297	-2.0242	1
Ggps1	0.05142	0.58818	4	0.070786	0.93749	4	0.68934	-1.6873	1	0.8088	-1.8284	1
Mnx1	0.051481	-4.5152	1	0.088089	-0.77475	2	0.68366	-3.7244	0	0.0017541	0.48513	2
Lrrc46	0.051547	-0.053203	2	0.47726	-1.4242	2	0.0094669	1.847	4	0.21785	-1.9837	2
Fam54a	0.051797	-0.83167	3	0.71987	-1.3213	1	0.10928	-3.8969	3	0.59248	-2.4225	1
Itih4	0.051836	0.30039	3	0.41668	-1.285	3	0.26593	-5.2947	2	0.69746	-2.4087	1
Rftn1	0.051876	0.21805	3	0.3441	-0.74419	2	0.35031	-6.083	2	0.76037	-1.9879	1
Dusp11	0.051933	1.9204	2	0.40502	-0.16268	1	0.85075	-4.6603	0	0.35701	-0.32527	1
Nfrkb	0.051956	0.78058	4	0.43373	-2.2549	1	0.94288	-5.1275	0	0.91349	-4.6208	0
Igfbp1	0.051957	0.39936	2	0.54672	-2.4101	1	0.59518	-2.9744	1	0.94467	-5.4355	0
4933402P03Rik	0.051972	-0.65099	2	0.33316	-0.37936	2	0.59261	-7.0621	1	0.97686	-5.0718	0
Uckl1	0.051982	0.64316	4	0.43486	0.063481	3	0.19025	0.044325	3	0.29541	0.032027	3
Arid3a	0.052084	0.66403	2	0.90841	-1.7796	0	0.15463	0.86098	2	0.74577	-1.3604	0
Chst5	0.052198	1.2857	2	0.5108	-0.92699	1	0.15487	-2.412	1	0.4947	-0.96581	0
Fmo9	0.052223	-0.41527	3	0.70309	-2.9299	1	0.6591	-5.0323	1	0.56093	-4.3537	2
F2r	0.052285	0.87707	4	0.59497	-0.48856	2	0.56611	-2.3405	2	0.22557	-1.05	2
Il17rc	0.052384	0.79741	4	0.021914	-1.1992	2	0.79489	-3.4632	1	0.89301	-1.0944	0
Hist1h4d	0.052431	2.0822	1	0.21806	0.7242	1	0.68013	-7.9174	0	0.39433	-0.68112	0
Hoxd3	0.052515	1.3157	2	0.53416	-1.3483	1	0.7991	-5.7606	0	0.56793	-3.2957	1
1700125D06Rik	0.052596	0.85333	3	0.66904	-1.0979	1	0.58188	-6.729	1	0.40971	-1.5928	2
Mthfd1	0.052599	0.56546	4	0.025126	-0.041828	2	0.76494	-1.3372	1	0.74467	-0.96211	1
Lpar3	0.05261	0.79581	3	0.31326	-1.4357	2	0.76863	-1.9805	0	0.029882	0.56762	4
Gbp11	0.05265	0.78416	4	0.56829	-0.14089	2	0.41655	-4.0461	1	0.4955	-2.1702	2
Pcdhb1	0.052683	-2.4753	2	0.96784	-2.5023	0	0.91515	-7.0228	0	0.85437	-1.5473	1
Prkcq	0.052772	0.62164	4	0.46758	-0.62777	2	0.093533	0.44214	4	0.13902	0.33865	4
Stt3a	0.052784	1.2422	4	0.6217	-2.0494	1	0.020995	-2.4413	3	0.72205	-6.0602	1
Pramef6	0.052795	-2.17	1	0.4737	-1.7853	1	0.0079644	2.2006	4	0.76399	-5.1929	1
Egfl6	0.052807	-0.33996	2	0.99651	-5.308	0	0.59093	-4.1691	1	0.17017	0.48093	3
5530400C23Rik	0.052863	0.39637	3	0.36105	-1.2741	1	0.79939	-7.838	0	0.23102	-0.46518	1
Gm608	0.052959	1.5798	2	0.74426	-0.63099	0	0.82741	-7.2972	0	0.33586	-2.0014	1
Ikzf5	0.053064	0.65	3	0.6201	-0.67935	2	0.63071	-7.6518	1	0.23434	-1.8363	2
Pmp22	0.053093	0.26669	3	0.58718	-2.8925	1	0.33619	-5.645	1	0.53641	-1.3945	1
Myo19	0.053151	0.88938	4	0.85345	-4.5863	1	0.48236	-6.7108	2	0.59642	-1.5656	2
Vdr	0.053199	-0.59739	3	0.28598	-1.4755	2	0.26734	-0.065821	3	0.20669	-0.22281	3
Vmn2r109	0.053258	0.31288	4	0.032988	-0.59809	1	0.85303	-2.9559	0	0.57271	-1.1296	2
Casz1	0.053266	1.7977	1	0.46367	-0.64682	0	0.5365	-3.6264	0	0.61385	-3.4725	0
Sdc2	0.053298	0.95077	3	0.95277	-4.402	0	0.57353	-7.332	1	0.1809	0.52447	2
Rtkn	0.053329	0.7741	2	0.04378	1.4463	3	0.2949	-4.6968	2	0.16871	-0.77268	1
Uggt1	0.053376	-0.44006	2	0.22099	0.40951	3	0.99679	-7.8474	0	0.000909	-0.57525	2
Mesdc2	0.0534	1.1198	3	0.45463	-0.098399	2	0.25231	-2.6088	2	0.56801	-2.9482	1
Ndufa11	0.05349	0.49886	3	0.99198	-7.1962	0	0.79584	-6.3883	0	0.3565	0.049986	2
Plk4	0.053556	0.27452	4	0.6286	-0.68649	2	0.14512	-0.76932	2	0.24102	-1.2634	3
Smyd1	0.053568	-0.61215	1	0.25371	0.27996	3	0.99429	-4.907	0	0.64561	-2.4946	1
Hsd3b6	0.053821	-0.045844	2	0.24864	-0.9246	2	0.81358	-7.8834	0	0.31841	-0.097681	2
Tas2r144	0.053832	0.69439	4	0.29169	-0.65981	2	0.28663	-0.67238	2	0.42437	-1.961	2
Clasp2	0.053862	1.348	3	0.056063	1.2247	3	0.91713	-7.5524	0	0.63846	-4.156	1
Dopey1	0.05389	-2.5863	2	0.25955	-0.56737	3	0.72656	-4.7861	1	0.32497	0.1888	3
Usp18	0.054083	-6.9456	1	0.86475	-2.4426	0	0.90703	-7.4974	0	0.66295	-4.3639	1
Atp5g2	0.054262	0.94322	3	0.45558	-0.8577	1	0.083341	-0.66778	2	0.13989	0.57986	3
Ercc5	0.054382	0.74403	4	0.15347	0.29568	3	0.78539	-8.0337	1	0.70796	-1.1689	1
Gpr63	0.05439	0.84573	4	0.68315	-0.30993	1	0.69488	-0.20801	1	0.62095	-2.1377	1
Gnpat	0.054415	0.32039	3	0.0020357	1.5028	4	0.19804	-0.93136	3	0.79909	-4.7401	1
Osbpl9	0.054474	-0.73427	2	0.82826	-1.4768	0	0.67333	-1.9164	1	0.95815	-3.1802	0
Tekt3	0.054479	0.63453	4	0.029689	0.99099	4	0.73605	-7.2355	1	0.58743	-2.1153	2
Fam114a1	0.054549	0.39257	3	0.80505	-0.86046	0	0.56499	-1.7682	1	0.41861	0.055706	1
Pou6f1	0.054554	1.0055	3	0.080643	0.87931	3	0.77239	-7.1358	1	0.032549	-1.4077	2
Cenpa	0.054566	1.063	4	0.025739	0.70294	5	0.022236	-0.081887	3	0.67842	-2.9015	1
Hsd17b10	0.054727	-1.3375	2	0.51266	-0.38592	2	0.88681	-7.5392	0	0.21813	-1.6098	2
4931429L15Rik	0.054772	-2.3531	1	0.71411	-0.71622	1	0.58703	-8.1573	1	0.87897	-0.93911	0
Bpi	0.054867	-0.69958	1	0.59858	-2.8592	1	0.93879	-7.6867	0	0.51087	-0.78511	1
Mis18a	0.054965	0.94884	3	0.46632	0.24044	2	0.88159	-7.4144	0	0.96396	-7.1615	0
Gm6614	0.054979	0.5256	3	0.04806	0.79789	5	0.11353	-4.2754	1	0.61928	-4.3802	1
C1ql4	0.055241	-0.56828	2	0.14592	0.55265	4	0.50299	-4.8375	2	0.79189	-4.3469	1
Prr22	0.055324	-1.2528	2	0.56057	-3.3087	2	0.1567	0.073792	3	0.73938	-3.2326	1
Rnh1	0.055435	-1.1714	3	0.21405	0.17541	3	0.19607	-2.5295	3	0.51156	-0.83613	2
Jmjd1c	0.055487	-1.5336	2	0.48462	-4.0277	1	0.77485	-5.9197	0	0.67554	-1.8986	1
Grtp1	0.055541	1.0264	3	0.67156	-0.87442	1	0.82422	-6.9918	0	0.64832	-2.1583	1
Odc1	0.055545	-0.34698	2	0.038818	1.4416	3	0.23897	-3.4008	2	0.91171	-2.1966	0
Zap70	0.055632	-0.0097704	2	0.81537	-2.4831	0	0.8986	-6.7605	0	0.80987	-2.623	0
Nol6	0.055674	2.2896	1	0.43624	-0.95692	0	0.28217	-2.7536	1	0.77934	-5.3065	0
Ccdc55	0.055843	1.7481	2	0.31107	0.24537	2	0.26599	-0.67744	1	0.87909	-2.3157	0
Cst10	0.055858	-0.52688	2	0.98083	-2.149	0	0.86972	-5.1137	0	0.30823	-1.1017	2
C8a	0.055876	0.53852	4	0.046773	0.80305	3	0.82605	-3.6515	0	0.040632	-0.48807	2
H2-M10.5	0.055978	-0.64437	2	0.49646	-3.8642	1	0.94396	-7.3804	0	0.41177	-1.4699	1
Rfx2	0.055981	1.1759	3	0.90931	-2.732	0	0.4037	-2.8189	2	0.70312	-7.6283	1
Masp2	0.056018	-3.332	2	0.51895	-2.6379	1	0.26094	-7.4846	1	0.028434	1.4178	3
CTRLHS_57851	0.056117	1.6804	1	0.64113	-1.204	0	0.97148	-8.9473	0	0.92648	-2.4414	0
Gm12597	0.056153	-2.5939	2	0.3616	-0.92789	2	0.83822	-7.2844	0	0.041158	0.47699	4
Cdkl4	0.0562	0.27272	4	0.093488	0.61607	4	0.49049	-2.8765	2	0.73551	-4.7267	1
Accn3	0.056306	0.97953	3	0.72426	-1.8657	1	0.96201	-7.8542	0	0.95333	-2.2579	0
Nlrx1	0.056327	-2.1608	2	0.66877	-3.871	1	0.91164	-7.3872	0	0.80458	-1.3448	1
Gm5150	0.056385	-0.32399	3	0.84244	-2.9193	1	0.48277	-2.5516	2	0.28519	-0.87896	2
Ppih	0.056552	-2.2068	1	0.2665	0.66593	1	0.75796	-4.5416	0	0.89072	-4.9129	0
BC027231	0.056703	1.7106	2	0.067578	0.94521	2	0.53176	-4.8283	1	0.11697	1.3674	2
Galk1	0.056762	0.27905	4	0.081177	0.44803	4	0.095997	-0.49427	2	0.30717	-1.8171	2
Tdpoz3	0.056808	0.48	4	0.27178	0.36291	3	0.94769	-7.2511	0	0.16827	-1.6437	3
Znrf2	0.05688	0.49116	4	0.1316	0.84421	3	0.62383	-7.6807	1	0.1768	0.45566	3
Tas2r139	0.056907	-1.7106	2	0.23076	-2.1145	3	0.71649	-7.7796	1	0.88419	-4.6102	0
Rpf2	0.056961	2.3094	1	0.41849	-0.81027	0	0.43667	-7.135	0	0.587	-7.1065	0
Sdr16c6	0.057052	0.76545	4	0.85116	-1.1601	1	0.24542	-1.5162	3	0.80647	-1.8716	1
Gm5538	0.057104	0.73325	4	0.058435	0.16381	3	0.69322	-7.4649	1	0.85511	-5.4035	0
Zfp629	0.057115	1.6031	2	0.16983	-1.6773	1	0.26002	-7.5371	1	0.16223	-0.65471	1
Vit	0.057149	-1.5036	1	0.16124	-0.71537	1	0.46608	-5.5194	1	0.89664	-1.5048	0
Pno1	0.057162	1.7154	1	0.83089	-1.9536	0	0.54826	-1.5596	0	0.29099	0.045277	0
Rcbtb2	0.057287	0.24419	4	0.18318	0.43659	4	0.67461	-6.7061	1	0.57165	-0.24545	1
Mum1	0.057303	-0.13837	3	0.85421	-1.6065	1	0.89715	-7.4521	0	0.77335	-2.8893	1
Gfi1	0.057313	0.6696	3	0.78507	-1.4156	0	0.28593	-0.55997	2	0.71182	-1.5043	1
Hes6	0.057316	0.25503	3	0.08048	-0.84347	1	0.89231	-8.6348	0	0.82385	-3.7015	0
Mageb3	0.057378	0.16406	3	0.89481	-1.8524	0	0.58957	-4.4897	2	0.89856	-0.82146	0
Trpc1	0.057458	-0.22679	1	0.34134	-1.5415	2	0.23665	-4.2956	1	0.08353	0.96643	3
Ndor1	0.057484	0.8227	4	0.26619	0.14283	3	0.82019	-2.1323	0	0.88932	-3.0268	0
Arhgap28	0.057495	0.79871	4	0.91276	-3.1873	0	0.91276	-6.2487	0	0.99042	-7.4049	0
Tcp11	0.057514	1.2565	3	0.021366	1.1073	4	0.34512	-5.5243	2	0.70705	-0.83981	1
Fmo4	0.057543	-0.33976	3	0.79162	-1.8347	1	0.86888	-6.5821	0	0.28617	-0.07068	3
Ptplad1	0.057591	-0.034449	2	0.20668	0.56507	3	0.77857	-7.7603	1	0.63938	-0.63887	2
Slc5a2	0.057653	-0.639	1	0.75697	-3.9938	1	0.84541	-6.5182	0	0.64218	-1.9704	2
Crxos	0.05767	0.45407	3	0.054277	-0.71414	2	0.14475	-2.2813	3	0.089026	0.57896	4
Scyl2	0.057672	-0.48868	3	0.69411	-0.66909	2	0.47557	-2.2435	2	0.83622	-1.921	1
Myo18b	0.057731	0.712	4	0.70015	-1.7078	1	0.19152	-3.1482	3	0.57197	-1.2049	2
Eea1	0.057743	-0.53284	2	0.41006	-0.8754	2	0.97409	-7.4605	0	0.3605	-1.3288	1
Mctp2	0.057784	-0.77897	3	0.89561	-0.2007	0	0.9771	-6.3444	0	0.14491	-1.1613	2
CTRLHS_57974	0.057847	1.5527	1	0.99621	-4.5404	0	0.16751	0.85097	1	0.31204	-0.052729	0
Fam54b	0.057857	0.56835	3	0.29057	-1.6516	2	0.7739	-6.0799	1	0.7359	-0.24282	1
Esx1	0.057869	1.1958	3	0.43029	-1.6232	2	0.39063	-7.254	2	0.91176	-7.2255	0
Gc	0.057887	0.96805	4	0.58881	0.051565	2	0.35881	-3.6539	1	0.035282	0.89177	4
Scgb2b24	0.057921	-2.9155	1	0.95423	-3.9639	0	0.71972	-2.9022	1	0.44827	-0.355	1
ORF61	0.057922	0.4908	4	0.55748	-2.0118	1	0.53128	-2.0435	1	0.48245	-0.37712	2
CTRLMM_67067	0.057989	2.069	1	0.80563	-7.4174	0	0.61527	-7.7495	0	0.75622	-5.1617	0
Atrip	0.057995	1.8283	1	0.93166	-4.3198	0	0.80702	-3.8426	0	0.49158	-1.1064	0
Gm10094	0.058005	1.734	2	0.93158	-2.4727	0	0.83357	-7.1978	0	0.044045	1.1739	2
Magee2	0.05802	-2.5601	2	0.72447	-0.26283	2	0.59799	-3.3069	2	0.66742	-1.1813	2
Ptprj	0.058052	0.53559	4	0.60232	-0.65826	1	0.74491	-3.913	1	0.82067	-2.5793	1
Gabra5	0.058264	0.43794	4	0.21658	-0.25552	2	0.94482	-4.0332	0	0.53073	-2.2395	1
Zcchc6	0.058362	0.10257	3	0.77949	-0.90776	1	0.65734	-5.3578	1	0.48412	-2.5401	1
CTRLMM_67238	0.058384	2.0848	1	0.089386	1.6505	1	0.59279	-5.4102	0	0.70801	-4.2297	0
2310002J15Rik	0.058427	1.2748	3	0.69888	-1.4628	1	0.1016	1.0664	3	0.063026	-2.1186	1
Ccdc148	0.058524	0.4893	3	0.62656	-4.6367	1	0.95012	-7.2499	0	0.61902	-2.887	2
CTRLHS_57108	0.058574	1.8591	1	0.086849	1.4711	1	0.84349	-8.3231	0	0.21803	0.52323	1
Hhat	0.058577	0.50757	4	0.73764	-2.5976	1	0.91184	-3.938	0	0.7465	-1.5535	1
Xrcc3	0.058648	0.23661	2	0.30147	0.35558	2	0.30336	0.29377	2	0.77788	-7.0464	0
Nol8	0.058703	1.2281	2	0.85863	-2.9986	0	0.85243	-7.0341	0	0.84709	-1.0262	0
Fam161a	0.058729	-0.50944	3	0.39423	-0.87673	2	0.21634	-1.469	2	0.46967	-1.7398	2
Sepn1	0.058892	0.96613	4	0.9176	-2.6029	0	0.25495	-0.91305	1	0.54122	-0.11791	2
Eftud2	0.058941	2.2003	1	0.69651	-5.604	0	0.24737	0.1852	1	0.35042	-0.43737	0
Col4a5	0.059085	0.73028	3	0.73755	-1.412	1	0.22418	-2.2751	3	0.29179	-0.36762	3
Fpr-rs3	0.05912	0.56059	4	0.90881	-1.4824	0	0.89044	-3.1242	0	0.30633	0.10217	3
Ercc1	0.059126	0.73114	3	0.23936	-0.88573	1	0.74434	-7.7719	0	0.49646	-2.1082	1
Fkbp9	0.05925	-1.2808	2	0.12783	0.70686	4	0.26202	-2.498	3	0.37765	-1.2351	3
Fam163a	0.059254	1.7651	2	0.2788	0.028263	1	0.71578	-7.4089	0	0.30373	-1.9117	1
Nradd	0.05928	0.31226	2	0.61295	-0.48906	1	0.9757	-5.7957	0	0.052256	-0.27012	2
Erbb2	0.059308	0.43229	4	0.30917	-0.031111	3	0.043044	0.71591	3	0.73682	-0.62943	1
Slc44a3	0.059341	1.0886	3	0.86754	-2.3944	0	0.55224	-1.3525	1	0.067966	-0.72935	1
Nos1	0.059389	0.91188	3	0.36697	-0.0056387	2	0.038249	0.69614	4	0.78609	-1.2344	1
4933427G17Rik	0.05948	0.90551	3	0.87399	-1.3683	0	0.89185	-7.433	0	0.11466	0.77298	3
Ly86	0.059528	1.2128	3	0.34872	-2.6131	1	0.67861	-6.8819	1	0.69372	-4.9361	1
Col9a2	0.059544	0.69353	4	0.27091	-1.4795	2	0.78397	-3.2554	1	0.22426	-1.9788	1
Grhl3	0.059561	0.77185	4	0.478	-1.6804	2	0.84273	-5.3836	0	0.61821	-0.79992	2
Nkx2-2	0.059615	1.1622	2	0.66859	-4.4301	0	0.8506	-8.1316	0	0.56255	-2.673	0
Shisa9	0.059967	-2.3379	1	0.88308	-2.5526	0	0.52465	-6.2462	1	0.93206	-2.4213	0
Rnaseh2a	0.059982	1.3194	3	0.81787	-1.435	1	0.29574	-2.425	2	0.79563	-4.6029	1
Myc	0.060101	0.63967	4	0.79097	-0.9306	1	0.42903	-0.98257	2	0.46045	-0.5157	2
Nkx1-1	0.060112	-3.205	2	0.3072	-0.96201	2	0.22348	0.089207	3	0.66299	-1.155	2
Hnf1b	0.060135	0.93293	4	0.14518	0.012666	2	0.4631	-1.8115	1	0.99169	-7.2225	0
Cyp2j5	0.060274	-2.8424	1	0.68918	-0.9839	1	0.50292	-5.2117	1	0.65489	-1.3101	1
CTRLHS_57608	0.060278	1.5752	1	0.52038	-0.7569	0	0.98013	-5.9996	0	0.95301	-2.3962	0
S100a6	0.06054	0.57804	4	0.61022	-0.38635	2	0.63423	-4.551	1	0.94367	-0.97682	0
Llph	0.060551	-0.15895	2	0.28973	-1.5063	2	0.38829	-6.3099	2	0.64196	-1.5106	2
Lrrc4c	0.060609	0.92687	3	0.9778	-3.901	0	0.45492	-3.4248	2	0.17233	-0.83464	2
Ube2h	0.06062	1.371	2	0.54162	0.1023	1	0.95541	-7.8285	0	0.9896	-2.8235	0
Spg21	0.060676	0.18305	3	0.32697	0.18988	3	0.017698	1.8327	3	0.30343	-1.3872	1
CTRLHS_57997	0.060769	1.6847	1	0.28503	0.23969	1	0.95247	-8.7632	0	0.97808	-6.1753	0
Gzme	0.060893	-0.10284	2	0.19294	-0.8216	2	0.53082	-0.64846	2	0.64034	-4.3565	1
Clec4n	0.060907	-1.4654	1	0.091234	0.47632	4	0.28607	-7.4393	2	0.24005	-1.5447	1
Cdv3	0.060979	1.2887	2	0.87348	-1.9343	0	0.48003	-7.0361	1	0.12884	0.74134	2
Wrb	0.061066	1.5795	2	0.57895	-3.5097	1	0.90565	-6.9077	0	0.037804	-4.4122	2
Nfya	0.061092	-0.11633	2	0.87054	-5.1638	0	0.73268	-4.4141	0	0.38524	-1.2706	1
Dub1	0.061105	-0.061035	3	0.25528	-0.22181	2	0.77993	-4.2052	1	0.052073	0.6207	4
S100a3	0.061207	0.41239	2	0.82416	-2.7588	0	0.18439	-3.132	2	0.39096	-0.059301	2
Tpp2	0.061229	0.1388	2	0.48135	-3.9948	1	0.33533	-4.4371	2	0.87605	-1.2799	0
Foxc2	0.061368	0.31287	2	0.10523	-1.1833	1	0.83518	-7.8115	0	0.11357	-1.8158	2
Apoo	0.061379	-1.7519	1	0.99687	-7.0804	0	0.053664	-4.6787	1	0.50896	-3.9344	1
Nup188	0.061455	1.1693	3	0.81312	-1.5926	1	0.37833	-4.787	2	0.78324	-2.065	1
Vmn1r199	0.061471	0.14651	2	0.45701	-0.13376	1	0.48443	-6.6063	1	0.38572	-0.037264	2
Cpxcr1	0.061535	-0.28275	3	0.1352	0.43136	4	0.41504	-3.0349	2	0.52519	-0.90072	2
Arhgef37	0.06154	0.6919	4	0.94081	-1.7344	0	0.38402	-1.8121	2	0.30655	-0.73098	2
Melk	0.061594	0.37694	3	0.75042	-1.3356	1	0.017319	1.6107	4	0.35399	-1.0588	2
Edaradd	0.061677	-2.2121	1	0.88636	-6.3631	0	0.16347	-6.5442	2	0.41334	-4.6695	2
Tmem68	0.061723	-0.92002	2	0.4837	-2.3159	1	0.84759	-3.0795	0	0.78744	-1.3161	1
Grhl1	0.061817	-2.6216	3	0.46111	-1.4322	1	0.16803	0.10085	3	0.21994	-5.0138	2
Neurl1a	0.061842	0.6648	3	0.35659	-0.3474	2	0.015209	0.7693	3	0.67802	-0.74043	1
Coro1a	0.061901	-6.6848	1	0.42542	-3.2959	1	0.44469	-3.4835	1	0.24735	0.45651	2
Ppap2c	0.061909	-0.63081	3	0.28665	-1.1977	2	0.76717	-5.1113	1	0.017473	1.1297	5
Nfkb2	0.062046	-1.5838	2	0.06833	-1.8409	2	0.83735	-7.5242	0	0.61935	-1.7082	2
Mlph	0.062248	-0.77105	3	0.44237	-0.14568	2	0.53695	-6.3103	1	0.1951	-3.8052	2
Aoc3	0.062291	-0.36876	3	0.94705	-4.6122	0	0.26434	-7.676	2	0.067041	0.08607	3
CTRLHS_57487	0.062291	1.6876	1	0.33074	0.016125	0	0.8389	-3.0237	0	0.96086	-4.3077	0
Speer4f	0.062353	1.22	3	0.8207	-1.7798	1	0.15658	0.63635	3	0.34056	-0.17732	2
Echdc3	0.062426	0.95215	1	0.52478	-3.74	0	0.046091	-5.3207	1	0.91091	-4.4882	0
Carf	0.062431	0.47752	3	0.042637	0.98181	4	0.41539	-7.4955	1	0.74582	-3.1303	1
Dpp3	0.062487	0.051779	2	0.046105	-0.66907	2	0.57753	-4.7193	1	0.41159	-2.1144	1
Pcdhb8	0.062794	0.66378	4	0.8384	-1.4724	1	0.26525	-1.5991	2	0.99824	-3.7203	0
Ap2m1	0.062848	1.6235	2	0.572	-0.658	1	0.31209	-0.19922	2	0.076283	0.44992	2
Syce1	0.062857	0.3204	3	0.69379	-1.0274	2	0.97478	-8.1219	0	0.71714	-3.3506	1
Psmf1	0.062957	0.58295	4	0.55872	-0.66012	2	0.72182	-3.4984	1	0.82997	-2.0385	1
Mmp2	0.062976	-0.25749	3	0.55839	-0.52083	1	0.071045	-1.2062	2	0.20972	0.11378	3
Rab40c	0.062997	0.66132	3	0.57229	-0.0017095	2	0.84771	-8.4131	0	0.92685	-1.1624	0
Aim1l	0.06307	0.68276	4	0.42266	-0.261	3	0.061852	0.63111	4	0.45145	-0.82914	2
CTRLHS_57419	0.063093	1.9929	1	0.73672	-3.8478	0	0.59295	-4.653	0	0.54841	-1.9699	0
Zcchc2	0.063148	0.34962	4	0.90376	-2.7217	0	0.16531	0.20487	3	0.28587	-0.30966	3
Padi6	0.063177	0.46312	4	0.24662	-0.91872	2	0.33966	-0.87083	2	0.20398	0.26873	3
Ribc2	0.06318	0.67022	4	0.92854	-3.2152	0	0.64446	-3.232	1	0.0016501	1.3685	6
Cylc2	0.063203	0.63443	3	0.22826	-0.56667	2	0.56695	-1.8324	2	0.55834	-0.95191	2
Prkacb	0.063236	-0.24682	2	0.023726	0.66435	4	0.31879	-0.021676	2	0.13531	0.53486	3
Lin28a	0.063317	0.50042	4	0.17456	-1.4551	2	0.83973	-2.0961	0	0.90051	-5.1096	0
Rassf1	0.063379	0.87079	3	0.25146	-4.1127	1	0.51084	-3.3486	1	0.5054	-1.2167	2
Accs	0.063443	0.50883	4	0.8012	-0.61068	1	0.939	-5.4	0	0.96418	-6.5249	0
E430018J23Rik	0.063461	-7.3074	2	0.39755	-1.0707	1	0.095735	-3.2097	1	0.90939	-5.9012	0
CTRLMM_66659	0.063507	1.8799	1	0.82781	-3.9063	0	0.63985	-3.4926	0	0.18776	0.77674	1
Zfp957	0.063622	-0.72314	2	0.33263	0.15695	3	0.46041	-4.014	1	0.88417	-4.5464	0
Ccdc22	0.063635	1.2247	3	0.46883	-1.3169	2	0.48562	-3.4746	2	0.38227	-0.19095	3
Srpx	0.06369	0.51597	4	0.61335	-0.86445	2	0.93809	-7.4939	0	0.1064	1.0371	3
Pde8a	0.063692	-0.49945	3	0.55406	-1.3957	1	0.71997	-4.8931	1	0.28545	-0.48162	3
Sox18	0.063791	1.0197	3	0.81997	-3.6172	1	0.92895	-7.5016	0	0.52684	-2.198	2
Ids	0.063807	0.713	4	0.87619	-0.57439	1	0.99925	-6.861	0	0.46906	-0.72557	2
Cbln4	0.063876	0.57155	4	0.41578	-0.67635	2	0.35839	-4.6399	1	0.64545	-0.36846	2
Pmf1	0.063931	-0.12836	2	0.019307	1.5973	3	0.093458	0.90881	3	0.44956	-3.8935	1
Lce3a	0.064053	1.8252	2	0.17298	-0.97617	1	0.75473	-7.2358	0	0.84841	-2.5366	0
Dnmt3a	0.064079	0.38022	4	0.64036	-0.63155	2	0.43811	-0.90612	2	0.83986	-2.6393	1
Actl6b	0.064109	0.80774	4	0.75761	-1.3674	1	0.66074	-4.9113	1	0.34238	0.18519	3
Tmem90b	0.064176	-0.23803	1	0.5435	-2.437	2	0.98241	-8.4596	0	0.90584	-0.62237	0
Slc30a6	0.064185	-2.812	2	0.99648	-3.6622	0	0.56078	-4.5916	2	0.92744	-1.7679	0
Evi5l	0.064305	0.81491	4	0.86191	-3.5357	1	0.25356	-1.8103	2	0.17072	-0.082549	3
Esrra	0.064419	0.95976	3	0.87669	-3.5334	0	0.068323	-3.1291	2	0.77031	-3.251	0
Klc1	0.064514	0.33607	4	0.75559	-1.5221	1	0.69479	-7.8141	1	0.71894	-2.2233	1
Rdh9	0.064551	0.23941	3	0.10305	0.34285	4	0.70136	-4.2074	1	0.16878	-5.4093	1
Abcc3	0.064699	-2.2427	2	0.65474	-3.271	1	0.57216	-1.8482	1	0.16803	0.13837	3
Elk3	0.06476	0.5311	3	0.4981	-1.2321	2	0.71493	-2.3461	1	0.021193	0.90692	5
Pilrb2	0.064793	-0.41366	2	0.63208	-2.523	2	0.048119	0.24873	3	0.85043	-3.8066	1
Fam83h	0.064948	-0.42954	1	0.44914	-2.0044	2	0.94613	-7.4228	0	0.98961	-4.7515	0
Fam40a	0.065004	1.307	3	0.19159	-0.15244	2	0.47876	-1.946	2	0.673	-2.8184	1
Nrk	0.065011	1.0304	4	0.55616	-1.5273	1	0.27016	-3.5665	2	0.67409	-0.30094	2
Fyco1	0.065025	-0.060028	3	0.71723	-0.89501	2	0.70692	-2.8663	1	0.5738	-0.64467	2
Slc25a37	0.06512	0.95002	3	0.76523	-1.9625	1	0.69286	-2.7555	0	0.3878	-1.8187	1
Mrvi1	0.065293	1.1223	3	0.85126	-1.0866	0	0.21982	-2.6002	1	0.95765	-2.0926	0
Ccdc162	0.065471	0.21615	4	0.4584	-0.51369	1	0.54765	-4.6265	2	0.47752	-0.067734	2
Pigr	0.065493	-2.7232	2	0.17096	0.49676	3	0.51603	-2.2684	2	0.81147	-1.9006	1
Abhd16b	0.065594	1.4802	2	0.16878	0.85283	2	0.41027	-5.498	1	0.37503	-1.0515	1
5730403B10Rik	0.065608	-0.97653	1	0.63031	-0.36149	2	0.90664	-4.5683	0	0.47731	-3.6668	1
Plch2	0.06566	0.7717	3	0.73474	-4.6149	1	0.44959	-1.0196	2	0.79913	-2.2147	1
Dmrta2	0.065705	0.60127	4	0.6607	-1.6726	1	0.37587	-3.1237	2	0.8827	-3.0169	0
Cherp	0.065714	0.9078	2	0.23192	0.74662	2	0.033296	-4.9608	1	0.42438	-7.1263	1
Cckbr	0.065716	0.71956	4	0.84259	-1.5165	1	0.20514	-0.56915	3	0.017205	0.94239	4
Kremen2	0.065728	1.4495	2	0.13385	0.12475	1	0.95306	-8.254	0	0.73866	-1.7217	0
Fubp1	0.065755	0.19317	3	0.058135	0.68026	4	0.030381	1.0306	4	0.026363	0.82487	4
Nudt8	0.065769	-3.83	1	0.83936	-1.8907	1	0.12931	-3.0373	2	0.67478	-1.2278	1
Btbd6	0.065781	0.32143	3	0.38063	-2.2107	2	0.68377	-1.8501	1	0.96668	-2.1836	0
Ccdc6	0.065828	1.062	3	0.35631	-0.30551	2	0.92182	-7.9046	0	0.39081	-1.8233	1
Snx11	0.065956	0.71071	4	0.032056	-0.17906	3	0.91153	-6.4435	0	0.42474	-4.323	1
Naa11	0.066004	1.2449	3	0.089773	-1.0567	2	0.71018	-5.6922	1	0.55916	-0.65634	2
4932425I24Rik	0.066062	1.1201	3	0.4822	-1.2561	2	0.62394	-7.5649	1	0.071159	1.1725	3
Sod1	0.066086	-1.0386	1	0.016068	1.1104	4	0.25242	-5.1628	1	0.7497	-6.7048	1
Gja10	0.066128	0.87593	4	0.2315	-2.6434	2	0.52919	-5.231	2	0.35758	-1.5661	3
Stk38	0.066192	0.36326	4	0.28512	-0.50799	2	0.36336	-5.8697	2	0.80298	-1.9154	1
Agrn	0.066215	1.2375	3	0.19438	0.66678	3	0.9865	-7.7224	0	0.094933	0.92565	3
Gmds	0.066245	0.5452	4	0.18576	-1.1993	1	0.055809	0.84527	4	0.18235	-1.1374	2
Adcy10	0.066306	0.05812	3	0.016141	0.6794	5	0.39861	-2.8237	2	0.46844	-2.2147	2
Plaur	0.066353	-0.76422	3	0.77764	-0.85083	1	0.74889	-2.1734	1	0.48876	-1.7989	1
Actg2	0.066373	-0.20407	2	0.22829	0.46945	3	0.66519	-7.2735	1	0.81587	-3.4095	0
Chaf1a	0.066383	0.47213	1	0.61798	-3.6379	0	0.16934	-0.96697	2	0.67668	-3.6545	1
Slc1a4	0.066397	0.83241	3	0.62035	-2.6627	1	0.40726	-1.5307	1	0.71416	-1.2638	1
CTRLMM_67382	0.066454	2.0194	1	0.46542	-1.0718	0	0.55932	-7.5923	0	0.0082646	3.1501	1
CTRLHS_57587	0.066475	1.7041	1	0.40232	-0.37484	0	0.24178	0.19426	1	0.45335	-0.86173	0
Gpr128	0.066476	-0.4705	3	0.7784	-0.63246	1	0.52133	-5.0817	1	0.80891	-2.354	1
Mtor	0.066585	0.87407	3	0.003146	1.611	4	0.69444	-8.1207	1	0.30536	-0.086102	2
1700029F09Rik	0.066654	0.27877	3	0.85323	-1.4656	1	0.27042	-0.61867	3	0.13551	-0.14549	2
CTRLMM_66931	0.0667	1.8664	1	0.39243	-0.38082	0	0.7241	-8.0229	0	0.39405	-0.65007	0
Ddx17	0.066861	-1.3942	2	0.87879	-1.8414	0	0.49166	-7.4597	1	0.26562	-4.0011	2
Trim66	0.066862	-0.6023	2	0.22569	-1.0786	2	0.83031	-7.314	0	0.22151	-0.49809	3
Tph1	0.066875	1.4108	2	0.45233	-0.49848	1	0.31187	-3.1003	1	0.62021	-2.0247	1
Ppp2r5a	0.066948	0.49288	4	0.99807	-5.0561	0	0.021475	1.9818	3	0.39421	0.15758	2
Eif2c4	0.066956	0.040538	3	0.76949	-1.7764	1	0.86544	-7.6646	0	0.99592	-4.3227	0
Defb22	0.066966	-7.085	2	0.89961	-4.4604	0	0.48109	0.026369	2	0.72986	-2.1299	1
Ankrd36	0.066991	0.41443	3	0.53738	-1.3529	2	0.12013	-4.5798	1	0.21918	-1.3276	2
Pars2	0.067135	0.4831	3	0.85023	-0.80143	1	0.29099	-0.67335	3	0.28593	0.11384	3
B3gat3	0.06717	0.69214	4	0.11922	0.42886	3	0.7583	-2.4739	1	0.46912	-1.2507	2
Nbeal2	0.067217	1.1642	3	0.22409	0.0068149	2	0.56139	-7.7851	1	0.2838	-0.80997	1
Endod1	0.067218	0.41619	4	0.1097	0.69411	3	0.85175	-1.6335	0	0.13366	-0.13604	2
Impact	0.067318	0.26819	4	0.87708	-2.0186	0	0.52022	-6.313	1	0.76034	-1.2589	1
Cyp27a1	0.067357	0.54223	4	0.098984	-0.24171	2	0.21549	-1.7452	2	0.9298	-4.7217	0
Gars	0.067421	-0.68542	1	0.74635	-4.6462	0	0.00099861	2.2689	2	0.3504	0.051088	1
CTRLHS_57885	0.067488	1.5224	1	0.43366	-0.44043	0	0.31768	-0.60502	0	0.21127	0.46392	1
Lgals4	0.067519	0.76084	3	0.47653	-1.443	1	0.011865	1.8716	3	0.32271	-3.0941	1
Tldc2	0.067526	0.63336	4	0.69732	-0.25745	2	0.83747	-7.3506	0	0.25793	-0.97724	3
Kcnv1	0.067538	0.71689	4	0.34073	-2.6674	2	0.36343	-1.3329	2	0.14075	0.098537	3
CTRLMM_67390	0.067643	1.7698	1	0.80503	-2.8094	0	0.33915	-1.1069	0	0.033696	2.2175	1
Rbp7	0.067719	-2.1441	2	0.93238	-1.4997	0	0.54321	-3.653	1	0.2233	-0.13145	3
Osgin1	0.067791	-1.4201	1	0.1708	0.85123	3	0.19542	-1.0736	2	0.48196	-0.9295	1
Igsf11	0.067841	0.61108	4	0.90885	-0.98444	0	0.99684	-8.3372	0	0.37565	-2.7432	1
Ahi1	0.067868	-2.4997	2	0.84892	-2.0453	0	0.09354	-1.2482	1	0.97589	-4.9377	0
Apoa1	0.068059	0.44577	3	0.23113	-0.25699	2	0.72087	-1.603	1	0.64292	-1.2133	1
Gtpbp1	0.06806	-1.2236	2	0.88425	-2.2426	0	0.64983	-1.264	1	0.076854	0.97434	3
Myef2	0.068102	-2.2033	2	0.75929	-1.3571	1	0.95801	-7.765	0	0.73718	-1.0309	1
Asnsd1	0.068129	-0.28794	2	0.034509	1.1149	3	0.23851	-1.0064	2	0.95682	-3.0724	0
Cadm4	0.068376	0.34208	1	0.70628	-2.6438	0	0.68789	-5.0211	0	0.00031982	1.9073	1
Senp1	0.068396	0.12789	3	0.5864	-2.6926	2	0.3184	-1.8566	3	0.6812	-1.8031	1
Gmfb	0.068416	-0.56104	1	0.34721	-0.67433	1	0.7332	-4.1203	0	0.97993	-3.6309	0
Xrra1	0.068445	0.76944	4	0.41487	-1.0372	2	0.95695	-7.9664	0	0.68618	-2.1462	1
Entpd1	0.06845	-2.1574	2	0.98291	-5.0426	0	0.47069	-3.1359	2	0.86189	-2.2066	0
Glmn	0.06851	-1.8125	2	0.15996	0.2775	4	0.30908	-4.4207	1	0.21206	-0.78489	3
Pcdhb2	0.068517	-0.79432	1	0.19931	-0.70786	1	0.91602	-6.9013	0	0.56435	-2.9844	2
Glod4	0.06853	1.0115	3	0.035325	0.68957	3	0.19882	0.24715	3	0.63265	-1.3885	2
Adat2	0.068553	-6.7728	1	0.73028	-1.0451	1	0.54267	-7.1076	1	0.52426	-1.6278	1
Sema3b	0.068623	-0.24628	2	0.72045	-3.5962	1	0.16205	0.58746	3	0.22256	0.3513	3
Cldn14	0.068627	-0.3998	1	0.14231	-1.6671	2	0.6167	-3.5252	1	0.97315	-2.5526	0
Gm14124	0.068688	0.97282	3	0.15016	0.68317	3	0.51442	-8.4941	1	0.63012	-2.2117	1
Stt3b	0.068706	-0.14042	2	0.77969	-2.4569	1	0.51262	-1.6858	1	0.025788	-0.194	2
Asic1	0.068761	0.08806	3	0.83249	-0.28965	1	0.93957	-6.9758	0	0.047349	0.7568	4
Cmas	0.068947	0.68648	4	0.72867	-0.55021	2	0.61033	-2.8978	1	0.12408	0.3278	4
Zfp180	0.068963	0.51708	4	0.65107	-3.2917	2	0.56196	-0.62919	2	0.69896	-0.071383	1
Optc	0.068989	0.76134	4	0.98062	-2.0769	0	0.63617	-6.4834	1	0.091361	-1.624	1
Itgb8	0.069039	0.77629	4	0.28081	-1.3003	2	0.28813	-3.0721	2	0.17421	-0.62294	2
Junb	0.069101	1.1104	3	0.035478	-4.0154	1	0.78173	-6.9314	1	0.5127	-2.5354	2
4921511H03Rik	0.069301	-1.7168	3	0.5333	-3.0532	2	0.95681	-7.1283	0	0.10564	0.39233	4
Plcxd1	0.069359	-0.88371	2	0.14509	-0.34505	2	0.47294	-4.556	1	0.19467	0.45448	3
Ror2	0.069359	0.59141	4	0.77454	-1.5319	1	0.13815	-0.083523	3	0.4092	-0.25968	2
Crygn	0.069426	0.64659	4	0.13721	0.60678	3	0.59919	-8.1143	1	0.47484	-0.68451	2
Hspbap1	0.069476	-3.4731	2	0.48206	-1.9976	2	0.97311	-6.4619	0	0.76454	-1.7135	1
Kdelr3	0.069478	-0.86593	1	0.23852	-1.453	2	0.48863	-3.962	2	0.11207	-0.94659	3
Vgf	0.069617	-0.58186	2	0.74481	-1.2657	1	0.043504	-1.1157	2	0.065388	0.31165	3
Lin37	0.06966	-2.1464	1	0.86702	-7.1955	0	0.83318	-7.5273	0	0.63865	-0.070051	0
CTRLHS_57347	0.069794	1.776	1	0.78793	-2.9218	0	0.7872	-8.1754	0	0.41665	-0.75972	0
Prl3d2	0.069811	1.125	3	0.99122	-4.2234	0	0.11218	-3.8072	2	0.37208	-3.0525	2
Iyd	0.069888	0.59443	4	0.26421	-0.86973	3	0.54827	-4.4713	1	0.48706	-0.64934	2
Aqr	0.069923	1.8135	1	0.13989	1.1885	1	0.30357	-0.71135	0	0.84045	-5.4713	0
Rlbp1	0.069953	-0.22525	2	0.64995	-1.9798	1	0.96467	-8.099	0	0.24097	-1.6445	1
CTRLHS_57498	0.07016	1.6906	1	0.66882	-1.7229	0	0.68931	-2.744	0	0.31616	-0.095299	0
Nek3	0.070172	0.22829	4	0.7147	-2.9239	1	0.25875	-5.3841	1	0.54442	0.0066773	2
Ctag2	0.070174	-2.4002	2	0.52992	-0.31356	1	0.17771	-3.8452	2	0.50449	-0.47628	1
Pinlyp	0.070255	0.22355	4	0.69854	-2.834	1	0.45418	-4.692	2	0.81053	-1.6371	1
Cyp39a1	0.070312	-0.48543	3	0.085666	0.40099	3	0.030808	-0.012972	3	0.51743	-0.35004	2
Rpap2	0.070377	1.3298	2	0.83147	-4.5445	0	0.40213	-6.9795	1	0.86059	-6.7895	0
Brip1	0.070447	-0.35786	3	0.49126	-0.28384	2	0.20897	-5.2128	2	0.59731	-5.1713	2
Ankra2	0.070473	0.51166	4	0.44573	-0.018925	3	0.13118	0.28667	3	0.46857	-1.9769	2
Slc35b2	0.07049	-0.19161	2	0.29363	0.21722	3	0.45281	-0.1549	2	0.68189	-0.78229	1
Xpa	0.070609	-2.6329	3	0.015341	1.4978	5	0.12375	-1.2929	2	0.55308	-2.5714	2
Pla2g4a	0.070734	-1.1185	1	0.20189	0.48594	3	0.19819	0.22297	3	0.50998	-1.8961	2
Dpf1	0.070735	0.73664	4	0.9912	-1.5759	0	0.19359	-0.021076	3	0.21441	-1.3189	2
Hras1	0.07074	0.58167	4	0.69033	-0.569	2	0.86179	-3.0036	0	0.84566	-1.1103	1
Zfp282	0.07098	0.30631	3	0.68373	-1.3129	2	0.87375	-4.0749	0	0.10968	-1.0697	2
Stpg1	0.07102	-1.3382	1	0.71978	-3.3355	1	0.069659	1.2253	3	0.075115	-3.3875	1
9130401M01Rik	0.071096	0.71303	4	0.40176	0.14654	3	0.8374	-3.9578	0	0.37769	-0.92241	2
CTRLHS_57046	0.071113	1.9549	1	0.13509	1.3442	1	0.5645	-7.6079	0	0.010243	3.0569	1
Slfn2	0.071283	0.78466	4	0.0048651	1.5449	4	0.24326	-0.84978	3	0.79324	-2.3495	1
Anln	0.071353	-2.1734	1	0.033439	-0.92898	1	0.89153	-7.9033	0	0.76292	-2.2935	1
Slc25a27	0.071373	0.64351	3	0.6972	-0.88251	2	0.93996	-6.5817	0	0.57798	-2.2828	1
4930451C15Rik	0.071389	0.65721	4	0.97894	-5.7905	0	0.49105	-6.4228	1	0.65648	-1.5416	1
2300003K06Rik	0.071404	-0.6282	1	0.41292	-3.9802	1	0.55726	-5.1461	2	0.98843	-4.6363	0
Gtf2h1	0.071407	1.5585	2	0.89553	-3.7749	0	0.009677	-2.1892	2	0.59031	-4.046	1
Atp6ap1l	0.071468	0.71835	3	0.82137	-3.6226	0	0.5907	-1.2496	1	0.13798	-5.6309	2
Dynlt3	0.071507	-1.0592	2	0.25605	0.24328	3	0.9066	-7.8085	0	0.8835	-1.4702	0
Usp35	0.071523	0.89732	3	0.3841	-0.68481	2	0.14708	0.57001	3	0.14408	-0.085168	2
Trim25	0.071571	-0.076587	3	0.76507	-1.3727	1	0.8742	-3.7465	0	0.88211	-3.2986	0
Gmppb	0.071576	1.3045	2	0.65368	-2.644	0	0.40159	-0.58963	1	0.85239	-4.2841	0
CTRLMM_66524	0.07162	1.6655	1	0.26336	0.38697	1	0.21395	0.53726	1	0.87504	-3.2771	0
Ltb4r1	0.07163	0.51242	4	0.24557	-0.18654	3	0.90614	-2.3188	0	0.63148	-1.9763	1
Lyn	0.071705	0.42458	3	0.56794	-0.32028	2	0.03101	-0.04419	3	0.36753	-0.91703	3
Gpbp1l1	0.07182	0.63439	4	0.3073	-0.70498	2	0.54747	-1.2139	2	0.034529	0.57929	3
Cacng8	0.071919	0.80907	4	0.44236	0.040436	3	0.98142	-4.6725	0	0.23071	-1.5552	3
Brd4	0.071926	1.5687	2	0.28631	-3.409	1	0.22281	0.40138	2	0.12022	-3.8094	1
Unc13c	0.071941	0.27408	2	0.72354	-0.62661	1	0.52019	-7.4508	1	0.24613	-4.4721	1
Notch3	0.07206	0.14352	3	0.97201	-1.3546	0	0.32445	-4.7417	1	0.26739	-1.2129	1
BC096441	0.072062	-0.37172	2	0.3714	0.0088915	2	0.83475	-4.6639	0	0.21578	-3.071	2
Krt18	0.072114	-1.0674	2	0.98315	-2.6273	0	0.29268	-2.8974	1	0.61714	-2.2235	1
Nuf2	0.072167	1.3384	1	0.40073	0.35149	1	0.034306	2.2188	2	0.14828	-0.21784	1
Itih1	0.072301	1.1015	3	0.65748	-0.72394	1	0.016896	-2.0635	1	0.80324	-2.5786	1
Ces4a	0.072323	-1.7881	2	0.3061	-2.3465	2	0.75202	-7.5158	1	0.94225	-1.974	0
Nxph1	0.072408	0.3505	3	0.41746	0.016371	3	0.74589	-7.7409	1	0.58756	-0.86026	2
B9d2	0.072478	-0.75703	2	0.13253	0.4575	4	0.46209	-0.59306	2	0.99343	-4.1318	0
Ros1	0.072588	0.54021	4	0.74789	-1.8782	1	0.12757	0.40998	3	0.59511	-1.0218	2
Oasl1	0.07281	1.2919	3	0.016209	-1.6089	2	0.56111	-7.0045	1	0.57411	-1.0017	1
CTRLHS_57697	0.072846	1.5313	1	0.16086	0.87582	1	0.23591	0.24476	1	0.9838	-8.7947	0
Mrpl41	0.072863	-1.4174	1	0.3285	-2.8321	1	0.55412	-7.1271	1	0.12975	0.88351	3
Skiv2l2	0.072987	-1.4425	1	0.73086	-2.9502	0	0.73858	-7.4323	0	0.02465	-2.0282	1
Mtap7d2	0.073182	0.066084	3	0.37719	-0.75839	3	0.055286	0.81402	4	0.29954	-0.086166	3
Ash1l	0.073216	0.19419	2	0.69704	-0.91831	1	0.64182	-4.5293	1	0.93665	-2.7443	0
Spink2	0.073418	0.026719	2	0.14698	-0.46178	2	0.8426	-7.0069	0	0.18584	-2.9643	2
Lrrc4	0.073438	-6.5906	2	0.25182	-1.0266	2	0.82062	-7.9174	0	0.99526	-2.9996	0
Madcam1	0.07347	0.67022	4	0.73169	-1.8427	2	0.58684	-4.5733	2	0.23895	-3.2845	1
Igsf3	0.073488	-0.81853	2	0.91891	-1.3139	0	0.66274	-1.7157	1	0.4135	-5.017	1
Unc93a	0.07356	-0.3941	1	0.10054	-1.9081	1	0.23338	-1.1623	1	0.37788	0.11086	1
Gm166	0.073582	-0.69352	2	0.18425	0.092458	2	0.93393	-6.2683	0	0.65176	-3.1602	2
Eral1	0.07371	0.69252	3	0.77672	-2.6558	0	0.42715	-5.5233	1	0.43058	-0.40468	2
Rab28	0.07379	-0.13487	3	0.044584	0.084806	2	0.95155	-7.2146	0	0.16235	-0.053713	1
Klk1b16	0.073833	-1.9604	2	0.05786	-1.831	2	0.74908	-8.2576	1	0.4342	-0.049514	2
Ifng	0.073849	-1.13	1	0.42763	-0.16778	2	0.94271	-8.0738	0	0.091157	-1.6072	2
Mbd3	0.073896	0.71477	2	0.34074	-0.86656	2	0.70654	-4.6442	0	0.93803	-3.9189	0
Tmem200c	0.07396	0.70717	4	0.56921	-1.9241	1	0.99201	-7.7029	0	0.17307	-4.4854	2
Bex6	0.073963	-2.4464	1	0.06131	1.0228	3	0.82851	-7.7541	0	0.56176	-0.2565	1
Cyld	0.073967	-0.25885	3	0.56701	-1.8882	2	0.10044	0.16354	3	0.10784	-0.45651	3
Kctd11	0.073982	-4.5933	2	0.59198	-2.9547	2	0.39599	-7.5059	1	0.77214	-0.2924	1
Mcmbp	0.074054	1.1591	1	0.82359	-4.4717	0	0.59649	-1.7937	1	0.7431	-3.6087	0
Pcnxl2	0.074103	-1.6998	2	0.42383	-3.0304	2	0.8329	-8.0592	0	0.9037	-3.7299	0
Smarcd3	0.074172	0.032154	3	0.50586	-0.74586	1	0.46821	-4.4399	2	0.58466	-1.1764	2
Vmn1r22	0.074257	0.11162	1	0.5325	-0.22859	1	0.65665	-0.99607	0	0.73542	-0.88145	0
Pcyox1l	0.074281	-1.9663	2	0.88239	-3.4022	0	0.73534	-7.509	1	0.98248	-2.21	0
Comp	0.074301	0.8586	3	0.066618	-0.19027	2	0.99536	-7.9017	0	0.44244	-0.53053	2
Gpr113	0.074346	-1.5604	2	0.4305	-0.62831	1	0.62294	-4.8555	1	0.097321	0.011994	3
Med26	0.074395	1.0779	3	0.14626	0.66811	3	0.61125	-6.8506	1	0.75736	-2.6858	1
D8Ertd82e	0.07453	-2.8969	1	0.71193	-1.0036	1	0.77679	-2.6219	0	0.66719	-2.1455	1
Aff1	0.074615	0.082081	3	0.26773	0.25743	3	0.70776	-4.5846	1	0.17426	-1.285	2
CTRLHS_57672	0.074687	2.0912	1	0.57511	-3.5502	0	0.43083	-7.1087	0	0.12436	1.572	1
Vcan	0.074692	-3.3009	2	0.4092	-0.94251	2	0.7824	-4.8458	1	0.84678	-4.743	1
Atxn7l2	0.074698	0.80086	4	0.3901	0.15309	3	0.085752	-3.1132	3	0.98687	-3.1845	0
Tbpl1	0.074726	-2.7494	1	0.93531	-2.5877	0	0.12888	-5.2188	1	0.70987	-0.12022	1
Coq4	0.074776	1.1497	3	0.35695	0.053686	2	0.80909	-2.6688	0	0.59089	-0.14194	1
Lypd3	0.074784	-1.494	2	0.40899	-1.0865	1	0.92196	-7.488	0	0.94611	-4.9053	0
Gbp4	0.074928	-0.8268	2	0.88872	-0.4859	0	0.83815	-2.5265	0	0.51301	-0.71485	1
Grpel1	0.074982	2.0785	1	0.64172	-6.8036	0	0.60073	-6.9521	0	0.76137	-5.644	0
Pkd2l1	0.075029	-2.9169	2	0.19114	0.59597	3	0.67071	-7.1056	1	0.59219	-0.71101	1
Snx17	0.07503	-1.7999	1	0.15844	0.43507	3	0.75485	-5.8131	1	0.41401	-1.4159	2
Mmp25	0.075037	0.83939	3	0.097811	0.23029	2	0.9113	-5.5012	0	0.82048	-0.081692	0
Fbxl4	0.075059	0.34675	3	0.57105	-0.33597	2	0.57281	-0.2761	2	0.98234	-1.5754	0
LOC100038947	0.075082	0.70265	3	0.75473	-2.4268	1	0.29274	-3.5533	3	0.070855	0.28039	3
Tmem151b	0.075115	-1.4098	1	0.0044266	1.237	3	0.62496	-1.6848	1	0.51774	-4.0106	1
Fam129a	0.075157	-0.99003	2	0.45449	-1.3446	2	0.2396	-7.8273	1	0.7887	-1.7332	1
Gm10345	0.075439	0.84146	2	0.7193	-0.9728	1	0.42369	-2.7759	1	0.047431	0.96837	3
Pphln1	0.075444	0.7008	4	0.47222	-0.20892	3	0.18265	0.36442	3	0.68941	-1.1554	1
Mdm4	0.075582	-1.8744	2	0.46043	-2.0255	2	0.13248	-2.0304	1	0.61101	-3.0596	1
Zfp947	0.075611	0.31269	3	0.30771	-1.0912	3	0.38949	-4.6681	1	0.28195	-0.3266	3
CTRLHS_57944	0.075776	1.5833	1	0.41282	-0.42103	0	0.74255	-2.6881	0	0.11156	1.2548	1
Mageb4	0.075817	0.78248	4	0.36031	-1.8337	3	0.074262	0.57795	4	0.041042	0.74849	4
Ccdc87	0.07585	-1.006	2	0.47288	-2.2669	2	0.03998	1.633	4	0.1056	-0.85024	2
Ccdc115	0.075964	1.2543	2	0.31822	0.2221	2	0.29885	-1.8613	1	0.57516	-4.431	1
Catsper1	0.076016	0.037774	2	0.67949	-1.0144	1	0.91341	-5.147	0	0.34394	-0.518	3
Cngb3	0.076024	0.86034	4	0.15345	-0.17757	3	0.49666	-2.5082	2	0.93426	-3.5134	0
Il18rap	0.076058	0.20442	3	0.09234	0.68742	4	0.78117	-3.1835	0	0.7074	-0.86761	1
Wapal	0.076193	1.0967	3	0.85303	-1.3273	0	0.44821	-3.0455	1	0.18196	0.5035	3
Zfp706	0.076386	1.0532	3	0.54852	-1.5445	1	0.68015	-2.336	1	0.98016	-5.247	0
Tubgcp4	0.076387	-3.981	1	0.0062961	0.6745	2	0.73743	-3.0248	0	0.64431	-2.2206	1
Deptor	0.076424	0.20053	3	0.17267	0.2849	4	0.22344	-0.49697	3	0.40784	-1.858	1
Pdp1	0.076455	0.20686	3	0.24057	-1.2752	2	0.0099695	1.6297	4	0.17136	0.10073	3
Tmem206	0.076457	-1.6293	2	0.408	-1.1061	1	0.84381	-4.7589	0	0.89243	-1.9273	0
Ralgps2	0.076607	1.058	3	0.55739	-1.272	1	0.65551	-7.1896	1	0.68298	-1.6477	1
Rnf214	0.07663	-0.12424	2	0.47233	-0.092755	2	0.76201	-5.2412	0	0.87568	-5.7758	0
Vmn1r83	0.076683	-3.6055	1	0.21127	0.31057	2	0.13772	1.0343	2	0.91872	-2.2611	0
Ces2h	0.076795	1.0053	3	0.55309	-0.28649	2	0.95185	-4.9262	0	0.76871	-5.3142	1
Oxsr1	0.076864	-0.41463	1	0.36343	-2.0908	1	0.00062784	-5.0533	1	0.57077	-4.7448	1
Pcdhb3	0.076906	-2.1185	1	0.34665	-0.79139	3	0.49184	-1.6863	2	0.41069	-1.601	2
Obsl1	0.07696	0.18813	3	0.88989	-1.9248	0	0.96612	-7.8438	0	0.6467	-1.8415	1
Bpifb9a	0.076965	-1.7239	2	0.75248	-2.3616	1	0.39227	-5.531	1	0.73894	-0.97279	1
Rgma	0.077	0.89058	3	0.19326	0.45626	2	0.38926	-0.88534	2	0.45391	-2.9443	1
Gm1587	0.077003	0.88826	3	0.48788	-3.3397	1	0.28221	-0.1844	2	0.043716	-2.0423	2
Eif3k	0.077038	-2.3212	2	0.3523	-2.0805	2	0.94448	-7.1288	0	0.11804	0.4601	3
Mbnl1	0.077087	-4.4208	1	0.91821	-5.7091	0	0.76177	-2.2761	1	0.095818	-3.1324	2
Radil	0.077089	0.539	3	0.68289	-0.54525	2	0.88039	-6.4754	0	0.5217	-3.509	1
Gm3286	0.077092	2.0467	1	0.64731	-6.8267	0	0.15436	-2.1936	1	0.48047	-2.2052	0
Gp9	0.077105	0.44768	4	0.91418	-1.5185	0	0.40471	-4.8146	1	0.39186	-0.0021528	2
Ube4a	0.077193	0.20838	3	0.93217	-1.6372	0	0.97692	-5.6102	0	0.82403	-1.3693	1
Trmt12	0.077245	0.86585	3	0.51027	-3.2906	1	0.45975	-6.1797	1	0.14703	0.87554	3
Trpd52l3	0.077253	-1.4117	2	0.91142	-1.7148	0	0.62845	-4.8258	1	0.83563	-2.9395	1
Gm13308	0.077306	0.87458	2	0.68139	-0.92782	0	0.73774	-5.2084	0	0.11973	1.0252	1
Ccdc130	0.07746	0.40538	3	0.54539	-2.0731	2	0.87628	-7.2712	0	0.58643	-0.8557	1
Slc4a11	0.077464	-0.06973	2	0.96258	-2.5739	0	0.32348	-3.7502	2	0.90755	-4.8572	0
Umps	0.077482	1.4787	2	0.7993	-4.3008	0	0.027898	1.7607	2	0.036638	-2.8171	1
Fam186b	0.077547	-0.77791	2	0.40079	-0.34113	3	0.68252	-7.5107	1	0.54574	-1.3734	2
Spn	0.077573	-1.4932	1	0.21755	0.3438	3	0.33266	-0.79583	2	0.44374	-0.94258	2
Cmpk1	0.077593	-0.50812	3	0.1034	-0.13118	2	0.834	-5.2905	0	0.094842	-1.4022	2
Vmn2r55	0.077771	-2.5783	1	0.4119	-1.7842	1	0.26535	-1.709	3	0.045973	-2.4486	2
Snx22	0.077782	1.7881	2	0.79109	-4.1531	0	0.15791	-0.58376	1	0.29493	-1.2107	1
Iqcg	0.077802	-2.828	2	0.66005	-0.45645	1	0.71261	-4.1632	1	0.56263	-1.3445	1
Tnfaip3	0.077884	-0.21961	2	0.55926	-0.65795	1	0.77996	-7.357	0	0.14307	0.26945	3
Tmbim4	0.077926	-1.4618	2	0.25608	-0.13986	3	0.62071	-2.6685	1	0.13063	0.2801	4
4930503L19Rik	0.077951	-0.26189	3	0.27773	-1.6223	3	0.78227	-2.7092	1	0.60589	-0.78068	1
Krt81	0.077997	0.90686	3	0.41717	-2.2788	1	0.53099	-3.0331	1	0.76006	-0.60745	1
Fastkd2	0.07802	0.39513	4	0.14035	0.27673	3	0.43019	-3.9561	2	0.49718	-2.2127	2
Hnrnpll	0.078078	1.1937	3	0.66494	-4.6118	1	0.069677	1.6556	3	0.84421	-2.8328	0
Cxcl13	0.078097	-0.88529	1	0.0070096	0.0329	2	0.49798	-4.6574	2	0.18075	0.57743	3
Btc	0.078106	0.8039	4	0.72711	-1.4793	1	0.35962	-3.7528	1	0.86948	-4.2657	0
Thpo	0.078109	0.33859	4	0.69153	-4.1372	1	0.17342	-1.9868	2	0.80296	-5.0655	1
2810428I15Rik	0.078116	-0.1901	2	0.89715	-2.1307	0	0.96584	-7.9725	0	0.16479	-2.3044	1
Tnip3	0.078125	0.9097	3	0.10104	0.47707	4	0.6931	-8.6004	1	0.10009	0.79817	3
Atpaf2	0.0782	0.86664	3	0.17368	0.55114	3	0.4464	-2.0733	2	0.76335	-1.7688	1
Slc38a5	0.078249	0.94521	3	0.19295	0.45269	3	0.51166	-2.9469	1	0.29331	-1.143	2
Lmbrd2	0.078262	-2.0852	2	0.40539	-0.36739	2	0.6685	-4.336	1	0.29481	-3.9444	1
Lrrc73	0.078343	0.40774	3	0.44803	-2.1769	1	0.83028	-7.3883	0	0.42852	-2.5942	2
Trim34b	0.078471	-2.1926	1	0.41797	-1.2033	2	0.79589	-5.1521	1	0.18166	-1.1543	2
Zic1	0.078481	-0.58588	2	0.12084	-1.5102	2	0.33965	-7.0818	1	0.69178	-2.1122	1
Fam132b	0.078594	-1.3385	2	0.61897	-0.41738	2	0.95273	-8.0862	0	0.59581	-3.5196	1
Alg2	0.078601	1.9986	1	0.25863	0.57736	1	0.15928	1.4593	1	0.61424	-7.2171	0
Oaz1	0.078622	-0.68255	2	0.50379	-0.28405	1	0.84409	-4.7932	0	0.30383	-5.3279	2
CTRLMM_66861	0.078688	1.6823	1	0.8167	-3.2974	0	0.69814	-3.8279	0	0.48941	-1.2526	0
Zfp259	0.078701	-1.9756	2	0.092712	-0.36268	2	0.090915	1.1478	3	0.0086099	2.1026	3
D6Wsu116e	0.078732	0.89314	2	0.013707	1.1054	3	0.99355	-8.2562	0	0.91709	-2.7196	0
Rpl3l	0.078736	0.61617	4	0.66321	-0.9816	2	0.35287	-4.1439	1	0.78402	-1.508	1
Frmd5	0.078816	-0.67227	2	0.42039	-0.82106	2	0.31399	-1.4774	3	0.41317	-4.0347	1
Hrc	0.078873	0.35329	3	0.58118	0.041975	2	0.7863	-5.6974	0	0.7875	-2.2756	1
Plcxd3	0.07889	-0.8411	2	0.80697	-3.305	1	0.041687	0.66574	3	0.41841	-4.4134	2
Syt3	0.078896	-0.063362	2	0.95106	-2.5172	0	0.88956	-7.4675	0	0.37246	-1.1724	2
Mon2	0.078914	-0.9994	2	0.092294	1.0964	3	0.052963	-3.4534	1	0.98659	-7.0634	0
Slc25a4	0.078924	0.86849	3	0.2881	-1.0878	1	0.79524	-4.9034	0	0.27025	-2.5697	2
Ubxn11	0.078949	-1.1768	2	0.59763	-0.8344	1	0.34388	-6.7023	2	0.20516	-3.4021	2
Prrg3	0.078959	-1.3784	3	0.85152	-1.9762	1	0.27652	-3.8816	2	0.4931	-0.56513	2
1700003M02Rik	0.078998	0.23381	3	0.054077	0.8485	4	0.85857	-3.3241	0	0.22435	-0.64126	3
Vdac2	0.079194	-0.4606	2	0.027621	-0.02068	2	0.5309	-5.1134	1	0.46219	-1.0549	2
Map3k11	0.079291	-4.5776	1	0.67079	-1.907	1	0.41057	-3.4975	1	0.83212	-2.1364	0
Pnkd	0.079326	-0.28001	3	0.13934	-0.59081	2	0.33035	-7.6283	1	0.60403	-1.8036	2
Gria3	0.079513	0.86939	3	0.64117	-1.3146	1	0.86794	-5.3728	0	0.89678	-1.3263	0
Wdr33	0.079566	1.7863	1	0.56108	-1.7657	0	0.34759	-1.5351	0	0.30973	-0.0695	0
Zfp874b	0.079598	1.4376	2	0.65857	-2.8989	1	0.63548	-2.8135	0	0.71626	-1.2632	0
2310021P13Rik	0.07964	-4.5901	1	0.13808	0.30433	3	0.87161	-5.5848	0	0.66827	-2.9755	2
Izumo4	0.07965	0.50611	4	0.1993	-0.79448	2	0.78843	-7.3243	1	0.32535	0.13413	3
Plcd4	0.07969	1.0936	3	0.69177	-0.68844	1	0.33159	-4.818	2	0.75199	-3.6892	1
1700074P13Rik	0.079776	-0.29661	1	0.73975	-0.38501	0	0.24365	-6.6593	1	0.81147	-6.0288	0
Casp14	0.079777	0.60218	3	0.84825	-3.8313	0	0.213	-0.88747	3	0.96363	-6.2419	0
Zfp954	0.079781	-1.4463	1	0.50283	-2.2211	1	0.50684	-0.45382	1	0.90848	-6.9291	0
Kcnj2	0.079901	0.72401	3	0.21664	-0.96636	2	0.39674	-0.57876	2	0.85074	-0.93712	0
Ndufb10	0.079937	0.81275	2	0.7707	-4.2192	0	0.62804	-6.8725	1	0.26539	-0.15946	2
Comtd1	0.080061	-4.2246	1	0.2286	-1.5983	1	0.3227	-1.7342	2	0.070779	-2.1925	2
Ndufaf4	0.080064	0.88407	3	0.2218	-0.54413	1	0.82624	-1.1477	0	0.59778	-3.2571	1
Cthrc1	0.080113	-4.2844	1	0.27637	-0.20034	2	0.30066	-0.4287	2	0.53968	-4.0138	2
CTRLHS_57115	0.0802	1.4187	1	0.82953	-1.7555	0	0.075702	1.7649	1	0.20792	0.49371	1
Ndufa5	0.080222	0.020346	2	0.11023	-2.1754	1	0.19074	-4.9005	1	0.64032	-3.8885	1
Vps4a	0.080226	0.099377	2	0.50469	-0.34094	2	0.69673	-3.6481	1	0.88406	-4.8347	0
E2f1	0.08025	-0.25053	2	0.0010204	0.67128	5	0.44432	-0.22662	2	0.16153	0.37091	3
Vmn1r91	0.080258	0.7301	2	0.98988	-6.8089	0	0.1116	1.724	2	0.87727	-6.6901	0
Aspm	0.08026	0.13039	2	0.39463	-0.29855	1	0.21882	-2.1311	2	0.75236	-1.8459	0
Mtmr1	0.080267	0.35242	3	0.21884	0.41668	3	0.092438	0.87446	3	0.71413	-0.50271	1
Dtx2	0.080283	0.49704	4	0.14527	0.38382	4	0.27539	-0.097323	2	0.082475	0.37727	3
Nlgn1	0.080374	-0.57201	2	0.45041	-3.4558	2	0.046821	-3.2792	3	0.8728	-1.1817	0
Senp2	0.080431	0.064861	3	0.91612	-0.40327	0	0.61593	-1.7401	1	0.85937	-1.6304	1
CTRLHS_57613	0.080464	1.4622	1	0.94393	-2.8524	0	0.95742	-8.8015	0	0.45111	-0.74846	0
Tomm40l	0.080554	-1.393	2	0.28129	-0.81062	1	0.98407	-7.7626	0	0.33879	-2.2738	1
Prrc2b	0.080642	0.39136	3	0.53361	-3.3411	1	0.084462	1.4135	3	0.057226	0.46768	3
CTRLHS_57109	0.080644	1.5633	1	0.32575	0.045846	0	0.14655	1.2428	1	0.23231	0.41032	1
Asb18	0.080659	0.20062	3	0.71931	-0.31961	2	0.046564	1.16	4	0.92093	-3.1983	0
Mapk1	0.080782	0.39165	4	0.014102	0.78052	5	0.1474	0.51553	3	0.62924	-0.56287	2
Lama4	0.080783	0.45241	3	0.71918	-1.7802	1	0.055052	1.396	3	0.26996	-0.50556	2
Mterfd2	0.08085	-0.44421	2	0.14017	0.63139	3	0.42937	-7.7583	2	0.49551	0.065887	2
Nfkbie	0.080865	0.70989	3	0.43586	-2.2376	2	0.43611	-5.043	1	0.8724	-1.0823	0
Hn1	0.080971	0.73455	3	0.49363	-2.7519	1	0.73417	-6.8698	1	0.97751	-5.7842	0
Unc5c	0.080973	0.51139	3	0.90972	-1.5001	0	0.11647	-1.129	3	0.15247	-0.79987	1
Tulp3	0.080984	-1.9457	1	0.2944	0.25791	3	0.76757	-4.8177	1	0.044592	0.08203	3
Ric3	0.081007	-0.75507	3	0.89772	-1.9572	0	0.419	-7.898	2	0.4714	-0.44853	2
Dtnb	0.081013	0.11213	3	0.50453	-0.55544	2	0.98802	-6.714	0	0.68342	-1.3418	1
Ccdc42b	0.081186	1.0418	3	0.32857	-2.3326	2	0.47168	-7.8775	1	0.20873	-2.7957	1
D14Abb1e	0.081409	0.89023	3	0.82712	-1.0659	1	0.9421	-3.4959	0	0.5656	-1.5721	1
Usp24	0.081431	0.82361	3	0.16723	0.5175	3	0.25724	-0.094916	2	0.60237	-3.8054	1
Olfm3	0.081457	1.0849	3	0.32073	0.15559	2	0.36462	-2.671	2	0.13785	0.6142	3
Gjb1	0.081547	-2.6217	1	0.74439	-0.51153	1	0.36766	-7.7647	1	0.15878	-2.5454	2
Otub1	0.081601	0.99619	3	0.20476	0.75196	3	0.41258	-3.2	1	0.98436	-3.7956	0
Ppp1r12c	0.081665	1.4755	2	0.61314	-1.5693	0	0.41503	-3.1915	1	0.47145	-4.255	1
Fam166a	0.081824	-2.4071	2	0.14604	-0.35153	2	0.80451	-7.6992	0	0.55048	-0.66601	2
Gpr155	0.081844	0.83357	2	0.96037	-4.2511	0	0.057739	-0.23818	2	0.18804	-4.0468	2
Lrg1	0.081869	0.74013	4	0.98154	-3.679	0	0.85717	-6.0074	0	0.20458	-2.3062	2
9130023H24Rik	0.082027	1.1006	3	0.069226	0.039431	2	0.87779	-7.0825	0	0.38563	-0.9088	3
Vmn2r73	0.082107	1.2135	2	0.80112	-1.1652	0	0.13126	0.33402	2	0.38845	-2.5036	1
Nfkbib	0.082137	0.84291	3	0.19546	0.003038	1	0.66316	-7.1645	1	0.90056	-3.1965	0
Pex1	0.082151	-0.32459	2	0.90538	-3.6039	0	0.9433	-5.3531	0	0.87293	-1.463	0
Snapc2	0.082172	1.7644	1	0.54885	-1.689	0	0.0003495	-6.946	1	0.4199	-2.2684	1
Gsdmc4	0.082287	-0.37894	2	0.89196	-3.9189	0	0.56775	-4.8831	1	0.14961	-0.76929	2
Dnajc13	0.082319	0.81229	4	0.2845	0.066623	3	0.87377	-6.5723	0	0.86403	-3.6213	0
Nmnat1	0.082422	0.78412	3	0.70387	-0.057411	1	0.60005	-1.5665	2	0.083511	0.19272	3
Rdm1	0.082483	-0.22105	2	0.94943	-4.4523	0	0.56443	-4.1755	2	0.37214	-0.93239	3
Rilp	0.082528	-0.82481	2	0.65668	-1.3927	2	0.91647	-4.8795	0	0.86383	-1.922	0
Mif	0.082556	0.94872	3	0.33668	-0.55163	2	0.47802	-1.7554	1	0.11289	0.24724	4
Ddx4	0.082581	-0.49407	3	0.70455	-2.4395	1	0.67262	-6.6412	1	0.50136	-1.902	2
1700019G17Rik	0.082649	0.8319	4	0.68763	-1.2052	2	0.011913	0.81864	5	0.34644	-0.96605	2
Arl2	0.082762	-1.586	2	0.94674	-5.2819	0	0.19331	-0.83008	3	0.94575	-2.6603	0
Dhfr	0.08278	1.014	3	0.27502	-0.83987	2	0.18284	0.32007	3	0.029617	1.4469	3
Rab17	0.0828	-0.99265	2	0.39572	-1.8611	2	0.10839	-1.1969	2	0.68845	-4.1166	1
Zbtb45	0.082898	0.64414	3	0.26813	-2.1765	1	0.55098	-5.7235	1	0.35477	0.30505	2
1110004E09Rik	0.082985	0.28777	1	0.27257	-1.0669	1	0.14764	-2.453	2	0.36518	-0.7223	2
Arrdc5	0.082996	0.85678	3	0.5944	-2.0863	1	0.98436	-8.0983	0	0.14826	-0.60965	2
Sbk1	0.083047	0.76564	2	0.54844	-2.8499	0	0.24306	-6.9749	1	0.72145	-0.64021	0
Ap1ar	0.083088	0.18103	3	0.97086	-3.3089	0	0.051289	-4.9547	1	0.60173	-0.71178	2
Chrd	0.08317	-3.4325	2	0.34508	0.053063	2	0.96556	-7.7071	0	0.44764	-0.6556	2
Ntn3	0.083275	0.51784	4	0.016242	-1.3535	2	0.96395	-7.3613	0	0.26237	0.29617	3
Calcoco2	0.083315	0.85534	3	0.62803	-2.6586	1	0.00052018	2.7369	3	0.72628	-2.8897	1
Acin1	0.083366	0.48025	2	0.9322	-4.1693	0	0.22663	-4.4812	1	0.89938	-2.8407	0
Ahrr	0.08339	0.98434	3	0.87226	-1.9441	0	0.083049	-2.6069	1	0.096385	0.70148	3
CTRLMM_66638	0.083399	1.5551	1	0.36913	-0.20154	0	0.86682	-8.3899	0	0.92767	-5.8021	0
Kcnip3	0.083404	-6.6926	1	0.80096	-2.4194	1	0.60787	-5.0553	1	0.34461	-0.8842	2
CTRLHS_57639	0.083471	2.0193	1	0.36823	-0.32331	0	0.40842	-6.9995	0	0.55772	-4.4118	0
Slc20a1	0.083513	-0.92264	2	0.87938	-1.5838	1	0.44842	-3.8214	2	0.57642	-2.4973	1
Agap1	0.083625	0.83488	4	0.079671	-0.043228	3	0.64482	-3.9977	1	0.54472	-1.6464	1
Cyp2c40	0.083627	0.58824	3	0.8583	-2.1308	0	0.50045	-7.7434	1	0.37288	-3.2046	1
A730008H23Rik	0.083657	1.136	2	0.055003	1.7086	2	0.88863	-6.8973	0	0.90069	-5.033	0
Fopnl	0.083715	-4.0918	1	0.34312	-1.3068	2	0.50551	-1.5937	1	0.4566	-2.604	1
Dpep2	0.083744	0.45765	4	0.32921	-0.28119	3	0.5503	-5.7023	1	0.060982	0.41601	3
Fam125a	0.083822	0.63206	3	0.13659	0.47352	3	0.1643	-0.62222	1	0.78185	-1.7906	1
Vmn1r198	0.083824	-3.6072	2	0.095942	-0.30033	2	0.76954	-3.6901	0	0.56555	-3.9704	1
Gnas	0.083866	0.62519	4	0.28136	-0.067954	3	0.54595	-6.0963	1	0.57379	-0.40242	1
Kcns2	0.083882	-0.7456	3	0.030049	0.54864	5	0.6855	-5.2859	1	0.16273	0.1783	3
Mybpc3	0.083928	0.20069	3	0.57749	-3.2722	1	0.44591	-1.4654	2	0.099158	-0.35313	3
Pnpla7	0.083948	-1.2581	2	0.98813	-2.6896	0	0.11815	0.26915	3	0.21909	-0.81698	3
Cd52	0.083976	-2.0002	2	0.92779	-1.1632	0	0.4343	-1.271	2	0.54116	-1.4018	2
Hook3	0.084145	-0.23358	2	0.15994	-1.4275	2	0.20802	-5.2412	1	0.18684	-2.6941	2
Cwc27	0.084223	0.78625	2	0.09314	-0.6845	1	0.76939	-2.821	0	0.21805	-0.35438	1
Gpr137b	0.084257	-0.96786	2	0.010714	1.495	4	0.44566	-5.7877	2	0.94934	-5.0703	0
Pcyt1a	0.084369	0.8324	3	0.42255	-0.27799	2	0.65994	-5.1966	1	0.25235	0.22493	3
Gtf2a2	0.084371	1.3163	2	0.84043	-2.4897	0	0.0040498	2.2918	3	0.54609	-0.27989	1
Mybph	0.084446	-1.038	2	0.65977	-2.7207	1	0.34236	-4.9176	2	0.3097	-0.069191	3
Stox2	0.08447	-0.78446	3	0.59561	-0.53578	2	0.90621	-4.9852	0	0.47142	-5.3338	1
Ndufaf1	0.084792	-0.96079	3	0.78234	-2.2229	1	0.53638	-7.4932	2	0.46452	-0.70882	1
Gpx7	0.084979	-0.62128	2	0.014727	0.85541	4	0.53523	-2.7444	1	0.095436	-1.2139	1
Tcf4	0.084999	0.78339	2	0.11444	-0.53401	1	0.72673	-4.7243	0	0.79767	-1.3204	0
Fgf21	0.085032	-0.70272	2	0.63261	-2.0395	1	0.84321	-7.3998	0	0.91346	-3.3035	0
Pramef8	0.085045	-1.3884	2	0.77781	-1.3866	1	0.41998	-7.3395	1	0.37304	-1.9969	1
Vmn2r96	0.085136	-1.2773	1	0.21672	-0.59406	2	0.081642	-7.0317	2	0.5846	-2.2469	1
Mamstr	0.085184	0.59203	3	0.43611	-1.0711	2	0.66745	-3.8706	1	0.2931	-2.6857	1
CTRLMM_67298	0.085228	1.6907	1	0.84859	-7.5699	0	0.12575	1.6238	1	0.80331	-7.8735	0
Tnfrsf1b	0.085238	0.78509	3	0.38142	-2.1935	2	0.80998	-7.0213	0	0.91049	-0.91741	0
Bcr	0.08532	-1.1631	2	0.53282	-0.80183	2	0.17484	-1.0864	2	0.47168	-1.6847	1
Vps26a	0.085398	0.55715	4	0.63333	-3.2098	1	0.26999	-0.34031	3	0.52374	-0.19826	2
Ccnjl	0.085414	-0.89188	2	0.34987	-3.3808	2	0.264	-4.8779	1	0.18543	-2.167	2
Neil1	0.085583	0.49923	3	0.088871	0.73899	4	0.12815	-1.6281	3	0.81241	-1.6914	1
Iqcf3	0.085593	0.57172	4	0.95088	-1.386	0	0.63802	-3.1996	1	0.52025	-1.3314	2
Rhbdd3	0.085641	0.91491	3	0.097453	0.14841	3	0.61885	-4.3718	1	0.92286	-1.6958	0
Fam129b	0.085651	1.0062	3	0.034769	1.3036	4	0.55738	-0.7512	1	0.54819	-3.1182	2
Cd34	0.08568	0.43945	3	0.69569	-3.5104	1	0.07701	-2.3655	1	0.95039	-1.9884	0
Inpp5k	0.085722	-2.6222	1	0.087139	1.4113	2	0.90632	-7.2328	0	0.96184	-6.7936	0
Tnfaip1	0.085789	-4.9154	2	0.97318	-3.2184	0	0.60014	-0.58954	1	0.28079	-1.4279	2
Dnmt1	0.085815	0.48099	4	0.13331	0.34481	4	0.29563	-7.323	2	0.56413	-0.11491	2
Vmn1r218	0.085868	-1.7842	1	0.99753	-4.012	0	0.48629	-4.2092	1	0.88078	-2.1445	0
Slc10a6	0.085992	-0.065296	3	0.88134	-1.8105	1	0.62878	-6.0369	1	0.31164	-0.047245	3
Cldn26	0.085996	-2.4822	1	0.34762	-1.7933	1	0.50407	-1.9686	1	0.25759	-0.034437	2
Map4k2	0.086101	-1.9035	1	0.94949	-1.9445	0	0.6564	-7.3365	1	0.64373	-0.19912	1
Psmg4	0.086176	1.3384	2	0.22543	-1.1858	1	0.43707	-1.3966	0	0.14949	-0.3373	1
Kdm4c	0.086192	1.0576	3	0.14409	0.021672	2	0.72874	-1.3349	1	0.53544	-0.54435	2
Fam116b	0.086247	0.050073	3	0.21966	-0.27485	2	0.84456	-4.3605	0	0.44137	-4.1605	1
Nmrk2	0.086294	0.14603	3	0.96475	-2.5581	0	0.73247	-5.3986	1	0.51629	-1.7166	2
Trib2	0.086325	-0.24118	2	0.80269	-1.7367	1	0.08801	-1.9074	2	0.11228	0.45326	3
BC026585	0.08669	0.94083	3	0.40895	-0.15041	2	0.7314	-2.1976	1	0.93909	-1.7948	0
1200014J11Rik	0.086724	-1.9465	1	0.26483	-0.22965	2	0.19431	-3.3414	2	0.091256	0.13725	3
4930564D02Rik	0.086747	-1.8845	1	0.37231	-0.37443	2	0.17683	-1.5084	2	0.57406	-1.43	2
Dhps	0.086904	1.967	1	0.24023	0.74625	1	0.029027	1.91	1	0.025793	-1.7574	1
Ankrd11	0.086915	0.53293	4	0.87268	-1.623	1	0.68346	-3.7229	1	0.97214	-6.2515	0
Ccdc86	0.086931	1.9225	1	0.64727	-6.8266	0	0.0054363	0.56149	1	0.59186	-4.5701	0
Siah1b	0.086963	0.42468	3	0.29602	-0.3996	2	0.066035	-0.56403	1	0.71076	-1.1472	1
Rnf138rt1	0.086967	0.51986	3	0.38239	-0.95689	2	0.22296	-2.0188	1	0.67433	-2.0795	1
CTRLHS_57731	0.086988	1.3722	1	0.85767	-1.9906	0	0.96279	-6.5909	0	0.3417	-0.2071	0
Tmem95	0.087007	0.34104	3	0.11258	-1.2288	1	0.44921	-0.87718	2	0.92224	-2.7249	0
St6gal2	0.087067	0.19399	2	0.2734	-0.018753	2	0.93791	-6.8629	0	0.96873	-3.2209	0
Fbxo46	0.087075	-0.025029	2	0.51242	-3.8511	2	0.66035	-4.3758	1	0.69359	-1.4081	1
Asb3	0.087209	0.74613	4	0.46555	-0.28112	3	0.39721	-4.5122	1	0.2267	0.13411	3
Rbbp4	0.087217	0.54968	2	0.7545	-6.978	0	0.01817	-3.1981	2	0.94324	-4.1277	0
Itga5	0.087247	0.51063	4	0.48942	-1.6426	2	0.077216	0.013262	3	0.22706	-0.21577	2
BC030336	0.087307	0.83912	3	0.96268	-2.7153	0	0.40952	-6.525	1	0.49584	-0.49241	1
B4galt1	0.087312	0.53518	3	0.44414	-0.80756	2	0.63014	-7.479	1	0.38654	-4.4565	1
Myzap	0.087354	-0.90313	1	0.92718	-0.94476	0	0.47006	-4.4539	2	0.95831	-2.6402	0
Tmem52b	0.087423	1.2379	2	0.022724	1.8716	2	0.68379	-1.2472	0	0.12104	0.26674	2
Casc4	0.087444	1.3832	2	0.076707	1.5481	2	0.1608	0.9887	2	0.86543	-3.5571	0
Krt20	0.087486	-3.5452	2	0.091861	0.72169	4	0.36597	-4.4523	2	0.23747	-2.3594	1
Tfec	0.087575	-0.8768	3	0.42803	-0.14817	3	0.23632	0.27101	3	0.10226	-0.081672	2
Nmu	0.087606	0.39374	3	0.65026	-4.2894	1	0.17144	-4.533	2	0.80768	-3	1
Spatc1	0.08768	-0.63813	2	0.411	-1.4664	1	0.48095	-5.4566	1	0.75003	-0.99986	1
Lmod3	0.087762	0.73842	3	0.73532	-2.5343	1	0.51956	-6.233	1	0.75366	-4.3459	0
Leng1	0.087893	0.67099	3	0.38708	-0.067034	2	0.69425	-4.7184	0	0.45008	-3.4113	1
CTRLHS_57661	0.087911	1.3659	1	0.98943	-8.5332	0	0.9594	-5.7437	0	0.98058	-4.8665	0
St6galnac2	0.087913	0.86119	3	0.95773	-1.6612	0	0.15306	-1.5446	3	0.36544	-3.5227	1
Ldhb	0.087943	0.066526	2	0.82507	-0.29678	1	0.76888	-2.4823	0	0.075449	0.45021	3
Hist1h4c	0.088006	-2.8324	1	0.89938	-3.3767	0	0.012908	1.0474	4	0.045469	1.2519	3
Rrp1	0.088052	1.9429	1	0.62527	-5.3158	0	0.33804	-2.2589	0	0.010113	3.2887	1
Aqp2	0.088054	0.95809	3	0.37357	-0.050115	2	0.55289	-0.54012	1	0.42157	-0.57142	2
Tspan33	0.088111	-0.28202	2	0.097264	-0.45232	2	0.13054	0.053824	2	0.77511	-2.0674	0
Tex19.1	0.088186	-1.0143	1	0.076445	0.26486	4	0.02134	0.88724	4	0.77934	-1.6725	1
Pbx3	0.0882	0.36709	4	0.5574	-2.1567	2	0.66755	-5.6777	1	0.20204	0.066075	3
Vmn1r11	0.088214	0.80107	2	0.6224	-1.9354	0	0.70758	-6.8447	0	0.39204	-0.69707	1
Fam98b	0.08828	1.2576	2	0.6964	-3.8487	0	0.80413	-4.4956	0	0.48329	-2.2736	1
Mme	0.088331	0.69548	3	0.1384	0.68514	3	0.62702	-2.1662	1	0.39057	-1.3277	2
Fcrla	0.088394	-0.062323	3	0.69249	-1.5659	2	0.045732	1.223	4	0.94443	-2.0983	0
Disp2	0.088401	-6.9332	1	0.47337	-1.5167	2	0.42031	-7.2683	2	0.1495	-0.045858	2
Klhdc2	0.088574	0.60119	3	0.16139	0.18529	2	0.62502	-1.3782	1	0.56871	-2.5762	1
Rnf25	0.088608	0.35614	4	0.062331	0.34682	3	0.69647	-6.5695	1	0.20297	-1.3072	2
Nfib	0.088614	-2.2729	2	0.046198	0.70422	4	0.93146	-4.7782	0	0.38418	-1.2736	2
Mdn1	0.088633	1.4128	2	0.33567	-0.92658	1	0.10658	-0.090978	1	0.62697	-1.9415	0
Cct8l1	0.088673	0.91548	3	0.017432	1.0251	4	0.25816	-1.8647	2	0.23151	-0.38008	2
Tns4	0.088718	-0.6189	2	0.30419	-2.6158	2	0.93594	-6.1826	0	0.88592	-2.0736	0
Vpreb2	0.088731	-1.8423	2	0.3573	-0.51048	2	0.81506	-2.6371	0	0.43259	-2.6992	1
Gm5592	0.088763	-0.97777	1	0.78801	-2.2484	0	0.13205	1.1591	2	0.11205	1.3162	2
Gm10142	0.088774	0.83795	3	0.67674	-2.7263	1	0.61698	-1.8748	1	0.91923	-2.7638	0
Apoc1	0.088776	-4.563	2	0.090596	0.52127	4	0.6985	-7.5343	1	0.87206	-4.2036	0
Phrf1	0.088806	-0.89332	2	0.07567	0.63312	3	0.73674	-2.8675	1	0.53934	-4.4026	2
Fam38a	0.088812	0.56337	4	0.29573	-0.25226	2	0.90982	-8.0662	0	0.60751	-0.71775	1
Svs3a	0.088952	-1.9348	3	0.20634	-1.8072	2	0.69104	-2.8511	1	0.6852	-2.4659	1
Prr15l	0.088983	-0.25777	2	0.40556	-1.8717	2	0.089188	-2.1182	2	0.027385	-0.51521	1
Lhx3	0.088991	1.3235	2	0.2301	-0.53531	1	0.70887	-6.902	0	0.55934	-1.1064	1
Zswim2	0.089032	-0.84489	2	0.38005	-0.35773	3	0.27882	-2.095	2	0.88447	-3.4198	0
Hemk1	0.089198	-0.99507	2	0.91163	-1.1869	0	0.13095	-4.7953	2	0.08198	0.65476	3
Zfp655	0.089206	0.68053	4	0.28488	-0.69537	3	0.84689	-7.1274	0	0.59266	-2.9938	2
Raver2	0.089267	0.39152	3	0.2279	0.43336	3	0.67117	-5.2628	1	0.40459	-2.1017	1
Snx6	0.089369	0.97334	3	0.398	-0.77267	2	0.23272	-6.341	1	0.23772	0.22602	3
Mrps11	0.08937	-2.9513	2	0.1765	0.68414	3	0.5108	-1.4929	1	0.86656	-1.2111	0
Arid1b	0.089472	0.46213	4	0.96151	-4.1847	0	0.68512	-4.5304	1	0.69173	-0.59326	1
Jph4	0.089551	-1.539	2	0.25766	-1.9298	2	0.96699	-7.7567	0	0.75396	-2.4562	1
Prelid2	0.089565	0.40702	4	0.99525	-5.7802	0	0.83183	-4.8419	0	0.091673	-0.44399	2
Ubap2	0.089593	0.98563	3	0.59217	-1.6404	2	0.20524	0.19502	3	0.82318	-3.3418	0
Hba-x	0.089613	-0.41465	2	0.83885	-3.4025	0	0.76406	-1.6365	0	0.21738	-1.4321	2
Fmo6	0.089613	1.1631	3	0.18272	0.36422	2	0.36249	-6.9304	2	0.77463	-4.6002	1
Treml1	0.089617	0.20136	3	0.27019	-0.22955	2	0.78848	-5.7304	1	0.096715	0.64414	4
Rab3b	0.089709	-2.3768	2	0.25671	-0.041463	3	0.12886	-4.3983	2	0.97588	-5.9215	0
Pkig	0.08975	0.18939	2	0.68994	-3.6882	1	0.69896	-7.1788	0	0.82238	-1.9887	0
Kif26b	0.08985	-0.75948	2	0.64266	-0.72677	2	0.69724	-6.3825	1	0.11794	-0.94294	2
Fam199x	0.089991	0.18927	3	0.87189	-1.044	1	0.74559	-7.5015	1	0.97934	-2.3574	0
Ppp3ca	0.089993	0.69281	3	0.38841	-0.67371	2	0.45625	-0.37912	2	0.27465	0.099486	3
Fzd4	0.090171	-1.0209	2	0.27649	-2.4071	2	0.40936	-4.0703	2	0.18848	-0.56365	3
Pacs1	0.090174	-1.3703	1	0.6022	-3.1197	1	0.33756	-1.3853	2	0.59461	-1.702	1
Pdzrn3	0.090223	0.69629	2	0.16154	0.54893	3	0.23229	-1.6899	1	0.60476	-1.3599	1
Nsmce2	0.090341	-0.49501	1	0.52872	-0.42199	2	0.21653	0.26465	3	0.68155	-1.7188	1
D630033O11Rik	0.09037	-2.1432	2	0.23449	0.45144	3	0.20712	0.19966	3	0.51148	-1.5127	2
Tgfbi	0.090385	0.49526	4	0.52546	-1.1405	2	0.46318	-2.6922	2	0.26677	-0.29721	2
Tm9sf2	0.090419	0.37831	4	0.51182	-0.31236	2	0.29922	-0.37852	3	0.14938	0.11876	4
Dpysl2	0.090458	-2.9987	2	0.87403	-1.3417	1	0.16342	-3.1015	3	0.70106	-2.3627	1
Cd160	0.090495	0.47382	3	0.25839	-0.88042	3	0.31738	-4.1208	2	0.89015	-1.4018	0
Sel1l	0.090497	0.58332	3	0.3442	-1.9932	2	0.50945	-7.1809	1	0.695	-3.4824	1
5430421N21Rik	0.090666	0.46941	1	0.77168	-4.4402	0	0.36581	-3.3562	2	0.63602	-0.2892	1
Csl	0.090689	-0.26053	2	0.54756	-1.6725	2	0.55367	-5.038	2	0.23389	-0.69857	2
Sdsl	0.090732	-0.56784	2	0.33941	-0.8274	1	0.50342	-1.2964	1	0.93439	-6.1346	0
Rbm31y	0.090802	1.1541	2	0.58869	-3.1519	1	0.17502	0.67984	2	0.98459	-2.2992	0
Rtp4	0.090866	0.66574	4	0.94855	-1.9013	0	0.6015	-6.7619	1	0.18152	-2.0287	2
Cyp3a44	0.091049	0.29513	3	0.21749	0.45761	3	0.85422	-7.2289	0	0.35172	-5.1021	1
Csf3	0.091095	0.64584	2	0.44143	-0.84518	1	0.36984	-3.4221	2	0.19484	-1.3292	2
Atg3	0.091139	-0.68903	2	0.3644	-0.4422	2	0.93813	-5.1092	0	0.024048	1.5606	4
Klrb1f	0.091194	1.3212	2	0.90016	-2.0229	0	0.64763	-2.0622	0	0.81828	-3.0366	0
Gabrb3	0.091251	-0.26184	2	0.13068	0.38606	3	0.99307	-4.7833	0	0.22231	-0.13264	2
Tspyl5	0.091344	0.68663	4	0.26071	-1.4032	3	0.65158	-7.0123	1	0.083096	0.50023	4
Myl3	0.091374	-1.6657	1	0.9349	-3.844	0	0.6917	-1.1467	1	0.76114	-1.0587	1
CTRLMM_67104	0.091409	1.5545	1	0.015473	2.3488	1	0.76593	-8.1228	0	0.58926	-1.7849	0
Chd2	0.091458	-2.5145	1	0.14687	-4.6576	1	0.2762	-0.080607	2	0.76423	-3.7072	1
Atpbd4	0.091482	0.69222	4	0.71449	-0.95391	2	0.91224	-5.3057	0	0.57613	-1.194	2
Cul4a	0.091522	-0.91592	2	0.6596	-1.9204	1	0.33502	-3.6987	1	0.61022	-2.683	1
Slc7a6	0.09156	-2.9542	2	0.91334	-1.0968	0	0.088141	1.0853	3	0.25844	0.27141	3
Krtcap2	0.091562	-0.22101	2	0.076771	-3.9417	1	0.33185	-0.7319	2	0.39614	-2.9021	1
Nipa2	0.091574	0.68341	4	0.66251	-1.2875	1	0.86416	-4.8398	0	0.57713	-0.22437	2
Rangrf	0.091601	0.3795	2	0.94422	-4.2613	0	0.053711	1.5556	3	0.88696	-7.1757	0
Foxh1	0.091663	0.28978	3	0.93862	-2.24	0	0.28677	-3.4201	2	0.88286	-2.0608	0
Tnfsf8	0.091754	0.3601	4	0.83558	-1.432	1	0.59805	-2.5348	2	0.40247	-1.996	2
Grcc10	0.091829	-0.96534	1	0.70312	-1.0861	1	0.83353	-7.8439	0	0.22431	-0.10666	2
CTRLMM_66407	0.091943	1.8387	1	0.003633	3.244	1	0.45905	-7.2352	0	0.61116	-7.2067	0
Gm19345	0.092013	-1.2297	1	0.5375	-1.7726	1	0.69461	-6.8392	1	0.86879	-5.6509	0
Slc24a6	0.092043	0.38854	4	0.48545	-0.91314	2	0.91032	-5.1213	0	0.093403	-4.5824	1
Fus	0.092107	-4.7972	1	0.092566	0.84255	3	0.87768	-2.9592	0	0.058581	-6.9869	2
Bbs1	0.092166	-3.2148	1	0.50775	-1.2268	1	0.18639	-2.1152	2	0.33727	-2.9771	1
CTRLMM_66990	0.092176	1.386	1	0.72831	-1.7045	0	0.93493	-8.6537	0	0.41258	-0.60061	0
CTRLHS_57278	0.092284	1.5006	1	0.3524	-0.11088	0	0.82344	-8.2691	0	0.75982	-2.5984	0
Rsf1	0.092316	0.71269	3	0.95503	-1.6782	0	0.32181	-2.559	1	0.10759	0.53328	4
C1qbp	0.092317	1.0989	2	0.0028702	1.4681	2	0.80315	-6.8778	0	0.17119	0.61547	3
Dcaf10	0.092391	0.24053	3	0.75428	-1.1886	1	0.87098	-6.3173	0	0.83983	-7.1738	0
B230120H23Rik	0.092393	0.60098	4	0.11102	0.26551	3	0.45902	-2.4944	2	0.802	-2.0443	1
Gm561	0.092515	0.17488	1	0.67242	-1.4097	0	0.30682	-4.6165	1	0.46186	-4.6069	1
Vat1	0.092547	0.39051	2	0.93222	-2.7731	0	0.67014	-7.1846	1	0.97802	-6.8621	0
Pold4	0.092606	0.62985	3	0.46982	-0.21755	2	0.74234	-4.127	0	0.36078	-0.622	1
Plk1	0.092792	-4.3382	1	0.47325	-5.8139	1	0.3313	-5.285	1	0.48996	-1.3304	1
B3galnt1	0.092808	1.0894	3	0.99408	-5.6914	0	0.62032	-6.4659	1	0.36704	-0.86027	1
Osbp2	0.092924	0.58002	4	0.19859	0.15859	3	0.18233	-0.77367	3	0.059702	0.76432	4
Ccl27a	0.093007	1.8438	1	0.65374	-6.8539	0	0.13657	1.7416	1	0.5987	-7.1566	0
Vmn1r90	0.093105	1.1673	3	0.83111	-2.9985	1	0.0095783	1.212	3	0.93205	-2.0676	0
E4f1	0.093136	-0.44819	2	0.58322	0.012762	2	0.88635	-4.347	0	0.15636	0.47143	3
Ucn3	0.093224	-0.88912	1	0.69273	-6.7542	1	0.033054	-7.0852	2	0.43112	-0.52687	1
Zfp444	0.093381	0.9189	3	0.94916	-3.4113	0	0.93523	-6.9927	0	0.94934	-1.5298	0
Rnf19a	0.093452	-0.40033	3	0.78692	-1.51	1	0.89758	-3.6601	0	0.82441	-2.4138	1
Krt73	0.093577	0.49244	4	0.78473	-2.7067	1	0.72651	-7.9079	1	0.55103	-0.51226	2
Rnf43	0.093655	0.36091	3	0.93517	-1.9643	0	0.45702	-1.0606	2	0.52755	-2.1853	1
Stag1	0.093658	0.88313	3	0.52883	-0.061021	2	0.089693	-0.031923	2	0.065621	1.2002	3
Zfp735	0.093674	0.51919	3	0.92499	-1.5405	0	0.31593	-5.4898	2	0.17563	-0.48621	2
Usp27x	0.093781	-1.2516	1	0.3236	0.013246	2	0.70676	-3.1283	1	0.4849	-1.78	1
Hist3h2ba	0.093837	0.78304	3	0.17144	0.51646	2	0.37097	-1.0013	2	0.57757	-2.9157	1
Nabp1	0.09385	-4.5881	1	0.47629	-0.083165	2	0.80332	-4.2749	1	0.76902	-1.3411	1
Ctps2	0.093972	-1.5449	3	0.59429	-0.6449	2	0.71875	-4.7687	1	0.18801	-0.28235	3
Ptprf	0.093973	0.52461	4	0.25983	0.13831	3	0.4367	-7.0261	1	0.31293	-1.6683	1
Tomm6	0.093992	-4.9201	1	0.8901	-7.4793	0	0.79604	-4.6889	0	0.64867	-0.5101	0
Ino80c	0.094169	-4.9083	2	0.4887	-3.2081	2	0.95651	-7.6622	0	0.052655	1.1202	3
Taldo1	0.094359	0.14641	3	0.62213	-0.55999	2	0.5507	-7.6147	1	0.081072	1.0279	3
Phldb3	0.094381	0.24846	2	0.82183	-1.2443	0	0.18805	-5.9253	1	0.076878	-1.4926	2
6030419C18Rik	0.094522	0.42579	4	0.27535	0.15888	3	0.53208	-7.4812	1	0.070223	-0.24777	3
Htra1	0.094527	0.92572	3	0.46886	-1.624	2	0.43936	-7.8484	1	0.75296	-0.93167	1
Gkn3	0.094589	-0.04138	2	0.22461	-0.40609	2	0.39158	-7.3898	1	0.21077	-0.08182	2
Eepd1	0.094632	-1.3733	2	0.95718	-3.1447	0	0.41999	-0.24272	2	0.26394	-0.39924	2
Aldh1l1	0.094649	-1.3935	2	0.81953	-1.0543	1	0.86081	-7.8407	0	0.51131	-0.63314	2
Casp2	0.094675	-1.3022	2	0.34116	0.1603	3	0.54895	-3.2573	2	0.81278	-0.77732	1
Tgfb1i1	0.094678	0.68928	2	0.13209	0.94238	2	0.36253	-1.9747	1	0.0083755	1.534	3
Lpcat2	0.094702	0.7387	4	0.69358	-0.87634	2	0.33044	-5.0634	2	0.70101	-2.8508	1
Ypel2	0.094706	0.30695	3	0.6956	-2.7197	1	0.82172	-1.6459	0	0.17687	0.4502	3
CTRLMM_66983	0.094836	1.6581	1	0.78049	-5.7526	0	0.58946	-7.6806	0	0.73512	-7.652	0
Lrrc10b	0.094884	-1.1243	1	0.78113	-4.0031	0	0.97881	-7.9196	0	0.17687	0.20683	2
Vmn1r43	0.094891	0.76291	2	0.92822	-2.9264	0	0.1293	-6.8615	2	0.32437	-4.9021	1
Rgs4	0.094954	0.95748	3	0.77799	-1.0573	0	0.57669	-0.74701	1	0.085247	-0.75914	1
CTRLHS_57218	0.094966	1.6375	1	0.074835	1.7517	1	0.61134	-7.739	0	0.5917	-2.3831	0
Tectb	0.094993	-0.70231	2	0.20927	-1.5547	2	0.68006	-5.9573	1	0.65996	-0.50919	2
Fbxw7	0.094994	-0.086912	2	0.15188	-0.00063952	3	0.1912	0.092477	3	0.25198	-0.23237	3
Gys1	0.095071	0.76673	3	0.10484	-0.088276	2	0.45481	-0.71303	2	0.10458	-0.074105	2
Mfsd3	0.095159	-2.5891	2	0.68455	-3.2561	1	0.41775	-4.7016	1	0.50337	-2.6401	1
Elavl1	0.095237	-1.417	2	0.024981	1.2412	4	0.38742	-8.5121	2	0.19882	0.14443	3
Rheb	0.095274	-0.17802	2	0.031147	0.9934	4	0.26641	-3.3752	1	0.17233	0.37733	3
Man1b1	0.095448	0.017744	1	0.32629	0.12921	3	0.091189	-2.3081	2	0.12584	0.56282	3
Commd9	0.095556	-1.5485	2	0.85298	-2.8196	0	0.96311	-7.8071	0	0.41105	-1.3617	1
Rad52	0.095613	-0.90707	1	0.40481	-2.2324	1	0.069264	1.5972	2	0.63958	-0.79563	0
Arl6ip1	0.095659	-3.3488	1	0.017241	0.56538	4	0.84402	-7.8931	0	0.3806	-0.86588	3
Adssl1	0.095672	-0.39904	2	0.86673	-1.9329	0	0.73093	-2.9861	1	0.41882	-0.83466	2
Chfr	0.095727	0.28652	4	0.96696	-0.82338	0	0.81252	-1.0492	1	0.65423	-1.1206	1
6330407J23Rik	0.095774	-0.1855	2	0.55485	-5.9709	1	0.43244	-7.783	1	0.53665	-1.8955	1
CTRLHS_57842	0.09583	1.5597	1	0.75097	-3.2457	0	0.18847	0.93528	1	0.52552	-1.6189	0
Clk1	0.095845	0.19364	3	0.17668	0.28831	3	0.76857	-3.2071	1	0.72324	-0.8287	1
Zfp426	0.095852	0.82449	3	0.15563	-0.40137	2	0.2408	-7.5506	1	0.21952	0.37361	3
Xylt2	0.095905	0.55763	2	0.23986	0.078421	1	0.0318	2.2568	2	0.15209	0.87461	2
Ccdc92	0.095947	-2.8109	2	0.724	-1.1186	1	0.85373	-4.3045	0	0.63936	-1.1444	1
Tuba3a	0.096004	0.79861	3	0.33863	-3.4662	1	0.14288	-2.1525	2	0.56092	-1.9506	2
Hspg2	0.096117	-0.40151	2	0.97149	-2.0114	0	0.56796	-7.4077	1	0.45615	-0.4552	2
5730559C18Rik	0.096283	0.66688	3	0.38566	-1.4292	2	0.69884	-7.5694	1	0.081185	-0.98847	2
Gprasp1	0.096342	-0.27669	2	0.55374	-0.4595	2	0.26073	-0.87448	2	0.41637	-4.0515	1
Dirc2	0.096372	0.55565	3	0.31415	-0.069538	2	0.5269	-6.8742	1	0.12889	-1.4837	2
Zfp106	0.096465	-0.46387	3	0.846	-0.79017	1	0.57661	-0.81981	2	0.35412	-0.75933	3
Arnt	0.096542	-0.48856	3	0.74832	-0.9904	1	0.5668	-1.9001	2	0.23907	-0.34565	2
Dpm1	0.09665	0.82933	3	0.04329	1.2	3	0.56136	-5.6389	1	0.11467	0.35755	3
Map3k2	0.096656	0.13259	3	0.2347	-0.95664	1	0.35843	-2.7901	2	0.01607	1.8104	3
Gltp	0.096677	-2.353	1	0.11008	0.86283	2	0.73503	-0.90846	0	0.59648	-2.7578	1
CTRLMM_66775	0.096679	1.4688	1	0.28451	0.28592	1	0.4056	-1.5583	0	0.077363	1.679	1
Pramef17	0.096752	0.18376	2	0.87371	-3.9333	0	0.90737	-7.9613	0	0.23403	-2.4806	2
Ctps	0.096838	-2.4736	1	0.12026	-0.415	2	0.91888	-7.0739	0	0.73845	-4.4106	1
Zfp322a	0.096858	-1.0682	2	0.69676	-0.18649	1	0.4229	-2.3683	2	0.59738	-0.54791	1
Slc12a8	0.096867	0.22628	2	0.010551	2.0671	2	0.15883	-2.5578	2	0.11306	-2.6139	1
Slmap	0.096879	0.35281	3	0.84816	-5.0277	0	0.83417	-2.1488	0	0.081224	-1.7544	1
CTRLHS_57599	0.096893	1.2512	1	0.23221	0.48098	1	0.97281	-8.9645	0	0.11812	1.0979	1
Ntm	0.096959	0.65052	3	0.16531	0.37613	3	0.53532	-6.7952	1	0.9083	-2.7724	0
Nol3	0.096961	0.30726	3	0.90583	-3.1053	0	0.75312	-3.9342	1	0.98642	-5.404	0
Wscd2	0.097007	-1.3819	2	0.95431	-4.7688	0	0.20678	-6.3016	1	0.28477	-4.2959	1
Trim32	0.097011	-0.62685	1	0.42342	-0.22757	3	0.013608	0.61761	5	0.59636	-3.6748	1
Cks2	0.097054	1.151	2	0.42316	-1.5898	1	0.19368	0.51698	2	0.28936	0.14086	2
Aaed1	0.097097	-0.35319	2	0.79359	-4.2632	1	0.85116	-5.5007	0	0.0032352	2.0114	3
2810459M11Rik	0.097237	1.826	1	0.45301	-1.2289	0	0.36371	-6.749	1	0.88114	-6.9128	0
Cacna1g	0.097283	0.96767	3	0.34136	-0.31125	2	0.065396	1.355	3	0.88861	-3.7382	0
Dppa5a	0.09735	1.5364	1	0.065749	1.7538	1	0.58669	-6.1957	0	0.67764	-3.8055	0
Ift172	0.097458	0.48172	3	0.14662	-1.6682	2	0.26891	-5.7909	2	0.36041	-0.64676	1
Pigz	0.097486	-2.7517	2	0.49985	-1.3349	2	0.27335	-4.0028	2	0.44287	-1.3141	2
St6galnac1	0.097519	-1.9608	1	0.95525	-2.6699	0	0.025216	1.4317	3	0.55069	-1.0942	1
Klrg1	0.097524	0.25429	3	0.48836	-1.1545	1	0.081884	0.50476	3	0.63835	-1.8806	2
Ndufa4	0.097613	-0.16385	1	0.062895	1.0982	2	0.9113	-7.9805	0	0.58441	-1.59	0
Lipo1	0.0977	0.65555	2	0.006086	1.9571	2	0.67242	-1.885	1	0.70921	-1.7899	1
Macf1	0.097721	-0.81132	2	0.21691	-3.2562	2	0.52124	-8.2986	1	0.24883	-1.0563	1
Cyp4f40	0.097835	0.40754	3	0.87373	-2.1115	0	0.75938	-2.9613	1	0.21701	-0.6346	2
Fmo2	0.097865	-1.9899	1	0.59668	-0.46806	2	0.76999	-5.4889	1	0.1002	0.41816	3
Mdh1b	0.097875	-0.81154	1	0.72214	-2.3538	1	0.12765	0.39675	2	0.86432	-2.1517	0
CTRLHS_57614	0.097931	1.2223	1	0.12936	1.0066	1	0.97748	-9.0344	0	0.053324	1.6741	1
Zfp93	0.097938	-0.57019	2	0.86579	-4.4949	0	0.93241	-7.3843	0	0.57283	-2.3952	2
Pfkfb2	0.09794	0.45633	4	0.47462	-0.59149	2	0.77812	-2.843	1	0.94795	-0.58443	0
Scel	0.097966	0.3618	3	0.095971	0.53384	4	0.017844	-2.7228	2	0.83678	-3.3741	1
Cd4	0.098012	-0.78303	2	0.55137	-1.0875	1	0.012214	1.7431	3	0.43203	-0.37323	2
Hhatl	0.098022	-5.443	2	0.68566	-0.66624	2	0.22418	-7.443	2	0.99779	-6.1348	0
Rps6ka1	0.098113	0.57536	4	0.3297	-3.2917	2	0.863	-8.3231	0	0.78103	-0.11951	1
Pfdn2	0.098151	1.4228	2	0.5247	0.0017546	1	0.42178	-4.1619	1	0.033407	-3.6107	1
Cog7	0.098185	0.72599	3	0.55428	-2.2127	1	0.14001	-1.1379	2	0.90165	-4.9975	0
Kcnc1	0.09833	0.15705	2	0.96833	-3.5787	0	0.92636	-7.7584	0	0.88594	-5.5839	0
Ap2a1	0.098386	0.49707	4	0.88937	-0.40517	1	0.68973	-2.6664	1	0.40637	-2.7424	1
Dcdc2c	0.098487	-0.567	2	0.154	0.57837	2	0.90228	-6.5522	0	0.83728	-2.2345	0
Gm13088	0.098515	-0.97913	1	0.73694	-2.726	1	0.90789	-4.4522	0	0.41782	-0.67058	2
Samsn1	0.098523	0.6293	4	0.69578	-0.55371	2	0.081576	0.71307	4	0.41383	-1.7178	2
Tlr3	0.098535	0.77471	4	0.010864	1.2945	4	0.11969	-3.5825	3	0.45213	-1.8985	2
Clasp1	0.098583	-0.077358	2	0.73131	-5.2132	1	0.84021	-7.1343	0	0.66724	-2.2084	2
Saa2	0.09862	1.1408	2	0.91763	-1.7805	0	0.32144	-8.1783	1	0.82178	-1.4279	0
AI467606	0.098631	0.36301	4	0.72722	-1.3949	2	0.15539	-3.0862	3	0.87527	-2.0949	0
Clock	0.098641	-0.69654	2	0.98969	-2.9238	0	0.45062	-1.6491	2	0.40813	-0.46137	1
Eif4ebp3	0.098718	-1.9182	1	0.89727	-2.3175	0	0.65754	-7.0435	1	0.85732	-6.1347	0
Otx2	0.09879	-1.3276	1	0.76329	-2.5621	1	0.33068	-0.23419	2	0.88884	-1.8511	0
Smpd2	0.098844	-0.011064	3	0.31581	-0.69233	3	0.79146	-1.9945	1	0.479	-1.6945	2
Akap12	0.099005	-0.12471	3	0.27344	-1.3588	1	0.065013	0.76751	4	0.028549	0.71708	5
Pramef12	0.099109	0.72646	3	0.39376	-0.52613	2	0.6289	-4.2755	1	0.64534	-1.4714	2
CTRLMM_67319	0.099114	1.2965	1	0.15526	0.9275	1	0.075416	1.8456	1	0.032777	2.0686	1
Ano5	0.099114	0.59393	4	0.42463	-1.7878	1	0.9721	-7.6128	0	0.25098	0.18145	3
Nr2c2ap	0.099128	0.50598	3	0.24528	0.48059	3	0.90957	-7.0589	0	0.96526	-3.0297	0
Gm14496	0.09914	1.1049	2	0.80813	-1.7128	0	0.614	-3.3193	0	0.77694	-0.79689	0
Sh3d19	0.099169	-2.3695	1	0.053588	0.62572	4	0.9691	-7.76	0	0.65693	-3.4485	2
Smpx	0.099267	0.37952	3	0.62571	-1.9771	1	0.17477	-3.9479	2	0.83495	-2.6462	0
Scgb2b2	0.099303	1.166	2	0.45972	-0.080563	1	0.13745	0.92736	2	0.68634	-1.2033	0
Setbp1	0.099463	0.45998	4	0.080296	0.47095	3	0.63658	-5.1139	1	0.84057	-2.3966	1
Lars2	0.099513	-1.7192	2	0.73986	-1.1643	1	0.77806	-0.77492	1	0.0040084	0.71846	3
Stxbp6	0.09958	0.70279	4	0.10326	0.77657	4	0.96436	-8.2614	0	0.20957	-3.704	2
Rgp1	0.09961	1.38	2	0.74975	-4.2822	0	0.27998	-0.19515	1	0.5809	-5.3157	1
CTRLMM_67293	0.099646	1.4275	1	0.89238	-4.2577	0	0.81989	-8.2583	0	0.15692	0.97058	1
Cnnm3	0.099679	-0.046234	2	0.62174	-2.1069	1	0.22217	-1.4628	1	0.37819	-0.040151	2
Zfc3h1	0.099688	1.1029	3	0.22689	-1.2292	2	0.55435	-7.3521	1	0.98956	-5.5438	0
Sumo1	0.099706	0.70114	2	0.73648	-1.893	0	0.57791	-0.48498	0	0.76094	-0.31774	0
Vmn2r106	0.099713	0.44104	4	0.88465	-2.2122	1	0.4054	-5.0909	1	0.19971	-1.6083	2
Zfp865	0.099718	0.57547	4	0.70186	-2.9272	1	0.12867	-1.2685	3	0.36157	-0.93628	2
Slc6a2	0.099735	0.83803	3	0.11759	0.72853	3	0.41642	-4.969	1	0.16592	-1.7023	1
Hells	0.099755	-0.83993	2	0.28041	-0.85503	2	0.1971	-0.30922	3	0.96063	-1.2369	0
Clvs1	0.099904	0.58688	4	0.26934	-0.22994	3	0.13149	-0.704	3	0.79967	-4.2217	1
Tmpo	0.10016	-0.09222	3	0.64749	-0.0048934	2	0.080979	0.3554	4	0.82078	-1.5937	1
Arhgef4	0.10019	-1.4878	1	0.76954	-1.4092	1	0.81957	-7.5277	0	0.32113	-3.3287	1
Ppfia1	0.10032	0.37285	3	0.83183	-1.4109	1	0.18158	-1.3821	1	0.34543	-0.042955	2
Amhr2	0.10038	0.26125	4	0.78482	-0.50583	1	0.85781	-1.7772	0	0.78296	-0.24158	1
Scd4	0.10049	0.75831	3	0.47659	0.14328	2	0.27928	-0.99555	2	0.22991	0.30058	3
Cacng6	0.10054	-1.6279	2	0.93904	-1.5716	0	0.90427	-5.0733	0	0.032441	-0.68058	2
Tmem109	0.10062	-2.0042	2	0.45061	-0.80713	2	0.40915	-2.5199	1	0.70042	-1.8151	1
Pxk	0.10066	0.17132	3	0.1066	0.20522	3	0.22312	-1.1895	3	0.18049	-0.35529	3
Pcsk2	0.10074	-0.15734	1	0.014966	1.3375	4	0.76406	-6.3948	1	0.6073	-0.47048	2
Lrmp	0.10081	-1.3959	1	0.22428	-2.0543	1	0.51297	-1.231	2	0.97882	-4.6966	0
Tacr1	0.10086	-0.43692	1	0.068296	0.70301	4	0.61972	-1.4039	1	0.14854	0.14004	3
2410089E03Rik	0.10095	1.2344	2	0.62313	-1.5032	1	0.63121	-6.827	1	0.82254	-3.7484	0
Mrpl46	0.10097	0.96352	2	0.49238	-1.6874	1	0.51195	-2.4678	1	0.87837	-2.8529	0
CTRLHS_57176	0.10102	1.7753	1	0.63738	-6.7861	0	0.4328	-7.1172	0	0.015284	3.0923	1
Gtf3c6	0.10102	-6.7077	2	0.25563	0.41959	3	0.89786	-5.8127	0	0.31135	-7.2565	1
Ctdsp1	0.10109	0.87079	3	0.11175	0.96913	3	0.92994	-7.6916	0	0.78823	-6.1675	0
Tdpoz1	0.10118	1.6426	1	0.43269	-0.81263	0	0.53511	-7.5176	0	0.60573	-3.1262	0
S1pr3	0.10121	0.41943	4	0.51591	-2.025	2	0.65118	-4.5049	1	0.67574	-2.1317	1
Trappc3	0.10123	1.4437	2	0.056224	1.4587	2	0.72285	-6.354	0	0.10537	-2.3838	1
Clcnka	0.10127	-0.55983	1	0.51926	-1.1746	2	0.6279	-5.9813	1	0.12854	0.25287	3
Cenpm	0.10129	0.3972	3	0.044529	0.54893	5	0.39771	-3.3142	2	0.88215	-1.9092	0
Acvr1	0.10133	-1.3611	1	0.2703	0.17294	3	0.46236	-1.0999	2	0.33567	-0.36902	3
Atp6v0b	0.10138	-0.89139	2	0.60474	-0.39688	1	0.068283	-6.7605	2	0.10398	-3.9707	2
Ercc6l	0.10139	0.31771	4	0.1533	-0.13919	2	0.68009	-0.76369	1	0.11769	-0.63155	3
Senp3	0.10145	-1.0659	1	0.087883	-0.71601	2	0.18341	0.18245	2	0.11813	-0.87678	2
Bnc1	0.10145	-0.91642	2	0.029052	1.1033	4	0.16714	0.58937	3	0.40308	-4.6605	2
Gm382	0.10151	0.94089	3	0.44438	-3.2238	1	0.79445	-3.0719	1	0.98493	-2.861	0
Isca1	0.10159	0.70288	1	0.2691	0.62782	1	0.013969	2.4935	3	0.23778	0.40698	2
Ak5	0.10159	0.45149	3	0.045277	0.028127	3	0.24756	-2.5511	3	0.58531	0.038932	2
Hps5	0.10159	-1.1125	1	0.91274	-1.22	0	0.16567	-6.9548	1	0.79227	-4.817	1
2410012M07Rik	0.10168	0.80537	3	0.04199	1.2502	4	0.82347	-2.8055	0	0.24489	-0.62688	2
M6pr	0.10168	-0.46	3	0.42428	-0.36311	3	0.69959	-1.8186	1	0.43908	-2.7152	1
Zfp114	0.10191	-0.32695	1	0.58345	-0.32554	2	0.24254	-0.88	2	0.84431	-1.1102	0
Prx	0.10197	0.57681	3	0.86159	-0.82123	0	0.89824	-7.483	0	0.39256	-2.2524	1
Med20	0.10197	1.2465	2	0.14634	1.1543	2	0.37969	-2.1788	1	0.64676	-7.4556	0
Rap1gds1	0.10203	0.64645	4	0.13504	-1.2949	2	0.08554	-2.703	2	0.4567	-2.0636	2
Gnat2	0.10215	-1.1895	2	0.84757	-1.8657	0	0.81971	-7.8008	0	0.78007	-1.1118	1
Dlec1	0.10226	0.78649	3	0.15386	0.67318	3	0.67687	-8.1719	1	0.27059	-0.40344	2
Plcb3	0.10227	-2.1284	2	0.53681	-0.29408	2	0.21643	-3.3943	2	0.50179	-0.98583	2
Fam100a	0.10231	-2.4004	1	0.99787	-4.8553	0	0.031912	-0.49196	2	0.77881	-0.79497	1
C030046E11Rik	0.10232	-2.8466	2	0.50143	-2.0362	2	0.82209	-6.2376	0	0.97355	-6.427	0
Lass5	0.10249	0.78022	3	0.84611	-4.2738	0	0.042853	0.6991	4	0.6329	-0.64854	1
Has3	0.10252	0.043046	3	0.19002	-2.6322	1	0.082457	-1.6415	2	0.59524	-1.7117	2
Cs	0.10271	0.76052	3	0.042659	1.1944	4	0.89565	-7.6423	0	0.82657	-2.6584	1
Qsox1	0.10282	0.34398	4	0.6846	-0.097692	1	0.24809	-1.6097	2	0.28561	-0.98699	1
Fbrs	0.10284	-3.0184	2	0.48779	-0.98876	2	0.20943	-3.144	3	0.36666	-0.83949	3
Pcf11	0.10291	1.5983	1	0.37103	-0.28041	0	0.13332	-2.3278	1	0.74942	-7.1202	0
Zadh2	0.10295	-3.5307	2	0.0069369	-0.50143	3	0.77564	-7.7746	1	0.83768	-4.0719	1
Pacs2	0.10306	-1.2087	3	0.4897	-2.0921	2	0.55432	-4.6167	2	0.20775	-3.91	1
Mroh2a	0.10306	0.51838	3	0.65628	-2.5209	1	0.27559	-3.3945	2	0.88389	-6.1439	0
Lppr2	0.10309	0.36896	4	0.74844	-2.389	1	0.59546	-2.42	2	0.36631	0.05615	3
Crisp1	0.10321	0.2837	3	0.017062	1.26	4	0.38823	-0.63654	2	0.99245	-3.5061	0
Tjp3	0.10323	0.60987	3	0.35748	-3.3241	2	0.064303	1.0829	3	0.48054	-0.64976	2
Cypt14	0.10325	-0.29498	2	0.74238	-1.7167	1	0.95045	-7.4901	0	0.39194	-0.29588	2
Gm13271	0.10325	0.89973	2	0.80725	-1.7797	0	0.71231	-4.9234	0	0.46888	-3.4706	1
Csnk2a1	0.10326	0.37061	3	0.26578	-0.42389	2	0.13	-0.33995	3	0.81149	-1.8657	1
Cdc34	0.1033	0.20084	3	0.42882	-0.67779	3	0.23936	0.047022	3	0.054639	0.59659	3
Eqtn	0.10332	0.44105	3	0.025684	0.9949	3	0.63867	-5.9478	1	0.48876	-0.85499	2
Cd80	0.10342	0.61709	3	0.56755	0.048958	2	0.51188	-0.37247	2	0.88718	-1.3817	0
Gnb1l	0.10342	-0.4637	2	0.5536	-1.3146	1	0.56055	-3.2387	2	0.9692	-4.3375	0
Ppic	0.10343	-0.92784	2	0.38595	-1.3512	2	0.85631	-5.067	0	0.18081	-3.2319	1
Arl8a	0.10349	-3.6944	2	0.84812	-3.9544	1	0.77044	-7.1682	1	0.47231	-2.8527	1
Polr3k	0.10358	1.1938	2	0.027801	1.024	2	0.56318	-2.9458	1	0.26213	0.24071	2
Gpr108	0.10361	0.95777	3	0.52876	-1.9648	2	0.64773	-3.995	1	0.64297	-2.3415	1
Tjap1	0.1038	0.86844	3	0.20196	-0.75792	2	0.36962	-5.8814	1	0.51483	-1.8471	1
Rbm4b	0.10395	1.1078	3	0.7441	-5.0134	1	0.94732	-6.1146	0	0.077966	-1.3703	2
Ahctf1	0.10399	1.1548	1	0.14341	0.91661	1	0.069693	1.7745	1	0.9903	-5.089	0
Abcb10	0.10401	0.35811	3	0.66663	-0.47104	1	0.2355	-7.4765	1	0.075802	1.14	3
[truncated: 16,664 more rows]
