# Supplementary material for: HUWE1 controls tristetraprolin proteasomal degradation by regulating its phosphorylation
Source: eLife journal article supplement (doi:10.7554/elife.83159), 2023-02-27
Supplement: fig5-data2 [file Figure 5-source data 2.xlsx]

## Sheet: RAW_unt_sgPSMB7_vs_unt_sgROSA
Protein names	Gene names	logFC_unt_sgPSMB7 vs unt_sgROSA	adj.P.Val_unt_sgPSMB7 vs unt_sgROSA
Plectin	Plec	-0.0888663	0.294747
AHNAK nucleoprotein (desmoyokin)	Ahnak	0.000801314	0.993363
Cytoplasmic dynein 1 heavy chain 1	Dync1h1	0.382819	0.0243311
Microtubule-actin cross-linking factor 1	Macf1	0.0547076	0.560893
E3 ubiquitin-protein ligase RNF213	Rnf213	-0.138562	0.306418
Myosin-9	Myh9	0.0858525	0.512243
Talin-1	Tln1	0.276827	0.0700287
Clathrin heavy chain 1	Cltc	0.0138413	0.934532
Filamin-B	Flnb	0.0955224	0.257045
Pyruvate kinase PKM	Pkm	-0.0415027	0.699001
Filamin-A	Flna	0.107642	0.203331
Fatty acid synthase	Fasn	-0.164639	0.119006
Ras GTPase-activating-like protein IQGAP1	Iqgap1	0.0601474	0.454897
Proliferation marker protein Ki-67	Mki67	0.0857437	0.489017
E3 SUMO-protein ligase RanBP2	Ranbp2	-0.0939612	0.35686
E3 ubiquitin-protein ligase UBR4	Ubr4	0.399217	0.0205139
eIF-2-alpha kinase activator GCN1	Gcn1	-0.0723714	0.441573
Heat shock protein HSP 90-beta	Hsp90ab1	-0.00646224	0.955202
U5 small nuclear ribonucleoprotein 200 kDa helicase	Snrnp200	-0.0856257	0.291581
Prolow-density lipoprotein receptor-related protein 1	Lrp1	0.0691801	0.562884
Pre-mRNA-processing-splicing factor 8	Prpf8	-0.0948294	0.341415
Heterogeneous nuclear ribonucleoprotein M	Hnrnpm	-0.00252376	0.975506
Nucleoprotein TPR	Tpr	-0.0936648	0.441717
Heat shock cognate 71 kDa protein	Hspa8	0.254435	0.127172
Actin, cytoplasmic 1	Actb	-0.0634613	0.66075
Chromodomain-helicase-DNA-binding protein 4	Chd4	0.00497369	0.958239
Midasin	Mdn1	-0.0220416	0.83965
Alpha-2-macroglobulin	A2M	NA	NA
Myb-binding protein 1A	Mybbp1a	-0.155319	0.35686
CAD protein	Cad	-0.110849	0.358798
Plastin-2	Lcp1	-0.0570721	0.544249
Bifunctional glutamate/proline--tRNA ligase	Eprs1	0.0358419	0.754762
Vimentin	Vim	-0.0139009	0.917803
Transitional endoplasmic reticulum ATPase	Vcp	0.352351	0.0532354
Elongation factor 2	Eef2	-0.308638	0.112712
60 kDa heat shock protein, mitochondrial	Hspd1	-0.173592	0.195651
Vacuolar protein sorting-associated protein 13C	Vps13c	0.0260614	0.835655
Glyceraldehyde-3-phosphate dehydrogenase	Gapdh	-0.268656	0.41271
Prelamin-A/C	Lmna	-0.0761124	0.527054
Heat shock 70 kDa protein 4	Hspa4	0.0307986	0.768163
Dedicator of cytokinesis protein 2	Dock2	0.163247	0.122562
Myoferlin	Myof	0.223695	0.108261
Leucine-rich PPR motif-containing protein, mitochondrial	Lrpprc	-0.178874	0.0811997
T-complex protein 1 subunit gamma	Cct3	0.101382	0.326191
Nuclear mitotic apparatus protein 1	Numa1	-0.0014618	0.98706
Vigilin	Hdlbp	0.0421028	0.696603
Eukaryotic translation initiation factor 3 subunit A	Eif3a	-0.0822678	0.338569
Proteasome adapter and scaffold protein ECM29	Ecpas	0.0625028	0.672903
ATP-dependent RNA helicase DDX3X	Ddx3x	-0.0900116	0.336999
Arginine--tRNA ligase, cytoplasmic	Rars1	0.113578	0.333074
Afadin	Afdn	-0.0882191	0.376666
Fructose-bisphosphate aldolase A	Aldoa	-0.0512743	0.789138
Importin-5	Ipo5	-0.117772	0.353497
Endoplasmin	Hsp90b1	-0.0863149	0.441083
Trifunctional enzyme subunit alpha, mitochondrial	Hadha	-0.191501	0.233845
HEAT repeat-containing protein 1	Heatr1	-0.261173	0.134382
Uncharacterized protein	APOB	NA	NA
Cytoskeleton-associated protein 5	Ckap5	0.0887211	0.400794
Nucleolar RNA helicase 2	Ddx21	-0.312129	0.0314858
Alpha-actinin-1	Actn1	0.112078	0.243655
Coatomer subunit alpha	Copa	0.177277	0.150005
Glucose-6-phosphate 1-dehydrogenase X	G6pdx	-0.190231	0.143856
Sarcoplasmic/endoplasmic reticulum calcium ATPase 2	Atp2a2	-0.0808598	0.408224
Coatomer subunit beta	Copb1	0.0978416	0.323015
Eukaryotic translation initiation factor 4 gamma 1	Eif4g1	0.0516495	0.696603
Trifunctional purine biosynthetic protein adenosine-3	Gart	-0.1299	0.352785
Phosphoglycerate kinase 1	Pgk1	-0.0967551	0.543238
Heat shock protein 105 kDa	Hsph1	0.331603	0.0416289
Sodium/potassium-transporting ATPase subunit alpha-1	Atp1a1	-0.0796711	0.460924
Alpha-enolase	Eno1	-0.163513	0.372136
Protein RRP5 homolog	Pdcd11	-0.273427	0.0435234
Staphylococcal nuclease domain-containing protein 1	Snd1	-0.0590993	0.470008
Hexokinase-2	Hk2	-0.312851	0.0279417
Small subunit processome component 20 homolog	Utp20	-0.0212604	0.852564
Leucine--tRNA ligase, cytoplasmic	Lars1	0.0726598	0.397865
ATP-dependent RNA helicase A	Dhx9	-0.181062	0.104352
Structural maintenance of chromosomes protein 1A	Smc1a	-0.143352	0.207691
Splicing factor 3B subunit 1	Sf3b1	-0.182612	0.088216
Ubiquitin-like modifier-activating enzyme 1	Uba1	0.0649873	0.447426
UDP-glucose:glycoprotein glucosyltransferase 1	Uggt1	0.0478698	0.633761
Rab GDP dissociation inhibitor beta	Gdi2	-0.0625012	0.607818
Monofunctional C1-tetrahydrofolate synthase, mitochondrial	Mthfd1l	-0.342215	0.0216217
DNA (cytosine-5)-methyltransferase 1	Dnmt1	-0.239218	0.0485006
Bifunctional purine biosynthesis protein ATIC	Atic	-0.0615064	0.60322
Transketolase	Tkt	-0.130702	0.241132
Splicing factor, proline- and glutamine-rich	Sfpq	-0.167653	0.390175
DNA topoisomerase 2-alpha	Top2a	-0.255735	0.0359253
CCR4-NOT transcription complex subunit 1	Cnot1	0.0845104	0.371379
Splicing factor 3B subunit 3	Sf3b3	-0.23573	0.0718803
Ribosome-binding protein 1	Rrbp1	-0.105481	0.306217
E3 ubiquitin-protein ligase HUWE1	Huwe1	0.0933548	0.35686
Structural maintenance of chromosomes protein 3	Smc3	-0.103084	0.355111
Structural maintenance of chromosomes flexible hinge domain-containing protein 1	Smchd1	-0.217535	0.118531
DNA damage-binding protein 1	Ddb1	0.102178	0.356115
Fermitin family homolog 3	Fermt3	0.194682	0.113493
Endoplasmic reticulum chaperone BiP	Hspa5	0.176922	0.198135
Hexokinase-1	Hk1	-0.164093	0.199225
Alanine--tRNA ligase, cytoplasmic	Aars1	0.331069	0.0495549
N-alpha-acetyltransferase 15, NatA auxiliary subunit	Naa15	-0.0782503	0.495933
T-complex protein 1 subunit alpha	Tcp1	-0.110449	0.297084
Aconitate hydratase, mitochondrial	Aco2	-0.0127902	0.92631
Lamin-B1	Lmnb1	-0.308436	0.0512873
Protein disulfide-isomerase A3	Pdia3	-0.0752093	0.541566
Alpha-actinin-4	Actn4	0.00914041	0.919153
Kinesin-1 heavy chain	Kif5b	0.175108	0.112689
Valine--tRNA ligase	Vars1	-0.157982	0.157915
DNA replication licensing factor MCM6	Mcm6	-0.1896	0.0896257
Cullin-associated NEDD8-dissociated protein 1	Cand1	-0.0504722	0.542849
Lon protease homolog, mitochondrial	Lonp1	0.0263752	0.810759
Spectrin alpha chain, non-erythrocytic 1	Sptan1	2.36085	0.000387797
Phosphatidylinositol 3,4,5-trisphosphate 5-phosphatase 1	Inpp5d	0.0506374	0.634485
Moesin	Msn	0.182896	0.243044
T-complex protein 1 subunit beta	Cct2	0.0583085	0.512622
Adenylyl cyclase-associated protein 1	Cap1	-0.229247	0.17027
V-type proton ATPase catalytic subunit A	Atp6v1a	0.273907	0.0878832
Transferrin receptor protein 1	Tfrc	-0.86936	0.00693143
Early endosome antigen 1	Eea1	0.0926295	0.412437
T-complex protein 1 subunit theta	Cct8	0.0195591	0.848743
Stress-70 protein, mitochondrial	Hspa9	-0.156943	0.160027
Tubulin beta-2A chain	Tubb2a	-0.0475775	0.869819
Heat shock protein HSP 90-alpha	Hsp90aa1	0.212825	0.0832513
6-phosphogluconate dehydrogenase, decarboxylating	Pgd	-0.0257209	0.764123
DNA replication licensing factor MCM2	Mcm2	-0.158619	0.100351
Isoleucine--tRNA ligase, cytoplasmic	Iars1	0.0503447	0.641095
T-complex protein 1 subunit epsilon	Cct5	-0.115052	0.290374
RNA cytidine acetyltransferase	Nat10	-0.174267	0.0971958
E3 ubiquitin-protein ligase HECTD1	Hectd1	0.245754	0.175508
Elongation factor 1-alpha 1	Eef1a1	-0.356692	0.0712347
RNA cytosine C(5)-methyltransferase NSUN2	Nsun2	-0.0535502	0.637108
Nuclear pore complex protein Nup93	Nup93	-0.0243679	0.78972
Dynactin subunit 1	Dctn1	0.0950976	0.312425
Cytoplasmic FMR1-interacting protein 1	Cyfip1	-0.0177405	0.928265
Major vault protein	Mvp	0.310572	0.0665054
Protein PRRC2C	Prrc2c	0.172653	0.14386
Tyrosine-protein kinase BAZ1B	Baz1b	-0.242266	0.0587322
Filamin-C	Flnc	0.408682	0.0237084
Antiviral innate immune response receptor RIG-I	Ddx58	-0.038775	0.795394
Pre-mRNA-splicing factor ATP-dependent RNA helicase DHX15	Dhx15	-0.191724	0.144467
Phosphoribosylformylglycinamidine synthase	Pfas	-0.189398	0.124447
Unconventional myosin-XVIIIa	Myo18a	0.100457	0.483509
2-oxoglutarate dehydrogenase, mitochondrial	Ogdh	-0.256154	0.0623772
Glucose-6-phosphate isomerase	Gpi	-0.182935	0.236079
Tripeptidyl-peptidase 2	Tpp2	-0.0186912	0.85547
26S proteasome non-ATPase regulatory subunit 2	Psmd2	0.269132	0.0470377
Vinculin	Vcl	-0.113692	0.265417
Nucleoporin 205	Nup205	-0.111183	0.250835
Regulator of nonsense transcripts 1	Upf1	-0.0196448	0.848743
Creatine kinase B-type	Ckb	0.169841	0.140681
SWI/SNF-related matrix-associated actin-dependent regulator of chromatin subfamily A member 5	Smarca5	-0.130929	0.189068
DNA replication licensing factor MCM3	Mcm3	-0.245006	0.052855
Peptidyl-prolyl cis-trans isomerase FKBP4	Fkbp4	-0.0975185	0.394976
Tyrosine-protein phosphatase non-receptor type 6	Ptpn6	-0.0346976	0.718904
Tubulin alpha-1C chain	Tuba1c	-0.141556	0.416487
Poly [ADP-ribose] polymerase 1	Parp1	-0.0763169	0.501194
CCAAT/enhancer-binding protein zeta	Cebpz	-0.195881	0.092126
Non-POU domain-containing octamer-binding protein	Nono	-0.205341	0.103916
Golgi autoantigen, golgin subfamily b, macrogolgin 1	Golgb1	0.139526	0.281189
ATP synthase subunit beta, mitochondrial	Atp5f1b	-0.119725	0.248845
C-1-tetrahydrofolate synthase, cytoplasmic	Mthfd1	-0.194521	0.345541
Exportin-2	Cse1l	-0.137665	0.203754
Protein disulfide-isomerase A4	Pdia4	0.00449097	0.964071
CAP-Gly domain-containing linker protein 1	Clip1	0.268381	0.0506292
Structural maintenance of chromosomes protein 2	Smc2	-0.165358	0.102824
Nuclear migration protein nudC	Nudc	0.0249135	0.870409
Helicase with zinc finger domain 2	Helz2	0.0477532	0.762758
DNA-directed RNA polymerase II subunit RPB1	Polr2a	-0.144236	0.185554
T-complex protein 1 subunit delta	Cct4	-0.0973353	0.357239
Probable ATP-dependent RNA helicase DDX17	Ddx17	-0.158607	0.151077
Probable ATP-dependent RNA helicase DDX5	Ddx5	-0.146153	0.144522
1-phosphatidylinositol 4,5-bisphosphate phosphodiesterase gamma-2	Plcg2	0.057503	0.494367
26S proteasome regulatory subunit 8	Psmc5	0.399729	0.013109
Endoplasmic reticulum aminopeptidase 1	Erap1	-0.108556	0.337243
26S proteasome regulatory subunit 6A	Psmc3	0.500954	0.0106833
DNA ligase 1	Lig1	-0.0543999	0.555175
Methionine--tRNA ligase, cytoplasmic	Mars1	-0.0769688	0.537653
Exosome RNA helicase MTR4	Mtrex	-0.17892	0.140681
Ubiquitin-like modifier-activating enzyme 6	Uba6	-0.00180268	0.984313
Eukaryotic translation initiation factor 4 gamma 2	Eif4g2	-0.0417022	0.705449
Polyadenylate-binding protein 1	Pabpc1	-0.332514	0.105493
DNA replication licensing factor MCM5	Mcm5	-0.172544	0.134699
Gelsolin	Gsn	0.244686	0.0474478
Acetyl-CoA carboxylase 1	Acaca	-0.117861	0.211605
MICOS complex subunit Mic60	Immt	-0.0712962	0.555175
Interleukin enhancer-binding factor 3	Ilf3	-0.142246	0.260101
Protein disulfide-isomerase	P4hb	-0.243091	0.184836
T-complex protein 1 subunit eta	Cct7	0.020685	0.87819
Hypoxia up-regulated protein 1	Hyou1	-0.050659	0.717282
Dihydropyrimidinase-related protein 2	Dpysl2	0.00542409	0.956287
Lysine--tRNA ligase	Kars1	-0.0734084	0.483509
Cytosolic non-specific dipeptidase	Cndp2	0.176574	0.118209
E3 ubiquitin-protein ligase TRIP12	Trip12	0.336393	0.0314858
Importin subunit beta-1	Kpnb1	-0.130802	0.473556
Nucleolin	Ncl	-0.299502	0.075322
Protein mono-ADP-ribosyltransferase PARP14	Parp14	-0.255519	0.290198
Coiled-coil domain-containing protein 88B	Ccdc88b	0.176421	0.177651
Golgin subfamily A member 4	Golga4	0.196053	0.247909
NADPH--cytochrome P450 reductase	Por	-0.259851	0.0811997
DnaJ heat shock protein family (Hsp40) member C13	Dnajc13	-0.0289478	0.795996
Insulin-degrading enzyme	Ide	0.115043	0.199415
116 kDa U5 small nuclear ribonucleoprotein component	Eftud2	-0.0662009	0.595222
Histone-binding protein RBBP7	Rbbp7	-0.0313742	0.81195
Signal transducer and activator of transcription 1	Stat1	-0.0350914	0.740343
EH domain-containing protein 4	Ehd4	0.0494136	0.591461
Ubiquitin carboxyl-terminal hydrolase 14	Usp14	0.0395124	0.720872
Exportin-1	Xpo1	-0.140355	0.221354
Nuclear pore complex protein Nup214	Nup214	-0.0881713	0.381887
Heme oxygenase 1	Hmox1	0.103201	0.391534
Rho guanine nucleotide exchange factor 2	Arhgef2	0.0679116	0.448887
Cytosol aminopeptidase	Lap3	-0.0121769	0.914719
Heat shock 70 kDa protein 4L	Hspa4l	0.584663	0.013109
SWI/SNF complex subunit SMARCC1	Smarcc1	-0.00422539	0.967668
Nuclear pore complex protein Nup155	Nup155	-0.309513	0.061673
Serum albumin	ALB	NA	NA
Annexin A5	Anxa5	-0.0801116	0.796296
Fumarate hydratase, mitochondrial	Fh	-0.123533	0.489178
Neutral alpha-glucosidase AB	Ganab	-0.0902598	0.376145
Serine/arginine repetitive matrix protein 2	Srrm2	-0.154503	0.295371
Transcription intermediary factor 1-beta	Trim28	-0.151094	0.152893
Probable ubiquitin carboxyl-terminal hydrolase FAF-X	Usp9x	0.154447	0.197483
ATP synthase subunit alpha, mitochondrial	Atp5f1a	-0.134966	0.212146
STE20-like serine/threonine-protein kinase	Slk	0.126115	0.330181
Nucleolar protein 56	Nop56	-0.212811	0.0571779
DNA repair protein RAD50	Rad50	-0.0835829	0.402788
Annexin A2	Anxa2	-0.167113	0.154816
Structural maintenance of chromosomes protein 4	Smc4	-0.195468	0.0769578
Serrate RNA effector molecule homolog	Srrt	0.108144	0.291581
Coatomer subunit beta'	Copb2	0.135217	0.193881
2'-5'-oligoadenylate synthase 3	Oas3	0.0532668	0.616266
Thyroid hormone receptor-associated protein 3	Thrap3	-0.054709	0.717726
26S proteasome non-ATPase regulatory subunit 3	Psmd3	0.30637	0.0495549
Ubiquitin carboxyl-terminal hydrolase 5	Usp5	0.184631	0.0743764
Delta-1-pyrroline-5-carboxylate synthase	Aldh18a1	-0.266144	0.0583068
Vesicle-fusing ATPase	Nsf	-0.0158162	0.882277
DNA replication licensing factor MCM4	Mcm4	-0.301396	0.163443
Eukaryotic translation initiation factor 4 gamma 3	Eif4g3	0.0789144	0.55395
FACT complex subunit SPT16	Supt16h	-0.137338	0.195651
Protein flightless-1 homolog	Flii	0.107643	0.342554
L-lactate dehydrogenase A chain	Ldha	-0.247534	0.196763
Symplekin	Sympk	-0.0189934	0.856361
Glutamine--tRNA ligase	Qars1	-0.155722	0.494707
Serine hydroxymethyltransferase, mitochondrial	Shmt2	-0.205118	0.178254
Splicing factor 3b, subunit 2	Sf3b2	-0.0867783	0.429022
26S proteasome non-ATPase regulatory subunit 6	Psmd6	0.199414	0.147131
Annexin A1	Anxa1	0.0325751	0.811007
Glutamine--fructose-6-phosphate aminotransferase [isomerizing] 1	Gfpt1	-0.285928	0.0571779
Clustered mitochondria protein homolog	Cluh	-0.039713	0.763997
GRIP1-associated protein 1	Gripap1	0.0692798	0.489293
60S ribosomal protein L5	Rpl5	-0.118611	0.256568
Eukaryotic translation initiation factor 3 subunit C	Eif3c	0.0284508	0.740343
Carboxypeptidase D	Cpd	-0.264939	0.177651
26S proteasome non-ATPase regulatory subunit 1	Psmd1	0.312394	0.061673
Kinectin	Ktn1	-0.10461	0.392513
NADH-ubiquinone oxidoreductase 75 kDa subunit, mitochondrial	Ndufs1	-0.151263	0.115498
Stress-induced-phosphoprotein 1	Stip1	-0.0149337	0.867523
Elongation factor Tu, mitochondrial	Tufm	-0.0603912	0.478956
RuvB-like 1	Ruvbl1	0.0107491	0.919831
Malate dehydrogenase, mitochondrial	Mdh2	-0.175654	0.262512
Glycerol-3-phosphate dehydrogenase, mitochondrial	Gpd2	-0.275193	0.0403183
Switch-associated protein 70	Swap70	0.114047	0.236286
RuvB-like 2	Ruvbl2	-0.0676558	0.403056
THO complex subunit 2	Thoc2	-0.231867	0.117791
Receptor-type tyrosine-protein phosphatase C	Ptprc	0.0346723	0.83743
Double-stranded RNA-specific adenosine deaminase	Adar	0.0458339	0.855661
Heterogeneous nuclear ribonucleoprotein U	Hnrnpu	-0.259594	0.0532354
DNA replication licensing factor MCM7	Mcm7	-0.33677	0.059332
Baculoviral IAP repeat-containing protein 6	Birc6	0.29521	0.0376858
Aldo-keto reductase family 1 member B1	Akr1b1	-0.0482736	0.811444
Serotransferrin	TF	NA	NA
Probable ATP-dependent RNA helicase DDX46	Ddx46	-0.0675472	0.454656
La-related protein 1	Larp1	-0.0659625	0.710023
Calnexin	Canx	0.00828298	0.951292
Cysteine--tRNA ligase, cytoplasmic	Cars1	0.142552	0.15502
Eukaryotic initiation factor 4A-I	Eif4a1	-0.0548269	0.589429
General vesicular transport factor p115	Uso1	0.234453	0.103732
Eukaryotic translation initiation factor 5B	Eif5b	0.100746	0.436837
Septin-2	Septin2	0.00893306	0.934861
Heterogeneous nuclear ribonucleoprotein R	Hnrnpr	-0.230775	0.0685783
GMP synthase [glutamine-hydrolyzing]	Gmps	-0.0297299	0.806543
AP-1 complex subunit beta-1	Ap1b1	-0.0841499	0.422352
Heterogeneous nuclear ribonucleoprotein A1	Hnrnpa1	-0.305553	0.119026
Host cell factor 1	Hcfc1	-0.265455	0.227576
Calcium-binding mitochondrial carrier protein Aralar1	Slc25a12	-0.281752	0.205825
Asparagine--tRNA ligase, cytoplasmic	NARS1	0.26188	0.0838502
Eukaryotic translation initiation factor 3 subunit B	Eif3b	-0.086543	0.419808
ATP-citrate synthase	Acly	0.0220545	0.864331
Unconventional myosin-Va	Myo5a	0.0468254	0.686721
DnaJ homolog subfamily C member 7	Dnajc7	0.203237	0.0810905
Transducin beta-like protein 3	Tbl3	-0.0335102	0.810759
Cullin-2	Cul2	-0.0808566	0.469106
Ran GTPase-activating protein 1	Rangap1	0.203933	0.102208
Aspartate--tRNA ligase, cytoplasmic	Dars1	-0.0487609	0.609984
Phosphoglucomutase-1	Pgm1	-0.192217	0.130256
Elongation factor G, mitochondrial	Gfm1	-0.106079	0.265417
Heterogeneous nuclear ribonucleoprotein L	Hnrnpl	-0.200618	0.108606
GTP-binding protein 4	Gtpbp4	-0.178005	0.195651
Protein-tyrosine kinase 2-beta	Ptk2b	0.158935	0.119696
Putative helicase MOV-10	Mov10	-0.0785709	0.507365
Nodal modulator 1	Nomo1	-0.0784456	0.444576
Prolyl endopeptidase	Prep	-0.146468	0.32514
26S proteasome regulatory subunit 7	Psmc2	0.213393	0.0701559
Protein mono-ADP-ribosyltransferase PARP9	Parp9	-0.189048	0.157915
Plexin-B2	Plxnb2	-0.179034	0.0891733
Golgin subfamily A member 3	Golga3	0.113575	0.352785
Cold shock domain-containing protein E1	Csde1	-0.0417792	0.701975
Programmed cell death 6-interacting protein	Pdcd6ip	0.159308	0.134714
Pyruvate carboxylase, mitochondrial	Pc	-0.372369	0.0759721
Serine/threonine-protein kinase PAK 2	Pak2	-0.0026115	0.975506
ADP/ATP translocase 2	Slc25a5	-0.359892	0.252827
Protein RCC2	Rcc2	-0.136782	0.442022
Polypyrimidine tract-binding protein 1	Ptbp1	-0.404221	0.17669
60S ribosomal protein L3	Rpl3	-0.283264	0.225896
Enhancer of mRNA-decapping protein 4	Edc4	0.091134	0.429016
Apolipoprotein B receptor	Apobr	0.137087	0.358011
Triosephosphate isomerase	Tpi1	-0.169894	0.459077
Coatomer subunit delta	Arcn1	0.145725	0.171458
Reticulon-4	Rtn4	-0.154807	0.167258
Matrin-3	Matr3	-0.212041	0.0523594
ATP-dependent RNA helicase DDX1	Ddx1	0.0013012	0.985709
Biorientation of chromosomes in cell division protein 1-like 1	Bod1l	0.083883	0.669427
Ubiquitin carboxyl-terminal hydrolase 7	Usp7	-0.0959707	0.461484
Ribonuclease inhibitor	Rnh1	0.229123	0.154511
Vacuolar protein sorting-associated protein 35	Vps35	-0.048177	0.637583
WD repeat-containing protein 1	Wdr1	0.0483039	0.748298
Heterogeneous nuclear ribonucleoprotein K	Hnrnpk	-0.0643198	0.449921
RRP12-like protein	Rrp12	-0.127379	0.223022
Transcription elongation regulator 1	Tcerg1	-0.173759	0.0992036
Golgin subfamily A member 2	Golga2	-0.0672574	0.454939
Proliferating cell nuclear antigen	Pcna	-0.00840727	0.925459
Homeobox protein cut-like 1	Cux1	0.0378887	0.816244
ATP-binding cassette sub-family F member 1	Abcf1	-0.0058111	0.95796
Threonine--tRNA ligase 1, cytoplasmic	Tars1	-0.121497	0.21462
Golgi apparatus protein 1	Glg1	-0.413931	0.0117294
Sister chromatid cohesion protein PDS5 homolog A	Pds5a	-0.160706	0.140681
Elongation factor 1-gamma	Eef1g	-0.184259	0.261527
Arf-GAP with Rho-GAP domain, ANK repeat and PH domain-containing protein 1	Arap1	0.54634	0.0106833
Presequence protease, mitochondrial	Pitrm1	-0.00789012	0.940667
Eukaryotic translation initiation factor 3 subunit L	Eif3l	-0.0994433	0.360916
Probable ATP-dependent RNA helicase DDX27	Ddx27	-0.166365	0.0993845
Nuclear valosin-containing protein-like	Nvl	-0.0134375	0.893926
Nucleophosmin	Npm1	-0.315004	0.161399
UDP-N-acetylhexosamine pyrophosphorylase-like protein 1	Uap1l1	0.167123	0.0891733
Rho guanine nucleotide exchange factor 1	Arhgef1	-0.0117159	0.925459
Cell division cycle 5-like protein	Cdc5l	-0.114218	0.371082
Succinate dehydrogenase [ubiquinone] flavoprotein subunit, mitochondrial	Sdha	-0.177486	0.140641
NSFL1 cofactor p47	Nsfl1c	0.32176	0.0302285
Lipopolysaccharide-responsive and beige-like anchor protein	Lrba	-0.0312781	0.813488
Unconventional myosin-Ie	Myo1e	-0.0202981	0.87006
Catalase	Cat	-0.0395813	0.692056
Syntaxin-binding protein 1	Stxbp1	0.042889	0.646602
Calreticulin	Calr	-0.0114674	0.925364
N-acetylgalactosaminyltransferase 7	Galnt7	-0.294714	0.0302285
26S proteasome non-ATPase regulatory subunit 11	Psmd11	0.294321	0.059332
A-kinase anchor protein 9	Akap9	0.287013	0.0741017
Dolichyl-diphosphooligosaccharide--protein glycosyltransferase subunit 1	Rpn1	-0.14252	0.207691
Nardilysin	Nrdc	0.060444	0.535515
Ankyrin repeat and KH domain-containing 1	Ankhd1	0.236166	0.117791
Rho guanine nucleotide exchange factor 7	Arhgef7	-0.147936	0.237706
Aspartate aminotransferase, mitochondrial	Got2	-0.16465	0.10529
Proliferation-associated protein 2G4	Pa2g4	-0.10342	0.327379
26S proteasome regulatory subunit 4	Psmc1	0.285509	0.0583068
Guanine nucleotide-binding protein-like 3	Gnl3	-0.100329	0.333074
Intersectin-2	Itsn2	-0.0526118	0.672352
Isocitrate dehydrogenase [NADP] cytoplasmic	Idh1	0.361525	0.0231198
Obg-like ATPase 1	Ola1	-0.0608717	0.711568
Heterogeneous nuclear ribonucleoprotein U-like protein 2	Hnrnpul2	-0.0800494	0.34477
Polyribonucleotide nucleotidyltransferase 1, mitochondrial	Pnpt1	-0.123532	0.507729
Exportin-5	Xpo5	0.03869	0.669427
Protein transport protein Sec23B	Sec23b	-0.0219923	0.878583
Serine--tRNA ligase, cytoplasmic	Sars1	0.191682	0.189068
Cation-independent mannose-6-phosphate receptor	Igf2r	-0.017366	0.881378
Unconventional myosin-Id	Myo1d	-0.0020352	0.982203
E3 ubiquitin-protein ligase UBR5	Ubr5	0.0608401	0.803857
AP-3 complex subunit delta-1	Ap3d1	0.0980808	0.606804
AP-2 complex subunit alpha-1	Ap2a1	-0.0445689	0.67225
Deoxynucleoside triphosphate triphosphohydrolase SAMHD1	Samhd1	0.000672555	0.993909
Spliceosome RNA helicase Ddx39b	Ddx39b	-0.261802	0.0443806
Thyroid hormone receptor interactor 11	Trip11	0.449499	0.0938372
Dihydrolipoyllysine-residue acetyltransferase component of pyruvate dehydrogenase complex, mitochondrial	Dlat	-0.283147	0.0908071
ATP-dependent RNA helicase DHX29	Dhx29	-0.0383302	0.711225
Ubiquitin carboxyl-terminal hydrolase 4	Usp4	0.0797251	0.434695
Cytosolic phospholipase A2	Pla2g4a	0.0839172	0.346544
Serine/threonine-protein phosphatase 2A 65 kDa regulatory subunit A alpha isoform	Ppp2r1a	0.0875065	0.576547
1-phosphatidylinositol 4,5-bisphosphate phosphodiesterase	Plcb4	0.00852963	0.931317
Long-chain-fatty-acid--CoA ligase 4	Acsl4	-0.0516647	0.620651
Protein diaphanous homolog 1	Diaph1	0.154944	0.343362
26S proteasome regulatory subunit 10B	Psmc6	0.464524	0.00837424
Exosome complex exonuclease RRP44	Dis3	-0.0366289	0.766887
Nucleolar protein 58	Nop58	-0.158611	0.165129
Processing of 1, ribonuclease P/MRP family, (S. cerevisiae)	Pop1	0.0369317	0.747887
Probable RNA-binding protein 19	Rbm19	-0.144671	0.224287
Isocitrate dehydrogenase [NAD] subunit, mitochondrial	Idh3b	-0.202435	0.0721946
Eukaryotic translation initiation factor 5	Eif5	0.434906	0.059332
Rho GTPase-activating protein 45	Arhgap45	0.0947727	0.471814
ATPase family AAA domain-containing protein 3	Atad3	-0.200213	0.0912152
Protein arginine N-methyltransferase 1	Prmt1	-0.224558	0.143095
Ataxin-10	Atxn10	0.424609	0.0134753
D-3-phosphoglycerate dehydrogenase	Phgdh	0.0115177	0.917647
Tyrosine--tRNA ligase, cytoplasmic	Yars1	-0.004377	0.966284
Platelet-activating factor acetylhydrolase IB subunit beta	Pafah1b1	0.143492	0.252456
Constitutive coactivator of PPAR-gamma-like protein 1	FAM120A	0.0668876	0.419808
Pre-mRNA-processing factor 6	Prpf6	0.0976336	0.329128
Actin-related protein 3	Actr3	0.0647372	0.537756
Transcription elongation factor SPT5	Supt5h	0.154687	0.156326
Nuclear cap-binding protein subunit 1	Ncbp1	-0.128974	0.246579
Leucyl-cystinyl aminopeptidase	Lnpep	-0.130094	0.403675
Exosome component 10	Exosc10	-0.144431	0.23898
Transcription elongation factor SPT6	Supt6h	0.260608	0.0760285
Rho guanine nucleotide exchange factor 6	Arhgef6	0.149447	0.123594
Ubiquitin carboxyl-terminal hydrolase 15	Usp15	-0.118034	0.287206
von Willebrand factor A domain-containing protein 5A	Vwa5a	0.371233	0.075322
Radixin	Rdx	-0.0207933	0.878869
Coatomer subunit gamma-1	Copg1	0.0397523	0.868793
Plasma membrane calcium-transporting ATPase 1	Atp2b1	-0.0862606	0.426326
Succinyl-CoA:3-ketoacid coenzyme A transferase 1, mitochondrial	Oxct1	-0.225009	0.277927
Protein SON	Son	0.0227981	0.895274
Asparagine synthetase [glutamine-hydrolyzing]	Asns	0.0584487	0.669713
Nuclear pore complex protein Nup98-Nup96	Nup98	-0.084642	0.402788
Splicing factor 3A subunit 1	Sf3a1	-0.131206	0.143856
60S ribosomal protein L4	Rpl4	-0.275184	0.297084
Alpha-soluble NSF attachment protein	Napa	0.22951	0.137038
Cis-aconitate decarboxylase	Acod1	-0.177805	0.465833
DnaJ homolog subfamily A member 1	Dnaja1	0.522737	0.0376858
Nck-associated protein 1-like	Nckap1l	0.118619	0.362628
Hsp70-binding protein 1	Hspbp1	0.0389264	0.666612
Apoptotic chromatin condensation inducer in the nucleus	Acin1	0.0464849	0.747667
Heterogeneous nuclear ribonucleoproteins A2/B1	Hnrnpa2b1	-0.250678	0.227576
Receptor of activated protein C kinase 1	Rack1	-0.133402	0.478492
WD40 repeat-containing protein SMU1	Smu1	-0.0505239	0.803857
Probable global transcription activator SNF2L2	Smarca2	0.150508	0.23898
Heterogeneous nuclear ribonucleoprotein A3	Hnrnpa3	-0.34328	0.078875
26S proteasome non-ATPase regulatory subunit 12	Psmd12	0.154559	0.233845
Chloride intracellular channel protein 4	Clic4	0.0401403	0.799993
Eukaryotic translation initiation factor 3 subunit D	Eif3d	-0.0509408	0.631789
Adenosylhomocysteinase	Ahcy	-0.169655	0.144118
Elongation factor 1-alpha 2	Eef1a2	-0.52362	0.0494534
Protein transport protein Sec31A	Sec31a	0.128866	0.159162
Xaa-Pro aminopeptidase 1	Xpnpep1	-0.000980314	0.990255
Nuclear autoantigenic sperm protein	Nasp	-0.272756	0.0519698
Signal recognition particle receptor subunit alpha	Srpra	-0.226142	0.11793
Cytospin-B	Specc1	0.180726	0.145445
Zinc finger protein 638	Znf638	-0.0333943	0.816711
Eukaryotic translation initiation factor 3 subunit F	Eif3f	-0.100481	0.726489
Glutamate dehydrogenase 1, mitochondrial	Glud1	-0.0832939	0.360562
40S ribosomal protein S3	Rps3	-0.320287	0.037896
Far upstream element-binding protein 2	Khsrp	-0.114681	0.424407
Inactive tyrosine-protein kinase PEAK1	Peak1	0.0381894	0.787975
Engulfment and cell motility protein 1	Elmo1	0.192363	0.133349
Scaffold attachment factor B1	Safb	-0.084386	0.576547
Activating signal cointegrator 1 complex subunit 3	Ascc3	-0.063586	0.669427
ATP-binding cassette sub-family E member 1	Abce1	-0.0674744	0.551149
Condensin complex subunit 1	Ncapd2	-0.252036	0.163443
Heat shock protein 75 kDa, mitochondrial	Trap1	-0.210038	0.0602947
Eukaryotic translation initiation factor 3 subunit I	Eif3i	-0.139009	0.237038
Ubiquitin carboxyl-terminal hydrolase 25	Usp25	0.0669018	0.509261
Phosphatidylinositol-3-phosphatase SAC1	Sacm1l	-0.199553	0.140681
Cullin-3	Cul3	0.0576731	0.566601
GTPase-activating protein and VPS9 domain-containing protein 1	Gapvd1	0.154297	0.144522
RNA polymerase-associated protein CTR9 homolog	Ctr9	-0.160524	0.158129
SUMO-activating enzyme subunit 2	Uba2	-0.0992236	0.357239
Peroxisomal multifunctional enzyme type 2	Hsd17b4	-0.165074	0.292442
Annexin A7	Anxa7	0.361119	0.0225935
Rho-associated protein kinase 1	Rock1	0.126363	0.220961
General transcription factor II-I	Gtf2i	-0.129254	0.17285
Lupus La protein homolog	Ssb	-0.109262	0.406761
DNA mismatch repair protein Msh6	Msh6	-0.137441	0.219574
UMP-CMP kinase 2, mitochondrial	Cmpk2	0.157752	0.297471
Protein phosphatase 1 regulatory subunit 7	Ppp1r7	-0.0590411	0.578495
Pumilio homolog 3	Pum3	-0.0744736	0.469106
14-3-3 protein epsilon	Ywhae	-0.070857	0.623794
Peptidyl-prolyl cis-trans isomerase A	Ppia	-0.0100196	0.955117
Microtubule-associated protein 4	Map4	0.0164995	0.880082
Interferon-induced transmembrane protein 3	Ifitm3	-0.45702	0.0966133
Cathepsin B	Ctsb	-0.0399397	0.711389
ATP-dependent RNA helicase DDX42	Ddx42	-0.106354	0.270681
Importin-7	Ipo7	-0.204735	0.345524
26S proteasome regulatory subunit 6B	Psmc4	0.305135	0.0221648
V-type proton ATPase subunit B, brain isoform	Atp6v1b2	-0.0120133	0.940654
Thimet oligopeptidase	Thop1	0.0370539	0.755789
Protein Niban 2	Niban2	0.0904593	0.344651
Phosphoserine aminotransferase	Psat1	-0.081479	0.491552
ATP-binding cassette sub-family F member 2	Abcf2	-0.080171	0.43862
Formin-like protein 1	Fmnl1	-0.0814603	0.488025
26S proteasome non-ATPase regulatory subunit 13	Psmd13	0.185293	0.171458
Succinate--CoA ligase [GDP-forming] subunit beta, mitochondrial	Suclg2	-0.110783	0.28982
Heterogeneous nuclear ribonucleoprotein H	Hnrnph1	-0.105245	0.34376
Centrosome-associated protein CEP250	Cep250	0.47402	0.0302176
Transport and Golgi organization protein 1 homolog	Mia3	0.209616	0.149738
NFX1-type zinc finger-containing protein 1	Znfx1	0.022301	0.852564
Glutaminase kidney isoform, mitochondrial	Gls	-0.0886877	0.66075
Leukotriene A-4 hydrolase	Lta4h	-0.0976515	0.353481
Catenin delta-1	Ctnnd1	0.185496	0.133539
DNA topoisomerase 1	Top1	-0.164128	0.099826
Septin-9	Septin9	-0.0148236	0.900449
Nuclear pore membrane glycoprotein 210	Nup210	-0.304672	0.0407007
Centromere/kinetochore protein zw10 homolog	Zw10	0.195259	0.134773
Histone H4	H4f16	-0.458405	0.098086
Serpin B6	Serpinb6	0.347399	0.0334033
Zinc finger CCCH domain-containing protein 11A	Zc3h11a	0.0199973	0.85921
Aminopeptidase B	Rnpep	-0.00390666	0.9644
Sorting nexin-9	Snx9	-0.15046	0.118954
Far upstream element-binding protein 1	Fubp1	0.00467336	0.964071
Coiled-coil domain-containing protein 22	Ccdc22	0.102996	0.340771
ATP-dependent 6-phosphofructokinase, platelet type	Pfkp	-0.193193	0.0701559
Short-chain specific acyl-CoA dehydrogenase, mitochondrial	Acads	-0.038877	0.848743
Cullin-1	Cul1	0.00933224	0.951474
RNA helicase	Ddx23	-0.228659	0.0590837
Eukaryotic translation initiation factor 3 subunit E	Eif3e	-0.0513412	0.658209
Tyrosine-protein phosphatase non-receptor type 23	Ptpn23	0.208454	0.0971958
Sodium/potassium-transporting ATPase subunit alpha-2	Atp1a2	NA	NA
Eukaryotic peptide chain release factor GTP-binding subunit ERF3A	Gspt1	-0.157809	0.322076
Hexokinase-3	Hk3	0.494944	0.0167886
Phospholipase A-2-activating protein	Plaa	0.133541	0.165143
Ras GTPase-activating protein-binding protein 2	G3bp2	-0.0754418	0.61781
FACT complex subunit SSRP1	Ssrp1	-0.162021	0.262763
Zinc phosphodiesterase ELAC protein 2	Elac2	0.0414258	0.646306
Eukaryotic translation initiation factor 2 subunit 2	Eif2s2	0.111624	0.482395
Dolichyl-diphosphooligosaccharide--protein glycosyltransferase subunit 2	Rpn2	-0.224263	0.127172
Ubiquitin carboxyl-terminal hydrolase 24	Usp24	-0.083422	0.73319
UDP-N-acetylglucosamine--peptide N-acetylglucosaminyltransferase 110 kDa subunit	Ogt	-0.153086	0.209929
Carbonic anhydrase 2	Ca2	-0.326849	0.175735
Puromycin-sensitive aminopeptidase	Npepps	0.00298002	0.97156
Integrator complex subunit 1	Ints1	0.161004	0.193789
Pyridoxal-dependent decarboxylase domain-containing protein 1	Pdxdc1	0.0549816	0.59596
Ubiquitin-like modifier-activating enzyme ATG7	Atg7	0.0973275	0.297084
Poly(rC)-binding protein 1	Pcbp1	-0.119042	0.566601
Inositol 1,4,5-trisphosphate receptor type 3	Itpr3	0.00781563	0.950585
DNA mismatch repair protein Msh2	Msh2	-0.124545	0.239132
E3 ubiquitin-protein ligase BRE1A	Rnf20	0.361711	0.0416289
Arf-GAP with coiled-coil, ANK repeat and PH domain-containing protein 2	Acap2	0.0650773	0.541331
pre-rRNA 2'-O-ribose RNA methyltransferase FTSJ3	Ftsj3	0.0544344	0.571475
Integrin alpha-M	Itgam	0.322864	0.134382
WD repeat-containing protein 75	Wdr75	-0.105449	0.424337
Centrosomal protein of 170 kDa	Cep170	0.147816	0.157921
Glycine amidinotransferase, mitochondrial	Gatm	-0.249521	0.0917578
Ras GTPase-activating protein-binding protein 1	G3bp1	-0.210121	0.381887
U4/U6.U5 tri-snRNP-associated protein 1	Sart1	0.0141936	0.925459
Interferon-activable protein 204	Ifi204	0.0744526	0.731804
Peptidyl-prolyl cis-trans isomerase D	Ppid	0.0393114	0.736937
ATP-dependent RNA helicase DDX24	Ddx24	0.0136951	0.894082
Fructose-bisphosphate aldolase C	Aldoc	0.29388	0.0734836
ATP-dependent 6-phosphofructokinase, liver type	Pfkl	-0.252163	0.0868578
Apolipoprotein A-I	APOA1	NA	NA
40S ribosomal protein S4, X isoform	Rps4x	-0.384402	0.0993845
14-3-3 protein zeta/delta	Ywhaz	-0.0287385	0.870685
Inverted formin-2	Inf2	0.0246459	0.8515
Histidine--tRNA ligase, cytoplasmic	Hars1	0.0234264	0.848743
Eukaryotic initiation factor 4A-III	Eif4a3	-0.185008	0.118497
Sorting nexin-1	Snx1	0.0763993	0.370023
Prohibitin	Phb	-0.130598	0.219574
Signal recognition particle subunit SRP68	Srp68	0.158286	0.175725
Schlafen family member 5	Slfn5	-0.191651	0.449921
Beta-glucuronidase	Gusb	0.0664846	0.61373
BMS1 homolog, ribosome assembly protein (Yeast)	Bms1	-0.0275423	0.779341
RNA-binding protein 39	Rbm39	-0.0700523	0.69578
NADH dehydrogenase [ubiquinone] flavoprotein 1, mitochondrial	Ndufv1	-0.100478	0.500845
MORC family CW-type zinc finger protein 3	Morc3	-0.0789432	0.539755
Band 4.1-like protein 2	Epb41l2	-0.0227565	0.876434
Inosine-5'-monophosphate dehydrogenase 2	Impdh2	-0.258821	0.0632123
Aldehyde dehydrogenase, mitochondrial	Aldh2	0.0371712	0.875368
Nucleobindin-1	Nucb1	-0.0408029	0.756641
Protein LYRIC	Mtdh	-0.0571914	0.610189
Eukaryotic peptide chain release factor subunit 1	Etf1	-0.206048	0.209929
Protein phosphatase 1 regulatory subunit 12A	Ppp1r12a	0.248432	0.074577
Phosphoinositide 3-kinase adapter protein 1	Pik3ap1	0.400619	0.0127246
Apoptosis inhibitor 5	Api5	0.0297542	0.749446
Annexin A6	Anxa6	0.165433	0.140049
Macrophage-capping protein	Capg	-0.0423987	0.86646
Serine/threonine-protein phosphatase 2A catalytic subunit alpha isoform	Ppp2ca	0.0676795	0.509983
Phosphatidylinositol 3,4,5-trisphosphate 5-phosphatase 2	Inppl1	-0.024043	0.80636
Elongator complex protein 1	Elp1	0.0375909	0.768321
Histone acetyltransferase type B catalytic subunit	Hat1	-0.0602513	0.519374
GDP-mannose 4,6 dehydratase	Gmds	-0.142533	0.261353
DnaJ homolog subfamily C member 2	Dnajc2	0.00547761	0.967463
Dynamin-like 120 kDa protein, mitochondrial	Opa1	-0.260606	0.0600454
T-complex protein 1 subunit zeta	Cct6a	-0.0886107	0.401181
Vacuolar protein sorting-associated protein 11 homolog	Vps11	0.0437214	0.783367
Tuftelin-interacting protein 11	Tfip11	0.113968	0.3996
Transgelin-2	Tagln2	-0.114523	0.555175
DNA-directed RNA polymerase I subunit RPA1	Polr1a	-0.197914	0.263623
Aminopeptidase N	Anpep	0.060594	0.637487
Hsp90 co-chaperone Cdc37	Cdc37	0.0966073	0.520542
Chloride intracellular channel protein 1	Clic1	0.155747	0.165129
Annexin A4	Anxa4	0.217928	0.189068
Aspartyl/asparaginyl beta-hydroxylase	Asph	-0.247869	0.167971
NAD-dependent malic enzyme, mitochondrial	Me2	-0.341116	0.129158
Serine-threonine kinase receptor-associated protein	Strap	0.0124987	0.902553
Phosphatidylinositol 4-phosphate 3-kinase C2 domain-containing subunit alpha	Pik3c2a	-0.0280027	0.845148
Actin-like protein 6A	Actl6a	0.0309241	0.796065
Dynamin-1-like protein	Dnm1l	-0.153196	0.591461
Isocitrate dehydrogenase [NADP], mitochondrial	Idh2	0.0107066	0.934532
Nuclear pore complex protein Nup160	Nup160	-0.223604	0.103065
Phenylalanine--tRNA ligase alpha subunit	Farsa	0.135004	0.146328
SAFB-like transcription modulator	Sltm	-0.0793035	0.454939
Gasdermin-D	Gsdmd	0.113956	0.438597
Interferon-induced protein with tetratricopeptide repeats 3	Ifit3	0.101887	0.844523
Heterogeneous nuclear ribonucleoprotein Q	Syncrip	-0.038352	0.798232
V-type proton ATPase subunit H	Atp6v1h	0.730591	0.00483959
U4/U6 small nuclear ribonucleoprotein Prp31	Prpf31	-0.123617	0.490379
Protein Niban 1	Niban1	0.210306	0.0883361
DNA topoisomerase 2-beta	Top2b	-0.0487893	0.598713
Aspartate aminotransferase, cytoplasmic	Got1	-0.187782	0.3303
SUN domain-containing protein 2	Sun2	-0.253281	0.113493
E1 ubiquitin-activating enzyme	Uba7	0.194643	0.372638
Poly(U)-binding-splicing factor PUF60	Puf60	-0.218944	0.13842
Rabankyrin-5	Ankfy1	-0.139386	0.2963
Cytoskeleton-associated protein 4	Ckap4	-0.0202037	0.832332
ATP-dependent RNA helicase DHX30	Dhx30	-0.160301	0.236615
Neutrophil cytosol factor 2	Ncf2	0.467942	0.035305
Serine/threonine-protein phosphatase PP1-alpha catalytic subunit	Ppp1ca	-0.00714169	0.951553
ADP-ribosylation factor 1	Arf1	0.00492768	0.973412
D-glutamate cyclase, mitochondrial	Dglucy	0.256733	0.103206
Sorting nexin-2	Snx2	-0.0306914	0.803696
60S ribosomal protein L7	Rpl7	-0.459631	0.147137
WD repeat domain 36	Wdr36	0.0513249	0.679937
Nucleoporin 153	Nup153	-0.083524	0.71601
DNA polymerase alpha catalytic subunit	Pola1	-0.207769	0.0961536
CLIP-associating protein 2	Clasp2	-0.0505471	0.795394
Protein NDRG2	Ndrg2	0.0162483	0.855341
Pinin	Pnn	-0.0835755	0.586748
Transportin-1	Tnpo1	0.00239043	0.98369
Nuclear pore complex protein Nup133	Nup133	-0.279351	0.0625037
Pre-mRNA-processing factor 40 homolog A	Prpf40a	0.0719761	0.584432
Nucleolar pre-ribosomal-associated protein 1	Urb1	-0.277877	0.14143
RNA-binding protein 28	Rbm28	-0.0982181	0.333368
Pre-mRNA-processing factor 19	Prpf19	-0.21818	0.175993
Mitochondrial-processing peptidase subunit alpha	Pmpca	-0.146026	0.247068
Aldo-keto reductase family 1 member A1	Akr1a1	0.315999	0.0667744
Tryptophan--tRNA ligase, cytoplasmic	Wars1	0.195186	0.089473
Poly(rC)-binding protein 2	Pcbp2	-0.0228646	0.937475
Rab3 GTPase-activating protein non-catalytic subunit	Rab3gap2	-0.028813	0.802399
Beta-catenin-like protein 1	Ctnnbl1	-0.0619164	0.696799
H/ACA ribonucleoprotein complex subunit DKC1	Dkc1	-0.240691	0.0784664
Calcium-binding mitochondrial carrier protein Aralar2	Slc25a13	-0.184576	0.134773
Dynamin-2	Dnm2	0.32221	0.0314858
Proteasome activator complex subunit 1	Psme1	0.216333	0.0712347
Fatty acid-binding protein 5	Fabp5	-0.0355337	0.792622
Adenylosuccinate lyase	Adsl	-0.0493714	0.752639
E3 ubiquitin-protein ligase UHRF1	Uhrf1	-0.381026	0.0197523
EH domain-containing protein 1	Ehd1	0.118392	0.243437
Annexin A11	Anxa11	0.0489217	0.6806
Adenylosuccinate synthetase isozyme 2	Adss2	0.0455953	0.768737
Spermidine synthase	Srm	-0.219578	0.146462
Sphingosine-1-phosphate lyase 1	Sgpl1	0.148262	0.147131
Interferon-induced helicase C domain-containing protein 1	Ifih1	0.0460309	0.831326
Cell cycle and apoptosis regulator protein 2	Ccar2	-0.145376	0.258461
Heat shock 70 kDa protein 14	Hspa14	-0.0135449	0.908046
Oxygen-dependent coproporphyrinogen-III oxidase, mitochondrial	Cpox	-0.143742	0.541407
Integrin alpha-4	Itga4	-0.469321	0.0314788
Interferon-induced protein 44	Ifi44	0.226278	0.0632747
Dedicator of cytokinesis protein 8	Dock8	0.138537	0.298952
Phosphatidylinositol transfer protein alpha isoform	Pitpna	0.209974	0.169224
ATP-dependent RNA helicase DDX18	Ddx18	-0.171041	0.218585
3-ketoacyl-CoA thiolase A, peroxisomal	Acaa1a	-0.0684292	0.576547
NADP-dependent malic enzyme	Me1	-0.00889955	0.935197
WD repeat and HMG-box DNA-binding protein 1	Wdhd1	-0.16381	0.169224
Vasodilator-stimulated phosphoprotein	Vasp	0.0394939	0.738032
Wings apart-like protein homolog	Wapl	0.214634	0.117791
WD repeat- and FYVE domain-containing protein 4	Wdfy4	0.149198	0.204004
Prohibitin-2	Phb2	-0.251321	0.092126
Coronin-1A	Coro1a	-0.202393	0.0825814
Beta-hexosaminidase subunit beta	Hexb	0.0434077	0.772523
Pyruvate dehydrogenase E1 component subunit alpha, somatic form, mitochondrial	Pdha1	-0.297687	0.0302372
Guanine nucleotide-binding protein G(I)/G(S)/G(T) subunit beta-2	Gnb2	-0.0636621	0.596275
Caprin-1	Caprin1	-0.0432168	0.748298
Voltage-dependent anion-selective channel protein 2	Vdac2	-0.187303	0.114228
Histone-binding protein RBBP4	Rbbp4	-0.0409646	0.70161
U3 small nucleolar RNA-associated protein 14 homolog A	Utp14a	-0.128605	0.265038
Phosphate carrier protein, mitochondrial	Slc25a3	-0.259182	0.41462
RNA-splicing ligase RtcB homolog	Rtcb	0.0825502	0.479659
Actin-related protein 2/3 complex subunit 2	Arpc2	-0.0401057	0.748298
Endoplasmic reticulum transmembrane helix translocase	Atp13a1	-0.0191389	0.867177
RNA-binding protein 25	Rbm25	-0.0836646	0.545352
F-actin-capping protein subunit beta	Capzb	-0.0252697	0.855046
Nesprin-3	Syne3	-0.125105	0.286421
C-Jun-amino-terminal kinase-interacting protein 4	Spag9	0.215623	0.0972742
CD166 antigen	Alcam	-0.277539	0.0968824
Drebrin-like protein	Dbnl	0.123106	0.283418
Activator of 90 kDa heat shock protein ATPase homolog 1	Ahsa1	0.033721	0.699339
Deoxynucleotidyltransferase terminal-interacting protein 2	Dnttip2	0.127929	0.187911
AT-rich interactive domain-containing protein 1A	Arid1a	-0.0560422	0.731224
Ribonucleoside-diphosphate reductase large subunit	Rrm1	-0.288125	0.061673
Purine nucleoside phosphorylase	Pnp	-0.11951	0.388584
TP53-binding protein 1	Tp53bp1	0.0483008	0.779419
Echinoderm microtubule-associated protein-like 4	Eml4	-0.0705012	0.576533
Leucine-rich repeat-containing protein 40	Lrrc40	-0.102488	0.34477
Probable ATP-dependent RNA helicase DDX56	Ddx56	-0.0923193	0.719739
Inositol-3-phosphate synthase 1	Isyna1	-0.198811	0.423221
High mobility group nucleosome-binding domain-containing protein 5	Hmgn5	-0.0145214	0.958748
SUMO-activating enzyme subunit 1	Sae1	-0.0907675	0.353243
AP-3 complex subunit beta-1	Ap3b1	0.0414887	0.747957
Uridine 5'-monophosphate synthase	Umps	-0.290983	0.106837
Nicotinamide phosphoribosyltransferase	Nampt	-0.194069	0.075322
Glutaredoxin-3	Glrx3	-0.0725323	0.71856
Apoptosis-inducing factor 1, mitochondrial	Aifm1	-0.130727	0.261278
Activity-dependent neuroprotector homeobox protein	Adnp	-0.123643	0.319741
E3 ubiquitin/ISG15 ligase TRIM25	Trim25	0.206378	0.0623009
Serine/threonine-protein kinase VRK1	Vrk1	-0.165131	0.135678
Integrator complex subunit 13	IntS13	0.0294217	0.803857
Nucleolar GTP-binding protein 2	Gnl2	-0.00420967	0.982203
Pre-mRNA-splicing factor SYF1	Xab2	0.00787218	0.951553
Adenylate kinase 2, mitochondrial	Ak2	-0.195971	0.284187
Ubiquitin-protein ligase E3A	Ube3a	-0.419919	0.0563593
Serine/threonine-protein kinase WNK1	Wnk1	0.104708	0.352454
GPI transamidase component PIG-S	Pigs	-0.13993	0.499958
(E3-independent) E2 ubiquitin-conjugating enzyme UBE2O	Ube2o	0.363345	0.0462444
Splicing factor 3A subunit 3	Sf3a3	-0.166049	0.118967
Cap-specific mRNA (nucleoside-2'-O-)-methyltransferase 1	Cmtr1	0.0961022	0.544835
Integrin beta-2	Itgb2	0.45922	0.0180477
Alpha-taxilin	Txlna	0.144393	0.309445
Telomere-associated protein RIF1	Rif1	-0.233763	0.103018
Nuclear RNA export factor 7	Nxf7	-0.113675	0.501194
Cleavage and polyadenylation specificity factor subunit 2	Cpsf2	-0.0345748	0.733687
FK506-binding protein 15	Fkbp15	0.0863026	0.566601
Replication protein A 70 kDa DNA-binding subunit	Rpa1	-0.324943	0.0845507
Phosphoglycerate mutase 1	Pgam1	-0.170229	0.232955
Ubiquitin conjugation factor E4 B	Ube4b	0.0103122	0.931317
High mobility group protein B1	Hmgb1	-0.306875	0.196409
Chromodomain-helicase-DNA-binding protein 8	Chd8	0.221578	0.13842
Methionine aminopeptidase 2	Metap2	0.0918707	0.502776
Signal recognition particle 54 kDa protein	Srp54	0.384753	0.0216217
WASH complex subunit 4	Washc4	-0.00608239	0.965274
V-type proton ATPase subunit a	Tcirg1	0.036837	0.736937
Epidermal growth factor receptor substrate 15	Eps15	0.111699	0.48485
Anillin	Anln	-0.0115008	0.928999
Protein ERGIC-53	Lman1	-0.0441077	0.600972
GRIP and coiled-coil domain-containing protein 2	Gcc2	0.0720283	0.549419
4-alpha-glucanotransferase	Agl	0.0430372	0.74461
Lamin-B2	Lmnb2	-0.21835	0.161231
Procollagen-lysine,2-oxoglutarate 5-dioxygenase 1	Plod1	-0.35676	0.0216217
Cohesin subunit SA-2	Stag2	-0.108014	0.526686
Acetyl-CoA acetyltransferase, mitochondrial	Acat1	-0.0967638	0.340341
Chromosome-associated kinesin KIF4	Kif4	-0.12235	0.295324
60S ribosomal protein L10a	Rpl10a	-0.308342	0.0896257
Lymphocyte-specific helicase	Hells	-0.279197	0.147764
Protein phosphatase 1G	Ppm1g	-0.0440325	0.756641
Plasminogen activator inhibitor 1 RNA-binding protein	Serbp1	-0.127635	0.501194
Protein S100-A10	S100a10	-0.122712	0.853962
Cyclin-dependent kinase 11B	Cdk11b	-0.0421288	0.721347
Tyrosine-protein kinase Lyn	Lyn	-0.126607	0.263006
Cullin-4B	Cul4b	-0.0237086	0.838637
Oxysterol-binding protein-related protein 8	Osbpl8	0.0136668	0.949941
Alpha-2-HS-glycoprotein	AHSG	NA	NA
Cathepsin D	Ctsd	0.0524849	0.567689
Ribosomal protein S6 kinase alpha-1	Rps6ka1	0.205986	0.0868578
Nucleolar transcription factor 1	Ubtf	-0.250824	0.104352
Peroxiredoxin-1	Prdx1	0.0874916	0.642537
Tyrosine-protein kinase CSK	Csk	-0.0231541	0.865459
Hematopoietic lineage cell-specific protein	Hcls1	0.155049	0.151077
Very long-chain specific acyl-CoA dehydrogenase, mitochondrial	Acadvl	0.199333	0.229496
Proteasome activator complex subunit 3	Psme3	-0.0667668	0.416841
Rho-associated protein kinase 2	Rock2	0.0550128	0.600972
Neutrophil cytosol factor 4	Ncf4	0.209502	0.149738
Vacuolar protein sorting-associated protein 13A	Vps13a	0.0263126	0.796207
Shootin-1	Shtn1	0.102891	0.25949
Nucleolar protein 6	Nol6	-0.210437	0.517657
Ubiquitin-associated protein 2	Ubap2	-0.134302	0.222383
Tubulin beta-6 chain	Tubb6	-0.04902	0.842942
Stomatin-like protein 2, mitochondrial	Stoml2	-0.147108	0.325834
Cyclin-G-associated kinase	Gak	0.155149	0.326191
Putative RNA-binding protein Luc7-like 1	Luc7l	0.138262	0.17027
Glycine--tRNA ligase	Gars1	-0.0218712	0.880082
Ubiquitin carboxyl-terminal hydrolase isozyme L5	Uchl5	-0.00800177	0.92918
Targeting protein for Xklp2	Tpx2	-0.0189391	0.895274
Rho guanine nucleotide exchange factor 10-like protein	Arhgef10l	-0.0719728	0.669427
Calpain-2 catalytic subunit	Capn2	0.316548	0.117791
Lysosomal acid glucosylceramidase	Gba	0.0351161	0.81195
Alpha-mannosidase 2	Man2a1	-0.180642	0.328654
Ras-related protein Rab-7a	Rab7a	-0.0417156	0.655679
14-3-3 protein eta	Ywhah	0.0456095	0.747887
Phosphatidylethanolamine-binding protein 1	Pebp1	-0.0104188	0.916204
Disabled homolog 2	Dab2	-0.116185	0.345524
Nuclear fragile X mental retardation-interacting protein 2	Nufip2	-0.0828857	0.522448
Nischarin	Nisch	0.174353	0.297839
Sp110 nuclear body protein	Sp110	0.270974	0.0698495
Calcium homeostasis endoplasmic reticulum protein	Cherp	-0.135034	0.468661
Importin-4	Ipo4	0.0664203	0.682849
Cleavage and polyadenylation specificity factor subunit 3	Cpsf3	-0.126467	0.244054
Caspase-8	Casp8	0.102646	0.458734
Hypoxanthine-guanine phosphoribosyltransferase	Hprt1	0.0805847	0.549498
Keratin, type II cytoskeletal 1	KRT1	NA	NA
Tubulin--tyrosine ligase-like protein 12	Ttll12	-0.163231	0.333668
Polyadenylate-binding protein	Pabpc4	-0.202092	0.117791
Serine/threonine-protein phosphatase 2A 65 kDa regulatory subunit A beta isoform	Ppp2r1b	0.0825972	0.512052
RNA helicase	Dhx38	0.22098	0.252827
RNA-binding protein 14	Rbm14	-0.307047	0.333624
E3 UFM1-protein ligase 1	Ufl1	-0.0949131	0.451768
ATP-dependent RNA helicase DDX39A	Ddx39a	-0.225802	0.0758033
Cytosolic acyl coenzyme A thioester hydrolase	Acot7	0.131734	0.244634
U4/U6 small nuclear ribonucleoprotein Prp4	Prpf4	-0.182052	0.298475
V-type proton ATPase subunit C 1	Atp6v1c1	0.230131	0.0789898
Protein transport protein Sec16A	Sec16a	0.112247	0.453406
Sortilin-related receptor	Sorl1	-0.942761	0.00501179
40S ribosomal protein S6	Rps6	-0.144049	0.263209
La-related protein 7	Larp7	-0.11029	0.323048
E3 ubiquitin-protein ligase BRE1B	Rnf40	0.270024	0.0728896
Phosphatidylinositol 3,4,5-trisphosphate-dependent Rac exchanger 1 protein	Prex1	0.126124	0.328877
CLIP-associating protein 1	Clasp1	0.305102	0.075322
Formin-binding protein 1-like	Fnbp1l	-0.0938122	0.50768
Phenylalanine--tRNA ligase beta subunit	Farsb	0.00162289	0.98369
Inhibitor of nuclear factor kappa-B kinase subunit beta	Ikbkb	0.0804851	0.513405
40S ribosomal protein SA	Rpsa	-0.288192	0.0811997
Probable ATP-dependent RNA helicase DDX6	Ddx6	0.0302239	0.822636
Serine/threonine-protein phosphatase 5	Ppp5c	0.0109674	0.942319
Rho GDP-dissociation inhibitor 2	Arhgdib	0.0388432	0.788302
Tropomyosin alpha-4 chain	Tpm4	0.0090691	0.920486
WD repeat-containing protein 3	Wdr3	-0.0515805	0.715666
Proteasome subunit beta type-8	Psmb8	-0.362261	0.0474478
Actin-related protein 2	Actr2	0.0594845	0.742405
Cytosolic purine 5'-nucleotidase	Nt5c2	0.188655	0.209929
DmX-like protein 1	Dmxl1	-0.00925117	0.954324
Atlastin-3	Atl3	-0.0410496	0.76764
Nuclear RNA export factor 1	Nxf1	-0.179576	0.0838502
UMP-CMP kinase	Cmpk1	0.0762104	0.456693
Cofilin-1	Cfl1	-0.0247572	0.913077
Ornithine aminotransferase, mitochondrial	Oat	-0.41734	0.0507915
Elongation factor 1-delta	Eef1d	-0.0959177	0.578495
40S ribosomal protein S3a	Rps3a	-0.38467	0.0609328
NADH-cytochrome b5 reductase 3	Cyb5r3	0.0493929	0.669713
Acyl-coenzyme A thioesterase 9, mitochondrial	Acot9	0.0871645	0.597404
V-type proton ATPase subunit E 1	Atp6v1e1	0.251104	0.166466
Rho GTPase-activating protein 1	Arhgap1	0.0216706	0.90351
Fragile X mental retardation syndrome-related protein 1	Fxr1	0.192313	0.099826
CTTNBP2 N-terminal-like protein	Cttnbp2nl	0.182554	0.147764
Ribosomal biogenesis protein LAS1L	Las1l	-0.0947864	0.357398
Kinesin-like protein KIF11	Kif11	0.168303	0.335812
Formin-binding protein 1	Fnbp1	0.0634818	0.634728
Deubiquitinating protein VCPIP1	Vcpip1	0.181944	0.161231
Thioredoxin-like protein 1	Txnl1	0.038394	0.854459
RAS p21 protein activator 1	Rasa1	-0.316419	0.207691
Phosphatidylinositol-binding clathrin assembly protein	Picalm	-0.0963222	0.612323
Interferon-induced, double-stranded RNA-activated protein kinase	Eif2ak2	0.0212832	0.851534
ATP-dependent translocase ABCB1	Abcb1b	-0.284282	0.0966133
Testin	Tes	0.114488	0.325938
Serine/threonine-protein phosphatase 2A 56 kDa regulatory subunit	Ppp2r5d	0.0752807	0.606804
Integrator complex subunit 7	Ints7	0.0488026	0.689908
Solute carrier family 4 (anion exchanger), member 1, adaptor protein	Slc4a1ap	0.127929	0.427314
Dihydrolipoyl dehydrogenase, mitochondrial	Dld	-0.0688369	0.762874
DNA-directed RNA polymerase I subunit RPA2	Polr1b	-0.201019	0.203905
Beta-adrenergic receptor kinase 1	Grk2	-0.101491	0.43992
Signal transducer and activator of transcription 3	Stat3	0.161108	0.239202
Transcriptional regulator ATRX	Atrx	0.12382	0.329612
Transformation/transcription domain-associated protein	Trrap	0.196834	0.329518
Nuclear pore complex protein Nup54	Nup54	-0.109171	0.483509
Catenin alpha-1	Ctnna1	0.820327	0.00483959
Phosphatidylinositol 4-kinase alpha	Pi4ka	0.320063	0.0608703
Leucine-rich repeat flightless-interacting protein 1	Lrrfip1	0.222653	0.128024
RNA helicase aquarius	Aqr	-0.0306986	0.864331
Protein NDRG1	Ndrg1	-0.275363	0.0811997
RNA polymerase II-associated factor 1 homolog	Paf1	-0.0191367	0.868842
Heme oxygenase 2	Hmox2	-0.150366	0.468661
26S proteasome non-ATPase regulatory subunit 7	Psmd7	0.170855	0.156965
Recombining binding protein suppressor of hairless	Rbpj	-0.311312	0.0457642
Developmentally-regulated GTP-binding protein 1	Drg1	0.0539511	0.593949
Aldose reductase-related protein 2	Akr1b8	-0.199046	0.330181
40S ribosomal protein S15	Rps15	-0.262301	0.192848
ELAV-like protein 1	Elavl1	-0.209437	0.122562
Neutrophil cytosol factor 1	Ncf1	0.264124	0.0314858
S-adenosylmethionine synthase isoform type-2	Mat2a	-0.280002	0.11394
Ubiquitin carboxyl-terminal hydrolase 19	Usp19	0.683884	0.00483959
Double-strand-break repair protein rad21 homolog	Rad21	-0.0862538	0.482395
Phosphoenolpyruvate carboxykinase [GTP], mitochondrial	Pck2	-0.194196	0.241132
Transmembrane protein 214	Tmem214	-0.101384	0.367207
Serine/threonine-protein kinase TAO3	Taok3	0.0489993	0.733903
Ras-related protein Rab-14	Rab14	-0.132027	0.254353
Heterogeneous nuclear ribonucleoprotein L-like	Hnrnpll	-0.126473	0.184833
Probable 28S rRNA (cytosine-C(5))-methyltransferase	Nop2	-0.245458	0.128332
Cullin-5	Cul5	0.0289943	0.748298
Isocitrate dehydrogenase [NAD] subunit alpha, mitochondrial	Idh3a	-0.13332	0.258575
Actin-related protein 2/3 complex subunit 1B	Arpc1b	-0.0633225	0.441391
Eukaryotic translation initiation factor 2 subunit 3, Y-linked	Eif2s3y	-0.0847922	0.535515
Nucleolar and coiled-body phosphoprotein 1	Nolc1	-0.373463	0.0378958
Glucosidase 2 subunit beta	Prkcsh	0.0576128	0.546954
Macrophage migration inhibitory factor	Mif	-0.226206	0.547497
Profilin-1	Pfn1	0.0117297	0.959297
Sodium/potassium-transporting ATPase subunit beta-3	Atp1b3	-0.164522	0.204493
Transcription activator BRG1	Smarca4	0.084007	0.606591
Girdin	Ccdc88a	0.323275	0.132792
Sterol O-acyltransferase 1	Soat1	-0.0782082	0.386573
Isoleucine--tRNA ligase, mitochondrial	Iars2	-0.283208	0.0318112
RUN and FYVE domain-containing protein 1	Rufy1	-0.0278947	0.775225
Gem-associated protein 5	Gemin5	-0.00213583	0.983384
Nuclear pore complex protein Nup88	Nup88	-0.202083	0.459077
Importin-9	Ipo9	-0.0648936	0.71394
Vacuolar protein sorting-associated protein 16 homolog	Vps16	0.0937464	0.45479
Protein disulfide-isomerase A6	Pdia6	0.0128708	0.937475
Plastin-3	Pls3	0.246625	0.127755
Succinate dehydrogenase [ubiquinone] iron-sulfur subunit, mitochondrial	Sdhb	-0.126811	0.369357
ATP synthase subunit O, mitochondrial	Atp5po	-0.303557	0.243655
AMP deaminase 2	Ampd2	-0.0739558	0.504946
Unconventional myosin-Ic	Myo1c	-0.0692731	0.449116
Eukaryotic translation initiation factor 2B, subunit 3	Eif2b3	0.000965373	0.990894
Calpain-1 catalytic subunit	Capn1	0.11992	0.373836
Ataxin-2-like protein	Atxn2l	-0.12518	0.337243
3-ketoacyl-CoA thiolase, mitochondrial	Acaa2	-0.141732	0.399243
Alkyldihydroxyacetonephosphate synthase, peroxisomal	Agps	-0.101668	0.247215
Glycogen phosphorylase, brain form	Pygb	0.0263963	0.796954
Dedicator of cytokinesis protein 7	Dock7	0.108952	0.462891
Sorting nexin-4	Snx4	0.103167	0.241775
Histone deacetylase 1	Hdac1	-0.106723	0.241132
rRNA 2'-O-methyltransferase fibrillarin	Fbl	-0.253223	0.106477
Heterogeneous nuclear ribonucleoproteins C1/C2	Hnrnpc	-0.15867	0.180989
Serine/threonine-protein kinase PAK 1	Pak1	0.0230877	0.859881
Kinesin-like protein KIF2A	Kif2a	-0.0752004	0.445683
Alpha-1-antiproteinase	SERPINA1	NA	NA
Ubiquitin-conjugating enzyme E2 K	Ube2k	0.103509	0.427762
Nucleobindin-2	Nucb2	0.0756684	0.660172
Multifunctional procollagen lysine hydroxylase and glycosyltransferase LH3	Plod3	-0.13015	0.542849
Mitotic spindle assembly checkpoint protein MAD1	Mad1l1	0.0390791	0.743741
B-TFIID TATA-box-binding protein-associated factor 1	Btaf1	-0.128394	0.29093
Serine/threonine-protein phosphatase 4 regulatory subunit 2	Ppp4r2	0.107312	0.486971
Sister chromatid cohesion protein PDS5 homolog B	Pds5b	-0.140307	0.303627
WASH complex subunit 2	Washc2	0.393942	0.0590837
CYFIP-related Rac1 interactor B	Cyrib	0.121405	0.17669
Squamous cell carcinoma antigen recognized by T-cells 3	Sart3	-0.116874	0.423062
Non-SMC condensin I complex, subunit G	Ncapg	-0.222436	0.180389
Bromodomain adjacent to zinc finger domain protein 1A	Baz1a	-0.080858	0.612935
Nipped-B-like protein	Nipbl	-0.0207254	0.900449
Serine/threonine-protein phosphatase 2A 55 kDa regulatory subunit B alpha isoform	Ppp2r2a	0.0142239	0.914936
Kinesin light chain 1	Klc1	0.142035	0.235448
DNA ligase 3	Lig3	0.0781346	0.548837
Heterogeneous nuclear ribonucleoprotein F	Hnrnpf	-0.195378	0.286211
Complement C3	C3	NA	NA
Poly(A) polymerase alpha	Papola	-0.0227229	0.866305
tRNA (uracil-5-)-methyltransferase homolog A	Trmt2a	-0.211059	0.352399
Exportin-T	Xpot	0.0346595	0.811444
Probable ATP-dependent RNA helicase DDX20	Ddx20	-0.100015	0.535574
Maestro heat-like repeat family member 1	Mroh1	0.199709	0.413138
60S ribosomal protein L6	Rpl6	-0.321421	0.0558549
SLIT-ROBO Rho GTPase-activating protein 2	Srgap2	0.0570096	0.646306
Keratin, type I cytoskeletal 9	KRT9	NA	NA
55 kDa erythrocyte membrane protein	Mpp1	0.65949	0.0123066
Interferon-induced protein with tetratricopeptide repeats 1	Ifit1	-0.143958	0.316697
Protein argonaute-2	Ago2	-0.0789085	0.598413
NAD(P) transhydrogenase, mitochondrial	Nnt	-0.108907	0.614402
Protein SDA1 homolog	Sdad1	-0.295778	0.0553305
Guanine nucleotide-binding protein G(i) subunit alpha-2	Gnai2	0.0112213	0.917023
GEM-interacting protein	Gmip	0.0248504	0.853396
Eukaryotic translation initiation factor 2A	Eif2a	-0.0823012	0.358798
ATP-dependent RNA helicase DDX54	Ddx54	-0.192626	0.356996
Dipeptidyl peptidase 3	Dpp3	-0.0699954	0.530956
TBC1 domain family member 15	Tbc1d15	-0.0390278	0.822968
Toll-like receptor 7	Tlr7	-0.323362	0.0512079
CTP synthase 1	Ctps1	-0.121451	0.495933
Nuclear pore glycoprotein p62	Nup62	-0.0765838	0.483509
Fibronectin type-III domain-containing protein 3A	Fndc3a	0.0317792	0.7907
Mitochondrial proton/calcium exchanger protein	Letm1	-0.197295	0.189068
Keratin, type II cytoskeletal 2 epidermal	KRT2	NA	NA
THUMP domain-containing protein 1	Thumpd1	0.0575423	0.62722
Calumenin	Calu	-0.008755	0.962332
Dolichyl-diphosphooligosaccharide--protein glycosyltransferase 48 kDa subunit	Ddost	-0.161317	0.391534
Bystin	Bysl	-0.134069	0.172587
Striatin	Strn	-0.0126026	0.919945
Proteasome subunit alpha type-2	Psma2	-0.502062	0.0793696
2-oxoisovalerate dehydrogenase subunit alpha, mitochondrial	Bckdha	-0.0784708	0.577684
Endoplasmic reticulum resident protein 29	Erp29	-0.151302	0.364823
Synaptic vesicle membrane protein VAT-1 homolog	Vat1	0.123277	0.386117
Sphingomyelin phosphodiesterase 4	Smpd4	0.0696883	0.560091
Ribosomal L1 domain-containing protein 1	Rsl1d1	-0.266059	0.165582
Integrator complex subunit 4	Ints4	0.0518354	0.741678
Nucleolar protein 14	Nop14	0.137709	0.288828
RNA-binding protein 5	Rbm5	0.173853	0.287206
Deoxyribose-phosphate aldolase	Dera	-0.0327482	0.777545
Melanoma inhibitory activity protein 2	Mia2	0.171016	0.182225
Ras-related protein Rab-31	Rab31	-0.313624	0.207483
Sialic acid synthase	Nans	-0.0898647	0.486971
Cytochrome b-c1 complex subunit 1, mitochondrial	Uqcrc1	-0.262289	0.0780892
Mitochondrial import receptor subunit TOM70	Tomm70	-0.225395	0.16598
Pyruvate dehydrogenase E1 component subunit beta, mitochondrial	Pdhb	-0.214904	0.131136
Sorting nexin-5	Snx5	0.04366	0.732056
AP-2 complex subunit beta	Ap2b1	-0.126404	0.510682
Pleckstrin	Plek	0.133421	0.338314
Developmentally-regulated GTP-binding protein 2	Drg2	0.0105753	0.956407
Unconventional myosin-IXb	Myo9b	0.053029	0.604944
Vacuolar protein sorting-associated protein 29	Vps29	-0.0813726	0.804833
RNA-binding motif protein, X chromosome	Rbmx	-0.360809	0.170943
Proteasome subunit alpha type-5	Psma5	-0.0426859	0.729134
FYN-binding protein 1	Fyb1	0.234767	0.0768515
60S ribosomal protein L7a	Rpl7a	-0.260001	0.0956931
Xaa-Pro dipeptidase	Pepd	0.224717	0.0642046
Elongation factor-like GTPase 1	Efl1	-0.0232117	0.876879
AFG3-like protein 2	Afg3l2	-0.0498307	0.66075
Vacuolar protein sorting-associated protein 18 homolog	Vps18	0.260084	0.0811997
Glyoxalase domain-containing protein 4	Glod4	-0.00235596	0.985709
Inorganic pyrophosphatase	Ppa1	-0.0407403	0.793176
Multifunctional protein ADE2	Paics	-0.0785524	0.553375
Mitotic checkpoint protein BUB3	Bub3	0.0437171	0.763181
COP9 signalosome complex subunit 4	Cops4	0.0567297	0.495674
Phosphatidylinositol transfer protein beta isoform	Pitpnb	0.101922	0.257452
Protein misato homolog 1	Msto1	-0.0813572	0.506997
Transportin-3	Tnpo3	-0.0609148	0.754405
Tubulin-specific chaperone D	Tbcd	0.0170017	0.917023
Complex I assembly factor ACAD9, mitochondrial	Acad9	-0.0262996	0.845391
Eukaryotic translation initiation factor 3 subunit H	Eif3h	0.0240805	0.826024
39S ribosomal protein L37, mitochondrial	Mrpl37	-0.204417	0.162943
Eukaryotic translation initiation factor 3 subunit M	Eif3m	-0.0980428	0.606669
5'-3' exoribonuclease 2	Xrn2	-0.29986	0.109037
Protein Red	Ik	0.289124	0.0838502
Proto-oncogene vav	Vav1	0.0520625	0.569375
Tyrosine-protein kinase SYK	Syk	0.418477	0.0301237
Nuclear export mediator factor Nemf	Nemf	0.0939503	0.413046
Serine/threonine-protein kinase Nek9	Nek9	0.0822201	0.514952
Leucine zipper protein 1	Luzp1	-0.0955173	0.416158
Core histone macro-H2A.1	Macroh2a1	-0.16166	0.451854
Mitochondrial import inner membrane translocase subunit TIM44	Timm44	-0.172945	0.134699
Sterol carrier protein 2	Scp2	-0.101183	0.774087
AP-2 complex subunit mu	Ap2m1	0.13023	0.563938
Ubiquitin-associated protein 2-like	Ubap2l	-0.0530092	0.642564
Transcription elongation factor A protein 1	Tcea1	0.169166	0.193881
Vacuolar protein sorting-associated protein 4B	Vps4b	0.337088	0.0776559
Ubiquitin recognition factor in ER-associated degradation protein 1	Ufd1	0.576776	0.0846984
Vacuolar protein sorting-associated protein 41 homolog	Vps41	0.197795	0.190454
E3 ubiquitin-protein ligase listerin	Ltn1	-0.0162508	0.882249
Tight junction protein ZO-2	Tjp2	0.080489	0.608484
Tyrosine-protein kinase BTK	Btk	0.134954	0.283109
ATP-dependent RNA helicase DDX19A;RNA helicase	Ddx19a;Ddx19b	-0.0348357	0.699339
Transmembrane glycoprotein NMB	Gpnmb	0.285715	0.0838502
N-acetylneuraminate lyase	Npl	0.0454362	0.82534
[Protein ADP-ribosylarginine] hydrolase	Adprh	0.122256	0.346315
COP9 signalosome complex subunit 2	Cops2	-0.0270564	0.882249
RNA-binding protein 15	Rbm15	-0.256176	0.186757
Cleavage stimulation factor subunit 2	Cstf2	-0.0867146	0.425389
U3 small nucleolar RNA-associated protein 25 homolog	Utp25	0.0834543	0.506162
Sodium bicarbonate cotransporter 3	Slc4a7	-0.440181	0.0956931
Protein phosphatase methylesterase 1	Ppme1	0.272237	0.043989
WD repeat-containing protein 11	Wdr11	0.0514249	0.66489
NADH dehydrogenase [ubiquinone] iron-sulfur protein 2, mitochondrial	Ndufs2	-0.160686	0.207107
Pleiotropic regulator 1	Plrg1	-0.0589035	0.571475
Rho GDP-dissociation inhibitor 1	Arhgdia	0.0473715	0.659783
DNA polymerase delta catalytic subunit	Pold1	-0.128496	0.207691
E3 ubiquitin-protein ligase CHIP	Stub1	-0.146808	0.264099
Cullin-4A	Cul4a	0.151853	0.226728
Transcriptional repressor p66 alpha	Gatad2a	0.0929424	0.501194
Replication factor C subunit 2	Rfc2	-0.155583	0.116297
Long-chain specific acyl-CoA dehydrogenase, mitochondrial	Acadl	0.198035	0.164183
Protein PRRC2A	Prrc2a	0.00335166	0.983802
Interleukin enhancer-binding factor 2	Ilf2	-0.0967205	0.373615
Exocyst complex component 4	Exoc4	0.50223	0.061673
60S ribosomal protein L8	Rpl8	-0.178103	0.242432
Proteasome subunit beta type-4	Psmb4	-0.413459	0.0149973
Acetoacetyl-CoA synthetase	Aacs	0.105816	0.360879
Probable JmjC domain-containing histone demethylation protein 2C	Jmjd1c	0.118567	0.39814
Alpha-2-macroglobulin receptor-associated protein	Lrpap1	0.162301	0.248232
Gephyrin	Gphn	0.0151523	0.919831
Proteasome subunit alpha type-7	Psma7	-0.348229	0.0172533
Signal transducing adapter molecule 2	Stam2	0.251361	0.131136
Cell growth-regulating nucleolar protein	Lyar	-0.365946	0.0583068
LIM and SH3 domain protein 1	Lasp1	0.135749	0.223904
Sequestosome-1	Sqstm1	0.410031	0.0311199
THO complex subunit 5 homolog	Thoc5	-0.0828357	0.419808
Calcium-binding mitochondrial carrier protein SCaMC-1	Slc25a24	-0.165565	0.448871
Treacle protein	Tcof1	-0.163551	0.108712
Keratin, type II cytoskeletal 6A	KRT6A	NA	NA
Tripartite motif-containing protein 14	Trim14	-0.205919	0.403056
OTU domain-containing protein 4	Otud4	0.0384169	0.782317
Peroxiredoxin-6	Prdx6	0.116316	0.659185
Annexin A3	Anxa3	0.175054	0.200626
Kinesin light chain 2	Klc2	0.154104	0.28261
Calpain small subunit 1	Capns1	0.332402	0.0571779
Zinc finger RNA-binding protein	Zfr	-0.0383937	0.695664
Protein lin-7 homolog C	Lin7c	-0.063227	0.701975
Integrin beta-1	Itgb1	-0.0426732	0.725121
AP-1 complex subunit gamma-1	Ap1g1	0.0716833	0.461234
40S ribosomal protein S2	Rps2	-0.37145	0.143479
Ras-related protein Rab-5C	Rab5c	-0.0580532	0.612323
Tyrosine-protein phosphatase non-receptor type 12	Ptpn12	0.0552046	0.682849
F-actin-capping protein subunit alpha-1	Capza1	0.0328451	0.876434
UV excision repair protein RAD23 homolog B	Rad23b	-0.0171636	0.878351
Small nuclear ribonucleoprotein Sm D2	Snrpd2	-0.132318	0.254924
Translationally-controlled tumor protein	Tpt1	-0.442921	0.0558654
Mitogen-activated protein kinase 1	Mapk1	0.226252	0.0966133
Eukaryotic translation initiation factor 5A-1	Eif5a	0.013542	0.92631
Casein kinase II subunit beta	Csnk2b	0.0620543	0.566601
Tubulin beta-4B chain	Tubb4b	-0.0950399	0.756641
Glutamate--cysteine ligase catalytic subunit	Gclc	-0.0962235	0.356512
U4/U6.U5 tri-snRNP-associated protein 2	Usp39	-0.206583	0.193044
Nucleolar protein 10	Nol10	-0.111043	0.473647
Prolyl 4-hydroxylase subunit alpha-1	P4ha1	-0.176877	0.16972
SEC23-interacting protein	Sec23ip	0.0879035	0.40713
RNA-binding protein 26	Rbm26	0.00934757	0.92608
Nucleoporin NUP188	Nup188	-0.122473	0.460924
ATP-dependent RNA helicase SUPV3L1, mitochondrial	Supv3l1	-0.249235	0.0663255
Scaffold attachment factor B2	Safb2	-0.0157986	0.890259
Sorting and assembly machinery component 50 homolog	Samm50	-0.20116	0.306443
VPS35 endosomal protein-sorting factor-like	Vps35l	0.149791	0.207483
Histone PARylation factor 1	Hpf1	-0.0978677	0.521095
PDZ and LIM domain protein 5	Pdlim5	0.0371396	0.810703
Pleckstrin homology domain-containing family O member 2	Plekho2	0.0865122	0.365372
Procollagen galactosyltransferase 1	Colgalt1	-0.130744	0.32228
Transaldolase	Taldo1	0.346747	0.0528882
Leupaxin	Lpxn	0.142906	0.309287
E3 ubiquitin-protein ligase TRIM33	Trim33	-0.0809256	0.371366
Ras-related protein Rab-5A	Rab5a	-0.0272588	0.849601
14-3-3 protein beta/alpha	Ywhab	-0.0479859	0.633167
SNW domain-containing protein 1	Snw1	-0.0211847	0.898194
Ribonucleoprotein PTB-binding 1	Raver1	-0.0309488	0.878241
BRCA2 and CDKN1A-interacting protein	Bccip	0.0147342	0.897935
Protein SGT1 homolog	Sugt1	0.0915803	0.29712
Calcyclin-binding protein	Cacybp	0.171468	0.144118
Mitochondrial import receptor subunit TOM34	Tomm34	0.0510132	0.75153
Transmembrane emp24 domain-containing protein 10	Tmed10	-0.0376931	0.818513
Cleavage and polyadenylation specificity factor subunit 1	Cpsf1	-0.0536655	0.774195
Pescadillo homolog	Pes1	-0.082403	0.507729
Protein O-GlcNAcase	Oga	0.295032	0.173208
Geranylgeranyl transferase type-2 subunit alpha	Rabggta	-0.0216702	0.854778
ATP-dependent Clp protease ATP-binding subunit clpX-like, mitochondrial	Clpx	-0.178907	0.268038
S-formylglutathione hydrolase	Esd	0.194065	0.092126
Regulator of nonsense transcripts 2	Upf2	0.102442	0.346573
A-kinase anchor protein 13	Akap13	0.146382	0.624326
Multidrug resistance-associated protein 1	Abcc1	-0.129286	0.472199
14-3-3 protein gamma	Ywhag	-0.0280887	0.832769
14-3-3 protein theta	Ywhaq	0.028773	0.784652
Far upstream element (FUSE)-binding protein 3	Fubp3	-0.0487772	0.612323
U3 small nucleolar RNA-associated protein 18 homolog	Utp18	-0.205116	0.174978
Voltage-dependent anion-selective channel protein 1	Vdac1	-0.286533	0.146627
Protein VAC14 homolog	Vac14	0.021479	0.877752
Phostensin	Ppp1r18	0.0190737	0.899221
Dedicator of cytokinesis protein 10	Dock10	0.240703	0.214186
Cleft lip and palate transmembrane protein 1 homolog	Clptm1	-0.0543133	0.603245
Nicalin	Ncln	-0.157881	0.137127
Ribosomal RNA processing protein 1 homolog B	Rrp1b	-0.319645	0.071265
Acid ceramidase	Asah1	0.127669	0.535515
Protein kinase C and casein kinase substrate in neurons protein 2	Pacsin2	0.0751965	0.500539
Glucosamine-6-phosphate isomerase 1	Gnpda1	-0.0258732	0.866321
ATP-dependent zinc metalloprotease YME1L1	Yme1l1	-0.412942	0.0262913
Superoxide dismutase [Mn], mitochondrial	Sod2	0.180527	0.381751
Anaphase-promoting complex subunit 1	Anapc1	-0.0505338	0.827207
Ubiquitin-40S ribosomal protein S27a	Rps27a	0.540737	0.0609328
Ribosome biogenesis protein BOP1	Bop1	-0.113814	0.202522
Leucine-rich repeat-containing protein 47	Lrrc47	0.0275557	0.855341
Ubiquitin-like protein ISG15	Isg15	0.21062	0.215663
Protein scribble homolog	Scrib	-0.105547	0.436859
ER membrane protein complex subunit 1	Emc1	0.0270442	0.849501
DNA-directed RNA polymerase II subunit RPB2	Polr2b	-0.138674	0.221289
Fatty acyl-CoA reductase 1	Far1	-0.126715	0.424766
Signal-transducing adaptor protein 1	Stap1	-0.132289	0.236564
Septin-6	Septin6	-0.0724511	0.447624
Cysteine desulfurase, mitochondrial	Nfs1	-0.188886	0.0873788
Macrophage-expressed gene 1 protein	Mpeg1	-0.392169	0.0989977
Kinesin-like protein	Kifc5b	0.032179	0.748373
AP-2 complex subunit alpha-2	Ap2a2	-0.217307	0.20188
AP-1 complex subunit mu-1	Ap1m1	-0.124122	0.548153
Lipoamide acyltransferase component of branched-chain alpha-keto acid dehydrogenase complex, mitochondrial	Dbt	-0.302785	0.260565
Mortality factor 4-like protein 1	Morf4l1	0.521742	0.0167245
Arsenite methyltransferase	As3mt	0.167873	0.174437
28S ribosomal protein S22, mitochondrial	Mrps22	-0.172639	0.0970547
Ribosome biogenesis protein WDR12	Wdr12	-0.0413469	0.648545
THUMP domain-containing protein 3	Thumpd3	-0.0760131	0.472897
WD repeat-containing protein 70	Wdr70	0.103394	0.501194
E3 ubiquitin-protein ligase DTX3L	Dtx3l	0.0480222	0.830852
Protein PML	Pml	-0.134817	0.25949
Docking protein 3	Dok3	0.506086	0.0167245
FYVE, RhoGEF and PH domain-containing protein 3	Fgd3	0.142182	0.357239
Importin subunit alpha-1	Kpna2	0.189415	0.431036
Serine/threonine-protein phosphatase 4 regulatory subunit 3A	Ppp4r3a	-0.169904	0.149738
Rho GTPase-activating protein 25	Arhgap25	-0.0409536	0.700339
Chromosome alignment-maintaining phosphoprotein 1	Champ1	-0.0190713	0.876434
Omega-amidase NIT2	Nit2	-0.00902656	0.949867
26S proteasome non-ATPase regulatory subunit 14	Psmd14	0.14633	0.295505
B-cell receptor-associated protein 31	Bcap31	0.0301632	0.81195
Protein polybromo-1	Pbrm1	-0.0982452	0.325834
WD repeat-containing protein 18	Wdr18	-0.0774526	0.440298
N-alpha-acetyltransferase 25, NatB auxiliary subunit	Naa25	-0.0336056	0.830122
ARF GTPase-activating protein GIT2	Git2	0.120473	0.256568
Peptidyl-prolyl cis-trans isomerase B	Ppib	-0.251054	0.0623009
Rab GDP dissociation inhibitor alpha	Gdi1	0.143489	0.256544
Tensin-3	Tns3	0.202474	0.156197
Protein ELYS	Ahctf1	0.0822013	0.546444
Inter-alpha-trypsin inhibitor heavy chain H3	ITIH3	NA	NA
Y-box-binding protein 1	Ybx1	-0.304605	0.0262913
Translocon-associated protein subunit delta	Ssr4	-0.325337	0.112577
Nuclear pore complex protein Nup107	Nup107	-0.233466	0.0625037
Bleomycin hydrolase	Blmh	0.0241436	0.911963
RNA polymerase-associated protein RTF1 homolog	Rtf1	0.244168	0.103065
N-myc-interactor	Nmi	0.145924	0.451345
DDB1- and CUL4-associated factor 13	Dcaf13	-0.0994841	0.291912
Torsin-3A	Tor3a	-0.214615	0.1439
4F2 cell-surface antigen heavy chain	Slc3a2	-0.00936531	0.947161
Lamina-associated polypeptide 2, isoforms alpha/zeta	Tmpo	-0.301148	0.075322
Putative RNA-binding protein Luc7-like 2	Luc7l2	-0.107513	0.436521
Eukaryotic translation initiation factor 4B	Eif4b	-0.214679	0.125131
Paxillin	Pxn	0.120223	0.364909
4-trimethylaminobutyraldehyde dehydrogenase	Aldh9a1	-0.0490695	0.842723
Heat shock 70 kDa protein 1B;Heat shock 70 kDa protein 1A	Hspa1b;Hspa1a	0.655625	0.00772867
Beta-enolase	Eno3	0.0920004	0.560995
DEAH (Asp-Glu-Ala-His) box polypeptide 37	Dhx37	-0.192408	0.243099
Protein bicaudal D homolog 2	Bicd2	0.0486987	0.669427
40S ribosomal protein S17	Rps17	-0.284133	0.194174
U4/U6 small nuclear ribonucleoprotein Prp3	Prpf3	-0.0878098	0.318411
Heterogeneous nuclear ribonucleoprotein A/B	Hnrnpab	-0.345327	0.194755
Ferritin light chain 1	Ftl1	0.474414	0.0280852
MAP kinase-activated protein kinase 2	Mapkapk2	-0.0034805	0.978588
Golgi-specific brefeldin A-resistance factor 1	Gbf1	0.0877409	0.504325
2'-5' oligoadenylate synthase	Oas1g	-0.155544	0.35231
Mitotic checkpoint serine/threonine-protein kinase BUB1 beta	Bub1b	0.268324	0.106736
X-ray repair cross-complementing protein 6	Xrcc6	-0.0452667	0.649494
Nuclear factor NF-kappa-B p105 subunit	Nfkb1	0.0461679	0.722251
Extended synaptotagmin-1	Esyt1	0.0489606	0.671378
Guanylate-binding protein 4	Gbp4	-0.288017	0.413601
Translocation protein SEC63 homolog	Sec63	-0.19479	0.456693
Opioid growth factor receptor	Ogfr	-0.0567532	0.606784
Coatomer subunit gamma-2	Copg2	0.0333548	0.773517
Nuclear receptor coactivator 5	Ncoa5	-0.263082	0.148366
40S ribosomal protein S7	Rps7	-0.408134	0.160911
Tax1-binding protein 1 homolog	Tax1bp1	0.68571	0.0127246
Pseudouridylate synthase 7 homolog	Pus7	-0.149999	0.571026
Serine/threonine-protein kinase 10	Stk10	0.21307	0.0993845
Elongation factor 1-beta	Eef1b	-0.188063	0.16146
Very-long-chain 3-oxoacyl-CoA reductase	Hsd17b12	-0.175274	0.419222
Alpha-N-acetylglucosaminidase	Naglu	-0.00715567	0.967273
Keratin, type I cytoskeletal 10	KRT10	NA	NA
Protein-L-isoaspartate(D-aspartate) O-methyltransferase	Pcmt1	0.173396	0.131644
Splicing factor U2AF 65 kDa subunit	U2af2	-0.214722	0.128465
Acid sphingomyelinase-like phosphodiesterase 3b	Smpdl3b	-0.220772	0.0759721
Histidine triad nucleotide-binding protein 1	Hint1	0.12238	0.584432
N-acylglucosamine 2-epimerase	Renbp	0.187847	0.36821
Paired amphipathic helix protein Sin3a	Sin3a	-0.143839	0.204673
Heterogeneous nuclear ribonucleoprotein D0	Hnrnpd	-0.277146	0.222551
Zinc finger protein ZPR1	Zpr1	-0.0272046	0.812131
Protein disulfide-isomerase TMX3	Tmx3	-0.0136618	0.893727
Trafficking protein particle complex subunit 12	Trappc12	0.190355	0.190502
Nuclear pore complex protein Nup85	Nup85	-0.301722	0.0604683
Beta-centractin	Actr1b	0.0662481	0.717726
Huntingtin-interacting protein 1	Hip1	-0.199286	0.217429
Aminoacylase-1	Acy1	0.0439109	0.72404
RNA transcription, translation and transport factor protein	RTRAF	-0.0734001	0.52336
Serine/arginine-rich splicing factor 9	Srsf9	-0.177354	0.300513
Dihydrolipoyllysine-residue succinyltransferase component of 2-oxoglutarate dehydrogenase complex, mitochondrial	Dlst	-0.0289934	0.869367
NADH dehydrogenase [ubiquinone] iron-sulfur protein 3, mitochondrial	Ndufs3	-0.155196	0.187484
Acylglycerol kinase, mitochondrial	Agk	-0.123035	0.542528
Tropomodulin-3	Tmod3	0.132501	0.219683
Serine/threonine-protein kinase 3	Stk3	0.266039	0.138075
Vesicle-associated membrane protein-associated protein B	Vapb	-0.211663	0.0961536
DnaJ homolog subfamily B member 12	Dnajb12	0.196922	0.231295
Succinate--CoA ligase [ADP-forming] subunit beta, mitochondrial	Sucla2	-0.0824862	0.5714
Tetratricopeptide repeat domain 37	Ttc37	0.0966256	0.487157
Histone H2B type 1-M;Histone H2B type 1-H;Histone H2B type 2-B;Histone H2B type 1-C/E/G	H2bc14;H2bc9;Hist2h2bb;H2bc8	-0.5388	0.242516
Galectin-3	Lgals3	0.060009	0.83743
Serine hydroxymethyltransferase, cytosolic	Shmt1	-0.2382	0.143351
Aldehyde dehydrogenase family 16 member A1	Aldh16a1	-0.10399	0.235141
Transcription termination factor 2	Ttf2	0.0810246	0.611953
Active breakpoint cluster region-related protein	Abr	0.267938	0.136425
Peptidyl-prolyl cis-trans isomerase FKBP3	Fkbp3	-0.0849266	0.593949
Peptidyl-prolyl cis-trans isomerase FKBP5	Fkbp5	-0.173859	0.133291
Erlin-2	Erlin2	-0.136202	0.244586
Armadillo repeat-containing protein 6	Armc6	-0.00298478	0.982365
von Willebrand factor A domain-containing protein 8	Vwa8	-0.0680257	0.535515
Vam6/Vps39-like protein	Vps39	0.111486	0.328813
Argininosuccinate lyase	Asl	0.190602	0.0846984
Citrate synthase, mitochondrial	Cs	-0.104095	0.263623
39S ribosomal protein L45, mitochondrial	Mrpl45	-0.277259	0.037896
DnaJ homolog subfamily C member 10	Dnajc10	-0.248397	0.119006
Golgin subfamily A member 5	Golga5	0.016243	0.874845
Transducin beta-like protein 2	Tbl2	-0.411208	0.0372083
Pericentriolar material 1 protein	Pcm1	0.477382	0.0816539
Coronin-1C	Coro1c	-0.0832023	0.343362
Sec24-related gene family, member C (S. cerevisiae)	Sec24c	-0.0563197	0.8393
Casein kinase II subunit alpha'	Csnk2a2	0.0840302	0.354172
Septin-7	Septin7	0.0608484	0.469754
Crooked neck-like protein 1	Crnkl1	0.211546	0.092878
E3 ubiquitin-protein ligase RBBP6	Rbbp6	0.071818	0.548153
Proteasome activator complex subunit 4	Psme4	0.159514	0.493826
Nucleosome assembly protein 1-like 4	Nap1l4	-0.099033	0.371879
ERO1-like protein alpha	Ero1a	-0.094346	0.494157
Leucine-rich repeat-containing protein 59	Lrrc59	0.104477	0.252827
Ran-binding protein 3	Ranbp3	-0.136194	0.565922
Peptidyl-prolyl cis-trans isomerase NIMA-interacting 4	Pin4	-0.0256608	0.863744
General transcription factor IIE subunit 1	Gtf2e1	0.0863029	0.600972
1,4-alpha-glucan-branching enzyme	Gbe1	0.0709399	0.536592
28S ribosomal protein S29, mitochondrial	Dap3	-0.363881	0.061673
DENN domain-containing protein 4C	Dennd4c	0.231899	0.0811997
Protein IMPACT	Impact	1.24716	0.00188841
Pericentrin	Pcnt	0.153559	0.406761
Eukaryotic translation initiation factor 3 subunit J-A	Eif3j1	0.00102031	0.993909
RNA-binding protein 27	Rbm27	0.119631	0.375222
Epidermal growth factor receptor substrate 15-like 1	Eps15l1	0.0473808	0.744678
Sepiapterin reductase	Spr	-0.0815177	0.774198
Coiled-coil and C2 domain-containing protein 1B	Cc2d1b	0.000775399	0.993363
Probable ATP-dependent RNA helicase DDX47	Ddx47	-0.0987154	0.435504
Exportin-7	Xpo7	0.0117443	0.934532
YLP motif-containing protein 1	Ylpm1	-0.0208288	0.862688
SH3 and PX domain-containing protein 2B	Sh3pxd2b	0.16937	0.164867
Synaptosomal-associated protein 23	Snap23	0.13962	0.379256
Plasminogen	PLG	NA	NA
Caspase-1	Casp1	0.967477	0.00255585
Growth arrest-specific protein 7	Gas7	0.381919	0.0163887
Sodium/potassium-transporting ATPase subunit alpha-3	Atp1a3	0.00652031	0.967668
Tudor and KH domain-containing protein	Tdrkh	0.0154134	0.92234
Nucleolar protein 9	Nop9	-0.151354	0.268038
Ubiquitin carboxyl-terminal hydrolase 47	Usp47	0.222647	0.229496
mRNA export factor	Rae1	0.11544	0.243655
Guanine nucleotide exchange factor for Rab-3A	Rab3il1	-0.0104094	0.947009
Farnesyl pyrophosphate synthase	Fdps	-0.158693	0.185554
Electron transfer flavoprotein subunit alpha, mitochondrial	Etfa	-0.122378	0.283418
Tropomyosin 3, related sequence 7	Tpm3-rs7	0.0322781	0.87006
Chromodomain-helicase-DNA-binding protein 1	Chd1	-0.120758	0.346573
Calpastatin	Cast	0.329529	0.139939
Ras-related protein Rab-2A	Rab2a	0.003676	0.980197
Aladin	Aaas	-0.334462	0.232955
60S ribosomal protein L10	Rpl10	-0.247203	0.113493
Cytochrome P450 20A1	Cyp20a1	-0.219869	0.237934
Microtubule-associated protein 1S	Map1s	-0.0456951	0.745212
Interferon-induced protein 44-like	Ifi44l	0.250928	0.127172
Protein AATF	Aatf	0.0856272	0.642537
Trafficking protein particle complex subunit 11	Trappc11	0.268389	0.109037
FRY-like transcription coactivator	Fryl	0.151856	0.354741
E3 ubiquitin-protein ligase UBR2	Ubr2	0.449723	0.0231198
Sec1 family domain-containing protein 1	Scfd1	-0.0473534	0.715666
Cytoplasmic dynein 1 light intermediate chain 1	Dync1li1	0.228213	0.0571779
Methionine adenosyltransferase 2 subunit beta	Mat2b	0.0650991	0.607484
Phosphatidylinositol 4-kinase type 2-alpha	Pi4k2a	0.0947723	0.675478
Replication factor C subunit 1	Rfc1	-0.13343	0.280123
Pre-rRNA-processing protein TSR1 homolog	Tsr1	-0.0614788	0.591321
Serine/threonine-protein kinase OSR1	Oxsr1	-0.00740042	0.954739
TBC1 domain family member 5	Tbc1d5	0.129582	0.304202
Golgi resident protein GCP60	Acbd3	-0.051411	0.726599
Liprin-beta-1	Ppfibp1	-0.0818642	0.433349
Zinc finger CCCH domain-containing protein 13	Zc3h13	-0.00434207	0.975506
Signal-induced proliferation-associated protein 1	Sipa1	0.0369641	0.763153
Prostaglandin G/H synthase 2	Ptgs2	-0.968161	0.0930327
tRNA (guanine(26)-N(2))-dimethyltransferase	Trmt1	-0.0691147	0.504325
Microtubule-associated protein RP/EB family member 1	Mapre1	-0.0576981	0.644203
WD repeat-containing protein 26	Wdr26	0.252015	0.0481083
Glycerol-3-phosphate acyltransferase 4	Gpat4	-0.0322274	0.867177
Vacuolar protein sorting-associated protein 28 homolog	Vps28	0.248807	0.241132
Ribonucleoside-diphosphate reductase subunit M2	Rrm2	-0.429062	0.0257778
Beta-hexosaminidase subunit alpha	Hexa	-0.0216031	0.949867
GTP-binding protein	Ifi47	-0.147481	0.224687
Ubiquitin carboxyl-terminal hydrolase 8	Usp8	-0.0208401	0.893727
CAP-Gly domain-containing linker protein 2	Clip2	0.272972	0.260565
SR-related CTD-associated factor 11	Scaf11	-0.272034	0.0825571
Ras-related protein Rap-1A	Rap1a	-0.0288847	0.861623
Zinc finger CCCH domain-containing protein 18	Zc3h18	-0.111007	0.483509
Protein kinase C delta type	Prkcd	0.27322	0.19915
Serine-protein kinase ATM	Atm	-0.203622	0.17669
Sec24-related gene family, member D (S. cerevisiae)	Sec24d	0.177735	0.316051
Syndetin	Vps50	0.220105	0.222445
RNA N6-adenosine-methyltransferase METTL16	Mettl16	-0.00860876	0.940173
Nuclear pore complex protein Nup50	Nup50	-0.148305	0.261883
Differentially expressed in FDCP 6	Def6	0.203719	0.131518
PC4 and SFRS1-interacting protein	Psip1	-0.0973118	0.546444
Ankycorbin	Rai14	0.134942	0.403056
Selenocysteine-specific elongation factor	Eefsec	-0.0997323	0.592858
Ceramide transfer protein	Cert1	-0.186067	0.0956931
Intersectin-1	Itsn1	0.103316	0.329128
Hemopexin	HPX	NA	NA
ADP-ribosylation factor-binding protein GGA2	Gga2	0.719445	0.0106833
Brefeldin A-inhibited guanine nucleotide-exchange protein 2	Arfgef2	-0.0388548	0.845404
Coiled-coil domain-containing protein 6	Ccdc6	-0.0277645	0.865406
Bridging integrator 2	Bin2	0.0177901	0.878869
Histone-lysine N-methyltransferase SETD1A	Setd1a	-0.037819	0.805293
Ribose-phosphate diphosphokinase;Ribose-phosphate pyrophosphokinase 1	Prps1l3;Prps1	-0.0421035	0.654254
Polypeptide N-acetylgalactosaminyltransferase 1	Galnt1	-0.158095	0.144522
H-2 class I histocompatibility antigen, L-D alpha chain	H2-L	0.0236971	0.83095
Protease 1	NA	NA	NA
Heat shock 70 kDa protein 1-like	Hspa1l	0.385297	0.32456
Thioredoxin-dependent peroxide reductase, mitochondrial	Prdx3	-0.12553	0.5233
Branched-chain-amino-acid aminotransferase, cytosolic	Bcat1	-0.00216104	0.987216
60S ribosomal protein L12	Rpl12	-0.219826	0.140049
Adenosine kinase	Adk	0.0734491	0.491533
Serine palmitoyltransferase 2	Sptlc2	-0.154757	0.160911
Heterochromatin protein 1-binding protein 3	Hp1bp3	-0.0451811	0.863884
Myosin regulatory light chain 12B	Myl12b	0.133687	0.398509
Glycerol-3-phosphate dehydrogenase 1-like protein	Gpd1l	0.100596	0.498344
Protein PRRC1	Prrc1	-0.229612	0.243266
Voltage-dependent anion-selective channel protein 3	Vdac3	-0.168012	0.56877
Eukaryotic translation initiation factor 2D	Eif2d	-0.0211634	0.913077
Double-strand break repair protein MRE11	Mre11	-0.0704553	0.460924
Splicing factor 1	Sf1	-0.0597547	0.659783
40S ribosomal protein S9	Rps9	-0.473914	0.109037
Polycomb protein Suz12	Suz12	-0.159993	0.212349
Mannosyl-oligosaccharide glucosidase	Mogs	-0.326221	0.104789
Polypyrimidine tract-binding protein 3	Ptbp3	-0.0935856	0.512052
26S proteasome non-ATPase regulatory subunit 5	Psmd5	0.0788186	0.768737
Methionine aminopeptidase 1	Metap1	0.139294	0.227576
WASH complex subunit 5	Washc5	-0.00922726	0.956407
Vacuolar protein sorting-associated protein 52 homolog	Vps52	0.304857	0.0957254
Peptidylprolyl isomerase domain and WD repeat-containing protein 1	Ppwd1	-0.166581	0.140902
Protein arginine N-methyltransferase 5	Prmt5	-0.115624	0.256911
Hydroxymethylglutaryl-CoA synthase, cytoplasmic	Hmgcs1	-0.17301	0.175508
Parafibromin	Cdc73	0.057885	0.56546
Long-chain-fatty-acid--CoA ligase 5	Acsl5	-0.0628132	0.602958
Amyloid beta A4 precursor protein-binding family B member 1-interacting protein	Apbb1ip	0.104947	0.518328
ADP-dependent glucokinase	Adpgk	-0.212613	0.193881
ADP-ribosylation factor-like protein 8A	Arl8a	0.282318	0.119322
ATP-dependent DNA/RNA helicase DHX36	Dhx36	0.134152	0.456403
Transcriptional repressor p66-beta	Gatad2b	0.00832384	0.943122
MKI67 FHA domain-interacting nucleolar phosphoprotein	Nifk	-0.118547	0.357688
Probable ATP-dependent RNA helicase DDX41	Ddx41	-0.0626522	0.468661
Serine/threonine-protein phosphatase 6 regulatory subunit 3	Ppp6r3	0.1173	0.357026
SWI/SNF-related matrix-associated actin-dependent regulator of chromatin subfamily D member 2	Smarcd2	-0.0874327	0.432333
DnaJ homolog subfamily B member 11	Dnajb11	-0.0417188	0.735936
NADH dehydrogenase [ubiquinone] 1 alpha subcomplex subunit 10, mitochondrial	Ndufa10	-0.0881939	0.385964
GrpE protein homolog 1, mitochondrial	Grpel1	-0.0648625	0.721264
Methylcrotonoyl-CoA carboxylase subunit alpha, mitochondrial	Mccc1	-0.0227764	0.867177
Biliverdin reductase A	Blvra	0.0988456	0.317464
PAT complex subunit CCDC47	Ccdc47	0.0470186	0.721835
Protein PBDC1	Pbdc1	-0.166537	0.331648
mRNA turnover protein 4 homolog	Mrto4	-0.31426	0.0553305
Cytochrome c1, heme protein, mitochondrial	Cyc1	-0.344358	0.0489162
Nitric oxide synthase-interacting protein	Nosip	0.537618	0.0154663
Cytochrome b-c1 complex subunit 2, mitochondrial	Uqcrc2	-0.389736	0.0378958
cAMP-dependent protein kinase type I-alpha regulatory subunit	Prkar1a	0.43043	0.00772867
Electron transfer flavoprotein subunit beta	Etfb	-0.231889	0.100124
DAZ-associated protein 1	Dazap1	-0.172635	0.17524
Transforming protein RhoA	Rhoa	0.0865384	0.515914
Transmembrane emp24 domain-containing protein 2	Tmed2	-0.0788444	0.526854
Metastasis-associated protein MTA2	Mta2	-0.198066	0.146462
Proteasome subunit alpha type-1	Psma1	-0.171007	0.274626
Nibrin	Nbn	-0.178189	0.178254
V-type proton ATPase 116 kDa subunit a1	Atp6v0a1	-0.0960231	0.593949
Rab GTPase-activating protein 1	Rabgap1	0.10614	0.399714
RNA helicase	Dhx16	-0.116122	0.328813
A-kinase anchor protein 10, mitochondrial	Akap10	-0.00686111	0.955117
Tropomyosin alpha-3 chain	Tpm3	0.156669	0.523219
V-type proton ATPase subunit d 1	Atp6v0d1	-0.00711065	0.954789
SWI/SNF complex subunit SMARCC2	Smarcc2	-0.110251	0.479079
Eukaryotic translation initiation factor 2 subunit 1	Eif2s1	0.119775	0.344577
Probable ATP-dependent RNA helicase DDX10	Ddx10	-0.0422955	0.730005
Transmembrane 9 superfamily member 4	Tm9sf4	-0.191175	0.154511
Lanosterol synthase	Lss	-0.187138	0.0780892
Retinoblastoma-binding protein 5	Rbbp5	-0.0383852	0.72091
Phosphoinositide 3-kinase regulatory subunit 4	Pik3r4	0.155699	0.438597
UTP--glucose-1-phosphate uridylyltransferase	Ugp2	-0.0807924	0.628205
Torsin-1A-interacting protein 1	Tor1aip1	-0.21705	0.127172
Mannose-1-phosphate guanyltransferase alpha	Gmppa	0.170236	0.469039
ADP-ribosylation factor GTPase-activating protein 2	Arfgap2	0.161528	0.247215
MMS19 nucleotide excision repair protein homolog	Mms19	-0.0238573	0.914007
Cysteine and histidine-rich domain-containing protein 1	Chordc1	0.264971	0.0813937
Outer mitochondrial transmembrane helix translocase	Atad1	0.11355	0.412486
F-box-like/WD repeat-containing protein TBL1X	Tbl1x	-0.136534	0.294444
Twinfilin-2	Twf2	-0.106626	0.450062
Eukaryotic translation initiation factor 3 subunit G	Eif3g	-0.0179478	0.87006
Lysine-rich nucleolar protein 1	Knop1	0.0887283	0.535515
Ppfia1 protein	Ppfia1	0.0792196	0.638597
Signal recognition particle subunit SRP72	Srp72	0.0261941	0.878241
NK13	Serpinb6b	-0.10283	0.406761
Disintegrin and metalloproteinase domain-containing protein 10	Adam10	-0.658113	0.0121903
Nucleolysin TIAR	Tial1	-0.249563	0.25894
Protein transport protein Sec23A	Sec23a	0.244331	0.112322
Zinc finger CCCH-type antiviral protein 1	Zc3hav1	0.153518	0.319993
RNA polymerase II subunit A C-terminal domain phosphatase	Ctdp1	0.147487	0.328877
S-adenosylhomocysteine hydrolase-like protein 1	Ahcyl1	0.0933441	0.369202
Aftiphilin	Aftph	0.104995	0.558862
N-acetylglucosamine-6-sulfatase	Gns	0.084799	0.571475
Pyridoxal kinase	Pdxk	-0.253488	0.38614
IQ motif and SEC7 domain-containing protein 1	Iqsec1	-0.181557	0.318411
Exocyst complex component 1	Exoc1	0.256435	0.255251
Thioredoxin domain-containing protein 5	Txndc5	-0.198115	0.0642882
Mitochondrial 2-oxoglutarate/malate carrier protein	Slc25a11	-0.273288	0.31677
General transcription factor IIE subunit 2	Gtf2e2	0.0359192	0.810191
N-terminal kinase-like protein	Scyl1	0.0448943	0.795996
Synaptosomal-associated protein 29	Snap29	0.337392	0.0712347
Vesicle-trafficking protein SEC22b	Sec22b	-0.0430931	0.609917
C-terminal-binding protein 1	Ctbp1	-0.0574963	0.573102
Dihydrofolate reductase	Dhfr	0.0214066	0.884778
Cyclin-dependent kinase 4	Cdk4	0.381615	0.121916
Ribosomal RNA processing protein 1 homolog A	Rrp1	0.0910182	0.325834
WD repeat-containing protein 5	Wdr5	-0.130616	0.533951
Guanine nucleotide exchange protein SMCR8	Smcr8	0.146879	0.364852
Coiled-coil domain-containing protein 93	Ccdc93	0.235054	0.0658407
THO complex subunit 1	Thoc1	-0.115929	0.203014
Perilipin-3	Plin3	0.26288	0.207691
Protein SET	Set	-0.0983128	0.642537
Epididymis-specific alpha-mannosidase	Man2b2	0.106813	0.390175
Tyrosine-protein phosphatase non-receptor type 2	Ptpn2	0.0593566	0.766887
Pre-B-cell leukemia transcription factor-interacting protein 1	Pbxip1	0.0574093	0.604764
E3 ubiquitin-protein ligase HERC2	Herc2	0.295105	0.146462
Zinc finger protein ubi-d4	Dpf2	0.0961546	0.571475
Sarcoplasmic/endoplasmic reticulum calcium ATPase 3	Atp2a3	0.0232116	0.890259
Protein strawberry notch homolog 1	Sbno1	0.066885	0.437721
Probable E3 ubiquitin-protein ligase HERC4	Herc4	-0.303671	0.0780892
Cell division cycle protein 23 homolog	Cdc23	-0.128557	0.303627
Zinc finger protein 622	Znf622	0.581367	0.00455779
Nuclear factor NF-kappa-B p100 subunit	Nfkb2	-0.141181	0.160027
E3 ubiquitin-protein ligase ARIH1	Arih1	0.0905675	0.571475
Dedicator of cytokinesis protein 11	Dock11	-0.0372559	0.740869
Protein Wiz	Wiz	-0.075328	0.541311
Isocitrate dehydrogenase [NAD] subunit gamma 1, mitochondrial	Idh3g	-0.149777	0.241132
Lysine-specific demethylase 3B	Kdm3b	-0.0543121	0.810191
WD repeat-containing protein 43	Wdr43	-0.389327	0.0547437
Centrosomal protein of 55 kDa	Cep55	-0.155171	0.243645
Tyrosine--tRNA ligase, mitochondrial	Yars2	-0.216955	0.123823
Osteopontin	Spp1	-0.85191	0.0180354
DNA-(apurinic or apyrimidinic site) endonuclease	Apex1	-0.173352	0.214412
Nitric oxide synthase, inducible	Nos2	0.235666	0.59549
Glutathione synthetase	Gss	0.273059	0.147131
Disintegrin and metalloproteinase domain-containing protein 8	Adam8	0.176583	0.301702
Protein phosphatase 1 regulatory subunit 21	Ppp1r21	0.0972427	0.412437
5'-AMP-activated protein kinase catalytic subunit alpha-1	Prkaa1	0.171003	0.207691
Tumor susceptibility gene 101 protein	Tsg101	0.0382875	0.796296
Glomulin	Glmn	-0.130021	0.261351
Mixed lineage kinase domain-like protein	Mlkl	0.894834	0.00274428
Neuropilin-2	Nrp2	-0.290256	0.0838502
Intercellular adhesion molecule 1	Icam1	0.185967	0.327847
Chromobox protein homolog 3	Cbx3	-0.207694	0.1168
Prolyl 3-hydroxylase OGFOD1	Ogfod1	0.17231	0.355977
Chromobox protein homolog 5	Cbx5	-0.0773969	0.618801
Phosphoribosyl pyrophosphate synthase-associated protein 2	Prpsap2	-0.00622251	0.983802
Cyclin-dependent kinase 1	Cdk1	-0.347936	0.0992036
NEDD8 ultimate buster 1	Nub1	0.342376	0.0207031
CD180 antigen	Cd180	-0.241645	0.200014
Parkinson disease protein 7 homolog	Park7	-0.0508346	0.792348
Endoplasmic reticulum-Golgi intermediate compartment protein 1	Ergic1	-0.0856991	0.45052
AMP deaminase 3	Ampd3	0.252783	0.0827829
Integrin-linked protein kinase	Ilk	0.0760597	0.781553
Medium-chain specific acyl-CoA dehydrogenase, mitochondrial	Acadm	-0.0212252	0.847127
Rho GTPase-activating protein 30	Arhgap30	0.0620613	0.609398
Pre-mRNA-splicing regulator WTAP	Wtap	-0.0128037	0.934831
26S proteasome non-ATPase regulatory subunit 10	Psmd10	0.305124	0.183856
60S acidic ribosomal protein P0	Rplp0	-0.241796	0.108606
Hepatoma-derived growth factor	Hdgf	0.0666732	0.732902
Luc7-like protein 3	Luc7l3	-0.138642	0.284187
Exopolyphosphatase PRUNE1	Prune1	0.041294	0.887142
Regulator of chromosome condensation	Rcc1	-0.285548	0.0642046
DNA repair protein XRCC4	Xrcc4	0.297617	0.0776559
PHD finger protein 11	Phf11	0.155999	0.392751
2',5'-phosphodiesterase 12	Pde12	-0.00156218	0.993107
Unconventional myosin-Ig	Myo1g	-0.156884	0.38614
TGF-beta-activated kinase 1 and MAP3K7-binding protein 1	Tab1	-0.072372	0.489017
Basic leucine zipper and W2 domain-containing protein 2	Bzw2	-0.12453	0.39221
High mobility group protein B2	Hmgb2	-0.258875	0.403056
Perilipin-2	Plin2	1.54131	0.0132936
Proteasome activator complex subunit 2	Psme2	0.115907	0.432333
Nucleoside diphosphate kinase B	Nme2	-0.196125	0.175326
WD repeat-containing protein 48	Wdr48	0.0062139	0.958359
HCLS1-associated protein X-1	Hax1	0.126854	0.500689
Galectin-1	Lgals1	-0.0418247	0.788403
Carnitine O-palmitoyltransferase 2, mitochondrial	Cpt2	-0.191229	0.143292
Holocytochrome c-type synthase	Hccs	-0.166108	0.220958
Catechol O-methyltransferase	Comt	-0.00605159	0.958239
Eukaryotic translation initiation factor 4E	Eif4e	0.0710346	0.59549
Large proline-rich protein BAG6	Bag6	0.0836725	0.659783
Lysosomal alpha-glucosidase	Gaa	0.391801	0.206597
RNA-binding protein Raly	Raly	-0.224718	0.185564
Sorting nexin-6	Snx6	0.179208	0.386117
2'-5'-oligoadenylate synthase-like protein 1	Oasl1	-0.0860864	0.810191
Neutral amino acid transporter B(0)	Slc1a5	-0.214249	0.116707
Delta(14)-sterol reductase LBR	Lbr	-0.317489	0.109072
Aspartyl aminopeptidase	Dnpep	0.117406	0.323352
GTP-binding nuclear protein Ran	Ran	-0.10412	0.574468
Apol9a protein	Apol9a	-0.148771	0.451238
Basic leucine zipper and W2 domain-containing protein 1	Bzw1	-0.0643887	0.567884
Thioredoxin reductase 1, cytoplasmic	Txnrd1	-0.0303456	0.762758
Bromodomain PHD finger transcription factor	Bptf	0.0432448	0.725121
Caspase recruitment domain-containing protein 9	Card9	0.223284	0.187102
Coatomer subunit epsilon	Cope	0.211576	0.0712347
Hemoglobin subunit alpha	HBA	NA	NA
Calmodulin-1;Calmodulin-2;Calmodulin-3	Calm1;Calm2;Calm3	0.0233246	0.919173
Monocyte differentiation antigen CD14	Cd14	-0.171804	0.297471
Malate dehydrogenase, cytoplasmic	Mdh1	0.118485	0.262763
Methylmalonyl-CoA mutase, mitochondrial	Mmut	-0.0967276	0.334917
Ribosomal protein S6 kinase alpha-3	Rps6ka3	-0.0480333	0.724673
Guanine nucleotide-binding protein subunit alpha-13	Gna13	-0.00457205	0.959297
Huntingtin	Htt	-0.155632	0.504325
Dolichyl-diphosphooligosaccharide--protein glycosyltransferase subunit STT3A	Stt3a	-0.04714	0.642861
Quinone oxidoreductase	Cryz	-0.0702985	0.504498
ADP/ATP translocase 1	Slc25a4	-0.218638	0.413601
Inosine-5'-monophosphate dehydrogenase 1	Impdh1	-0.0651106	0.506162
Ras-related protein Rab-1A	Rab1A	0.0732433	0.691187
Serine/threonine-protein kinase N1	Pkn1	0.199158	0.243437
G patch domain-containing protein 4	Gpatch4	0.0265024	0.906823
General transcription factor IIF subunit 1	Gtf2f1	0.336433	0.154256
Endoplasmic reticulum metallopeptidase 1	Ermp1	-0.137514	0.357239
Probable ATP-dependent RNA helicase DDX49	Ddx49	-0.0943744	0.325834
Receptor-interacting serine/threonine-protein kinase 1	Ripk1	0.294186	0.0587322
Iron-sulfur clusters transporter ABCB7, mitochondrial	Abcb7	-0.31367	0.146462
Jupiter microtubule associated homolog 2	Jpt2	-0.0159707	0.922718
Ran-binding protein 10	Ranbp10	0.232439	0.163241
MICOS complex subunit Mic27	Apool	-0.0514563	0.702018
Echinoderm microtubule-associated protein-like 2	Eml2	-0.0401147	0.823313
Protein FAM98B	Fam98b	0.0495124	0.75015
E3 ubiquitin-protein ligase TRIM56	Trim56	0.0399998	0.731172
Autophagy-related protein 2 homolog B	Atg2b	0.427122	0.0787248
Protein THEM6	Them6	0.0421646	0.819958
Sec24-related gene family, member B (S. cerevisiae)	Sec24b	0.196901	0.242411
Leucine-rich repeat and WD repeat-containing protein 1	LRWD1	-0.0509971	0.654578
Lysophosphatidylcholine acyltransferase 2	Lpcat2	0.0670764	0.752639
NHL repeat-containing protein 2	Nhlrc2	0.0180884	0.92138
Septin-11	Septin11	-0.152818	0.461345
Probable E3 ubiquitin-protein ligase IRF2BPL	Irf2bpl	0.232259	0.089473
3-hydroxyisobutyryl-CoA hydrolase, mitochondrial	Hibch	0.298748	0.0403095
U3 small nucleolar RNA-associated protein 4 homolog	Utp4	-0.14083	0.586748
Mini-chromosome maintenance complex-binding protein	Mcmbp	0.154305	0.345646
WD repeat-containing protein 74	Wdr74	-0.210313	0.125334
Heterogeneous nuclear ribonucleoprotein U-like protein 1	Hnrnpul1	-0.187788	0.119505
Bifunctional UDP-N-acetylglucosamine 2-epimerase/N-acetylmannosamine kinase	Gne	0.0428449	0.803696
U3 small nucleolar RNA-interacting protein 2	Rrp9	-0.26722	0.0710748
Gbp6 protein	Gbp7	0.0630499	0.834523
TAR DNA-binding protein 43	Tardbp	-0.0750823	0.807973
Flavin reductase (NADPH)	Blvrb	0.427758	0.0443806
Clathrin interactor 1	Clint1	0.143883	0.26484
Ankyrin repeat domain-containing protein 17	Ankrd17	0.197917	0.106736
Actin-related protein 2/3 complex subunit 5	Arpc5	-0.178171	0.535183
Ragulator complex protein LAMTOR1	Lamtor1	0.0170589	0.923445
GTP-binding protein SAR1b	Sar1b	-0.082998	0.597472
RNA-binding protein 7	Rbm7	-0.110052	0.47694
Vacuolar protein sorting-associated protein VTA1 homolog	Vta1	0.0724205	0.548837
OCIA domain-containing protein 1	Ociad1	0.0984735	0.566053
Tumor protein D54	Tpd52l2	0.107484	0.372136
Replication factor C subunit 5	Rfc5	-0.239546	0.126888
Phosphoribosyl pyrophosphate synthase-associated protein 1	Prpsap1	0.220683	0.134699
Vesicular integral-membrane protein VIP36	Lman2	-0.109678	0.254924
Transmembrane protein 43	Tmem43	-0.0561693	0.796207
ATP synthase subunit d, mitochondrial	Atp5pd	-0.116215	0.350573
Serine hydrolase-like protein	Serhl	-0.259452	0.195651
Striatin-3	Strn3	0.0271485	0.815694
Mortality factor 4-like protein 2	Morf4l2	0.375513	0.0642882
Serine/threonine-protein kinase TBK1	Tbk1	0.209697	0.189068
Interferon-activated gene 207	Ifi207	-0.000387451	0.997781
ADP-ribosylation factor-interacting protein 1	Arfip1	-0.0472324	0.81195
GTP-binding protein 1	Gtpbp1	-0.0321155	0.779751
Hemoglobin fetal subunit beta	NA	NA	NA
Nucleoside diphosphate kinase A	Nme1	0.0506507	0.869149
Lysosomal protective protein	Ctsa	-0.185582	0.445174
Transcription initiation factor IIB	Gtf2b	0.424611	0.0226996
Proteasome subunit beta type-7	Psmb7	-1.15082	0.00072588
Epidermal growth factor receptor kinase substrate 8	Eps8	0.0833124	0.445683
Src kinase-associated phosphoprotein 2	Skap2	0.550715	0.0216217
Neurabin-2	Ppp1r9b	0.0737354	0.494101
SR-related and CTD-associated factor 4	Scaf4	0.00624393	0.958962
Pogo transposable element with ZNF domain	Pogz	0.0206708	0.870191
Tubulin-specific chaperone E	Tbce	-0.136633	0.280311
Collectin-12	Colec12	-0.405337	0.0325138
Inorganic pyrophosphatase 2, mitochondrial	Ppa2	-0.0966638	0.308306
Cleavage stimulation factor subunit 1	Cstf1	-0.0767703	0.640764
Translation initiation factor eIF-2B subunit alpha	Eif2b1	-0.00267412	0.985709
Periodic tryptophan protein 1 homolog	Pwp1	-0.11463	0.243655
6-phosphogluconolactonase	Pgls	-0.0288574	0.759284
39S ribosomal protein L19, mitochondrial	Mrpl19	-0.311693	0.0553696
LIM domain and actin-binding protein 1	Lima1	0.0532704	0.53617
Pleckstrin homology domain-containing family A member 2	Plekha2	0.164375	0.333368
Selenocysteine lyase	Scly	0.0563643	0.595222
Bifunctional polynucleotide phosphatase/kinase	Pnkp	0.0903949	0.300111
Sterol-4-alpha-carboxylate 3-dehydrogenase, decarboxylating	Nsdhl	-0.135705	0.405197
Proteasome subunit beta type-2	Psmb2	-0.384102	0.0215446
Succinate--CoA ligase [ADP/GDP-forming] subunit alpha, mitochondrial	Suclg1	-0.0970828	0.76764
Nucleolar complex protein 2 homolog	Noc2l	-0.232377	0.102208
Neurochondrin	Ncdn	0.330584	0.061673
Dedicator of cytokinesis protein 5	Dock5	-0.0269552	0.869149
Importin subunit alpha-4	Kpna3	-0.164463	0.203905
Beta-galactosidase	Glb1	0.187449	0.106837
Nuclear protein localization protein 4 homolog	Nploc4	0.144309	0.246534
Rho GTPase-activating protein 17	Arhgap17	-0.0182543	0.851534
NADPH:adrenodoxin oxidoreductase, mitochondrial	Fdxr	-0.00829025	0.942319
La-related protein 4B	Larp4b	0.112285	0.427904
U2 snRNP-associated SURP motif-containing protein	U2surp	-0.155819	0.183628
Periodic tryptophan protein 2 homolog	Pwp2	-0.158765	0.476195
Splicing factor 45	Rbm17	-0.0979144	0.468661
Transcription factor 25	Tcf25	0.487754	0.0281899
Rab GTPase-binding effector protein 2	Rabep2	0.274683	0.0786464
BAG family molecular chaperone regulator 2	Bag2	0.106555	0.312425
Kinesin-like protein KIF2C	Kif2c	-0.00234551	0.987139
Cleavage stimulation factor subunit 3	Cstf3	0.0233518	0.852564
CDK5 regulatory subunit-associated protein 3	Cdk5rap3	-0.117869	0.305395
Lysophosphatidylserine lipase ABHD12	Abhd12	-0.114435	0.638006
ELKS/Rab6-interacting/CAST family member 1	Erc1	-0.0646606	0.598148
Epoxide hydrolase 1	Ephx1	0.0744343	0.632213
Ribosome biogenesis protein BRX1 homolog	Brix1	-0.150443	0.512663
Mediator of RNA polymerase II transcription subunit 12	Med12	-0.0284782	0.854459
Ubiquitin-like protein 4A	Ubl4a	0.145607	0.182036
RAC-alpha serine/threonine-protein kinase	Akt1	0.0109837	0.956809
Antigen peptide transporter 2	Tap2	0.212249	0.190502
Green fluorescent protein	GFP	NA	NA
60S ribosomal protein L13	Rpl13	-0.308125	0.136425
Protein 4.1	Epb41	0.0474165	0.688223
Ubiquitin carboxyl-terminal hydrolase 10	Usp10	-0.0200351	0.856021
Lysine-specific demethylase 2A	Kdm2a	0.279263	0.108606
40S ribosomal protein S14	Rps14	-0.189147	0.219281
Unconventional myosin-If	Myo1f	-0.104557	0.449968
Serine/threonine-protein phosphatase 2A 56 kDa regulatory subunit gamma isoform	Ppp2r5c	-0.0112001	0.954739
Fibronectin type III domain-containing protein 3B	Fndc3b	0.250494	0.179723
La-related protein 4	Larp4	-0.0131942	0.90563
Death-inducer obliterator 1	Dido1	-0.178647	0.309021
Bcl-2-associated transcription factor 1	Bclaf1	0.0155102	0.931165
Metastasis-associated protein MTA1	Mta1	-0.439948	0.119006
Actin-histidine N-methyltransferase	Setd3	0.11174	0.399243
Transmembrane emp24 domain-containing protein 9	Tmed9	-0.0874376	0.5024
COP9 signalosome complex subunit 1	Gps1	-0.0572307	0.583616
Ubiquilin-4	Ubqln4	-0.196986	0.32249
mRNA cap guanine-N7 methyltransferase	Rnmt	0.15613	0.128448
Something about silencing protein 10	Utp3	-0.120018	0.441968
Disintegrin and metalloproteinase domain-containing protein 17	Adam17	-0.530943	0.0205139
Double-stranded RNA-binding protein Staufen homolog 1	Stau1	0.343186	0.0531402
SPI6	Serpinb9	0.292542	0.0500613
Dual specificity mitogen-activated protein kinase kinase 3	Map2k3	0.0591956	0.762758
SRSF protein kinase 1	Srpk1	-0.022896	0.878583
Histone H1.3	H1-3	-0.350011	0.250929
Immunoglobulin-binding protein 1	Igbp1	0.173198	0.170927
Protein mono-ADP-ribosyltransferase PARP12	Parp12	-0.198034	0.314599
7SK snRNA methylphosphate capping enzyme	Mepce	0.105332	0.642537
Coronin-7	Coro7	0.069443	0.788403
Thioredoxin-related transmembrane protein 2	Tmx2	0.121628	0.220354
Pentatricopeptide repeat domain-containing protein 3, mitochondrial	Ptcd3	-0.250645	0.0712347
Terminal uridylyltransferase 7	Tut7	0.245594	0.0972742
Kinesin-like protein KIF15	Kif15	-0.135239	0.414238
Cytoplasmic dynein 1 light intermediate chain 2	Dync1li2	0.276042	0.0583068
Integrator complex subunit 3	Ints3	-0.194565	0.202466
Lysophosphatidic acid phosphatase type 6	Acp6	-0.26031	0.488796
GDH/6PGL endoplasmic bifunctional protein	H6pd	-0.0544794	0.798765
Kelch domain-containing protein 4	Klhdc4	0.242257	0.0768515
DCN1-like protein 5	Dcun1d5	0.233381	0.0701559
Zinc finger CCHC domain-containing protein 8	Zcchc8	-0.178987	0.131136
Mitochondrial import receptor subunit TOM40 homolog	Tomm40	-0.189601	0.175993
Prolactin regulatory element-binding protein	Preb	-0.313863	0.298679
2-amino-3-ketobutyrate coenzyme A ligase, mitochondrial	Gcat	-0.408373	0.037896
Serine/threonine-protein kinase A-Raf	Araf	-0.00550377	0.971329
Signal recognition particle receptor subunit beta	Srprb	-0.122702	0.35231
Gem (Nuclear organelle) associated protein 4	Gemin4	-0.361052	0.31101
Brain-specific angiogenesis inhibitor 1-associated protein 2	Baiap2	0.243309	0.147489
60S ribosomal export protein NMD3	Nmd3	0.295299	0.0614023
CCR4-NOT transcription complex subunit 9	Cnot9	0.089195	0.648389
Peroxiredoxin-4	Prdx4	-0.183282	0.178926
Phosphatidylinositol 5-phosphate 4-kinase type-2 alpha	Pip4k2a	0.0685564	0.468661
Interferon-related developmental regulator 1	Ifrd1	1.17652	0.00057816
E3 ubiquitin-protein ligase CBL	Cbl	0.0639597	0.532563
YTH domain-containing family protein 1	Ythdf1	0.0348727	0.827073
Peroxiredoxin-2	Prdx2	0.201909	0.103916
Rab3 GTPase-activating protein catalytic subunit	Rab3gap1	0.0922704	0.469665
Electron transfer flavoprotein-ubiquinone oxidoreductase, mitochondrial	Etfdh	-0.0313308	0.719739
Trifunctional enzyme subunit beta, mitochondrial	Hadhb	-0.0407698	0.754762
Sodium/myo-inositol cotransporter	Slc5a3	-0.487711	0.089473
BAG family molecular chaperone regulator 3	Bag3	1.0229	0.00483959
PHD finger protein 3	Phf3	0.148773	0.52656
IQ motif-containing GTPase-activating protein 3	Iqgap3	-0.235606	0.200326
Cytoplasmic aconitate hydratase	Aco1	0.0345275	0.780434
40S ribosomal protein S5	Rps5	-0.219107	0.660172
Apoptosis regulator BAX	Bax	0.111563	0.495933
Ubiquitin-protein ligase E3C	Ube3c	-0.301232	0.0966133
Vesicle-associated membrane protein-associated protein A	Vapa	-0.101801	0.512052
N-alpha-acetyltransferase 50	Naa50	0.282832	0.0759721
AFG3-like protein 1	Afg3l1	-0.237065	0.246364
Receptor-type tyrosine-protein phosphatase alpha	Ptpra	-0.237595	0.0557784
Histone-lysine N-methyltransferase EZH2	Ezh2	-0.265738	0.119141
Sorcin	Sri	0.155761	0.451854
Protein Hook homolog 3	Hook3	0.396365	0.0367169
Testis-expressed protein 10	Tex10	-0.261529	0.35231
Replication protein A 32 kDa subunit	Rpa2	-0.158649	0.162208
Proteasome subunit beta type-5	Psmb5	-1.0415	0.0134753
Thyroid adenoma-associated protein homolog	Thada	-0.205463	0.268038
SLAIN motif-containing protein 2	Slain2	0.185767	0.202466
Probable ATP-dependent RNA helicase DHX58	Dhx58	-0.271892	0.244938
Chromodomain-helicase-DNA-binding protein 1-like	Chd1l	0.137719	0.351217
39S ribosomal protein L46, mitochondrial	Mrpl46	-0.279094	0.0893691
Osteoclast-stimulating factor 1	Ostf1	0.0348514	0.870191
ATPase GET3	Get3	-0.31772	0.23898
Alcohol dehydrogenase class-3	Adh5	-0.109223	0.372382
Histone acetyltransferase KAT7	Kat7	0.247697	0.198846
U1 small nuclear ribonucleoprotein 70 kDa	Snrnp70	-0.0572	0.760317
Phosphatidylinositol 3-kinase catalytic subunit type 3	Pik3c3	0.182765	0.35231
Cell division cycle and apoptosis regulator protein 1	Ccar1	-0.113393	0.325059
E3 ubiquitin-protein ligase RNF114	Rnf114	0.0287586	0.874845
HEAT repeat-containing protein 3	Heatr3	0.029817	0.923823
Protein unc-45 homolog A	Unc45a	0.296402	0.092126
p21-activated protein kinase-interacting protein 1	Pak1ip1	0.048199	0.864331
Interferon-activable protein 203	Ifi203	0.175255	0.492082
Choline-phosphate cytidylyltransferase A	Pcyt1a	0.513643	0.0353525
Monoacylglycerol lipase ABHD6	Abhd6	-0.0500119	0.647028
Proteasome subunit alpha type-6	Psma6	-0.504832	0.0237084
Peptidyl-prolyl cis-trans isomerase G	Ppig	-0.181821	0.229344
Histone acetyltransferase p300	Ep300	-0.0681007	0.618316
Brefeldin A-inhibited guanine nucleotide-exchange protein 1	Arfgef1	0.0883719	0.664829
Serine/arginine-rich splicing factor 5	Srsf5	-0.143067	0.251948
Peptidyl-prolyl cis-trans isomerase FKBP8	Fkbp8	0.145916	0.160416
SWI/SNF-related matrix-associated actin-dependent regulator of chromatin subfamily E member 1	Smarce1	-0.0135253	0.93836
Docking protein 2	Dok2	-0.0799407	0.354748
DNA (cytosine-5)-methyltransferase 3A	Dnmt3a	-0.312177	0.0992036
IgE-binding protein	Iap	-0.0458011	0.59549
Thioredoxin	Txn	-0.2456	0.345541
Bifunctional methylenetetrahydrofolate dehydrogenase/cyclohydrolase, mitochondrial	Mthfd2	-0.240239	0.219574
Cytochrome c oxidase subunit 5B, mitochondrial	Cox5b	-0.291115	0.100351
Ras-related protein Rab-6A	Rab6a	-0.0402499	0.750938
Vacuolar protein sorting-associated protein 26A	Vps26a	0.311941	0.0971958
Long-chain-fatty-acid--CoA ligase 1	Acsl1	0.0126335	0.899821
Glutathione reductase, mitochondrial	Gsr	-0.0485163	0.878352
Arylsulfatase B	Arsb	-0.0632965	0.647676
U2 small nuclear ribonucleoprotein A'	Snrpa1	-0.183955	0.381785
40S ribosomal protein S8	Rps8	-0.208931	0.164867
ADP-ribosylation factor 6	Arf6	-0.208831	0.355311
Wiskott-Aldrich syndrome protein homolog	Was	-0.127406	0.2963
Caspase-3	Casp3	0.0145434	0.939085
Spermine synthase	Sms	-0.141903	0.258212
60S acidic ribosomal protein P2	Rplp2	-0.214725	0.245779
Peroxiredoxin-5, mitochondrial	Prdx5	0.031561	0.8393
Transcriptional repressor protein YY1	Yy1	0.158242	0.446096
Polynucleotide 5'-hydroxyl-kinase NOL9	Nol9	-0.188146	0.164716
Threonine--tRNA ligase, mitochondrial	Tars2	-0.185562	0.286796
ESF1 homolog	Esf1	-0.081083	0.54025
G-patch domain and KOW motifs-containing protein	Gpkow	0.0126319	0.919173
Casein kinase II subunit alpha	Csnk2a1	-0.0708013	0.427762
KH domain-containing, RNA-binding, signal transduction-associated protein 1	Khdrbs1	-0.20097	0.157915
Importin subunit alpha-5	Kpna1	0.0415085	0.693368
Prosaposin	Psap	0.0294548	0.926065
Tumor protein D52	Tpd52	0.101643	0.618027
Serine/arginine-rich splicing factor 1	Srsf1	-0.224776	0.304758
Zinc finger CCCH domain-containing protein 4	Zc3h4	-0.146562	0.325834
Formin-binding protein 4	Fnbp4	-0.206971	0.160911
Inositol hexakisphosphate and diphosphoinositol-pentakisphosphate kinase 2	Ppip5k2	-0.0483843	0.740343
Malectin	Mlec	-0.162495	0.261624
Serine/threonine-protein phosphatase 1 regulatory subunit 10	Ppp1r10	0.166514	0.357274
Glutamate-rich WD repeat-containing protein 1	Grwd1	-0.0506366	0.679656
Volume-regulated anion channel subunit LRRC8D	Lrrc8d	-0.00480408	0.97086
CDKN2A-interacting protein	Cdkn2aip	-0.0280438	0.793515
Small glutamine-rich tetratricopeptide repeat-containing protein alpha	Sgta	0.0144081	0.896452
28S ribosomal protein S27, mitochondrial	Mrps27	-0.11027	0.607365
60S ribosomal protein L24	Rpl24	-0.424518	0.230657
ADP-ribose pyrophosphatase, mitochondrial	Nudt9	-0.180073	0.169224
YTH domain-containing family protein 3	Ythdf3	0.0819972	0.60285
Vacuolar protein sorting-associated protein 26B	Vps26b	-0.050867	0.726599
Protein HGH1 homolog	Hgh1	-0.0559049	0.776479
Negative elongation factor B	Nelfb	-0.000802234	0.993909
Abl interactor 1	Abi1	0.0769261	0.510479
DIS3-like exonuclease 2	Dis3l2	-0.0498292	0.689534
Serine/threonine-protein phosphatase 4 regulatory subunit 1	Ppp4r1	0.0683673	0.526854
Nucleoporin NDC1	Ndc1	-0.241946	0.115201
Ubiquitin-like modifier-activating enzyme 5	Uba5	0.149714	0.353497
Nucleolar complex protein 3 homolog	Noc3l	-0.381257	0.201705
Phosphatidylinositol 5-phosphate 4-kinase type-2 gamma	Pip4k2c	-0.00457065	0.972353
mRNA-decapping enzyme 1A	Dcp1a	0.0557486	0.606804
eEF1A lysine and N-terminal methyltransferase	EEF1AKNMT	-0.0638786	0.70844
Retinoid-inducible serine carboxypeptidase	Scpep1	0.232815	0.112854
Exosome complex component RRP41	Exosc4	-0.193477	0.592731
Protein arginine N-methyltransferase 3	Prmt3	-0.112035	0.466991
cGMP-dependent 3',5'-cyclic phosphodiesterase	Pde2a	0.283188	0.0656434
WW domain-binding protein 11	Wbp11	-0.178103	0.0992036
Replication factor C subunit 4	Rfc4	-0.143915	0.385719
1,2-dihydroxy-3-keto-5-methylthiopentene dioxygenase	Adi1	0.349484	0.0642882
Ras-related GTP-binding protein C	Rragc	0.0697559	0.684967
Hydroxyacylglutathione hydrolase, mitochondrial	Hagh	0.504716	0.0262913
RNA-binding protein 10	Rbm10	-0.235493	0.0948843
Hsc70-interacting protein	St13	0.130211	0.357026
Chloride channel CLIC-like protein 1	Clcc1	-0.0691537	0.582643
Phosphoserine phosphatase	Psph	0.331583	0.0838502
ATP synthase F(0) complex subunit B1, mitochondrial	Atp5pb	-0.16873	0.180989
Transmembrane protein 33	Tmem33	-0.0827762	0.641526
Mitochondrial potassium channel ATP-binding subunit	Abcb8	-0.0768494	0.487573
Single-stranded DNA-binding protein, mitochondrial	Ssbp1	-0.189302	0.103018
ATP-dependent (S)-NAD(P)H-hydrate dehydratase	Naxd	-0.100956	0.419282
Eukaryotic translation elongation factor 1 epsilon-1	Eef1e1	-0.0317711	0.867177
Protein SAAL1	Saal1	-0.0769558	0.5714
RNA polymerase II-associated protein 3	Rpap3	0.147835	0.235712
RNA 3'-terminal phosphate cyclase	RtcA	0.0996886	0.436255
Mitochondrial import inner membrane translocase subunit TIM50	Timm50	-0.243003	0.144522
Proline-, glutamic acid- and leucine-rich protein 1	Pelp1	-0.167776	0.200075
Short/branched chain specific acyl-CoA dehydrogenase, mitochondrial	Acadsb	-0.0650154	0.659783
Protein phosphatase inhibitor 2	Ppp1r2	0.342004	0.297379
LRP chaperone MESD	Mesd	-0.188816	0.18445
NADH dehydrogenase [ubiquinone] 1 alpha subcomplex subunit 13	Ndufa13	-0.12954	0.548153
Stromal cell-derived factor 2-like protein 1	Sdf2l1	-0.199222	0.358572
Isovaleryl-CoA dehydrogenase, mitochondrial	Ivd	0.0330237	0.757509
ADP-sugar pyrophosphatase	Nudt5	0.0754161	0.467069
CD2-associated protein	Cd2ap	-0.0950623	0.471814
Protein numb homolog	Numb	-0.0638727	0.453479
Prostaglandin E synthase 3	Ptges3	-0.209819	0.578277
tRNA pseudouridine synthase A	Pus1	-0.102838	0.63052
Eukaryotic translation initiation factor 4H	Eif4h	-0.106524	0.429022
Cathepsin Z	Ctsz	-0.0664781	0.56612
Nuclear factor of activated T-cells 5	Nfat5	-0.0503121	0.612323
TFG protein	Tfg	-0.0446872	0.752836
Aminoacyl tRNA synthase complex-interacting multifunctional protein 1	Aimp1	-0.0218848	0.829629
5'-3' exoribonuclease 1	Xrn1	-0.107287	0.728697
Caspase-7	Casp7	0.199647	0.181861
GA-binding protein alpha chain	Gabpa	0.0303634	0.75193
Core-binding factor subunit beta	Cbfb	-0.00872151	0.94548
Protein SMG7	Smg7	0.226224	0.0992036
Immunity-related GTPase family M protein 1	Irgm1	-0.402247	0.143547
Probable aminopeptidase NPEPL1	Npepl1	0.0350075	0.821839
Ankyrin repeat and LEM domain-containing protein 2	Ankle2	0.0189614	0.872259
Serine/threonine-protein kinase SIK3	Sik3	-0.00274192	0.981128
Acetyl-Coenzyme A acetyltransferase 3;Acetyl-CoA acetyltransferase, cytosolic	Acat3;Acat2	-0.126957	0.356115
Ras-related GTP-binding protein A	Rraga	0.171827	0.20188
Nucleolar protein 11	Nol11	-0.124481	0.347429
Dipeptidyl peptidase 9	Dpp9	-0.0908819	0.754259
ATP-binding cassette sub-family F member 3	Abcf3	0.497868	0.0180477
Enhancer of mRNA-decapping protein 3	Edc3	-0.231236	0.333368
Protein FAM3C	Fam3c	-0.283672	0.0587322
Suppressor of SWI4 1 homolog	Ppan	-0.09812	0.429452
Dynactin subunit 2	Dctn2	0.257866	0.104395
S-methyl-5'-thioadenosine phosphorylase	Mtap	-0.0844471	0.387438
Methylthioribose-1-phosphate isomerase	Mri1	-0.0873935	0.468661
Magnesium transporter protein 1	Magt1	-0.0995202	0.612642
Acyl carrier protein, mitochondrial	Ndufab1	-0.186005	0.277923
Minor histocompatibility antigen H13	Hm13	-0.14388	0.222383
m7GpppX diphosphatase	Dcps	-0.247242	0.251948
NADH-cytochrome b5 reductase 1	Cyb5r1	-0.0927365	0.618801
Protein-associating with the carboxyl-terminal domain of ezrin	Scyl3	0.12001	0.416587
Eukaryotic translation initiation factor 3 subunit K	Eif3k	-0.0529935	0.826024
Focadhesin	Focad	-0.147406	0.591461
Queuosine salvage protein	2210016F16Rik	-0.0195782	0.924528
Urokinase-type plasminogen activator	Plau	-0.924881	0.00402044
Lysosome-associated membrane glycoprotein 1	Lamp1	0.0206524	0.87181
GTP-binding protein SAR1a	Sar1a	-0.092987	0.569386
Flap endonuclease 1	Fen1	-0.0765666	0.558862
Striatin-4	Strn4	-0.0144201	0.914936
Dynein light chain roadblock-type 1	Dynlrb1	0.146898	0.540112
Hippocalcin-like protein 1	Hpcal1	-0.0753813	0.81188
Cas scaffolding protein family member 4	Cass4	1.07284	0.0108481
Pachytene checkpoint protein 2 homolog	Trip13	-0.257077	0.0803505
Large subunit GTPase 1 homolog	Lsg1	0.131939	0.357026
Pre-mRNA-splicing factor 38A	Prpf38a	-0.220304	0.144522
45 kDa calcium-binding protein	Sdf4	-0.640373	0.0108823
Syntaxin-binding protein 2	Stxbp2	0.23677	0.191491
CCR4-NOT transcription complex subunit 10	Cnot10	0.182244	0.333159
Nuclear cap-binding protein subunit 3	Ncbp3	-0.0401669	0.741464
Tetratricopeptide repeat protein 27	Ttc27	-0.0360353	0.845365
Interferon-inducible protein AIM2	Aim2	0.15673	0.508905
Acyl-CoA (8-3)-desaturase	Fads1	-0.524146	0.0793678
BolA-like protein 1	Bola1	-0.233974	0.0924415
Origin recognition complex subunit 3	Orc3	-0.0843844	0.449921
Actin-related protein 2/3 complex subunit 3	Arpc3	0.0573124	0.867177
Acyl-coenzyme A thioesterase 2, mitochondrial	Acot2	0.0438273	0.756641
N-acetyl-D-glucosamine kinase	Nagk	0.0694673	0.766887
Inner nuclear membrane protein Man1	Lemd3	-0.307134	0.122813
60S ribosomal protein L9	Rpl9-ps6;Rpl9	-0.0683938	0.777125
Uncharacterized protein	NA	NA	NA
Barrier-to-autointegration factor	Banf1	-0.19108	0.403532
Phosphatidylinositol 3-kinase regulatory subunit alpha	Pik3r1	0.136037	0.419808
40S ribosomal protein S15a	Rps15a	-0.282378	0.435585
Beta-1,4 N-acetylgalactosaminyltransferase 1	B4galnt1	-0.279468	0.0600454
Patatin-like phospholipase domain-containing protein 6	Pnpla6	-0.103855	0.647028
Sorting nexin-27	Snx27	-0.198393	0.177065
Synergin gamma	Synrg	0.0998115	0.714881
Protein LTV1 homolog	Ltv1	0.398248	0.0147558
Bromodomain-containing protein 2	Brd2	0.193525	0.196763
TIP41-like protein	Tiprl	0.114698	0.306217
Anaphase-promoting complex subunit 5	Anapc5	-0.199433	0.29898
Synaptojanin-1	Synj1	0.0988921	0.450141
Beta-arrestin-2	Arrb2	0.00835886	0.958909
LIM and senescent cell antigen-like-containing domain protein 1	Lims1	0.335253	0.062647
BRCA1-associated protein	Brap	0.621417	0.0163887
Pre-mRNA-splicing factor SPF27	Bcas2	-0.148169	0.444645
Peroxisomal acyl-coenzyme A oxidase 3	Acox3	0.19437	0.170648
Interferon-activable protein 202	Ifi202	0.541222	0.104352
Nuclear receptor corepressor 2	Ncor2	0.0255579	0.861275
cAMP-dependent protein kinase catalytic subunit beta	Prkacb	-0.146749	0.433349
Acidic leucine-rich nuclear phosphoprotein 32 family member E	Anp32e	-0.00673075	0.968103
28S ribosomal protein S31, mitochondrial	Mrps31	-0.105691	0.489017
HEAT repeat-containing protein 5B	Heatr5b	0.246051	0.121916
NmrA-like family domain-containing protein 1	Nmral1	-0.0508283	0.688223
U3 small nucleolar ribonucleoprotein protein IMP3	Imp3	-0.0402666	0.879829
Proline-serine-threonine phosphatase-interacting protein 2	Pstpip2	0.176388	0.209735
PDZ domain-containing protein GIPC1	Gipc1	0.151249	0.445763
Lysosomal acid lipase/cholesteryl ester hydrolase	Lipa	-0.461595	0.0785206
Phosphomannomutase 2	Pmm2	0.0806394	0.372382
Galectin-9	Lgals9	0.138494	0.412437
26S proteasome non-ATPase regulatory subunit 4	Psmd4	0.205719	0.133349
Muskelin	Mkln1	0.336782	0.0334033
Serum albumin	ALB	NA	NA
Delta-aminolevulinic acid dehydratase	Alad	-0.161294	0.341708
Hydroxymethylglutaryl-CoA lyase, mitochondrial	Hmgcl	-0.302695	0.371379
Protein mago nashi homolog	Magoh	-0.217718	0.166098
Protein FRG1	Frg1	0.0457036	0.827156
Putative phospholipase B-like 2	Plbd2	0.16015	0.493258
RNA exonuclease 4	Rexo4	-0.0946224	0.688631
Pre-mRNA-splicing factor RBM22	Rbm22	-0.0245515	0.87006
Neurolysin, mitochondrial	Nln	-0.155798	0.173208
Dynein light chain 2, cytoplasmic	Dynll2	0.551484	0.160083
Oligoribonuclease, mitochondrial	Rexo2	0.104288	0.493798
Exportin-4	Xpo4	-0.128087	0.609917
S-phase kinase-associated protein 1	Skp1	0.34321	0.0237084
TNFAIP3-interacting protein 1	Tnip1	0.0898501	0.701975
Protein virilizer homolog	Virma	0.00826613	0.971329
Transcriptional repressor NF-X1	Nfx1	0.591796	0.0571779
THO complex subunit 6 homolog	Thoc6	-0.117456	0.465687
UDP-glucuronosyltransferase 1A7	Ugt1a7	0.00822963	0.961938
Cytohesin-4	Cyth4	0.221763	0.0581222
Serine/threonine-protein phosphatase 4 regulatory subunit 3B	Ppp4r3b	-0.0556301	0.584573
Tapasin	Tapbp	0.108082	0.660723
Protein sel-1 homolog 1	Sel1l	-0.148656	0.297839
Cytoplasmic dynein 1 intermediate chain 2	Dync1i2	0.266804	0.0833424
Thymidylate synthase	Tyms	-0.353476	0.0437635
ATP-binding cassette sub-family D member 1	Abcd1	-0.10286	0.397833
DNA-binding protein Ikaros	Ikzf1	-0.161446	0.328408
Caseinolytic peptidase B protein homolog	Clpb	-0.300229	0.0357666
Endophilin-A2	Sh3gl1	0.286523	0.213717
FH1/FH2 domain-containing protein 1	Fhod1	-0.0563638	0.762758
Hematopoietic prostaglandin D synthase	Hpgds	-0.154424	0.463756
Zinc finger E-box-binding homeobox 2	Zeb2	0.277483	0.167258
URB2 ribosome biogenesis 2 homolog (S. cerevisiae)	Urb2	-0.190449	0.345646
MLV-related proviral Env polyprotein	NA	-0.771863	0.0257778
Cyclin-dependent kinase 7	Cdk7	0.335381	0.127172
TRAF-type zinc finger domain-containing protein 1	Trafd1	1.19036	0.00327303
RNA polymerase II elongation factor ELL2	Ell2	0.169571	0.429138
Cystatin-B	Cstb	0.132805	0.633167
Leucine-rich repeat flightless-interacting protein 2	Lrrfip2	0.27806	0.0845507
Exocyst complex component 7	Exoc7	0.164685	0.177972
Protein S100-A4	S100a4	-0.0928379	0.768493
Tyrosine-protein kinase JAK1	Jak1	0.677172	0.00483959
Putative sodium-coupled neutral amino acid transporter 10	Slc38a10	0.433087	0.0506292
Serine/threonine-protein kinase MRCK beta	Cdc42bpb	-0.132688	0.575552
Pumilio homolog 2	Pum2	-0.0583417	0.77687
Mitofusin-1	Mfn1	-0.0818923	0.695664
RNA-binding protein 4;RNA-binding protein 4B	Rbm4;Rbm4b	0.0567545	0.744074
Toll-like receptor 2	Tlr2	-0.264217	0.306443
Erbin	Erbin	-0.205863	0.545352
Kinetochore-associated protein 1	Kntc1	-0.283206	0.061673
Solute carrier organic anion transporter family member 4A1	Slco4a1	-0.157516	0.555218
Tumor necrosis factor alpha-induced protein 8-like protein 2	Tnfaip8l2	0.626542	0.0581222
Zinc finger, MYND-type-containing 8	Zmynd8	0.175479	0.415205
Stathmin	Stmn1	-0.164253	0.206504
[truncated: 4,073 more rows]

## Sheet: RAW_unt_sgHUWE1_vs_unt_sgROSA
Protein names	Gene names	logFC_unt_HUWE1 vs unt_sgROSA	adj.P.Val_unt_HUWE1 vs unt_sgROSA
Plectin	Plec	-0.199313	0.209985
AHNAK nucleoprotein (desmoyokin)	Ahnak	-0.0221007	0.874717
Cytoplasmic dynein 1 heavy chain 1	Dync1h1	-0.0270679	0.830344
Microtubule-actin cross-linking factor 1	Macf1	-0.0149017	0.899632
E3 ubiquitin-protein ligase RNF213	Rnf213	-0.218405	0.297992
Myosin-9	Myh9	0.0632378	0.663184
Talin-1	Tln1	-0.124072	0.410782
Clathrin heavy chain 1	Cltc	-0.108369	0.547369
Filamin-B	Flnb	-0.171005	0.228786
Pyruvate kinase PKM	Pkm	-0.138384	0.3732
Filamin-A	Flna	-0.129262	0.289163
Fatty acid synthase	Fasn	0.010979	0.922351
Ras GTPase-activating-like protein IQGAP1	Iqgap1	0.0360683	0.677104
Proliferation marker protein Ki-67	Mki67	0.56409	0.0977339
E3 SUMO-protein ligase RanBP2	Ranbp2	-0.0741827	0.524186
E3 ubiquitin-protein ligase UBR4	Ubr4	-0.00456927	0.971628
eIF-2-alpha kinase activator GCN1	Gcn1	0.000582984	0.995435
Heat shock protein HSP 90-beta	Hsp90ab1	0.0207676	0.876951
U5 small nuclear ribonucleoprotein 200 kDa helicase	Snrnp200	0.000948137	0.991235
Prolow-density lipoprotein receptor-related protein 1	Lrp1	-0.200147	0.289163
Pre-mRNA-processing-splicing factor 8	Prpf8	-0.0785586	0.487883
Heterogeneous nuclear ribonucleoprotein M	Hnrnpm	-0.0118129	0.919021
Nucleoprotein TPR	Tpr	0.117937	0.430468
Heat shock cognate 71 kDa protein	Hspa8	-0.102336	0.566882
Actin, cytoplasmic 1	Actb	-0.0129352	0.945603
Chromodomain-helicase-DNA-binding protein 4	Chd4	0.112803	0.355843
Midasin	Mdn1	-0.0424113	0.701281
Alpha-2-macroglobulin	A2M	NA	NA
Myb-binding protein 1A	Mybbp1a	-0.213136	0.372168
CAD protein	Cad	-0.00650237	0.966332
Plastin-2	Lcp1	-0.0434116	0.67187
Bifunctional glutamate/proline--tRNA ligase	Eprs1	0.0281989	0.8138
Vimentin	Vim	-0.0311541	0.830344
Transitional endoplasmic reticulum ATPase	Vcp	0.00087946	0.995435
Elongation factor 2	Eef2	-0.157499	0.445641
60 kDa heat shock protein, mitochondrial	Hspd1	-0.0368178	0.820943
Vacuolar protein sorting-associated protein 13C	Vps13c	-0.0253346	0.855529
Glyceraldehyde-3-phosphate dehydrogenase	Gapdh	-0.236549	0.549996
Prelamin-A/C	Lmna	-0.0809071	0.559558
Heat shock 70 kDa protein 4	Hspa4	0.135715	0.331862
Dedicator of cytokinesis protein 2	Dock2	-0.00946829	0.930778
Myoferlin	Myof	-0.199379	0.289163
Leucine-rich PPR motif-containing protein, mitochondrial	Lrpprc	-0.0485984	0.590523
T-complex protein 1 subunit gamma	Cct3	0.0215344	0.864862
Nuclear mitotic apparatus protein 1	Numa1	0.15311	0.309758
Vigilin	Hdlbp	-0.0768844	0.476305
Eukaryotic translation initiation factor 3 subunit A	Eif3a	-0.0537756	0.568696
Proteasome adapter and scaffold protein ECM29	Ecpas	-0.131883	0.45541
ATP-dependent RNA helicase DDX3X	Ddx3x	-0.0578477	0.554925
Arginine--tRNA ligase, cytoplasmic	Rars1	-0.0817891	0.537227
Afadin	Afdn	0.0611416	0.578523
Fructose-bisphosphate aldolase A	Aldoa	-0.190934	0.406307
Importin-5	Ipo5	-0.0740744	0.607196
Endoplasmin	Hsp90b1	-0.230113	0.225769
Trifunctional enzyme subunit alpha, mitochondrial	Hadha	-0.164844	0.411432
HEAT repeat-containing protein 1	Heatr1	-0.183815	0.374637
Uncharacterized protein	APOB	NA	NA
Cytoskeleton-associated protein 5	Ckap5	0.0697532	0.5593
Nucleolar RNA helicase 2	Ddx21	-0.0276244	0.771942
Alpha-actinin-1	Actn1	-0.0381063	0.716593
Coatomer subunit alpha	Copa	-0.10632	0.440544
Glucose-6-phosphate 1-dehydrogenase X	G6pdx	-0.135535	0.384181
Sarcoplasmic/endoplasmic reticulum calcium ATPase 2	Atp2a2	-0.0865758	0.435283
Coatomer subunit beta	Copb1	-0.0102883	0.928026
Eukaryotic translation initiation factor 4 gamma 1	Eif4g1	0.0996249	0.505037
Trifunctional purine biosynthetic protein adenosine-3	Gart	-0.0899345	0.561888
Phosphoglycerate kinase 1	Pgk1	-0.198713	0.391041
Heat shock protein 105 kDa	Hsph1	-0.110697	0.454157
Sodium/potassium-transporting ATPase subunit alpha-1	Atp1a1	-0.0132026	0.922966
Alpha-enolase	Eno1	-0.140064	0.5177
Protein RRP5 homolog	Pdcd11	-0.0723162	0.515889
Staphylococcal nuclease domain-containing protein 1	Snd1	-0.0109199	0.920479
Hexokinase-2	Hk2	-0.137474	0.308764
Small subunit processome component 20 homolog	Utp20	-0.111645	0.39958
Leucine--tRNA ligase, cytoplasmic	Lars1	-0.0334109	0.740185
ATP-dependent RNA helicase A	Dhx9	-0.0128195	0.910884
Structural maintenance of chromosomes protein 1A	Smc1a	0.118998	0.38449
Splicing factor 3B subunit 1	Sf3b1	-0.0660505	0.51579
Ubiquitin-like modifier-activating enzyme 1	Uba1	-0.0394905	0.663309
UDP-glucose:glycoprotein glucosyltransferase 1	Uggt1	-0.0482479	0.657134
Rab GDP dissociation inhibitor beta	Gdi2	-0.0168868	0.911295
Monofunctional C1-tetrahydrofolate synthase, mitochondrial	Mthfd1l	-0.197386	0.225769
DNA (cytosine-5)-methyltransferase 1	Dnmt1	0.0417025	0.657134
Bifunctional purine biosynthesis protein ATIC	Atic	-0.100279	0.497978
Transketolase	Tkt	-0.0377115	0.740741
Splicing factor, proline- and glutamine-rich	Sfpq	0.124818	0.5593
DNA topoisomerase 2-alpha	Top2a	0.112636	0.323515
CCR4-NOT transcription complex subunit 1	Cnot1	-0.00562232	0.96212
Splicing factor 3B subunit 3	Sf3b3	-0.030827	0.777314
Ribosome-binding protein 1	Rrbp1	-0.0978281	0.426189
E3 ubiquitin-protein ligase HUWE1	Huwe1	-1.94468	0.000635743
Structural maintenance of chromosomes protein 3	Smc3	0.163264	0.300537
Structural maintenance of chromosomes flexible hinge domain-containing protein 1	Smchd1	-0.12597	0.401509
DNA damage-binding protein 1	Ddb1	-0.0905362	0.484203
Fermitin family homolog 3	Fermt3	0.102881	0.404304
Endoplasmic reticulum chaperone BiP	Hspa5	-0.105123	0.487809
Hexokinase-1	Hk1	-0.146569	0.368904
Alanine--tRNA ligase, cytoplasmic	Aars1	0.0234836	0.867752
N-alpha-acetyltransferase 15, NatA auxiliary subunit	Naa15	-0.0804164	0.51644
T-complex protein 1 subunit alpha	Tcp1	-0.0158738	0.893318
Aconitate hydratase, mitochondrial	Aco2	0.0439489	0.761037
Lamin-B1	Lmnb1	0.0306509	0.8138
Protein disulfide-isomerase A3	Pdia3	-0.207729	0.289163
Alpha-actinin-4	Actn4	-0.109523	0.339973
Kinesin-1 heavy chain	Kif5b	0.0647835	0.514257
Valine--tRNA ligase	Vars1	0.0618344	0.578216
DNA replication licensing factor MCM6	Mcm6	0.0135156	0.910374
Cullin-associated NEDD8-dissociated protein 1	Cand1	0.0731352	0.440544
Lon protease homolog, mitochondrial	Lonp1	-0.00676074	0.952387
Spectrin alpha chain, non-erythrocytic 1	Sptan1	-0.0297229	0.909326
Phosphatidylinositol 3,4,5-trisphosphate 5-phosphatase 1	Inpp5d	-0.0597736	0.61183
Moesin	Msn	0.0937352	0.574867
T-complex protein 1 subunit beta	Cct2	0.00787676	0.941886
Adenylyl cyclase-associated protein 1	Cap1	-0.232385	0.297992
V-type proton ATPase catalytic subunit A	Atp6v1a	-0.0848431	0.571445
Transferrin receptor protein 1	Tfrc	-0.280442	0.268218
Early endosome antigen 1	Eea1	0.0537073	0.670226
T-complex protein 1 subunit theta	Cct8	-0.0660309	0.520431
Stress-70 protein, mitochondrial	Hspa9	-0.0847133	0.479937
Tubulin beta-2A chain	Tubb2a	-0.103779	0.74557
Heat shock protein HSP 90-alpha	Hsp90aa1	0.0192872	0.871023
6-phosphogluconate dehydrogenase, decarboxylating	Pgd	-0.142421	0.28467
DNA replication licensing factor MCM2	Mcm2	-0.00578382	0.952344
Isoleucine--tRNA ligase, cytoplasmic	Iars1	-0.10732	0.420514
T-complex protein 1 subunit epsilon	Cct5	-0.0526149	0.642685
RNA cytidine acetyltransferase	Nat10	-0.0822551	0.443273
E3 ubiquitin-protein ligase HECTD1	Hectd1	0.348671	0.233545
Elongation factor 1-alpha 1	Eef1a1	-0.0907481	0.60128
RNA cytosine C(5)-methyltransferase NSUN2	Nsun2	-0.0550776	0.658278
Nuclear pore complex protein Nup93	Nup93	-0.0332328	0.732657
Dynactin subunit 1	Dctn1	0.0226792	0.830561
Cytoplasmic FMR1-interacting protein 1	Cyfip1	-0.21883	0.385426
Major vault protein	Mvp	-0.0383658	0.802312
Protein PRRC2C	Prrc2c	-0.00357711	0.971857
Tyrosine-protein kinase BAZ1B	Baz1b	0.110585	0.3732
Filamin-C	Flnc	0.000763085	0.995435
Antiviral innate immune response receptor RIG-I	Ddx58	-0.287245	0.28467
Pre-mRNA-splicing factor ATP-dependent RNA helicase DHX15	Dhx15	-0.0694818	0.576757
Phosphoribosylformylglycinamidine synthase	Pfas	-0.0616586	0.591798
Unconventional myosin-XVIIIa	Myo18a	0.0200751	0.909793
2-oxoglutarate dehydrogenase, mitochondrial	Ogdh	-0.104304	0.410695
Glucose-6-phosphate isomerase	Gpi	-0.132353	0.455954
Tripeptidyl-peptidase 2	Tpp2	-0.0404729	0.699095
26S proteasome non-ATPase regulatory subunit 2	Psmd2	-0.113841	0.375709
Vinculin	Vcl	0.0049466	0.964645
Nucleoporin 205	Nup205	-0.018703	0.864661
Regulator of nonsense transcripts 1	Upf1	-0.00415936	0.972163
Creatine kinase B-type	Ckb	-0.0807593	0.469836
SWI/SNF-related matrix-associated actin-dependent regulator of chromatin subfamily A member 5	Smarca5	0.0693224	0.512805
DNA replication licensing factor MCM3	Mcm3	-0.0487741	0.619272
Peptidyl-prolyl cis-trans isomerase FKBP4	Fkbp4	0.00970935	0.939978
Tyrosine-protein phosphatase non-receptor type 6	Ptpn6	0.130972	0.336051
Tubulin alpha-1C chain	Tuba1c	-0.0864699	0.654886
Poly [ADP-ribose] polymerase 1	Parp1	0.0417217	0.760075
CCAAT/enhancer-binding protein zeta	Cebpz	-0.0484724	0.619336
Non-POU domain-containing octamer-binding protein	Nono	0.00822275	0.94515
Golgi autoantigen, golgin subfamily b, macrogolgin 1	Golgb1	-0.0242665	0.877697
ATP synthase subunit beta, mitochondrial	Atp5f1b	0.0185994	0.870751
C-1-tetrahydrofolate synthase, cytoplasmic	Mthfd1	-0.27424	0.330432
Exportin-2	Cse1l	0.0750082	0.5177
Protein disulfide-isomerase A4	Pdia4	-0.211932	0.250061
CAP-Gly domain-containing linker protein 1	Clip1	0.144688	0.315227
Structural maintenance of chromosomes protein 2	Smc2	0.0439096	0.63061
Nuclear migration protein nudC	Nudc	0.0986626	0.573696
Helicase with zinc finger domain 2	Helz2	-0.24895	0.309758
DNA-directed RNA polymerase II subunit RPB1	Polr2a	0.0669232	0.552679
T-complex protein 1 subunit delta	Cct4	-0.0644442	0.600688
Probable ATP-dependent RNA helicase DDX17	Ddx17	-0.0112226	0.916065
Probable ATP-dependent RNA helicase DDX5	Ddx5	0.0119497	0.909326
1-phosphatidylinositol 4,5-bisphosphate phosphodiesterase gamma-2	Plcg2	-0.00887309	0.926789
26S proteasome regulatory subunit 8	Psmc5	-0.0299749	0.761182
Endoplasmic reticulum aminopeptidase 1	Erap1	-0.160807	0.315227
26S proteasome regulatory subunit 6A	Psmc3	-0.106246	0.404949
DNA ligase 1	Lig1	0.163903	0.286059
Methionine--tRNA ligase, cytoplasmic	Mars1	-0.070722	0.608625
Exosome RNA helicase MTR4	Mtrex	-0.0158815	0.90659
Ubiquitin-like modifier-activating enzyme 6	Uba6	0.0124291	0.920479
Eukaryotic translation initiation factor 4 gamma 2	Eif4g2	-0.156034	0.298459
Polyadenylate-binding protein 1	Pabpc1	-0.197696	0.394371
DNA replication licensing factor MCM5	Mcm5	-0.0218131	0.830344
Gelsolin	Gsn	-0.165447	0.2841
Acetyl-CoA carboxylase 1	Acaca	0.0392794	0.717854
MICOS complex subunit Mic60	Immt	0.0430061	0.753032
Interleukin enhancer-binding factor 3	Ilf3	0.0247342	0.862851
Protein disulfide-isomerase	P4hb	-0.271535	0.289163
T-complex protein 1 subunit eta	Cct7	-0.0182425	0.909326
Hypoxia up-regulated protein 1	Hyou1	-0.099513	0.496614
Dihydropyrimidinase-related protein 2	Dpysl2	-0.0176894	0.877625
Lysine--tRNA ligase	Kars1	-0.0368374	0.738335
Cytosolic non-specific dipeptidase	Cndp2	-0.0762115	0.522338
E3 ubiquitin-protein ligase TRIP12	Trip12	0.40857	0.140559
Importin subunit beta-1	Kpnb1	-0.0191208	0.934085
Nucleolin	Ncl	-0.140472	0.426189
Protein mono-ADP-ribosyltransferase PARP14	Parp14	-0.503152	0.250061
Coiled-coil domain-containing protein 88B	Ccdc88b	0.196623	0.290527
Golgin subfamily A member 4	Golga4	0.101628	0.593254
NADPH--cytochrome P450 reductase	Por	-0.247013	0.250061
DnaJ heat shock protein family (Hsp40) member C13	Dnajc13	0.0624844	0.588942
Insulin-degrading enzyme	Ide	-0.0469267	0.615719
116 kDa U5 small nuclear ribonucleoprotein component	Eftud2	0.0305813	0.832879
Histone-binding protein RBBP7	Rbbp7	0.0583874	0.650795
Signal transducer and activator of transcription 1	Stat1	-0.337123	0.171278
EH domain-containing protein 4	Ehd4	0.00581009	0.955557
Ubiquitin carboxyl-terminal hydrolase 14	Usp14	0.0738166	0.466747
Exportin-1	Xpo1	0.0652645	0.562108
Nuclear pore complex protein Nup214	Nup214	-0.0069841	0.954387
Heme oxygenase 1	Hmox1	-0.868246	0.0276301
Rho guanine nucleotide exchange factor 2	Arhgef2	0.0656001	0.548
Cytosol aminopeptidase	Lap3	-0.123126	0.382667
Heat shock 70 kDa protein 4L	Hspa4l	0.00531589	0.974185
SWI/SNF complex subunit SMARCC1	Smarcc1	0.103351	0.443273
Nuclear pore complex protein Nup155	Nup155	-0.140341	0.384181
Serum albumin	ALB	NA	NA
Annexin A5	Anxa5	-0.181105	0.58342
Fumarate hydratase, mitochondrial	Fh	-0.0553329	0.799649
Neutral alpha-glucosidase AB	Ganab	-0.100045	0.448767
Serine/arginine repetitive matrix protein 2	Srrm2	-0.0992958	0.55825
Transcription intermediary factor 1-beta	Trim28	0.0783184	0.477594
Probable ubiquitin carboxyl-terminal hydrolase FAF-X	Usp9x	0.0904114	0.480233
ATP synthase subunit alpha, mitochondrial	Atp5f1a	0.0316463	0.805047
STE20-like serine/threonine-protein kinase	Slk	0.172697	0.336051
Nucleolar protein 56	Nop56	0.0153332	0.873848
DNA repair protein RAD50	Rad50	0.0540892	0.632011
Annexin A2	Anxa2	-0.233647	0.209985
Structural maintenance of chromosomes protein 4	Smc4	0.0618216	0.548052
Serrate RNA effector molecule homolog	Srrt	0.0270434	0.818443
Coatomer subunit beta'	Copb2	0.0318963	0.765243
2'-5'-oligoadenylate synthase 3	Oas3	-0.126019	0.375709
Thyroid hormone receptor-associated protein 3	Thrap3	0.0621344	0.703673
26S proteasome non-ATPase regulatory subunit 3	Psmd3	-0.061733	0.629693
Ubiquitin carboxyl-terminal hydrolase 5	Usp5	0.0288274	0.761595
Delta-1-pyrroline-5-carboxylate synthase	Aldh18a1	-0.271249	0.205576
Vesicle-fusing ATPase	Nsf	-0.104574	0.419779
DNA replication licensing factor MCM4	Mcm4	-0.176497	0.462368
Eukaryotic translation initiation factor 4 gamma 3	Eif4g3	0.0687543	0.652771
FACT complex subunit SPT16	Supt16h	0.103795	0.423071
Protein flightless-1 homolog	Flii	-0.0283364	0.820789
L-lactate dehydrogenase A chain	Ldha	-0.197308	0.404778
Symplekin	Sympk	0.0346526	0.746224
Glutamine--tRNA ligase	Qars1	-0.223403	0.426189
Serine hydroxymethyltransferase, mitochondrial	Shmt2	-0.173935	0.379032
Splicing factor 3b, subunit 2	Sf3b2	-0.0446157	0.653784
26S proteasome non-ATPase regulatory subunit 6	Psmd6	-0.0590114	0.663708
Annexin A1	Anxa1	-0.253387	0.228786
Glutamine--fructose-6-phosphate aminotransferase [isomerizing] 1	Gfpt1	-0.217605	0.250486
Clustered mitochondria protein homolog	Cluh	-0.0760418	0.589273
GRIP1-associated protein 1	Gripap1	0.0293189	0.811291
60S ribosomal protein L5	Rpl5	0.0706622	0.578216
Eukaryotic translation initiation factor 3 subunit C	Eif3c	-0.0611236	0.537383
Carboxypeptidase D	Cpd	-0.233431	0.339662
26S proteasome non-ATPase regulatory subunit 1	Psmd1	-0.0735765	0.600886
Kinectin	Ktn1	0.0469869	0.742353
NADH-ubiquinone oxidoreductase 75 kDa subunit, mitochondrial	Ndufs1	-0.042799	0.634861
Stress-induced-phosphoprotein 1	Stip1	-0.026656	0.779818
Elongation factor Tu, mitochondrial	Tufm	-0.0493826	0.64369
RuvB-like 1	Ruvbl1	0.0252641	0.822251
Malate dehydrogenase, mitochondrial	Mdh2	-0.240125	0.312671
Glycerol-3-phosphate dehydrogenase, mitochondrial	Gpd2	-0.0741623	0.503415
Switch-associated protein 70	Swap70	0.044402	0.652771
RuvB-like 2	Ruvbl2	-0.0196575	0.850037
THO complex subunit 2	Thoc2	-0.119329	0.429865
Receptor-type tyrosine-protein phosphatase C	Ptprc	0.121182	0.496614
Double-stranded RNA-specific adenosine deaminase	Adar	-0.329705	0.329654
Heterogeneous nuclear ribonucleoprotein U	Hnrnpu	-0.0144414	0.909326
DNA replication licensing factor MCM7	Mcm7	-0.137813	0.41303
Baculoviral IAP repeat-containing protein 6	Birc6	0.0164624	0.889167
Aldo-keto reductase family 1 member B1	Akr1b1	-0.504119	0.199576
Serotransferrin	TF	NA	NA
Probable ATP-dependent RNA helicase DDX46	Ddx46	0.048754	0.600886
La-related protein 1	Larp1	-0.163856	0.43227
Calnexin	Canx	0.0423146	0.748884
Cysteine--tRNA ligase, cytoplasmic	Cars1	-0.0197815	0.855877
Eukaryotic initiation factor 4A-I	Eif4a1	-0.0415383	0.712444
General vesicular transport factor p115	Uso1	-0.0112583	0.939265
Eukaryotic translation initiation factor 5B	Eif5b	0.143403	0.385426
Septin-2	Septin2	-0.0798706	0.520461
Heterogeneous nuclear ribonucleoprotein R	Hnrnpr	0.054086	0.615253
GMP synthase [glutamine-hydrolyzing]	Gmps	0.0502667	0.719269
AP-1 complex subunit beta-1	Ap1b1	-0.100883	0.414876
Heterogeneous nuclear ribonucleoprotein A1	Hnrnpa1	0.00327305	0.986982
Host cell factor 1	Hcfc1	-0.232795	0.404778
Calcium-binding mitochondrial carrier protein Aralar1	Slc25a12	-0.179481	0.462368
Asparagine--tRNA ligase, cytoplasmic	NARS1	0.000296093	0.997486
Eukaryotic translation initiation factor 3 subunit B	Eif3b	-0.0370375	0.754637
ATP-citrate synthase	Acly	0.0244826	0.861921
Unconventional myosin-Va	Myo5a	0.222815	0.228786
DnaJ homolog subfamily C member 7	Dnajc7	0.0303423	0.777572
Transducin beta-like protein 3	Tbl3	-0.201783	0.297992
Cullin-2	Cul2	0.0145336	0.916065
Ran GTPase-activating protein 1	Rangap1	0.311622	0.171278
Aspartate--tRNA ligase, cytoplasmic	Dars1	-0.041524	0.683421
Phosphoglucomutase-1	Pgm1	-0.204485	0.28467
Elongation factor G, mitochondrial	Gfm1	0.0295595	0.785358
Heterogeneous nuclear ribonucleoprotein L	Hnrnpl	-0.0476438	0.683421
GTP-binding protein 4	Gtpbp4	0.0259412	0.841708
Protein-tyrosine kinase 2-beta	Ptk2b	0.00301566	0.976778
Putative helicase MOV-10	Mov10	-0.27786	0.209985
Nodal modulator 1	Nomo1	-0.106045	0.404778
Prolyl endopeptidase	Prep	-0.0896698	0.578216
26S proteasome regulatory subunit 7	Psmc2	-0.0821873	0.454157
Protein mono-ADP-ribosyltransferase PARP9	Parp9	-0.434901	0.171278
Plexin-B2	Plxnb2	-0.0438425	0.687506
Golgin subfamily A member 3	Golga3	-0.207358	0.313532
Cold shock domain-containing protein E1	Csde1	0.0102663	0.933129
Programmed cell death 6-interacting protein	Pdcd6ip	0.0766195	0.458684
Pyruvate carboxylase, mitochondrial	Pc	-0.176145	0.390549
Serine/threonine-protein kinase PAK 2	Pak2	0.0262365	0.823315
ADP/ATP translocase 2	Slc25a5	-0.235297	0.51368
Protein RCC2	Rcc2	0.0533263	0.796178
Polypyrimidine tract-binding protein 1	Ptbp1	-0.268013	0.437163
60S ribosomal protein L3	Rpl3	-0.190728	0.497978
Enhancer of mRNA-decapping protein 4	Edc4	0.0614456	0.677241
Apolipoprotein B receptor	Apobr	0.226067	0.306561
Triosephosphate isomerase	Tpi1	-0.206733	0.462368
Coatomer subunit delta	Arcn1	-0.040674	0.698847
Reticulon-4	Rtn4	0.0479808	0.661442
Matrin-3	Matr3	-0.0394642	0.667725
ATP-dependent RNA helicase DDX1	Ddx1	-0.0211659	0.822251
Biorientation of chromosomes in cell division protein 1-like 1	Bod1l	0.192868	0.426006
Ubiquitin carboxyl-terminal hydrolase 7	Usp7	0.143043	0.404778
Ribonuclease inhibitor	Rnh1	0.0655115	0.680077
Vacuolar protein sorting-associated protein 35	Vps35	-0.010209	0.932945
WD repeat-containing protein 1	Wdr1	-0.159327	0.404304
Heterogeneous nuclear ribonucleoprotein K	Hnrnpk	0.110875	0.33944
RRP12-like protein	Rrp12	-0.159153	0.301478
Transcription elongation regulator 1	Tcerg1	-0.0128606	0.895146
Golgin subfamily A member 2	Golga2	-0.126981	0.322628
Proliferating cell nuclear antigen	Pcna	0.00531913	0.969184
Homeobox protein cut-like 1	Cux1	0.124784	0.489361
ATP-binding cassette sub-family F member 1	Abcf1	0.011058	0.929707
Threonine--tRNA ligase 1, cytoplasmic	Tars1	-0.10271	0.379032
Golgi apparatus protein 1	Glg1	0.0398148	0.679628
Sister chromatid cohesion protein PDS5 homolog A	Pds5a	0.147415	0.294568
Elongation factor 1-gamma	Eef1g	-0.102005	0.566227
Arf-GAP with Rho-GAP domain, ANK repeat and PH domain-containing protein 1	Arap1	0.0866524	0.516859
Presequence protease, mitochondrial	Pitrm1	-0.100201	0.410782
Eukaryotic translation initiation factor 3 subunit L	Eif3l	-0.0508073	0.699095
Probable ATP-dependent RNA helicase DDX27	Ddx27	-0.0612981	0.531906
Nuclear valosin-containing protein-like	Nvl	0.364882	0.142627
Nucleophosmin	Npm1	0.0221257	0.926789
UDP-N-acetylhexosamine pyrophosphorylase-like protein 1	Uap1l1	0.13236	0.286059
Rho guanine nucleotide exchange factor 1	Arhgef1	0.105955	0.367591
Cell division cycle 5-like protein	Cdc5l	-0.00165328	0.991235
Succinate dehydrogenase [ubiquinone] flavoprotein subunit, mitochondrial	Sdha	-0.06024	0.611675
NSFL1 cofactor p47	Nsfl1c	0.0122734	0.913424
Lipopolysaccharide-responsive and beige-like anchor protein	Lrba	-0.0189445	0.902554
Unconventional myosin-Ie	Myo1e	-0.109521	0.434744
Catalase	Cat	-0.17442	0.279524
Syntaxin-binding protein 1	Stxbp1	-0.0667314	0.531705
Calreticulin	Calr	-0.0848854	0.51469
N-acetylgalactosaminyltransferase 7	Galnt7	-0.266558	0.171472
26S proteasome non-ATPase regulatory subunit 11	Psmd11	-0.0488959	0.701636
A-kinase anchor protein 9	Akap9	0.0294232	0.858773
Dolichyl-diphosphooligosaccharide--protein glycosyltransferase subunit 1	Rpn1	-0.124451	0.375709
Nardilysin	Nrdc	-0.0448985	0.689963
Ankyrin repeat and KH domain-containing 1	Ankhd1	0.118651	0.454157
Rho guanine nucleotide exchange factor 7	Arhgef7	-0.21605	0.274488
Aspartate aminotransferase, mitochondrial	Got2	-0.0861899	0.429865
Proliferation-associated protein 2G4	Pa2g4	-0.0749854	0.522338
26S proteasome regulatory subunit 4	Psmc1	-0.0342903	0.811908
Guanine nucleotide-binding protein-like 3	Gnl3	0.150352	0.311186
Intersectin-2	Itsn2	-0.00808267	0.955485
Isocitrate dehydrogenase [NADP] cytoplasmic	Idh1	-0.0553655	0.579248
Obg-like ATPase 1	Ola1	-0.151868	0.443273
Heterogeneous nuclear ribonucleoprotein U-like protein 2	Hnrnpul2	0.0393641	0.676911
Polyribonucleotide nucleotidyltransferase 1, mitochondrial	Pnpt1	-0.27661	0.315227
Exportin-5	Xpo5	-0.0414265	0.669084
Protein transport protein Sec23B	Sec23b	-0.172815	0.375709
Serine--tRNA ligase, cytoplasmic	Sars1	-0.0720298	0.650795
Cation-independent mannose-6-phosphate receptor	Igf2r	0.129543	0.386943
Unconventional myosin-Id	Myo1d	-0.076224	0.470705
E3 ubiquitin-protein ligase UBR5	Ubr5	0.04521	0.877448
AP-3 complex subunit delta-1	Ap3d1	-0.102785	0.636069
AP-2 complex subunit alpha-1	Ap2a1	-0.0312646	0.7979
Deoxynucleoside triphosphate triphosphohydrolase SAMHD1	Samhd1	-0.072421	0.55438
Spliceosome RNA helicase Ddx39b	Ddx39b	-0.127072	0.322628
Thyroid hormone receptor interactor 11	Trip11	0.185268	0.481917
Dihydrolipoyllysine-residue acetyltransferase component of pyruvate dehydrogenase complex, mitochondrial	Dlat	-0.182584	0.314426
ATP-dependent RNA helicase DHX29	Dhx29	-0.030044	0.795768
Ubiquitin carboxyl-terminal hydrolase 4	Usp4	0.0617325	0.58205
Cytosolic phospholipase A2	Pla2g4a	-0.0218441	0.830344
Serine/threonine-protein phosphatase 2A 65 kDa regulatory subunit A alpha isoform	Ppp2r1a	0.0191675	0.919636
1-phosphatidylinositol 4,5-bisphosphate phosphodiesterase	Plcb4	0.0392098	0.711682
Long-chain-fatty-acid--CoA ligase 4	Acsl4	-0.0625698	0.591576
Protein diaphanous homolog 1	Diaph1	-0.177676	0.392475
26S proteasome regulatory subunit 10B	Psmc6	-0.0635597	0.51469
Exosome complex exonuclease RRP44	Dis3	-0.0218133	0.871023
Nucleolar protein 58	Nop58	-0.0624417	0.567742
Processing of 1, ribonuclease P/MRP family, (S. cerevisiae)	Pop1	0.0409642	0.74325
Probable RNA-binding protein 19	Rbm19	-0.0172512	0.890323
Isocitrate dehydrogenase [NAD] subunit, mitochondrial	Idh3b	-0.039795	0.678198
Eukaryotic translation initiation factor 5	Eif5	0.194727	0.394371
Rho GTPase-activating protein 45	Arhgap45	0.0837529	0.576826
ATPase family AAA domain-containing protein 3	Atad3	-0.0812618	0.467674
Protein arginine N-methyltransferase 1	Prmt1	-0.0991951	0.526421
Ataxin-10	Atxn10	-0.13865	0.323515
D-3-phosphoglycerate dehydrogenase	Phgdh	-0.0200144	0.861317
Tyrosine--tRNA ligase, cytoplasmic	Yars1	-0.0473792	0.668581
Platelet-activating factor acetylhydrolase IB subunit beta	Pafah1b1	-0.103417	0.453193
Constitutive coactivator of PPAR-gamma-like protein 1	FAM120A	0.0460934	0.618119
Pre-mRNA-processing factor 6	Prpf6	-0.0441535	0.701636
Actin-related protein 3	Actr3	0.0207375	0.86813
Transcription elongation factor SPT5	Supt5h	0.11245	0.404562
Nuclear cap-binding protein subunit 1	Ncbp1	0.0814705	0.517334
Leucyl-cystinyl aminopeptidase	Lnpep	-0.139344	0.440544
Exosome component 10	Exosc10	0.124681	0.379032
Transcription elongation factor SPT6	Supt6h	0.0311742	0.816703
Rho guanine nucleotide exchange factor 6	Arhgef6	-0.0718567	0.468549
Ubiquitin carboxyl-terminal hydrolase 15	Usp15	-0.0743847	0.537383
von Willebrand factor A domain-containing protein 5A	Vwa5a	-0.0629275	0.739607
Radixin	Rdx	-0.0703654	0.663184
Coatomer subunit gamma-1	Copg1	-0.262964	0.382308
Plasma membrane calcium-transporting ATPase 1	Atp2b1	-0.0495922	0.699095
Succinyl-CoA:3-ketoacid coenzyme A transferase 1, mitochondrial	Oxct1	-0.0187424	0.938364
Protein SON	Son	0.158233	0.429865
Asparagine synthetase [glutamine-hydrolyzing]	Asns	-0.083788	0.582631
Nuclear pore complex protein Nup98-Nup96	Nup98	-0.0706293	0.53842
Splicing factor 3A subunit 1	Sf3a1	-0.0157615	0.86618
60S ribosomal protein L4	Rpl4	-0.214823	0.487187
Alpha-soluble NSF attachment protein	Napa	0.118631	0.46535
Cis-aconitate decarboxylase	Acod1	-0.23844	0.41199
DnaJ homolog subfamily A member 1	Dnaja1	0.159829	0.46108
Nck-associated protein 1-like	Nckap1l	-0.121694	0.468894
Hsp70-binding protein 1	Hspbp1	-0.0713386	0.496912
Apoptotic chromatin condensation inducer in the nucleus	Acin1	-0.0391332	0.821805
Heterogeneous nuclear ribonucleoproteins A2/B1	Hnrnpa2b1	-0.113581	0.600688
Receptor of activated protein C kinase 1	Rack1	-0.225402	0.376686
WD40 repeat-containing protein SMU1	Smu1	-0.0339697	0.889072
Probable global transcription activator SNF2L2	Smarca2	0.201158	0.289163
Heterogeneous nuclear ribonucleoprotein A3	Hnrnpa3	-0.113084	0.501246
26S proteasome non-ATPase regulatory subunit 12	Psmd12	-0.10981	0.429865
Chloride intracellular channel protein 4	Clic4	0.0342324	0.821503
Eukaryotic translation initiation factor 3 subunit D	Eif3d	-0.0816516	0.496614
Adenosylhomocysteinase	Ahcy	0.107945	0.383253
Elongation factor 1-alpha 2	Eef1a2	-0.23158	0.367829
Protein transport protein Sec31A	Sec31a	-0.0854404	0.440842
Xaa-Pro aminopeptidase 1	Xpnpep1	-0.0386287	0.652771
Nuclear autoantigenic sperm protein	Nasp	0.0223867	0.84815
Signal recognition particle receptor subunit alpha	Srpra	-0.128926	0.409064
Cytospin-B	Specc1	0.0621512	0.622756
Zinc finger protein 638	Znf638	0.126296	0.443273
Eukaryotic translation initiation factor 3 subunit F	Eif3f	-0.277391	0.409525
Glutamate dehydrogenase 1, mitochondrial	Glud1	-0.0529624	0.58682
40S ribosomal protein S3	Rps3	-0.0417098	0.681612
Far upstream element-binding protein 2	Khsrp	0.0873303	0.570189
Inactive tyrosine-protein kinase PEAK1	Peak1	-0.120318	0.486704
Engulfment and cell motility protein 1	Elmo1	0.00545182	0.968502
Scaffold attachment factor B1	Safb	0.0774115	0.646907
Activating signal cointegrator 1 complex subunit 3	Ascc3	-0.0795402	0.636179
ATP-binding cassette sub-family E member 1	Abce1	-0.011035	0.934543
Condensin complex subunit 1	Ncapd2	-0.0875865	0.640577
Heat shock protein 75 kDa, mitochondrial	Trap1	-0.0350294	0.704349
Eukaryotic translation initiation factor 3 subunit I	Eif3i	-0.170873	0.297992
Ubiquitin carboxyl-terminal hydrolase 25	Usp25	-0.0420386	0.715532
Phosphatidylinositol-3-phosphatase SAC1	Sacm1l	-0.197318	0.297097
Cullin-3	Cul3	-0.0170439	0.89078
GTPase-activating protein and VPS9 domain-containing protein 1	Gapvd1	-0.000370687	0.996538
RNA polymerase-associated protein CTR9 homolog	Ctr9	-0.0441852	0.740284
SUMO-activating enzyme subunit 2	Uba2	0.0368173	0.766625
Peroxisomal multifunctional enzyme type 2	Hsd17b4	-0.144054	0.442462
Annexin A7	Anxa7	-0.18332	0.28467
Rho-associated protein kinase 1	Rock1	0.138165	0.322628
General transcription factor II-I	Gtf2i	0.17198	0.225769
Lupus La protein homolog	Ssb	-0.0819985	0.581262
DNA mismatch repair protein Msh6	Msh6	0.14273	0.32695
UMP-CMP kinase 2, mitochondrial	Cmpk2	-0.499317	0.171278
Protein phosphatase 1 regulatory subunit 7	Ppp1r7	0.0308264	0.795768
Pumilio homolog 3	Pum3	-0.0330992	0.802574
14-3-3 protein epsilon	Ywhae	0.0858448	0.610469
Peptidyl-prolyl cis-trans isomerase A	Ppia	0.179188	0.404304
Microtubule-associated protein 4	Map4	0.0559911	0.650795
Interferon-induced transmembrane protein 3	Ifitm3	-0.395746	0.310203
Cathepsin B	Ctsb	0.0138033	0.910085
ATP-dependent RNA helicase DDX42	Ddx42	-0.0101808	0.928185
Importin-7	Ipo7	-0.157386	0.525018
26S proteasome regulatory subunit 6B	Psmc4	-0.0885826	0.406773
V-type proton ATPase subunit B, brain isoform	Atp6v1b2	-0.0974355	0.578523
Thimet oligopeptidase	Thop1	-0.104828	0.454394
Protein Niban 2	Niban2	-0.215205	0.268218
Phosphoserine aminotransferase	Psat1	-0.187078	0.315227
ATP-binding cassette sub-family F member 2	Abcf2	0.020708	0.860578
Formin-like protein 1	Fmnl1	0.0123426	0.922178
26S proteasome non-ATPase regulatory subunit 13	Psmd13	-0.00844328	0.956463
Succinate--CoA ligase [GDP-forming] subunit beta, mitochondrial	Suclg2	0.0156564	0.898938
Heterogeneous nuclear ribonucleoprotein H	Hnrnph1	-0.0242794	0.848535
Centrosome-associated protein CEP250	Cep250	-0.143936	0.430915
Transport and Golgi organization protein 1 homolog	Mia3	0.0930351	0.558326
NFX1-type zinc finger-containing protein 1	Znfx1	0.0158598	0.912059
Glutaminase kidney isoform, mitochondrial	Gls	-0.0358064	0.877617
Leukotriene A-4 hydrolase	Lta4h	-0.0791672	0.515406
Catenin delta-1	Ctnnd1	0.0106765	0.930028
DNA topoisomerase 1	Top1	-0.0436855	0.619967
Septin-9	Septin9	-0.10762	0.452978
Nuclear pore membrane glycoprotein 210	Nup210	0.00258048	0.982664
Centromere/kinetochore protein zw10 homolog	Zw10	-0.0821279	0.56809
Histone H4	H4f16	-0.302132	0.3732
Serpin B6	Serpinb6	0.0232753	0.85306
Zinc finger CCCH domain-containing protein 11A	Zc3h11a	0.0306267	0.801695
Aminopeptidase B	Rnpep	-0.0227926	0.82893
Sorting nexin-9	Snx9	-0.125323	0.297992
Far upstream element-binding protein 1	Fubp1	0.247371	0.231921
Coiled-coil domain-containing protein 22	Ccdc22	-0.127758	0.359705
ATP-dependent 6-phosphofructokinase, platelet type	Pfkp	-0.0634065	0.532822
Short-chain specific acyl-CoA dehydrogenase, mitochondrial	Acads	-0.138294	0.525366
Cullin-1	Cul1	0.060545	0.704349
RNA helicase	Ddx23	0.0155509	0.876914
Eukaryotic translation initiation factor 3 subunit E	Eif3e	-0.0747098	0.598025
Tyrosine-protein phosphatase non-receptor type 23	Ptpn23	0.0742475	0.536545
Sodium/potassium-transporting ATPase subunit alpha-2	Atp1a2	NA	NA
Eukaryotic peptide chain release factor GTP-binding subunit ERF3A	Gspt1	-0.114658	0.502292
Hexokinase-3	Hk3	0.0403001	0.735101
Phospholipase A-2-activating protein	Plaa	0.000489296	0.995745
Ras GTPase-activating protein-binding protein 2	G3bp2	-0.163043	0.409064
FACT complex subunit SSRP1	Ssrp1	0.0261219	0.879811
Zinc phosphodiesterase ELAC protein 2	Elac2	-0.045078	0.647823
Eukaryotic translation initiation factor 2 subunit 2	Eif2s2	0.146419	0.456598
Dolichyl-diphosphooligosaccharide--protein glycosyltransferase subunit 2	Rpn2	-0.246969	0.225769
Ubiquitin carboxyl-terminal hydrolase 24	Usp24	-0.149453	0.578216
UDP-N-acetylglucosamine--peptide N-acetylglucosaminyltransferase 110 kDa subunit	Ogt	-0.0697602	0.595222
Carbonic anhydrase 2	Ca2	-0.213596	0.428511
Puromycin-sensitive aminopeptidase	Npepps	0.118547	0.355817
Integrator complex subunit 1	Ints1	0.00317477	0.982156
Pyridoxal-dependent decarboxylase domain-containing protein 1	Pdxdc1	0.098204	0.410782
Ubiquitin-like modifier-activating enzyme ATG7	Atg7	0.050631	0.611207
Poly(rC)-binding protein 1	Pcbp1	-0.211569	0.441711
Inositol 1,4,5-trisphosphate receptor type 3	Itpr3	-0.0994924	0.497751
DNA mismatch repair protein Msh2	Msh2	0.167089	0.287699
E3 ubiquitin-protein ligase BRE1A	Rnf20	0.139337	0.39958
Arf-GAP with coiled-coil, ANK repeat and PH domain-containing protein 2	Acap2	-0.0453905	0.770449
pre-rRNA 2'-O-ribose RNA methyltransferase FTSJ3	Ftsj3	0.0670146	0.537635
Integrin alpha-M	Itgam	0.0643982	0.749965
WD repeat-containing protein 75	Wdr75	-0.0918124	0.548
Centrosomal protein of 170 kDa	Cep170	-0.0590203	0.592345
Glycine amidinotransferase, mitochondrial	Gatm	-0.0345887	0.821179
Ras GTPase-activating protein-binding protein 1	G3bp1	-0.178706	0.517126
U4/U6.U5 tri-snRNP-associated protein 1	Sart1	0.0863618	0.595733
Interferon-activable protein 204	Ifi204	-0.145544	0.539071
Peptidyl-prolyl cis-trans isomerase D	Ppid	0.0287836	0.830344
ATP-dependent RNA helicase DDX24	Ddx24	-0.0680967	0.546767
Fructose-bisphosphate aldolase C	Aldoc	0.0979494	0.531124
ATP-dependent 6-phosphofructokinase, liver type	Pfkl	-0.139389	0.384181
Apolipoprotein A-I	APOA1	NA	NA
40S ribosomal protein S4, X isoform	Rps4x	-0.210372	0.41051
14-3-3 protein zeta/delta	Ywhaz	0.0964968	0.570189
Inverted formin-2	Inf2	-0.027198	0.846588
Histidine--tRNA ligase, cytoplasmic	Hars1	-0.0570499	0.668602
Eukaryotic initiation factor 4A-III	Eif4a3	0.010599	0.919173
Sorting nexin-1	Snx1	-0.00671501	0.94515
Prohibitin	Phb	-0.0364302	0.692478
Signal recognition particle subunit SRP68	Srp68	0.0530987	0.663184
Schlafen family member 5	Slfn5	-0.419789	0.383374
Beta-glucuronidase	Gusb	0.0657432	0.61183
BMS1 homolog, ribosome assembly protein (Yeast)	Bms1	-0.0385891	0.742862
RNA-binding protein 39	Rbm39	-0.132931	0.515889
NADH dehydrogenase [ubiquinone] flavoprotein 1, mitochondrial	Ndufv1	-0.0441161	0.78774
MORC family CW-type zinc finger protein 3	Morc3	-0.109504	0.433682
Band 4.1-like protein 2	Epb41l2	0.0103089	0.950036
Inosine-5'-monophosphate dehydrogenase 2	Impdh2	0.0828139	0.487187
Aldehyde dehydrogenase, mitochondrial	Aldh2	-0.0564419	0.833392
Nucleobindin-1	Nucb1	0.023497	0.879545
Protein LYRIC	Mtdh	0.044121	0.686619
Eukaryotic peptide chain release factor subunit 1	Etf1	-0.0453034	0.77651
Protein phosphatase 1 regulatory subunit 12A	Ppp1r12a	0.132817	0.383374
Phosphoinositide 3-kinase adapter protein 1	Pik3ap1	-0.11877	0.339973
Apoptosis inhibitor 5	Api5	0.125924	0.316325
Annexin A6	Anxa6	-0.0927627	0.453651
Macrophage-capping protein	Capg	-0.0162299	0.955265
Serine/threonine-protein phosphatase 2A catalytic subunit alpha isoform	Ppp2ca	-0.0872041	0.429865
Phosphatidylinositol 3,4,5-trisphosphate 5-phosphatase 2	Inppl1	-0.0504018	0.626037
Elongator complex protein 1	Elp1	-0.0380378	0.797563
Histone acetyltransferase type B catalytic subunit	Hat1	0.0653748	0.516701
GDP-mannose 4,6 dehydratase	Gmds	-0.15996	0.339973
DnaJ homolog subfamily C member 2	Dnajc2	-0.00655374	0.969432
Dynamin-like 120 kDa protein, mitochondrial	Opa1	-0.0669649	0.548865
T-complex protein 1 subunit zeta	Cct6a	-0.0569245	0.618296
Vacuolar protein sorting-associated protein 11 homolog	Vps11	-0.1444	0.438602
Tuftelin-interacting protein 11	Tfip11	0.0520155	0.742274
Transgelin-2	Tagln2	-0.211577	0.409525
DNA-directed RNA polymerase I subunit RPA1	Polr1a	-0.122692	0.529896
Aminopeptidase N	Anpep	-0.136283	0.394572
Hsp90 co-chaperone Cdc37	Cdc37	0.038519	0.836764
Chloride intracellular channel protein 1	Clic1	0.0344641	0.74325
Annexin A4	Anxa4	0.0440301	0.804542
Aspartyl/asparaginyl beta-hydroxylase	Asph	-0.450736	0.199576
NAD-dependent malic enzyme, mitochondrial	Me2	-0.265012	0.347533
Serine-threonine kinase receptor-associated protein	Strap	-0.0529604	0.589964
Phosphatidylinositol 4-phosphate 3-kinase C2 domain-containing subunit alpha	Pik3c2a	0.158248	0.384181
Actin-like protein 6A	Actl6a	0.123481	0.445641
Dynamin-1-like protein	Dnm1l	-0.226889	0.496614
Isocitrate dehydrogenase [NADP], mitochondrial	Idh2	0.178751	0.316325
Nuclear pore complex protein Nup160	Nup160	-0.106121	0.451689
Phenylalanine--tRNA ligase alpha subunit	Farsa	-0.0757578	0.443273
SAFB-like transcription modulator	Sltm	-0.0551911	0.663184
Gasdermin-D	Gsdmd	-0.0762719	0.644844
Interferon-induced protein with tetratricopeptide repeats 3	Ifit3	-0.0710725	0.875932
Heterogeneous nuclear ribonucleoprotein Q	Syncrip	0.11806	0.481251
V-type proton ATPase subunit H	Atp6v1h	-0.0555702	0.677954
U4/U6 small nuclear ribonucleoprotein Prp31	Prpf31	0.0292337	0.897794
Protein Niban 1	Niban1	-0.17682	0.287699
DNA topoisomerase 2-beta	Top2b	0.0574285	0.590828
Aspartate aminotransferase, cytoplasmic	Got1	-0.238348	0.363413
SUN domain-containing protein 2	Sun2	0.17773	0.335174
E1 ubiquitin-activating enzyme	Uba7	-0.347807	0.303012
Poly(U)-binding-splicing factor PUF60	Puf60	-0.0639917	0.632713
Rabankyrin-5	Ankfy1	-0.121974	0.435022
Cytoskeleton-associated protein 4	Ckap4	-0.101571	0.346721
ATP-dependent RNA helicase DHX30	Dhx30	-0.146316	0.393623
Neutrophil cytosol factor 2	Ncf2	-0.126885	0.486552
Serine/threonine-protein phosphatase PP1-alpha catalytic subunit	Ppp1ca	0.106992	0.440544
ADP-ribosylation factor 1	Arf1	-0.041959	0.816744
D-glutamate cyclase, mitochondrial	Dglucy	0.175052	0.325515
Sorting nexin-2	Snx2	-0.106515	0.406773
60S ribosomal protein L7	Rpl7	-0.386796	0.323515
WD repeat domain 36	Wdr36	-0.236209	0.268244
Nucleoporin 153	Nup153	-0.0374387	0.890256
DNA polymerase alpha catalytic subunit	Pola1	-0.013071	0.907037
CLIP-associating protein 2	Clasp2	-0.0292761	0.896934
Protein NDRG2	Ndrg2	-0.0904965	0.386119
Pinin	Pnn	0.174601	0.408389
Transportin-1	Tnpo1	-0.0707802	0.604922
Nuclear pore complex protein Nup133	Nup133	-0.129914	0.406307
Pre-mRNA-processing factor 40 homolog A	Prpf40a	0.0617251	0.673748
Nucleolar pre-ribosomal-associated protein 1	Urb1	-0.196554	0.375709
RNA-binding protein 28	Rbm28	-0.124954	0.360758
Pre-mRNA-processing factor 19	Prpf19	-0.110446	0.523608
Mitochondrial-processing peptidase subunit alpha	Pmpca	-0.0649944	0.637834
Aldo-keto reductase family 1 member A1	Akr1a1	0.0465089	0.753623
Tryptophan--tRNA ligase, cytoplasmic	Wars1	-0.00847608	0.93814
Poly(rC)-binding protein 2	Pcbp2	-0.115928	0.706484
Rab3 GTPase-activating protein non-catalytic subunit	Rab3gap2	-0.129564	0.384181
Beta-catenin-like protein 1	Ctnnbl1	-0.085384	0.624503
H/ACA ribonucleoprotein complex subunit DKC1	Dkc1	-0.0680281	0.568696
Calcium-binding mitochondrial carrier protein Aralar2	Slc25a13	-0.0269491	0.849161
Dynamin-2	Dnm2	0.0414554	0.706484
Proteasome activator complex subunit 1	Psme1	-0.0313651	0.774673
Fatty acid-binding protein 5	Fabp5	0.00423151	0.978095
Adenylosuccinate lyase	Adsl	-0.0923431	0.573696
E3 ubiquitin-protein ligase UHRF1	Uhrf1	0.0875808	0.437944
EH domain-containing protein 1	Ehd1	-0.0329206	0.770123
Annexin A11	Anxa11	-0.035947	0.784294
Adenylosuccinate synthetase isozyme 2	Adss2	-0.172044	0.391967
Spermidine synthase	Srm	-0.257581	0.231972
Sphingosine-1-phosphate lyase 1	Sgpl1	0.0207146	0.849467
Interferon-induced helicase C domain-containing protein 1	Ifih1	-0.359501	0.289163
Cell cycle and apoptosis regulator protein 2	Ccar2	-0.0893153	0.523608
Heat shock 70 kDa protein 14	Hspa14	0.00164701	0.990624
Oxygen-dependent coproporphyrinogen-III oxidase, mitochondrial	Cpox	-0.230696	0.453251
Integrin alpha-4	Itga4	-0.0828016	0.600886
Interferon-induced protein 44	Ifi44	-0.266192	0.171472
Dedicator of cytokinesis protein 8	Dock8	-0.0899167	0.567061
Phosphatidylinositol transfer protein alpha isoform	Pitpna	-0.0687546	0.654886
ATP-dependent RNA helicase DDX18	Ddx18	-0.166883	0.336051
3-ketoacyl-CoA thiolase A, peroxisomal	Acaa1a	-0.112023	0.419287
NADP-dependent malic enzyme	Me1	-0.394972	0.164784
WD repeat and HMG-box DNA-binding protein 1	Wdhd1	0.101048	0.406494
Vasodilator-stimulated phosphoprotein	Vasp	0.0647077	0.615778
Wings apart-like protein homolog	Wapl	0.135664	0.396775
WD repeat- and FYVE domain-containing protein 4	Wdfy4	-0.0673315	0.574131
Prohibitin-2	Phb2	-0.102748	0.450504
Coronin-1A	Coro1a	-0.0681847	0.541438
Beta-hexosaminidase subunit beta	Hexb	-0.0373884	0.818443
Pyruvate dehydrogenase E1 component subunit alpha, somatic form, mitochondrial	Pdha1	-0.0674341	0.538381
Guanine nucleotide-binding protein G(I)/G(S)/G(T) subunit beta-2	Gnb2	-0.0741765	0.58342
Caprin-1	Caprin1	0.0844005	0.584975
Voltage-dependent anion-selective channel protein 2	Vdac2	-0.110532	0.404304
Histone-binding protein RBBP4	Rbbp4	-0.00582473	0.962945
U3 small nucleolar RNA-associated protein 14 homolog A	Utp14a	-0.117036	0.406773
Phosphate carrier protein, mitochondrial	Slc25a3	-0.335289	0.43102
RNA-splicing ligase RtcB homolog	Rtcb	0.0366332	0.774888
Actin-related protein 2/3 complex subunit 2	Arpc2	-0.0275603	0.845883
Endoplasmic reticulum transmembrane helix translocase	Atp13a1	0.00563804	0.964645
RNA-binding protein 25	Rbm25	-0.00741577	0.966332
F-actin-capping protein subunit beta	Capzb	0.0508394	0.717774
Nesprin-3	Syne3	-0.104184	0.426006
C-Jun-amino-terminal kinase-interacting protein 4	Spag9	0.0247416	0.848535
CD166 antigen	Alcam	-0.0105872	0.935636
Drebrin-like protein	Dbnl	0.0369354	0.774695
Activator of 90 kDa heat shock protein ATPase homolog 1	Ahsa1	-0.0803305	0.460759
Deoxynucleotidyltransferase terminal-interacting protein 2	Dnttip2	0.248883	0.182559
AT-rich interactive domain-containing protein 1A	Arid1a	0.112718	0.479375
Ribonucleoside-diphosphate reductase large subunit	Rrm1	-0.0808209	0.536518
Purine nucleoside phosphorylase	Pnp	-0.0966816	0.584875
TP53-binding protein 1	Tp53bp1	0.0958141	0.606393
Echinoderm microtubule-associated protein-like 4	Eml4	0.0647054	0.650795
Leucine-rich repeat-containing protein 40	Lrrc40	-0.073848	0.541671
Probable ATP-dependent RNA helicase DDX56	Ddx56	-0.1972	0.493475
Inositol-3-phosphate synthase 1	Isyna1	-0.219027	0.462368
High mobility group nucleosome-binding domain-containing protein 5	Hmgn5	0.232943	0.481251
SUMO-activating enzyme subunit 1	Sae1	-0.0178812	0.882169
AP-3 complex subunit beta-1	Ap3b1	-0.0944111	0.5177
Uridine 5'-monophosphate synthase	Umps	-0.178572	0.379032
Nicotinamide phosphoribosyltransferase	Nampt	-0.0990088	0.375709
Glutaredoxin-3	Glrx3	-0.160766	0.473061
Apoptosis-inducing factor 1, mitochondrial	Aifm1	0.0742381	0.506075
Activity-dependent neuroprotector homeobox protein	Adnp	0.120693	0.430161
E3 ubiquitin/ISG15 ligase TRIM25	Trim25	-0.0216554	0.830725
Serine/threonine-protein kinase VRK1	Vrk1	0.103074	0.404778
Integrator complex subunit 13	IntS13	-0.0173781	0.905851
Nucleolar GTP-binding protein 2	Gnl2	-0.00613986	0.979857
Pre-mRNA-splicing factor SYF1	Xab2	-0.00794183	0.955557
Adenylate kinase 2, mitochondrial	Ak2	0.0797206	0.703786
Ubiquitin-protein ligase E3A	Ube3a	-0.123865	0.506075
Serine/threonine-protein kinase WNK1	Wnk1	0.0137129	0.924978
GPI transamidase component PIG-S	Pigs	-0.234254	0.404304
(E3-independent) E2 ubiquitin-conjugating enzyme UBE2O	Ube2o	0.0544956	0.650795
Splicing factor 3A subunit 3	Sf3a3	-0.0407696	0.699914
Cap-specific mRNA (nucleoside-2'-O-)-methyltransferase 1	Cmtr1	-0.104634	0.570189
Integrin beta-2	Itgb2	0.0554446	0.694674
Alpha-taxilin	Txlna	0.256712	0.268244
Telomere-associated protein RIF1	Rif1	0.13607	0.385451
Nuclear RNA export factor 7	Nxf7	-0.182518	0.423553
Cleavage and polyadenylation specificity factor subunit 2	Cpsf2	0.0691904	0.511782
FK506-binding protein 15	Fkbp15	0.0581156	0.738826
Replication protein A 70 kDa DNA-binding subunit	Rpa1	-0.0610322	0.7215
Phosphoglycerate mutase 1	Pgam1	-0.201357	0.380793
Ubiquitin conjugation factor E4 B	Ube4b	-0.0684267	0.588942
High mobility group protein B1	Hmgb1	-0.150205	0.608839
Chromodomain-helicase-DNA-binding protein 8	Chd8	0.138472	0.408018
Methionine aminopeptidase 2	Metap2	0.021803	0.886425
Signal recognition particle 54 kDa protein	Srp54	-0.0240776	0.84393
WASH complex subunit 4	Washc4	-0.0996461	0.513873
V-type proton ATPase subunit a	Tcirg1	-0.104063	0.454974
Epidermal growth factor receptor substrate 15	Eps15	0.0846985	0.641943
Anillin	Anln	0.237254	0.267488
Protein ERGIC-53	Lman1	-0.133148	0.289163
GRIP and coiled-coil domain-containing protein 2	Gcc2	-0.0222267	0.882676
4-alpha-glucanotransferase	Agl	-0.331255	0.204028
Lamin-B2	Lmnb2	0.0501755	0.758162
Procollagen-lysine,2-oxoglutarate 5-dioxygenase 1	Plod1	-0.178366	0.254397
Cohesin subunit SA-2	Stag2	0.0565999	0.758338
Acetyl-CoA acetyltransferase, mitochondrial	Acat1	0.0152867	0.909326
Chromosome-associated kinesin KIF4	Kif4	-0.0142904	0.922791
60S ribosomal protein L10a	Rpl10a	-0.113265	0.406494
Lymphocyte-specific helicase	Hells	0.0130619	0.946991
Protein phosphatase 1G	Ppm1g	0.0562311	0.752938
Plasminogen activator inhibitor 1 RNA-binding protein	Serbp1	0.0153818	0.947286
Protein S100-A10	S100a10	-0.508984	0.481251
Cyclin-dependent kinase 11B	Cdk11b	-0.0625613	0.596694
Tyrosine-protein kinase Lyn	Lyn	-0.0298051	0.823928
Cullin-4B	Cul4b	0.0315345	0.791588
Oxysterol-binding protein-related protein 8	Osbpl8	-0.241537	0.385426
Alpha-2-HS-glycoprotein	AHSG	NA	NA
Cathepsin D	Ctsd	-0.0141815	0.911307
Ribosomal protein S6 kinase alpha-1	Rps6ka1	0.0586335	0.600688
Nucleolar transcription factor 1	Ubtf	0.0624638	0.674992
Peroxiredoxin-1	Prdx1	-0.22615	0.347533
Tyrosine-protein kinase CSK	Csk	0.0365784	0.802612
Hematopoietic lineage cell-specific protein	Hcls1	-0.065732	0.542909
Very long-chain specific acyl-CoA dehydrogenase, mitochondrial	Acadvl	-0.187812	0.377818
Proteasome activator complex subunit 3	Psme3	0.0444198	0.615562
Rho-associated protein kinase 2	Rock2	0.111053	0.405906
Neutrophil cytosol factor 4	Ncf4	-0.109312	0.513854
Vacuolar protein sorting-associated protein 13A	Vps13a	-0.00158047	0.988438
Shootin-1	Shtn1	0.0600907	0.520775
Nucleolar protein 6	Nol6	-0.417904	0.363413
Ubiquitin-associated protein 2	Ubap2	0.00144503	0.991331
Tubulin beta-6 chain	Tubb6	-0.230701	0.424149
Stomatin-like protein 2, mitochondrial	Stoml2	0.00482651	0.978344
Cyclin-G-associated kinase	Gak	-0.0153524	0.932686
Putative RNA-binding protein Luc7-like 1	Luc7l	0.103753	0.382308
Glycine--tRNA ligase	Gars1	-0.131256	0.43227
Ubiquitin carboxyl-terminal hydrolase isozyme L5	Uchl5	-0.000870273	0.993257
Targeting protein for Xklp2	Tpx2	0.115427	0.46196
Rho guanine nucleotide exchange factor 10-like protein	Arhgef10l	-0.275549	0.297992
Calpain-2 catalytic subunit	Capn2	-0.0563833	0.802312
Lysosomal acid glucosylceramidase	Gba	-0.153739	0.408389
Alpha-mannosidase 2	Man2a1	-0.158408	0.463252
Ras-related protein Rab-7a	Rab7a	-0.0619438	0.545163
14-3-3 protein eta	Ywhah	0.09869	0.522338
Phosphatidylethanolamine-binding protein 1	Pebp1	0.0556872	0.549014
Disabled homolog 2	Dab2	-0.183454	0.289163
Nuclear fragile X mental retardation-interacting protein 2	Nufip2	0.0423271	0.748096
Nischarin	Nisch	0.0806297	0.663708
Sp110 nuclear body protein	Sp110	0.0571929	0.650795
Calcium homeostasis endoplasmic reticulum protein	Cherp	-0.0763329	0.711904
Importin-4	Ipo4	-0.256582	0.29283
Cleavage and polyadenylation specificity factor subunit 3	Cpsf3	-0.0591034	0.578216
Caspase-8	Casp8	-0.043208	0.802177
Hypoxanthine-guanine phosphoribosyltransferase	Hprt1	0.133858	0.410782
Keratin, type II cytoskeletal 1	KRT1	NA	NA
Tubulin--tyrosine ligase-like protein 12	Ttll12	-0.317405	0.268244
Polyadenylate-binding protein	Pabpc4	-0.148192	0.337346
Serine/threonine-protein phosphatase 2A 65 kDa regulatory subunit A beta isoform	Ppp2r1b	0.0769092	0.544286
RNA helicase	Dhx38	0.163485	0.473061
RNA-binding protein 14	Rbm14	-0.264301	0.483567
E3 UFM1-protein ligase 1	Ufl1	-0.0987649	0.506815
ATP-dependent RNA helicase DDX39A	Ddx39a	0.0246352	0.814909
Cytosolic acyl coenzyme A thioester hydrolase	Acot7	-0.174655	0.292429
U4/U6 small nuclear ribonucleoprotein Prp4	Prpf4	-0.157595	0.453957
V-type proton ATPase subunit C 1	Atp6v1c1	0.183847	0.297992
Protein transport protein Sec16A	Sec16a	-0.0541607	0.756914
Sortilin-related receptor	Sorl1	-0.178909	0.386905
40S ribosomal protein S6	Rps6	0.031527	0.816314
La-related protein 7	Larp7	0.000130872	0.998586
E3 ubiquitin-protein ligase BRE1B	Rnf40	0.18509	0.300537
Phosphatidylinositol 3,4,5-trisphosphate-dependent Rac exchanger 1 protein	Prex1	-0.0896479	0.564055
CLIP-associating protein 1	Clasp1	0.210909	0.292429
Formin-binding protein 1-like	Fnbp1l	0.143836	0.40699
Phenylalanine--tRNA ligase beta subunit	Farsb	-0.0408364	0.690384
Inhibitor of nuclear factor kappa-B kinase subunit beta	Ikbkb	0.0532226	0.677634
40S ribosomal protein SA	Rpsa	-0.120362	0.446384
Probable ATP-dependent RNA helicase DDX6	Ddx6	0.131022	0.418137
Serine/threonine-protein phosphatase 5	Ppp5c	-0.0933908	0.556904
Rho GDP-dissociation inhibitor 2	Arhgdib	0.0763693	0.619216
Tropomyosin alpha-4 chain	Tpm4	0.0199069	0.844669
WD repeat-containing protein 3	Wdr3	-0.224183	0.289163
Proteasome subunit beta type-8	Psmb8	-0.137264	0.386943
Actin-related protein 2	Actr2	-0.0591391	0.764428
Cytosolic purine 5'-nucleotidase	Nt5c2	0.134676	0.443261
DmX-like protein 1	Dmxl1	-0.102248	0.560397
Atlastin-3	Atl3	0.0546795	0.713606
Nuclear RNA export factor 1	Nxf1	-0.0485761	0.586716
UMP-CMP kinase	Cmpk1	0.0674717	0.551947
Cofilin-1	Cfl1	-0.0621584	0.799256
Ornithine aminotransferase, mitochondrial	Oat	-0.0985772	0.567009
Elongation factor 1-delta	Eef1d	-0.0860357	0.663184
40S ribosomal protein S3a	Rps3a	-0.239636	0.331862
NADH-cytochrome b5 reductase 3	Cyb5r3	0.0190088	0.89349
Acyl-coenzyme A thioesterase 9, mitochondrial	Acot9	-0.171974	0.406494
V-type proton ATPase subunit E 1	Atp6v1e1	0.134066	0.506075
Rho GTPase-activating protein 1	Arhgap1	0.0373239	0.832966
Fragile X mental retardation syndrome-related protein 1	Fxr1	0.177935	0.264059
CTTNBP2 N-terminal-like protein	Cttnbp2nl	0.0548199	0.671277
Ribosomal biogenesis protein LAS1L	Las1l	0.035426	0.761182
Kinesin-like protein KIF11	Kif11	0.198556	0.394641
Formin-binding protein 1	Fnbp1	0.156003	0.363413
Deubiquitinating protein VCPIP1	Vcpip1	0.0871793	0.54853
Thioredoxin-like protein 1	Txnl1	-0.284131	0.315227
RAS p21 protein activator 1	Rasa1	-0.160179	0.555481
Phosphatidylinositol-binding clathrin assembly protein	Picalm	-0.208181	0.404778
Interferon-induced, double-stranded RNA-activated protein kinase	Eif2ak2	-0.165315	0.289163
ATP-dependent translocase ABCB1	Abcb1b	-0.0901192	0.51368
Testin	Tes	0.0320256	0.810734
Serine/threonine-protein phosphatase 2A 56 kDa regulatory subunit	Ppp2r5d	0.0645057	0.665746
Integrator complex subunit 7	Ints7	0.0673153	0.610799
Solute carrier family 4 (anion exchanger), member 1, adaptor protein	Slc4a1ap	0.00906034	0.966332
Dihydrolipoyl dehydrogenase, mitochondrial	Dld	-0.146997	0.569064
DNA-directed RNA polymerase I subunit RPA2	Polr1b	-0.0786777	0.63733
Beta-adrenergic receptor kinase 1	Grk2	-0.142741	0.428916
Signal transducer and activator of transcription 3	Stat3	-0.226751	0.290937
Transcriptional regulator ATRX	Atrx	0.124594	0.419287
Transformation/transcription domain-associated protein	Trrap	0.0275819	0.912571
Nuclear pore complex protein Nup54	Nup54	-0.123454	0.502292
Catenin alpha-1	Ctnna1	0.195882	0.325515
Phosphatidylinositol 4-kinase alpha	Pi4ka	0.101552	0.488327
Leucine-rich repeat flightless-interacting protein 1	Lrrfip1	0.164429	0.382308
RNA helicase aquarius	Aqr	-0.075821	0.679622
Protein NDRG1	Ndrg1	-0.191299	0.297992
RNA polymerase II-associated factor 1 homolog	Paf1	0.0272797	0.824198
Heme oxygenase 2	Hmox2	-0.270558	0.330402
26S proteasome non-ATPase regulatory subunit 7	Psmd7	-0.0884174	0.506075
Recombining binding protein suppressor of hairless	Rbpj	-0.144426	0.297273
Developmentally-regulated GTP-binding protein 1	Drg1	0.150449	0.308042
Aldose reductase-related protein 2	Akr1b8	-0.699141	0.171278
40S ribosomal protein S15	Rps15	-0.028585	0.906874
ELAV-like protein 1	Elavl1	-0.105988	0.443273
Neutrophil cytosol factor 1	Ncf1	0.038613	0.667083
S-adenosylmethionine synthase isoform type-2	Mat2a	-0.100135	0.563168
Ubiquitin carboxyl-terminal hydrolase 19	Usp19	0.0866535	0.506142
Double-strand-break repair protein rad21 homolog	Rad21	0.166	0.326292
Phosphoenolpyruvate carboxykinase [GTP], mitochondrial	Pck2	-0.144972	0.458684
Transmembrane protein 214	Tmem214	-0.283118	0.209985
Serine/threonine-protein kinase TAO3	Taok3	0.0742284	0.654886
Ras-related protein Rab-14	Rab14	-0.0720062	0.56809
Heterogeneous nuclear ribonucleoprotein L-like	Hnrnpll	-0.0487797	0.642775
Probable 28S rRNA (cytosine-C(5))-methyltransferase	Nop2	-0.049722	0.774041
Cullin-5	Cul5	-0.0947545	0.404778
Isocitrate dehydrogenase [NAD] subunit alpha, mitochondrial	Idh3a	-0.0136757	0.911307
Actin-related protein 2/3 complex subunit 1B	Arpc1b	-0.118052	0.323515
Eukaryotic translation initiation factor 2 subunit 3, Y-linked	Eif2s3y	-0.0904109	0.555779
Nucleolar and coiled-body phosphoprotein 1	Nolc1	-0.103663	0.429865
Glucosidase 2 subunit beta	Prkcsh	-0.0529265	0.666621
Macrophage migration inhibitory factor	Mif	-0.339979	0.462368
Profilin-1	Pfn1	0.0580936	0.82893
Sodium/potassium-transporting ATPase subunit beta-3	Atp1b3	-0.0127667	0.927613
Transcription activator BRG1	Smarca4	0.242002	0.309758
Girdin	Ccdc88a	0.16085	0.481251
Sterol O-acyltransferase 1	Soat1	-0.19589	0.284491
Isoleucine--tRNA ligase, mitochondrial	Iars2	-0.157748	0.28467
RUN and FYVE domain-containing protein 1	Rufy1	0.0340113	0.749316
Gem-associated protein 5	Gemin5	-0.027276	0.843237
Nuclear pore complex protein Nup88	Nup88	-0.249216	0.454564
Importin-9	Ipo9	-0.0414754	0.839652
Vacuolar protein sorting-associated protein 16 homolog	Vps16	0.0302997	0.836764
Protein disulfide-isomerase A6	Pdia6	-0.0291218	0.870751
Plastin-3	Pls3	-0.22516	0.28467
Succinate dehydrogenase [ubiquinone] iron-sulfur subunit, mitochondrial	Sdhb	-0.118267	0.53842
ATP synthase subunit O, mitochondrial	Atp5po	-0.207963	0.51644
AMP deaminase 2	Ampd2	-0.0492672	0.654886
Unconventional myosin-Ic	Myo1c	-0.0194917	0.877448
Eukaryotic translation initiation factor 2B, subunit 3	Eif2b3	-0.0849352	0.462368
Calpain-1 catalytic subunit	Capn1	-0.0268219	0.86471
Ataxin-2-like protein	Atxn2l	-0.162895	0.340942
3-ketoacyl-CoA thiolase, mitochondrial	Acaa2	-0.136469	0.487021
Alkyldihydroxyacetonephosphate synthase, peroxisomal	Agps	-0.0320291	0.803429
Glycogen phosphorylase, brain form	Pygb	0.0188422	0.884127
Dedicator of cytokinesis protein 7	Dock7	-0.0139096	0.939978
Sorting nexin-4	Snx4	-0.000641059	0.995127
Histone deacetylase 1	Hdac1	0.0406935	0.689187
rRNA 2'-O-methyltransferase fibrillarin	Fbl	-0.090768	0.600886
Heterogeneous nuclear ribonucleoproteins C1/C2	Hnrnpc	-0.0150333	0.9171
Serine/threonine-protein kinase PAK 1	Pak1	-0.0488461	0.711904
Kinesin-like protein KIF2A	Kif2a	-0.0154037	0.895701
Alpha-1-antiproteinase	SERPINA1	NA	NA
Ubiquitin-conjugating enzyme E2 K	Ube2k	-0.00640289	0.96212
Nucleobindin-2	Nucb2	-0.107252	0.578523
Multifunctional procollagen lysine hydroxylase and glycosyltransferase LH3	Plod3	-0.308778	0.292429
Mitotic spindle assembly checkpoint protein MAD1	Mad1l1	0.0683027	0.61223
B-TFIID TATA-box-binding protein-associated factor 1	Btaf1	-0.0780822	0.578216
Serine/threonine-protein phosphatase 4 regulatory subunit 2	Ppp4r2	0.146903	0.443273
Sister chromatid cohesion protein PDS5 homolog B	Pds5b	0.0269477	0.848535
WASH complex subunit 2	Washc2	0.151929	0.426189
CYFIP-related Rac1 interactor B	Cyrib	-0.00954306	0.924461
Squamous cell carcinoma antigen recognized by T-cells 3	Sart3	0.0198137	0.895383
Non-SMC condensin I complex, subunit G	Ncapg	0.0932681	0.600688
Bromodomain adjacent to zinc finger domain protein 1A	Baz1a	0.172917	0.404304
Nipped-B-like protein	Nipbl	0.0811023	0.650852
Serine/threonine-protein phosphatase 2A 55 kDa regulatory subunit B alpha isoform	Ppp2r2a	-0.00366491	0.980505
Kinesin light chain 1	Klc1	0.0017686	0.990553
DNA ligase 3	Lig3	-0.0141364	0.928231
Heterogeneous nuclear ribonucleoprotein F	Hnrnpf	0.000485961	0.997536
Complement C3	C3	NA	NA
Poly(A) polymerase alpha	Papola	0.00277904	0.983255
tRNA (uracil-5-)-methyltransferase homolog A	Trmt2a	-0.215624	0.443273
Exportin-T	Xpot	0.0257589	0.845883
Probable ATP-dependent RNA helicase DDX20	Ddx20	-0.114672	0.530477
Maestro heat-like repeat family member 1	Mroh1	-0.146807	0.592345
60S ribosomal protein L6	Rpl6	-0.133313	0.458717
SLIT-ROBO Rho GTPase-activating protein 2	Srgap2	-0.0624656	0.661662
Keratin, type I cytoskeletal 9	KRT9	NA	NA
55 kDa erythrocyte membrane protein	Mpp1	-0.0638204	0.714343
Interferon-induced protein with tetratricopeptide repeats 1	Ifit1	-0.772358	0.142627
Protein argonaute-2	Ago2	-0.148083	0.435212
NAD(P) transhydrogenase, mitochondrial	Nnt	-0.104071	0.662325
Protein SDA1 homolog	Sdad1	-0.147947	0.348581
Guanine nucleotide-binding protein G(i) subunit alpha-2	Gnai2	0.0869513	0.454974
GEM-interacting protein	Gmip	0.112057	0.453193
Eukaryotic translation initiation factor 2A	Eif2a	-0.0181914	0.86832
ATP-dependent RNA helicase DDX54	Ddx54	-0.214684	0.421895
Dipeptidyl peptidase 3	Dpp3	-0.0117019	0.928231
TBC1 domain family member 15	Tbc1d15	-0.145356	0.471485
Toll-like receptor 7	Tlr7	0.00789399	0.941886
CTP synthase 1	Ctps1	-0.173307	0.437163
Nuclear pore glycoprotein p62	Nup62	-0.00705168	0.958141
Fibronectin type-III domain-containing protein 3A	Fndc3a	-0.190549	0.322628
Mitochondrial proton/calcium exchanger protein	Letm1	-0.169551	0.381666
Keratin, type II cytoskeletal 2 epidermal	KRT2	NA	NA
THUMP domain-containing protein 1	Thumpd1	0.00256535	0.985613
Calumenin	Calu	0.0202106	0.927613
Dolichyl-diphosphooligosaccharide--protein glycosyltransferase 48 kDa subunit	Ddost	-0.210437	0.38449
Bystin	Bysl	-0.0407108	0.645403
Striatin	Strn	-0.00535645	0.971857
Proteasome subunit alpha type-2	Psma2	-0.157457	0.515889
2-oxoisovalerate dehydrogenase subunit alpha, mitochondrial	Bckdha	0.032217	0.843567
Endoplasmic reticulum resident protein 29	Erp29	-0.0659271	0.733467
Synaptic vesicle membrane protein VAT-1 homolog	Vat1	0.0948062	0.571445
Sphingomyelin phosphodiesterase 4	Smpd4	-0.0526319	0.677634
Ribosomal L1 domain-containing protein 1	Rsl1d1	-0.213511	0.392975
Integrator complex subunit 4	Ints4	-0.0606784	0.721959
Nucleolar protein 14	Nop14	0.166285	0.339814
RNA-binding protein 5	Rbm5	0.131078	0.495903
Deoxyribose-phosphate aldolase	Dera	0.03033	0.787431
Melanoma inhibitory activity protein 2	Mia2	0.0436151	0.746224
Ras-related protein Rab-31	Rab31	-0.358978	0.297992
Sialic acid synthase	Nans	-0.02539	0.869475
Cytochrome b-c1 complex subunit 1, mitochondrial	Uqcrc1	-0.0526408	0.661704
Mitochondrial import receptor subunit TOM70	Tomm70	-0.0542031	0.74557
Pyruvate dehydrogenase E1 component subunit beta, mitochondrial	Pdhb	-0.043492	0.736531
Sorting nexin-5	Snx5	0.136304	0.39958
AP-2 complex subunit beta	Ap2b1	-0.175285	0.465034
Pleckstrin	Plek	0.0785228	0.667654
Developmentally-regulated GTP-binding protein 2	Drg2	-0.0637698	0.774673
Unconventional myosin-IXb	Myo9b	0.0176867	0.905851
Vacuolar protein sorting-associated protein 29	Vps29	-0.104758	0.773089
RNA-binding motif protein, X chromosome	Rbmx	-0.0530043	0.843756
Proteasome subunit alpha type-5	Psma5	-0.147151	0.367829
FYN-binding protein 1	Fyb1	-0.175731	0.289163
60S ribosomal protein L7a	Rpl7a	-0.140001	0.419287
Xaa-Pro dipeptidase	Pepd	0.0413528	0.67187
Elongation factor-like GTPase 1	Efl1	-0.0315593	0.852752
AFG3-like protein 2	Afg3l2	-0.192208	0.28467
Vacuolar protein sorting-associated protein 18 homolog	Vps18	0.1961	0.271037
Glyoxalase domain-containing protein 4	Glod4	0.0626617	0.712291
Inorganic pyrophosphatase	Ppa1	-0.20743	0.316325
Multifunctional protein ADE2	Paics	0.0853676	0.515889
Mitotic checkpoint protein BUB3	Bub3	-0.03408	0.836427
COP9 signalosome complex subunit 4	Cops4	-0.00703159	0.9401
Phosphatidylinositol transfer protein beta isoform	Pitpnb	0.0647883	0.4861
Protein misato homolog 1	Msto1	-0.0935223	0.514129
Transportin-3	Tnpo3	-0.0537424	0.808959
Tubulin-specific chaperone D	Tbcd	0.0510699	0.717774
Complex I assembly factor ACAD9, mitochondrial	Acad9	0.0310482	0.832257
Eukaryotic translation initiation factor 3 subunit H	Eif3h	0.0322873	0.79433
39S ribosomal protein L37, mitochondrial	Mrpl37	-0.0334123	0.845883
Eukaryotic translation initiation factor 3 subunit M	Eif3m	-0.19468	0.41837
5'-3' exoribonuclease 2	Xrn2	-0.132464	0.479921
Protein Red	Ik	0.12426	0.433937
Proto-oncogene vav	Vav1	0.0830727	0.443273
Tyrosine-protein kinase SYK	Syk	0.132211	0.443273
Nuclear export mediator factor Nemf	Nemf	0.0565093	0.663708
Serine/threonine-protein kinase Nek9	Nek9	0.0446847	0.765488
Leucine zipper protein 1	Luzp1	0.0703418	0.5177
Core histone macro-H2A.1	Macroh2a1	0.0194177	0.939978
Mitochondrial import inner membrane translocase subunit TIM44	Timm44	0.0761733	0.51406
Sterol carrier protein 2	Scp2	-0.301431	0.461929
AP-2 complex subunit mu	Ap2m1	-0.0732291	0.78618
Ubiquitin-associated protein 2-like	Ubap2l	0.0765687	0.588942
Transcription elongation factor A protein 1	Tcea1	0.225566	0.285955
Vacuolar protein sorting-associated protein 4B	Vps4b	0.141138	0.425974
Ubiquitin recognition factor in ER-associated degradation protein 1	Ufd1	-0.265343	0.435212
Vacuolar protein sorting-associated protein 41 homolog	Vps41	0.165643	0.3732
E3 ubiquitin-protein ligase listerin	Ltn1	0.0331576	0.802612
Tight junction protein ZO-2	Tjp2	0.0445167	0.802312
Tyrosine-protein kinase BTK	Btk	0.0767301	0.578216
ATP-dependent RNA helicase DDX19A;RNA helicase	Ddx19a;Ddx19b	0.000356338	0.996538
Transmembrane glycoprotein NMB	Gpnmb	-0.137141	0.433937
N-acetylneuraminate lyase	Npl	-0.32158	0.289163
[Protein ADP-ribosylarginine] hydrolase	Adprh	0.0186074	0.908635
COP9 signalosome complex subunit 2	Cops2	-0.0936794	0.61362
RNA-binding protein 15	Rbm15	-0.0865671	0.675929
Cleavage stimulation factor subunit 2	Cstf2	-0.0238584	0.85484
U3 small nucleolar RNA-associated protein 25 homolog	Utp25	-0.0652954	0.670163
Sodium bicarbonate cotransporter 3	Slc4a7	-0.30999	0.308042
Protein phosphatase methylesterase 1	Ppme1	-0.123571	0.339973
WD repeat-containing protein 11	Wdr11	0.131578	0.408618
NADH dehydrogenase [ubiquinone] iron-sulfur protein 2, mitochondrial	Ndufs2	-0.108308	0.447463
Pleiotropic regulator 1	Plrg1	-0.0625998	0.537635
Rho GDP-dissociation inhibitor 1	Arhgdia	0.157737	0.288974
DNA polymerase delta catalytic subunit	Pold1	-0.0474215	0.666385
E3 ubiquitin-protein ligase CHIP	Stub1	0.0115118	0.939153
Cullin-4A	Cul4a	0.160566	0.363413
Transcriptional repressor p66 alpha	Gatad2a	-0.0160574	0.929842
Replication factor C subunit 2	Rfc2	0.0124527	0.909326
Long-chain specific acyl-CoA dehydrogenase, mitochondrial	Acadl	0.00802684	0.96212
Protein PRRC2A	Prrc2a	0.144267	0.489361
Interleukin enhancer-binding factor 2	Ilf2	0.0779242	0.503513
Exocyst complex component 4	Exoc4	0.239388	0.394641
60S ribosomal protein L8	Rpl8	0.0220417	0.909793
Proteasome subunit beta type-4	Psmb4	0.0278918	0.82893
Acetoacetyl-CoA synthetase	Aacs	-0.0394354	0.77323
Probable JmjC domain-containing histone demethylation protein 2C	Jmjd1c	-0.0574872	0.734078
Alpha-2-macroglobulin receptor-associated protein	Lrpap1	-0.0148311	0.926945
Gephyrin	Gphn	0.109252	0.515406
Proteasome subunit alpha type-7	Psma7	-0.019626	0.858974
Signal transducing adapter molecule 2	Stam2	0.0564827	0.714121
Cell growth-regulating nucleolar protein	Lyar	-0.0854766	0.567296
LIM and SH3 domain protein 1	Lasp1	0.0107877	0.930313
Sequestosome-1	Sqstm1	-0.435139	0.200247
THO complex subunit 5 homolog	Thoc5	0.0130242	0.922936
Calcium-binding mitochondrial carrier protein SCaMC-1	Slc25a24	-0.366815	0.28467
Treacle protein	Tcof1	-0.0671611	0.5177
Keratin, type II cytoskeletal 6A	KRT6A	NA	NA
Tripartite motif-containing protein 14	Trim14	-0.3104	0.367829
OTU domain-containing protein 4	Otud4	0.147951	0.384181
Peroxiredoxin-6	Prdx6	-0.347256	0.339973
Annexin A3	Anxa3	-0.262164	0.209985
Kinesin light chain 2	Klc2	-0.0540129	0.730548
Calpain small subunit 1	Capns1	-0.0868433	0.590008
Zinc finger RNA-binding protein	Zfr	-0.0160608	0.874717
Protein lin-7 homolog C	Lin7c	-0.0987017	0.584073
Integrin beta-1	Itgb1	-0.031757	0.814909
AP-1 complex subunit gamma-1	Ap1g1	-0.0145693	0.903912
40S ribosomal protein S2	Rps2	-0.210417	0.456598
Ras-related protein Rab-5C	Rab5c	-0.0454309	0.725101
Tyrosine-protein phosphatase non-receptor type 12	Ptpn12	-0.206354	0.323515
F-actin-capping protein subunit alpha-1	Capza1	-0.0468204	0.844669
UV excision repair protein RAD23 homolog B	Rad23b	-0.135486	0.303012
Small nuclear ribonucleoprotein Sm D2	Snrpd2	0.138631	0.386943
Translationally-controlled tumor protein	Tpt1	0.0347283	0.82797
Mitogen-activated protein kinase 1	Mapk1	0.229188	0.276354
Eukaryotic translation initiation factor 5A-1	Eif5a	0.019694	0.905851
Casein kinase II subunit beta	Csnk2b	-0.106861	0.481251
Tubulin beta-4B chain	Tubb4b	-0.0829048	0.808637
Glutamate--cysteine ligase catalytic subunit	Gclc	-0.207883	0.28467
U4/U6.U5 tri-snRNP-associated protein 2	Usp39	-0.0550396	0.752191
Nucleolar protein 10	Nol10	-0.245363	0.299464
Prolyl 4-hydroxylase subunit alpha-1	P4ha1	-0.178639	0.297992
SEC23-interacting protein	Sec23ip	-0.00911075	0.947286
RNA-binding protein 26	Rbm26	0.0298435	0.795768
Nucleoporin NUP188	Nup188	-0.148673	0.467674
ATP-dependent RNA helicase SUPV3L1, mitochondrial	Supv3l1	-0.0730167	0.53589
Scaffold attachment factor B2	Safb2	0.0558701	0.651149
Sorting and assembly machinery component 50 homolog	Samm50	-0.256418	0.347533
VPS35 endosomal protein-sorting factor-like	Vps35l	-0.0240204	0.847957
Histone PARylation factor 1	Hpf1	-0.0163957	0.928444
PDZ and LIM domain protein 5	Pdlim5	0.0159612	0.926772
Pleckstrin homology domain-containing family O member 2	Plekho2	-0.0124995	0.916065
Procollagen galactosyltransferase 1	Colgalt1	-0.0087282	0.955265
Transaldolase	Taldo1	-0.0420028	0.775828
Leupaxin	Lpxn	-0.0364847	0.832766
E3 ubiquitin-protein ligase TRIM33	Trim33	0.0120529	0.911935
Ras-related protein Rab-5A	Rab5a	-0.0665908	0.61438
14-3-3 protein beta/alpha	Ywhab	-0.0272632	0.8138
SNW domain-containing protein 1	Snw1	-0.132784	0.487311
Ribonucleoprotein PTB-binding 1	Raver1	-0.166343	0.46108
BRCA2 and CDKN1A-interacting protein	Bccip	-0.0258149	0.844669
Protein SGT1 homolog	Sugt1	-0.0884012	0.429865
Calcyclin-binding protein	Cacybp	-0.116286	0.394371
Mitochondrial import receptor subunit TOM34	Tomm34	-0.0267271	0.891107
Transmembrane emp24 domain-containing protein 10	Tmed10	-0.0183041	0.909326
Cleavage and polyadenylation specificity factor subunit 1	Cpsf1	-0.180785	0.418823
Pescadillo homolog	Pes1	-0.0497123	0.716097
Protein O-GlcNAcase	Oga	0.0374463	0.883454
Geranylgeranyl transferase type-2 subunit alpha	Rabggta	-0.0797911	0.519525
ATP-dependent Clp protease ATP-binding subunit clpX-like, mitochondrial	Clpx	-0.15435	0.450504
S-formylglutathione hydrolase	Esd	-0.387179	0.140559
Regulator of nonsense transcripts 2	Upf2	-0.0199571	0.901129
A-kinase anchor protein 13	Akap13	0.228959	0.496614
Multidrug resistance-associated protein 1	Abcc1	-0.216186	0.404304
14-3-3 protein gamma	Ywhag	-0.0215485	0.890932
14-3-3 protein theta	Ywhaq	0.0626512	0.558326
Far upstream element (FUSE)-binding protein 3	Fubp3	-0.0592641	0.595278
U3 small nucleolar RNA-associated protein 18 homolog	Utp18	0.0824264	0.610799
Voltage-dependent anion-selective channel protein 1	Vdac1	-0.250226	0.318422
Protein VAC14 homolog	Vac14	0.0966533	0.452322
Phostensin	Ppp1r18	0.053424	0.719914
Dedicator of cytokinesis protein 10	Dock10	-0.0235144	0.911295
Cleft lip and palate transmembrane protein 1 homolog	Clptm1	0.0610995	0.552477
Nicalin	Ncln	-0.145759	0.290937
Ribosomal RNA processing protein 1 homolog B	Rrp1b	-0.0722551	0.643194
Acid ceramidase	Asah1	0.00694911	0.978095
Protein kinase C and casein kinase substrate in neurons protein 2	Pacsin2	-0.137263	0.336051
Glucosamine-6-phosphate isomerase 1	Gnpda1	0.0944272	0.525701
ATP-dependent zinc metalloprotease YME1L1	Yme1l1	-0.106511	0.383374
Superoxide dismutase [Mn], mitochondrial	Sod2	-0.184687	0.467674
Anaphase-promoting complex subunit 1	Anapc1	-0.267726	0.375709
Ubiquitin-40S ribosomal protein S27a	Rps27a	-0.0868199	0.740185
Ribosome biogenesis protein BOP1	Bop1	-0.201813	0.209985
Leucine-rich repeat-containing protein 47	Lrrc47	0.00317642	0.985282
Ubiquitin-like protein ISG15	Isg15	-0.388425	0.21786
Protein scribble homolog	Scrib	-0.0311882	0.839901
ER membrane protein complex subunit 1	Emc1	-0.191511	0.309758
DNA-directed RNA polymerase II subunit RPB2	Polr2b	0.0853151	0.497978
Fatty acyl-CoA reductase 1	Far1	-0.0645322	0.722288
Signal-transducing adaptor protein 1	Stap1	0.26337	0.214604
Septin-6	Septin6	-0.087253	0.468549
Cysteine desulfurase, mitochondrial	Nfs1	-0.11084	0.375709
Macrophage-expressed gene 1 protein	Mpeg1	-0.0232859	0.926195
Kinesin-like protein	Kifc5b	0.157552	0.286059
AP-2 complex subunit alpha-2	Ap2a2	-0.176691	0.404778
AP-1 complex subunit mu-1	Ap1m1	-0.0702917	0.761037
Lipoamide acyltransferase component of branched-chain alpha-keto acid dehydrogenase complex, mitochondrial	Dbt	-0.197309	0.5177
Mortality factor 4-like protein 1	Morf4l1	0.304695	0.191941
Arsenite methyltransferase	As3mt	-0.00695712	0.953757
28S ribosomal protein S22, mitochondrial	Mrps22	0.0144527	0.892756
Ribosome biogenesis protein WDR12	Wdr12	-0.107581	0.357325
THUMP domain-containing protein 3	Thumpd3	-0.191648	0.279524
WD repeat-containing protein 70	Wdr70	-0.0501416	0.801199
E3 ubiquitin-protein ligase DTX3L	Dtx3l	-0.218569	0.468283
Protein PML	Pml	-0.197367	0.289163
Docking protein 3	Dok3	-0.289256	0.171278
FYVE, RhoGEF and PH domain-containing protein 3	Fgd3	-0.235806	0.315227
Importin subunit alpha-1	Kpna2	0.0552769	0.82848
Serine/threonine-protein phosphatase 4 regulatory subunit 3A	Ppp4r3a	-0.0176348	0.889072
Rho GTPase-activating protein 25	Arhgap25	0.167912	0.289163
Chromosome alignment-maintaining phosphoprotein 1	Champ1	0.0882083	0.506815
Omega-amidase NIT2	Nit2	-0.148909	0.406773
26S proteasome non-ATPase regulatory subunit 14	Psmd14	-0.160889	0.367829
B-cell receptor-associated protein 31	Bcap31	0.00209195	0.987012
Protein polybromo-1	Pbrm1	-0.00351794	0.975955
WD repeat-containing protein 18	Wdr18	-0.0589158	0.592771
N-alpha-acetyltransferase 25, NatB auxiliary subunit	Naa25	-0.159961	0.406854
ARF GTPase-activating protein GIT2	Git2	0.00852925	0.947286
Peptidyl-prolyl cis-trans isomerase B	Ppib	-0.0646916	0.593254
Rab GDP dissociation inhibitor alpha	Gdi1	-0.0800686	0.618751
Tensin-3	Tns3	-0.184047	0.329654
Protein ELYS	Ahctf1	0.175349	0.383374
Inter-alpha-trypsin inhibitor heavy chain H3	ITIH3	NA	NA
Y-box-binding protein 1	Ybx1	-0.0730554	0.468679
Translocon-associated protein subunit delta	Ssr4	-0.292392	0.250061
Nuclear pore complex protein Nup107	Nup107	-0.0896117	0.504409
Bleomycin hydrolase	Blmh	-0.0522862	0.82797
RNA polymerase-associated protein RTF1 homolog	Rtf1	0.205989	0.289163
N-myc-interactor	Nmi	-0.224501	0.399657
DDB1- and CUL4-associated factor 13	Dcaf13	-0.212798	0.231921
Torsin-3A	Tor3a	-0.339022	0.209985
4F2 cell-surface antigen heavy chain	Slc3a2	-0.242065	0.279524
Lamina-associated polypeptide 2, isoforms alpha/zeta	Tmpo	0.0421676	0.77651
Putative RNA-binding protein Luc7-like 2	Luc7l2	0.0260249	0.897794
Eukaryotic translation initiation factor 4B	Eif4b	0.0575667	0.615253
Paxillin	Pxn	-0.0896172	0.582631
4-trimethylaminobutyraldehyde dehydrogenase	Aldh9a1	-0.20421	0.443273
Heat shock 70 kDa protein 1B;Heat shock 70 kDa protein 1A	Hspa1b;Hspa1a	-0.0291841	0.830148
Beta-enolase	Eno3	-0.00129977	0.995127
DEAH (Asp-Glu-Ala-His) box polypeptide 37	Dhx37	0.0221437	0.909326
Protein bicaudal D homolog 2	Bicd2	-0.0910223	0.478037
40S ribosomal protein S17	Rps17	-0.152718	0.522338
U4/U6 small nuclear ribonucleoprotein Prp3	Prpf3	0.0589892	0.5177
Heterogeneous nuclear ribonucleoprotein A/B	Hnrnpab	-0.196802	0.506075
Ferritin light chain 1	Ftl1	0.0759612	0.689963
MAP kinase-activated protein kinase 2	Mapkapk2	-0.146131	0.404304
Golgi-specific brefeldin A-resistance factor 1	Gbf1	-0.0432523	0.771942
2'-5' oligoadenylate synthase	Oas1g	-0.367679	0.224659
Mitotic checkpoint serine/threonine-protein kinase BUB1 beta	Bub1b	0.218602	0.29283
X-ray repair cross-complementing protein 6	Xrcc6	0.0708337	0.522338
Nuclear factor NF-kappa-B p105 subunit	Nfkb1	0.0457158	0.757834
Extended synaptotagmin-1	Esyt1	-0.181326	0.297992
Guanylate-binding protein 4	Gbp4	-0.200755	0.588942
Translocation protein SEC63 homolog	Sec63	-0.304206	0.383374
Opioid growth factor receptor	Ogfr	-0.071699	0.556904
Coatomer subunit gamma-2	Copg2	0.00933352	0.942942
Nuclear receptor coactivator 5	Ncoa5	0.0519911	0.727502
40S ribosomal protein S7	Rps7	-0.255445	0.43227
Tax1-binding protein 1 homolog	Tax1bp1	0.135062	0.495903
Pseudouridylate synthase 7 homolog	Pus7	-0.197758	0.51644
Serine/threonine-protein kinase 10	Stk10	-0.134267	0.355428
Elongation factor 1-beta	Eef1b	-0.0468329	0.761013
Very-long-chain 3-oxoacyl-CoA reductase	Hsd17b12	-0.194727	0.454974
Alpha-N-acetylglucosaminidase	Naglu	-0.0340485	0.875932
Keratin, type I cytoskeletal 10	KRT10	NA	NA
Protein-L-isoaspartate(D-aspartate) O-methyltransferase	Pcmt1	0.0326854	0.749965
Splicing factor U2AF 65 kDa subunit	U2af2	-0.124015	0.408389
Acid sphingomyelinase-like phosphodiesterase 3b	Smpdl3b	0.0782928	0.496614
Histidine triad nucleotide-binding protein 1	Hint1	-0.0836308	0.74557
N-acylglucosamine 2-epimerase	Renbp	-0.1331	0.58656
Paired amphipathic helix protein Sin3a	Sin3a	0.105562	0.454157
Heterogeneous nuclear ribonucleoprotein D0	Hnrnpd	-0.126315	0.610175
Zinc finger protein ZPR1	Zpr1	-0.152968	0.289163
Protein disulfide-isomerase TMX3	Tmx3	0.0247965	0.821805
Trafficking protein particle complex subunit 12	Trappc12	0.0914428	0.552645
Nuclear pore complex protein Nup85	Nup85	-0.00169225	0.989636
Beta-centractin	Actr1b	-0.0704338	0.697552
Huntingtin-interacting protein 1	Hip1	0.0556879	0.657134
Aminoacylase-1	Acy1	0.200325	0.250486
RNA transcription, translation and transport factor protein	RTRAF	-0.0414186	0.739607
Serine/arginine-rich splicing factor 9	Srsf9	0.438094	0.201637
Dihydrolipoyllysine-residue succinyltransferase component of 2-oxoglutarate dehydrogenase complex, mitochondrial	Dlst	0.11261	0.526484
NADH dehydrogenase [ubiquinone] iron-sulfur protein 3, mitochondrial	Ndufs3	0.00945124	0.944765
Acylglycerol kinase, mitochondrial	Agk	-0.208768	0.423553
Tropomodulin-3	Tmod3	0.114571	0.410782
Serine/threonine-protein kinase 3	Stk3	0.00808329	0.966212
Vesicle-associated membrane protein-associated protein B	Vapb	-0.172897	0.253157
DnaJ homolog subfamily B member 12	Dnajb12	0.0127346	0.944765
Succinate--CoA ligase [ADP-forming] subunit beta, mitochondrial	Sucla2	-0.148559	0.446384
Tetratricopeptide repeat domain 37	Ttc37	-0.0461981	0.7519
Histone H2B type 1-M;Histone H2B type 1-H;Histone H2B type 2-B;Histone H2B type 1-C/E/G	H2bc14;H2bc9;Hist2h2bb;H2bc8	-0.424899	0.451689
Galectin-3	Lgals3	-0.280529	0.404304
Serine hydroxymethyltransferase, cytosolic	Shmt1	0.0903264	0.502292
Aldehyde dehydrogenase family 16 member A1	Aldh16a1	0.0110912	0.923159
Transcription termination factor 2	Ttf2	0.376571	0.209985
Active breakpoint cluster region-related protein	Abr	-0.0397371	0.836548
Peptidyl-prolyl cis-trans isomerase FKBP3	Fkbp3	-0.0610077	0.738779
Peptidyl-prolyl cis-trans isomerase FKBP5	Fkbp5	0.123022	0.4745
Erlin-2	Erlin2	-0.0364025	0.756213
Armadillo repeat-containing protein 6	Armc6	0.0178278	0.91343
von Willebrand factor A domain-containing protein 8	Vwa8	0.0147246	0.918205
Vam6/Vps39-like protein	Vps39	0.0979578	0.44579
Argininosuccinate lyase	Asl	0.016484	0.888992
Citrate synthase, mitochondrial	Cs	0.0272626	0.852465
39S ribosomal protein L45, mitochondrial	Mrpl45	0.0581664	0.534608
DnaJ homolog subfamily C member 10	Dnajc10	-0.214784	0.301478
Golgin subfamily A member 5	Golga5	-0.00326449	0.976778
Transducin beta-like protein 2	Tbl2	-0.167063	0.375709
Pericentriolar material 1 protein	Pcm1	0.151456	0.55438
Coronin-1C	Coro1c	-0.00468471	0.965448
Sec24-related gene family, member C (S. cerevisiae)	Sec24c	-0.149648	0.600688
Casein kinase II subunit alpha'	Csnk2a2	0.052226	0.617285
Septin-7	Septin7	-0.00188778	0.98604
Crooked neck-like protein 1	Crnkl1	0.0658425	0.55438
E3 ubiquitin-protein ligase RBBP6	Rbbp6	0.125857	0.399465
Proteasome activator complex subunit 4	Psme4	0.0354611	0.906082
Nucleosome assembly protein 1-like 4	Nap1l4	-0.0414429	0.739607
ERO1-like protein alpha	Ero1a	-0.156895	0.383374
Leucine-rich repeat-containing protein 59	Lrrc59	-0.202496	0.268218
Ran-binding protein 3	Ranbp3	-0.261655	0.405906
Peptidyl-prolyl cis-trans isomerase NIMA-interacting 4	Pin4	0.0304973	0.821703
General transcription factor IIE subunit 1	Gtf2e1	0.21617	0.323515
1,4-alpha-glucan-branching enzyme	Gbe1	-0.126018	0.384181
28S ribosomal protein S29, mitochondrial	Dap3	-0.153221	0.410782
DENN domain-containing protein 4C	Dennd4c	0.0466617	0.701636
Protein IMPACT	Impact	0.14724	0.394641
Pericentrin	Pcnt	0.0356733	0.880419
Eukaryotic translation initiation factor 3 subunit J-A	Eif3j1	0.0970355	0.621555
RNA-binding protein 27	Rbm27	0.135155	0.443273
Epidermal growth factor receptor substrate 15-like 1	Eps15l1	0.0216696	0.889167
Sepiapterin reductase	Spr	-0.103718	0.741613
Coiled-coil and C2 domain-containing protein 1B	Cc2d1b	0.0796915	0.550826
Probable ATP-dependent RNA helicase DDX47	Ddx47	0.114438	0.454974
Exportin-7	Xpo7	0.0364805	0.820429
YLP motif-containing protein 1	Ylpm1	0.0543493	0.649963
SH3 and PX domain-containing protein 2B	Sh3pxd2b	0.0481972	0.740649
Synaptosomal-associated protein 23	Snap23	-0.107892	0.56444
Plasminogen	PLG	NA	NA
Caspase-1	Casp1	-0.263764	0.220808
Growth arrest-specific protein 7	Gas7	0.0997952	0.423553
Sodium/potassium-transporting ATPase subunit alpha-3	Atp1a3	-0.204232	0.370899
Tudor and KH domain-containing protein	Tdrkh	-0.122356	0.488908
Nucleolar protein 9	Nop9	-0.098632	0.528813
Ubiquitin carboxyl-terminal hydrolase 47	Usp47	-0.129384	0.51368
mRNA export factor	Rae1	0.0520485	0.643671
Guanine nucleotide exchange factor for Rab-3A	Rab3il1	-0.0306447	0.859317
Farnesyl pyrophosphate synthase	Fdps	-0.0350465	0.749965
Electron transfer flavoprotein subunit alpha, mitochondrial	Etfa	-0.00614081	0.961647
Tropomyosin 3, related sequence 7	Tpm3-rs7	-0.0313398	0.897339
Chromodomain-helicase-DNA-binding protein 1	Chd1	0.0814375	0.564373
Calpastatin	Cast	0.02646	0.911307
Ras-related protein Rab-2A	Rab2a	-0.0554169	0.756213
Aladin	Aaas	-0.30376	0.390287
60S ribosomal protein L10	Rpl10	0.0040617	0.979857
Cytochrome P450 20A1	Cyp20a1	-0.194827	0.411322
Microtubule-associated protein 1S	Map1s	-0.0651685	0.669863
Interferon-induced protein 44-like	Ifi44l	-0.382578	0.200318
Protein AATF	Aatf	0.128265	0.53744
Trafficking protein particle complex subunit 11	Trappc11	0.0062677	0.969432
FRY-like transcription coactivator	Fryl	0.109951	0.568696
E3 ubiquitin-protein ligase UBR2	Ubr2	-0.132835	0.395893
Sec1 family domain-containing protein 1	Scfd1	-0.0928883	0.531124
Cytoplasmic dynein 1 light intermediate chain 1	Dync1li1	-0.00553231	0.956463
Methionine adenosyltransferase 2 subunit beta	Mat2b	-0.0539971	0.713104
Phosphatidylinositol 4-kinase type 2-alpha	Pi4k2a	-0.022219	0.932686
Replication factor C subunit 1	Rfc1	0.15029	0.339973
Pre-rRNA-processing protein TSR1 homolog	Tsr1	-0.0458183	0.72262
Serine/threonine-protein kinase OSR1	Oxsr1	0.1409	0.398025
TBC1 domain family member 5	Tbc1d5	0.11823	0.42393
Golgi resident protein GCP60	Acbd3	-0.162174	0.382308
Liprin-beta-1	Ppfibp1	0.0704422	0.558353
Zinc finger CCCH domain-containing protein 13	Zc3h13	0.00209679	0.990624
Signal-induced proliferation-associated protein 1	Sipa1	0.136369	0.390881
Prostaglandin G/H synthase 2	Ptgs2	-1.25282	0.171278
tRNA (guanine(26)-N(2))-dimethyltransferase	Trmt1	-0.102639	0.429865
Microtubule-associated protein RP/EB family member 1	Mapre1	-0.0499687	0.705627
WD repeat-containing protein 26	Wdr26	0.025842	0.806226
Glycerol-3-phosphate acyltransferase 4	Gpat4	-0.180579	0.417662
Vacuolar protein sorting-associated protein 28 homolog	Vps28	0.203067	0.436336
Ribonucleoside-diphosphate reductase subunit M2	Rrm2	-0.100193	0.466848
Beta-hexosaminidase subunit alpha	Hexa	-0.153053	0.678928
GTP-binding protein	Ifi47	0.016264	0.903912
Ubiquitin carboxyl-terminal hydrolase 8	Usp8	0.0462176	0.776147
CAP-Gly domain-containing linker protein 2	Clip2	-0.171843	0.573696
SR-related CTD-associated factor 11	Scaf11	0.178975	0.325515
Ras-related protein Rap-1A	Rap1a	-0.021258	0.906874
Zinc finger CCCH domain-containing protein 18	Zc3h18	0.139531	0.45348
Protein kinase C delta type	Prkcd	0.0773565	0.720284
Serine-protein kinase ATM	Atm	-0.0941047	0.590273
Sec24-related gene family, member D (S. cerevisiae)	Sec24d	-0.57038	0.171278
Syndetin	Vps50	0.0655222	0.744023
RNA N6-adenosine-methyltransferase METTL16	Mettl16	-0.0507057	0.653414
Nuclear pore complex protein Nup50	Nup50	0.00334402	0.982086
Differentially expressed in FDCP 6	Def6	0.179332	0.315227
PC4 and SFRS1-interacting protein	Psip1	0.263023	0.289163
Ankycorbin	Rai14	0.0402618	0.803429
Selenocysteine-specific elongation factor	Eefsec	0.00831837	0.971628
Ceramide transfer protein	Cert1	-0.0169494	0.879545
Intersectin-1	Itsn1	-0.0666805	0.578216
Hemopexin	HPX	NA	NA
ADP-ribosylation factor-binding protein GGA2	Gga2	-0.167951	0.41596
Brefeldin A-inhibited guanine nucleotide-exchange protein 2	Arfgef2	-0.140961	0.516859
Coiled-coil domain-containing protein 6	Ccdc6	0.10912	0.550177
Bridging integrator 2	Bin2	-0.0965208	0.467674
Histone-lysine N-methyltransferase SETD1A	Setd1a	0.154862	0.429865
Ribose-phosphate diphosphokinase;Ribose-phosphate pyrophosphokinase 1	Prps1l3;Prps1	0.13895	0.301478
Polypeptide N-acetylgalactosaminyltransferase 1	Galnt1	-0.0165487	0.882169
H-2 class I histocompatibility antigen, L-D alpha chain	H2-L	-0.127448	0.377537
Protease 1	NA	NA	NA
Heat shock 70 kDa protein 1-like	Hspa1l	-0.288318	0.506075
Thioredoxin-dependent peroxide reductase, mitochondrial	Prdx3	-0.238619	0.343314
Branched-chain-amino-acid aminotransferase, cytosolic	Bcat1	-0.169859	0.41837
60S ribosomal protein L12	Rpl12	0.041542	0.807465
Adenosine kinase	Adk	0.0856619	0.501729
Serine palmitoyltransferase 2	Sptlc2	-0.0563206	0.642275
Heterochromatin protein 1-binding protein 3	Hp1bp3	-0.120825	0.652771
Myosin regulatory light chain 12B	Myl12b	0.106097	0.546979
Glycerol-3-phosphate dehydrogenase 1-like protein	Gpd1l	0.00539254	0.971857
Protein PRRC1	Prrc1	-0.212576	0.394371
Voltage-dependent anion-selective channel protein 3	Vdac3	-0.358016	0.376361
Eukaryotic translation initiation factor 2D	Eif2d	-0.05842	0.802312
Double-strand break repair protein MRE11	Mre11	0.0705226	0.513854
Splicing factor 1	Sf1	-0.0857439	0.627226
40S ribosomal protein S9	Rps9	-0.376996	0.315227
Polycomb protein Suz12	Suz12	0.0759735	0.548052
Mannosyl-oligosaccharide glucosidase	Mogs	-0.134127	0.488729
Polypyrimidine tract-binding protein 3	Ptbp3	-0.108639	0.514129
26S proteasome non-ATPase regulatory subunit 5	Psmd5	-0.376281	0.313532
Methionine aminopeptidase 1	Metap1	-0.0313094	0.763391
WASH complex subunit 5	Washc5	-0.0920717	0.62154
Vacuolar protein sorting-associated protein 52 homolog	Vps52	0.0755762	0.653784
Peptidylprolyl isomerase domain and WD repeat-containing protein 1	Ppwd1	0.0471861	0.683388
Protein arginine N-methyltransferase 5	Prmt5	-0.179658	0.288974
Hydroxymethylglutaryl-CoA synthase, cytoplasmic	Hmgcs1	-0.109318	0.443955
Parafibromin	Cdc73	-0.000643354	0.995435
Long-chain-fatty-acid--CoA ligase 5	Acsl5	-0.15576	0.343314
Amyloid beta A4 precursor protein-binding family B member 1-interacting protein	Apbb1ip	-0.044305	0.749965
ADP-dependent glucokinase	Adpgk	-0.378252	0.224659
ADP-ribosylation factor-like protein 8A	Arl8a	0.107648	0.506815
ATP-dependent DNA/RNA helicase DHX36	Dhx36	0.166567	0.453898
Transcriptional repressor p66-beta	Gatad2b	0.146551	0.367829
MKI67 FHA domain-interacting nucleolar phosphoprotein	Nifk	-0.15333	0.376135
Probable ATP-dependent RNA helicase DDX41	Ddx41	-0.0531561	0.589964
Serine/threonine-protein phosphatase 6 regulatory subunit 3	Ppp6r3	0.136359	0.390107
SWI/SNF-related matrix-associated actin-dependent regulator of chromatin subfamily D member 2	Smarcd2	0.0107547	0.930012
DnaJ homolog subfamily B member 11	Dnajb11	-0.113026	0.473061
NADH dehydrogenase [ubiquinone] 1 alpha subcomplex subunit 10, mitochondrial	Ndufa10	-0.0977715	0.43227
GrpE protein homolog 1, mitochondrial	Grpel1	0.00351805	0.986982
Methylcrotonoyl-CoA carboxylase subunit alpha, mitochondrial	Mccc1	-0.142635	0.385426
Biliverdin reductase A	Blvra	0.0400914	0.691945
PAT complex subunit CCDC47	Ccdc47	-0.0782087	0.621555
Protein PBDC1	Pbdc1	-0.0671991	0.733568
mRNA turnover protein 4 homolog	Mrto4	-0.0728124	0.507073
Cytochrome c1, heme protein, mitochondrial	Cyc1	0.0155355	0.919021
Nitric oxide synthase-interacting protein	Nosip	0.193977	0.301478
Cytochrome b-c1 complex subunit 2, mitochondrial	Uqcrc2	-0.184054	0.315227
cAMP-dependent protein kinase type I-alpha regulatory subunit	Prkar1a	0.079288	0.41837
Electron transfer flavoprotein subunit beta	Etfb	-0.107882	0.446088
DAZ-associated protein 1	Dazap1	-0.0476112	0.706658
Transforming protein RhoA	Rhoa	-0.186169	0.428936
Transmembrane emp24 domain-containing protein 2	Tmed2	-0.0543876	0.703673
Metastasis-associated protein MTA2	Mta2	-0.0855568	0.479937
Proteasome subunit alpha type-1	Psma1	-0.164399	0.394572
Nibrin	Nbn	0.0317936	0.830725
V-type proton ATPase 116 kDa subunit a1	Atp6v0a1	0.0610611	0.74557
Rab GTPase-activating protein 1	Rabgap1	0.00891948	0.955265
RNA helicase	Dhx16	0.000618955	0.995745
A-kinase anchor protein 10, mitochondrial	Akap10	-0.0144696	0.923159
Tropomyosin alpha-3 chain	Tpm3	0.178435	0.505037
V-type proton ATPase subunit d 1	Atp6v0d1	-0.0425877	0.761037
SWI/SNF complex subunit SMARCC2	Smarcc2	0.01775	0.924023
Eukaryotic translation initiation factor 2 subunit 1	Eif2s1	0.181046	0.304507
Probable ATP-dependent RNA helicase DDX10	Ddx10	-0.0545889	0.733568
Transmembrane 9 superfamily member 4	Tm9sf4	-0.0737727	0.58682
Lanosterol synthase	Lss	-0.183301	0.233545
Retinoblastoma-binding protein 5	Rbbp5	0.0450234	0.739607
Phosphoinositide 3-kinase regulatory subunit 4	Pik3r4	0.210822	0.415943
UTP--glucose-1-phosphate uridylyltransferase	Ugp2	-0.350393	0.21355
Torsin-1A-interacting protein 1	Tor1aip1	-0.216404	0.28467
Mannose-1-phosphate guanyltransferase alpha	Gmppa	-0.306494	0.347533
ADP-ribosylation factor GTPase-activating protein 2	Arfgap2	0.0589699	0.705792
MMS19 nucleotide excision repair protein homolog	Mms19	-0.0920918	0.703786
Cysteine and histidine-rich domain-containing protein 1	Chordc1	-0.0922747	0.555945
Outer mitochondrial transmembrane helix translocase	Atad1	0.0919326	0.560397
F-box-like/WD repeat-containing protein TBL1X	Tbl1x	-0.00827738	0.958141
Twinfilin-2	Twf2	-0.00550308	0.974185
Eukaryotic translation initiation factor 3 subunit G	Eif3g	0.0114513	0.92264
Lysine-rich nucleolar protein 1	Knop1	0.00912301	0.957943
Ppfia1 protein	Ppfia1	0.0284487	0.876914
Signal recognition particle subunit SRP72	Srp72	-0.0995484	0.605106
NK13	Serpinb6b	0.0185659	0.899019
Disintegrin and metalloproteinase domain-containing protein 10	Adam10	-0.129068	0.435192
Nucleolysin TIAR	Tial1	-0.219181	0.408389
Protein transport protein Sec23A	Sec23a	-0.143632	0.369828
Zinc finger CCCH-type antiviral protein 1	Zc3hav1	-0.0312145	0.85187
RNA polymerase II subunit A C-terminal domain phosphatase	Ctdp1	0.1122	0.519525
S-adenosylhomocysteine hydrolase-like protein 1	Ahcyl1	-0.0513135	0.623056
Aftiphilin	Aftph	-0.0456446	0.835582
N-acetylglucosamine-6-sulfatase	Gns	0.0483767	0.778068
Pyridoxal kinase	Pdxk	-0.320902	0.390287
IQ motif and SEC7 domain-containing protein 1	Iqsec1	-0.174989	0.421895
Exocyst complex component 1	Exoc1	-0.0999067	0.697552
Thioredoxin domain-containing protein 5	Txndc5	-0.0738041	0.486847
Mitochondrial 2-oxoglutarate/malate carrier protein	Slc25a11	-0.28214	0.411432
General transcription factor IIE subunit 2	Gtf2e2	0.0102856	0.952344
N-terminal kinase-like protein	Scyl1	-0.0476636	0.814656
Synaptosomal-associated protein 29	Snap29	-0.0128342	0.939978
Vesicle-trafficking protein SEC22b	Sec22b	-0.0327953	0.744237
C-terminal-binding protein 1	Ctbp1	0.0440835	0.712291
Dihydrofolate reductase	Dhfr	0.150239	0.314992
Cyclin-dependent kinase 4	Cdk4	-0.00753498	0.976631
Ribosomal RNA processing protein 1 homolog A	Rrp1	-0.0521109	0.717419
WD repeat-containing protein 5	Wdr5	-0.0731407	0.759229
Guanine nucleotide exchange protein SMCR8	Smcr8	-0.0461004	0.807285
Coiled-coil domain-containing protein 93	Ccdc93	-0.0819544	0.471485
THO complex subunit 1	Thoc1	0.00883291	0.929763
Perilipin-3	Plin3	-0.0807815	0.729638
Protein SET	Set	0.130875	0.584975
Epididymis-specific alpha-mannosidase	Man2b2	0.026163	0.859317
Tyrosine-protein phosphatase non-receptor type 2	Ptpn2	0.188733	0.426189
Pre-B-cell leukemia transcription factor-interacting protein 1	Pbxip1	-0.080603	0.515406
E3 ubiquitin-protein ligase HERC2	Herc2	-0.068868	0.75033
Zinc finger protein ubi-d4	Dpf2	0.0875769	0.662325
Sarcoplasmic/endoplasmic reticulum calcium ATPase 3	Atp2a3	0.0164923	0.933129
Protein strawberry notch homolog 1	Sbno1	0.11016	0.3732
Probable E3 ubiquitin-protein ligase HERC4	Herc4	-0.0526063	0.733184
Cell division cycle protein 23 homolog	Cdc23	-0.0584338	0.679628
Zinc finger protein 622	Znf622	0.0857663	0.433937
Nuclear factor NF-kappa-B p100 subunit	Nfkb2	0.138431	0.297992
E3 ubiquitin-protein ligase ARIH1	Arih1	-0.0424281	0.8147
Dedicator of cytokinesis protein 11	Dock11	0.00527401	0.971628
Protein Wiz	Wiz	-0.0360062	0.807465
Isocitrate dehydrogenase [NAD] subunit gamma 1, mitochondrial	Idh3g	-0.0261947	0.85187
Lysine-specific demethylase 3B	Kdm3b	0.192658	0.453957
WD repeat-containing protein 43	Wdr43	-0.149736	0.419079
Centrosomal protein of 55 kDa	Cep55	0.0099008	0.948612
Tyrosine--tRNA ligase, mitochondrial	Yars2	-0.133195	0.396658
Osteopontin	Spp1	-0.42107	0.24663
DNA-(apurinic or apyrimidinic site) endonuclease	Apex1	-0.0775919	0.596206
Nitric oxide synthase, inducible	Nos2	-0.302234	0.573696
Glutathione synthetase	Gss	0.0798308	0.677513
Disintegrin and metalloproteinase domain-containing protein 8	Adam8	-0.388344	0.223517
Protein phosphatase 1 regulatory subunit 21	Ppp1r21	0.0919517	0.531124
5'-AMP-activated protein kinase catalytic subunit alpha-1	Prkaa1	-0.13749	0.400847
Tumor susceptibility gene 101 protein	Tsg101	-0.00370754	0.979196
Glomulin	Glmn	-0.0922711	0.481917
Mixed lineage kinase domain-like protein	Mlkl	-0.132576	0.419287
Neuropilin-2	Nrp2	-0.0610753	0.673748
Intercellular adhesion molecule 1	Icam1	0.146109	0.535958
Chromobox protein homolog 3	Cbx3	0.0585803	0.706692
Prolyl 3-hydroxylase OGFOD1	Ogfod1	-0.102076	0.627226
Chromobox protein homolog 5	Cbx5	0.216005	0.390549
Phosphoribosyl pyrophosphate synthase-associated protein 2	Prpsap2	-0.141582	0.717419
Cyclin-dependent kinase 1	Cdk1	0.260798	0.315227
NEDD8 ultimate buster 1	Nub1	-0.119229	0.419287
CD180 antigen	Cd180	-0.282924	0.315227
Parkinson disease protein 7 homolog	Park7	0.0291509	0.874286
Endoplasmic reticulum-Golgi intermediate compartment protein 1	Ergic1	-0.268043	0.286059
AMP deaminase 3	Ampd3	-0.263788	0.255399
Integrin-linked protein kinase	Ilk	-0.278795	0.435283
Medium-chain specific acyl-CoA dehydrogenase, mitochondrial	Acadm	0.0248193	0.814696
Rho GTPase-activating protein 30	Arhgap30	-0.0386915	0.778621
Pre-mRNA-splicing regulator WTAP	Wtap	0.0885356	0.588282
26S proteasome non-ATPase regulatory subunit 10	Psmd10	0.11049	0.653784
60S acidic ribosomal protein P0	Rplp0	-0.100167	0.502059
Hepatoma-derived growth factor	Hdgf	0.168179	0.496614
Luc7-like protein 3	Luc7l3	-0.0239394	0.870751
Exopolyphosphatase PRUNE1	Prune1	0.0746518	0.81528
Regulator of chromosome condensation	Rcc1	-0.0527197	0.615366
DNA repair protein XRCC4	Xrcc4	-0.206008	0.323515
PHD finger protein 11	Phf11	-0.366622	0.289163
2',5'-phosphodiesterase 12	Pde12	-0.0232426	0.925631
Unconventional myosin-Ig	Myo1g	-0.28254	0.268218
TGF-beta-activated kinase 1 and MAP3K7-binding protein 1	Tab1	-0.0527902	0.663595
Basic leucine zipper and W2 domain-containing protein 2	Bzw2	0.0443737	0.722288
High mobility group protein B2	Hmgb2	0.0666004	0.860434
Perilipin-2	Plin2	-0.189747	0.636822
Proteasome activator complex subunit 2	Psme2	-0.0653442	0.744571
Nucleoside diphosphate kinase B	Nme2	-0.0876916	0.562412
WD repeat-containing protein 48	Wdr48	0.184249	0.31785
HCLS1-associated protein X-1	Hax1	-0.0989778	0.610155
Galectin-1	Lgals1	-0.202041	0.289163
Carnitine O-palmitoyltransferase 2, mitochondrial	Cpt2	-0.0530589	0.733874
Holocytochrome c-type synthase	Hccs	-0.0573865	0.715139
Catechol O-methyltransferase	Comt	-0.0122336	0.926451
Eukaryotic translation initiation factor 4E	Eif4e	0.0200457	0.919191
Large proline-rich protein BAG6	Bag6	-0.134275	0.534608
Lysosomal alpha-glucosidase	Gaa	-0.276962	0.429865
RNA-binding protein Raly	Raly	0.0365708	0.835582
Sorting nexin-6	Snx6	0.15911	0.51644
2'-5'-oligoadenylate synthase-like protein 1	Oasl1	-0.637704	0.300537
Neutral amino acid transporter B(0)	Slc1a5	-0.0659365	0.666621
Delta(14)-sterol reductase LBR	Lbr	-0.116867	0.453251
Aspartyl aminopeptidase	Dnpep	-0.0168909	0.913424
GTP-binding nuclear protein Ran	Ran	0.0339309	0.87375
Apol9a protein	Apol9a	-0.138597	0.602663
Basic leucine zipper and W2 domain-containing protein 1	Bzw1	-0.0135209	0.925631
Thioredoxin reductase 1, cytoplasmic	Txnrd1	-0.13649	0.315227
Bromodomain PHD finger transcription factor	Bptf	0.202123	0.28467
Caspase recruitment domain-containing protein 9	Card9	0.179812	0.391041
Coatomer subunit epsilon	Cope	0.0838899	0.462368
Hemoglobin subunit alpha	HBA	NA	NA
Calmodulin-1;Calmodulin-2;Calmodulin-3	Calm1;Calm2;Calm3	0.149725	0.531124
Monocyte differentiation antigen CD14	Cd14	-0.0108502	0.958141
Malate dehydrogenase, cytoplasmic	Mdh1	0.157538	0.292429
Methylmalonyl-CoA mutase, mitochondrial	Mmut	0.102449	0.411337
Ribosomal protein S6 kinase alpha-3	Rps6ka3	0.102065	0.5177
Guanine nucleotide-binding protein subunit alpha-13	Gna13	-0.06552	0.559077
Huntingtin	Htt	-0.197327	0.479937
Dolichyl-diphosphooligosaccharide--protein glycosyltransferase subunit STT3A	Stt3a	-0.053768	0.596357
Quinone oxidoreductase	Cryz	0.0413241	0.739607
ADP/ATP translocase 1	Slc25a4	-0.133348	0.666785
Inosine-5'-monophosphate dehydrogenase 1	Impdh1	-0.0417558	0.712063
Ras-related protein Rab-1A	Rab1A	0.099265	0.622756
Serine/threonine-protein kinase N1	Pkn1	-0.120324	0.517334
G patch domain-containing protein 4	Gpatch4	-0.0825642	0.721959
General transcription factor IIF subunit 1	Gtf2f1	0.247795	0.38449
Endoplasmic reticulum metallopeptidase 1	Ermp1	-0.223822	0.306973
Probable ATP-dependent RNA helicase DDX49	Ddx49	0.14362	0.308042
Receptor-interacting serine/threonine-protein kinase 1	Ripk1	0.13813	0.39958
Iron-sulfur clusters transporter ABCB7, mitochondrial	Abcb7	-0.251005	0.336051
Jupiter microtubule associated homolog 2	Jpt2	0.100486	0.524926
Ran-binding protein 10	Ranbp10	0.206082	0.336051
MICOS complex subunit Mic27	Apool	0.0757559	0.605066
Echinoderm microtubule-associated protein-like 2	Eml2	-0.0338271	0.874682
Protein FAM98B	Fam98b	0.141293	0.449524
E3 ubiquitin-protein ligase TRIM56	Trim56	-0.0232769	0.877697
Autophagy-related protein 2 homolog B	Atg2b	0.192553	0.432301
Protein THEM6	Them6	-0.300864	0.279524
Sec24-related gene family, member B (S. cerevisiae)	Sec24b	0.124966	0.511812
Leucine-rich repeat and WD repeat-containing protein 1	LRWD1	0.126853	0.339973
Lysophosphatidylcholine acyltransferase 2	Lpcat2	0.0453601	0.853771
NHL repeat-containing protein 2	Nhlrc2	0.0361718	0.877625
Septin-11	Septin11	-0.252713	0.380056
Probable E3 ubiquitin-protein ligase IRF2BPL	Irf2bpl	-0.0614639	0.610764
3-hydroxyisobutyryl-CoA hydrolase, mitochondrial	Hibch	-0.0891116	0.456345
U3 small nucleolar RNA-associated protein 4 homolog	Utp4	-0.263363	0.410782
Mini-chromosome maintenance complex-binding protein	Mcmbp	0.185016	0.383518
WD repeat-containing protein 74	Wdr74	-0.0517472	0.669863
Heterogeneous nuclear ribonucleoprotein U-like protein 1	Hnrnpul1	0.0684978	0.588305
Bifunctional UDP-N-acetylglucosamine 2-epimerase/N-acetylmannosamine kinase	Gne	-0.0274099	0.89349
U3 small nucleolar RNA-interacting protein 2	Rrp9	-0.206393	0.268244
Gbp6 protein	Gbp7	-0.0233439	0.9526
TAR DNA-binding protein 43	Tardbp	-0.126755	0.689187
Flavin reductase (NADPH)	Blvrb	-0.350925	0.209985
Clathrin interactor 1	Clint1	-0.0311721	0.830344
Ankyrin repeat domain-containing protein 17	Ankrd17	0.0670904	0.578216
Actin-related protein 2/3 complex subunit 5	Arpc5	-0.440156	0.304507
Ragulator complex protein LAMTOR1	Lamtor1	0.139172	0.486704
GTP-binding protein SAR1b	Sar1b	-0.105233	0.53589
RNA-binding protein 7	Rbm7	-0.129313	0.496614
Vacuolar protein sorting-associated protein VTA1 homolog	Vta1	-0.0211277	0.886849
OCIA domain-containing protein 1	Ociad1	-0.258188	0.329981
Tumor protein D54	Tpd52l2	-0.0819461	0.552477
Replication factor C subunit 5	Rfc5	-0.0409495	0.808524
Phosphoribosyl pyrophosphate synthase-associated protein 1	Prpsap1	0.115483	0.462368
Vesicular integral-membrane protein VIP36	Lman2	-0.0476216	0.64369
Transmembrane protein 43	Tmem43	-0.24815	0.375709
ATP synthase subunit d, mitochondrial	Atp5pd	-0.0105636	0.939578
Serine hydrolase-like protein	Serhl	-0.134865	0.534608
Striatin-3	Strn3	-0.0475488	0.703786
Mortality factor 4-like protein 2	Morf4l2	0.316092	0.250486
Serine/threonine-protein kinase TBK1	Tbk1	-0.0107022	0.955743
Interferon-activated gene 207	Ifi207	-0.27027	0.323515
ADP-ribosylation factor-interacting protein 1	Arfip1	-0.220806	0.384267
GTP-binding protein 1	Gtpbp1	0.146609	0.35543
Hemoglobin fetal subunit beta	NA	NA	NA
Nucleoside diphosphate kinase A	Nme1	-0.116593	0.724738
Lysosomal protective protein	Ctsa	0.08071	0.77651
Transcription initiation factor IIB	Gtf2b	0.160075	0.312376
Proteasome subunit beta type-7	Psmb7	-0.135301	0.324501
Epidermal growth factor receptor kinase substrate 8	Eps8	0.0415925	0.730369
Src kinase-associated phosphoprotein 2	Skap2	-0.0805894	0.618296
Neurabin-2	Ppp1r9b	0.0805165	0.607196
SR-related and CTD-associated factor 4	Scaf4	0.0453146	0.74557
Pogo transposable element with ZNF domain	Pogz	0.151435	0.323515
Tubulin-specific chaperone E	Tbce	-0.177143	0.289163
Collectin-12	Colec12	-0.29018	0.171278
Inorganic pyrophosphatase 2, mitochondrial	Ppa2	-0.0155465	0.899019
Cleavage stimulation factor subunit 1	Cstf1	-0.0952934	0.600688
Translation initiation factor eIF-2B subunit alpha	Eif2b1	-0.0734127	0.707727
Periodic tryptophan protein 1 homolog	Pwp1	0.0468996	0.755341
6-phosphogluconolactonase	Pgls	0.0894747	0.43227
39S ribosomal protein L19, mitochondrial	Mrpl19	-0.0718736	0.504597
LIM domain and actin-binding protein 1	Lima1	-0.17952	0.289163
Pleckstrin homology domain-containing family A member 2	Plekha2	0.138618	0.470059
Selenocysteine lyase	Scly	0.218597	0.258382
Bifunctional polynucleotide phosphatase/kinase	Pnkp	0.106133	0.389446
Sterol-4-alpha-carboxylate 3-dehydrogenase, decarboxylating	Nsdhl	-0.114877	0.532659
Proteasome subunit beta type-2	Psmb2	0.0054767	0.958767
Succinate--CoA ligase [ADP/GDP-forming] subunit alpha, mitochondrial	Suclg1	-0.258208	0.506075
Nucleolar complex protein 2 homolog	Noc2l	0.0447762	0.740649
Neurochondrin	Ncdn	0.050184	0.709386
Dedicator of cytokinesis protein 5	Dock5	-0.189537	0.35543
Importin subunit alpha-4	Kpna3	-0.00773397	0.947286
Beta-galactosidase	Glb1	0.0210684	0.870606
Nuclear protein localization protein 4 homolog	Nploc4	-0.0523997	0.692058
Rho GTPase-activating protein 17	Arhgap17	0.0722522	0.487187
NADPH:adrenodoxin oxidoreductase, mitochondrial	Fdxr	-0.0804915	0.561663
La-related protein 4B	Larp4b	0.0335473	0.843237
U2 snRNP-associated SURP motif-containing protein	U2surp	-0.091567	0.468441
Periodic tryptophan protein 2 homolog	Pwp2	-0.536478	0.209985
Splicing factor 45	Rbm17	-0.0115022	0.94515
Transcription factor 25	Tcf25	-0.0202174	0.909793
Rab GTPase-binding effector protein 2	Rabep2	0.201231	0.289163
BAG family molecular chaperone regulator 2	Bag2	-0.0986269	0.443273
Kinesin-like protein KIF2C	Kif2c	-0.0993783	0.592771
Cleavage stimulation factor subunit 3	Cstf3	0.0984223	0.494182
CDK5 regulatory subunit-associated protein 3	Cdk5rap3	-0.0013766	0.991235
Lysophosphatidylserine lipase ABHD12	Abhd12	-0.162062	0.474408
ELKS/Rab6-interacting/CAST family member 1	Erc1	-0.0392832	0.774041
Epoxide hydrolase 1	Ephx1	-0.0508784	0.781066
Ribosome biogenesis protein BRX1 homolog	Brix1	-0.181101	0.506142
Mediator of RNA polymerase II transcription subunit 12	Med12	-0.0667685	0.67371
Ubiquitin-like protein 4A	Ubl4a	0.103164	0.421962
RAC-alpha serine/threonine-protein kinase	Akt1	-0.0342977	0.907037
Antigen peptide transporter 2	Tap2	-0.248311	0.290527
Green fluorescent protein	GFP	NA	NA
60S ribosomal protein L13	Rpl13	-0.188642	0.39958
Protein 4.1	Epb41	0.0412351	0.766294
Ubiquitin carboxyl-terminal hydrolase 10	Usp10	0.0501168	0.654886
Lysine-specific demethylase 2A	Kdm2a	-0.129802	0.453193
40S ribosomal protein S14	Rps14	0.0683233	0.627226
Unconventional myosin-If	Myo1f	-0.0749267	0.624076
Serine/threonine-protein phosphatase 2A 56 kDa regulatory subunit gamma isoform	Ppp2r5c	-0.102159	0.650795
Fibronectin type III domain-containing protein 3B	Fndc3b	-0.421604	0.224659
La-related protein 4	Larp4	-0.196295	0.289163
Death-inducer obliterator 1	Dido1	0.0694545	0.718142
Bcl-2-associated transcription factor 1	Bclaf1	0.0969785	0.606216
Metastasis-associated protein MTA1	Mta1	-0.178693	0.525701
Actin-histidine N-methyltransferase	Setd3	0.146343	0.429865
Transmembrane emp24 domain-containing protein 9	Tmed9	-0.126606	0.474227
COP9 signalosome complex subunit 1	Gps1	0.00118621	0.992126
Ubiquilin-4	Ubqln4	-0.0491808	0.837486
mRNA cap guanine-N7 methyltransferase	Rnmt	0.152018	0.289163
Something about silencing protein 10	Utp3	0.0966094	0.594356
Disintegrin and metalloproteinase domain-containing protein 17	Adam17	-0.08428	0.54853
Double-stranded RNA-binding protein Staufen homolog 1	Stau1	0.169795	0.350599
SPI6	Serpinb9	-0.340188	0.193227
Dual specificity mitogen-activated protein kinase kinase 3	Map2k3	-0.21373	0.382308
SRSF protein kinase 1	Srpk1	0.130135	0.535591
Histone H1.3	H1-3	-0.325196	0.421962
Immunoglobulin-binding protein 1	Igbp1	0.107277	0.410782
Protein mono-ADP-ribosyltransferase PARP12	Parp12	-0.328042	0.287699
7SK snRNA methylphosphate capping enzyme	Mepce	0.175727	0.507152
Coronin-7	Coro7	-0.0652368	0.821503
Thioredoxin-related transmembrane protein 2	Tmx2	-0.0591543	0.58682
Pentatricopeptide repeat domain-containing protein 3, mitochondrial	Ptcd3	-0.0476931	0.687438
Terminal uridylyltransferase 7	Tut7	-0.0110103	0.941454
Kinesin-like protein KIF15	Kif15	0.227161	0.322628
Cytoplasmic dynein 1 light intermediate chain 2	Dync1li2	0.0649211	0.555945
Integrator complex subunit 3	Ints3	-0.16965	0.383253
Lysophosphatidic acid phosphatase type 6	Acp6	-0.19253	0.650469
GDH/6PGL endoplasmic bifunctional protein	H6pd	-0.322091	0.289163
Kelch domain-containing protein 4	Klhdc4	-0.0292983	0.816703
DCN1-like protein 5	Dcun1d5	0.234021	0.228786
Zinc finger CCHC domain-containing protein 8	Zcchc8	-0.0369045	0.758777
Mitochondrial import receptor subunit TOM40 homolog	Tomm40	-0.0542313	0.717419
Prolactin regulatory element-binding protein	Preb	-0.435114	0.315227
2-amino-3-ketobutyrate coenzyme A ligase, mitochondrial	Gcat	-0.241405	0.289163
Serine/threonine-protein kinase A-Raf	Araf	0.0160532	0.934085
Signal recognition particle receptor subunit beta	Srprb	-0.0573457	0.602792
Gem (Nuclear organelle) associated protein 4	Gemin4	-0.301736	0.43227
Brain-specific angiogenesis inhibitor 1-associated protein 2	Baiap2	-0.161676	0.435546
60S ribosomal export protein NMD3	Nmd3	0.0585765	0.709386
CCR4-NOT transcription complex subunit 9	Cnot9	-0.135655	0.576121
Peroxiredoxin-4	Prdx4	-0.150692	0.347896
Phosphatidylinositol 5-phosphate 4-kinase type-2 alpha	Pip4k2a	0.0454816	0.667725
Interferon-related developmental regulator 1	Ifrd1	0.404787	0.157237
E3 ubiquitin-protein ligase CBL	Cbl	0.0681247	0.588942
YTH domain-containing family protein 1	Ythdf1	0.0416899	0.818443
Peroxiredoxin-2	Prdx2	0.114932	0.385426
Rab3 GTPase-activating protein catalytic subunit	Rab3gap1	0.0256376	0.858632
Electron transfer flavoprotein-ubiquinone oxidoreductase, mitochondrial	Etfdh	-0.0327978	0.733467
Trifunctional enzyme subunit beta, mitochondrial	Hadhb	0.0341491	0.811908
Sodium/myo-inositol cotransporter	Slc5a3	-0.258861	0.390549
BAG family molecular chaperone regulator 3	Bag3	0.0759374	0.695252
PHD finger protein 3	Phf3	0.178803	0.506815
IQ motif-containing GTPase-activating protein 3	Iqgap3	0.370646	0.209985
Cytoplasmic aconitate hydratase	Aco1	0.0336069	0.810632
40S ribosomal protein S5	Rps5	-0.297027	0.61223
Apoptosis regulator BAX	Bax	0.239389	0.323515
Ubiquitin-protein ligase E3C	Ube3c	-0.151568	0.409064
Vesicle-associated membrane protein-associated protein A	Vapa	-0.0842293	0.643539
N-alpha-acetyltransferase 50	Naa50	-0.113112	0.510869
AFG3-like protein 1	Afg3l1	-0.0557514	0.817964
Receptor-type tyrosine-protein phosphatase alpha	Ptpra	-0.193927	0.279524
Histone-lysine N-methyltransferase EZH2	Ezh2	-0.0561833	0.713034
Sorcin	Sri	-0.0270006	0.918105
Protein Hook homolog 3	Hook3	0.148832	0.392975
Testis-expressed protein 10	Tex10	-0.237588	0.468559
Replication protein A 32 kDa subunit	Rpa2	0.0252559	0.866918
Proteasome subunit beta type-5	Psmb5	-0.0763684	0.768632
Thyroid adenoma-associated protein homolog	Thada	-0.272507	0.312376
SLAIN motif-containing protein 2	Slain2	-0.189759	0.336051
Probable ATP-dependent RNA helicase DHX58	Dhx58	-0.275275	0.289163
Chromodomain-helicase-DNA-binding protein 1-like	Chd1l	0.146604	0.406494
39S ribosomal protein L46, mitochondrial	Mrpl46	-0.1313	0.419287
Osteoclast-stimulating factor 1	Ostf1	-0.149214	0.502881
ATPase GET3	Get3	-0.302251	0.375709
Alcohol dehydrogenase class-3	Adh5	-0.0714124	0.592771
Histone acetyltransferase KAT7	Kat7	0.161822	0.421962
U1 small nuclear ribonucleoprotein 70 kDa	Snrnp70	0.114127	0.606997
Phosphatidylinositol 3-kinase catalytic subunit type 3	Pik3c3	0.137024	0.5177
Cell division cycle and apoptosis regulator protein 1	Ccar1	-0.0625991	0.615562
E3 ubiquitin-protein ligase RNF114	Rnf114	0.00926806	0.963454
HEAT repeat-containing protein 3	Heatr3	-0.215738	0.524662
Protein unc-45 homolog A	Unc45a	-0.0649776	0.73071
p21-activated protein kinase-interacting protein 1	Pak1ip1	-0.0634543	0.82145
Interferon-activable protein 203	Ifi203	0.0623846	0.853912
Choline-phosphate cytidylyltransferase A	Pcyt1a	0.39354	0.209985
Monoacylglycerol lipase ABHD6	Abhd6	-0.0147935	0.923159
Proteasome subunit alpha type-6	Psma6	-0.100567	0.548052
Peptidyl-prolyl cis-trans isomerase G	Ppig	-0.188343	0.228786
Histone acetyltransferase p300	Ep300	-0.0635685	0.671358
Brefeldin A-inhibited guanine nucleotide-exchange protein 1	Arfgef1	0.0645472	0.769806
Serine/arginine-rich splicing factor 5	Srsf5	-0.040538	0.769506
Peptidyl-prolyl cis-trans isomerase FKBP8	Fkbp8	-0.185156	0.28467
SWI/SNF-related matrix-associated actin-dependent regulator of chromatin subfamily E member 1	Smarce1	0.105913	0.564256
Docking protein 2	Dok2	-0.0592463	0.555268
DNA (cytosine-5)-methyltransferase 3A	Dnmt3a	0.0577755	0.769924
IgE-binding protein	Iap	0.03631	0.700345
Thioredoxin	Txn	-0.271017	0.409297
Bifunctional methylenetetrahydrofolate dehydrogenase/cyclohydrolase, mitochondrial	Mthfd2	-0.030653	0.893989
Cytochrome c oxidase subunit 5B, mitochondrial	Cox5b	-0.325661	0.28467
Ras-related protein Rab-6A	Rab6a	-0.0722533	0.608839
Vacuolar protein sorting-associated protein 26A	Vps26a	0.218357	0.289163
Long-chain-fatty-acid--CoA ligase 1	Acsl1	-0.0407375	0.694986
Glutathione reductase, mitochondrial	Gsr	-0.190152	0.564055
Arylsulfatase B	Arsb	-0.155081	0.384181
U2 small nuclear ribonucleoprotein A'	Snrpa1	-0.151851	0.535591
40S ribosomal protein S8	Rps8	0.0365537	0.812789
ADP-ribosylation factor 6	Arf6	-0.204448	0.43928
Wiskott-Aldrich syndrome protein homolog	Was	0.137243	0.384267
Caspase-3	Casp3	0.0502968	0.793425
Spermine synthase	Sms	-0.212442	0.269529
60S acidic ribosomal protein P2	Rplp2	0.0408025	0.837486
Peroxiredoxin-5, mitochondrial	Prdx5	-0.382795	0.171472
Transcriptional repressor protein YY1	Yy1	0.143663	0.538381
Polynucleotide 5'-hydroxyl-kinase NOL9	Nol9	-0.0954483	0.51368
Threonine--tRNA ligase, mitochondrial	Tars2	-0.159303	0.443273
ESF1 homolog	Esf1	-0.00561816	0.972754
G-patch domain and KOW motifs-containing protein	Gpkow	-0.078273	0.545402
Casein kinase II subunit alpha	Csnk2a1	0.0264899	0.818443
KH domain-containing, RNA-binding, signal transduction-associated protein 1	Khdrbs1	-0.0265073	0.864862
Importin subunit alpha-5	Kpna1	-0.0835491	0.486633
Prosaposin	Psap	-0.190038	0.588942
Tumor protein D52	Tpd52	-0.169665	0.478262
Serine/arginine-rich splicing factor 1	Srsf1	-0.00134308	0.995435
Zinc finger CCCH domain-containing protein 4	Zc3h4	0.0720375	0.666385
Formin-binding protein 4	Fnbp4	-0.0702708	0.61183
Inositol hexakisphosphate and diphosphoinositol-pentakisphosphate kinase 2	Ppip5k2	-0.0137939	0.929707
Malectin	Mlec	-0.188988	0.339973
Serine/threonine-protein phosphatase 1 regulatory subunit 10	Ppp1r10	-0.0826925	0.673748
Glutamate-rich WD repeat-containing protein 1	Grwd1	-0.0966201	0.44209
Volume-regulated anion channel subunit LRRC8D	Lrrc8d	-0.141281	0.443261
CDKN2A-interacting protein	Cdkn2aip	0.070789	0.53744
Small glutamine-rich tetratricopeptide repeat-containing protein alpha	Sgta	-0.0542929	0.662932
28S ribosomal protein S27, mitochondrial	Mrps27	-0.0318446	0.895383
60S ribosomal protein L24	Rpl24	-0.339509	0.419287
ADP-ribose pyrophosphatase, mitochondrial	Nudt9	-0.22058	0.268244
YTH domain-containing family protein 3	Ythdf3	0.0964776	0.502881
Vacuolar protein sorting-associated protein 26B	Vps26b	0.00260914	0.987387
Protein HGH1 homolog	Hgh1	-0.174789	0.445641
Negative elongation factor B	Nelfb	0.140632	0.391041
Abl interactor 1	Abi1	-0.0906544	0.516859
DIS3-like exonuclease 2	Dis3l2	-0.124225	0.421564
Serine/threonine-protein phosphatase 4 regulatory subunit 1	Ppp4r1	-0.084195	0.513854
Nucleoporin NDC1	Ndc1	-0.156792	0.397934
Ubiquitin-like modifier-activating enzyme 5	Uba5	-0.213596	0.326292
Nucleolar complex protein 3 homolog	Noc3l	-0.393945	0.328017
Phosphatidylinositol 5-phosphate 4-kinase type-2 gamma	Pip4k2c	-0.103681	0.561888
mRNA-decapping enzyme 1A	Dcp1a	-0.114881	0.415165
eEF1A lysine and N-terminal methyltransferase	EEF1AKNMT	-0.230196	0.322628
Retinoid-inducible serine carboxypeptidase	Scpep1	-0.0580805	0.699654
Exosome complex component RRP41	Exosc4	-0.264417	0.533336
Protein arginine N-methyltransferase 3	Prmt3	-0.174236	0.385426
cGMP-dependent 3',5'-cyclic phosphodiesterase	Pde2a	-0.204866	0.289163
WW domain-binding protein 11	Wbp11	-0.0260504	0.810054
Replication factor C subunit 4	Rfc4	0.161541	0.410782
1,2-dihydroxy-3-keto-5-methylthiopentene dioxygenase	Adi1	-0.0400015	0.818443
Ras-related GTP-binding protein C	Rragc	-0.0710713	0.698409
Hydroxyacylglutathione hydrolase, mitochondrial	Hagh	-0.261041	0.28467
RNA-binding protein 10	Rbm10	0.0029382	0.981594
Hsc70-interacting protein	St13	0.0672491	0.669174
Chloride channel CLIC-like protein 1	Clcc1	0.00785102	0.961498
Phosphoserine phosphatase	Psph	-0.0968154	0.574128
ATP synthase F(0) complex subunit B1, mitochondrial	Atp5pb	0.00544503	0.969804
Transmembrane protein 33	Tmem33	-0.426528	0.209985
Mitochondrial potassium channel ATP-binding subunit	Abcb8	0.110673	0.425801
Single-stranded DNA-binding protein, mitochondrial	Ssbp1	-0.112637	0.384053
ATP-dependent (S)-NAD(P)H-hydrate dehydratase	Naxd	-0.129833	0.408389
Eukaryotic translation elongation factor 1 epsilon-1	Eef1e1	-0.303816	0.289163
Protein SAAL1	Saal1	0.036172	0.830714
RNA polymerase II-associated protein 3	Rpap3	0.102312	0.458482
RNA 3'-terminal phosphate cyclase	RtcA	0.107996	0.411337
Mitochondrial import inner membrane translocase subunit TIM50	Timm50	-0.171673	0.459509
Proline-, glutamic acid- and leucine-rich protein 1	Pelp1	-0.0470805	0.740284
Short/branched chain specific acyl-CoA dehydrogenase, mitochondrial	Acadsb	-0.214694	0.315227
Protein phosphatase inhibitor 2	Ppp1r2	0.101196	0.779465
LRP chaperone MESD	Mesd	-0.0952624	0.548052
NADH dehydrogenase [ubiquinone] 1 alpha subcomplex subunit 13	Ndufa13	-0.188745	0.480281
Stromal cell-derived factor 2-like protein 1	Sdf2l1	-0.312598	0.301478
Isovaleryl-CoA dehydrogenase, mitochondrial	Ivd	0.0227606	0.860578
ADP-sugar pyrophosphatase	Nudt5	0.0265329	0.830136
CD2-associated protein	Cd2ap	-0.209815	0.33944
Protein numb homolog	Numb	-0.158626	0.323515
Prostaglandin E synthase 3	Ptges3	-0.435734	0.386943
tRNA pseudouridine synthase A	Pus1	-0.126596	0.591798
Eukaryotic translation initiation factor 4H	Eif4h	-0.0033462	0.983443
Cathepsin Z	Ctsz	0.0419009	0.733467
Nuclear factor of activated T-cells 5	Nfat5	-0.0514887	0.643567
TFG protein	Tfg	-0.0903579	0.442851
Aminoacyl tRNA synthase complex-interacting multifunctional protein 1	Aimp1	-0.0489476	0.652771
5'-3' exoribonuclease 1	Xrn1	-0.326663	0.396409
Caspase-7	Casp7	0.0651231	0.726561
GA-binding protein alpha chain	Gabpa	0.0650748	0.497751
Core-binding factor subunit beta	Cbfb	-0.0936302	0.506815
Protein SMG7	Smg7	0.0855235	0.510455
Immunity-related GTPase family M protein 1	Irgm1	-0.660055	0.171472
Probable aminopeptidase NPEPL1	Npepl1	0.068899	0.570056
Ankyrin repeat and LEM domain-containing protein 2	Ankle2	-0.0727244	0.567009
Serine/threonine-protein kinase SIK3	Sik3	-0.10768	0.454946
Acetyl-Coenzyme A acetyltransferase 3;Acetyl-CoA acetyltransferase, cytosolic	Acat3;Acat2	-0.0543674	0.718235
Ras-related GTP-binding protein A	Rraga	0.0922208	0.548052
Nucleolar protein 11	Nol11	0.0123862	0.93618
Dipeptidyl peptidase 9	Dpp9	-0.250083	0.451326
ATP-binding cassette sub-family F member 3	Abcf3	-0.0982419	0.540415
Enhancer of mRNA-decapping protein 3	Edc3	-0.13059	0.617612
Protein FAM3C	Fam3c	-0.114571	0.410695
Suppressor of SWI4 1 homolog	Ppan	-0.0972497	0.569064
Dynactin subunit 2	Dctn2	0.10067	0.462368
S-methyl-5'-thioadenosine phosphorylase	Mtap	-0.105075	0.452497
Methylthioribose-1-phosphate isomerase	Mri1	-0.0798281	0.591752
Magnesium transporter protein 1	Magt1	-0.315136	0.315227
Acyl carrier protein, mitochondrial	Ndufab1	-0.139225	0.510025
Minor histocompatibility antigen H13	Hm13	-0.00580715	0.969432
m7GpppX diphosphatase	Dcps	-0.223998	0.385426
NADH-cytochrome b5 reductase 1	Cyb5r1	-0.267878	0.339973
Protein-associating with the carboxyl-terminal domain of ezrin	Scyl3	0.0100574	0.952387
Eukaryotic translation initiation factor 3 subunit K	Eif3k	0.0440527	0.862657
Focadhesin	Focad	-0.394355	0.323515
Queuosine salvage protein	2210016F16Rik	-0.0838891	0.703786
Urokinase-type plasminogen activator	Plau	-0.427154	0.169371
Lysosome-associated membrane glycoprotein 1	Lamp1	0.23187	0.283756
GTP-binding protein SAR1a	Sar1a	-0.183079	0.399657
Flap endonuclease 1	Fen1	0.0573021	0.66673
Striatin-4	Strn4	-0.00418397	0.975955
Dynein light chain roadblock-type 1	Dynlrb1	-0.178442	0.467343
Hippocalcin-like protein 1	Hpcal1	-0.204895	0.553085
Cas scaffolding protein family member 4	Cass4	-0.127306	0.63733
Pachytene checkpoint protein 2 homolog	Trip13	-0.0197084	0.885355
Large subunit GTPase 1 homolog	Lsg1	-0.110101	0.556904
Pre-mRNA-splicing factor 38A	Prpf38a	0.071318	0.578216
45 kDa calcium-binding protein	Sdf4	-0.0936332	0.567742
Syntaxin-binding protein 2	Stxbp2	0.0888719	0.665746
CCR4-NOT transcription complex subunit 10	Cnot10	0.0756436	0.717703
Nuclear cap-binding protein subunit 3	Ncbp3	-0.0418903	0.736531
Tetratricopeptide repeat protein 27	Ttc27	-0.157057	0.449524
Interferon-inducible protein AIM2	Aim2	0.0951389	0.72262
Acyl-CoA (8-3)-desaturase	Fads1	-0.0785108	0.783789
BolA-like protein 1	Bola1	-0.0109032	0.934056
Origin recognition complex subunit 3	Orc3	-0.0363702	0.765265
Actin-related protein 2/3 complex subunit 3	Arpc3	-0.263613	0.5177
Acyl-coenzyme A thioesterase 2, mitochondrial	Acot2	-0.0488488	0.742347
N-acetyl-D-glucosamine kinase	Nagk	0.0272066	0.924264
Inner nuclear membrane protein Man1	Lemd3	-0.217388	0.353569
60S ribosomal protein L9	Rpl9-ps6;Rpl9	-0.0469748	0.846978
Uncharacterized protein	NA	NA	NA
Barrier-to-autointegration factor	Banf1	-0.142227	0.593254
Phosphatidylinositol 3-kinase regulatory subunit alpha	Pik3r1	0.0638005	0.759229
40S ribosomal protein S15a	Rps15a	-0.205692	0.608839
Beta-1,4 N-acetylgalactosaminyltransferase 1	B4galnt1	-0.149183	0.346721
Patatin-like phospholipase domain-containing protein 6	Pnpla6	-0.487263	0.250061
Sorting nexin-27	Snx27	-0.0851972	0.572853
Synergin gamma	Synrg	0.177171	0.541671
Protein LTV1 homolog	Ltv1	0.0105556	0.923159
Bromodomain-containing protein 2	Brd2	0.0312072	0.849232
TIP41-like protein	Tiprl	-0.148524	0.374977
Anaphase-promoting complex subunit 5	Anapc5	-0.201745	0.404949
Synaptojanin-1	Synj1	0.0451741	0.756213
Beta-arrestin-2	Arrb2	-0.065185	0.744325
LIM and senescent cell antigen-like-containing domain protein 1	Lims1	-0.138767	0.423071
BRCA1-associated protein	Brap	-0.0173642	0.92623
Pre-mRNA-splicing factor SPF27	Bcas2	-0.164069	0.443273
Peroxisomal acyl-coenzyme A oxidase 3	Acox3	-0.0152872	0.908635
Interferon-activable protein 202	Ifi202	-0.0220884	0.96212
Nuclear receptor corepressor 2	Ncor2	-0.0137709	0.933744
cAMP-dependent protein kinase catalytic subunit beta	Prkacb	-0.155949	0.483708
Acidic leucine-rich nuclear phosphoprotein 32 family member E	Anp32e	0.0842252	0.596357
28S ribosomal protein S31, mitochondrial	Mrps31	-0.117185	0.507953
HEAT repeat-containing protein 5B	Heatr5b	-0.0188087	0.911218
NmrA-like family domain-containing protein 1	Nmral1	-0.105803	0.495903
U3 small nucleolar ribonucleoprotein protein IMP3	Imp3	-0.0149308	0.955206
Proline-serine-threonine phosphatase-interacting protein 2	Pstpip2	-0.0620375	0.683421
PDZ domain-containing protein GIPC1	Gipc1	0.206634	0.433161
Lysosomal acid lipase/cholesteryl ester hydrolase	Lipa	-0.192077	0.445641
Phosphomannomutase 2	Pmm2	-0.00377537	0.971628
Galectin-9	Lgals9	-0.190699	0.470705
26S proteasome non-ATPase regulatory subunit 4	Psmd4	-0.069018	0.588942
Muskelin	Mkln1	-0.151622	0.330453
Serum albumin	ALB	NA	NA
Delta-aminolevulinic acid dehydratase	Alad	-0.320774	0.263659
Hydroxymethylglutaryl-CoA lyase, mitochondrial	Hmgcl	-0.355461	0.435022
Protein mago nashi homolog	Magoh	-0.241456	0.28467
Protein FRG1	Frg1	-0.155361	0.502885
Putative phospholipase B-like 2	Plbd2	0.0359782	0.897217
RNA exonuclease 4	Rexo4	-0.152108	0.54994
Pre-mRNA-splicing factor RBM22	Rbm22	0.0975511	0.578216
Neurolysin, mitochondrial	Nln	-0.193015	0.28467
Dynein light chain 2, cytoplasmic	Dynll2	0.263915	0.541859
Oligoribonuclease, mitochondrial	Rexo2	-0.104431	0.497978
Exportin-4	Xpo4	-0.113705	0.689963
S-phase kinase-associated protein 1	Skp1	0.0927085	0.474408
TNFAIP3-interacting protein 1	Tnip1	-0.131017	0.604922
Protein virilizer homolog	Virma	-0.0688319	0.810947
Transcriptional repressor NF-X1	Nfx1	0.0237848	0.940158
THO complex subunit 6 homolog	Thoc6	-0.169542	0.454157
UDP-glucuronosyltransferase 1A7	Ugt1a7	-0.171681	0.421962
Cytohesin-4	Cyth4	-0.054768	0.553603
Serine/threonine-protein phosphatase 4 regulatory subunit 3B	Ppp4r3b	0.0797164	0.523018
Tapasin	Tapbp	-0.446238	0.25924
Protein sel-1 homolog 1	Sel1l	-0.26041	0.288974
Cytoplasmic dynein 1 intermediate chain 2	Dync1i2	-0.00852098	0.965989
Thymidylate synthase	Tyms	0.0256144	0.85354
ATP-binding cassette sub-family D member 1	Abcd1	0.109462	0.429865
DNA-binding protein Ikaros	Ikzf1	0.12345	0.484203
Caseinolytic peptidase B protein homolog	Clpb	0.0467193	0.661306
Endophilin-A2	Sh3gl1	0.139246	0.556904
FH1/FH2 domain-containing protein 1	Fhod1	-0.0250346	0.911638
Hematopoietic prostaglandin D synthase	Hpgds	-0.218369	0.419287
Zinc finger E-box-binding homeobox 2	Zeb2	-0.0635514	0.774041
URB2 ribosome biogenesis 2 homolog (S. cerevisiae)	Urb2	-0.0979215	0.649963
MLV-related proviral Env polyprotein	NA	-0.30493	0.323515
Cyclin-dependent kinase 7	Cdk7	0.100854	0.645403
TRAF-type zinc finger domain-containing protein 1	Trafd1	-0.572685	0.199576
RNA polymerase II elongation factor ELL2	Ell2	-0.266237	0.438626
Cystatin-B	Cstb	-0.43273	0.308042
Leucine-rich repeat flightless-interacting protein 2	Lrrfip2	0.0383456	0.816314
Exocyst complex component 7	Exoc7	-0.220476	0.269529
Protein S100-A4	S100a4	-0.208301	0.563806
Tyrosine-protein kinase JAK1	Jak1	0.00106738	0.995127
Putative sodium-coupled neutral amino acid transporter 10	Slc38a10	0.0108416	0.958141
Serine/threonine-protein kinase MRCK beta	Cdc42bpb	-0.094338	0.717774
Pumilio homolog 2	Pum2	-0.0202262	0.930778
Mitofusin-1	Mfn1	-0.17668	0.432442
RNA-binding protein 4;RNA-binding protein 4B	Rbm4;Rbm4b	-0.192405	0.383253
Toll-like receptor 2	Tlr2	-0.242445	0.453898
Erbin	Erbin	-0.195457	0.615253
Kinetochore-associated protein 1	Kntc1	-0.0740872	0.579224
Solute carrier organic anion transporter family member 4A1	Slco4a1	-0.336412	0.355748
Tumor necrosis factor alpha-induced protein 8-like protein 2	Tnfaip8l2	0.322841	0.336051
Zinc finger, MYND-type-containing 8	Zmynd8	0.180783	0.474408
Stathmin	Stmn1	0.139799	0.396658
[truncated: 4,073 more rows]

## Sheet: RAW_LPS_sgPSMB7_vs_LPS_sgROSA
Protein names	Gene names	logFC_LPS_sgPSMB7 vs LPS_sgROSA	adj.P.Val_LPS_sgPSMB7 vs LPS_sgROSA
Plectin	Plec	-0.20666	0.00307329
AHNAK nucleoprotein (desmoyokin)	Ahnak	0.0487285	0.356126
Cytoplasmic dynein 1 heavy chain 1	Dync1h1	0.358927	0.000653123
Microtubule-actin cross-linking factor 1	Macf1	0.0821741	0.0924487
E3 ubiquitin-protein ligase RNF213	Rnf213	-0.64241	0.000308225
Myosin-9	Myh9	0.133119	0.0130329
Talin-1	Tln1	0.300407	0.00114328
Clathrin heavy chain 1	Cltc	-0.00374991	0.956077
Filamin-B	Flnb	0.0561308	0.12228
Pyruvate kinase PKM	Pkm	0.00509807	0.94076
Filamin-A	Flna	0.0217477	0.536281
Fatty acid synthase	Fasn	-0.00987093	0.806747
Ras GTPase-activating-like protein IQGAP1	Iqgap1	0.10967	0.0214986
Proliferation marker protein Ki-67	Mki67	0.976712	0.000378724
E3 SUMO-protein ligase RanBP2	Ranbp2	-0.0542372	0.265081
E3 ubiquitin-protein ligase UBR4	Ubr4	0.387538	0.000859738
eIF-2-alpha kinase activator GCN1	Gcn1	0.0384977	0.392354
Heat shock protein HSP 90-beta	Hsp90ab1	0.0438302	0.464271
U5 small nuclear ribonucleoprotein 200 kDa helicase	Snrnp200	-0.132584	0.0119065
Prolow-density lipoprotein receptor-related protein 1	Lrp1	0.0792559	0.107162
Pre-mRNA-processing-splicing factor 8	Prpf8	-0.137782	0.0158123
Heterogeneous nuclear ribonucleoprotein M	Hnrnpm	-0.0902865	0.302347
Nucleoprotein TPR	Tpr	-0.12659	0.031388
Heat shock cognate 71 kDa protein	Hspa8	0.169779	0.0085388
Actin, cytoplasmic 1	Actb	-0.140738	0.103451
Chromodomain-helicase-DNA-binding protein 4	Chd4	0.00300946	0.959356
Midasin	Mdn1	-0.035923	0.49932
Alpha-2-macroglobulin	A2M	NA	NA
Myb-binding protein 1A	Mybbp1a	-0.200942	0.00360733
CAD protein	Cad	0.0693016	0.336267
Plastin-2	Lcp1	0.0122016	0.79159
Bifunctional glutamate/proline--tRNA ligase	Eprs1	0.16741	0.0163184
Vimentin	Vim	-0.232396	0.00447933
Transitional endoplasmic reticulum ATPase	Vcp	0.32624	0.0016396
Elongation factor 2	Eef2	-0.273376	0.00667134
60 kDa heat shock protein, mitochondrial	Hspd1	-0.261579	0.00701825
Vacuolar protein sorting-associated protein 13C	Vps13c	0.137653	0.0273986
Glyceraldehyde-3-phosphate dehydrogenase	Gapdh	-0.0204454	0.748652
Prelamin-A/C	Lmna	-0.133087	0.0106321
Heat shock 70 kDa protein 4	Hspa4	0.0420918	0.442675
Dedicator of cytokinesis protein 2	Dock2	0.180491	0.0126665
Myoferlin	Myof	-0.239026	0.00312029
Leucine-rich PPR motif-containing protein, mitochondrial	Lrpprc	-0.211637	0.00444118
T-complex protein 1 subunit gamma	Cct3	0.181941	0.0171533
Nuclear mitotic apparatus protein 1	Numa1	0.0230658	0.612109
Vigilin	Hdlbp	0.145869	0.0153855
Eukaryotic translation initiation factor 3 subunit A	Eif3a	0.00100579	0.985978
Proteasome adapter and scaffold protein ECM29	Ecpas	0.242184	0.00262609
ATP-dependent RNA helicase DDX3X	Ddx3x	-0.0324228	0.546586
Arginine--tRNA ligase, cytoplasmic	Rars1	0.130962	0.019701
Afadin	Afdn	0.0793338	0.1781
Fructose-bisphosphate aldolase A	Aldoa	0.01572	0.830209
Importin-5	Ipo5	-0.123584	0.0281913
Endoplasmin	Hsp90b1	-0.119274	0.0510171
Trifunctional enzyme subunit alpha, mitochondrial	Hadha	-0.201167	0.0122401
HEAT repeat-containing protein 1	Heatr1	-0.36729	0.00113054
Uncharacterized protein	APOB	NA	NA
Cytoskeleton-associated protein 5	Ckap5	0.239901	0.00548699
Nucleolar RNA helicase 2	Ddx21	-0.359944	0.000639247
Alpha-actinin-1	Actn1	0.107268	0.0179992
Coatomer subunit alpha	Copa	0.239496	0.00296574
Glucose-6-phosphate 1-dehydrogenase X	G6pdx	-0.12378	0.0139475
Sarcoplasmic/endoplasmic reticulum calcium ATPase 2	Atp2a2	-0.223129	0.00357476
Coatomer subunit beta	Copb1	0.174968	0.0117927
Eukaryotic translation initiation factor 4 gamma 1	Eif4g1	0.059648	0.136274
Trifunctional purine biosynthetic protein adenosine-3	Gart	-0.00426635	0.946751
Phosphoglycerate kinase 1	Pgk1	0.0244558	0.614786
Heat shock protein 105 kDa	Hsph1	0.284303	0.000798261
Sodium/potassium-transporting ATPase subunit alpha-1	Atp1a1	-0.0825546	0.100677
Alpha-enolase	Eno1	-0.0683779	0.272677
Protein RRP5 homolog	Pdcd11	-0.281368	0.00234143
Staphylococcal nuclease domain-containing protein 1	Snd1	-0.086138	0.0404652
Hexokinase-2	Hk2	-0.496388	0.00120086
Small subunit processome component 20 homolog	Utp20	-0.0541583	0.30113
Leucine--tRNA ligase, cytoplasmic	Lars1	0.0499324	0.353612
ATP-dependent RNA helicase A	Dhx9	-0.217407	0.0061973
Structural maintenance of chromosomes protein 1A	Smc1a	-0.0768372	0.0881526
Splicing factor 3B subunit 1	Sf3b1	-0.235989	0.00206222
Ubiquitin-like modifier-activating enzyme 1	Uba1	0.0400771	0.304345
UDP-glucose:glycoprotein glucosyltransferase 1	Uggt1	-0.011764	0.807855
Rab GDP dissociation inhibitor beta	Gdi2	0.0730014	0.190511
Monofunctional C1-tetrahydrofolate synthase, mitochondrial	Mthfd1l	-0.331486	0.000827374
DNA (cytosine-5)-methyltransferase 1	Dnmt1	0.0837408	0.100127
Bifunctional purine biosynthesis protein ATIC	Atic	0.0980517	0.0516662
Transketolase	Tkt	0.0507203	0.221649
Splicing factor, proline- and glutamine-rich	Sfpq	-0.155902	0.0997847
DNA topoisomerase 2-alpha	Top2a	0.370811	0.00177415
CCR4-NOT transcription complex subunit 1	Cnot1	0.121289	0.0336077
Splicing factor 3B subunit 3	Sf3b3	-0.233168	0.0433518
Ribosome-binding protein 1	Rrbp1	-0.397941	0.000394035
E3 ubiquitin-protein ligase HUWE1	Huwe1	0.159101	0.0226971
Structural maintenance of chromosomes protein 3	Smc3	-0.102505	0.0699924
Structural maintenance of chromosomes flexible hinge domain-containing protein 1	Smchd1	-0.145188	0.0408165
DNA damage-binding protein 1	Ddb1	0.272649	0.00266182
Fermitin family homolog 3	Fermt3	0.130961	0.0782733
Endoplasmic reticulum chaperone BiP	Hspa5	0.0260484	0.564427
Hexokinase-1	Hk1	-0.256646	0.00767046
Alanine--tRNA ligase, cytoplasmic	Aars1	0.50701	0.000308225
N-alpha-acetyltransferase 15, NatA auxiliary subunit	Naa15	0.0535489	0.333842
T-complex protein 1 subunit alpha	Tcp1	0.0136323	0.815819
Aconitate hydratase, mitochondrial	Aco2	-0.0673709	0.246839
Lamin-B1	Lmnb1	-0.295116	0.00150879
Protein disulfide-isomerase A3	Pdia3	-0.1181	0.01753
Alpha-actinin-4	Actn4	0.0718301	0.061846
Kinesin-1 heavy chain	Kif5b	0.225995	0.00177415
Valine--tRNA ligase	Vars1	0.0307674	0.461098
DNA replication licensing factor MCM6	Mcm6	-0.00182691	0.975052
Cullin-associated NEDD8-dissociated protein 1	Cand1	0.0573897	0.139489
Lon protease homolog, mitochondrial	Lonp1	-0.0544194	0.161173
Spectrin alpha chain, non-erythrocytic 1	Sptan1	2.46724	3.61817e-05
Phosphatidylinositol 3,4,5-trisphosphate 5-phosphatase 1	Inpp5d	0.191876	0.00541408
Moesin	Msn	0.0807565	0.103175
T-complex protein 1 subunit beta	Cct2	0.0870165	0.0426992
Adenylyl cyclase-associated protein 1	Cap1	-0.0373982	0.441627
V-type proton ATPase catalytic subunit A	Atp6v1a	0.30221	0.00479248
Transferrin receptor protein 1	Tfrc	-0.701088	0.000275043
Early endosome antigen 1	Eea1	-0.0363738	0.36844
T-complex protein 1 subunit theta	Cct8	0.210375	0.00264563
Stress-70 protein, mitochondrial	Hspa9	-0.237897	0.0143122
Tubulin beta-2A chain	Tubb2a	0.13004	0.0694633
Heat shock protein HSP 90-alpha	Hsp90aa1	0.213787	0.0026895
6-phosphogluconate dehydrogenase, decarboxylating	Pgd	0.0359621	0.507782
DNA replication licensing factor MCM2	Mcm2	-0.0634724	0.268073
Isoleucine--tRNA ligase, cytoplasmic	Iars1	0.0978452	0.0575695
T-complex protein 1 subunit epsilon	Cct5	0.0471699	0.256115
RNA cytidine acetyltransferase	Nat10	-0.245858	0.0017221
E3 ubiquitin-protein ligase HECTD1	Hectd1	0.190671	0.0130536
Elongation factor 1-alpha 1	Eef1a1	-0.200536	0.0144671
RNA cytosine C(5)-methyltransferase NSUN2	Nsun2	-0.0199569	0.535034
Nuclear pore complex protein Nup93	Nup93	0.0147696	0.822103
Dynactin subunit 1	Dctn1	0.237775	0.00636801
Cytoplasmic FMR1-interacting protein 1	Cyfip1	0.148873	0.0196323
Major vault protein	Mvp	0.108662	0.028571
Protein PRRC2C	Prrc2c	0.267779	0.00407135
Tyrosine-protein kinase BAZ1B	Baz1b	-0.165866	0.0177959
Filamin-C	Flnc	0.470658	0.000378724
Antiviral innate immune response receptor RIG-I	Ddx58	-0.333982	0.00145147
Pre-mRNA-splicing factor ATP-dependent RNA helicase DHX15	Dhx15	-0.179505	0.0186205
Phosphoribosylformylglycinamidine synthase	Pfas	-0.0428139	0.317804
Unconventional myosin-XVIIIa	Myo18a	0.139926	0.0482933
2-oxoglutarate dehydrogenase, mitochondrial	Ogdh	-0.299559	0.00347951
Glucose-6-phosphate isomerase	Gpi	-0.0187892	0.712222
Tripeptidyl-peptidase 2	Tpp2	0.0031902	0.930314
26S proteasome non-ATPase regulatory subunit 2	Psmd2	0.290591	0.000819966
Vinculin	Vcl	0.0780735	0.160218
Nucleoporin 205	Nup205	-0.0523951	0.262598
Regulator of nonsense transcripts 1	Upf1	0.117244	0.0428299
Creatine kinase B-type	Ckb	0.358766	0.000909278
SWI/SNF-related matrix-associated actin-dependent regulator of chromatin subfamily A member 5	Smarca5	-0.145225	0.0404239
DNA replication licensing factor MCM3	Mcm3	-0.0433048	0.26896
Peptidyl-prolyl cis-trans isomerase FKBP4	Fkbp4	0.0703586	0.403044
Tyrosine-protein phosphatase non-receptor type 6	Ptpn6	0.0589603	0.311939
Tubulin alpha-1C chain	Tuba1c	0.150868	0.0185277
Poly [ADP-ribose] polymerase 1	Parp1	0.151276	0.0687657
CCAAT/enhancer-binding protein zeta	Cebpz	-0.300789	0.00377533
Non-POU domain-containing octamer-binding protein	Nono	-0.223988	0.0374178
Golgi autoantigen, golgin subfamily b, macrogolgin 1	Golgb1	-0.0249388	0.71252
ATP synthase subunit beta, mitochondrial	Atp5f1b	-0.23349	0.00298092
C-1-tetrahydrofolate synthase, cytoplasmic	Mthfd1	0.0348662	0.443629
Exportin-2	Cse1l	0.00300861	0.943692
Protein disulfide-isomerase A4	Pdia4	-0.153967	0.00583176
CAP-Gly domain-containing linker protein 1	Clip1	0.271192	0.00238613
Structural maintenance of chromosomes protein 2	Smc2	0.103239	0.0651699
Nuclear migration protein nudC	Nudc	0.106776	0.0577394
Helicase with zinc finger domain 2	Helz2	-0.267612	0.00463193
DNA-directed RNA polymerase II subunit RPB1	Polr2a	-0.0671276	0.233809
T-complex protein 1 subunit delta	Cct4	0.023854	0.474734
Probable ATP-dependent RNA helicase DDX17	Ddx17	-0.0790365	0.140752
Probable ATP-dependent RNA helicase DDX5	Ddx5	-0.171064	0.0124939
1-phosphatidylinositol 4,5-bisphosphate phosphodiesterase gamma-2	Plcg2	0.139062	0.0332166
26S proteasome regulatory subunit 8	Psmc5	0.404749	0.000446237
Endoplasmic reticulum aminopeptidase 1	Erap1	-0.308756	0.00177415
26S proteasome regulatory subunit 6A	Psmc3	0.488989	0.000335083
DNA ligase 1	Lig1	0.250908	0.00315365
Methionine--tRNA ligase, cytoplasmic	Mars1	0.0686702	0.104654
Exosome RNA helicase MTR4	Mtrex	-0.165159	0.140771
Ubiquitin-like modifier-activating enzyme 6	Uba6	0.0402873	0.416384
Eukaryotic translation initiation factor 4 gamma 2	Eif4g2	-0.0169825	0.741432
Polyadenylate-binding protein 1	Pabpc1	-0.171754	0.0278735
DNA replication licensing factor MCM5	Mcm5	-0.110339	0.0546824
Gelsolin	Gsn	0.350233	0.00222716
Acetyl-CoA carboxylase 1	Acaca	0.00118864	0.979706
MICOS complex subunit Mic60	Immt	-0.199634	0.00547342
Interleukin enhancer-binding factor 3	Ilf3	-0.15808	0.0152299
Protein disulfide-isomerase	P4hb	-0.365776	0.00110882
T-complex protein 1 subunit eta	Cct7	0.0384443	0.360916
Hypoxia up-regulated protein 1	Hyou1	-0.286693	0.00245127
Dihydropyrimidinase-related protein 2	Dpysl2	0.0629216	0.151156
Lysine--tRNA ligase	Kars1	-0.0798803	0.110878
Cytosolic non-specific dipeptidase	Cndp2	0.0980001	0.121624
E3 ubiquitin-protein ligase TRIP12	Trip12	0.0505795	0.293278
Importin subunit beta-1	Kpnb1	-0.00735521	0.88649
Nucleolin	Ncl	-0.215483	0.0212495
Protein mono-ADP-ribosyltransferase PARP14	Parp14	-0.516531	0.000608383
Coiled-coil domain-containing protein 88B	Ccdc88b	0.148585	0.0542167
Golgin subfamily A member 4	Golga4	0.0502849	0.397773
NADPH--cytochrome P450 reductase	Por	-0.467504	0.00113054
DnaJ heat shock protein family (Hsp40) member C13	Dnajc13	-0.127022	0.0392566
Insulin-degrading enzyme	Ide	0.245226	0.00425125
116 kDa U5 small nuclear ribonucleoprotein component	Eftud2	-0.0697403	0.120216
Histone-binding protein RBBP7	Rbbp7	0.073709	0.327984
Signal transducer and activator of transcription 1	Stat1	-0.473429	0.000778975
EH domain-containing protein 4	Ehd4	-0.117908	0.0193558
Ubiquitin carboxyl-terminal hydrolase 14	Usp14	0.184543	0.0108484
Exportin-1	Xpo1	-0.126601	0.0577753
Nuclear pore complex protein Nup214	Nup214	-0.00472158	0.950287
Heme oxygenase 1	Hmox1	-0.240681	0.0118555
Rho guanine nucleotide exchange factor 2	Arhgef2	0.108201	0.050853
Cytosol aminopeptidase	Lap3	-0.0605388	0.198408
Heat shock 70 kDa protein 4L	Hspa4l	0.41873	0.00114328
SWI/SNF complex subunit SMARCC1	Smarcc1	-0.135961	0.0568486
Nuclear pore complex protein Nup155	Nup155	-0.122903	0.0311638
Serum albumin	ALB	NA	NA
Annexin A5	Anxa5	-0.0661392	0.284445
Fumarate hydratase, mitochondrial	Fh	-0.0977318	0.0691065
Neutral alpha-glucosidase AB	Ganab	-0.117748	0.0357702
Serine/arginine repetitive matrix protein 2	Srrm2	-0.0497606	0.563374
Transcription intermediary factor 1-beta	Trim28	-0.104532	0.0235554
Probable ubiquitin carboxyl-terminal hydrolase FAF-X	Usp9x	0.137855	0.0178563
ATP synthase subunit alpha, mitochondrial	Atp5f1a	-0.275255	0.00335766
STE20-like serine/threonine-protein kinase	Slk	0.200457	0.00332337
Nucleolar protein 56	Nop56	-0.240523	0.00185905
DNA repair protein RAD50	Rad50	-0.0489515	0.238539
Annexin A2	Anxa2	-0.241158	0.013837
Structural maintenance of chromosomes protein 4	Smc4	0.0534255	0.201785
Serrate RNA effector molecule homolog	Srrt	0.00542527	0.930486
Coatomer subunit beta'	Copb2	0.188142	0.0170777
2'-5'-oligoadenylate synthase 3	Oas3	0.0326467	0.423993
Thyroid hormone receptor-associated protein 3	Thrap3	-0.180562	0.0160186
26S proteasome non-ATPase regulatory subunit 3	Psmd3	0.320594	0.018381
Ubiquitin carboxyl-terminal hydrolase 5	Usp5	0.280896	0.000974826
Delta-1-pyrroline-5-carboxylate synthase	Aldh18a1	-0.160997	0.012771
Vesicle-fusing ATPase	Nsf	-0.00694935	0.885476
DNA replication licensing factor MCM4	Mcm4	-0.0932326	0.13967
Eukaryotic translation initiation factor 4 gamma 3	Eif4g3	0.131826	0.053624
FACT complex subunit SPT16	Supt16h	-0.102824	0.0614022
Protein flightless-1 homolog	Flii	0.107316	0.0712314
L-lactate dehydrogenase A chain	Ldha	-0.0870143	0.0408883
Symplekin	Sympk	-0.0147258	0.732163
Glutamine--tRNA ligase	Qars1	-0.0892071	0.12891
Serine hydroxymethyltransferase, mitochondrial	Shmt2	-0.188536	0.00665241
Splicing factor 3b, subunit 2	Sf3b2	-0.0583673	0.125353
26S proteasome non-ATPase regulatory subunit 6	Psmd6	0.198063	0.00322462
Annexin A1	Anxa1	0.0571972	0.471085
Glutamine--fructose-6-phosphate aminotransferase [isomerizing] 1	Gfpt1	0.0524188	0.361404
Clustered mitochondria protein homolog	Cluh	0.169598	0.0123546
GRIP1-associated protein 1	Gripap1	0.0946673	0.0756479
60S ribosomal protein L5	Rpl5	-0.235428	0.0259045
Eukaryotic translation initiation factor 3 subunit C	Eif3c	0.14341	0.0148889
Carboxypeptidase D	Cpd	-0.473362	0.000429141
26S proteasome non-ATPase regulatory subunit 1	Psmd1	0.253701	0.0140402
Kinectin	Ktn1	-0.287406	0.00605401
NADH-ubiquinone oxidoreductase 75 kDa subunit, mitochondrial	Ndufs1	-0.0537624	0.333842
Stress-induced-phosphoprotein 1	Stip1	0.0652782	0.257603
Elongation factor Tu, mitochondrial	Tufm	-0.166055	0.0119118
RuvB-like 1	Ruvbl1	0.0111731	0.811971
Malate dehydrogenase, mitochondrial	Mdh2	-0.230424	0.00400113
Glycerol-3-phosphate dehydrogenase, mitochondrial	Gpd2	-0.251713	0.00323278
Switch-associated protein 70	Swap70	0.0690264	0.100347
RuvB-like 2	Ruvbl2	0.0129788	0.811527
THO complex subunit 2	Thoc2	-0.320532	0.00316048
Receptor-type tyrosine-protein phosphatase C	Ptprc	-0.0793166	0.109239
Double-stranded RNA-specific adenosine deaminase	Adar	-0.0333514	0.419959
Heterogeneous nuclear ribonucleoprotein U	Hnrnpu	-0.227397	0.0092091
DNA replication licensing factor MCM7	Mcm7	-0.105406	0.104654
Baculoviral IAP repeat-containing protein 6	Birc6	0.373035	0.0013893
Aldo-keto reductase family 1 member B1	Akr1b1	0.0782662	0.315191
Serotransferrin	TF	NA	NA
Probable ATP-dependent RNA helicase DDX46	Ddx46	-0.12231	0.0395948
La-related protein 1	Larp1	0.00182161	0.976988
Calnexin	Canx	-0.191174	0.00639572
Cysteine--tRNA ligase, cytoplasmic	Cars1	0.238343	0.00602489
Eukaryotic initiation factor 4A-I	Eif4a1	0.116737	0.05105
General vesicular transport factor p115	Uso1	0.145598	0.0119223
Eukaryotic translation initiation factor 5B	Eif5b	0.109173	0.0403132
Septin-2	Septin2	0.113884	0.0868353
Heterogeneous nuclear ribonucleoprotein R	Hnrnpr	-0.212221	0.00548699
GMP synthase [glutamine-hydrolyzing]	Gmps	0.0976953	0.110482
AP-1 complex subunit beta-1	Ap1b1	0.0274156	0.623014
Heterogeneous nuclear ribonucleoprotein A1	Hnrnpa1	-0.247164	0.00503471
Host cell factor 1	Hcfc1	-0.151319	0.0163697
Calcium-binding mitochondrial carrier protein Aralar1	Slc25a12	-0.456807	0.000977317
Asparagine--tRNA ligase, cytoplasmic	NARS1	0.281287	0.00207254
Eukaryotic translation initiation factor 3 subunit B	Eif3b	0.0110062	0.814588
ATP-citrate synthase	Acly	0.0431881	0.461833
Unconventional myosin-Va	Myo5a	0.0588495	0.201213
DnaJ homolog subfamily C member 7	Dnajc7	0.202244	0.00347948
Transducin beta-like protein 3	Tbl3	-0.0406938	0.556278
Cullin-2	Cul2	-0.000786364	0.991115
Ran GTPase-activating protein 1	Rangap1	0.292948	0.00102971
Aspartate--tRNA ligase, cytoplasmic	Dars1	0.00777882	0.859408
Phosphoglucomutase-1	Pgm1	-0.0379652	0.430825
Elongation factor G, mitochondrial	Gfm1	-0.191138	0.0332166
Heterogeneous nuclear ribonucleoprotein L	Hnrnpl	-0.184413	0.025917
GTP-binding protein 4	Gtpbp4	-0.19596	0.00813432
Protein-tyrosine kinase 2-beta	Ptk2b	0.159732	0.00978648
Putative helicase MOV-10	Mov10	-0.450623	0.000529965
Nodal modulator 1	Nomo1	-0.119154	0.050537
Prolyl endopeptidase	Prep	0.00679622	0.940521
26S proteasome regulatory subunit 7	Psmc2	0.287367	0.0015751
Protein mono-ADP-ribosyltransferase PARP9	Parp9	-0.379629	0.00097477
Plexin-B2	Plxnb2	-0.264056	0.0085388
Golgin subfamily A member 3	Golga3	-0.0999131	0.119209
Cold shock domain-containing protein E1	Csde1	0.104162	0.132777
Programmed cell death 6-interacting protein	Pdcd6ip	0.229894	0.00338552
Pyruvate carboxylase, mitochondrial	Pc	-0.265158	0.0121139
Serine/threonine-protein kinase PAK 2	Pak2	0.0985385	0.0424601
ADP/ATP translocase 2	Slc25a5	-0.420232	0.00862116
Protein RCC2	Rcc2	0.0489883	0.438947
Polypyrimidine tract-binding protein 1	Ptbp1	-0.202325	0.00889408
60S ribosomal protein L3	Rpl3	-0.208617	0.00622444
Enhancer of mRNA-decapping protein 4	Edc4	0.164295	0.0458184
Apolipoprotein B receptor	Apobr	0.0662022	0.334418
Triosephosphate isomerase	Tpi1	0.0597635	0.168762
Coatomer subunit delta	Arcn1	0.0964282	0.210217
Reticulon-4	Rtn4	-0.113268	0.0535644
Matrin-3	Matr3	-0.24524	0.00150698
ATP-dependent RNA helicase DDX1	Ddx1	-0.0216176	0.574583
Biorientation of chromosomes in cell division protein 1-like 1	Bod1l	0.0876469	0.338311
Ubiquitin carboxyl-terminal hydrolase 7	Usp7	-0.0571743	0.34721
Ribonuclease inhibitor	Rnh1	0.355835	0.000503283
Vacuolar protein sorting-associated protein 35	Vps35	0.06319	0.16912
WD repeat-containing protein 1	Wdr1	0.116453	0.106693
Heterogeneous nuclear ribonucleoprotein K	Hnrnpk	-0.130975	0.0191711
RRP12-like protein	Rrp12	-0.173768	0.0425969
Transcription elongation regulator 1	Tcerg1	-0.134416	0.032166
Golgin subfamily A member 2	Golga2	-0.200837	0.0118565
Proliferating cell nuclear antigen	Pcna	0.0791967	0.0584136
Homeobox protein cut-like 1	Cux1	0.0714921	0.229341
ATP-binding cassette sub-family F member 1	Abcf1	0.0895369	0.20609
Threonine--tRNA ligase 1, cytoplasmic	Tars1	-0.00930383	0.803015
Golgi apparatus protein 1	Glg1	-0.471479	0.000463241
Sister chromatid cohesion protein PDS5 homolog A	Pds5a	-0.0471595	0.339848
Elongation factor 1-gamma	Eef1g	-0.167069	0.0457288
Arf-GAP with Rho-GAP domain, ANK repeat and PH domain-containing protein 1	Arap1	0.314853	0.0010247
Presequence protease, mitochondrial	Pitrm1	-0.145794	0.0254435
Eukaryotic translation initiation factor 3 subunit L	Eif3l	0.000362583	0.992773
Probable ATP-dependent RNA helicase DDX27	Ddx27	-0.197867	0.00481569
Nuclear valosin-containing protein-like	Nvl	-0.0403128	0.463411
Nucleophosmin	Npm1	-0.384598	0.00270823
UDP-N-acetylhexosamine pyrophosphorylase-like protein 1	Uap1l1	0.288047	0.00107538
Rho guanine nucleotide exchange factor 1	Arhgef1	0.232436	0.00825346
Cell division cycle 5-like protein	Cdc5l	-0.0558266	0.416273
Succinate dehydrogenase [ubiquinone] flavoprotein subunit, mitochondrial	Sdha	-0.166076	0.0212093
NSFL1 cofactor p47	Nsfl1c	0.432474	0.000477126
Lipopolysaccharide-responsive and beige-like anchor protein	Lrba	0.120379	0.196217
Unconventional myosin-Ie	Myo1e	0.0301231	0.507161
Catalase	Cat	-0.0922583	0.0401802
Syntaxin-binding protein 1	Stxbp1	-0.159863	0.0220671
Calreticulin	Calr	-0.15281	0.0180375
N-acetylgalactosaminyltransferase 7	Galnt7	-0.406674	0.00189536
26S proteasome non-ATPase regulatory subunit 11	Psmd11	0.279147	0.000866499
A-kinase anchor protein 9	Akap9	0.276548	0.0173042
Dolichyl-diphosphooligosaccharide--protein glycosyltransferase subunit 1	Rpn1	-0.258342	0.00217845
Nardilysin	Nrdc	0.164351	0.00736997
Ankyrin repeat and KH domain-containing 1	Ankhd1	0.308127	0.00364273
Rho guanine nucleotide exchange factor 7	Arhgef7	-0.234428	0.00501373
Aspartate aminotransferase, mitochondrial	Got2	-0.218423	0.00374788
Proliferation-associated protein 2G4	Pa2g4	-0.043026	0.317965
26S proteasome regulatory subunit 4	Psmc1	0.254031	0.00652736
Guanine nucleotide-binding protein-like 3	Gnl3	-0.17548	0.0316651
Intersectin-2	Itsn2	0.0100269	0.859701
Isocitrate dehydrogenase [NADP] cytoplasmic	Idh1	0.207103	0.0123546
Obg-like ATPase 1	Ola1	0.0276297	0.418109
Heterogeneous nuclear ribonucleoprotein U-like protein 2	Hnrnpul2	-0.104522	0.0353974
Polyribonucleotide nucleotidyltransferase 1, mitochondrial	Pnpt1	-0.410087	0.00388515
Exportin-5	Xpo5	0.090086	0.0887213
Protein transport protein Sec23B	Sec23b	0.0128839	0.813251
Serine--tRNA ligase, cytoplasmic	Sars1	0.290219	0.00283148
Cation-independent mannose-6-phosphate receptor	Igf2r	-0.0818358	0.204628
Unconventional myosin-Id	Myo1d	-0.100744	0.0897827
E3 ubiquitin-protein ligase UBR5	Ubr5	-0.0478329	0.572118
AP-3 complex subunit delta-1	Ap3d1	0.125501	0.0994447
AP-2 complex subunit alpha-1	Ap2a1	-0.0688308	0.266929
Deoxynucleoside triphosphate triphosphohydrolase SAMHD1	Samhd1	-0.511251	0.000378724
Spliceosome RNA helicase Ddx39b	Ddx39b	-0.287254	0.000941542
Thyroid hormone receptor interactor 11	Trip11	0.465845	0.00236899
Dihydrolipoyllysine-residue acetyltransferase component of pyruvate dehydrogenase complex, mitochondrial	Dlat	-0.21526	0.00785348
ATP-dependent RNA helicase DHX29	Dhx29	0.0737204	0.165465
Ubiquitin carboxyl-terminal hydrolase 4	Usp4	0.0829538	0.23662
Cytosolic phospholipase A2	Pla2g4a	0.147842	0.00888105
Serine/threonine-protein phosphatase 2A 65 kDa regulatory subunit A alpha isoform	Ppp2r1a	0.13483	0.0266891
1-phosphatidylinositol 4,5-bisphosphate phosphodiesterase	Plcb4	0.210296	0.0165328
Long-chain-fatty-acid--CoA ligase 4	Acsl4	-0.0979591	0.0516144
Protein diaphanous homolog 1	Diaph1	0.113693	0.115908
26S proteasome regulatory subunit 10B	Psmc6	0.450907	0.000394035
Exosome complex exonuclease RRP44	Dis3	0.0411863	0.507782
Nucleolar protein 58	Nop58	-0.220163	0.0143915
Processing of 1, ribonuclease P/MRP family, (S. cerevisiae)	Pop1	-0.0609308	0.215557
Probable RNA-binding protein 19	Rbm19	-0.220946	0.0130977
Isocitrate dehydrogenase [NAD] subunit, mitochondrial	Idh3b	-0.305393	0.00744998
Eukaryotic translation initiation factor 5	Eif5	0.432553	0.000653123
Rho GTPase-activating protein 45	Arhgap45	0.0423772	0.457176
ATPase family AAA domain-containing protein 3	Atad3	-0.161781	0.00706546
Protein arginine N-methyltransferase 1	Prmt1	-0.0831412	0.255644
Ataxin-10	Atxn10	0.658959	0.000394035
D-3-phosphoglycerate dehydrogenase	Phgdh	0.210792	0.0108147
Tyrosine--tRNA ligase, cytoplasmic	Yars1	0.121733	0.0837369
Platelet-activating factor acetylhydrolase IB subunit beta	Pafah1b1	0.214839	0.0536839
Constitutive coactivator of PPAR-gamma-like protein 1	FAM120A	0.0827574	0.0716776
Pre-mRNA-processing factor 6	Prpf6	0.0555054	0.21469
Actin-related protein 3	Actr3	-0.0066482	0.890604
Transcription elongation factor SPT5	Supt5h	0.227009	0.0205572
Nuclear cap-binding protein subunit 1	Ncbp1	-0.168869	0.0326091
Leucyl-cystinyl aminopeptidase	Lnpep	-0.0825684	0.363952
Exosome component 10	Exosc10	-0.165241	0.127961
Transcription elongation factor SPT6	Supt6h	0.380932	0.00236899
Rho guanine nucleotide exchange factor 6	Arhgef6	0.182565	0.0200134
Ubiquitin carboxyl-terminal hydrolase 15	Usp15	0.0264281	0.613954
von Willebrand factor A domain-containing protein 5A	Vwa5a	0.265445	0.00687187
Radixin	Rdx	0.0872903	0.269543
Coatomer subunit gamma-1	Copg1	0.187238	0.00885863
Plasma membrane calcium-transporting ATPase 1	Atp2b1	-0.147153	0.0232292
Succinyl-CoA:3-ketoacid coenzyme A transferase 1, mitochondrial	Oxct1	-0.224182	0.0328986
Protein SON	Son	0.0290754	0.563379
Asparagine synthetase [glutamine-hydrolyzing]	Asns	0.256362	0.00129865
Nuclear pore complex protein Nup98-Nup96	Nup98	-0.10514	0.0801323
Splicing factor 3A subunit 1	Sf3a1	-0.144184	0.00721937
60S ribosomal protein L4	Rpl4	-0.252642	0.00236899
Alpha-soluble NSF attachment protein	Napa	0.246416	0.0016396
Cis-aconitate decarboxylase	Acod1	-0.928579	0.000308225
DnaJ homolog subfamily A member 1	Dnaja1	0.469622	0.000976594
Nck-associated protein 1-like	Nckap1l	0.211241	0.0331473
Hsp70-binding protein 1	Hspbp1	0.217812	0.0267315
Apoptotic chromatin condensation inducer in the nucleus	Acin1	0.0748212	0.133913
Heterogeneous nuclear ribonucleoproteins A2/B1	Hnrnpa2b1	-0.283957	0.00785348
Receptor of activated protein C kinase 1	Rack1	-0.0351816	0.478918
WD40 repeat-containing protein SMU1	Smu1	-0.0059834	0.920328
Probable global transcription activator SNF2L2	Smarca2	0.10862	0.176258
Heterogeneous nuclear ribonucleoprotein A3	Hnrnpa3	-0.256906	0.0135146
26S proteasome non-ATPase regulatory subunit 12	Psmd12	0.166001	0.13967
Chloride intracellular channel protein 4	Clic4	0.0467796	0.269543
Eukaryotic translation initiation factor 3 subunit D	Eif3d	0.0200767	0.75064
Adenosylhomocysteinase	Ahcy	-0.107269	0.0528076
Elongation factor 1-alpha 2	Eef1a2	-0.266337	0.0101381
Protein transport protein Sec31A	Sec31a	0.23848	0.00577028
Xaa-Pro aminopeptidase 1	Xpnpep1	0.0194977	0.639397
Nuclear autoantigenic sperm protein	Nasp	-0.112061	0.13987
Signal recognition particle receptor subunit alpha	Srpra	-0.430093	0.000380218
Cytospin-B	Specc1	0.0283458	0.632495
Zinc finger protein 638	Znf638	-0.0226892	0.574583
Eukaryotic translation initiation factor 3 subunit F	Eif3f	-0.0753834	0.229838
Glutamate dehydrogenase 1, mitochondrial	Glud1	-0.208608	0.00291667
40S ribosomal protein S3	Rps3	-0.134437	0.0880783
Far upstream element-binding protein 2	Khsrp	-0.0950918	0.031016
Inactive tyrosine-protein kinase PEAK1	Peak1	-0.364013	0.00189352
Engulfment and cell motility protein 1	Elmo1	0.326174	0.00150879
Scaffold attachment factor B1	Safb	-0.113671	0.0445161
Activating signal cointegrator 1 complex subunit 3	Ascc3	-0.234875	0.00826924
ATP-binding cassette sub-family E member 1	Abce1	0.0368898	0.403818
Condensin complex subunit 1	Ncapd2	0.133576	0.0500478
Heat shock protein 75 kDa, mitochondrial	Trap1	-0.215995	0.00514312
Eukaryotic translation initiation factor 3 subunit I	Eif3i	0.0654254	0.336998
Ubiquitin carboxyl-terminal hydrolase 25	Usp25	-0.222056	0.00278947
Phosphatidylinositol-3-phosphatase SAC1	Sacm1l	-0.091559	0.14535
Cullin-3	Cul3	0.0922049	0.177684
GTPase-activating protein and VPS9 domain-containing protein 1	Gapvd1	0.15404	0.0265784
RNA polymerase-associated protein CTR9 homolog	Ctr9	-0.0911381	0.165719
SUMO-activating enzyme subunit 2	Uba2	-0.0165633	0.837177
Peroxisomal multifunctional enzyme type 2	Hsd17b4	-0.000218385	0.997677
Annexin A7	Anxa7	0.112184	0.0633152
Rho-associated protein kinase 1	Rock1	0.17553	0.0138757
General transcription factor II-I	Gtf2i	0.0979427	0.0552806
Lupus La protein homolog	Ssb	-0.0348941	0.355732
DNA mismatch repair protein Msh6	Msh6	0.0347749	0.512762
UMP-CMP kinase 2, mitochondrial	Cmpk2	-0.511881	0.000298972
Protein phosphatase 1 regulatory subunit 7	Ppp1r7	0.0861789	0.144131
Pumilio homolog 3	Pum3	-0.175997	0.0376469
14-3-3 protein epsilon	Ywhae	-0.0165315	0.658967
Peptidyl-prolyl cis-trans isomerase A	Ppia	0.0186506	0.751913
Microtubule-associated protein 4	Map4	-0.0536349	0.342115
Interferon-induced transmembrane protein 3	Ifitm3	-0.592378	0.00144966
Cathepsin B	Ctsb	-0.210605	0.0153206
ATP-dependent RNA helicase DDX42	Ddx42	-0.0573643	0.281502
Importin-7	Ipo7	-0.112022	0.170704
26S proteasome regulatory subunit 6B	Psmc4	0.3327	0.000477126
V-type proton ATPase subunit B, brain isoform	Atp6v1b2	-0.020793	0.770628
Thimet oligopeptidase	Thop1	0.112011	0.0156639
Protein Niban 2	Niban2	0.0804447	0.260357
Phosphoserine aminotransferase	Psat1	0.111394	0.020927
ATP-binding cassette sub-family F member 2	Abcf2	-0.0463365	0.244852
Formin-like protein 1	Fmnl1	-0.0517326	0.496801
26S proteasome non-ATPase regulatory subunit 13	Psmd13	0.205917	0.0193558
Succinate--CoA ligase [GDP-forming] subunit beta, mitochondrial	Suclg2	-0.207108	0.0044584
Heterogeneous nuclear ribonucleoprotein H	Hnrnph1	-0.040665	0.457284
Centrosome-associated protein CEP250	Cep250	0.249105	0.0163697
Transport and Golgi organization protein 1 homolog	Mia3	0.0898519	0.26091
NFX1-type zinc finger-containing protein 1	Znfx1	-0.151138	0.0374883
Glutaminase kidney isoform, mitochondrial	Gls	-0.22912	0.00548935
Leukotriene A-4 hydrolase	Lta4h	0.107613	0.0311668
Catenin delta-1	Ctnnd1	0.17934	0.0171043
DNA topoisomerase 1	Top1	-0.256121	0.00125609
Septin-9	Septin9	0.0430421	0.296441
Nuclear pore membrane glycoprotein 210	Nup210	-0.228032	0.0237124
Centromere/kinetochore protein zw10 homolog	Zw10	0.36718	0.00773759
Histone H4	H4f16	-0.127188	0.128376
Serpin B6	Serpinb6	0.478592	0.000916664
Zinc finger CCCH domain-containing protein 11A	Zc3h11a	-0.0882748	0.264616
Aminopeptidase B	Rnpep	-0.0655633	0.132389
Sorting nexin-9	Snx9	-0.0631301	0.205266
Far upstream element-binding protein 1	Fubp1	-0.0924534	0.144748
Coiled-coil domain-containing protein 22	Ccdc22	0.272123	0.00168429
ATP-dependent 6-phosphofructokinase, platelet type	Pfkp	-0.100595	0.14067
Short-chain specific acyl-CoA dehydrogenase, mitochondrial	Acads	-0.00358293	0.943633
Cullin-1	Cul1	0.0961002	0.218291
RNA helicase	Ddx23	-0.267972	0.00302979
Eukaryotic translation initiation factor 3 subunit E	Eif3e	0.0362034	0.502167
Tyrosine-protein phosphatase non-receptor type 23	Ptpn23	0.172233	0.0522524
Sodium/potassium-transporting ATPase subunit alpha-2	Atp1a2	NA	NA
Eukaryotic peptide chain release factor GTP-binding subunit ERF3A	Gspt1	0.0505738	0.430338
Hexokinase-3	Hk3	0.425502	0.000394035
Phospholipase A-2-activating protein	Plaa	0.143434	0.016882
Ras GTPase-activating protein-binding protein 2	G3bp2	0.0512365	0.335881
FACT complex subunit SSRP1	Ssrp1	-0.0628367	0.191683
Zinc phosphodiesterase ELAC protein 2	Elac2	0.119061	0.0269893
Eukaryotic translation initiation factor 2 subunit 2	Eif2s2	0.16417	0.0698943
Dolichyl-diphosphooligosaccharide--protein glycosyltransferase subunit 2	Rpn2	-0.197144	0.00790287
Ubiquitin carboxyl-terminal hydrolase 24	Usp24	0.0594229	0.429944
UDP-N-acetylglucosamine--peptide N-acetylglucosaminyltransferase 110 kDa subunit	Ogt	-0.176674	0.0205544
Carbonic anhydrase 2	Ca2	-0.0835906	0.0708265
Puromycin-sensitive aminopeptidase	Npepps	0.0332022	0.457176
Integrator complex subunit 1	Ints1	0.0676067	0.315857
Pyridoxal-dependent decarboxylase domain-containing protein 1	Pdxdc1	0.105016	0.08532
Ubiquitin-like modifier-activating enzyme ATG7	Atg7	0.172245	0.0145829
Poly(rC)-binding protein 1	Pcbp1	0.0332475	0.464106
Inositol 1,4,5-trisphosphate receptor type 3	Itpr3	0.0158955	0.843267
DNA mismatch repair protein Msh2	Msh2	0.0748859	0.331188
E3 ubiquitin-protein ligase BRE1A	Rnf20	0.352937	0.00168429
Arf-GAP with coiled-coil, ANK repeat and PH domain-containing protein 2	Acap2	0.269677	0.00909426
pre-rRNA 2'-O-ribose RNA methyltransferase FTSJ3	Ftsj3	-0.0284541	0.56962
Integrin alpha-M	Itgam	-0.216293	0.0325314
WD repeat-containing protein 75	Wdr75	-0.155085	0.0321279
Centrosomal protein of 170 kDa	Cep170	0.129284	0.0307179
Glycine amidinotransferase, mitochondrial	Gatm	-0.336426	0.00113054
Ras GTPase-activating protein-binding protein 1	G3bp1	-0.0487791	0.445487
U4/U6.U5 tri-snRNP-associated protein 1	Sart1	0.0979773	0.0978424
Interferon-activable protein 204	Ifi204	-0.659114	0.00245127
Peptidyl-prolyl cis-trans isomerase D	Ppid	0.133667	0.0113347
ATP-dependent RNA helicase DDX24	Ddx24	-0.0977528	0.0483205
Fructose-bisphosphate aldolase C	Aldoc	0.207701	0.0256019
ATP-dependent 6-phosphofructokinase, liver type	Pfkl	0.0229967	0.666951
Apolipoprotein A-I	APOA1	NA	NA
40S ribosomal protein S4, X isoform	Rps4x	-0.20384	0.0154187
14-3-3 protein zeta/delta	Ywhaz	-0.052709	0.56717
Inverted formin-2	Inf2	0.128187	0.0997847
Histidine--tRNA ligase, cytoplasmic	Hars1	0.114147	0.0985686
Eukaryotic initiation factor 4A-III	Eif4a3	-0.0963524	0.0535393
Sorting nexin-1	Snx1	0.187107	0.00276234
Prohibitin	Phb	-0.204993	0.0164452
Signal recognition particle subunit SRP68	Srp68	0.0973885	0.138411
Schlafen family member 5	Slfn5	-0.636682	0.000551028
Beta-glucuronidase	Gusb	0.0161421	0.765419
BMS1 homolog, ribosome assembly protein (Yeast)	Bms1	-0.0380629	0.352718
RNA-binding protein 39	Rbm39	-0.0203666	0.673162
NADH dehydrogenase [ubiquinone] flavoprotein 1, mitochondrial	Ndufv1	-0.193802	0.0329686
MORC family CW-type zinc finger protein 3	Morc3	-0.197805	0.00577028
Band 4.1-like protein 2	Epb41l2	0.108512	0.102564
Inosine-5'-monophosphate dehydrogenase 2	Impdh2	-0.126729	0.0311638
Aldehyde dehydrogenase, mitochondrial	Aldh2	-0.00679269	0.909928
Nucleobindin-1	Nucb1	-0.0135822	0.821932
Protein LYRIC	Mtdh	-0.0936645	0.0427479
Eukaryotic peptide chain release factor subunit 1	Etf1	-0.0580268	0.400948
Protein phosphatase 1 regulatory subunit 12A	Ppp1r12a	0.264358	0.00694061
Phosphoinositide 3-kinase adapter protein 1	Pik3ap1	0.117283	0.0210648
Apoptosis inhibitor 5	Api5	0.0122126	0.847714
Annexin A6	Anxa6	0.194187	0.037903
Macrophage-capping protein	Capg	0.0560339	0.489899
Serine/threonine-protein phosphatase 2A catalytic subunit alpha isoform	Ppp2ca	0.182147	0.00667134
Phosphatidylinositol 3,4,5-trisphosphate 5-phosphatase 2	Inppl1	-0.10837	0.0549462
Elongator complex protein 1	Elp1	0.157966	0.0160746
Histone acetyltransferase type B catalytic subunit	Hat1	0.105633	0.172652
GDP-mannose 4,6 dehydratase	Gmds	0.078229	0.264939
DnaJ homolog subfamily C member 2	Dnajc2	0.21144	0.0157637
Dynamin-like 120 kDa protein, mitochondrial	Opa1	-0.269558	0.00524564
T-complex protein 1 subunit zeta	Cct6a	0.0390173	0.358672
Vacuolar protein sorting-associated protein 11 homolog	Vps11	0.0864569	0.155056
Tuftelin-interacting protein 11	Tfip11	0.173059	0.048916
Transgelin-2	Tagln2	0.214492	0.124242
DNA-directed RNA polymerase I subunit RPA1	Polr1a	-0.225634	0.0183533
Aminopeptidase N	Anpep	-0.0989541	0.101822
Hsp90 co-chaperone Cdc37	Cdc37	0.0827316	0.115069
Chloride intracellular channel protein 1	Clic1	0.00484035	0.925079
Annexin A4	Anxa4	0.139633	0.0228846
Aspartyl/asparaginyl beta-hydroxylase	Asph	-0.444203	0.000981881
NAD-dependent malic enzyme, mitochondrial	Me2	-0.278851	0.00375038
Serine-threonine kinase receptor-associated protein	Strap	0.15397	0.00972841
Phosphatidylinositol 4-phosphate 3-kinase C2 domain-containing subunit alpha	Pik3c2a	-0.234253	0.0173242
Actin-like protein 6A	Actl6a	0.0279846	0.627855
Dynamin-1-like protein	Dnm1l	0.214794	0.0234604
Isocitrate dehydrogenase [NADP], mitochondrial	Idh2	-0.0677737	0.155192
Nuclear pore complex protein Nup160	Nup160	-0.142674	0.128855
Phenylalanine--tRNA ligase alpha subunit	Farsa	0.0890523	0.142359
SAFB-like transcription modulator	Sltm	-0.111422	0.056351
Gasdermin-D	Gsdmd	-0.0465503	0.459426
Interferon-induced protein with tetratricopeptide repeats 3	Ifit3	-0.872136	0.000477126
Heterogeneous nuclear ribonucleoprotein Q	Syncrip	-0.0515457	0.198511
V-type proton ATPase subunit H	Atp6v1h	0.533849	0.000277419
U4/U6 small nuclear ribonucleoprotein Prp31	Prpf31	0.01911	0.772223
Protein Niban 1	Niban1	0.12746	0.0590603
DNA topoisomerase 2-beta	Top2b	-0.0410936	0.529265
Aspartate aminotransferase, cytoplasmic	Got1	0.082763	0.0836114
SUN domain-containing protein 2	Sun2	-0.0243826	0.773073
E1 ubiquitin-activating enzyme	Uba7	-0.343666	0.00331101
Poly(U)-binding-splicing factor PUF60	Puf60	-0.158607	0.0355455
Rabankyrin-5	Ankfy1	-0.0456308	0.380067
Cytoskeleton-associated protein 4	Ckap4	-0.0204448	0.66757
ATP-dependent RNA helicase DHX30	Dhx30	0.00066366	0.990359
Neutrophil cytosol factor 2	Ncf2	0.333496	0.0017905
Serine/threonine-protein phosphatase PP1-alpha catalytic subunit	Ppp1ca	0.0678169	0.204031
ADP-ribosylation factor 1	Arf1	-0.0509724	0.535101
D-glutamate cyclase, mitochondrial	Dglucy	0.231312	0.010992
Sorting nexin-2	Snx2	0.00636831	0.924611
60S ribosomal protein L7	Rpl7	-0.234523	0.0223445
WD repeat domain 36	Wdr36	-0.146526	0.0673299
Nucleoporin 153	Nup153	0.082447	0.215102
DNA polymerase alpha catalytic subunit	Pola1	0.0136095	0.802452
CLIP-associating protein 2	Clasp2	0.152289	0.0250856
Protein NDRG2	Ndrg2	0.264518	0.00247107
Pinin	Pnn	-0.107022	0.0901223
Transportin-1	Tnpo1	0.185765	0.00773397
Nuclear pore complex protein Nup133	Nup133	-0.158481	0.0951913
Pre-mRNA-processing factor 40 homolog A	Prpf40a	-0.118639	0.0307098
Nucleolar pre-ribosomal-associated protein 1	Urb1	-0.253733	0.00975307
RNA-binding protein 28	Rbm28	-0.162423	0.0249157
Pre-mRNA-processing factor 19	Prpf19	-0.159965	0.126187
Mitochondrial-processing peptidase subunit alpha	Pmpca	-0.310725	0.00252055
Aldo-keto reductase family 1 member A1	Akr1a1	0.313312	0.00302979
Tryptophan--tRNA ligase, cytoplasmic	Wars1	0.226118	0.0297453
Poly(rC)-binding protein 2	Pcbp2	0.11241	0.0593836
Rab3 GTPase-activating protein non-catalytic subunit	Rab3gap2	0.127954	0.0583628
Beta-catenin-like protein 1	Ctnnbl1	0.0504507	0.435132
H/ACA ribonucleoprotein complex subunit DKC1	Dkc1	-0.281102	0.00801112
Calcium-binding mitochondrial carrier protein Aralar2	Slc25a13	-0.290864	0.00118874
Dynamin-2	Dnm2	0.299473	0.00459488
Proteasome activator complex subunit 1	Psme1	-0.0836516	0.145584
Fatty acid-binding protein 5	Fabp5	-0.230276	0.00519835
Adenylosuccinate lyase	Adsl	-0.0111195	0.901198
E3 ubiquitin-protein ligase UHRF1	Uhrf1	-0.195251	0.0175558
EH domain-containing protein 1	Ehd1	-0.272689	0.00383666
Annexin A11	Anxa11	0.0138724	0.808822
Adenylosuccinate synthetase isozyme 2	Adss2	0.148353	0.0187113
Spermidine synthase	Srm	-0.106247	0.272677
Sphingosine-1-phosphate lyase 1	Sgpl1	-0.0611578	0.208436
Interferon-induced helicase C domain-containing protein 1	Ifih1	-0.465965	0.00109211
Cell cycle and apoptosis regulator protein 2	Ccar2	-0.196027	0.0065078
Heat shock 70 kDa protein 14	Hspa14	0.11	0.0712632
Oxygen-dependent coproporphyrinogen-III oxidase, mitochondrial	Cpox	-0.243479	0.00736997
Integrin alpha-4	Itga4	-0.266508	0.00303903
Interferon-induced protein 44	Ifi44	-0.364345	0.00413123
Dedicator of cytokinesis protein 8	Dock8	0.111951	0.130104
Phosphatidylinositol transfer protein alpha isoform	Pitpna	0.244778	0.0019053
ATP-dependent RNA helicase DDX18	Ddx18	-0.17507	0.0284012
3-ketoacyl-CoA thiolase A, peroxisomal	Acaa1a	-0.101921	0.0753388
NADP-dependent malic enzyme	Me1	0.229245	0.00490185
WD repeat and HMG-box DNA-binding protein 1	Wdhd1	-0.0298785	0.777814
Vasodilator-stimulated phosphoprotein	Vasp	-0.0175326	0.743362
Wings apart-like protein homolog	Wapl	0.277017	0.0116375
WD repeat- and FYVE domain-containing protein 4	Wdfy4	0.149173	0.0279089
Prohibitin-2	Phb2	-0.289478	0.00243505
Coronin-1A	Coro1a	-0.0692805	0.254076
Beta-hexosaminidase subunit beta	Hexb	0.101423	0.0241819
Pyruvate dehydrogenase E1 component subunit alpha, somatic form, mitochondrial	Pdha1	-0.391549	0.000378724
Guanine nucleotide-binding protein G(I)/G(S)/G(T) subunit beta-2	Gnb2	-0.112644	0.035658
Caprin-1	Caprin1	-0.111967	0.239918
Voltage-dependent anion-selective channel protein 2	Vdac2	-0.295268	0.000782548
Histone-binding protein RBBP4	Rbbp4	-0.0722208	0.250971
U3 small nucleolar RNA-associated protein 14 homolog A	Utp14a	-0.0710644	0.26091
Phosphate carrier protein, mitochondrial	Slc25a3	-0.295273	0.102126
RNA-splicing ligase RtcB homolog	Rtcb	0.0512265	0.329448
Actin-related protein 2/3 complex subunit 2	Arpc2	-0.0491428	0.584162
Endoplasmic reticulum transmembrane helix translocase	Atp13a1	-0.0787012	0.0679842
RNA-binding protein 25	Rbm25	-0.0706634	0.281759
F-actin-capping protein subunit beta	Capzb	-0.002614	0.972751
Nesprin-3	Syne3	-0.0827642	0.289993
C-Jun-amino-terminal kinase-interacting protein 4	Spag9	0.140114	0.0326503
CD166 antigen	Alcam	-0.374597	0.00123698
Drebrin-like protein	Dbnl	0.0131517	0.843643
Activator of 90 kDa heat shock protein ATPase homolog 1	Ahsa1	0.256673	0.00243505
Deoxynucleotidyltransferase terminal-interacting protein 2	Dnttip2	0.189357	0.0141446
AT-rich interactive domain-containing protein 1A	Arid1a	-0.0783059	0.305693
Ribonucleoside-diphosphate reductase large subunit	Rrm1	0.0958074	0.10726
Purine nucleoside phosphorylase	Pnp	-0.314502	0.00132677
TP53-binding protein 1	Tp53bp1	-0.133442	0.0475675
Echinoderm microtubule-associated protein-like 4	Eml4	-0.0199352	0.697497
Leucine-rich repeat-containing protein 40	Lrrc40	0.160573	0.0196718
Probable ATP-dependent RNA helicase DDX56	Ddx56	0.0493091	0.352718
Inositol-3-phosphate synthase 1	Isyna1	0.167044	0.160218
High mobility group nucleosome-binding domain-containing protein 5	Hmgn5	-0.0217871	0.81528
SUMO-activating enzyme subunit 1	Sae1	0.0768312	0.142359
AP-3 complex subunit beta-1	Ap3b1	0.165419	0.0162542
Uridine 5'-monophosphate synthase	Umps	-0.0104743	0.898784
Nicotinamide phosphoribosyltransferase	Nampt	-0.182863	0.00645685
Glutaredoxin-3	Glrx3	-0.018367	0.746539
Apoptosis-inducing factor 1, mitochondrial	Aifm1	-0.178574	0.013837
Activity-dependent neuroprotector homeobox protein	Adnp	-0.140741	0.0687657
E3 ubiquitin/ISG15 ligase TRIM25	Trim25	0.392869	0.000519371
Serine/threonine-protein kinase VRK1	Vrk1	0.0692685	0.25824
Integrator complex subunit 13	IntS13	0.0246157	0.673745
Nucleolar GTP-binding protein 2	Gnl2	0.0657663	0.202955
Pre-mRNA-splicing factor SYF1	Xab2	0.0479709	0.472354
Adenylate kinase 2, mitochondrial	Ak2	-0.338225	0.000916664
Ubiquitin-protein ligase E3A	Ube3a	-0.28645	0.0116216
Serine/threonine-protein kinase WNK1	Wnk1	0.151167	0.0510171
GPI transamidase component PIG-S	Pigs	-0.211713	0.00456459
(E3-independent) E2 ubiquitin-conjugating enzyme UBE2O	Ube2o	0.523236	0.000981881
Splicing factor 3A subunit 3	Sf3a3	-0.215949	0.00785348
Cap-specific mRNA (nucleoside-2'-O-)-methyltransferase 1	Cmtr1	0.0523791	0.557009
Integrin beta-2	Itgb2	0.090892	0.204459
Alpha-taxilin	Txlna	0.176174	0.0255221
Telomere-associated protein RIF1	Rif1	-0.17597	0.038374
Nuclear RNA export factor 7	Nxf7	0.303567	0.00508092
Cleavage and polyadenylation specificity factor subunit 2	Cpsf2	-0.112667	0.044711
FK506-binding protein 15	Fkbp15	0.141939	0.0259045
Replication protein A 70 kDa DNA-binding subunit	Rpa1	0.0983085	0.148484
Phosphoglycerate mutase 1	Pgam1	0.104592	0.273295
Ubiquitin conjugation factor E4 B	Ube4b	0.05389	0.399143
High mobility group protein B1	Hmgb1	0.0390361	0.592361
Chromodomain-helicase-DNA-binding protein 8	Chd8	0.274108	0.00597541
Methionine aminopeptidase 2	Metap2	0.437092	0.00288728
Signal recognition particle 54 kDa protein	Srp54	0.448839	0.00196263
WASH complex subunit 4	Washc4	-0.0497969	0.331706
V-type proton ATPase subunit a	Tcirg1	-0.0255472	0.570381
Epidermal growth factor receptor substrate 15	Eps15	0.141187	0.0650037
Anillin	Anln	0.519143	0.0165078
Protein ERGIC-53	Lman1	-0.0543841	0.368024
GRIP and coiled-coil domain-containing protein 2	Gcc2	0.160511	0.0881081
4-alpha-glucanotransferase	Agl	0.3593	0.00236899
Lamin-B2	Lmnb2	-0.173593	0.0510746
Procollagen-lysine,2-oxoglutarate 5-dioxygenase 1	Plod1	-0.293681	0.00317225
Cohesin subunit SA-2	Stag2	-0.0564423	0.45299
Acetyl-CoA acetyltransferase, mitochondrial	Acat1	-0.124073	0.0257453
Chromosome-associated kinesin KIF4	Kif4	0.285924	0.0130668
60S ribosomal protein L10a	Rpl10a	-0.243364	0.00458142
Lymphocyte-specific helicase	Hells	0.121492	0.145766
Protein phosphatase 1G	Ppm1g	0.109764	0.239027
Plasminogen activator inhibitor 1 RNA-binding protein	Serbp1	0.00169066	0.982162
Protein S100-A10	S100a10	-0.0484166	0.712222
Cyclin-dependent kinase 11B	Cdk11b	-0.0587045	0.308476
Tyrosine-protein kinase Lyn	Lyn	-0.494575	0.000545657
Cullin-4B	Cul4b	-0.0529777	0.368538
Oxysterol-binding protein-related protein 8	Osbpl8	0.0396432	0.302806
Alpha-2-HS-glycoprotein	AHSG	NA	NA
Cathepsin D	Ctsd	-0.0861516	0.113619
Ribosomal protein S6 kinase alpha-1	Rps6ka1	0.328818	0.00120039
Nucleolar transcription factor 1	Ubtf	-0.069855	0.34721
Peroxiredoxin-1	Prdx1	0.234507	0.00516744
Tyrosine-protein kinase CSK	Csk	0.112678	0.104074
Hematopoietic lineage cell-specific protein	Hcls1	0.0457703	0.36608
Very long-chain specific acyl-CoA dehydrogenase, mitochondrial	Acadvl	0.150927	0.0155578
Proteasome activator complex subunit 3	Psme3	-0.00277652	0.959356
Rho-associated protein kinase 2	Rock2	0.0765539	0.112083
Neutrophil cytosol factor 4	Ncf4	0.34176	0.00102971
Vacuolar protein sorting-associated protein 13A	Vps13a	0.00750232	0.927316
Shootin-1	Shtn1	0.256736	0.00245733
Nucleolar protein 6	Nol6	-0.195271	0.0436887
Ubiquitin-associated protein 2	Ubap2	-0.0369683	0.510788
Tubulin beta-6 chain	Tubb6	0.0532827	0.375299
Stomatin-like protein 2, mitochondrial	Stoml2	-0.23911	0.00952388
Cyclin-G-associated kinase	Gak	0.246054	0.00471143
Putative RNA-binding protein Luc7-like 1	Luc7l	0.112499	0.0880773
Glycine--tRNA ligase	Gars1	0.0683608	0.249316
Ubiquitin carboxyl-terminal hydrolase isozyme L5	Uchl5	-0.070489	0.256241
Targeting protein for Xklp2	Tpx2	0.378135	0.00869924
Rho guanine nucleotide exchange factor 10-like protein	Arhgef10l	0.180718	0.00901591
Calpain-2 catalytic subunit	Capn2	0.299791	0.00184401
Lysosomal acid glucosylceramidase	Gba	-0.136751	0.0325946
Alpha-mannosidase 2	Man2a1	-0.263429	0.00486594
Ras-related protein Rab-7a	Rab7a	-0.114829	0.0419477
14-3-3 protein eta	Ywhah	0.0501541	0.351625
Phosphatidylethanolamine-binding protein 1	Pebp1	0.105731	0.044457
Disabled homolog 2	Dab2	-0.1665	0.0332166
Nuclear fragile X mental retardation-interacting protein 2	Nufip2	-0.0349422	0.590581
Nischarin	Nisch	0.166289	0.0269832
Sp110 nuclear body protein	Sp110	-0.565171	0.000446237
Calcium homeostasis endoplasmic reticulum protein	Cherp	-0.129605	0.0167309
Importin-4	Ipo4	-0.0234473	0.733365
Cleavage and polyadenylation specificity factor subunit 3	Cpsf3	-0.00527754	0.9352
Caspase-8	Casp8	-0.129701	0.0354538
Hypoxanthine-guanine phosphoribosyltransferase	Hprt1	0.264345	0.00421703
Keratin, type II cytoskeletal 1	KRT1	NA	NA
Tubulin--tyrosine ligase-like protein 12	Ttll12	0.1281	0.120015
Polyadenylate-binding protein	Pabpc4	-0.0507304	0.349599
Serine/threonine-protein phosphatase 2A 65 kDa regulatory subunit A beta isoform	Ppp2r1b	0.222414	0.0677051
RNA helicase	Dhx38	0.118731	0.0526299
RNA-binding protein 14	Rbm14	-0.0347986	0.653749
E3 UFM1-protein ligase 1	Ufl1	-0.113403	0.0580271
ATP-dependent RNA helicase DDX39A	Ddx39a	-0.21868	0.0582972
Cytosolic acyl coenzyme A thioester hydrolase	Acot7	0.0818099	0.0553764
U4/U6 small nuclear ribonucleoprotein Prp4	Prpf4	-0.17581	0.0167393
V-type proton ATPase subunit C 1	Atp6v1c1	0.202715	0.03829
Protein transport protein Sec16A	Sec16a	0.0904964	0.151974
Sortilin-related receptor	Sorl1	-0.96023	0.000537904
40S ribosomal protein S6	Rps6	-0.190221	0.0512036
La-related protein 7	Larp7	-0.175771	0.00869924
E3 ubiquitin-protein ligase BRE1B	Rnf40	0.310789	0.00236899
Phosphatidylinositol 3,4,5-trisphosphate-dependent Rac exchanger 1 protein	Prex1	0.328601	0.00909298
CLIP-associating protein 1	Clasp1	0.428155	0.00219453
Formin-binding protein 1-like	Fnbp1l	-0.053602	0.471085
Phenylalanine--tRNA ligase beta subunit	Farsb	0.0804032	0.0695154
Inhibitor of nuclear factor kappa-B kinase subunit beta	Ikbkb	0.0369283	0.62642
40S ribosomal protein SA	Rpsa	-0.22219	0.00470082
Probable ATP-dependent RNA helicase DDX6	Ddx6	-0.0472079	0.626312
Serine/threonine-protein phosphatase 5	Ppp5c	0.197257	0.00629812
Rho GDP-dissociation inhibitor 2	Arhgdib	0.181628	0.0231699
Tropomyosin alpha-4 chain	Tpm4	0.0217731	0.631088
WD repeat-containing protein 3	Wdr3	-0.0808417	0.113393
Proteasome subunit beta type-8	Psmb8	-0.551859	0.00031759
Actin-related protein 2	Actr2	0.0542948	0.363311
Cytosolic purine 5'-nucleotidase	Nt5c2	0.168237	0.0500004
DmX-like protein 1	Dmxl1	0.152056	0.0588519
Atlastin-3	Atl3	-0.0991895	0.104158
Nuclear RNA export factor 1	Nxf1	-0.0156513	0.760473
UMP-CMP kinase	Cmpk1	0.165705	0.0190465
Cofilin-1	Cfl1	0.122713	0.138143
Ornithine aminotransferase, mitochondrial	Oat	-0.381955	0.000628682
Elongation factor 1-delta	Eef1d	0.0269834	0.736699
40S ribosomal protein S3a	Rps3a	-0.277887	0.0672773
NADH-cytochrome b5 reductase 3	Cyb5r3	-0.0535065	0.303334
Acyl-coenzyme A thioesterase 9, mitochondrial	Acot9	-0.129901	0.0299594
V-type proton ATPase subunit E 1	Atp6v1e1	0.0710816	0.388841
Rho GTPase-activating protein 1	Arhgap1	-0.0362803	0.557302
Fragile X mental retardation syndrome-related protein 1	Fxr1	0.284295	0.00695863
CTTNBP2 N-terminal-like protein	Cttnbp2nl	0.230137	0.00999517
Ribosomal biogenesis protein LAS1L	Las1l	-0.00997583	0.841041
Kinesin-like protein KIF11	Kif11	0.860306	0.000653123
Formin-binding protein 1	Fnbp1	0.0643707	0.285048
Deubiquitinating protein VCPIP1	Vcpip1	0.119329	0.0756479
Thioredoxin-like protein 1	Txnl1	0.374047	0.00157157
RAS p21 protein activator 1	Rasa1	-0.3212	0.00842195
Phosphatidylinositol-binding clathrin assembly protein	Picalm	0.00572496	0.9362
Interferon-induced, double-stranded RNA-activated protein kinase	Eif2ak2	-0.195193	0.0123546
ATP-dependent translocase ABCB1	Abcb1b	-0.200763	0.018685
Testin	Tes	0.158372	0.0864262
Serine/threonine-protein phosphatase 2A 56 kDa regulatory subunit	Ppp2r5d	0.235166	0.0244076
Integrator complex subunit 7	Ints7	0.0088157	0.921535
Solute carrier family 4 (anion exchanger), member 1, adaptor protein	Slc4a1ap	0.116373	0.167651
Dihydrolipoyl dehydrogenase, mitochondrial	Dld	-0.179891	0.0197067
DNA-directed RNA polymerase I subunit RPA2	Polr1b	-0.292826	0.00269386
Beta-adrenergic receptor kinase 1	Grk2	0.0269255	0.580293
Signal transducer and activator of transcription 3	Stat3	-0.0584808	0.414658
Transcriptional regulator ATRX	Atrx	0.0370484	0.603798
Transformation/transcription domain-associated protein	Trrap	0.141615	0.14766
Nuclear pore complex protein Nup54	Nup54	-0.0773807	0.388014
Catenin alpha-1	Ctnna1	0.955096	0.000298972
Phosphatidylinositol 4-kinase alpha	Pi4ka	0.418031	0.00325189
Leucine-rich repeat flightless-interacting protein 1	Lrrfip1	0.0959895	0.27113
RNA helicase aquarius	Aqr	0.027146	0.695078
Protein NDRG1	Ndrg1	0.118475	0.0845879
RNA polymerase II-associated factor 1 homolog	Paf1	-0.0328622	0.666183
Heme oxygenase 2	Hmox2	-0.300463	0.000707285
26S proteasome non-ATPase regulatory subunit 7	Psmd7	0.145549	0.194127
Recombining binding protein suppressor of hairless	Rbpj	-0.292508	0.00463193
Developmentally-regulated GTP-binding protein 1	Drg1	0.0908463	0.0955333
Aldose reductase-related protein 2	Akr1b8	0.0526861	0.559848
40S ribosomal protein S15	Rps15	-0.338622	0.0509281
ELAV-like protein 1	Elavl1	-0.122478	0.0679679
Neutrophil cytosol factor 1	Ncf1	0.366873	0.000519371
S-adenosylmethionine synthase isoform type-2	Mat2a	-0.0240041	0.659673
Ubiquitin carboxyl-terminal hydrolase 19	Usp19	0.54653	0.000531489
Double-strand-break repair protein rad21 homolog	Rad21	-0.12736	0.0378899
Phosphoenolpyruvate carboxykinase [GTP], mitochondrial	Pck2	-0.135103	0.013837
Transmembrane protein 214	Tmem214	-0.221147	0.0118929
Serine/threonine-protein kinase TAO3	Taok3	0.118185	0.172694
Ras-related protein Rab-14	Rab14	-0.12004	0.0387734
Heterogeneous nuclear ribonucleoprotein L-like	Hnrnpll	-0.0266015	0.616588
Probable 28S rRNA (cytosine-C(5))-methyltransferase	Nop2	-0.281744	0.0140402
Cullin-5	Cul5	0.132065	0.0706145
Isocitrate dehydrogenase [NAD] subunit alpha, mitochondrial	Idh3a	-0.235198	0.0145829
Actin-related protein 2/3 complex subunit 1B	Arpc1b	0.028293	0.494657
Eukaryotic translation initiation factor 2 subunit 3, Y-linked	Eif2s3y	0.0819767	0.112494
Nucleolar and coiled-body phosphoprotein 1	Nolc1	-0.308637	0.00459488
Glucosidase 2 subunit beta	Prkcsh	-0.0452152	0.308663
Macrophage migration inhibitory factor	Mif	-0.119413	0.053006
Profilin-1	Pfn1	-0.168858	0.28676
Sodium/potassium-transporting ATPase subunit beta-3	Atp1b3	-0.257891	0.00276234
Transcription activator BRG1	Smarca4	0.0431849	0.413806
Girdin	Ccdc88a	0.301717	0.0151358
Sterol O-acyltransferase 1	Soat1	-0.160374	0.0319547
Isoleucine--tRNA ligase, mitochondrial	Iars2	-0.307945	0.00219453
RUN and FYVE domain-containing protein 1	Rufy1	0.134238	0.0555483
Gem-associated protein 5	Gemin5	-0.0533723	0.48098
Nuclear pore complex protein Nup88	Nup88	-0.0639806	0.148484
Importin-9	Ipo9	-0.0192037	0.731953
Vacuolar protein sorting-associated protein 16 homolog	Vps16	0.171966	0.0132276
Protein disulfide-isomerase A6	Pdia6	-0.166785	0.0568486
Plastin-3	Pls3	0.214601	0.0274477
Succinate dehydrogenase [ubiquinone] iron-sulfur subunit, mitochondrial	Sdhb	-0.0780463	0.246727
ATP synthase subunit O, mitochondrial	Atp5po	-0.253034	0.00332437
AMP deaminase 2	Ampd2	-0.0732328	0.219761
Unconventional myosin-Ic	Myo1c	0.0864535	0.200936
Eukaryotic translation initiation factor 2B, subunit 3	Eif2b3	0.081439	0.141051
Calpain-1 catalytic subunit	Capn1	0.158281	0.0190483
Ataxin-2-like protein	Atxn2l	-0.0157442	0.813272
3-ketoacyl-CoA thiolase, mitochondrial	Acaa2	-0.0770286	0.251743
Alkyldihydroxyacetonephosphate synthase, peroxisomal	Agps	-0.300124	0.00108298
Glycogen phosphorylase, brain form	Pygb	0.103491	0.0777219
Dedicator of cytokinesis protein 7	Dock7	0.201245	0.0222869
Sorting nexin-4	Snx4	0.287656	0.00177415
Histone deacetylase 1	Hdac1	-0.111284	0.145409
rRNA 2'-O-methyltransferase fibrillarin	Fbl	-0.250941	0.00245127
Heterogeneous nuclear ribonucleoproteins C1/C2	Hnrnpc	-0.272307	0.064998
Serine/threonine-protein kinase PAK 1	Pak1	0.271766	0.00736997
Kinesin-like protein KIF2A	Kif2a	0.258024	0.00543151
Alpha-1-antiproteinase	SERPINA1	NA	NA
Ubiquitin-conjugating enzyme E2 K	Ube2k	0.123395	0.0268529
Nucleobindin-2	Nucb2	-0.207589	0.0164681
Multifunctional procollagen lysine hydroxylase and glycosyltransferase LH3	Plod3	-0.287449	0.00633084
Mitotic spindle assembly checkpoint protein MAD1	Mad1l1	0.108577	0.0716056
B-TFIID TATA-box-binding protein-associated factor 1	Btaf1	-0.0419721	0.560671
Serine/threonine-protein phosphatase 4 regulatory subunit 2	Ppp4r2	0.00889987	0.910809
Sister chromatid cohesion protein PDS5 homolog B	Pds5b	-0.131157	0.238374
WASH complex subunit 2	Washc2	0.412285	0.000959362
CYFIP-related Rac1 interactor B	Cyrib	0.0331618	0.540908
Squamous cell carcinoma antigen recognized by T-cells 3	Sart3	-0.165788	0.0916929
Non-SMC condensin I complex, subunit G	Ncapg	0.121158	0.313798
Bromodomain adjacent to zinc finger domain protein 1A	Baz1a	-0.271513	0.00695939
Nipped-B-like protein	Nipbl	-0.051983	0.598384
Serine/threonine-protein phosphatase 2A 55 kDa regulatory subunit B alpha isoform	Ppp2r2a	0.0373308	0.411138
Kinesin light chain 1	Klc1	0.261178	0.0025914
DNA ligase 3	Lig3	0.14054	0.0500809
Heterogeneous nuclear ribonucleoprotein F	Hnrnpf	-0.219886	0.0351573
Complement C3	C3	NA	NA
Poly(A) polymerase alpha	Papola	0.0898267	0.159697
tRNA (uracil-5-)-methyltransferase homolog A	Trmt2a	0.0738736	0.241628
Exportin-T	Xpot	0.118423	0.0534099
Probable ATP-dependent RNA helicase DDX20	Ddx20	0.0981127	0.0731903
Maestro heat-like repeat family member 1	Mroh1	0.28713	0.00516252
60S ribosomal protein L6	Rpl6	-0.27703	0.0121139
SLIT-ROBO Rho GTPase-activating protein 2	Srgap2	0.163916	0.0172284
Keratin, type I cytoskeletal 9	KRT9	NA	NA
55 kDa erythrocyte membrane protein	Mpp1	0.582748	0.00059515
Interferon-induced protein with tetratricopeptide repeats 1	Ifit1	-0.49398	0.000611273
Protein argonaute-2	Ago2	0.0475432	0.543254
NAD(P) transhydrogenase, mitochondrial	Nnt	-0.0762791	0.321822
Protein SDA1 homolog	Sdad1	-0.264387	0.0149431
Guanine nucleotide-binding protein G(i) subunit alpha-2	Gnai2	-0.100882	0.243864
GEM-interacting protein	Gmip	0.0208788	0.74398
Eukaryotic translation initiation factor 2A	Eif2a	-0.0234666	0.581657
ATP-dependent RNA helicase DDX54	Ddx54	-0.200626	0.00773397
Dipeptidyl peptidase 3	Dpp3	0.0734018	0.190086
TBC1 domain family member 15	Tbc1d15	0.114672	0.040238
Toll-like receptor 7	Tlr7	-0.336581	0.0121139
CTP synthase 1	Ctps1	0.0547283	0.168984
Nuclear pore glycoprotein p62	Nup62	0.00750576	0.829572
Fibronectin type-III domain-containing protein 3A	Fndc3a	-0.446523	0.000772473
Mitochondrial proton/calcium exchanger protein	Letm1	-0.155089	0.0104164
Keratin, type II cytoskeletal 2 epidermal	KRT2	NA	NA
THUMP domain-containing protein 1	Thumpd1	0.144558	0.0761308
Calumenin	Calu	-0.0866213	0.108186
Dolichyl-diphosphooligosaccharide--protein glycosyltransferase 48 kDa subunit	Ddost	-0.253487	0.0123546
Bystin	Bysl	-0.00909023	0.893248
Striatin	Strn	-0.0486399	0.46967
Proteasome subunit alpha type-2	Psma2	-0.380611	0.00342607
2-oxoisovalerate dehydrogenase subunit alpha, mitochondrial	Bckdha	-0.0969478	0.0705994
Endoplasmic reticulum resident protein 29	Erp29	-0.181804	0.0215686
Synaptic vesicle membrane protein VAT-1 homolog	Vat1	0.175325	0.120514
Sphingomyelin phosphodiesterase 4	Smpd4	0.0802862	0.195388
Ribosomal L1 domain-containing protein 1	Rsl1d1	-0.164873	0.0288784
Integrator complex subunit 4	Ints4	-0.0538956	0.432074
Nucleolar protein 14	Nop14	0.143709	0.0740057
RNA-binding protein 5	Rbm5	0.107358	0.18097
Deoxyribose-phosphate aldolase	Dera	0.172534	0.0210951
Melanoma inhibitory activity protein 2	Mia2	-0.0293429	0.632719
Ras-related protein Rab-31	Rab31	-0.41023	0.000916664
Sialic acid synthase	Nans	0.00330906	0.943633
Cytochrome b-c1 complex subunit 1, mitochondrial	Uqcrc1	-0.251762	0.00633898
Mitochondrial import receptor subunit TOM70	Tomm70	-0.346517	0.00113054
Pyruvate dehydrogenase E1 component subunit beta, mitochondrial	Pdhb	-0.215	0.00709972
Sorting nexin-5	Snx5	0.054182	0.392323
AP-2 complex subunit beta	Ap2b1	-0.110748	0.0676261
Pleckstrin	Plek	-0.0853144	0.153705
Developmentally-regulated GTP-binding protein 2	Drg2	0.109309	0.14016
Unconventional myosin-IXb	Myo9b	0.0980826	0.160316
Vacuolar protein sorting-associated protein 29	Vps29	0.20053	0.0259114
RNA-binding motif protein, X chromosome	Rbmx	-0.260212	0.0822047
Proteasome subunit alpha type-5	Psma5	-0.0411348	0.439352
FYN-binding protein 1	Fyb1	-0.0385653	0.345293
60S ribosomal protein L7a	Rpl7a	-0.22435	0.00427515
Xaa-Pro dipeptidase	Pepd	0.261144	0.00433109
Elongation factor-like GTPase 1	Efl1	0.00680092	0.928977
AFG3-like protein 2	Afg3l2	-0.116395	0.0417061
Vacuolar protein sorting-associated protein 18 homolog	Vps18	0.277615	0.00889408
Glyoxalase domain-containing protein 4	Glod4	0.192852	0.00401329
Inorganic pyrophosphatase	Ppa1	-0.0802239	0.137013
Multifunctional protein ADE2	Paics	0.126681	0.01079
Mitotic checkpoint protein BUB3	Bub3	0.103983	0.222601
COP9 signalosome complex subunit 4	Cops4	0.100747	0.0565352
Phosphatidylinositol transfer protein beta isoform	Pitpnb	0.140735	0.0127194
Protein misato homolog 1	Msto1	0.0862194	0.132851
Transportin-3	Tnpo3	0.00736726	0.90503
Tubulin-specific chaperone D	Tbcd	0.182247	0.018979
Complex I assembly factor ACAD9, mitochondrial	Acad9	-0.231778	0.0207083
Eukaryotic translation initiation factor 3 subunit H	Eif3h	-0.0912861	0.365464
39S ribosomal protein L37, mitochondrial	Mrpl37	-0.257727	0.00997789
Eukaryotic translation initiation factor 3 subunit M	Eif3m	0.00249565	0.972957
5'-3' exoribonuclease 2	Xrn2	-0.185936	0.00471143
Protein Red	Ik	0.323315	0.0063318
Proto-oncogene vav	Vav1	0.046341	0.30752
Tyrosine-protein kinase SYK	Syk	0.356364	0.00097664
Nuclear export mediator factor Nemf	Nemf	0.131586	0.10168
Serine/threonine-protein kinase Nek9	Nek9	0.272488	0.00302979
Leucine zipper protein 1	Luzp1	0.0784197	0.192973
Core histone macro-H2A.1	Macroh2a1	-0.138706	0.0603131
Mitochondrial import inner membrane translocase subunit TIM44	Timm44	-0.263969	0.00312029
Sterol carrier protein 2	Scp2	-0.129462	0.0354653
AP-2 complex subunit mu	Ap2m1	0.11137	0.101972
Ubiquitin-associated protein 2-like	Ubap2l	0.17871	0.150466
Transcription elongation factor A protein 1	Tcea1	0.286166	0.0138994
Vacuolar protein sorting-associated protein 4B	Vps4b	0.315285	0.00354218
Ubiquitin recognition factor in ER-associated degradation protein 1	Ufd1	0.688576	0.000308225
Vacuolar protein sorting-associated protein 41 homolog	Vps41	0.180791	0.0206641
E3 ubiquitin-protein ligase listerin	Ltn1	0.0719766	0.238562
Tight junction protein ZO-2	Tjp2	0.220248	0.0236191
Tyrosine-protein kinase BTK	Btk	0.244916	0.0301868
ATP-dependent RNA helicase DDX19A;RNA helicase	Ddx19a;Ddx19b	-0.00417469	0.930574
Transmembrane glycoprotein NMB	Gpnmb	0.574231	0.00169589
N-acetylneuraminate lyase	Npl	0.00693879	0.916726
[Protein ADP-ribosylarginine] hydrolase	Adprh	0.0888045	0.161076
COP9 signalosome complex subunit 2	Cops2	0.203936	0.00868965
RNA-binding protein 15	Rbm15	-0.18532	0.00379225
Cleavage stimulation factor subunit 2	Cstf2	-0.0590041	0.330209
U3 small nucleolar RNA-associated protein 25 homolog	Utp25	0.0550297	0.463177
Sodium bicarbonate cotransporter 3	Slc4a7	-0.522665	0.00177379
Protein phosphatase methylesterase 1	Ppme1	0.425277	0.000941542
WD repeat-containing protein 11	Wdr11	0.151045	0.136403
NADH dehydrogenase [ubiquinone] iron-sulfur protein 2, mitochondrial	Ndufs2	-0.0766615	0.12989
Pleiotropic regulator 1	Plrg1	0.0224765	0.711753
Rho GDP-dissociation inhibitor 1	Arhgdia	0.00225546	0.969533
DNA polymerase delta catalytic subunit	Pold1	0.059458	0.333209
E3 ubiquitin-protein ligase CHIP	Stub1	-0.117173	0.0861841
Cullin-4A	Cul4a	0.0775676	0.314682
Transcriptional repressor p66 alpha	Gatad2a	0.0973757	0.0689675
Replication factor C subunit 2	Rfc2	0.0830765	0.220042
Long-chain specific acyl-CoA dehydrogenase, mitochondrial	Acadl	0.122933	0.018381
Protein PRRC2A	Prrc2a	0.00299609	0.971399
Interleukin enhancer-binding factor 2	Ilf2	-0.0935037	0.121494
Exocyst complex component 4	Exoc4	0.474998	0.00236899
60S ribosomal protein L8	Rpl8	-0.250381	0.00602673
Proteasome subunit beta type-4	Psmb4	-0.315117	0.00234761
Acetoacetyl-CoA synthetase	Aacs	0.21221	0.0163372
Probable JmjC domain-containing histone demethylation protein 2C	Jmjd1c	0.066153	0.37879
Alpha-2-macroglobulin receptor-associated protein	Lrpap1	0.0489236	0.354703
Gephyrin	Gphn	0.0708994	0.279666
Proteasome subunit alpha type-7	Psma7	-0.223825	0.0190027
Signal transducing adapter molecule 2	Stam2	0.219521	0.0217567
Cell growth-regulating nucleolar protein	Lyar	-0.286603	0.0083832
LIM and SH3 domain protein 1	Lasp1	0.055191	0.232885
Sequestosome-1	Sqstm1	0.360658	0.000916664
THO complex subunit 5 homolog	Thoc5	-0.176301	0.0191872
Calcium-binding mitochondrial carrier protein SCaMC-1	Slc25a24	-0.299584	0.00150879
Treacle protein	Tcof1	-0.315187	0.000934143
Keratin, type II cytoskeletal 6A	KRT6A	NA	NA
Tripartite motif-containing protein 14	Trim14	-0.465568	0.000679708
OTU domain-containing protein 4	Otud4	0.0579018	0.296955
Peroxiredoxin-6	Prdx6	0.213873	0.00520082
Annexin A3	Anxa3	0.0191397	0.723043
Kinesin light chain 2	Klc2	0.1599	0.0730719
Calpain small subunit 1	Capns1	0.392359	0.00632362
Zinc finger RNA-binding protein	Zfr	-0.101665	0.103225
Protein lin-7 homolog C	Lin7c	0.183597	0.024242
Integrin beta-1	Itgb1	-0.0346898	0.651086
AP-1 complex subunit gamma-1	Ap1g1	0.129878	0.0454795
40S ribosomal protein S2	Rps2	-0.246222	0.00272757
Ras-related protein Rab-5C	Rab5c	-0.263761	0.00149636
Tyrosine-protein phosphatase non-receptor type 12	Ptpn12	-0.00229445	0.971635
F-actin-capping protein subunit alpha-1	Capza1	0.105438	0.0193401
UV excision repair protein RAD23 homolog B	Rad23b	0.0852197	0.218294
Small nuclear ribonucleoprotein Sm D2	Snrpd2	-0.281124	0.0694633
Translationally-controlled tumor protein	Tpt1	-0.411386	0.000981881
Mitogen-activated protein kinase 1	Mapk1	0.393393	0.00084124
Eukaryotic translation initiation factor 5A-1	Eif5a	0.0755021	0.38559
Casein kinase II subunit beta	Csnk2b	-0.0604045	0.30155
Tubulin beta-4B chain	Tubb4b	-0.00257849	0.986854
Glutamate--cysteine ligase catalytic subunit	Gclc	0.180297	0.0115646
U4/U6.U5 tri-snRNP-associated protein 2	Usp39	-0.166194	0.0124081
Nucleolar protein 10	Nol10	-0.15215	0.0657844
Prolyl 4-hydroxylase subunit alpha-1	P4ha1	-0.352736	0.000817317
SEC23-interacting protein	Sec23ip	-0.0746556	0.352253
RNA-binding protein 26	Rbm26	-0.0701298	0.146031
Nucleoporin NUP188	Nup188	-0.0100294	0.877515
ATP-dependent RNA helicase SUPV3L1, mitochondrial	Supv3l1	-0.242638	0.00795071
Scaffold attachment factor B2	Safb2	-0.135203	0.0496542
Sorting and assembly machinery component 50 homolog	Samm50	-0.183219	0.00339839
VPS35 endosomal protein-sorting factor-like	Vps35l	0.271709	0.00478909
Histone PARylation factor 1	Hpf1	0.080785	0.10697
PDZ and LIM domain protein 5	Pdlim5	0.106647	0.0686947
Pleckstrin homology domain-containing family O member 2	Plekho2	-0.0938532	0.0763211
Procollagen galactosyltransferase 1	Colgalt1	-0.169905	0.00907283
Transaldolase	Taldo1	0.419814	0.000608383
Leupaxin	Lpxn	0.0905217	0.0811527
E3 ubiquitin-protein ligase TRIM33	Trim33	0.00975423	0.838318
Ras-related protein Rab-5A	Rab5a	-0.0479614	0.387074
14-3-3 protein beta/alpha	Ywhab	-0.0369603	0.49592
SNW domain-containing protein 1	Snw1	0.119836	0.0135349
Ribonucleoprotein PTB-binding 1	Raver1	0.19783	0.00751775
BRCA2 and CDKN1A-interacting protein	Bccip	-0.0134957	0.844691
Protein SGT1 homolog	Sugt1	0.066853	0.0731903
Calcyclin-binding protein	Cacybp	0.073256	0.109239
Mitochondrial import receptor subunit TOM34	Tomm34	0.139783	0.036418
Transmembrane emp24 domain-containing protein 10	Tmed10	-0.150242	0.0100106
Cleavage and polyadenylation specificity factor subunit 1	Cpsf1	-0.148958	0.0229297
Pescadillo homolog	Pes1	-0.0205599	0.695098
Protein O-GlcNAcase	Oga	0.360668	0.000664411
Geranylgeranyl transferase type-2 subunit alpha	Rabggta	0.0652889	0.213147
ATP-dependent Clp protease ATP-binding subunit clpX-like, mitochondrial	Clpx	-0.237313	0.00490506
S-formylglutathione hydrolase	Esd	0.174441	0.0648948
Regulator of nonsense transcripts 2	Upf2	0.0531676	0.372274
A-kinase anchor protein 13	Akap13	0.00212317	0.9825
Multidrug resistance-associated protein 1	Abcc1	-0.229573	0.0201622
14-3-3 protein gamma	Ywhag	-0.0233859	0.846406
14-3-3 protein theta	Ywhaq	0.132962	0.0408883
Far upstream element (FUSE)-binding protein 3	Fubp3	-0.035173	0.629699
U3 small nucleolar RNA-associated protein 18 homolog	Utp18	-0.264484	0.0171533
Voltage-dependent anion-selective channel protein 1	Vdac1	-0.238461	0.00312176
Protein VAC14 homolog	Vac14	0.106083	0.125806
Phostensin	Ppp1r18	0.0411363	0.3589
Dedicator of cytokinesis protein 10	Dock10	0.0145613	0.853433
Cleft lip and palate transmembrane protein 1 homolog	Clptm1	-0.226954	0.0142004
Nicalin	Ncln	-0.169385	0.0280982
Ribosomal RNA processing protein 1 homolog B	Rrp1b	-0.280041	0.00416419
Acid ceramidase	Asah1	-0.00564251	0.893467
Protein kinase C and casein kinase substrate in neurons protein 2	Pacsin2	0.135761	0.0563956
Glucosamine-6-phosphate isomerase 1	Gnpda1	0.269615	0.0120235
ATP-dependent zinc metalloprotease YME1L1	Yme1l1	-0.340809	0.00444468
Superoxide dismutase [Mn], mitochondrial	Sod2	-0.267027	0.0399614
Anaphase-promoting complex subunit 1	Anapc1	0.0647775	0.35989
Ubiquitin-40S ribosomal protein S27a	Rps27a	0.681061	0.00877773
Ribosome biogenesis protein BOP1	Bop1	-0.0927093	0.140713
Leucine-rich repeat-containing protein 47	Lrrc47	0.215572	0.00721937
Ubiquitin-like protein ISG15	Isg15	-0.499795	0.000866499
Protein scribble homolog	Scrib	0.130559	0.257417
ER membrane protein complex subunit 1	Emc1	0.0240278	0.759553
DNA-directed RNA polymerase II subunit RPB2	Polr2b	-0.144289	0.0466252
Fatty acyl-CoA reductase 1	Far1	-0.344657	0.00266366
Signal-transducing adaptor protein 1	Stap1	-0.226706	0.00966025
Septin-6	Septin6	0.083789	0.110587
Cysteine desulfurase, mitochondrial	Nfs1	-0.207204	0.0241825
Macrophage-expressed gene 1 protein	Mpeg1	-0.793642	0.000707748
Kinesin-like protein	Kifc5b	0.318902	0.00463193
AP-2 complex subunit alpha-2	Ap2a2	-0.0811803	0.428468
AP-1 complex subunit mu-1	Ap1m1	-0.107884	0.191193
Lipoamide acyltransferase component of branched-chain alpha-keto acid dehydrogenase complex, mitochondrial	Dbt	-0.370052	0.00166018
Mortality factor 4-like protein 1	Morf4l1	0.57855	0.000463241
Arsenite methyltransferase	As3mt	0.394301	0.0016396
28S ribosomal protein S22, mitochondrial	Mrps22	-0.275284	0.00169977
Ribosome biogenesis protein WDR12	Wdr12	0.0134698	0.798719
THUMP domain-containing protein 3	Thumpd3	0.109279	0.0845879
WD repeat-containing protein 70	Wdr70	0.021085	0.805767
E3 ubiquitin-protein ligase DTX3L	Dtx3l	-0.382824	0.00427534
Protein PML	Pml	-0.525934	0.000394035
Docking protein 3	Dok3	0.209227	0.00791939
FYVE, RhoGEF and PH domain-containing protein 3	Fgd3	0.344363	0.00428361
Importin subunit alpha-1	Kpna2	0.876818	0.00245127
Serine/threonine-protein phosphatase 4 regulatory subunit 3A	Ppp4r3a	-0.135335	0.0184663
Rho GTPase-activating protein 25	Arhgap25	0.0367261	0.357694
Chromosome alignment-maintaining phosphoprotein 1	Champ1	-0.0146027	0.852224
Omega-amidase NIT2	Nit2	0.0218945	0.702593
26S proteasome non-ATPase regulatory subunit 14	Psmd14	0.0769915	0.24439
B-cell receptor-associated protein 31	Bcap31	-0.161093	0.0498747
Protein polybromo-1	Pbrm1	-0.0757059	0.291096
WD repeat-containing protein 18	Wdr18	0.0400153	0.510328
N-alpha-acetyltransferase 25, NatB auxiliary subunit	Naa25	-0.196536	0.0236598
ARF GTPase-activating protein GIT2	Git2	0.331767	0.0108484
Peptidyl-prolyl cis-trans isomerase B	Ppib	-0.225868	0.00557081
Rab GDP dissociation inhibitor alpha	Gdi1	0.164945	0.024242
Tensin-3	Tns3	0.323807	0.00325586
Protein ELYS	Ahctf1	-0.00810659	0.924846
Inter-alpha-trypsin inhibitor heavy chain H3	ITIH3	NA	NA
Y-box-binding protein 1	Ybx1	-0.215718	0.0269893
Translocon-associated protein subunit delta	Ssr4	-0.230067	0.0078452
Nuclear pore complex protein Nup107	Nup107	-0.262657	0.0150662
Bleomycin hydrolase	Blmh	0.00143643	0.9825
RNA polymerase-associated protein RTF1 homolog	Rtf1	0.30489	0.0039081
N-myc-interactor	Nmi	-0.456343	0.00138687
DDB1- and CUL4-associated factor 13	Dcaf13	-0.126465	0.150866
Torsin-3A	Tor3a	-0.67034	0.000900957
4F2 cell-surface antigen heavy chain	Slc3a2	0.0879891	0.394065
Lamina-associated polypeptide 2, isoforms alpha/zeta	Tmpo	-0.0845068	0.198408
Putative RNA-binding protein Luc7-like 2	Luc7l2	-0.028335	0.723454
Eukaryotic translation initiation factor 4B	Eif4b	-0.0652533	0.10844
Paxillin	Pxn	0.0693947	0.421882
4-trimethylaminobutyraldehyde dehydrogenase	Aldh9a1	0.112673	0.0789217
Heat shock 70 kDa protein 1B;Heat shock 70 kDa protein 1A	Hspa1b;Hspa1a	0.516665	0.00228134
Beta-enolase	Eno3	0.158748	0.241665
DEAH (Asp-Glu-Ala-His) box polypeptide 37	Dhx37	-0.184825	0.00871909
Protein bicaudal D homolog 2	Bicd2	0.135591	0.043939
40S ribosomal protein S17	Rps17	-0.202838	0.0284012
U4/U6 small nuclear ribonucleoprotein Prp3	Prpf3	0.0618707	0.349599
Heterogeneous nuclear ribonucleoprotein A/B	Hnrnpab	-0.202134	0.0111529
Ferritin light chain 1	Ftl1	0.372661	0.00770125
MAP kinase-activated protein kinase 2	Mapkapk2	0.263949	0.00331101
Golgi-specific brefeldin A-resistance factor 1	Gbf1	0.0850623	0.229338
2'-5' oligoadenylate synthase	Oas1g	-0.499373	0.00132677
Mitotic checkpoint serine/threonine-protein kinase BUB1 beta	Bub1b	1.07046	0.00321405
X-ray repair cross-complementing protein 6	Xrcc6	0.122327	0.0535393
Nuclear factor NF-kappa-B p105 subunit	Nfkb1	-0.0633977	0.439545
Extended synaptotagmin-1	Esyt1	-0.140579	0.0512112
Guanylate-binding protein 4	Gbp4	-0.696546	0.000394035
Translocation protein SEC63 homolog	Sec63	-0.429862	0.0956625
Opioid growth factor receptor	Ogfr	-0.261112	0.0309139
Coatomer subunit gamma-2	Copg2	0.0390164	0.563705
Nuclear receptor coactivator 5	Ncoa5	-0.340136	0.00674839
40S ribosomal protein S7	Rps7	-0.185996	0.0600079
Tax1-binding protein 1 homolog	Tax1bp1	0.850659	0.000477126
Pseudouridylate synthase 7 homolog	Pus7	0.140175	0.143326
Serine/threonine-protein kinase 10	Stk10	-0.143261	0.0497422
Elongation factor 1-beta	Eef1b	-0.212494	0.0604933
Very-long-chain 3-oxoacyl-CoA reductase	Hsd17b12	-0.123996	0.0429442
Alpha-N-acetylglucosaminidase	Naglu	0.0522725	0.336885
Keratin, type I cytoskeletal 10	KRT10	NA	NA
Protein-L-isoaspartate(D-aspartate) O-methyltransferase	Pcmt1	0.254053	0.00739973
Splicing factor U2AF 65 kDa subunit	U2af2	-0.0797396	0.295699
Acid sphingomyelinase-like phosphodiesterase 3b	Smpdl3b	-0.249168	0.00470234
Histidine triad nucleotide-binding protein 1	Hint1	0.119406	0.0557096
N-acylglucosamine 2-epimerase	Renbp	0.536977	0.00217845
Paired amphipathic helix protein Sin3a	Sin3a	-0.103971	0.0563672
Heterogeneous nuclear ribonucleoprotein D0	Hnrnpd	-0.250331	0.00621034
Zinc finger protein ZPR1	Zpr1	0.10206	0.0516192
Protein disulfide-isomerase TMX3	Tmx3	-0.165276	0.0205572
Trafficking protein particle complex subunit 12	Trappc12	0.239315	0.00741674
Nuclear pore complex protein Nup85	Nup85	-0.196204	0.00929157
Beta-centractin	Actr1b	0.149729	0.0913545
Huntingtin-interacting protein 1	Hip1	-0.00618012	0.939757
Aminoacylase-1	Acy1	-0.0531261	0.43942
RNA transcription, translation and transport factor protein	RTRAF	-0.00921982	0.893248
Serine/arginine-rich splicing factor 9	Srsf9	-0.295846	0.0056969
Dihydrolipoyllysine-residue succinyltransferase component of 2-oxoglutarate dehydrogenase complex, mitochondrial	Dlst	-0.1468	0.0376519
NADH dehydrogenase [ubiquinone] iron-sulfur protein 3, mitochondrial	Ndufs3	-0.0994405	0.121371
Acylglycerol kinase, mitochondrial	Agk	-0.170941	0.024242
Tropomodulin-3	Tmod3	0.294624	0.00164103
Serine/threonine-protein kinase 3	Stk3	0.176406	0.00672919
Vesicle-associated membrane protein-associated protein B	Vapb	-0.224621	0.00628391
DnaJ homolog subfamily B member 12	Dnajb12	0.0775685	0.259002
Succinate--CoA ligase [ADP-forming] subunit beta, mitochondrial	Sucla2	-0.117821	0.0522036
Tetratricopeptide repeat domain 37	Ttc37	0.121527	0.209084
Histone H2B type 1-M;Histone H2B type 1-H;Histone H2B type 2-B;Histone H2B type 1-C/E/G	H2bc14;H2bc9;Hist2h2bb;H2bc8	-0.0128178	0.89154
Galectin-3	Lgals3	0.198259	0.0351288
Serine hydroxymethyltransferase, cytosolic	Shmt1	-0.127784	0.108292
Aldehyde dehydrogenase family 16 member A1	Aldh16a1	0.0334674	0.357841
Transcription termination factor 2	Ttf2	0.330412	0.00793269
Active breakpoint cluster region-related protein	Abr	0.165839	0.0559097
Peptidyl-prolyl cis-trans isomerase FKBP3	Fkbp3	0.117747	0.0419518
Peptidyl-prolyl cis-trans isomerase FKBP5	Fkbp5	-0.250252	0.00458142
Erlin-2	Erlin2	-0.121607	0.0512112
Armadillo repeat-containing protein 6	Armc6	-0.00664415	0.942907
von Willebrand factor A domain-containing protein 8	Vwa8	-0.202888	0.00692121
Vam6/Vps39-like protein	Vps39	0.0738411	0.268789
Argininosuccinate lyase	Asl	0.188407	0.0168597
Citrate synthase, mitochondrial	Cs	-0.336349	0.00534805
39S ribosomal protein L45, mitochondrial	Mrpl45	-0.359814	0.00239024
DnaJ homolog subfamily C member 10	Dnajc10	-0.290097	0.00910831
Golgin subfamily A member 5	Golga5	-0.110512	0.045982
Transducin beta-like protein 2	Tbl2	-0.329258	0.00323278
Pericentriolar material 1 protein	Pcm1	0.420134	0.00337593
Coronin-1C	Coro1c	0.112086	0.0675985
Sec24-related gene family, member C (S. cerevisiae)	Sec24c	-0.0323357	0.476509
Casein kinase II subunit alpha'	Csnk2a2	0.145253	0.0348884
Septin-7	Septin7	0.102143	0.111781
Crooked neck-like protein 1	Crnkl1	0.23199	0.00319333
E3 ubiquitin-protein ligase RBBP6	Rbbp6	0.111687	0.0900123
Proteasome activator complex subunit 4	Psme4	0.191557	0.147898
Nucleosome assembly protein 1-like 4	Nap1l4	-0.00223481	0.965188
ERO1-like protein alpha	Ero1a	-0.117034	0.0756479
Leucine-rich repeat-containing protein 59	Lrrc59	0.0551016	0.626098
Ran-binding protein 3	Ranbp3	0.084475	0.204744
Peptidyl-prolyl cis-trans isomerase NIMA-interacting 4	Pin4	0.0816275	0.371844
General transcription factor IIE subunit 1	Gtf2e1	0.20516	0.016003
1,4-alpha-glucan-branching enzyme	Gbe1	0.235937	0.00462085
28S ribosomal protein S29, mitochondrial	Dap3	-0.557178	0.00152652
DENN domain-containing protein 4C	Dennd4c	0.313914	0.000855204
Protein IMPACT	Impact	1.18459	9.1572e-05
Pericentrin	Pcnt	0.292321	0.0511937
Eukaryotic translation initiation factor 3 subunit J-A	Eif3j1	0.124135	0.0515339
RNA-binding protein 27	Rbm27	0.181039	0.0602567
Epidermal growth factor receptor substrate 15-like 1	Eps15l1	0.119676	0.270179
Sepiapterin reductase	Spr	0.23201	0.0277775
Coiled-coil and C2 domain-containing protein 1B	Cc2d1b	0.202975	0.00785348
Probable ATP-dependent RNA helicase DDX47	Ddx47	-0.0727833	0.263274
Exportin-7	Xpo7	0.194547	0.00607384
YLP motif-containing protein 1	Ylpm1	-0.00278227	0.968039
SH3 and PX domain-containing protein 2B	Sh3pxd2b	0.335489	0.00179032
Synaptosomal-associated protein 23	Snap23	0.0635774	0.490101
Plasminogen	PLG	NA	NA
Caspase-1	Casp1	0.601662	0.000308225
Growth arrest-specific protein 7	Gas7	0.349954	0.00243505
Sodium/potassium-transporting ATPase subunit alpha-3	Atp1a3	-0.0419184	0.529641
Tudor and KH domain-containing protein	Tdrkh	-0.00681533	0.891873
Nucleolar protein 9	Nop9	-0.134079	0.0466824
Ubiquitin carboxyl-terminal hydrolase 47	Usp47	0.304526	0.0115761
mRNA export factor	Rae1	-0.0757909	0.0978424
Guanine nucleotide exchange factor for Rab-3A	Rab3il1	0.300605	0.0164681
Farnesyl pyrophosphate synthase	Fdps	0.0338512	0.603062
Electron transfer flavoprotein subunit alpha, mitochondrial	Etfa	-0.169525	0.0235032
Tropomyosin 3, related sequence 7	Tpm3-rs7	0.191645	0.0349473
Chromodomain-helicase-DNA-binding protein 1	Chd1	-0.0926399	0.183267
Calpastatin	Cast	0.412988	0.00495657
Ras-related protein Rab-2A	Rab2a	-0.141383	0.164839
Aladin	Aaas	-0.180431	0.132757
60S ribosomal protein L10	Rpl10	-0.0776207	0.489172
Cytochrome P450 20A1	Cyp20a1	-0.281424	0.0242275
Microtubule-associated protein 1S	Map1s	0.192301	0.0237124
Interferon-induced protein 44-like	Ifi44l	-0.478161	0.000772473
Protein AATF	Aatf	-0.0756213	0.215405
Trafficking protein particle complex subunit 11	Trappc11	0.406505	0.00179032
FRY-like transcription coactivator	Fryl	0.093376	0.231365
E3 ubiquitin-protein ligase UBR2	Ubr2	0.484247	0.00341802
Sec1 family domain-containing protein 1	Scfd1	-0.236672	0.0181869
Cytoplasmic dynein 1 light intermediate chain 1	Dync1li1	0.293614	0.00785348
Methionine adenosyltransferase 2 subunit beta	Mat2b	0.206827	0.00592307
Phosphatidylinositol 4-kinase type 2-alpha	Pi4k2a	-0.0412642	0.476127
Replication factor C subunit 1	Rfc1	-0.0186559	0.750148
Pre-rRNA-processing protein TSR1 homolog	Tsr1	-0.0277014	0.753336
Serine/threonine-protein kinase OSR1	Oxsr1	0.0637698	0.136403
TBC1 domain family member 5	Tbc1d5	0.268801	0.0105084
Golgi resident protein GCP60	Acbd3	0.0483346	0.501412
Liprin-beta-1	Ppfibp1	0.113398	0.219914
Zinc finger CCCH domain-containing protein 13	Zc3h13	0.0430961	0.534517
Signal-induced proliferation-associated protein 1	Sipa1	0.0688844	0.202167
Prostaglandin G/H synthase 2	Ptgs2	-0.987215	6.35328e-05
tRNA (guanine(26)-N(2))-dimethyltransferase	Trmt1	0.086083	0.111634
Microtubule-associated protein RP/EB family member 1	Mapre1	0.0868225	0.254585
WD repeat-containing protein 26	Wdr26	0.146252	0.0179997
Glycerol-3-phosphate acyltransferase 4	Gpat4	-0.224641	0.0316628
Vacuolar protein sorting-associated protein 28 homolog	Vps28	0.209903	0.0939146
Ribonucleoside-diphosphate reductase subunit M2	Rrm2	-0.550157	0.000707285
Beta-hexosaminidase subunit alpha	Hexa	0.118837	0.121494
GTP-binding protein	Ifi47	-0.81854	0.000152645
Ubiquitin carboxyl-terminal hydrolase 8	Usp8	0.0557057	0.503335
CAP-Gly domain-containing linker protein 2	Clip2	0.160837	0.0863214
SR-related CTD-associated factor 11	Scaf11	-0.275656	0.00433109
Ras-related protein Rap-1A	Rap1a	-0.110643	0.25419
Zinc finger CCCH domain-containing protein 18	Zc3h18	0.110868	0.245159
Protein kinase C delta type	Prkcd	0.281856	0.00765201
Serine-protein kinase ATM	Atm	-0.179316	0.077437
Sec24-related gene family, member D (S. cerevisiae)	Sec24d	0.201657	0.0391314
Syndetin	Vps50	0.361414	0.00550378
RNA N6-adenosine-methyltransferase METTL16	Mettl16	0.0924442	0.27523
Nuclear pore complex protein Nup50	Nup50	-0.0745638	0.326991
Differentially expressed in FDCP 6	Def6	0.316799	0.00446066
PC4 and SFRS1-interacting protein	Psip1	-0.146066	0.0597685
Ankycorbin	Rai14	0.185972	0.133871
Selenocysteine-specific elongation factor	Eefsec	0.0287743	0.806319
Ceramide transfer protein	Cert1	-0.0465912	0.407888
Intersectin-1	Itsn1	0.0769114	0.265081
Hemopexin	HPX	NA	NA
ADP-ribosylation factor-binding protein GGA2	Gga2	0.824076	0.000335083
Brefeldin A-inhibited guanine nucleotide-exchange protein 2	Arfgef2	0.147741	0.105571
Coiled-coil domain-containing protein 6	Ccdc6	0.031826	0.653507
Bridging integrator 2	Bin2	0.204896	0.014283
Histone-lysine N-methyltransferase SETD1A	Setd1a	0.0246132	0.748123
Ribose-phosphate diphosphokinase;Ribose-phosphate pyrophosphokinase 1	Prps1l3;Prps1	0.121537	0.152804
Polypeptide N-acetylgalactosaminyltransferase 1	Galnt1	-0.247032	0.00321405
H-2 class I histocompatibility antigen, L-D alpha chain	H2-L	-0.441854	0.000477126
Protease 1	NA	NA	NA
Heat shock 70 kDa protein 1-like	Hspa1l	0.411386	0.00244479
Thioredoxin-dependent peroxide reductase, mitochondrial	Prdx3	-0.151749	0.0193768
Branched-chain-amino-acid aminotransferase, cytosolic	Bcat1	-0.0866815	0.0701034
60S ribosomal protein L12	Rpl12	-0.2651	0.00443747
Adenosine kinase	Adk	0.108346	0.056413
Serine palmitoyltransferase 2	Sptlc2	-0.315843	0.00327583
Heterochromatin protein 1-binding protein 3	Hp1bp3	0.0761733	0.249932
Myosin regulatory light chain 12B	Myl12b	0.200034	0.00516252
Glycerol-3-phosphate dehydrogenase 1-like protein	Gpd1l	0.139033	0.0503718
Protein PRRC1	Prrc1	-0.00960982	0.893248
Voltage-dependent anion-selective channel protein 3	Vdac3	-0.131141	0.019701
Eukaryotic translation initiation factor 2D	Eif2d	0.123832	0.0955456
Double-strand break repair protein MRE11	Mre11	-0.0682847	0.116829
Splicing factor 1	Sf1	-0.073435	0.331921
40S ribosomal protein S9	Rps9	-0.202665	0.0118555
Polycomb protein Suz12	Suz12	-0.0492936	0.397814
Mannosyl-oligosaccharide glucosidase	Mogs	-0.235349	0.00408846
Polypyrimidine tract-binding protein 3	Ptbp3	-0.0342161	0.579934
26S proteasome non-ATPase regulatory subunit 5	Psmd5	0.260415	0.00416606
Methionine aminopeptidase 1	Metap1	0.140545	0.169711
WASH complex subunit 5	Washc5	0.088274	0.308271
Vacuolar protein sorting-associated protein 52 homolog	Vps52	0.278509	0.00565767
Peptidylprolyl isomerase domain and WD repeat-containing protein 1	Ppwd1	-0.072868	0.293338
Protein arginine N-methyltransferase 5	Prmt5	0.00367202	0.959356
Hydroxymethylglutaryl-CoA synthase, cytoplasmic	Hmgcs1	-0.130542	0.0749698
Parafibromin	Cdc73	0.158096	0.0173797
Long-chain-fatty-acid--CoA ligase 5	Acsl5	-0.136977	0.025874
Amyloid beta A4 precursor protein-binding family B member 1-interacting protein	Apbb1ip	0.139492	0.0445161
ADP-dependent glucokinase	Adpgk	-0.132396	0.0301474
ADP-ribosylation factor-like protein 8A	Arl8a	-0.0672679	0.146281
ATP-dependent DNA/RNA helicase DHX36	Dhx36	0.21631	0.0223445
Transcriptional repressor p66-beta	Gatad2b	0.0204552	0.734355
MKI67 FHA domain-interacting nucleolar phosphoprotein	Nifk	-0.106076	0.0299594
Probable ATP-dependent RNA helicase DDX41	Ddx41	0.00974068	0.881352
Serine/threonine-protein phosphatase 6 regulatory subunit 3	Ppp6r3	0.195505	0.0121073
SWI/SNF-related matrix-associated actin-dependent regulator of chromatin subfamily D member 2	Smarcd2	-0.213069	0.0346934
DnaJ homolog subfamily B member 11	Dnajb11	-0.249096	0.0135634
NADH dehydrogenase [ubiquinone] 1 alpha subcomplex subunit 10, mitochondrial	Ndufa10	-0.16992	0.102987
GrpE protein homolog 1, mitochondrial	Grpel1	-0.248912	0.00694547
Methylcrotonoyl-CoA carboxylase subunit alpha, mitochondrial	Mccc1	-0.0545259	0.279175
Biliverdin reductase A	Blvra	0.129179	0.04869
PAT complex subunit CCDC47	Ccdc47	-0.0736204	0.236756
Protein PBDC1	Pbdc1	0.0626411	0.357621
mRNA turnover protein 4 homolog	Mrto4	-0.217985	0.00827461
Cytochrome c1, heme protein, mitochondrial	Cyc1	-0.26524	0.0114551
Nitric oxide synthase-interacting protein	Nosip	0.485934	0.00173734
Cytochrome b-c1 complex subunit 2, mitochondrial	Uqcrc2	-0.367543	0.000959362
cAMP-dependent protein kinase type I-alpha regulatory subunit	Prkar1a	0.556131	0.000608383
Electron transfer flavoprotein subunit beta	Etfb	-0.168042	0.0723876
DAZ-associated protein 1	Dazap1	-0.0253655	0.861041
Transforming protein RhoA	Rhoa	0.0810829	0.0836034
Transmembrane emp24 domain-containing protein 2	Tmed2	-0.199262	0.0652454
Metastasis-associated protein MTA2	Mta2	-0.201752	0.024242
Proteasome subunit alpha type-1	Psma1	0.00940099	0.925079
Nibrin	Nbn	-0.0220526	0.709837
V-type proton ATPase 116 kDa subunit a1	Atp6v0a1	-0.202814	0.0200285
Rab GTPase-activating protein 1	Rabgap1	0.179149	0.0950375
RNA helicase	Dhx16	-0.0193798	0.852743
A-kinase anchor protein 10, mitochondrial	Akap10	0.0610428	0.320442
Tropomyosin alpha-3 chain	Tpm3	0.210276	0.0153855
V-type proton ATPase subunit d 1	Atp6v0d1	-0.161997	0.0167393
SWI/SNF complex subunit SMARCC2	Smarcc2	-0.104545	0.143139
Eukaryotic translation initiation factor 2 subunit 1	Eif2s1	0.0595576	0.165348
Probable ATP-dependent RNA helicase DDX10	Ddx10	-0.16542	0.0313587
Transmembrane 9 superfamily member 4	Tm9sf4	-0.36233	0.00150698
Lanosterol synthase	Lss	-0.327872	0.00132586
Retinoblastoma-binding protein 5	Rbbp5	-0.0041885	0.944051
Phosphoinositide 3-kinase regulatory subunit 4	Pik3r4	0.210476	0.0411734
UTP--glucose-1-phosphate uridylyltransferase	Ugp2	0.0824964	0.157461
Torsin-1A-interacting protein 1	Tor1aip1	-0.461022	0.000707285
Mannose-1-phosphate guanyltransferase alpha	Gmppa	0.194828	0.0067717
ADP-ribosylation factor GTPase-activating protein 2	Arfgap2	0.261496	0.0137236
MMS19 nucleotide excision repair protein homolog	Mms19	0.408748	0.0446959
Cysteine and histidine-rich domain-containing protein 1	Chordc1	0.356941	0.029121
Outer mitochondrial transmembrane helix translocase	Atad1	-0.125562	0.0500256
F-box-like/WD repeat-containing protein TBL1X	Tbl1x	-0.230625	0.0177656
Twinfilin-2	Twf2	0.0984446	0.396161
Eukaryotic translation initiation factor 3 subunit G	Eif3g	0.0540217	0.25507
Lysine-rich nucleolar protein 1	Knop1	-0.0554538	0.410096
Ppfia1 protein	Ppfia1	0.165053	0.08532
Signal recognition particle subunit SRP72	Srp72	0.146962	0.0765919
NK13	Serpinb6b	-0.13772	0.097652
Disintegrin and metalloproteinase domain-containing protein 10	Adam10	-0.429571	0.00335766
Nucleolysin TIAR	Tial1	-0.115142	0.15379
Protein transport protein Sec23A	Sec23a	0.110334	0.269804
Zinc finger CCCH-type antiviral protein 1	Zc3hav1	0.214282	0.0235554
RNA polymerase II subunit A C-terminal domain phosphatase	Ctdp1	0.309661	0.0204457
S-adenosylhomocysteine hydrolase-like protein 1	Ahcyl1	0.292031	0.0204461
Aftiphilin	Aftph	0.0406304	0.742854
N-acetylglucosamine-6-sulfatase	Gns	0.0553483	0.266367
Pyridoxal kinase	Pdxk	0.223206	0.0310216
IQ motif and SEC7 domain-containing protein 1	Iqsec1	0.253135	0.0160299
Exocyst complex component 1	Exoc1	0.52571	0.00090145
Thioredoxin domain-containing protein 5	Txndc5	-0.26051	0.0017905
Mitochondrial 2-oxoglutarate/malate carrier protein	Slc25a11	-0.290636	0.00785348
General transcription factor IIE subunit 2	Gtf2e2	0.258664	0.0242804
N-terminal kinase-like protein	Scyl1	0.174034	0.0680125
Synaptosomal-associated protein 29	Snap29	0.235697	0.0104253
Vesicle-trafficking protein SEC22b	Sec22b	-0.0503114	0.350989
C-terminal-binding protein 1	Ctbp1	-0.0128657	0.832598
Dihydrofolate reductase	Dhfr	-0.0275113	0.855465
Cyclin-dependent kinase 4	Cdk4	0.20767	0.102185
Ribosomal RNA processing protein 1 homolog A	Rrp1	0.0481748	0.652754
WD repeat-containing protein 5	Wdr5	-0.0155607	0.879689
Guanine nucleotide exchange protein SMCR8	Smcr8	0.182103	0.0267328
Coiled-coil domain-containing protein 93	Ccdc93	0.226564	0.00830945
THO complex subunit 1	Thoc1	-0.331744	0.00244479
Perilipin-3	Plin3	0.410369	0.0135039
Protein SET	Set	0.0462188	0.657582
Epididymis-specific alpha-mannosidase	Man2b2	-0.0198048	0.759553
Tyrosine-protein phosphatase non-receptor type 2	Ptpn2	0.1609	0.0194906
Pre-B-cell leukemia transcription factor-interacting protein 1	Pbxip1	0.0122203	0.823197
E3 ubiquitin-protein ligase HERC2	Herc2	0.277223	0.0339188
Zinc finger protein ubi-d4	Dpf2	0.103655	0.284039
Sarcoplasmic/endoplasmic reticulum calcium ATPase 3	Atp2a3	0.0173039	0.766826
Protein strawberry notch homolog 1	Sbno1	0.0857244	0.281759
Probable E3 ubiquitin-protein ligase HERC4	Herc4	-0.269586	0.00592606
Cell division cycle protein 23 homolog	Cdc23	-0.08038	0.429588
Zinc finger protein 622	Znf622	0.548271	0.00048823
Nuclear factor NF-kappa-B p100 subunit	Nfkb2	0.0333186	0.428468
E3 ubiquitin-protein ligase ARIH1	Arih1	0.267633	0.0157756
Dedicator of cytokinesis protein 11	Dock11	0.0344141	0.588157
Protein Wiz	Wiz	-0.0669825	0.199824
Isocitrate dehydrogenase [NAD] subunit gamma 1, mitochondrial	Idh3g	-0.263998	0.0343198
Lysine-specific demethylase 3B	Kdm3b	0.0250262	0.751049
WD repeat-containing protein 43	Wdr43	-0.435166	0.00328655
Centrosomal protein of 55 kDa	Cep55	0.271973	0.0259114
Tyrosine--tRNA ligase, mitochondrial	Yars2	-0.285951	0.0236027
Osteopontin	Spp1	-1.06002	9.1572e-05
DNA-(apurinic or apyrimidinic site) endonuclease	Apex1	0.104096	0.159537
Nitric oxide synthase, inducible	Nos2	-0.44103	0.00615549
Glutathione synthetase	Gss	0.199132	0.0157708
Disintegrin and metalloproteinase domain-containing protein 8	Adam8	-0.476827	0.00107538
Protein phosphatase 1 regulatory subunit 21	Ppp1r21	0.285403	0.0364428
5'-AMP-activated protein kinase catalytic subunit alpha-1	Prkaa1	0.215586	0.00745858
Tumor susceptibility gene 101 protein	Tsg101	0.16544	0.0953105
Glomulin	Glmn	0.0109431	0.852743
Mixed lineage kinase domain-like protein	Mlkl	0.296594	0.00138687
Neuropilin-2	Nrp2	-0.500001	0.00663158
Intercellular adhesion molecule 1	Icam1	0.0092168	0.937729
Chromobox protein homolog 3	Cbx3	-0.24748	0.0705422
Prolyl 3-hydroxylase OGFOD1	Ogfod1	0.173041	0.0439943
Chromobox protein homolog 5	Cbx5	-0.243575	0.0291971
Phosphoribosyl pyrophosphate synthase-associated protein 2	Prpsap2	0.334983	0.0043895
Cyclin-dependent kinase 1	Cdk1	0.053098	0.372615
NEDD8 ultimate buster 1	Nub1	0.100397	0.0423249
CD180 antigen	Cd180	-0.396746	0.00702082
Parkinson disease protein 7 homolog	Park7	0.100161	0.112879
Endoplasmic reticulum-Golgi intermediate compartment protein 1	Ergic1	0.0537198	0.457701
AMP deaminase 3	Ampd3	0.323925	0.00385688
Integrin-linked protein kinase	Ilk	0.113561	0.221899
Medium-chain specific acyl-CoA dehydrogenase, mitochondrial	Acadm	-0.0912977	0.233205
Rho GTPase-activating protein 30	Arhgap30	0.0932017	0.18741
Pre-mRNA-splicing regulator WTAP	Wtap	-0.0918894	0.109521
26S proteasome non-ATPase regulatory subunit 10	Psmd10	0.367173	0.00503727
60S acidic ribosomal protein P0	Rplp0	-0.232405	0.0130396
Hepatoma-derived growth factor	Hdgf	0.237512	0.0163372
Luc7-like protein 3	Luc7l3	-0.0969409	0.117798
Exopolyphosphatase PRUNE1	Prune1	0.544781	0.00289601
Regulator of chromosome condensation	Rcc1	-0.262793	0.0145829
DNA repair protein XRCC4	Xrcc4	0.336052	0.00934738
PHD finger protein 11	Phf11	-0.461493	0.000976594
2',5'-phosphodiesterase 12	Pde12	0.0588479	0.452165
Unconventional myosin-Ig	Myo1g	0.119034	0.0674909
TGF-beta-activated kinase 1 and MAP3K7-binding protein 1	Tab1	0.0633764	0.309176
Basic leucine zipper and W2 domain-containing protein 2	Bzw2	0.0505127	0.261896
High mobility group protein B2	Hmgb2	0.0720254	0.173507
Perilipin-2	Plin2	1.3006	0.000394035
Proteasome activator complex subunit 2	Psme2	0.0162456	0.802192
Nucleoside diphosphate kinase B	Nme2	0.00958171	0.873353
WD repeat-containing protein 48	Wdr48	0.204278	0.0814947
HCLS1-associated protein X-1	Hax1	0.288798	0.0314073
Galectin-1	Lgals1	0.0164549	0.797186
Carnitine O-palmitoyltransferase 2, mitochondrial	Cpt2	-0.267803	0.0176956
Holocytochrome c-type synthase	Hccs	-0.363307	0.00118874
Catechol O-methyltransferase	Comt	0.14609	0.109916
Eukaryotic translation initiation factor 4E	Eif4e	0.0848639	0.217019
Large proline-rich protein BAG6	Bag6	0.387477	0.000981881
Lysosomal alpha-glucosidase	Gaa	0.377163	0.00567673
RNA-binding protein Raly	Raly	-0.0256568	0.683465
Sorting nexin-6	Snx6	0.212686	0.0273706
2'-5'-oligoadenylate synthase-like protein 1	Oasl1	0.149009	0.376652
Neutral amino acid transporter B(0)	Slc1a5	-0.294642	0.00300943
Delta(14)-sterol reductase LBR	Lbr	-0.331454	0.0566645
Aspartyl aminopeptidase	Dnpep	0.0869142	0.342344
GTP-binding nuclear protein Ran	Ran	0.0868316	0.638378
Apol9a protein	Apol9a	0.0839641	0.219684
Basic leucine zipper and W2 domain-containing protein 1	Bzw1	-0.0205984	0.657582
Thioredoxin reductase 1, cytoplasmic	Txnrd1	0.0303744	0.489172
Bromodomain PHD finger transcription factor	Bptf	0.0615467	0.383069
Caspase recruitment domain-containing protein 9	Card9	0.185822	0.0233568
Coatomer subunit epsilon	Cope	0.263859	0.0121042
Hemoglobin subunit alpha	HBA	NA	NA
Calmodulin-1;Calmodulin-2;Calmodulin-3	Calm1;Calm2;Calm3	0.0254736	0.718459
Monocyte differentiation antigen CD14	Cd14	-0.279257	0.0213881
Malate dehydrogenase, cytoplasmic	Mdh1	0.267226	0.00168429
Methylmalonyl-CoA mutase, mitochondrial	Mmut	-0.21986	0.00379225
Ribosomal protein S6 kinase alpha-3	Rps6ka3	0.0508615	0.325835
Guanine nucleotide-binding protein subunit alpha-13	Gna13	-0.0182703	0.798719
Huntingtin	Htt	0.126208	0.113638
Dolichyl-diphosphooligosaccharide--protein glycosyltransferase subunit STT3A	Stt3a	-0.215687	0.00802431
Quinone oxidoreductase	Cryz	0.0891928	0.10726
ADP/ATP translocase 1	Slc25a4	-0.27766	0.109521
Inosine-5'-monophosphate dehydrogenase 1	Impdh1	-0.0654689	0.317504
Ras-related protein Rab-1A	Rab1A	-0.0605723	0.358539
Serine/threonine-protein kinase N1	Pkn1	0.32897	0.000707285
G patch domain-containing protein 4	Gpatch4	-0.125508	0.0691065
General transcription factor IIF subunit 1	Gtf2f1	0.343716	0.00142491
Endoplasmic reticulum metallopeptidase 1	Ermp1	-0.104508	0.0497523
Probable ATP-dependent RNA helicase DDX49	Ddx49	-0.0920155	0.0616809
Receptor-interacting serine/threonine-protein kinase 1	Ripk1	0.322496	0.00416419
Iron-sulfur clusters transporter ABCB7, mitochondrial	Abcb7	-0.255007	0.0141722
Jupiter microtubule associated homolog 2	Jpt2	0.0768048	0.233528
Ran-binding protein 10	Ranbp10	0.119413	0.0391891
MICOS complex subunit Mic27	Apool	-0.15744	0.0196491
Echinoderm microtubule-associated protein-like 2	Eml2	0.085916	0.12128
Protein FAM98B	Fam98b	0.0618356	0.174678
E3 ubiquitin-protein ligase TRIM56	Trim56	0.159847	0.0381408
Autophagy-related protein 2 homolog B	Atg2b	0.348411	0.00574923
Protein THEM6	Them6	0.0763791	0.150989
Sec24-related gene family, member B (S. cerevisiae)	Sec24b	0.050698	0.501412
Leucine-rich repeat and WD repeat-containing protein 1	LRWD1	0.0430865	0.519168
Lysophosphatidylcholine acyltransferase 2	Lpcat2	-0.16342	0.0390295
NHL repeat-containing protein 2	Nhlrc2	0.0951326	0.243864
Septin-11	Septin11	0.040584	0.585169
Probable E3 ubiquitin-protein ligase IRF2BPL	Irf2bpl	0.0368029	0.54666
3-hydroxyisobutyryl-CoA hydrolase, mitochondrial	Hibch	0.188903	0.00782721
U3 small nucleolar RNA-associated protein 4 homolog	Utp4	-0.164841	0.0801323
Mini-chromosome maintenance complex-binding protein	Mcmbp	0.204	0.00778831
WD repeat-containing protein 74	Wdr74	-0.146793	0.0180239
Heterogeneous nuclear ribonucleoprotein U-like protein 1	Hnrnpul1	-0.145812	0.0164452
Bifunctional UDP-N-acetylglucosamine 2-epimerase/N-acetylmannosamine kinase	Gne	0.101637	0.321558
U3 small nucleolar RNA-interacting protein 2	Rrp9	-0.414158	0.00118874
Gbp6 protein	Gbp7	-0.795398	0.000275043
TAR DNA-binding protein 43	Tardbp	-0.0549943	0.409381
Flavin reductase (NADPH)	Blvrb	0.623878	0.000707285
Clathrin interactor 1	Clint1	0.212109	0.00831365
Ankyrin repeat domain-containing protein 17	Ankrd17	0.21228	0.00829435
Actin-related protein 2/3 complex subunit 5	Arpc5	0.102614	0.137862
Ragulator complex protein LAMTOR1	Lamtor1	-0.211281	0.0073303
GTP-binding protein SAR1b	Sar1b	-0.00152752	0.979326
RNA-binding protein 7	Rbm7	-0.229342	0.0519327
Vacuolar protein sorting-associated protein VTA1 homolog	Vta1	0.175946	0.00609219
OCIA domain-containing protein 1	Ociad1	0.05374	0.605064
Tumor protein D54	Tpd52l2	0.253522	0.00245304
Replication factor C subunit 5	Rfc5	0.0677227	0.255603
Phosphoribosyl pyrophosphate synthase-associated protein 1	Prpsap1	0.432588	0.00150486
Vesicular integral-membrane protein VIP36	Lman2	-0.056164	0.309589
Transmembrane protein 43	Tmem43	0.00826033	0.887674
ATP synthase subunit d, mitochondrial	Atp5pd	-0.210898	0.00406665
Serine hydrolase-like protein	Serhl	-0.427581	0.00514312
Striatin-3	Strn3	0.0477365	0.292004
Mortality factor 4-like protein 2	Morf4l2	0.394613	0.00298092
Serine/threonine-protein kinase TBK1	Tbk1	0.166109	0.0547987
Interferon-activated gene 207	Ifi207	-0.342326	0.00312029
ADP-ribosylation factor-interacting protein 1	Arfip1	0.111643	0.0650998
GTP-binding protein 1	Gtpbp1	0.179982	0.0247131
Hemoglobin fetal subunit beta	NA	NA	NA
Nucleoside diphosphate kinase A	Nme1	-0.10069	0.332173
Lysosomal protective protein	Ctsa	-0.171046	0.0457187
Transcription initiation factor IIB	Gtf2b	0.616326	0.000394035
Proteasome subunit beta type-7	Psmb7	-1.08267	0.00031759
Epidermal growth factor receptor kinase substrate 8	Eps8	0.443162	0.00276234
Src kinase-associated phosphoprotein 2	Skap2	0.246381	0.00922287
Neurabin-2	Ppp1r9b	0.0643361	0.362703
SR-related and CTD-associated factor 4	Scaf4	-0.041091	0.60056
Pogo transposable element with ZNF domain	Pogz	0.0471365	0.674815
Tubulin-specific chaperone E	Tbce	0.0888092	0.204072
Collectin-12	Colec12	-0.326483	0.00139948
Inorganic pyrophosphatase 2, mitochondrial	Ppa2	-0.207283	0.0376469
Cleavage stimulation factor subunit 1	Cstf1	-0.024242	0.651437
Translation initiation factor eIF-2B subunit alpha	Eif2b1	0.0067699	0.950319
Periodic tryptophan protein 1 homolog	Pwp1	-0.0687462	0.203448
6-phosphogluconolactonase	Pgls	0.103099	0.064998
39S ribosomal protein L19, mitochondrial	Mrpl19	-0.235916	0.0102037
LIM domain and actin-binding protein 1	Lima1	0.039991	0.494657
Pleckstrin homology domain-containing family A member 2	Plekha2	0.271732	0.00453926
Selenocysteine lyase	Scly	0.181658	0.0219212
Bifunctional polynucleotide phosphatase/kinase	Pnkp	0.11817	0.0336813
Sterol-4-alpha-carboxylate 3-dehydrogenase, decarboxylating	Nsdhl	-0.155864	0.0413917
Proteasome subunit beta type-2	Psmb2	-0.311444	0.00885863
Succinate--CoA ligase [ADP/GDP-forming] subunit alpha, mitochondrial	Suclg1	-0.25001	0.0219128
Nucleolar complex protein 2 homolog	Noc2l	-0.363906	0.00262609
Neurochondrin	Ncdn	0.404632	0.00177415
Dedicator of cytokinesis protein 5	Dock5	0.0402003	0.49932
Importin subunit alpha-4	Kpna3	-0.0299999	0.643138
Beta-galactosidase	Glb1	0.116075	0.138366
Nuclear protein localization protein 4 homolog	Nploc4	0.0915267	0.115361
Rho GTPase-activating protein 17	Arhgap17	0.240216	0.010366
NADPH:adrenodoxin oxidoreductase, mitochondrial	Fdxr	-0.113438	0.0906665
La-related protein 4B	Larp4b	0.236825	0.0121073
U2 snRNP-associated SURP motif-containing protein	U2surp	-0.214718	0.0299104
Periodic tryptophan protein 2 homolog	Pwp2	-0.125265	0.15728
Splicing factor 45	Rbm17	-0.211476	0.0152593
Transcription factor 25	Tcf25	0.595984	0.000664411
Rab GTPase-binding effector protein 2	Rabep2	0.18741	0.015377
BAG family molecular chaperone regulator 2	Bag2	0.134135	0.0526918
Kinesin-like protein KIF2C	Kif2c	0.943503	0.000647844
Cleavage stimulation factor subunit 3	Cstf3	-0.103142	0.130617
CDK5 regulatory subunit-associated protein 3	Cdk5rap3	-0.178967	0.07509
Lysophosphatidylserine lipase ABHD12	Abhd12	0.00694527	0.957698
ELKS/Rab6-interacting/CAST family member 1	Erc1	0.115686	0.229341
Epoxide hydrolase 1	Ephx1	0.161611	0.00965043
Ribosome biogenesis protein BRX1 homolog	Brix1	-0.160799	0.106959
Mediator of RNA polymerase II transcription subunit 12	Med12	-0.0197615	0.84315
Ubiquitin-like protein 4A	Ubl4a	0.128581	0.0521174
RAC-alpha serine/threonine-protein kinase	Akt1	0.105502	0.314715
Antigen peptide transporter 2	Tap2	-0.433901	0.000429141
Green fluorescent protein	GFP	NA	NA
60S ribosomal protein L13	Rpl13	-0.21074	0.0120576
Protein 4.1	Epb41	0.0917827	0.156371
Ubiquitin carboxyl-terminal hydrolase 10	Usp10	0.0170651	0.675302
Lysine-specific demethylase 2A	Kdm2a	0.558722	0.00472098
40S ribosomal protein S14	Rps14	-0.195795	0.106156
Unconventional myosin-If	Myo1f	0.198182	0.02574
Serine/threonine-protein phosphatase 2A 56 kDa regulatory subunit gamma isoform	Ppp2r5c	0.0234073	0.749613
Fibronectin type III domain-containing protein 3B	Fndc3b	-0.0412923	0.404749
La-related protein 4	Larp4	0.150761	0.0573929
Death-inducer obliterator 1	Dido1	-0.0572308	0.490101
Bcl-2-associated transcription factor 1	Bclaf1	-0.196748	0.0403829
Metastasis-associated protein MTA1	Mta1	-0.275302	0.0552806
Actin-histidine N-methyltransferase	Setd3	0.234693	0.0057532
Transmembrane emp24 domain-containing protein 9	Tmed9	-0.0939012	0.0570199
COP9 signalosome complex subunit 1	Gps1	0.0749604	0.135662
Ubiquilin-4	Ubqln4	0.0463625	0.638585
mRNA cap guanine-N7 methyltransferase	Rnmt	0.204907	0.00321405
Something about silencing protein 10	Utp3	-0.158685	0.0215792
Disintegrin and metalloproteinase domain-containing protein 17	Adam17	-0.569009	0.000477126
Double-stranded RNA-binding protein Staufen homolog 1	Stau1	0.40188	0.00321405
SPI6	Serpinb9	0.147107	0.0755365
Dual specificity mitogen-activated protein kinase kinase 3	Map2k3	0.0397667	0.653507
SRSF protein kinase 1	Srpk1	0.159493	0.0945487
Histone H1.3	H1-3	-0.131282	0.251478
Immunoglobulin-binding protein 1	Igbp1	0.192651	0.0774482
Protein mono-ADP-ribosyltransferase PARP12	Parp12	-0.284917	0.00243505
7SK snRNA methylphosphate capping enzyme	Mepce	-0.165788	0.203103
Coronin-7	Coro7	0.213796	0.0299147
Thioredoxin-related transmembrane protein 2	Tmx2	0.0531604	0.308725
Pentatricopeptide repeat domain-containing protein 3, mitochondrial	Ptcd3	-0.412597	0.00332437
Terminal uridylyltransferase 7	Tut7	-0.00017858	0.998223
Kinesin-like protein KIF15	Kif15	0.138848	0.0910607
Cytoplasmic dynein 1 light intermediate chain 2	Dync1li2	0.348887	0.000981881
Integrator complex subunit 3	Ints3	-0.144445	0.206651
Lysophosphatidic acid phosphatase type 6	Acp6	-0.128779	0.198408
GDH/6PGL endoplasmic bifunctional protein	H6pd	-0.0756018	0.363033
Kelch domain-containing protein 4	Klhdc4	0.312954	0.00328655
DCN1-like protein 5	Dcun1d5	0.272219	0.00994654
Zinc finger CCHC domain-containing protein 8	Zcchc8	-0.202667	0.02404
Mitochondrial import receptor subunit TOM40 homolog	Tomm40	-0.222016	0.0279966
Prolactin regulatory element-binding protein	Preb	-0.0335993	0.571205
2-amino-3-ketobutyrate coenzyme A ligase, mitochondrial	Gcat	-0.31262	0.00192751
Serine/threonine-protein kinase A-Raf	Araf	0.242693	0.0161494
Signal recognition particle receptor subunit beta	Srprb	-0.293778	0.00138674
Gem (Nuclear organelle) associated protein 4	Gemin4	-0.0528991	0.598967
Brain-specific angiogenesis inhibitor 1-associated protein 2	Baiap2	0.35555	0.00456459
60S ribosomal export protein NMD3	Nmd3	0.480687	0.00328655
CCR4-NOT transcription complex subunit 9	Cnot9	0.14026	0.0416153
Peroxiredoxin-4	Prdx4	-0.210086	0.00516744
Phosphatidylinositol 5-phosphate 4-kinase type-2 alpha	Pip4k2a	0.0974263	0.376922
Interferon-related developmental regulator 1	Ifrd1	1.45945	3.61817e-05
E3 ubiquitin-protein ligase CBL	Cbl	0.0212006	0.776437
YTH domain-containing family protein 1	Ythdf1	0.0949071	0.211521
Peroxiredoxin-2	Prdx2	0.192828	0.00709483
Rab3 GTPase-activating protein catalytic subunit	Rab3gap1	0.164033	0.0473922
Electron transfer flavoprotein-ubiquinone oxidoreductase, mitochondrial	Etfdh	0.0361577	0.38948
Trifunctional enzyme subunit beta, mitochondrial	Hadhb	-0.150771	0.163438
Sodium/myo-inositol cotransporter	Slc5a3	-0.00668625	0.943692
BAG family molecular chaperone regulator 3	Bag3	1.06062	9.1572e-05
PHD finger protein 3	Phf3	0.327299	0.0649479
IQ motif-containing GTPase-activating protein 3	Iqgap3	-0.0157783	0.924846
Cytoplasmic aconitate hydratase	Aco1	0.145614	0.0516455
40S ribosomal protein S5	Rps5	0.0725771	0.466616
Apoptosis regulator BAX	Bax	0.103028	0.25663
Ubiquitin-protein ligase E3C	Ube3c	-0.234946	0.00937825
Vesicle-associated membrane protein-associated protein A	Vapa	-0.146347	0.0254844
N-alpha-acetyltransferase 50	Naa50	0.512589	0.00331101
AFG3-like protein 1	Afg3l1	-0.315236	0.00207254
Receptor-type tyrosine-protein phosphatase alpha	Ptpra	-0.17736	0.0288784
Histone-lysine N-methyltransferase EZH2	Ezh2	-0.103878	0.419361
Sorcin	Sri	0.15313	0.0086111
Protein Hook homolog 3	Hook3	0.468783	0.00245127
Testis-expressed protein 10	Tex10	-0.120509	0.110482
Replication protein A 32 kDa subunit	Rpa2	0.0591417	0.534963
Proteasome subunit beta type-5	Psmb5	-0.687931	0.00129193
Thyroid adenoma-associated protein homolog	Thada	-0.0770806	0.490527
SLAIN motif-containing protein 2	Slain2	0.0459744	0.596937
Probable ATP-dependent RNA helicase DHX58	Dhx58	-0.416791	0.00919823
Chromodomain-helicase-DNA-binding protein 1-like	Chd1l	0.0888802	0.208016
39S ribosomal protein L46, mitochondrial	Mrpl46	-0.348924	0.00954216
Osteoclast-stimulating factor 1	Ostf1	0.291794	0.0121042
ATPase GET3	Get3	0.113639	0.0774332
Alcohol dehydrogenase class-3	Adh5	0.161944	0.0382013
Histone acetyltransferase KAT7	Kat7	0.373245	0.00671019
U1 small nuclear ribonucleoprotein 70 kDa	Snrnp70	-0.0797112	0.437091
Phosphatidylinositol 3-kinase catalytic subunit type 3	Pik3c3	0.179439	0.206013
Cell division cycle and apoptosis regulator protein 1	Ccar1	-0.16173	0.0198271
E3 ubiquitin-protein ligase RNF114	Rnf114	-0.0309495	0.704826
HEAT repeat-containing protein 3	Heatr3	0.0972493	0.166781
Protein unc-45 homolog A	Unc45a	0.324104	0.0273637
p21-activated protein kinase-interacting protein 1	Pak1ip1	0.243327	0.0561633
Interferon-activable protein 203	Ifi203	-0.404048	0.00189536
Choline-phosphate cytidylyltransferase A	Pcyt1a	0.303434	0.0118565
Monoacylglycerol lipase ABHD6	Abhd6	0.0337111	0.527657
Proteasome subunit alpha type-6	Psma6	-0.332605	0.00648273
Peptidyl-prolyl cis-trans isomerase G	Ppig	-0.29177	0.0102755
Histone acetyltransferase p300	Ep300	-0.0621011	0.302462
Brefeldin A-inhibited guanine nucleotide-exchange protein 1	Arfgef1	0.174558	0.0461001
Serine/arginine-rich splicing factor 5	Srsf5	-0.174657	0.00862447
Peptidyl-prolyl cis-trans isomerase FKBP8	Fkbp8	-0.0565925	0.281502
SWI/SNF-related matrix-associated actin-dependent regulator of chromatin subfamily E member 1	Smarce1	-0.0187811	0.741432
Docking protein 2	Dok2	-0.084159	0.285237
DNA (cytosine-5)-methyltransferase 3A	Dnmt3a	-0.259086	0.00477979
IgE-binding protein	Iap	0.125791	0.0633152
Thioredoxin	Txn	0.147171	0.289115
Bifunctional methylenetetrahydrofolate dehydrogenase/cyclohydrolase, mitochondrial	Mthfd2	-0.394896	0.00132677
Cytochrome c oxidase subunit 5B, mitochondrial	Cox5b	-0.396872	0.0468153
Ras-related protein Rab-6A	Rab6a	-0.132764	0.115069
Vacuolar protein sorting-associated protein 26A	Vps26a	0.276305	0.00552443
Long-chain-fatty-acid--CoA ligase 1	Acsl1	-0.135072	0.0162691
Glutathione reductase, mitochondrial	Gsr	0.107406	0.384551
Arylsulfatase B	Arsb	-0.0375105	0.572657
U2 small nuclear ribonucleoprotein A'	Snrpa1	-0.161706	0.0240081
40S ribosomal protein S8	Rps8	-0.186732	0.0171649
ADP-ribosylation factor 6	Arf6	-0.0953604	0.291096
Wiskott-Aldrich syndrome protein homolog	Was	-0.0443679	0.394925
Caspase-3	Casp3	0.123099	0.211527
Spermine synthase	Sms	-0.0396309	0.274717
60S acidic ribosomal protein P2	Rplp2	-0.144141	0.202955
Peroxiredoxin-5, mitochondrial	Prdx5	-0.350787	0.0210648
Transcriptional repressor protein YY1	Yy1	0.261683	0.0695154
Polynucleotide 5'-hydroxyl-kinase NOL9	Nol9	-0.152938	0.0533494
Threonine--tRNA ligase, mitochondrial	Tars2	-0.110636	0.0685972
ESF1 homolog	Esf1	-0.0670884	0.37782
G-patch domain and KOW motifs-containing protein	Gpkow	0.11029	0.0316628
Casein kinase II subunit alpha	Csnk2a1	-0.110515	0.0752755
KH domain-containing, RNA-binding, signal transduction-associated protein 1	Khdrbs1	-0.301037	0.0214986
Importin subunit alpha-5	Kpna1	0.105284	0.0254565
Prosaposin	Psap	0.0345718	0.622142
Tumor protein D52	Tpd52	0.214838	0.00633898
Serine/arginine-rich splicing factor 1	Srsf1	-0.262299	0.0157633
Zinc finger CCCH domain-containing protein 4	Zc3h4	-0.119551	0.050853
Formin-binding protein 4	Fnbp4	-0.111832	0.18145
Inositol hexakisphosphate and diphosphoinositol-pentakisphosphate kinase 2	Ppip5k2	0.0213624	0.675302
Malectin	Mlec	-0.183197	0.0552806
Serine/threonine-protein phosphatase 1 regulatory subunit 10	Ppp1r10	0.222544	0.0148802
Glutamate-rich WD repeat-containing protein 1	Grwd1	0.0276699	0.659673
Volume-regulated anion channel subunit LRRC8D	Lrrc8d	-0.284038	0.00256488
CDKN2A-interacting protein	Cdkn2aip	0.0369797	0.613954
Small glutamine-rich tetratricopeptide repeat-containing protein alpha	Sgta	0.0743615	0.0618382
28S ribosomal protein S27, mitochondrial	Mrps27	-0.178792	0.0473922
60S ribosomal protein L24	Rpl24	-0.187805	0.00565767
ADP-ribose pyrophosphatase, mitochondrial	Nudt9	-0.0510681	0.494657
YTH domain-containing family protein 3	Ythdf3	0.0218208	0.876881
Vacuolar protein sorting-associated protein 26B	Vps26b	0.0305364	0.758903
Protein HGH1 homolog	Hgh1	0.188933	0.00750376
Negative elongation factor B	Nelfb	-0.043296	0.510497
Abl interactor 1	Abi1	0.181844	0.0202688
DIS3-like exonuclease 2	Dis3l2	0.123379	0.0665301
Serine/threonine-protein phosphatase 4 regulatory subunit 1	Ppp4r1	-0.0261638	0.803991
Nucleoporin NDC1	Ndc1	-0.0958242	0.152225
Ubiquitin-like modifier-activating enzyme 5	Uba5	0.0899438	0.253635
Nucleolar complex protein 3 homolog	Noc3l	-0.341244	0.00476205
Phosphatidylinositol 5-phosphate 4-kinase type-2 gamma	Pip4k2c	0.0304421	0.704826
mRNA-decapping enzyme 1A	Dcp1a	0.191625	0.025639
eEF1A lysine and N-terminal methyltransferase	EEF1AKNMT	0.192874	0.0306248
Retinoid-inducible serine carboxypeptidase	Scpep1	0.234136	0.00993511
Exosome complex component RRP41	Exosc4	-0.0645112	0.49315
Protein arginine N-methyltransferase 3	Prmt3	0.0519811	0.344294
cGMP-dependent 3',5'-cyclic phosphodiesterase	Pde2a	0.206504	0.00667218
WW domain-binding protein 11	Wbp11	-0.0494832	0.427957
Replication factor C subunit 4	Rfc4	0.0927493	0.169316
1,2-dihydroxy-3-keto-5-methylthiopentene dioxygenase	Adi1	0.606295	0.000308225
Ras-related GTP-binding protein C	Rragc	0.117874	0.104622
Hydroxyacylglutathione hydrolase, mitochondrial	Hagh	0.403558	0.0124262
RNA-binding protein 10	Rbm10	-0.255087	0.00693676
Hsc70-interacting protein	St13	0.0970778	0.224142
Chloride channel CLIC-like protein 1	Clcc1	-0.147877	0.0447084
Phosphoserine phosphatase	Psph	0.4664	0.00343754
ATP synthase F(0) complex subunit B1, mitochondrial	Atp5pb	-0.170219	0.0361396
Transmembrane protein 33	Tmem33	-0.146224	0.166781
Mitochondrial potassium channel ATP-binding subunit	Abcb8	-0.232437	0.0444469
Single-stranded DNA-binding protein, mitochondrial	Ssbp1	-0.378991	0.00165448
ATP-dependent (S)-NAD(P)H-hydrate dehydratase	Naxd	0.0391894	0.615755
Eukaryotic translation elongation factor 1 epsilon-1	Eef1e1	-0.0543808	0.463243
Protein SAAL1	Saal1	0.0421585	0.539064
RNA polymerase II-associated protein 3	Rpap3	0.224377	0.00304598
RNA 3'-terminal phosphate cyclase	RtcA	0.177175	0.0451543
Mitochondrial import inner membrane translocase subunit TIM50	Timm50	-0.525421	0.0103657
Proline-, glutamic acid- and leucine-rich protein 1	Pelp1	-0.0422069	0.375982
Short/branched chain specific acyl-CoA dehydrogenase, mitochondrial	Acadsb	-0.153265	0.0357055
Protein phosphatase inhibitor 2	Ppp1r2	0.439474	0.0142037
LRP chaperone MESD	Mesd	-0.17262	0.01644
NADH dehydrogenase [ubiquinone] 1 alpha subcomplex subunit 13	Ndufa13	-0.236219	0.00694547
Stromal cell-derived factor 2-like protein 1	Sdf2l1	-0.232261	0.00157789
Isovaleryl-CoA dehydrogenase, mitochondrial	Ivd	-0.0941542	0.180684
ADP-sugar pyrophosphatase	Nudt5	0.185335	0.0198411
CD2-associated protein	Cd2ap	0.0558743	0.419361
Protein numb homolog	Numb	0.327325	0.0103053
Prostaglandin E synthase 3	Ptges3	-0.0190876	0.889132
tRNA pseudouridine synthase A	Pus1	0.0724876	0.15706
Eukaryotic translation initiation factor 4H	Eif4h	0.102663	0.307985
Cathepsin Z	Ctsz	-0.102908	0.251855
Nuclear factor of activated T-cells 5	Nfat5	-0.151175	0.0171533
TFG protein	Tfg	-0.084283	0.17169
Aminoacyl tRNA synthase complex-interacting multifunctional protein 1	Aimp1	0.0585035	0.218243
5'-3' exoribonuclease 1	Xrn1	-0.0561134	0.31902
Caspase-7	Casp7	0.144031	0.182952
GA-binding protein alpha chain	Gabpa	0.161523	0.0385872
Core-binding factor subunit beta	Cbfb	0.140587	0.271275
Protein SMG7	Smg7	0.166104	0.0404283
Immunity-related GTPase family M protein 1	Irgm1	-0.716521	0.000275043
Probable aminopeptidase NPEPL1	Npepl1	0.260869	0.0425431
Ankyrin repeat and LEM domain-containing protein 2	Ankle2	0.111697	0.105659
Serine/threonine-protein kinase SIK3	Sik3	-0.0699897	0.140014
Acetyl-Coenzyme A acetyltransferase 3;Acetyl-CoA acetyltransferase, cytosolic	Acat3;Acat2	-0.0151265	0.822972
Ras-related GTP-binding protein A	Rraga	0.159046	0.0390379
Nucleolar protein 11	Nol11	-0.21653	0.0182988
Dipeptidyl peptidase 9	Dpp9	-0.0085456	0.927321
ATP-binding cassette sub-family F member 3	Abcf3	0.605568	0.000441433
Enhancer of mRNA-decapping protein 3	Edc3	0.130963	0.0944784
Protein FAM3C	Fam3c	-0.306288	0.00287534
Suppressor of SWI4 1 homolog	Ppan	-0.193339	0.0332075
Dynactin subunit 2	Dctn2	0.325849	0.00172711
S-methyl-5'-thioadenosine phosphorylase	Mtap	-0.0816436	0.215209
Methylthioribose-1-phosphate isomerase	Mri1	0.0686464	0.334175
Magnesium transporter protein 1	Magt1	-0.127052	0.0521965
Acyl carrier protein, mitochondrial	Ndufab1	-0.300353	0.00785348
Minor histocompatibility antigen H13	Hm13	-0.390155	0.0256019
m7GpppX diphosphatase	Dcps	0.00025055	0.99649
NADH-cytochrome b5 reductase 1	Cyb5r1	-0.0453157	0.365735
Protein-associating with the carboxyl-terminal domain of ezrin	Scyl3	0.13885	0.159697
Eukaryotic translation initiation factor 3 subunit K	Eif3k	-0.227129	0.00952993
Focadhesin	Focad	0.00863196	0.93248
Queuosine salvage protein	2210016F16Rik	0.0211525	0.772084
Urokinase-type plasminogen activator	Plau	-1.0521	0.000298972
Lysosome-associated membrane glycoprotein 1	Lamp1	-0.0890233	0.429944
GTP-binding protein SAR1a	Sar1a	0.0178994	0.856446
Flap endonuclease 1	Fen1	0.16168	0.0930556
Striatin-4	Strn4	-0.00129097	0.986958
Dynein light chain roadblock-type 1	Dynlrb1	0.182123	0.0245132
Hippocalcin-like protein 1	Hpcal1	-0.0303558	0.398383
Cas scaffolding protein family member 4	Cass4	0.739298	0.000628682
Pachytene checkpoint protein 2 homolog	Trip13	0.116782	0.1881
Large subunit GTPase 1 homolog	Lsg1	0.0485246	0.349858
Pre-mRNA-splicing factor 38A	Prpf38a	-0.142114	0.0906779
45 kDa calcium-binding protein	Sdf4	-0.699713	0.00145147
Syntaxin-binding protein 2	Stxbp2	0.132321	0.158256
CCR4-NOT transcription complex subunit 10	Cnot10	0.211154	0.0478995
Nuclear cap-binding protein subunit 3	Ncbp3	-0.0275232	0.615405
Tetratricopeptide repeat protein 27	Ttc27	0.216396	0.0104442
Interferon-inducible protein AIM2	Aim2	0.199059	0.0135039
Acyl-CoA (8-3)-desaturase	Fads1	-0.291574	0.0195715
BolA-like protein 1	Bola1	-0.135071	0.0486642
Origin recognition complex subunit 3	Orc3	-0.0667417	0.265081
Actin-related protein 2/3 complex subunit 3	Arpc3	-0.0460128	0.642375
Acyl-coenzyme A thioesterase 2, mitochondrial	Acot2	0.0710047	0.32913
N-acetyl-D-glucosamine kinase	Nagk	0.157999	0.138366
Inner nuclear membrane protein Man1	Lemd3	-0.244869	0.0200241
60S ribosomal protein L9	Rpl9-ps6;Rpl9	-0.0301993	0.813273
Uncharacterized protein	NA	NA	NA
Barrier-to-autointegration factor	Banf1	-0.0817197	0.115132
Phosphatidylinositol 3-kinase regulatory subunit alpha	Pik3r1	0.160504	0.080986
40S ribosomal protein S15a	Rps15a	-0.31925	0.0241419
Beta-1,4 N-acetylgalactosaminyltransferase 1	B4galnt1	-0.19255	0.0908751
Patatin-like phospholipase domain-containing protein 6	Pnpla6	-0.165818	0.0381983
Sorting nexin-27	Snx27	-0.0273079	0.615899
Synergin gamma	Synrg	-0.0010907	0.991977
Protein LTV1 homolog	Ltv1	0.621187	0.000537422
Bromodomain-containing protein 2	Brd2	0.183315	0.0508709
TIP41-like protein	Tiprl	0.300571	0.00780395
Anaphase-promoting complex subunit 5	Anapc5	-0.190113	0.0221106
Synaptojanin-1	Synj1	0.082023	0.357841
Beta-arrestin-2	Arrb2	-0.0565846	0.468812
LIM and senescent cell antigen-like-containing domain protein 1	Lims1	0.213799	0.192055
BRCA1-associated protein	Brap	0.839545	0.00462085
Pre-mRNA-splicing factor SPF27	Bcas2	-0.225432	0.00476205
Peroxisomal acyl-coenzyme A oxidase 3	Acox3	0.102043	0.29518
Interferon-activable protein 202	Ifi202	-0.478122	0.000337475
Nuclear receptor corepressor 2	Ncor2	-0.0619458	0.252724
cAMP-dependent protein kinase catalytic subunit beta	Prkacb	-0.108179	0.0641441
Acidic leucine-rich nuclear phosphoprotein 32 family member E	Anp32e	0.287896	0.00827431
28S ribosomal protein S31, mitochondrial	Mrps31	-0.330026	0.00465418
HEAT repeat-containing protein 5B	Heatr5b	0.317776	0.00882445
NmrA-like family domain-containing protein 1	Nmral1	-0.140617	0.153956
U3 small nucleolar ribonucleoprotein protein IMP3	Imp3	-0.181949	0.068187
Proline-serine-threonine phosphatase-interacting protein 2	Pstpip2	0.186601	0.0104164
PDZ domain-containing protein GIPC1	Gipc1	0.0601111	0.302596
Lysosomal acid lipase/cholesteryl ester hydrolase	Lipa	-0.323951	0.00428361
Phosphomannomutase 2	Pmm2	0.135086	0.0703665
Galectin-9	Lgals9	-0.424387	0.00102971
26S proteasome non-ATPase regulatory subunit 4	Psmd4	0.222859	0.0242804
Muskelin	Mkln1	0.333219	0.00384073
Serum albumin	ALB	NA	NA
Delta-aminolevulinic acid dehydratase	Alad	0.0641982	0.321461
Hydroxymethylglutaryl-CoA lyase, mitochondrial	Hmgcl	-0.254462	0.0408132
Protein mago nashi homolog	Magoh	-0.158227	0.0762699
Protein FRG1	Frg1	0.330408	0.000909278
Putative phospholipase B-like 2	Plbd2	0.0819083	0.319405
RNA exonuclease 4	Rexo4	0.000782939	0.994404
Pre-mRNA-splicing factor RBM22	Rbm22	0.0054371	0.943816
Neurolysin, mitochondrial	Nln	-0.0329457	0.560279
Dynein light chain 2, cytoplasmic	Dynll2	0.386431	0.0408165
Oligoribonuclease, mitochondrial	Rexo2	0.0840668	0.414254
Exportin-4	Xpo4	-0.011001	0.878131
S-phase kinase-associated protein 1	Skp1	0.459795	0.000868264
TNFAIP3-interacting protein 1	Tnip1	-0.277497	0.0231189
Protein virilizer homolog	Virma	-0.0761458	0.316877
Transcriptional repressor NF-X1	Nfx1	0.531822	0.00267507
THO complex subunit 6 homolog	Thoc6	-0.0618436	0.446548
UDP-glucuronosyltransferase 1A7	Ugt1a7	0.062627	0.245591
Cytohesin-4	Cyth4	0.175561	0.0512112
Serine/threonine-protein phosphatase 4 regulatory subunit 3B	Ppp4r3b	-0.0897349	0.188435
Tapasin	Tapbp	-0.369022	0.00256488
Protein sel-1 homolog 1	Sel1l	-0.144572	0.147352
Cytoplasmic dynein 1 intermediate chain 2	Dync1i2	0.230084	0.154988
Thymidylate synthase	Tyms	-0.0445271	0.730206
ATP-binding cassette sub-family D member 1	Abcd1	-0.241937	0.019575
DNA-binding protein Ikaros	Ikzf1	-0.148181	0.379262
Caseinolytic peptidase B protein homolog	Clpb	-0.362598	0.00776019
Endophilin-A2	Sh3gl1	0.267047	0.0219757
FH1/FH2 domain-containing protein 1	Fhod1	0.320682	0.00659046
Hematopoietic prostaglandin D synthase	Hpgds	0.140583	0.209402
Zinc finger E-box-binding homeobox 2	Zeb2	0.176112	0.0560522
URB2 ribosome biogenesis 2 homolog (S. cerevisiae)	Urb2	-0.384154	0.0109936
MLV-related proviral Env polyprotein	NA	-0.613485	0.000664411
Cyclin-dependent kinase 7	Cdk7	0.34262	0.0387509
TRAF-type zinc finger domain-containing protein 1	Trafd1	0.223747	0.00776903
RNA polymerase II elongation factor ELL2	Ell2	-0.0452937	0.674764
Cystatin-B	Cstb	0.176743	0.170444
Leucine-rich repeat flightless-interacting protein 2	Lrrfip2	0.279141	0.0118555
Exocyst complex component 7	Exoc7	0.332561	0.00831916
Protein S100-A4	S100a4	0.242532	0.0540931
Tyrosine-protein kinase JAK1	Jak1	0.729628	0.000546752
Putative sodium-coupled neutral amino acid transporter 10	Slc38a10	0.329789	0.0102755
Serine/threonine-protein kinase MRCK beta	Cdc42bpb	-0.0197961	0.874515
Pumilio homolog 2	Pum2	0.0438476	0.6424
Mitofusin-1	Mfn1	-0.0343142	0.733279
RNA-binding protein 4;RNA-binding protein 4B	Rbm4;Rbm4b	0.276659	0.0127577
Toll-like receptor 2	Tlr2	0.074211	0.289198
Erbin	Erbin	-0.0881789	0.317574
Kinetochore-associated protein 1	Kntc1	0.0569498	0.463362
Solute carrier organic anion transporter family member 4A1	Slco4a1	-0.299986	0.0175778
Tumor necrosis factor alpha-induced protein 8-like protein 2	Tnfaip8l2	0.440597	0.0417825
Zinc finger, MYND-type-containing 8	Zmynd8	-0.058921	0.568767
Stathmin	Stmn1	0.00155717	0.987972
[truncated: 4,073 more rows]

## Sheet: RAW_LPS_sgHUWE1_vs_LPS_sgROSA
Protein names	Gene names	logFC_LPS_HUWE1 vs LPS_sgROSA	adj.P.Val_LPS_HUWE1 vs LPS_sgROSA
Plectin	Plec	-0.160675	0.0337904
AHNAK nucleoprotein (desmoyokin)	Ahnak	-0.183238	0.040719
Cytoplasmic dynein 1 heavy chain 1	Dync1h1	0.0425007	0.334672
Microtubule-actin cross-linking factor 1	Macf1	-0.0595877	0.272221
E3 ubiquitin-protein ligase RNF213	Rnf213	-0.0638782	0.152573
Myosin-9	Myh9	0.115144	0.0637113
Talin-1	Tln1	-0.0204323	0.664109
Clathrin heavy chain 1	Cltc	0.00774369	0.90101
Filamin-B	Flnb	-0.102809	0.0539941
Pyruvate kinase PKM	Pkm	0.0764143	0.193155
Filamin-A	Flna	-0.0122405	0.821816
Fatty acid synthase	Fasn	0.200062	0.0167748
Ras GTPase-activating-like protein IQGAP1	Iqgap1	0.131369	0.038265
Proliferation marker protein Ki-67	Mki67	0.541942	0.0132237
E3 SUMO-protein ligase RanBP2	Ranbp2	-0.0386261	0.485328
E3 ubiquitin-protein ligase UBR4	Ubr4	0.101472	0.120375
eIF-2-alpha kinase activator GCN1	Gcn1	0.0652014	0.212056
Heat shock protein HSP 90-beta	Hsp90ab1	0.160612	0.0386293
U5 small nuclear ribonucleoprotein 200 kDa helicase	Snrnp200	-0.111404	0.0593614
Prolow-density lipoprotein receptor-related protein 1	Lrp1	-0.247314	0.0139091
Pre-mRNA-processing-splicing factor 8	Prpf8	-0.108215	0.0611725
Heterogeneous nuclear ribonucleoprotein M	Hnrnpm	-0.1014	0.45423
Nucleoprotein TPR	Tpr	-0.0374691	0.48937
Heat shock cognate 71 kDa protein	Hspa8	0.0682076	0.375355
Actin, cytoplasmic 1	Actb	0.0613898	0.373952
Chromodomain-helicase-DNA-binding protein 4	Chd4	0.00399953	0.945133
Midasin	Mdn1	-0.0721343	0.286967
Alpha-2-macroglobulin	A2M	NA	NA
Myb-binding protein 1A	Mybbp1a	-0.0985628	0.0729745
CAD protein	Cad	0.090021	0.229121
Plastin-2	Lcp1	0.081934	0.132193
Bifunctional glutamate/proline--tRNA ligase	Eprs1	0.0715094	0.245034
Vimentin	Vim	-0.201135	0.0295963
Transitional endoplasmic reticulum ATPase	Vcp	0.0110881	0.826565
Elongation factor 2	Eef2	0.0771434	0.268683
60 kDa heat shock protein, mitochondrial	Hspd1	-0.174324	0.0241018
Vacuolar protein sorting-associated protein 13C	Vps13c	0.0103435	0.862548
Glyceraldehyde-3-phosphate dehydrogenase	Gapdh	0.155226	0.0716004
Prelamin-A/C	Lmna	-0.0219907	0.653818
Heat shock 70 kDa protein 4	Hspa4	0.123233	0.0435764
Dedicator of cytokinesis protein 2	Dock2	0.0181711	0.791342
Myoferlin	Myof	-0.439165	0.00294546
Leucine-rich PPR motif-containing protein, mitochondrial	Lrpprc	-0.198155	0.0248342
T-complex protein 1 subunit gamma	Cct3	0.076907	0.152397
Nuclear mitotic apparatus protein 1	Numa1	-0.00530664	0.923845
Vigilin	Hdlbp	-0.0161621	0.726506
Eukaryotic translation initiation factor 3 subunit A	Eif3a	0.145904	0.0320443
Proteasome adapter and scaffold protein ECM29	Ecpas	0.0801613	0.224965
ATP-dependent RNA helicase DDX3X	Ddx3x	0.0723434	0.13312
Arginine--tRNA ligase, cytoplasmic	Rars1	0.0165676	0.735349
Afadin	Afdn	0.103013	0.165874
Fructose-bisphosphate aldolase A	Aldoa	-0.00957991	0.912825
Importin-5	Ipo5	0.0405355	0.561974
Endoplasmin	Hsp90b1	-0.251473	0.0121364
Trifunctional enzyme subunit alpha, mitochondrial	Hadha	-0.170858	0.0733065
HEAT repeat-containing protein 1	Heatr1	-0.194142	0.0359025
Uncharacterized protein	APOB	NA	NA
Cytoskeleton-associated protein 5	Ckap5	0.15582	0.0550392
Nucleolar RNA helicase 2	Ddx21	-0.123593	0.0580661
Alpha-actinin-1	Actn1	-0.0274013	0.47827
Coatomer subunit alpha	Copa	0.0697115	0.137323
Glucose-6-phosphate 1-dehydrogenase X	G6pdx	-0.0137409	0.755438
Sarcoplasmic/endoplasmic reticulum calcium ATPase 2	Atp2a2	-0.206895	0.0225182
Coatomer subunit beta	Copb1	0.106558	0.154777
Eukaryotic translation initiation factor 4 gamma 1	Eif4g1	0.0815105	0.132461
Trifunctional purine biosynthetic protein adenosine-3	Gart	0.112961	0.161223
Phosphoglycerate kinase 1	Pgk1	0.0657473	0.22293
Heat shock protein 105 kDa	Hsph1	-0.0636173	0.143497
Sodium/potassium-transporting ATPase subunit alpha-1	Atp1a1	-0.0165441	0.754778
Alpha-enolase	Eno1	0.0582924	0.29715
Protein RRP5 homolog	Pdcd11	-0.148076	0.053076
Staphylococcal nuclease domain-containing protein 1	Snd1	-0.0597454	0.168157
Hexokinase-2	Hk2	-0.174543	0.031357
Small subunit processome component 20 homolog	Utp20	-0.261158	0.0193045
Leucine--tRNA ligase, cytoplasmic	Lars1	0.0495766	0.423029
ATP-dependent RNA helicase A	Dhx9	-0.0510717	0.352319
Structural maintenance of chromosomes protein 1A	Smc1a	0.0750809	0.187973
Splicing factor 3B subunit 1	Sf3b1	-0.0980184	0.0730439
Ubiquitin-like modifier-activating enzyme 1	Uba1	0.0880063	0.0962194
UDP-glucose:glycoprotein glucosyltransferase 1	Uggt1	-0.138191	0.052898
Rab GDP dissociation inhibitor beta	Gdi2	0.129042	0.058611
Monofunctional C1-tetrahydrofolate synthase, mitochondrial	Mthfd1l	-0.277179	0.00727093
DNA (cytosine-5)-methyltransferase 1	Dnmt1	0.0933044	0.129211
Bifunctional purine biosynthesis protein ATIC	Atic	0.087583	0.129107
Transketolase	Tkt	0.194556	0.0248342
Splicing factor, proline- and glutamine-rich	Sfpq	0.0660059	0.447808
DNA topoisomerase 2-alpha	Top2a	0.131167	0.103679
CCR4-NOT transcription complex subunit 1	Cnot1	0.112516	0.100021
Splicing factor 3B subunit 3	Sf3b3	0.0205359	0.828951
Ribosome-binding protein 1	Rrbp1	-0.305372	0.0053947
E3 ubiquitin-protein ligase HUWE1	Huwe1	-1.94755	0.000500664
Structural maintenance of chromosomes protein 3	Smc3	0.0374708	0.550726
Structural maintenance of chromosomes flexible hinge domain-containing protein 1	Smchd1	-0.126898	0.118396
DNA damage-binding protein 1	Ddb1	0.100285	0.0814148
Fermitin family homolog 3	Fermt3	0.186331	0.0336722
Endoplasmic reticulum chaperone BiP	Hspa5	-0.223304	0.0297414
Hexokinase-1	Hk1	-0.143985	0.0849385
Alanine--tRNA ligase, cytoplasmic	Aars1	0.0506699	0.317716
N-alpha-acetyltransferase 15, NatA auxiliary subunit	Naa15	0.170467	0.0364713
T-complex protein 1 subunit alpha	Tcp1	0.121875	0.0463594
Aconitate hydratase, mitochondrial	Aco2	-0.1335	0.0487015
Lamin-B1	Lmnb1	-0.0441172	0.336866
Protein disulfide-isomerase A3	Pdia3	-0.202916	0.0207903
Alpha-actinin-4	Actn4	-0.0415308	0.308632
Kinesin-1 heavy chain	Kif5b	0.101683	0.0806824
Valine--tRNA ligase	Vars1	0.204654	0.0139091
DNA replication licensing factor MCM6	Mcm6	-0.0142303	0.787159
Cullin-associated NEDD8-dissociated protein 1	Cand1	0.151907	0.032171
Lon protease homolog, mitochondrial	Lonp1	-0.209307	0.0184255
Spectrin alpha chain, non-erythrocytic 1	Sptan1	-0.00399982	0.982532
Phosphatidylinositol 3,4,5-trisphosphate 5-phosphatase 1	Inpp5d	0.0197907	0.66805
Moesin	Msn	0.0805291	0.174783
T-complex protein 1 subunit beta	Cct2	0.0866529	0.0911671
Adenylyl cyclase-associated protein 1	Cap1	0.0475232	0.222147
V-type proton ATPase catalytic subunit A	Atp6v1a	0.0129316	0.868921
Transferrin receptor protein 1	Tfrc	-0.15758	0.0342156
Early endosome antigen 1	Eea1	0.0315361	0.62098
T-complex protein 1 subunit theta	Cct8	0.156418	0.0432622
Stress-70 protein, mitochondrial	Hspa9	-0.175635	0.0469214
Tubulin beta-2A chain	Tubb2a	0.0671473	0.323546
Heat shock protein HSP 90-alpha	Hsp90aa1	0.127833	0.0366792
6-phosphogluconate dehydrogenase, decarboxylating	Pgd	-0.0554949	0.36919
DNA replication licensing factor MCM2	Mcm2	-0.0441208	0.4803
Isoleucine--tRNA ligase, cytoplasmic	Iars1	0.0315286	0.572781
T-complex protein 1 subunit epsilon	Cct5	0.102482	0.0643459
RNA cytidine acetyltransferase	Nat10	-0.125331	0.0586496
E3 ubiquitin-protein ligase HECTD1	Hectd1	0.449909	0.00491926
Elongation factor 1-alpha 1	Eef1a1	0.245604	0.0642527
RNA cytosine C(5)-methyltransferase NSUN2	Nsun2	-0.0108458	0.804832
Nuclear pore complex protein Nup93	Nup93	-0.00989367	0.864941
Dynactin subunit 1	Dctn1	0.0787714	0.214389
Cytoplasmic FMR1-interacting protein 1	Cyfip1	0.0495804	0.400296
Major vault protein	Mvp	-0.0492554	0.475989
Protein PRRC2C	Prrc2c	0.0616085	0.340853
Tyrosine-protein kinase BAZ1B	Baz1b	-0.0600433	0.418638
Filamin-C	Flnc	0.105614	0.111243
Antiviral innate immune response receptor RIG-I	Ddx58	0.124869	0.167249
Pre-mRNA-splicing factor ATP-dependent RNA helicase DHX15	Dhx15	-0.0546857	0.330893
Phosphoribosylformylglycinamidine synthase	Pfas	0.0607815	0.192729
Unconventional myosin-XVIIIa	Myo18a	0.0446837	0.598621
2-oxoglutarate dehydrogenase, mitochondrial	Ogdh	-0.197173	0.0336722
Glucose-6-phosphate isomerase	Gpi	0.0852588	0.151288
Tripeptidyl-peptidase 2	Tpp2	0.0653565	0.146551
26S proteasome non-ATPase regulatory subunit 2	Psmd2	-0.0205463	0.603874
Vinculin	Vcl	0.136264	0.0560244
Nucleoporin 205	Nup205	-0.0336291	0.574107
Regulator of nonsense transcripts 1	Upf1	0.14837	0.0462371
Creatine kinase B-type	Ckb	0.0275683	0.589152
SWI/SNF-related matrix-associated actin-dependent regulator of chromatin subfamily A member 5	Smarca5	0.00459316	0.93447
DNA replication licensing factor MCM3	Mcm3	-0.0662875	0.187916
Peptidyl-prolyl cis-trans isomerase FKBP4	Fkbp4	0.108348	0.161202
Tyrosine-protein phosphatase non-receptor type 6	Ptpn6	0.234946	0.017626
Tubulin alpha-1C chain	Tuba1c	0.160308	0.0410259
Poly [ADP-ribose] polymerase 1	Parp1	0.0483028	0.553171
CCAAT/enhancer-binding protein zeta	Cebpz	-0.134209	0.0623785
Non-POU domain-containing octamer-binding protein	Nono	-0.10919	0.308684
Golgi autoantigen, golgin subfamily b, macrogolgin 1	Golgb1	-0.122233	0.148701
ATP synthase subunit beta, mitochondrial	Atp5f1b	-0.192074	0.081208
C-1-tetrahydrofolate synthase, cytoplasmic	Mthfd1	0.0292167	0.563536
Exportin-2	Cse1l	0.18035	0.0253757
Protein disulfide-isomerase A4	Pdia4	-0.384667	0.00294546
CAP-Gly domain-containing linker protein 1	Clip1	0.142163	0.0551539
Structural maintenance of chromosomes protein 2	Smc2	0.178234	0.0352783
Nuclear migration protein nudC	Nudc	0.0292579	0.684119
Helicase with zinc finger domain 2	Helz2	0.0226009	0.704876
DNA-directed RNA polymerase II subunit RPB1	Polr2a	-0.0217567	0.730285
T-complex protein 1 subunit delta	Cct4	0.121127	0.0463594
Probable ATP-dependent RNA helicase DDX17	Ddx17	-0.0435165	0.476353
Probable ATP-dependent RNA helicase DDX5	Ddx5	-0.0102581	0.797945
1-phosphatidylinositol 4,5-bisphosphate phosphodiesterase gamma-2	Plcg2	0.125385	0.0503238
26S proteasome regulatory subunit 8	Psmc5	-0.0489042	0.361121
Endoplasmic reticulum aminopeptidase 1	Erap1	-0.161643	0.0519005
26S proteasome regulatory subunit 6A	Psmc3	-0.0625085	0.240138
DNA ligase 1	Lig1	0.190163	0.0229093
Methionine--tRNA ligase, cytoplasmic	Mars1	0.09385	0.114303
Exosome RNA helicase MTR4	Mtrex	-0.0625106	0.376506
Ubiquitin-like modifier-activating enzyme 6	Uba6	0.143716	0.0547671
Eukaryotic translation initiation factor 4 gamma 2	Eif4g2	-0.0750472	0.236096
Polyadenylate-binding protein 1	Pabpc1	0.0673353	0.326935
DNA replication licensing factor MCM5	Mcm5	-0.0877428	0.267339
Gelsolin	Gsn	-0.0824378	0.173075
Acetyl-CoA carboxylase 1	Acaca	0.161302	0.0406637
MICOS complex subunit Mic60	Immt	-0.116513	0.0957946
Interleukin enhancer-binding factor 3	Ilf3	-0.00767325	0.900512
Protein disulfide-isomerase	P4hb	-0.38013	0.00491926
T-complex protein 1 subunit eta	Cct7	0.120131	0.109631
Hypoxia up-regulated protein 1	Hyou1	-0.323967	0.0061129
Dihydropyrimidinase-related protein 2	Dpysl2	0.0632959	0.223821
Lysine--tRNA ligase	Kars1	0.018832	0.779459
Cytosolic non-specific dipeptidase	Cndp2	-0.0284319	0.666147
E3 ubiquitin-protein ligase TRIP12	Trip12	0.376191	0.00450245
Importin subunit beta-1	Kpnb1	0.00267707	0.988474
Nucleolin	Ncl	-0.0304238	0.7489
Protein mono-ADP-ribosyltransferase PARP14	Parp14	-0.00811787	0.890258
Coiled-coil domain-containing protein 88B	Ccdc88b	0.205055	0.0469408
Golgin subfamily A member 4	Golga4	-0.0709719	0.383703
NADPH--cytochrome P450 reductase	Por	-0.210459	0.0261448
DnaJ heat shock protein family (Hsp40) member C13	Dnajc13	-0.0171338	0.765592
Insulin-degrading enzyme	Ide	0.084019	0.143615
116 kDa U5 small nuclear ribonucleoprotein component	Eftud2	-0.0211855	0.641665
Histone-binding protein RBBP7	Rbbp7	0.0749773	0.406153
Signal transducer and activator of transcription 1	Stat1	-0.149213	0.0283221
EH domain-containing protein 4	Ehd4	-0.0477664	0.322175
Ubiquitin carboxyl-terminal hydrolase 14	Usp14	0.0976172	0.0907346
Exportin-1	Xpo1	0.0926864	0.185159
Nuclear pore complex protein Nup214	Nup214	-0.0214847	0.795517
Heme oxygenase 1	Hmox1	-0.512258	0.00506623
Rho guanine nucleotide exchange factor 2	Arhgef2	0.206066	0.0320443
Cytosol aminopeptidase	Lap3	-0.136352	0.0539941
Heat shock 70 kDa protein 4L	Hspa4l	-0.0065263	0.908585
SWI/SNF complex subunit SMARCC1	Smarcc1	-0.0581444	0.423047
Nuclear pore complex protein Nup155	Nup155	-0.0469195	0.419025
Serum albumin	ALB	NA	NA
Annexin A5	Anxa5	0.108653	0.0990865
Fumarate hydratase, mitochondrial	Fh	-0.0214311	0.61949
Neutral alpha-glucosidase AB	Ganab	-0.181917	0.0342156
Serine/arginine repetitive matrix protein 2	Srrm2	0.15588	0.113795
Transcription intermediary factor 1-beta	Trim28	0.0231273	0.662856
Probable ubiquitin carboxyl-terminal hydrolase FAF-X	Usp9x	-0.00471045	0.921965
ATP synthase subunit alpha, mitochondrial	Atp5f1a	-0.0877902	0.198738
STE20-like serine/threonine-protein kinase	Slk	0.12851	0.0620383
Nucleolar protein 56	Nop56	-0.00968737	0.840107
DNA repair protein RAD50	Rad50	-0.0238275	0.650468
Annexin A2	Anxa2	-0.174197	0.079941
Structural maintenance of chromosomes protein 4	Smc4	0.147362	0.055712
Serrate RNA effector molecule homolog	Srrt	-0.0553684	0.342052
Coatomer subunit beta'	Copb2	0.060263	0.25685
2'-5'-oligoadenylate synthase 3	Oas3	0.214667	0.0177468
Thyroid hormone receptor-associated protein 3	Thrap3	-0.0750736	0.356203
26S proteasome non-ATPase regulatory subunit 3	Psmd3	0.0665157	0.505843
Ubiquitin carboxyl-terminal hydrolase 5	Usp5	0.0419414	0.427867
Delta-1-pyrroline-5-carboxylate synthase	Aldh18a1	-0.23248	0.0209956
Vesicle-fusing ATPase	Nsf	-0.130872	0.0792068
DNA replication licensing factor MCM4	Mcm4	-0.0559606	0.404126
Eukaryotic translation initiation factor 4 gamma 3	Eif4g3	0.0830143	0.238222
FACT complex subunit SPT16	Supt16h	0.0306597	0.571143
Protein flightless-1 homolog	Flii	0.0725415	0.222697
L-lactate dehydrogenase A chain	Ldha	0.0624606	0.366758
Symplekin	Sympk	0.000458994	0.994952
Glutamine--tRNA ligase	Qars1	0.143298	0.071864
Serine hydroxymethyltransferase, mitochondrial	Shmt2	-0.120993	0.0752377
Splicing factor 3b, subunit 2	Sf3b2	-0.107024	0.0584397
26S proteasome non-ATPase regulatory subunit 6	Psmd6	-0.0366247	0.373927
Annexin A1	Anxa1	-0.122224	0.149172
Glutamine--fructose-6-phosphate aminotransferase [isomerizing] 1	Gfpt1	-0.0209675	0.773193
Clustered mitochondria protein homolog	Cluh	0.0984695	0.13138
GRIP1-associated protein 1	Gripap1	0.17881	0.055712
60S ribosomal protein L5	Rpl5	-0.038087	0.635694
Eukaryotic translation initiation factor 3 subunit C	Eif3c	0.0756392	0.143589
Carboxypeptidase D	Cpd	-0.304976	0.0106575
26S proteasome non-ATPase regulatory subunit 1	Psmd1	-0.0596019	0.345439
Kinectin	Ktn1	-0.0388063	0.558164
NADH-ubiquinone oxidoreductase 75 kDa subunit, mitochondrial	Ndufs1	-0.260234	0.0128218
Stress-induced-phosphoprotein 1	Stip1	0.0187116	0.762043
Elongation factor Tu, mitochondrial	Tufm	-0.157324	0.0432794
RuvB-like 1	Ruvbl1	-0.0494482	0.32451
Malate dehydrogenase, mitochondrial	Mdh2	-0.218873	0.0235196
Glycerol-3-phosphate dehydrogenase, mitochondrial	Gpd2	-0.138289	0.0605389
Switch-associated protein 70	Swap70	0.194388	0.0207868
RuvB-like 2	Ruvbl2	-0.0123541	0.823844
THO complex subunit 2	Thoc2	-0.161303	0.101411
Receptor-type tyrosine-protein phosphatase C	Ptprc	-0.113473	0.184751
Double-stranded RNA-specific adenosine deaminase	Adar	0.0516047	0.298223
Heterogeneous nuclear ribonucleoprotein U	Hnrnpu	0.012502	0.873483
DNA replication licensing factor MCM7	Mcm7	0.00215622	0.976881
Baculoviral IAP repeat-containing protein 6	Birc6	0.138172	0.0792068
Aldo-keto reductase family 1 member B1	Akr1b1	-0.276384	0.0361298
Serotransferrin	TF	NA	NA
Probable ATP-dependent RNA helicase DDX46	Ddx46	-0.0264086	0.611278
La-related protein 1	Larp1	0.0366127	0.582108
Calnexin	Canx	-0.154214	0.0845489
Cysteine--tRNA ligase, cytoplasmic	Cars1	0.00242486	0.98144
Eukaryotic initiation factor 4A-I	Eif4a1	0.289494	0.00589227
General vesicular transport factor p115	Uso1	-0.0318401	0.607988
Eukaryotic translation initiation factor 5B	Eif5b	0.100417	0.0634101
Septin-2	Septin2	0.111271	0.203356
Heterogeneous nuclear ribonucleoprotein R	Hnrnpr	-0.0745353	0.201136
GMP synthase [glutamine-hydrolyzing]	Gmps	0.132778	0.0634101
AP-1 complex subunit beta-1	Ap1b1	0.0405982	0.337626
Heterogeneous nuclear ribonucleoprotein A1	Hnrnpa1	-0.0239009	0.693026
Host cell factor 1	Hcfc1	0.0721128	0.172187
Calcium-binding mitochondrial carrier protein Aralar1	Slc25a12	-0.177471	0.0539941
Asparagine--tRNA ligase, cytoplasmic	NARS1	0.00417363	0.929319
Eukaryotic translation initiation factor 3 subunit B	Eif3b	0.0853505	0.075927
ATP-citrate synthase	Acly	0.137667	0.0802306
Unconventional myosin-Va	Myo5a	0.104768	0.112644
DnaJ homolog subfamily C member 7	Dnajc7	0.0808529	0.171627
Transducin beta-like protein 3	Tbl3	-0.185698	0.0469408
Cullin-2	Cul2	0.113365	0.17568
Ran GTPase-activating protein 1	Rangap1	0.372757	0.00286577
Aspartate--tRNA ligase, cytoplasmic	Dars1	0.0302763	0.482308
Phosphoglucomutase-1	Pgm1	-0.156284	0.0421273
Elongation factor G, mitochondrial	Gfm1	-0.169556	0.199501
Heterogeneous nuclear ribonucleoprotein L	Hnrnpl	-0.0437365	0.538308
GTP-binding protein 4	Gtpbp4	-0.0482911	0.311145
Protein-tyrosine kinase 2-beta	Ptk2b	0.144392	0.055712
Putative helicase MOV-10	Mov10	-0.155192	0.0416501
Nodal modulator 1	Nomo1	-0.177882	0.0518048
Prolyl endopeptidase	Prep	0.172554	0.0741332
26S proteasome regulatory subunit 7	Psmc2	-0.0106276	0.874715
Protein mono-ADP-ribosyltransferase PARP9	Parp9	0.0335619	0.596891
Plexin-B2	Plxnb2	-0.06477	0.365286
Golgin subfamily A member 3	Golga3	-0.144986	0.0849975
Cold shock domain-containing protein E1	Csde1	0.215796	0.0158718
Programmed cell death 6-interacting protein	Pdcd6ip	0.127027	0.0600418
Pyruvate carboxylase, mitochondrial	Pc	-0.180218	0.123644
Serine/threonine-protein kinase PAK 2	Pak2	0.117378	0.0462371
ADP/ATP translocase 2	Slc25a5	-0.0526886	0.572589
Protein RCC2	Rcc2	0.288587	0.00974055
Polypyrimidine tract-binding protein 1	Ptbp1	-0.0489449	0.45064
60S ribosomal protein L3	Rpl3	0.0835051	0.142962
Enhancer of mRNA-decapping protein 4	Edc4	0.125927	0.0735504
Apolipoprotein B receptor	Apobr	0.214163	0.0444267
Triosephosphate isomerase	Tpi1	0.102551	0.0838697
Coatomer subunit delta	Arcn1	0.0302833	0.5376
Reticulon-4	Rtn4	0.00809003	0.908113
Matrin-3	Matr3	-0.0623437	0.350977
ATP-dependent RNA helicase DDX1	Ddx1	-0.0542801	0.365934
Biorientation of chromosomes in cell division protein 1-like 1	Bod1l	0.0432501	0.663403
Ubiquitin carboxyl-terminal hydrolase 7	Usp7	0.0299819	0.648113
Ribonuclease inhibitor	Rnh1	0.0884643	0.094268
Vacuolar protein sorting-associated protein 35	Vps35	0.123042	0.0571204
WD repeat-containing protein 1	Wdr1	0.108895	0.0678195
Heterogeneous nuclear ribonucleoprotein K	Hnrnpk	0.0667551	0.177288
RRP12-like protein	Rrp12	-0.132533	0.141436
Transcription elongation regulator 1	Tcerg1	0.0108988	0.874715
Golgin subfamily A member 2	Golga2	-0.147253	0.0799328
Proliferating cell nuclear antigen	Pcna	0.0374022	0.58818
Homeobox protein cut-like 1	Cux1	0.0270053	0.707612
ATP-binding cassette sub-family F member 1	Abcf1	0.17739	0.017626
Threonine--tRNA ligase 1, cytoplasmic	Tars1	0.0715773	0.304946
Golgi apparatus protein 1	Glg1	-0.193479	0.0337904
Sister chromatid cohesion protein PDS5 homolog A	Pds5a	0.119597	0.0634703
Elongation factor 1-gamma	Eef1g	0.1267	0.0550392
Arf-GAP with Rho-GAP domain, ANK repeat and PH domain-containing protein 1	Arap1	0.182034	0.0428829
Presequence protease, mitochondrial	Pitrm1	-0.217115	0.0462371
Eukaryotic translation initiation factor 3 subunit L	Eif3l	0.0497093	0.369453
Probable ATP-dependent RNA helicase DDX27	Ddx27	-0.149127	0.0371154
Nuclear valosin-containing protein-like	Nvl	0.289438	0.0156038
Nucleophosmin	Npm1	-0.0455921	0.614726
UDP-N-acetylhexosamine pyrophosphorylase-like protein 1	Uap1l1	0.143078	0.024539
Rho guanine nucleotide exchange factor 1	Arhgef1	0.266654	0.0152322
Cell division cycle 5-like protein	Cdc5l	0.0444001	0.471154
Succinate dehydrogenase [ubiquinone] flavoprotein subunit, mitochondrial	Sdha	-0.102539	0.112002
NSFL1 cofactor p47	Nsfl1c	0.00467589	0.933424
Lipopolysaccharide-responsive and beige-like anchor protein	Lrba	0.128686	0.178362
Unconventional myosin-Ie	Myo1e	-0.0210242	0.679835
Catalase	Cat	-0.335205	0.00353585
Syntaxin-binding protein 1	Stxbp1	-0.0311161	0.600176
Calreticulin	Calr	-0.253492	0.018179
N-acetylgalactosaminyltransferase 7	Galnt7	-0.278867	0.028464
26S proteasome non-ATPase regulatory subunit 11	Psmd11	-0.125781	0.0385933
A-kinase anchor protein 9	Akap9	0.00592521	0.952714
Dolichyl-diphosphooligosaccharide--protein glycosyltransferase subunit 1	Rpn1	-0.218158	0.0170629
Nardilysin	Nrdc	0.121368	0.0743166
Ankyrin repeat and KH domain-containing 1	Ankhd1	0.111286	0.146972
Rho guanine nucleotide exchange factor 7	Arhgef7	0.0249533	0.679428
Aspartate aminotransferase, mitochondrial	Got2	-0.161413	0.108948
Proliferation-associated protein 2G4	Pa2g4	0.13026	0.0741195
26S proteasome regulatory subunit 4	Psmc1	0.0786242	0.376298
Guanine nucleotide-binding protein-like 3	Gnl3	0.0271301	0.719229
Intersectin-2	Itsn2	0.0743784	0.28996
Isocitrate dehydrogenase [NADP] cytoplasmic	Idh1	-0.0725424	0.19152
Obg-like ATPase 1	Ola1	0.0105195	0.844986
Heterogeneous nuclear ribonucleoprotein U-like protein 2	Hnrnpul2	-0.0634599	0.235781
Polyribonucleotide nucleotidyltransferase 1, mitochondrial	Pnpt1	-0.331159	0.0245378
Exportin-5	Xpo5	0.0456153	0.409086
Protein transport protein Sec23B	Sec23b	-0.011227	0.852664
Serine--tRNA ligase, cytoplasmic	Sars1	0.00350764	0.936531
Cation-independent mannose-6-phosphate receptor	Igf2r	-0.0118689	0.851317
Unconventional myosin-Id	Myo1d	-0.0622648	0.258387
E3 ubiquitin-protein ligase UBR5	Ubr5	0.101172	0.274107
AP-3 complex subunit delta-1	Ap3d1	0.0766269	0.434126
AP-2 complex subunit alpha-1	Ap2a1	-0.0154762	0.813167
Deoxynucleoside triphosphate triphosphohydrolase SAMHD1	Samhd1	-0.210484	0.0149724
Spliceosome RNA helicase Ddx39b	Ddx39b	-0.155531	0.133671
Thyroid hormone receptor interactor 11	Trip11	0.22692	0.0714009
Dihydrolipoyllysine-residue acetyltransferase component of pyruvate dehydrogenase complex, mitochondrial	Dlat	-0.105336	0.0810103
ATP-dependent RNA helicase DHX29	Dhx29	0.0205332	0.804832
Ubiquitin carboxyl-terminal hydrolase 4	Usp4	0.137942	0.0680571
Cytosolic phospholipase A2	Pla2g4a	0.110478	0.0478671
Serine/threonine-protein phosphatase 2A 65 kDa regulatory subunit A alpha isoform	Ppp2r1a	0.00361079	0.97822
1-phosphatidylinositol 4,5-bisphosphate phosphodiesterase	Plcb4	0.118868	0.114478
Long-chain-fatty-acid--CoA ligase 4	Acsl4	0.0236462	0.684892
Protein diaphanous homolog 1	Diaph1	-0.148289	0.13692
26S proteasome regulatory subunit 10B	Psmc6	-0.104277	0.125351
Exosome complex exonuclease RRP44	Dis3	0.0403485	0.590023
Nucleolar protein 58	Nop58	-0.0523541	0.428146
Processing of 1, ribonuclease P/MRP family, (S. cerevisiae)	Pop1	-0.0113668	0.855967
Probable RNA-binding protein 19	Rbm19	-0.0683483	0.388413
Isocitrate dehydrogenase [NAD] subunit, mitochondrial	Idh3b	-0.173188	0.0495073
Eukaryotic translation initiation factor 5	Eif5	0.173858	0.0343248
Rho GTPase-activating protein 45	Arhgap45	-0.0629039	0.458514
ATPase family AAA domain-containing protein 3	Atad3	-0.123297	0.0619266
Protein arginine N-methyltransferase 1	Prmt1	0.0184596	0.826401
Ataxin-10	Atxn10	-0.0996567	0.15504
D-3-phosphoglycerate dehydrogenase	Phgdh	0.110753	0.0488163
Tyrosine--tRNA ligase, cytoplasmic	Yars1	-0.00736408	0.916847
Platelet-activating factor acetylhydrolase IB subunit beta	Pafah1b1	0.0909688	0.149172
Constitutive coactivator of PPAR-gamma-like protein 1	FAM120A	0.0695207	0.170504
Pre-mRNA-processing factor 6	Prpf6	-0.129713	0.0835993
Actin-related protein 3	Actr3	0.0934273	0.137879
Transcription elongation factor SPT5	Supt5h	0.151731	0.0825815
Nuclear cap-binding protein subunit 1	Ncbp1	-0.0218137	0.744349
Leucyl-cystinyl aminopeptidase	Lnpep	-0.0899849	0.440626
Exosome component 10	Exosc10	0.030137	0.700151
Transcription elongation factor SPT6	Supt6h	0.0225416	0.770416
Rho guanine nucleotide exchange factor 6	Arhgef6	0.0630279	0.208498
Ubiquitin carboxyl-terminal hydrolase 15	Usp15	0.166999	0.0433474
von Willebrand factor A domain-containing protein 5A	Vwa5a	0.0043521	0.938252
Radixin	Rdx	0.121908	0.158004
Coatomer subunit gamma-1	Copg1	0.0757964	0.177853
Plasma membrane calcium-transporting ATPase 1	Atp2b1	-0.125166	0.0824628
Succinyl-CoA:3-ketoacid coenzyme A transferase 1, mitochondrial	Oxct1	-0.0722534	0.350602
Protein SON	Son	0.0487042	0.324162
Asparagine synthetase [glutamine-hydrolyzing]	Asns	0.091334	0.0806824
Nuclear pore complex protein Nup98-Nup96	Nup98	-0.173263	0.131441
Splicing factor 3A subunit 1	Sf3a1	-0.0917158	0.0863846
60S ribosomal protein L4	Rpl4	-0.0167151	0.721605
Alpha-soluble NSF attachment protein	Napa	-0.00501098	0.956557
Cis-aconitate decarboxylase	Acod1	-0.321399	0.0508669
DnaJ homolog subfamily A member 1	Dnaja1	0.132004	0.123727
Nck-associated protein 1-like	Nckap1l	0.0252225	0.81441
Hsp70-binding protein 1	Hspbp1	0.131034	0.138515
Apoptotic chromatin condensation inducer in the nucleus	Acin1	-0.0303762	0.765592
Heterogeneous nuclear ribonucleoproteins A2/B1	Hnrnpa2b1	-0.0917544	0.321001
Receptor of activated protein C kinase 1	Rack1	0.0124062	0.869136
WD40 repeat-containing protein SMU1	Smu1	0.0507487	0.49612
Probable global transcription activator SNF2L2	Smarca2	0.050188	0.538665
Heterogeneous nuclear ribonucleoprotein A3	Hnrnpa3	-0.093934	0.218954
26S proteasome non-ATPase regulatory subunit 12	Psmd12	-0.039803	0.713323
Chloride intracellular channel protein 4	Clic4	0.113237	0.152169
Eukaryotic translation initiation factor 3 subunit D	Eif3d	0.109336	0.079611
Adenosylhomocysteinase	Ahcy	0.20432	0.0240906
Elongation factor 1-alpha 2	Eef1a2	0.175575	0.0959309
Protein transport protein Sec31A	Sec31a	-0.0196216	0.688593
Xaa-Pro aminopeptidase 1	Xpnpep1	0.0513585	0.28996
Nuclear autoantigenic sperm protein	Nasp	0.143577	0.109596
Signal recognition particle receptor subunit alpha	Srpra	-0.195655	0.0393068
Cytospin-B	Specc1	0.0274002	0.652376
Zinc finger protein 638	Znf638	0.0835044	0.14387
Eukaryotic translation initiation factor 3 subunit F	Eif3f	-0.0573937	0.292497
Glutamate dehydrogenase 1, mitochondrial	Glud1	-0.139068	0.0423517
40S ribosomal protein S3	Rps3	0.154721	0.0647618
Far upstream element-binding protein 2	Khsrp	-0.0677272	0.291363
Inactive tyrosine-protein kinase PEAK1	Peak1	0.0605017	0.440549
Engulfment and cell motility protein 1	Elmo1	0.0832321	0.174303
Scaffold attachment factor B1	Safb	-0.0998182	0.374616
Activating signal cointegrator 1 complex subunit 3	Ascc3	-0.0152767	0.877382
ATP-binding cassette sub-family E member 1	Abce1	0.120335	0.055915
Condensin complex subunit 1	Ncapd2	0.176243	0.0487015
Heat shock protein 75 kDa, mitochondrial	Trap1	-0.0864497	0.128793
Eukaryotic translation initiation factor 3 subunit I	Eif3i	0.115829	0.0959309
Ubiquitin carboxyl-terminal hydrolase 25	Usp25	-0.0438537	0.360271
Phosphatidylinositol-3-phosphatase SAC1	Sacm1l	-0.242814	0.0337904
Cullin-3	Cul3	0.0905124	0.224095
GTPase-activating protein and VPS9 domain-containing protein 1	Gapvd1	0.0129878	0.827075
RNA polymerase-associated protein CTR9 homolog	Ctr9	0.0271468	0.677767
SUMO-activating enzyme subunit 2	Uba2	0.0594396	0.306838
Peroxisomal multifunctional enzyme type 2	Hsd17b4	-0.0702201	0.380011
Annexin A7	Anxa7	-0.115586	0.115833
Rho-associated protein kinase 1	Rock1	0.155718	0.0462826
General transcription factor II-I	Gtf2i	0.167642	0.0625574
Lupus La protein homolog	Ssb	0.000108262	0.99948
DNA mismatch repair protein Msh6	Msh6	0.0502348	0.565382
UMP-CMP kinase 2, mitochondrial	Cmpk2	-0.426421	0.00340335
Protein phosphatase 1 regulatory subunit 7	Ppp1r7	0.0757893	0.420953
Pumilio homolog 3	Pum3	-0.0559877	0.421691
14-3-3 protein epsilon	Ywhae	-0.0359441	0.700154
Peptidyl-prolyl cis-trans isomerase A	Ppia	0.154168	0.0824471
Microtubule-associated protein 4	Map4	0.0522798	0.539981
Interferon-induced transmembrane protein 3	Ifitm3	-0.109151	0.40568
Cathepsin B	Ctsb	-0.20424	0.173094
ATP-dependent RNA helicase DDX42	Ddx42	-0.0437991	0.601374
Importin-7	Ipo7	0.177712	0.0462371
26S proteasome regulatory subunit 6B	Psmc4	-0.0647563	0.178894
V-type proton ATPase subunit B, brain isoform	Atp6v1b2	0.0901218	0.16775
Thimet oligopeptidase	Thop1	-0.0364077	0.387109
Protein Niban 2	Niban2	-0.0847691	0.113795
Phosphoserine aminotransferase	Psat1	-0.0282603	0.508756
ATP-binding cassette sub-family F member 2	Abcf2	0.0784589	0.135696
Formin-like protein 1	Fmnl1	0.0816855	0.331111
26S proteasome non-ATPase regulatory subunit 13	Psmd13	0.000919827	0.988862
Succinate--CoA ligase [GDP-forming] subunit beta, mitochondrial	Suclg2	-0.208324	0.028985
Heterogeneous nuclear ribonucleoprotein H	Hnrnph1	-0.102702	0.0750476
Centrosome-associated protein CEP250	Cep250	-0.0421543	0.603874
Transport and Golgi organization protein 1 homolog	Mia3	-0.130989	0.132461
NFX1-type zinc finger-containing protein 1	Znfx1	0.140358	0.075158
Glutaminase kidney isoform, mitochondrial	Gls	-0.0506494	0.424608
Leukotriene A-4 hydrolase	Lta4h	0.103226	0.0806824
Catenin delta-1	Ctnnd1	0.209863	0.0297414
DNA topoisomerase 1	Top1	-0.157935	0.0307545
Septin-9	Septin9	-0.134124	0.0462371
Nuclear pore membrane glycoprotein 210	Nup210	-0.016987	0.852474
Centromere/kinetochore protein zw10 homolog	Zw10	-0.0327647	0.741515
Histone H4	H4f16	0.0481847	0.538683
Serpin B6	Serpinb6	0.20729	0.0243431
Zinc finger CCCH domain-containing protein 11A	Zc3h11a	-0.020141	0.736561
Aminopeptidase B	Rnpep	0.00466863	0.919433
Sorting nexin-9	Snx9	0.0291459	0.646463
Far upstream element-binding protein 1	Fubp1	0.138328	0.0428464
Coiled-coil domain-containing protein 22	Ccdc22	0.0981896	0.0824471
ATP-dependent 6-phosphofructokinase, platelet type	Pfkp	-0.0669467	0.462755
Short-chain specific acyl-CoA dehydrogenase, mitochondrial	Acads	-0.117053	0.227521
Cullin-1	Cul1	0.198228	0.0543251
RNA helicase	Ddx23	-0.011233	0.868921
Eukaryotic translation initiation factor 3 subunit E	Eif3e	0.0720138	0.417642
Tyrosine-protein phosphatase non-receptor type 23	Ptpn23	0.0864324	0.304696
Sodium/potassium-transporting ATPase subunit alpha-2	Atp1a2	NA	NA
Eukaryotic peptide chain release factor GTP-binding subunit ERF3A	Gspt1	0.0952332	0.19537
Hexokinase-3	Hk3	0.010258	0.866042
Phospholipase A-2-activating protein	Plaa	0.0389233	0.386154
Ras GTPase-activating protein-binding protein 2	G3bp2	0.0419528	0.551493
FACT complex subunit SSRP1	Ssrp1	0.0606697	0.243328
Zinc phosphodiesterase ELAC protein 2	Elac2	0.0214624	0.737641
Eukaryotic translation initiation factor 2 subunit 2	Eif2s2	0.189424	0.0724241
Dolichyl-diphosphooligosaccharide--protein glycosyltransferase subunit 2	Rpn2	-0.202053	0.0207705
Ubiquitin carboxyl-terminal hydrolase 24	Usp24	0.0756645	0.373927
UDP-N-acetylglucosamine--peptide N-acetylglucosaminyltransferase 110 kDa subunit	Ogt	0.0493112	0.481686
Carbonic anhydrase 2	Ca2	0.133527	0.102279
Puromycin-sensitive aminopeptidase	Npepps	0.180481	0.0296809
Integrator complex subunit 1	Ints1	-0.092311	0.265711
Pyridoxal-dependent decarboxylase domain-containing protein 1	Pdxdc1	0.045497	0.419327
Ubiquitin-like modifier-activating enzyme ATG7	Atg7	0.0550219	0.475796
Poly(rC)-binding protein 1	Pcbp1	0.0472133	0.535599
Inositol 1,4,5-trisphosphate receptor type 3	Itpr3	-0.165862	0.108948
DNA mismatch repair protein Msh2	Msh2	0.132849	0.0962361
E3 ubiquitin-protein ligase BRE1A	Rnf20	0.0641672	0.344891
Arf-GAP with coiled-coil, ANK repeat and PH domain-containing protein 2	Acap2	0.102433	0.20565
pre-rRNA 2'-O-ribose RNA methyltransferase FTSJ3	Ftsj3	-0.025905	0.601062
Integrin alpha-M	Itgam	-0.0386444	0.674411
WD repeat-containing protein 75	Wdr75	-0.104526	0.169855
Centrosomal protein of 170 kDa	Cep170	-0.0586651	0.410388
Glycine amidinotransferase, mitochondrial	Gatm	-0.157622	0.0462826
Ras GTPase-activating protein-binding protein 1	G3bp1	0.00341867	0.936172
U4/U6.U5 tri-snRNP-associated protein 1	Sart1	0.047836	0.521857
Interferon-activable protein 204	Ifi204	-0.151537	0.123727
Peptidyl-prolyl cis-trans isomerase D	Ppid	0.107689	0.0779714
ATP-dependent RNA helicase DDX24	Ddx24	-0.0740706	0.256256
Fructose-bisphosphate aldolase C	Aldoc	0.160482	0.180612
ATP-dependent 6-phosphofructokinase, liver type	Pfkl	0.05917	0.253615
Apolipoprotein A-I	APOA1	NA	NA
40S ribosomal protein S4, X isoform	Rps4x	0.0653459	0.389795
14-3-3 protein zeta/delta	Ywhaz	0.0589155	0.502621
Inverted formin-2	Inf2	-0.02508	0.649912
Histidine--tRNA ligase, cytoplasmic	Hars1	0.0684487	0.397807
Eukaryotic initiation factor 4A-III	Eif4a3	0.0382654	0.63292
Sorting nexin-1	Snx1	-0.0172093	0.747212
Prohibitin	Phb	-0.151544	0.099305
Signal recognition particle subunit SRP68	Srp68	-0.011869	0.852573
Schlafen family member 5	Slfn5	-0.0240225	0.751505
Beta-glucuronidase	Gusb	-0.0619038	0.340853
BMS1 homolog, ribosome assembly protein (Yeast)	Bms1	-0.0795056	0.256041
RNA-binding protein 39	Rbm39	-0.0338362	0.632121
NADH dehydrogenase [ubiquinone] flavoprotein 1, mitochondrial	Ndufv1	-0.19973	0.130743
MORC family CW-type zinc finger protein 3	Morc3	0.0414937	0.438111
Band 4.1-like protein 2	Epb41l2	-0.181237	0.130743
Inosine-5'-monophosphate dehydrogenase 2	Impdh2	0.150539	0.0530012
Aldehyde dehydrogenase, mitochondrial	Aldh2	-0.136714	0.0779714
Nucleobindin-1	Nucb1	-0.0934126	0.191903
Protein LYRIC	Mtdh	-0.053632	0.519964
Eukaryotic peptide chain release factor subunit 1	Etf1	0.163199	0.0526164
Protein phosphatase 1 regulatory subunit 12A	Ppp1r12a	0.194971	0.0462371
Phosphoinositide 3-kinase adapter protein 1	Pik3ap1	-0.0316278	0.553901
Apoptosis inhibitor 5	Api5	0.0338567	0.605213
Annexin A6	Anxa6	-0.0993791	0.304503
Macrophage-capping protein	Capg	0.233783	0.0297177
Serine/threonine-protein phosphatase 2A catalytic subunit alpha isoform	Ppp2ca	0.0568395	0.375916
Phosphatidylinositol 3,4,5-trisphosphate 5-phosphatase 2	Inppl1	0.144328	0.0724274
Elongator complex protein 1	Elp1	0.0896366	0.157536
Histone acetyltransferase type B catalytic subunit	Hat1	0.295175	0.020389
GDP-mannose 4,6 dehydratase	Gmds	-0.0464865	0.380011
DnaJ homolog subfamily C member 2	Dnajc2	0.0383001	0.700151
Dynamin-like 120 kDa protein, mitochondrial	Opa1	-0.0900146	0.264627
T-complex protein 1 subunit zeta	Cct6a	0.0821981	0.194282
Vacuolar protein sorting-associated protein 11 homolog	Vps11	0.0941739	0.245258
Tuftelin-interacting protein 11	Tfip11	0.070435	0.396386
Transgelin-2	Tagln2	0.347891	0.0522386
DNA-directed RNA polymerase I subunit RPA1	Polr1a	-0.0823491	0.286749
Aminopeptidase N	Anpep	-0.263807	0.028464
Hsp90 co-chaperone Cdc37	Cdc37	0.154138	0.0367143
Chloride intracellular channel protein 1	Clic1	0.037033	0.596891
Annexin A4	Anxa4	-0.083757	0.152169
Aspartyl/asparaginyl beta-hydroxylase	Asph	-0.425053	0.00602846
NAD-dependent malic enzyme, mitochondrial	Me2	-0.204731	0.0320706
Serine-threonine kinase receptor-associated protein	Strap	0.124563	0.0699371
Phosphatidylinositol 4-phosphate 3-kinase C2 domain-containing subunit alpha	Pik3c2a	0.192947	0.056261
Actin-like protein 6A	Actl6a	0.0694503	0.218414
Dynamin-1-like protein	Dnm1l	0.110955	0.25685
Isocitrate dehydrogenase [NADP], mitochondrial	Idh2	-0.123556	0.368992
[truncated: 5,482 more rows]

## Sheet: A375_sgHUWE1_vs_sgAAVS1
Protein names	Gene names	logFC_sgHUWE1 vs_sgAAVS1	adj.P.Val_sgHUWE1 vs_sgAAVS1
[truncated: 5,141 more rows]

[truncated: 1 more sheets: SW620_sgHUWE1_vs_sgAAVS1]
